# Supplementary material for: Transcriptional changes and preservation of bone mass in hibernating black bears
Source: PubMed Central journal article supplement (PMC8050052; doi:10.1038/s41598-021-87785-9), 2021-04-15
Supplement: 41598_2021_87785_MOESM1_ESM.pdf [file 41598_2021_87785_MOESM1_ESM.pdf]

## Transcriptional changes and preservation of bone mass in hibernating black bears

Anna V. Goropashnaya<sup>1</sup>, Øivind Tøien<sup>1</sup>, Thiruvarangan Ramaraj<sup>2</sup>, Anitha Sundararajan<sup>3</sup>, Faye D. Schilkey<sup>3</sup>, Brian M. Barnes<sup>1</sup>, Seth W. Donahue<sup>4</sup>, Vadim B. Fedorov<sup>1\*</sup>

<sup>1</sup>Institute of Arctic Biology, University of Alaska Fairbanks, 2140 Koyukuk Dr., Fairbanks, AK 99775, USA

<sup>2</sup>School of Computing, DePaul University, Chicago, IL USA

<sup>3</sup>National Center for Genome Resources, 2935 Rodeo Park Dr. East, Santa Fe, NM 87505, USA

<sup>4</sup>Department of Biomedical Engineering, University of Massachusetts, 240 Thatcher Road, Amherst, MA 01003, USA

\*Contact Information: Vadim Fedorov, tel. +1 (907) 474 1533, e-mail: vfedorov@alaska.edu

**Table 1S.** Differentially expressed genes in bone of hibernating black bears comparing to summer active animals.

| Gene Name    | Gene ID                   | Fold Change | Log <sub>2</sub> fold change | P-value  | FDR p-value |
|--------------|---------------------------|-------------|------------------------------|----------|-------------|
| MYL6B        | <a href="#">113256435</a> | 162.4740562 | 7.344066                     | 0        | 0           |
| KLHL41       | <a href="#">113250800</a> | 114.9338219 | 6.84466                      | 2.66E-13 | 6.91E-12    |
| LMOD2        | <a href="#">113263587</a> | 113.105562  | 6.821526                     | 0        | 0           |
| NRAP         | <a href="#">113251946</a> | 106.0572481 | 6.728699                     | 7.77E-16 | 3.01E-14    |
| LOC113271211 | <a href="#">113271211</a> | 97.75769862 | 6.611138                     | 0        | 0           |
| HSPB3        | <a href="#">113263861</a> | 93.40003395 | 6.545351                     | 0        | 0           |
| EEF1A2       | <a href="#">113258809</a> | 82.70525339 | 6.369907                     | 3.37E-12 | 7.19E-11    |
| SGCA         | <a href="#">113265613</a> | 82.70160765 | 6.369843                     | 0        | 0           |
| PPP1R27      | <a href="#">113244502</a> | 82.25970373 | 6.362114                     | 0        | 0           |
| ABRA         | <a href="#">113252637</a> | 81.63162839 | 6.351056                     | 0        | 0           |
| ANKRD1       | <a href="#">113243097</a> | 80.25648891 | 6.326546                     | 0        | 0           |
| PDLIM3       | <a href="#">113262276</a> | 76.52717139 | 6.2579                       | 9.99E-14 | 2.79E-12    |
| MYOZ2        | <a href="#">113255609</a> | 76.35136036 | 6.254582                     | 0        | 0           |
| LOC113241702 | <a href="#">113241702</a> | 74.08287073 | 6.211068                     | 0        | 0           |
| PTP4A3       | <a href="#">113247947</a> | 73.01551541 | 6.190131                     | 0        | 0           |
| TMOD4        | <a href="#">113246165</a> | 70.96723559 | 6.149081                     | 2.72E-11 | 4.86E-10    |

|         |                           |             |          |          |          |
|---------|---------------------------|-------------|----------|----------|----------|
| CORO6   | <a href="#">113269076</a> | 68.94525041 | 6.107379 | 0        | 0        |
| ANKRD2  | <a href="#">113251786</a> | 68.65289234 | 6.101249 | 0        | 0        |
| LRRC2   | <a href="#">113256795</a> | 68.193157   | 6.091555 | 0        | 0        |
| APOBEC2 | <a href="#">113261323</a> | 67.8414811  | 6.084096 | 6.66E-16 | 2.62E-14 |
| FBP2    | <a href="#">113269786</a> | 66.54026372 | 6.056156 | 0        | 0        |
| HSPB7   | <a href="#">113270462</a> | 66.22117844 | 6.049221 | 0        | 0        |
| CERS1   | <a href="#">113256735</a> | 65.82250412 | 6.040509 | 0        | 0        |
| ACTA1   | <a href="#">113259054</a> | 65.34543282 | 6.030015 | 4.74E-10 | 6.77E-09 |
| LRRC39  | <a href="#">113254357</a> | 64.47340972 | 6.010632 | 0        | 0        |
| ASB5    | <a href="#">113262228</a> | 64.40407697 | 6.00908  | 0        | 0        |
| MYL2    | <a href="#">113267112</a> | 64.15830683 | 6.003564 | 9.49E-11 | 1.53E-09 |
| TPM2    | <a href="#">113260474</a> | 63.96095924 | 5.99912  | 2.73E-12 | 5.9E-11  |
| FABP3   | <a href="#">113268386</a> | 63.58680377 | 5.990655 | 0        | 0        |
| CMYA5   | <a href="#">113255166</a> | 63.43677193 | 5.987247 | 1.16E-09 | 1.54E-08 |
| TRIM54  | <a href="#">113271121</a> | 63.15459045 | 5.980816 | 0        | 0        |
| MYOT    | <a href="#">113261774</a> | 60.99748054 | 5.930678 | 1.77E-10 | 2.72E-09 |
| ASB2    | <a href="#">113267322</a> | 60.75613084 | 5.924958 | 0        | 0        |
| SMTNL2  | <a href="#">113271048</a> | 60.54542751 | 5.919946 | 0        | 0        |
| KLHL40  | <a href="#">113253826</a> | 59.75882181 | 5.90108  | 0        | 0        |
| CAP2    | <a href="#">113264496</a> | 59.75726479 | 5.901042 | 0        | 0        |
| TNNI1   | <a href="#">113242556</a> | 59.13503214 | 5.885941 | 1.13E-10 | 1.8E-09  |
| CAVIN4  | <a href="#">113260389</a> | 58.833484   | 5.878566 | 0        | 0        |
| MB      | <a href="#">113255877</a> | 58.74290628 | 5.876343 | 1.08E-10 | 1.72E-09 |
| MYOM3   | <a href="#">113268506</a> | 58.4232845  | 5.868472 | 0        | 0        |
| DUSP26  | <a href="#">113262149</a> | 58.31882464 | 5.86589  | 0        | 0        |
| CASQ1   | <a href="#">113246682</a> | 57.67343745 | 5.849835 | 3.66E-10 | 5.37E-09 |
| ASB11   | <a href="#">113240709</a> | 56.74105562 | 5.826321 | 0        | 0        |
| TNNC1   | <a href="#">113256540</a> | 56.45655863 | 5.819069 | 5.5E-10  | 7.77E-09 |

|              |                           |             |          |          |          |
|--------------|---------------------------|-------------|----------|----------|----------|
| ATP1B2       | <a href="#">113271155</a> | 55.50312957 | 5.794497 | 0        | 0        |
| PYGM         | <a href="#">113244160</a> | 55.03702984 | 5.782331 | 2.62E-09 | 3.21E-08 |
| MYPN         | <a href="#">113259106</a> | 54.78304708 | 5.775658 | 2.22E-16 | 9.61E-15 |
| MYBPC1       | <a href="#">113255963</a> | 54.14704334 | 5.758811 | 3.52E-09 | 4.2E-08  |
| FAM189A2     | <a href="#">113270200</a> | 53.79951851 | 5.749521 | 0        | 0        |
| TRIM72       | <a href="#">113267722</a> | 53.28074572 | 5.735542 | 0        | 0        |
| LOC113258282 | <a href="#">113258282</a> | 52.62286608 | 5.717618 | 0        | 0        |
| LOC113271214 | <a href="#">113271214</a> | 52.5809361  | 5.716468 | 1.06E-08 | 1.16E-07 |
| ASB16        | <a href="#">113265364</a> | 52.54323311 | 5.715433 | 0        | 0        |
| OBSCN        | <a href="#">113247488</a> | 51.94451583 | 5.6989   | 2.41E-09 | 3E-08    |
| HJV          | <a href="#">113247768</a> | 51.94080053 | 5.698796 | 0        | 0        |
| RPL3L        | <a href="#">113245098</a> | 51.43538693 | 5.684689 | 0        | 0        |
| DES          | <a href="#">113250426</a> | 51.36269872 | 5.682649 | 5.09E-10 | 7.25E-09 |
| CKM          | <a href="#">113243434</a> | 50.95619072 | 5.671186 | 8.64E-09 | 9.62E-08 |
| ADPRHL1      | <a href="#">113247549</a> | 50.86521864 | 5.668608 | 0        | 0        |
| SCN4A        | <a href="#">113265278</a> | 50.25589606 | 5.651221 | 0        | 0        |
| PKIA         | <a href="#">113253025</a> | 49.8661755  | 5.63999  | 0        | 0        |
| KLHL33       | <a href="#">113248953</a> | 49.6344082  | 5.633269 | 0        | 0        |
| MYL3         | <a href="#">113256802</a> | 49.53380788 | 5.630342 | 2.38E-11 | 4.31E-10 |
| TNNC2        | <a href="#">113258216</a> | 49.24170577 | 5.621809 | 9.74E-10 | 1.31E-08 |
| CLTCL1       | <a href="#">113245966</a> | 48.62898475 | 5.603745 | 0        | 0        |
| MYO18B       | <a href="#">113244987</a> | 48.61395626 | 5.603299 | 2.39E-13 | 6.28E-12 |
| S100A1       | <a href="#">113245339</a> | 48.50207757 | 5.599975 | 0        | 0        |
| NDRG2        | <a href="#">113248486</a> | 47.30762008 | 5.564001 | 6E-15    | 2.04E-13 |
| ACTN3        | <a href="#">113243937</a> | 47.26954546 | 5.562839 | 9.04E-09 | 1E-07    |
| ATP1B4       | <a href="#">113270910</a> | 47.05383876 | 5.556241 | 0        | 0        |
| MYLPF        | <a href="#">113267993</a> | 47.02949354 | 5.555494 | 9.33E-09 | 1.03E-07 |
| TXLNB        | <a href="#">113259499</a> | 46.81437708 | 5.54888  | 1.6E-13  | 4.33E-12 |

|              |                           |             |          |          |          |
|--------------|---------------------------|-------------|----------|----------|----------|
| PLN          | <a href="#">113259393</a> | 46.71479723 | 5.545808 | 1.78E-15 | 6.58E-14 |
| LOC113246737 | <a href="#">113246737</a> | 46.54309964 | 5.540495 | 1.2E-12  | 2.79E-11 |
| NEB          | <a href="#">113250884</a> | 46.51166283 | 5.539521 | 8.94E-10 | 1.21E-08 |
| ROS1         | <a href="#">113259385</a> | 46.49458672 | 5.538991 | 0        | 0        |
| CACNA1S      | <a href="#">113242563</a> | 46.37871487 | 5.535391 | 1.81E-09 | 2.3E-08  |
| TNNT3        | <a href="#">113243956</a> | 46.08139089 | 5.526112 | 2.97E-09 | 3.6E-08  |
| SRL          | <a href="#">113270854</a> | 46.01555237 | 5.52405  | 1.01E-14 | 3.29E-13 |
| TRIM63       | <a href="#">113268472</a> | 45.79260906 | 5.517043 | 0        | 0        |
| ANKRD39      | <a href="#">113246637</a> | 45.7594282  | 5.515997 | 4.44E-16 | 1.8E-14  |
| LOC113245168 | <a href="#">113245168</a> | 45.70763307 | 5.514363 | 1.18E-11 | 2.29E-10 |
| SMCO1        | <a href="#">113242744</a> | 44.86658752 | 5.48757  | 0        | 0        |
| ZNF750       | <a href="#">113244462</a> | 44.46898638 | 5.474728 | 0        | 0        |
| DDIT4L       | <a href="#">113263108</a> | 44.4514301  | 5.474158 | 2.22E-16 | 9.61E-15 |
| FZD9         | <a href="#">113267800</a> | 44.41040735 | 5.472826 | 8.88E-16 | 3.42E-14 |
| RYR1         | <a href="#">113243259</a> | 44.37972252 | 5.471829 | 8.64E-12 | 1.71E-10 |
| ASB14        | <a href="#">113257003</a> | 44.25144376 | 5.467653 | 0        | 0        |
| FAM131B      | <a href="#">113265526</a> | 44.13575741 | 5.463876 | 0        | 0        |
| JPH1         | <a href="#">113253041</a> | 43.73011459 | 5.450555 | 4.44E-16 | 1.8E-14  |
| TNNI2        | <a href="#">113243913</a> | 43.65286884 | 5.448005 | 3.79E-09 | 4.49E-08 |
| LOC113259203 | <a href="#">113259203</a> | 42.90104953 | 5.422941 | 0        | 0        |
| CLCN1        | <a href="#">113265521</a> | 42.72472791 | 5.416999 | 0        | 0        |
| ATP1A4       | <a href="#">113246653</a> | 42.65090503 | 5.414504 | 0        | 0        |
| SMPX         | <a href="#">113242236</a> | 42.63935178 | 5.414114 | 9.33E-15 | 3.06E-13 |
| KLHL38       | <a href="#">113252751</a> | 42.49717921 | 5.409295 | 0        | 0        |
| CELF3        | <a href="#">113246099</a> | 42.43181449 | 5.407074 | 0        | 0        |
| DOK7         | <a href="#">113245759</a> | 42.28715644 | 5.402148 | 0        | 0        |
| TNNT1        | <a href="#">113247366</a> | 42.24125594 | 5.400581 | 5.14E-09 | 5.94E-08 |
| TTN          | <a href="#">113250712</a> | 41.64228408 | 5.379977 | 1.55E-08 | 1.64E-07 |

|              |                           |             |          |          |          |
|--------------|---------------------------|-------------|----------|----------|----------|
| CACNB1       | <a href="#">113265527</a> | 41.62293541 | 5.379307 | 0        | 0        |
| WNK2         | <a href="#">113270229</a> | 41.44719811 | 5.373203 | 0        | 0        |
| NEURL2       | <a href="#">113258666</a> | 41.24958361 | 5.366308 | 0        | 0        |
| LOC113258625 | <a href="#">113258625</a> | 41.21690834 | 5.365164 | 0        | 0        |
| SYNM         | <a href="#">113263644</a> | 41.05142686 | 5.35936  | 6.88E-15 | 2.3E-13  |
| MYOM2        | <a href="#">113262202</a> | 41.04918401 | 5.359282 | 3.34E-11 | 5.85E-10 |
| SYPL2        | <a href="#">113244926</a> | 40.9467055  | 5.355675 | 1.32E-14 | 4.24E-13 |
| ALPK3        | <a href="#">113263572</a> | 40.67954301 | 5.346232 | 0        | 0        |
| CAMK2A       | <a href="#">113263946</a> | 40.46513054 | 5.338607 | 0        | 0        |
| COL2A1       | <a href="#">113257484</a> | 40.31740983 | 5.333331 | 8.28E-11 | 1.36E-09 |
| SPEG         | <a href="#">113250425</a> | 40.26843062 | 5.331577 | 2.66E-15 | 9.48E-14 |
| CKMT2        | <a href="#">113255151</a> | 39.89026539 | 5.317965 | 7.05E-12 | 1.41E-10 |
| LOC113246045 | <a href="#">113246045</a> | 39.86346626 | 5.316995 | 4.81E-08 | 4.7E-07  |
| RNF207       | <a href="#">113270576</a> | 39.80858689 | 5.315008 | 0        | 0        |
| CAND2        | <a href="#">113257195</a> | 39.57646199 | 5.306571 | 0        | 0        |
| RRAD         | <a href="#">113252338</a> | 38.8853795  | 5.281156 | 0        | 0        |
| LOC113249987 | <a href="#">113249987</a> | 38.88048808 | 5.280974 | 1.79E-12 | 4.04E-11 |
| LOC113245998 | <a href="#">113245998</a> | 38.81880449 | 5.278684 | 8.2E-08  | 7.7E-07  |
| SRPK3        | <a href="#">113247839</a> | 38.80569974 | 5.278197 | 0        | 0        |
| ART3         | <a href="#">113263253</a> | 38.47364383 | 5.265799 | 0        | 0        |
| TCAP         | <a href="#">113265517</a> | 37.9636024  | 5.246545 | 9.42E-09 | 1.04E-07 |
| HSPB8        | <a href="#">113267026</a> | 37.6778652  | 5.235645 | 0        | 0        |
| ADSSL1       | <a href="#">113267196</a> | 37.35381896 | 5.223184 | 0        | 0        |
| STAC3        | <a href="#">113256388</a> | 37.20360801 | 5.217371 | 1.11E-16 | 4.96E-15 |
| TMEM266      | <a href="#">113248086</a> | 37.06915228 | 5.212147 | 0        | 0        |
| TPD52L1      | <a href="#">113259410</a> | 37.0230225  | 5.210351 | 0        | 0        |
| HRC          | <a href="#">113243313</a> | 36.89827164 | 5.205481 | 0        | 0        |
| MYOZ1        | <a href="#">113259184</a> | 36.821773   | 5.202487 | 3.03E-08 | 3.06E-07 |

|              |                           |             |          |          |          |
|--------------|---------------------------|-------------|----------|----------|----------|
| BVES         | <a href="#">113264788</a> | 36.3697476  | 5.184667 | 0        | 0        |
| PGAM2        | <a href="#">113257974</a> | 36.26968124 | 5.180692 | 1.64E-08 | 1.74E-07 |
| AKAP6        | <a href="#">113266112</a> | 36.06004005 | 5.172329 | 0        | 0        |
| TACC2        | <a href="#">113252016</a> | 36.03971259 | 5.171516 | 0        | 0        |
| CDNF         | <a href="#">113241393</a> | 36.00418426 | 5.170093 | 0        | 0        |
| AMIGO1       | <a href="#">113244923</a> | 35.64969463 | 5.155818 | 0        | 0        |
| ACTN2        | <a href="#">113258941</a> | 35.60800534 | 5.15413  | 9.5E-08  | 8.77E-07 |
| MAPT         | <a href="#">113265313</a> | 35.22268668 | 5.138433 | 0        | 0        |
| ATP2A1       | <a href="#">113267625</a> | 35.03077308 | 5.130551 | 2.38E-09 | 2.96E-08 |
| USP2         | <a href="#">113259958</a> | 33.7646639  | 5.077442 | 0        | 0        |
| SCN1B        | <a href="#">113244832</a> | 33.68380644 | 5.073983 | 0        | 0        |
| LOC113244095 | <a href="#">113244095</a> | 33.46561561 | 5.064608 | 0        | 0        |
| MLIP         | <a href="#">113261174</a> | 33.40419591 | 5.061957 | 0        | 0        |
| FLNC         | <a href="#">113263925</a> | 32.90037977 | 5.040032 | 4.25E-12 | 8.87E-11 |
| DUSP27       | <a href="#">113262889</a> | 32.57068491 | 5.025502 | 1.67E-15 | 6.22E-14 |
| AQP4         | <a href="#">113253308</a> | 32.5643528  | 5.025222 | 0        | 0        |
| USP13        | <a href="#">113254700</a> | 32.45219379 | 5.020244 | 0        | 0        |
| NR4A1        | <a href="#">113257593</a> | 32.40313141 | 5.018061 | 0        | 0        |
| HOMER1       | <a href="#">113255168</a> | 32.38386424 | 5.017203 | 0        | 0        |
| MYH7B        | <a href="#">113258523</a> | 32.35298451 | 5.015827 | 0        | 0        |
| ZNF280B      | <a href="#">113248736</a> | 32.17944428 | 5.008068 | 0        | 0        |
| NT5DC3       | <a href="#">113256072</a> | 32.12080879 | 5.005436 | 0        | 0        |
| TMEM52       | <a href="#">113270703</a> | 31.69317083 | 4.9861   | 1.11E-16 | 4.96E-15 |
| NEXN         | <a href="#">113254499</a> | 31.31236649 | 4.968661 | 0        | 0        |
| ARPP21       | <a href="#">113253764</a> | 31.29037174 | 4.967647 | 0        | 0        |
| LDB3         | <a href="#">113259245</a> | 31.27808857 | 4.96708  | 5.19E-12 | 1.07E-10 |
| FAM184B      | <a href="#">113266728</a> | 30.97639081 | 4.953097 | 0        | 0        |
| PEBP4        | <a href="#">113269994</a> | 30.85490605 | 4.947428 | 3.1E-11  | 5.48E-10 |

|              |                           |             |          |          |          |
|--------------|---------------------------|-------------|----------|----------|----------|
| FITM1        | <a href="#">113246014</a> | 30.65653324 | 4.938123 | 0        | 0        |
| CA14         | <a href="#">113246183</a> | 30.52356431 | 4.931852 | 0        | 0        |
| PLCD4        | <a href="#">113250452</a> | 30.32375002 | 4.922376 | 0        | 0        |
| KBTBD12      | <a href="#">113257266</a> | 29.96916664 | 4.905407 | 0        | 0        |
| MACROD1      | <a href="#">113244190</a> | 29.70707643 | 4.892735 | 0        | 0        |
| ENO3         | <a href="#">113271065</a> | 29.00465007 | 4.858212 | 1.2E-09  | 1.57E-08 |
| PARM1        | <a href="#">113263269</a> | 28.60536947 | 4.838214 | 0        | 0        |
| HS3ST5       | <a href="#">113264706</a> | 28.37382588 | 4.826489 | 7.88E-15 | 2.63E-13 |
| LOC113250506 | <a href="#">113250506</a> | 28.32298524 | 4.823901 | 0        | 0        |
| FRMD1        | <a href="#">113247120</a> | 28.22204102 | 4.81875  | 1.22E-12 | 2.82E-11 |
| LOC113249648 | <a href="#">113249648</a> | 28.05044398 | 4.809952 | 1.41E-14 | 4.49E-13 |
| TPM1         | <a href="#">113269709</a> | 27.90294004 | 4.802345 | 1.34E-09 | 1.76E-08 |
| PLPP7        | <a href="#">113266530</a> | 27.68561416 | 4.791065 | 0        | 0        |
| LRRC14B      | <a href="#">113260767</a> | 27.52108054 | 4.782465 | 0        | 0        |
| NEURL1       | <a href="#">113251895</a> | 27.49336005 | 4.781011 | 0        | 0        |
| RAPSN        | <a href="#">113264883</a> | 27.48452835 | 4.780548 | 0        | 0        |
| SLC38A4      | <a href="#">113257697</a> | 27.39447589 | 4.775813 | 0        | 0        |
| SYNPO2       | <a href="#">113255608</a> | 27.34687177 | 4.773304 | 2.22E-16 | 9.61E-15 |
| CPT1B        | <a href="#">113241597</a> | 27.23123715 | 4.767191 | 0        | 0        |
| LMCD1        | <a href="#">113257123</a> | 27.11784215 | 4.76117  | 0        | 0        |
| MAPK12       | <a href="#">113241615</a> | 26.77943207 | 4.743053 | 0        | 0        |
| UBE2QL1      | <a href="#">113260707</a> | 26.75625991 | 4.741805 | 0        | 0        |
| ZNF385B      | <a href="#">113250707</a> | 26.75452918 | 4.741711 | 1.17E-13 | 3.22E-12 |
| FGFR4        | <a href="#">113264137</a> | 26.74584798 | 4.741243 | 7.77E-16 | 3.01E-14 |
| DNAJB5       | <a href="#">113260494</a> | 26.73840321 | 4.740841 | 0        | 0        |
| ADCY2        | <a href="#">113260807</a> | 26.70479146 | 4.739027 | 4.15E-14 | 1.23E-12 |
| LOC113256824 | <a href="#">113256824</a> | 26.30841318 | 4.717452 | 0        | 0        |
| FBXO32       | <a href="#">113252752</a> | 26.24864986 | 4.714171 | 6.66E-16 | 2.62E-14 |

|              |                           |             |          |          |          |
|--------------|---------------------------|-------------|----------|----------|----------|
| TMEM182      | <a href="#">113247490</a> | 26.20828617 | 4.711951 | 0        | 0        |
| SLC38A3      | <a href="#">113256899</a> | 26.17913364 | 4.710345 | 2.55E-15 | 9.16E-14 |
| LOC113249041 | <a href="#">113249041</a> | 26.14846854 | 4.708655 | 0        | 0        |
| CA3          | <a href="#">113252987</a> | 26.11258226 | 4.706673 | 1.61E-07 | 1.43E-06 |
| LOC113240972 | <a href="#">113240972</a> | 25.95515931 | 4.697949 | 9.29E-11 | 1.51E-09 |
| MUSTN1       | <a href="#">113256971</a> | 25.65016785 | 4.680896 | 0        | 0        |
| FRZB         | <a href="#">113250693</a> | 25.60900751 | 4.678579 | 0        | 0        |
| NT5C1A       | <a href="#">113268245</a> | 25.57782522 | 4.676822 | 0        | 0        |
| TMEM145      | <a href="#">113243519</a> | 25.47471501 | 4.670994 | 1.44E-15 | 5.4E-14  |
| LOC113271210 | <a href="#">113271210</a> | 25.42769363 | 4.668329 | 7.66E-13 | 1.85E-11 |
| LINGO4       | <a href="#">113246192</a> | 25.38848755 | 4.666103 | 1.47E-14 | 4.65E-13 |
| MAMSTR       | <a href="#">113243335</a> | 25.33575536 | 4.663103 | 0        | 0        |
| RTN2         | <a href="#">113243425</a> | 25.31319365 | 4.661818 | 0        | 0        |
| GAMT         | <a href="#">113242729</a> | 25.11104276 | 4.65025  | 0        | 0        |
| PLIN5        | <a href="#">113242843</a> | 24.76669567 | 4.630329 | 0        | 0        |
| MYLK4        | <a href="#">113264229</a> | 24.33180296 | 4.604771 | 2.23E-11 | 4.09E-10 |
| KLHL31       | <a href="#">113261176</a> | 24.22878428 | 4.59865  | 0        | 0        |
| SPATA4       | <a href="#">113262018</a> | 24.22749865 | 4.598574 | 9.77E-15 | 3.19E-13 |
| TBX1         | <a href="#">113245945</a> | 23.90696508 | 4.579359 | 1.13E-12 | 2.63E-11 |
| ANO2         | <a href="#">113258097</a> | 23.8441421  | 4.575563 | 2.84E-14 | 8.7E-13  |
| SEMA6C       | <a href="#">113246217</a> | 23.74040629 | 4.569273 | 0        | 0        |
| PPP1R3C      | <a href="#">113243160</a> | 23.46197434 | 4.552253 | 0        | 0        |
| RXRG         | <a href="#">113268688</a> | 23.23034621 | 4.537939 | 0        | 0        |
| CASZ1        | <a href="#">113270517</a> | 23.1791052  | 4.534753 | 0        | 0        |
| MYBPC2       | <a href="#">113247311</a> | 23.1002527  | 4.529837 | 1.23E-06 | 9.17E-06 |
| SLC25A4      | <a href="#">113262270</a> | 23.0901461  | 4.529205 | 3.48E-10 | 5.12E-09 |
| LSMEM1       | <a href="#">113263014</a> | 22.99534925 | 4.52327  | 0        | 0        |
| LOC113256403 | <a href="#">113256403</a> | 22.96196201 | 4.521174 | 4.66E-15 | 1.61E-13 |

|              |                           |             |          |          |          |
|--------------|---------------------------|-------------|----------|----------|----------|
| LOC113249473 | <a href="#">113249473</a> | 22.65100354 | 4.501503 | 5.02E-12 | 1.03E-10 |
| HOMER2       | <a href="#">113263748</a> | 22.62184702 | 4.499645 | 0        | 0        |
| SIX4         | <a href="#">113242404</a> | 22.55328048 | 4.495265 | 0        | 0        |
| RORC         | <a href="#">113246193</a> | 22.39434287 | 4.485062 | 0        | 0        |
| MN1          | <a href="#">113244996</a> | 22.24194643 | 4.475211 | 0        | 0        |
| BIN1         | <a href="#">113263478</a> | 22.0956411  | 4.46569  | 6.11E-15 | 2.07E-13 |
| DMPK         | <a href="#">113243415</a> | 21.88865462 | 4.452111 | 0        | 0        |
| MYOM1        | <a href="#">113253248</a> | 21.6244106  | 4.434589 | 7.35E-10 | 1.01E-08 |
| PITX1        | <a href="#">113261483</a> | 21.61580757 | 4.434015 | 5.24E-14 | 1.53E-12 |
| FAM160A1     | <a href="#">113255755</a> | 21.60266063 | 4.433137 | 0        | 0        |
| MSS51        | <a href="#">113259180</a> | 21.44166763 | 4.422345 | 0        | 0        |
| LRRN1        | <a href="#">113257105</a> | 21.38919151 | 4.41881  | 0        | 0        |
| ASB4         | <a href="#">113260356</a> | 21.15941066 | 4.403228 | 2.81E-13 | 7.25E-12 |
| FSD2         | <a href="#">113263745</a> | 21.0919981  | 4.398624 | 0        | 0        |
| FRMD3        | <a href="#">113269816</a> | 21.09151013 | 4.39859  | 0        | 0        |
| CNKSRI       | <a href="#">113268466</a> | 21.08204796 | 4.397943 | 0        | 0        |
| LOC113248033 | <a href="#">113248033</a> | 21.04991201 | 4.395742 | 0        | 0        |
| SCN3B        | <a href="#">113259926</a> | 20.73488041 | 4.373988 | 0        | 0        |
| RCAN2        | <a href="#">113261236</a> | 20.72692022 | 4.373434 | 0        | 0        |
| COQ8A        | <a href="#">113262935</a> | 20.51400838 | 4.358538 | 1.97E-09 | 2.49E-08 |
| YBX3         | <a href="#">113257886</a> | 19.9617992  | 4.31917  | 9.26E-09 | 1.02E-07 |
| FHL1         | <a href="#">113241866</a> | 19.64215401 | 4.295881 | 3.61E-08 | 3.61E-07 |
| PPP1R14C     | <a href="#">113259556</a> | 19.58049165 | 4.291345 | 0        | 0        |
| CASTOR2      | <a href="#">113267765</a> | 19.54017616 | 4.288372 | 0        | 0        |
| MTLN         | <a href="#">113268093</a> | 19.52426758 | 4.287197 | 0        | 0        |
| DPYSL5       | <a href="#">113270914</a> | 19.16217998 | 4.26019  | 1.71E-11 | 3.2E-10  |
| SLCO5A1      | <a href="#">113253069</a> | 18.97780146 | 4.246241 | 3.48E-12 | 7.37E-11 |
| GJA9         | <a href="#">113268256</a> | 18.7374123  | 4.22785  | 0        | 0        |

|              |                           |             |          |          |          |
|--------------|---------------------------|-------------|----------|----------|----------|
| COQ10A       | <a href="#">113256427</a> | 18.7313686  | 4.227384 | 0        | 0        |
| LOC113247381 | <a href="#">113247381</a> | 18.7265868  | 4.227016 | 0        | 0        |
| USP28        | <a href="#">113260038</a> | 18.54570303 | 4.213013 | 0        | 0        |
| LOC113249039 | <a href="#">113249039</a> | 18.48781892 | 4.208503 | 1.04E-09 | 1.39E-08 |
| DOK5         | <a href="#">113258743</a> | 18.35010911 | 4.197717 | 0        | 0        |
| FXYD1        | <a href="#">113244833</a> | 18.33042969 | 4.196169 | 1.11E-16 | 4.96E-15 |
| RASL10B      | <a href="#">113268955</a> | 18.1987292  | 4.185766 | 5.69E-13 | 1.4E-11  |
| EXPH5        | <a href="#">113260094</a> | 18.05460408 | 4.174295 | 4.44E-16 | 1.8E-14  |
| STRIP2       | <a href="#">113264076</a> | 18.03375495 | 4.172628 | 0        | 0        |
| ANKRD34A     | <a href="#">113247786</a> | 18.02393441 | 4.171842 | 0        | 0        |
| LOC113244847 | <a href="#">113244847</a> | 18.01792832 | 4.171361 | 0        | 0        |
| PPM1J        | <a href="#">113244419</a> | 17.92361364 | 4.16379  | 0        | 0        |
| GAPDH        | <a href="#">113257977</a> | 17.87975067 | 4.160255 | 4.74E-08 | 4.64E-07 |
| SPATA20      | <a href="#">113265626</a> | 17.81435299 | 4.154968 | 0        | 0        |
| RRAGD        | <a href="#">113264828</a> | 17.75163319 | 4.14988  | 0        | 0        |
| ALDOA        | <a href="#">113267652</a> | 17.74300317 | 4.149178 | 9.13E-08 | 8.49E-07 |
| KCNJ3        | <a href="#">113250873</a> | 17.697903   | 4.145507 | 3.97E-10 | 5.76E-09 |
| DDO          | <a href="#">113264740</a> | 17.64393071 | 4.1411   | 7.18E-13 | 1.75E-11 |
| PDZRN3       | <a href="#">113257089</a> | 17.55555216 | 4.133855 | 0        | 0        |
| TTC9         | <a href="#">113270381</a> | 17.48289143 | 4.127872 | 0        | 0        |
| C1QTNF4      | <a href="#">113264951</a> | 17.4141836  | 4.122191 | 1.33E-15 | 5.03E-14 |
| TECTB        | <a href="#">113251934</a> | 17.36317437 | 4.117959 | 1.38E-07 | 1.24E-06 |
| GPT2         | <a href="#">113252205</a> | 17.24461981 | 4.108074 | 9.99E-16 | 3.81E-14 |
| PROX1        | <a href="#">113262688</a> | 17.11889221 | 4.097517 | 0        | 0        |
| FHL3         | <a href="#">113268262</a> | 17.11505218 | 4.097194 | 5.77E-15 | 1.97E-13 |
| PEG3         | <a href="#">113248914</a> | 16.9987044  | 4.087353 | 0        | 0        |
| LOC113246316 | <a href="#">113246316</a> | 16.94831965 | 4.08307  | 0        | 0        |
| TEAD4        | <a href="#">113258014</a> | 16.82766745 | 4.072763 | 0        | 0        |

|              |                           |             |          |          |          |
|--------------|---------------------------|-------------|----------|----------|----------|
| ANXA9        | <a href="#">113246188</a> | 16.6508333  | 4.057522 | 1.73E-11 | 3.23E-10 |
| DLG2         | <a href="#">113269385</a> | 16.56349119 | 4.049935 | 1.53E-10 | 2.38E-09 |
| LDHD         | <a href="#">113252492</a> | 16.52084869 | 4.046216 | 0        | 0        |
| LOC113271213 | <a href="#">113271213</a> | 16.46472008 | 4.041306 | 0.00011  | 0.000546 |
| PACSIN3      | <a href="#">113264972</a> | 16.45353871 | 4.040326 | 0        | 0        |
| ESRRB        | <a href="#">113270307</a> | 16.4362126  | 4.038806 | 8.61E-12 | 1.71E-10 |
| PROB1        | <a href="#">113261803</a> | 16.41631398 | 4.037058 | 0        | 0        |
| LOC113249819 | <a href="#">113249819</a> | 16.28588112 | 4.02555  | 2.22E-16 | 9.61E-15 |
| CHCHD10      | <a href="#">113247085</a> | 16.21519824 | 4.019275 | 1.4E-11  | 2.65E-10 |
| EGLN3        | <a href="#">113266114</a> | 16.16236981 | 4.014567 | 0        | 0        |
| ABLIM2       | <a href="#">113245677</a> | 16.13580029 | 4.012193 | 0        | 0        |
| ADAMTSL5     | <a href="#">113242739</a> | 16.10689681 | 4.009607 | 0        | 0        |
| DTNA         | <a href="#">113253331</a> | 16.01166107 | 4.001051 | 0        | 0        |
| CRYAB        | <a href="#">113260065</a> | 15.94211325 | 3.994771 | 3.41E-13 | 8.7E-12  |
| KIAA1257     | <a href="#">113257240</a> | 15.90669646 | 3.991562 | 2.25E-09 | 2.82E-08 |
| VWA3B        | <a href="#">113246750</a> | 15.84253162 | 3.985731 | 1.23E-12 | 2.85E-11 |
| PFKM         | <a href="#">113257678</a> | 15.7475364  | 3.977054 | 3.41E-07 | 2.83E-06 |
| SYNC         | <a href="#">113268345</a> | 15.6729558  | 3.970205 | 1.65E-14 | 5.22E-13 |
| OSBPL6       | <a href="#">113250717</a> | 15.42269183 | 3.946983 | 0        | 0        |
| SLC25A12     | <a href="#">113250777</a> | 15.3417034  | 3.939387 | 1.89E-15 | 6.93E-14 |
| ME3          | <a href="#">113269404</a> | 15.25142108 | 3.930872 | 1.22E-15 | 4.64E-14 |
| CCDC7        | <a href="#">113244234</a> | 15.24029551 | 3.929819 | 1.06E-10 | 1.7E-09  |
| DKK2         | <a href="#">113255536</a> | 15.22584179 | 3.92845  | 0        | 0        |
| TMEM38A      | <a href="#">113256659</a> | 15.20050996 | 3.926048 | 1.16E-09 | 1.54E-08 |
| METTL24      | <a href="#">113264743</a> | 15.17689988 | 3.923805 | 1.69E-13 | 4.54E-12 |
| CDHR3        | <a href="#">113258697</a> | 15.14998193 | 3.921244 | 8.89E-11 | 1.45E-09 |
| SCHIP1       | <a href="#">113254128</a> | 15.13691433 | 3.919999 | 0        | 0        |
| PCBP4        | <a href="#">113256933</a> | 15.03355272 | 3.910114 | 0        | 0        |

|              |                           |             |          |          |          |
|--------------|---------------------------|-------------|----------|----------|----------|
| GPR157       | <a href="#">113270672</a> | 14.90577329 | 3.897799 | 0        | 0        |
| MIEF2        | <a href="#">113271288</a> | 14.74841767 | 3.882488 | 0        | 0        |
| MUM1L1       | <a href="#">113241216</a> | 14.73324515 | 3.881003 | 0        | 0        |
| LIPT2        | <a href="#">113269312</a> | 14.70946205 | 3.878673 | 0        | 0        |
| NR4A3        | <a href="#">113260396</a> | 14.60403308 | 3.868295 | 6.48E-08 | 6.21E-07 |
| UCHL1        | <a href="#">113262438</a> | 14.55584358 | 3.863527 | 0        | 0        |
| PRKCQ        | <a href="#">113241147</a> | 14.5446472  | 3.862416 | 3.15E-12 | 6.74E-11 |
| ZIC1         | <a href="#">113254037</a> | 14.44842315 | 3.85284  | 4.83E-08 | 4.72E-07 |
| COBL         | <a href="#">113257504</a> | 14.39894333 | 3.847891 | 3.59E-13 | 9.08E-12 |
| SMKR1        | <a href="#">113264091</a> | 14.34683901 | 3.842661 | 1.53E-09 | 1.97E-08 |
| TCF15        | <a href="#">113258440</a> | 14.28958261 | 3.836892 | 3.96E-10 | 5.75E-09 |
| BHLHE41      | <a href="#">113257783</a> | 14.27131756 | 3.835047 | 0        | 0        |
| LMOD1        | <a href="#">113242545</a> | 14.25217    | 3.83311  | 0        | 0        |
| UBE2D1       | <a href="#">113259064</a> | 14.25080625 | 3.832972 | 0        | 0        |
| REEP1        | <a href="#">113268227</a> | 14.20607286 | 3.828436 | 0        | 0        |
| FEM1A        | <a href="#">113242841</a> | 14.18295391 | 3.826086 | 2.06E-11 | 3.8E-10  |
| LOC113270558 | <a href="#">113270558</a> | 14.03606665 | 3.811067 | 6.44E-10 | 8.96E-09 |
| B3GALT1      | <a href="#">113250816</a> | 13.88638738 | 3.795599 | 4.35E-11 | 7.45E-10 |
| PPP1R3G      | <a href="#">113264416</a> | 13.82141448 | 3.788833 | 3.33E-16 | 1.39E-14 |
| LOC113261185 | <a href="#">113261185</a> | 13.76270211 | 3.782692 | 8.39E-11 | 1.37E-09 |
| ACACB        | <a href="#">113267083</a> | 13.73411113 | 3.779692 | 0        | 0        |
| DBNDD2       | <a href="#">113258650</a> | 13.69173045 | 3.775233 | 0        | 0        |
| GOT2         | <a href="#">113252314</a> | 13.60095164 | 3.765636 | 4.19E-10 | 6.05E-09 |
| RNF157       | <a href="#">113244674</a> | 13.56588427 | 3.761911 | 0        | 0        |
| MRLN         | <a href="#">113259072</a> | 13.55538021 | 3.760794 | 3.06E-11 | 5.42E-10 |
| CDIP1        | <a href="#">113270847</a> | 13.27849385 | 3.73102  | 0        | 0        |
| LIN7B        | <a href="#">113243317</a> | 13.21609431 | 3.724224 | 8.66E-15 | 2.86E-13 |
| MYO5C        | <a href="#">113269636</a> | 13.07779045 | 3.709047 | 5.55E-16 | 2.21E-14 |

|              |                           |             |          |          |          |
|--------------|---------------------------|-------------|----------|----------|----------|
| ITGB1BP2     | <a href="#">113245616</a> | 12.98617834 | 3.698905 | 8.49E-14 | 2.4E-12  |
| AHCYL2       | <a href="#">113264044</a> | 12.96776796 | 3.696858 | 0        | 0        |
| LOC113245320 | <a href="#">113245320</a> | 12.95844522 | 3.695821 | 2.13E-09 | 2.68E-08 |
| GTF2IRD1     | <a href="#">113267774</a> | 12.56704739 | 3.651574 | 1.11E-16 | 4.96E-15 |
| CNN1         | <a href="#">113243031</a> | 12.5517857  | 3.649821 | 2.75E-10 | 4.12E-09 |
| TRIM7        | <a href="#">113261531</a> | 12.53947688 | 3.648405 | 1.11E-16 | 4.96E-15 |
| DUSP3        | <a href="#">113265375</a> | 12.50579162 | 3.644524 | 0        | 0        |
| HSPB6        | <a href="#">113244835</a> | 12.40419367 | 3.632756 | 2.56E-06 | 1.81E-05 |
| FAM161B      | <a href="#">113270340</a> | 12.31762679 | 3.622652 | 7.77E-16 | 3.01E-14 |
| LRRC20       | <a href="#">113259140</a> | 12.2563838  | 3.615461 | 0        | 0        |
| ATP2A2       | <a href="#">113266954</a> | 12.25072286 | 3.614795 | 7.62E-07 | 5.94E-06 |
| ZDBF2        | <a href="#">113250538</a> | 12.117838   | 3.59906  | 4.66E-15 | 1.61E-13 |
| CUNH14orf28  | <a href="#">113266169</a> | 12.10996332 | 3.598123 | 1.04E-12 | 2.45E-11 |
| RNF152       | <a href="#">113253477</a> | 12.05352391 | 3.591383 | 0        | 0        |
| PPP2R3A      | <a href="#">113253964</a> | 12.02826709 | 3.588357 | 0        | 0        |
| PTGES3L      | <a href="#">113265392</a> | 12.02415982 | 3.587864 | 6.08E-10 | 8.48E-09 |
| SERINC2      | <a href="#">113268384</a> | 12.0160875  | 3.586895 | 5.75E-14 | 1.67E-12 |
| PDLIM5       | <a href="#">113263133</a> | 11.72741423 | 3.551813 | 4.02E-10 | 5.83E-09 |
| CUNH19orf47  | <a href="#">113243571</a> | 11.69516451 | 3.54784  | 0        | 0        |
| DCUN1D2      | <a href="#">113247566</a> | 11.64045588 | 3.541076 | 0        | 0        |
| SYNPO        | <a href="#">113263952</a> | 11.59543298 | 3.535485 | 1.66E-12 | 3.79E-11 |
| ZDHHC2       | <a href="#">113262160</a> | 11.47459919 | 3.520372 | 0        | 0        |
| GRIP2        | <a href="#">113257219</a> | 11.41523172 | 3.512888 | 3.33E-16 | 1.39E-14 |
| PLCL1        | <a href="#">113248092</a> | 11.40242399 | 3.511269 | 2.14E-13 | 5.68E-12 |
| CTNNA3       | <a href="#">113259098</a> | 11.39731699 | 3.510622 | 6.96E-09 | 7.83E-08 |
| DYRK1B       | <a href="#">113243579</a> | 11.25412422 | 3.492382 | 1.88E-14 | 5.9E-13  |
| TMEM117      | <a href="#">113257713</a> | 11.23870842 | 3.490404 | 1.33E-15 | 5.03E-14 |
| HACD1        | <a href="#">113241365</a> | 11.22898628 | 3.489156 | 2.44E-15 | 8.78E-14 |

|              |                           |             |          |          |          |
|--------------|---------------------------|-------------|----------|----------|----------|
| LOC113250050 | <a href="#">113250050</a> | 11.22170777 | 3.48822  | 2.64E-10 | 3.96E-09 |
| TBX15        | <a href="#">113244365</a> | 11.18353041 | 3.483304 | 5.66E-12 | 1.15E-10 |
| CMBL         | <a href="#">113260816</a> | 11.17996016 | 3.482843 | 1.62E-09 | 2.08E-08 |
| TCEA3        | <a href="#">113268525</a> | 11.07809052 | 3.469637 | 6.64E-12 | 1.34E-10 |
| MPZ          | <a href="#">113246642</a> | 11.06930892 | 3.468493 | 6.56E-09 | 7.43E-08 |
| GDF1         | <a href="#">113256734</a> | 11.060868   | 3.467393 | 8.9E-10  | 1.2E-08  |
| LOC113248248 | <a href="#">113248248</a> | 11.04713409 | 3.4656   | 3.64E-08 | 3.63E-07 |
| ZNF703       | <a href="#">113262107</a> | 11.02916963 | 3.463252 | 7.77E-16 | 3.01E-14 |
| NMB          | <a href="#">113263730</a> | 11.01290961 | 3.461124 | 3.38E-09 | 4.06E-08 |
| FILIP1       | <a href="#">113261108</a> | 10.98522993 | 3.457493 | 3.33E-16 | 1.39E-14 |
| KIAA0408     | <a href="#">113259429</a> | 10.98067464 | 3.456895 | 1.69E-11 | 3.17E-10 |
| ACVR2B       | <a href="#">113253788</a> | 10.97933258 | 3.456718 | 9.53E-12 | 1.87E-10 |
| PDE4C        | <a href="#">113256711</a> | 10.96620906 | 3.454993 | 1.57E-11 | 2.95E-10 |
| SH3YL1       | <a href="#">113269154</a> | 10.9577478  | 3.453879 | 3.98E-08 | 3.95E-07 |
| BMPR1B       | <a href="#">113263130</a> | 10.95324581 | 3.453287 | 2.55E-07 | 2.17E-06 |
| TUBA8        | <a href="#">113258067</a> | 10.94874436 | 3.452694 | 8.47E-13 | 2.01E-11 |
| ETV4         | <a href="#">113265377</a> | 10.92904538 | 3.450095 | 1.51E-07 | 1.35E-06 |
| SMARCD3      | <a href="#">113241487</a> | 10.80432786 | 3.433537 | 5.55E-16 | 2.21E-14 |
| XPO4         | <a href="#">113251171</a> | 10.7750516  | 3.429623 | 9.87E-12 | 1.94E-10 |
| BHLHE40      | <a href="#">113257116</a> | 10.73478682 | 3.424222 | 3.57E-13 | 9.06E-12 |
| PGM5         | <a href="#">113270190</a> | 10.7216839  | 3.42246  | 3.44E-15 | 1.21E-13 |
| ATP2B2       | <a href="#">113257169</a> | 10.71931779 | 3.422141 | 6.33E-15 | 2.13E-13 |
| GREB1L       | <a href="#">113253269</a> | 10.62380034 | 3.409228 | 3.9E-14  | 1.16E-12 |
| NOL3         | <a href="#">113252357</a> | 10.59975256 | 3.405959 | 2.22E-11 | 4.06E-10 |
| CACNA2D1     | <a href="#">113259255</a> | 10.57947992 | 3.403197 | 0        | 0        |
| ZNF106       | <a href="#">113241988</a> | 10.55174875 | 3.39941  | 4.37E-07 | 3.56E-06 |
| LCN2         | <a href="#">113266453</a> | 10.54388889 | 3.398335 | 2.07E-08 | 2.15E-07 |
| LOC113263090 | <a href="#">113263090</a> | 10.51515862 | 3.394399 | 7.77E-16 | 3.01E-14 |

|              |                           |             |          |          |          |
|--------------|---------------------------|-------------|----------|----------|----------|
| PTGR2        | <a href="#">113270354</a> | 10.51162854 | 3.393914 | 0        | 0        |
| SLC26A10     | <a href="#">113256369</a> | 10.50929149 | 3.393594 | 3.36E-10 | 4.94E-09 |
| SRCIN1       | <a href="#">113265547</a> | 10.50517033 | 3.393028 | 5.19E-09 | 5.99E-08 |
| HCN2         | <a href="#">113242650</a> | 10.41753446 | 3.380942 | 2.66E-07 | 2.25E-06 |
| SH3RF2       | <a href="#">113255347</a> | 10.28894803 | 3.363024 | 5.8E-10  | 8.15E-09 |
| CAMK2B       | <a href="#">113257849</a> | 10.25905152 | 3.358825 | 1.99E-13 | 5.3E-12  |
| ACAN         | <a href="#">113263578</a> | 10.21243271 | 3.352255 | 0.003789 | 0.012239 |
| MCRIP2       | <a href="#">113245384</a> | 10.20159817 | 3.350723 | 1.21E-13 | 3.32E-12 |
| FOXO6        | <a href="#">113254226</a> | 10.15664289 | 3.344352 | 9.15E-08 | 8.5E-07  |
| SPATA9       | <a href="#">113255079</a> | 10.13032418 | 3.340608 | 6.76E-09 | 7.63E-08 |
| WNT9A        | <a href="#">113247507</a> | 10.12202143 | 3.339426 | 2.99E-10 | 4.43E-09 |
| HSPB2        | <a href="#">113260064</a> | 10.1149035  | 3.338411 | 3.33E-16 | 1.39E-14 |
| PRADC1       | <a href="#">113244005</a> | 10.07854257 | 3.333215 | 1.11E-16 | 4.96E-15 |
| FZD7         | <a href="#">113250581</a> | 9.994844568 | 3.321184 | 3.5E-14  | 1.05E-12 |
| AMOT         | <a href="#">113241247</a> | 9.966833011 | 3.317135 | 0        | 0        |
| NR1D1        | <a href="#">113265501</a> | 9.884964804 | 3.305236 | 1.21E-10 | 1.91E-09 |
| DDR1         | <a href="#">113264347</a> | 9.876540156 | 3.304006 | 0        | 0        |
| CACNA2D3     | <a href="#">113256988</a> | 9.871773778 | 3.303309 | 2.48E-07 | 2.11E-06 |
| LOC113261724 | <a href="#">113261724</a> | 9.831799007 | 3.297455 | 5.6E-10  | 7.88E-09 |
| CCDC9B       | <a href="#">113242035</a> | 9.765677398 | 3.28772  | 0        | 0        |
| RASSF10      | <a href="#">113246248</a> | 9.732046886 | 3.282743 | 1.32E-08 | 1.42E-07 |
| SV2B         | <a href="#">113263668</a> | 9.70500917  | 3.27873  | 5.38E-09 | 6.2E-08  |
| MSANTD3      | <a href="#">113260390</a> | 9.681862045 | 3.275285 | 1.07E-13 | 2.97E-12 |
| RBM20        | <a href="#">113251925</a> | 9.626785212 | 3.267054 | 1.18E-07 | 1.07E-06 |
| RNF43        | <a href="#">113268873</a> | 9.581781082 | 3.260294 | 3.26E-07 | 2.71E-06 |
| TSPAN13      | <a href="#">113261026</a> | 9.499136062 | 3.247796 | 1.17E-10 | 1.86E-09 |
| RILP         | <a href="#">113269121</a> | 9.448842459 | 3.240138 | 2.66E-15 | 9.48E-14 |
| TPT1         | <a href="#">113251351</a> | 9.444293601 | 3.239443 | 1.88E-05 | 0.000111 |

|              |                           |             |          |          |          |
|--------------|---------------------------|-------------|----------|----------|----------|
| RASA4B       | <a href="#">113267819</a> | 9.414094691 | 3.234822 | 2.22E-16 | 9.61E-15 |
| PGM1         | <a href="#">113254583</a> | 9.382326542 | 3.229946 | 2.21E-06 | 1.59E-05 |
| SIX1         | <a href="#">113242402</a> | 9.377190578 | 3.229156 | 2.64E-12 | 5.73E-11 |
| PRKAA2       | <a href="#">113254619</a> | 9.330776929 | 3.221997 | 3.17E-09 | 3.83E-08 |
| TEAD1        | <a href="#">113246254</a> | 9.289847632 | 3.215655 | 2.99E-10 | 4.43E-09 |
| ACO2         | <a href="#">113241726</a> | 9.283716664 | 3.214702 | 2.69E-06 | 1.9E-05  |
| CSDC2        | <a href="#">113241725</a> | 9.272291578 | 3.212926 | 8.08E-12 | 1.61E-10 |
| ZNF672       | <a href="#">113261519</a> | 9.267678723 | 3.212208 | 2.22E-15 | 8.07E-14 |
| SLC25A3      | <a href="#">113256113</a> | 9.266978104 | 3.212099 | 1.22E-05 | 7.56E-05 |
| TTYH2        | <a href="#">113265661</a> | 9.258460874 | 3.210772 | 2.69E-13 | 6.95E-12 |
| IRS1         | <a href="#">113250390</a> | 9.251030043 | 3.209614 | 2.66E-15 | 9.48E-14 |
| CRHR2        | <a href="#">113266912</a> | 9.238443667 | 3.20765  | 2.92E-07 | 2.45E-06 |
| SGCD         | <a href="#">113264007</a> | 9.204363624 | 3.202318 | 4.44E-16 | 1.8E-14  |
| LGI1         | <a href="#">113243181</a> | 9.18303199  | 3.198971 | 1.08E-10 | 1.73E-09 |
| KCNQ4        | <a href="#">113254824</a> | 9.171682716 | 3.197186 | 8.65E-10 | 1.17E-08 |
| FSD1L        | <a href="#">113260351</a> | 9.170551517 | 3.197009 | 3.06E-14 | 9.3E-13  |
| FHL2         | <a href="#">113267650</a> | 9.081480323 | 3.182927 | 9.28E-11 | 1.51E-09 |
| CUNH1orf21   | <a href="#">113262743</a> | 9.056619177 | 3.178973 | 4.44E-16 | 1.8E-14  |
| PPEF1        | <a href="#">113242253</a> | 9.053836945 | 3.178529 | 2.08E-09 | 2.63E-08 |
| FHOD3        | <a href="#">113253352</a> | 9.05237135  | 3.178296 | 4.05E-12 | 8.48E-11 |
| ADRA2B       | <a href="#">113241981</a> | 9.036803612 | 3.175813 | 1.53E-08 | 1.63E-07 |
| PPP1R12B     | <a href="#">113242537</a> | 9.020056729 | 3.173137 | 2.75E-11 | 4.91E-10 |
| RETREG1      | <a href="#">113260842</a> | 9.012519237 | 3.17193  | 7.74E-14 | 2.2E-12  |
| FKBP3        | <a href="#">113266176</a> | 8.992312508 | 3.168692 | 3.66E-12 | 7.71E-11 |
| LOC113255514 | <a href="#">113255514</a> | 8.967968476 | 3.164781 | 3.66E-15 | 1.28E-13 |
| YIPF7        | <a href="#">113262453</a> | 8.950401807 | 3.161952 | 1.86E-12 | 4.18E-11 |
| LMO7         | <a href="#">113251426</a> | 8.932152604 | 3.159008 | 6.76E-07 | 5.31E-06 |
| CUNH15orf61  | <a href="#">113240898</a> | 8.928985446 | 3.158496 | 1.28E-10 | 2E-09    |

|              |                           |             |          |          |          |
|--------------|---------------------------|-------------|----------|----------|----------|
| HCFC1R1      | <a href="#">113245424</a> | 8.914780165 | 3.156199 | 5.36E-13 | 1.33E-11 |
| SOX15        | <a href="#">113271164</a> | 8.90907757  | 3.155276 | 1.35E-07 | 1.22E-06 |
| TMEM143      | <a href="#">113243352</a> | 8.853385758 | 3.146229 | 1.13E-10 | 1.81E-09 |
| TM6SF1       | <a href="#">113263753</a> | 8.822274857 | 3.141151 | 6.42E-14 | 1.84E-12 |
| KCNC4        | <a href="#">113244908</a> | 8.795588913 | 3.13678  | 7.57E-11 | 1.25E-09 |
| DYSF         | <a href="#">113244079</a> | 8.783128816 | 3.134735 | 6.12E-10 | 8.53E-09 |
| ANK2         | <a href="#">113255588</a> | 8.780634313 | 3.134325 | 8.33E-08 | 7.81E-07 |
| SLC7A2       | <a href="#">113262158</a> | 8.763167166 | 3.131452 | 3.86E-12 | 8.13E-11 |
| FXR2         | <a href="#">113271143</a> | 8.741395999 | 3.127864 | 1.48E-12 | 3.39E-11 |
| ANKRD37      | <a href="#">113262279</a> | 8.682593823 | 3.118126 | 2.48E-13 | 6.51E-12 |
| SHISA4       | <a href="#">113242547</a> | 8.681483827 | 3.117942 | 4.8E-12  | 9.92E-11 |
| LOC113258058 | <a href="#">113258058</a> | 8.664585418 | 3.115131 | 2.35E-11 | 4.27E-10 |
| GOT1         | <a href="#">113251814</a> | 8.648162536 | 3.112394 | 1.74E-10 | 2.67E-09 |
| EGFLAM       | <a href="#">113260905</a> | 8.62837484  | 3.109089 | 2.58E-08 | 2.63E-07 |
| LOC113266262 | <a href="#">113266262</a> | 8.588886287 | 3.102471 | 6.99E-08 | 6.66E-07 |
| MUSK         | <a href="#">113260327</a> | 8.583255315 | 3.101525 | 2.23E-06 | 1.59E-05 |
| LOC113244886 | <a href="#">113244886</a> | 8.546060679 | 3.09526  | 8.44E-15 | 2.8E-13  |
| RGMA         | <a href="#">113263660</a> | 8.542123035 | 3.094595 | 2.94E-11 | 5.24E-10 |
| FAM13C       | <a href="#">113259068</a> | 8.525994528 | 3.091868 | 2.47E-12 | 5.41E-11 |
| BTBD1        | <a href="#">113263752</a> | 8.49994394  | 3.087453 | 3.68E-10 | 5.39E-09 |
| EPM2A        | <a href="#">113259523</a> | 8.422398817 | 3.074231 | 4.19E-11 | 7.21E-10 |
| LOC113247480 | <a href="#">113247480</a> | 8.397088752 | 3.069889 | 5.62E-08 | 5.43E-07 |
| HOXC10       | <a href="#">113257525</a> | 8.390395348 | 3.068739 | 4.73E-12 | 9.83E-11 |
| SEC14L5      | <a href="#">113270829</a> | 8.383437751 | 3.067542 | 9.27E-11 | 1.51E-09 |
| CUNH6orf163  | <a href="#">113264846</a> | 8.36536706  | 3.064429 | 9.18E-08 | 8.51E-07 |
| SLC9A2       | <a href="#">113247464</a> | 8.356457413 | 3.062891 | 1.9E-06  | 1.38E-05 |
| ADAM22       | <a href="#">113259540</a> | 8.341512078 | 3.060309 | 6.47E-10 | 8.98E-09 |
| LOC113240981 | <a href="#">113240981</a> | 8.339079681 | 3.059888 | 2.85E-07 | 2.4E-06  |

|              |                           |             |          |          |          |
|--------------|---------------------------|-------------|----------|----------|----------|
| ZNF641       | <a href="#">113257676</a> | 8.330182525 | 3.058348 | 1.04E-14 | 3.39E-13 |
| DOCK3        | <a href="#">113256616</a> | 8.325687895 | 3.057569 | 1.6E-06  | 1.17E-05 |
| AK1          | <a href="#">113266444</a> | 8.313787311 | 3.055506 | 1.77E-09 | 2.25E-08 |
| LOC113250796 | <a href="#">113250796</a> | 8.287832843 | 3.050995 | 1.09E-13 | 3.02E-12 |
| EDN2         | <a href="#">113254819</a> | 8.221373809 | 3.039379 | 1.03E-07 | 9.5E-07  |
| GATM         | <a href="#">113269569</a> | 8.175029405 | 3.031224 | 5.54E-06 | 3.7E-05  |
| RAVER2       | <a href="#">113254204</a> | 8.158785787 | 3.028354 | 1.1E-11  | 2.14E-10 |
| PPARGC1A     | <a href="#">113266747</a> | 8.153201459 | 3.027367 | 7.22E-08 | 6.87E-07 |
| ABCC9        | <a href="#">113257803</a> | 8.148223005 | 3.026485 | 1.96E-12 | 4.37E-11 |
| TSPAN7       | <a href="#">113265864</a> | 8.130175216 | 3.023286 | 1.34E-14 | 4.31E-13 |
| HOXC11       | <a href="#">113257526</a> | 8.087732969 | 3.015735 | 2.39E-06 | 1.7E-05  |
| PRKAB2       | <a href="#">113247754</a> | 8.085592179 | 3.015353 | 1.32E-11 | 2.54E-10 |
| LSMEM2       | <a href="#">113256903</a> | 8.056556532 | 3.010163 | 3.44E-12 | 7.31E-11 |
| ATP5MC1      | <a href="#">113265594</a> | 8.033416253 | 3.006014 | 4.95E-09 | 5.77E-08 |
| TLE1         | <a href="#">113269821</a> | 8.007757073 | 3.001398 | 2.25E-14 | 7.04E-13 |
| OBSL1        | <a href="#">113250419</a> | 7.990962875 | 2.998369 | 1.03E-12 | 2.43E-11 |
| LOC113250051 | <a href="#">113250051</a> | 7.990444159 | 2.998276 | 2.18E-08 | 2.25E-07 |
| DNAJC27      | <a href="#">113270614</a> | 7.975546029 | 2.995583 | 1.5E-06  | 1.1E-05  |
| ADAMTS8      | <a href="#">113260177</a> | 7.965984675 | 2.993853 | 0.000184 | 0.000866 |
| RDH13        | <a href="#">113247404</a> | 7.960249498 | 2.992814 | 8.23E-11 | 1.35E-09 |
| AFAP1L1      | <a href="#">113263930</a> | 7.956171556 | 2.992074 | 2.45E-12 | 5.39E-11 |
| KIF1C        | <a href="#">113271057</a> | 7.947784003 | 2.990553 | 4.19E-07 | 3.42E-06 |
| NRXN1        | <a href="#">113245852</a> | 7.935712992 | 2.98836  | 1.09E-06 | 8.24E-06 |
| IDH3A        | <a href="#">113263797</a> | 7.930810514 | 2.987468 | 3.93E-10 | 5.72E-09 |
| SSPN         | <a href="#">113257784</a> | 7.868812915 | 2.976146 | 3.12E-12 | 6.69E-11 |
| FBXO27       | <a href="#">113243597</a> | 7.829969225 | 2.969007 | 1.64E-05 | 9.8E-05  |
| PRUNE2       | <a href="#">113269835</a> | 7.828159551 | 2.968673 | 1.85E-05 | 0.000109 |
| PINK1        | <a href="#">113268560</a> | 7.797582478 | 2.963027 | 4.68E-08 | 4.59E-07 |

|              |                           |             |          |          |          |
|--------------|---------------------------|-------------|----------|----------|----------|
| SCNM1        | <a href="#">113246162</a> | 7.752045284 | 2.954577 | 6.53E-14 | 1.87E-12 |
| COQ9         | <a href="#">113252286</a> | 7.745785269 | 2.953412 | 1.16E-08 | 1.27E-07 |
| CFL2         | <a href="#">113266119</a> | 7.72870623  | 2.950227 | 6.19E-08 | 5.95E-07 |
| PPFIA4       | <a href="#">113242527</a> | 7.712127244 | 2.947129 | 4.69E-07 | 3.79E-06 |
| ACTG2        | <a href="#">113243866</a> | 7.698187319 | 2.944519 | 2.41E-08 | 2.47E-07 |
| LOC113243744 | <a href="#">113243744</a> | 7.682995437 | 2.941669 | 4.68E-07 | 3.79E-06 |
| LOC113261698 | <a href="#">113261698</a> | 7.669830075 | 2.939195 | 2.7E-09  | 3.31E-08 |
| CNKS2        | <a href="#">113242237</a> | 7.65211568  | 2.935859 | 4.14E-07 | 3.4E-06  |
| CCNG1        | <a href="#">113264054</a> | 7.640692952 | 2.933703 | 0.0001   | 0.000503 |
| NDUFS3       | <a href="#">113264954</a> | 7.624990397 | 2.930736 | 2.51E-09 | 3.1E-08  |
| HDAC11       | <a href="#">113257231</a> | 7.618428007 | 2.929493 | 1.53E-12 | 3.48E-11 |
| DUSP8        | <a href="#">113243950</a> | 7.588406797 | 2.923797 | 9.21E-08 | 8.54E-07 |
| SAMD4A       | <a href="#">113242354</a> | 7.581715834 | 2.922524 | 6.22E-15 | 2.1E-13  |
| MME          | <a href="#">113254091</a> | 7.554872214 | 2.917407 | 5.46E-08 | 5.3E-07  |
| FAM174A      | <a href="#">113255038</a> | 7.528820874 | 2.912424 | 8.77E-15 | 2.89E-13 |
| LOC113246689 | <a href="#">113246689</a> | 7.525646323 | 2.911815 | 3.4E-07  | 2.82E-06 |
| RORA         | <a href="#">113269696</a> | 7.517163641 | 2.910188 | 5.29E-09 | 6.1E-08  |
| PDE4D        | <a href="#">113254908</a> | 7.472489246 | 2.901589 | 2.29E-09 | 2.86E-08 |
| LOC113245020 | <a href="#">113245020</a> | 7.418497528 | 2.891127 | 1.39E-08 | 1.49E-07 |
| BAG3         | <a href="#">113251998</a> | 7.409756985 | 2.889426 | 7.71E-13 | 1.85E-11 |
| IPO13        | <a href="#">113254778</a> | 7.400090571 | 2.887543 | 1.21E-10 | 1.92E-09 |
| LOC113252198 | <a href="#">113252198</a> | 7.397482012 | 2.887034 | 5.91E-07 | 4.69E-06 |
| LOC113247479 | <a href="#">113247479</a> | 7.36636027  | 2.880952 | 5.13E-07 | 4.11E-06 |
| LOC113261335 | <a href="#">113261335</a> | 7.348616909 | 2.877473 | 5.48E-08 | 5.31E-07 |
| LOC113253852 | <a href="#">113253852</a> | 7.343596086 | 2.876487 | 2.23E-07 | 1.92E-06 |
| LOC113270677 | <a href="#">113270677</a> | 7.327563657 | 2.873334 | 2.64E-06 | 1.87E-05 |
| SAMD11       | <a href="#">113270658</a> | 7.316012421 | 2.871058 | 3.15E-12 | 6.74E-11 |
| ALDH1A2      | <a href="#">113269676</a> | 7.314981049 | 2.870854 | 1.25E-06 | 9.32E-06 |

|              |                           |             |          |          |          |
|--------------|---------------------------|-------------|----------|----------|----------|
| ZNF853       | <a href="#">113267949</a> | 7.310575234 | 2.869985 | 1.16E-10 | 1.84E-09 |
| LOC113268666 | <a href="#">113268666</a> | 7.252201343 | 2.858419 | 2.13E-11 | 3.9E-10  |
| PTPN3        | <a href="#">113260335</a> | 7.22532788  | 2.853063 | 6.14E-12 | 1.24E-10 |
| PPP3CC       | <a href="#">113270001</a> | 7.202154229 | 2.848428 | 2.3E-12  | 5.07E-11 |
| MLYCD        | <a href="#">113252546</a> | 7.172552624 | 2.842487 | 4.72E-13 | 1.17E-11 |
| CARNS1       | <a href="#">113244030</a> | 7.171515364 | 2.842278 | 1.8E-08  | 1.88E-07 |
| STC2         | <a href="#">113264106</a> | 7.170918189 | 2.842158 | 2.25E-07 | 1.93E-06 |
| SOX17        | <a href="#">113268095</a> | 7.169734879 | 2.84192  | 2.47E-10 | 3.71E-09 |
| EXTL1        | <a href="#">113268473</a> | 7.15619801  | 2.839193 | 2.74E-06 | 1.93E-05 |
| PLAC8L1      | <a href="#">113255346</a> | 7.147298766 | 2.837398 | 1.67E-06 | 1.22E-05 |
| LTBP4        | <a href="#">113243560</a> | 7.143776596 | 2.836687 | 9.1E-08  | 8.47E-07 |
| SMPDL3B      | <a href="#">113268215</a> | 7.104632599 | 2.82876  | 2.9E-06  | 2.04E-05 |
| LOC113241646 | <a href="#">113241646</a> | 7.065759189 | 2.820845 | 1.15E-06 | 8.65E-06 |
| ZBED9        | <a href="#">113248149</a> | 7.059299712 | 2.819525 | 3.06E-07 | 2.56E-06 |
| TMEM178B     | <a href="#">113265194</a> | 7.0542612   | 2.818495 | 4.12E-06 | 2.82E-05 |
| FBN3         | <a href="#">113242673</a> | 7.04808923  | 2.817232 | 4.9E-06  | 3.31E-05 |
| PDP1         | <a href="#">113252931</a> | 7.04434974  | 2.816467 | 5.66E-12 | 1.15E-10 |
| ARMC2        | <a href="#">113264761</a> | 7.043148465 | 2.81622  | 1.17E-07 | 1.06E-06 |
| LOC113266367 | <a href="#">113266367</a> | 7.017695517 | 2.810997 | 1.69E-13 | 4.54E-12 |
| MYH11        | <a href="#">113270760</a> | 7.003232255 | 2.808021 | 5.67E-10 | 7.96E-09 |
| CHCHD3       | <a href="#">113264293</a> | 6.98859925  | 2.805003 | 1.09E-07 | 9.95E-07 |
| LOC113240812 | <a href="#">113240812</a> | 6.982937789 | 2.803834 | 2.79E-10 | 4.17E-09 |
| SYT9         | <a href="#">113245781</a> | 6.953225525 | 2.797682 | 5.26E-06 | 3.53E-05 |
| LRCH2        | <a href="#">113241252</a> | 6.948900609 | 2.796785 | 7.51E-07 | 5.86E-06 |
| RAB3A        | <a href="#">113256710</a> | 6.921868242 | 2.791161 | 1.9E-12  | 4.27E-11 |
| HDHD5        | <a href="#">113258055</a> | 6.918837004 | 2.79053  | 1.97E-08 | 2.05E-07 |
| ETFDH        | <a href="#">113255802</a> | 6.898279169 | 2.786237 | 2.74E-07 | 2.31E-06 |
| ATP1B1       | <a href="#">113262865</a> | 6.881703517 | 2.782766 | 1.12E-10 | 1.79E-09 |

|              |                           |             |          |          |          |
|--------------|---------------------------|-------------|----------|----------|----------|
| ACADVL       | <a href="#">113271108</a> | 6.88066141  | 2.782547 | 1.16E-05 | 7.24E-05 |
| SMYD1        | <a href="#">113242840</a> | 6.880418017 | 2.782496 | 2.53E-13 | 6.61E-12 |
| ADCY9        | <a href="#">113270857</a> | 6.872362413 | 2.780806 | 2.12E-11 | 3.9E-10  |
| FXR1         | <a href="#">113254657</a> | 6.871710133 | 2.780669 | 2.35E-07 | 2.01E-06 |
| EDA2R        | <a href="#">113246887</a> | 6.870028991 | 2.780316 | 2.49E-06 | 1.77E-05 |
| LOC113248397 | <a href="#">113248397</a> | 6.866759396 | 2.779629 | 9.49E-08 | 8.77E-07 |
| POPDC2       | <a href="#">113251933</a> | 6.861604437 | 2.778546 | 2.28E-09 | 2.85E-08 |
| CNTN3        | <a href="#">113257091</a> | 6.85204373  | 2.776534 | 4.31E-06 | 2.95E-05 |
| CDKL2        | <a href="#">113263265</a> | 6.850639221 | 2.776239 | 6.22E-06 | 4.11E-05 |
| RPL10        | <a href="#">113247845</a> | 6.844918988 | 2.775033 | 0.000181 | 0.000857 |
| CAMK2D       | <a href="#">113255589</a> | 6.834240084 | 2.772781 | 4.36E-13 | 1.1E-11  |
| NFIX         | <a href="#">113247201</a> | 6.818836199 | 2.769526 | 2.1E-08  | 2.17E-07 |
| TMEM65       | <a href="#">113252747</a> | 6.805687333 | 2.766741 | 2.29E-12 | 5.06E-11 |
| LOC113252883 | <a href="#">113252883</a> | 6.804959637 | 2.766587 | 2.87E-07 | 2.41E-06 |
| USF3         | <a href="#">113251469</a> | 6.795833824 | 2.764651 | 1.35E-09 | 1.76E-08 |
| LOC113267511 | <a href="#">113267511</a> | 6.790577229 | 2.763534 | 1.53E-06 | 1.12E-05 |
| MAP3K20      | <a href="#">113250769</a> | 6.775245011 | 2.760273 | 3.59E-08 | 3.59E-07 |
| CHRNB1       | <a href="#">113271122</a> | 6.774343198 | 2.760081 | 3.9E-12  | 8.19E-11 |
| AXIN2        | <a href="#">113265246</a> | 6.768891798 | 2.75892  | 1.35E-09 | 1.76E-08 |
| RNF122       | <a href="#">113262147</a> | 6.757554864 | 2.756501 | 2.59E-08 | 2.64E-07 |
| HBEGF        | <a href="#">113261821</a> | 6.745916266 | 2.754014 | 7.12E-11 | 1.18E-09 |
| PRKRA        | <a href="#">113250716</a> | 6.741626358 | 2.753097 | 2.48E-12 | 5.42E-11 |
| LOC113242772 | <a href="#">113242772</a> | 6.741397747 | 2.753048 | 3.22E-11 | 5.67E-10 |
| RAMP1        | <a href="#">113250175</a> | 6.737072848 | 2.752122 | 1.39E-08 | 1.49E-07 |
| DUSP28       | <a href="#">113249733</a> | 6.715583732 | 2.747513 | 9.28E-12 | 1.83E-10 |
| MRPS15       | <a href="#">113268283</a> | 6.700553102 | 2.74428  | 3.2E-08  | 3.22E-07 |
| ANK3         | <a href="#">113259074</a> | 6.69115598  | 2.742255 | 1.41E-09 | 1.83E-08 |
| ESRRA        | <a href="#">113244171</a> | 6.679886455 | 2.739824 | 1.26E-10 | 1.98E-09 |

|              |                           |             |          |          |          |
|--------------|---------------------------|-------------|----------|----------|----------|
| NDUFS8       | <a href="#">113244009</a> | 6.654577016 | 2.734347 | 5.93E-09 | 6.77E-08 |
| PRRG3        | <a href="#">113246828</a> | 6.653092098 | 2.734025 | 7.97E-06 | 5.15E-05 |
| PKNOX2       | <a href="#">113259907</a> | 6.651612991 | 2.733704 | 1.49E-09 | 1.92E-08 |
| LOC113242529 | <a href="#">113242529</a> | 6.642758904 | 2.731783 | 2.44E-11 | 4.4E-10  |
| GOLGA7B      | <a href="#">113251802</a> | 6.640961131 | 2.731392 | 4.94E-07 | 3.98E-06 |
| GRM2         | <a href="#">113256929</a> | 6.637895442 | 2.730726 | 4.24E-06 | 2.9E-05  |
| PI16         | <a href="#">113243871</a> | 6.635627601 | 2.730233 | 2.46E-07 | 2.1E-06  |
| MDH2         | <a href="#">113267810</a> | 6.588914917 | 2.720041 | 1.06E-05 | 6.67E-05 |
| HES1         | <a href="#">113253430</a> | 6.568918095 | 2.715656 | 6.71E-11 | 1.12E-09 |
| PPARGC1B     | <a href="#">113263936</a> | 6.552232491 | 2.711987 | 5.53E-10 | 7.8E-09  |
| SLC27A1      | <a href="#">113256682</a> | 6.524759835 | 2.705925 | 5.7E-09  | 6.53E-08 |
| PPP1R13L     | <a href="#">113243431</a> | 6.518721048 | 2.704589 | 2.12E-09 | 2.66E-08 |
| PDHA1        | <a href="#">113242248</a> | 6.477209626 | 2.695372 | 4.12E-06 | 2.82E-05 |
| LOC113242144 | <a href="#">113242144</a> | 6.474494304 | 2.694768 | 8.91E-07 | 6.86E-06 |
| TPMT         | <a href="#">113264505</a> | 6.464765776 | 2.692598 | 4.62E-11 | 7.87E-10 |
| P2RY1        | <a href="#">113254080</a> | 6.460928721 | 2.691742 | 1.84E-07 | 1.61E-06 |
| LOC113243236 | <a href="#">113243236</a> | 6.454432555 | 2.69029  | 1.26E-11 | 2.42E-10 |
| FYCO1        | <a href="#">113256782</a> | 6.445972713 | 2.688398 | 5E-09    | 5.79E-08 |
| LOC113271320 | <a href="#">113271320</a> | 6.442484377 | 2.687617 | 4.77E-08 | 4.67E-07 |
| NDUFAF6      | <a href="#">113252915</a> | 6.423890089 | 2.683447 | 7.33E-09 | 8.22E-08 |
| NDUFA12      | <a href="#">113256147</a> | 6.421132556 | 2.682828 | 3.93E-09 | 4.64E-08 |
| ETFRF1       | <a href="#">113257793</a> | 6.409534792 | 2.68022  | 2.18E-07 | 1.87E-06 |
| SHISA2       | <a href="#">113251193</a> | 6.401701373 | 2.678455 | 7.36E-10 | 1.01E-08 |
| SUCLA2       | <a href="#">113251333</a> | 6.381590783 | 2.673916 | 4.66E-07 | 3.77E-06 |
| RILPL1       | <a href="#">113266895</a> | 6.364944067 | 2.670148 | 8.13E-11 | 1.33E-09 |
| LOC113248617 | <a href="#">113248617</a> | 6.354983589 | 2.667888 | 9.13E-06 | 5.82E-05 |
| PPTC7        | <a href="#">113266959</a> | 6.351822306 | 2.667171 | 8.43E-10 | 1.15E-08 |
| MYH14        | <a href="#">113247345</a> | 6.347551514 | 2.6662   | 5.19E-09 | 5.99E-08 |

|              |                           |             |          |          |          |
|--------------|---------------------------|-------------|----------|----------|----------|
| SETD9        | <a href="#">113255320</a> | 6.335526336 | 2.663464 | 2.1E-07  | 1.81E-06 |
| TLR9         | <a href="#">113256623</a> | 6.321367372 | 2.660237 | 4.07E-10 | 5.9E-09  |
| ATP5MG       | <a href="#">113260000</a> | 6.316439889 | 2.659112 | 2.65E-06 | 1.87E-05 |
| ADAMTS20     | <a href="#">113257720</a> | 6.311410602 | 2.657962 | 7.52E-06 | 4.89E-05 |
| LGI2         | <a href="#">113266752</a> | 6.309054272 | 2.657424 | 1.17E-05 | 7.28E-05 |
| LOC113245770 | <a href="#">113245770</a> | 6.30589226  | 2.656701 | 1.52E-05 | 9.16E-05 |
| WISP3        | <a href="#">113264685</a> | 6.298303873 | 2.654963 | 9.25E-07 | 7.1E-06  |
| SERINC4      | <a href="#">113241957</a> | 6.291165533 | 2.653327 | 2.39E-07 | 2.04E-06 |
| SCX          | <a href="#">113247694</a> | 6.290541149 | 2.653184 | 4.95E-05 | 0.000266 |
| NDUFA4       | <a href="#">113260639</a> | 6.283870149 | 2.651653 | 5.62E-06 | 3.75E-05 |
| SLC35F2      | <a href="#">113260101</a> | 6.282765938 | 2.6514   | 2.61E-09 | 3.2E-08  |
| PPARA        | <a href="#">113241644</a> | 6.273731879 | 2.649324 | 3.64E-11 | 6.34E-10 |
| CAPN3        | <a href="#">113241990</a> | 6.261786154 | 2.646574 | 0.00107  | 0.004083 |
| CENPV        | <a href="#">113271255</a> | 6.244828243 | 2.642662 | 1.73E-08 | 1.82E-07 |
| NIPSNAP2     | <a href="#">113267734</a> | 6.226946484 | 2.638525 | 6.12E-07 | 4.86E-06 |
| TRH          | <a href="#">113257205</a> | 6.205034911 | 2.633439 | 9.08E-07 | 6.98E-06 |
| NDUFB9       | <a href="#">113252742</a> | 6.178713451 | 2.627306 | 7.51E-07 | 5.86E-06 |
| GPRC5C       | <a href="#">113265205</a> | 6.171373065 | 2.625592 | 1.16E-07 | 1.05E-06 |
| ZBTB18       | <a href="#">113262963</a> | 6.13977987  | 2.618187 | 2.58E-11 | 4.64E-10 |
| STBD1        | <a href="#">113263249</a> | 6.119940837 | 2.613518 | 1.09E-06 | 8.25E-06 |
| PHTF2        | <a href="#">113259141</a> | 6.109753095 | 2.611114 | 2.13E-10 | 3.24E-09 |
| DVL1         | <a href="#">113270636</a> | 6.083712593 | 2.604952 | 3.15E-09 | 3.81E-08 |
| KIAA1671     | <a href="#">113244966</a> | 6.083302833 | 2.604855 | 4.95E-11 | 8.41E-10 |
| LOC113248438 | <a href="#">113248438</a> | 6.056798411 | 2.598555 | 1.54E-08 | 1.64E-07 |
| NDUFB10      | <a href="#">113245135</a> | 6.055005743 | 2.598128 | 1.87E-07 | 1.63E-06 |
| BAG2         | <a href="#">113261157</a> | 6.05338804  | 2.597743 | 3.42E-11 | 5.98E-10 |
| MFAP4        | <a href="#">113271275</a> | 6.048171175 | 2.596499 | 3.39E-05 | 0.000188 |
| VDAC2        | <a href="#">113259206</a> | 6.039324003 | 2.594387 | 0.000113 | 0.000562 |

|              |                           |             |          |          |          |
|--------------|---------------------------|-------------|----------|----------|----------|
| ECI1         | <a href="#">113245118</a> | 6.012121235 | 2.587874 | 7.46E-07 | 5.83E-06 |
| HLF          | <a href="#">113265652</a> | 6.003264619 | 2.585747 | 1.6E-09  | 2.06E-08 |
| IDH2         | <a href="#">113263704</a> | 5.99452789  | 2.583646 | 2.34E-05 | 0.000135 |
| CLIP4        | <a href="#">113240806</a> | 5.980095059 | 2.580168 | 1.82E-07 | 1.6E-06  |
| CASQ2        | <a href="#">113244385</a> | 5.97542833  | 2.579042 | 8.05E-07 | 6.25E-06 |
| ZFP3         | <a href="#">113271064</a> | 5.97326311  | 2.578519 | 1.63E-11 | 3.07E-10 |
| SLC2A4       | <a href="#">113271115</a> | 5.962536525 | 2.575926 | 1.09E-06 | 8.24E-06 |
| ZNF784       | <a href="#">113247372</a> | 5.955427153 | 2.574205 | 3.97E-11 | 6.86E-10 |
| FAHD1        | <a href="#">113245129</a> | 5.954289406 | 2.573929 | 3.88E-11 | 6.72E-10 |
| PK4          | <a href="#">113260367</a> | 5.952428137 | 2.573478 | 0.000245 | 0.001117 |
| LOC113255131 | <a href="#">113255131</a> | 5.95038319  | 2.572983 | 6.54E-06 | 4.31E-05 |
| TMC7         | <a href="#">113270737</a> | 5.949157893 | 2.572685 | 2.27E-05 | 0.000131 |
| KIZ          | <a href="#">113246779</a> | 5.944854062 | 2.571641 | 2.34E-09 | 2.92E-08 |
| TPH2         | <a href="#">113256261</a> | 5.935556209 | 2.569383 | 1.1E-05  | 6.91E-05 |
| MYRIP        | <a href="#">113253804</a> | 5.932124679 | 2.568549 | 2.73E-06 | 1.92E-05 |
| ANAPC13      | <a href="#">113253961</a> | 5.928021719 | 2.567551 | 9.18E-08 | 8.51E-07 |
| PTGES2       | <a href="#">113266452</a> | 5.923355394 | 2.566415 | 7.32E-09 | 8.22E-08 |
| SEL1L3       | <a href="#">113266760</a> | 5.923243274 | 2.566387 | 2.24E-11 | 4.09E-10 |
| KIF1B        | <a href="#">113270521</a> | 5.904179759 | 2.561737 | 1.42E-07 | 1.27E-06 |
| LOC113243583 | <a href="#">113243583</a> | 5.897930184 | 2.560209 | 1.01E-06 | 7.68E-06 |
| WNT11        | <a href="#">113269338</a> | 5.886753609 | 2.557472 | 1.07E-05 | 6.7E-05  |
| FAM210A      | <a href="#">113245962</a> | 5.882731563 | 2.556486 | 5.1E-11  | 8.63E-10 |
| MORN4        | <a href="#">113251794</a> | 5.881932828 | 2.55629  | 1.49E-06 | 1.1E-05  |
| PYGO1        | <a href="#">113269652</a> | 5.876674515 | 2.555    | 3.73E-10 | 5.45E-09 |
| CRISPLD1     | <a href="#">113253036</a> | 5.874948368 | 2.554576 | 0.000327 | 0.001445 |
| KLF11        | <a href="#">113269781</a> | 5.87326924  | 2.554164 | 1.68E-08 | 1.78E-07 |
| LOC113267549 | <a href="#">113267549</a> | 5.85842565  | 2.550513 | 8.48E-06 | 5.45E-05 |
| LOC113245579 | <a href="#">113245579</a> | 5.851463409 | 2.548797 | 0.000598 | 0.002459 |

|              |                           |             |          |          |          |
|--------------|---------------------------|-------------|----------|----------|----------|
| LOC113245723 | <a href="#">113245723</a> | 5.84792332  | 2.547924 | 3.22E-05 | 0.00018  |
| FREM2        | <a href="#">113251271</a> | 5.842298963 | 2.546536 | 0.000314 | 0.00139  |
| KCNA5        | <a href="#">113257992</a> | 5.839539131 | 2.545855 | 0.000124 | 0.000604 |
| PLPPR1       | <a href="#">113260387</a> | 5.836672364 | 2.545146 | 0.000237 | 0.001083 |
| NDUFA11      | <a href="#">113242864</a> | 5.834026137 | 2.544492 | 5.9E-10  | 8.26E-09 |
| NQO1         | <a href="#">113252434</a> | 5.830650385 | 2.543657 | 5.19E-11 | 8.77E-10 |
| TEAD3        | <a href="#">113243691</a> | 5.82895446  | 2.543237 | 2.5E-07  | 2.13E-06 |
| LOC113253727 | <a href="#">113253727</a> | 5.825279948 | 2.542327 | 3.94E-05 | 0.000216 |
| LOC113257480 | <a href="#">113257480</a> | 5.820090642 | 2.541042 | 3.73E-06 | 2.57E-05 |
| LOC113252181 | <a href="#">113252181</a> | 5.797127588 | 2.535338 | 0.000166 | 0.000791 |
| ZNF462       | <a href="#">113260346</a> | 5.790765083 | 2.533754 | 2.38E-11 | 4.31E-10 |
| CEACAM20     | <a href="#">113243463</a> | 5.790555399 | 2.533702 | 3.83E-05 | 0.00021  |
| LOC113254331 | <a href="#">113254331</a> | 5.785271272 | 2.532385 | 9.79E-10 | 1.31E-08 |
| TEX9         | <a href="#">113269661</a> | 5.778979541 | 2.530815 | 2E-07    | 1.74E-06 |
| ATP5MD       | <a href="#">113251890</a> | 5.773479692 | 2.529441 | 3.46E-09 | 4.14E-08 |
| LOC113257418 | <a href="#">113257418</a> | 5.767537519 | 2.527955 | 3.52E-08 | 3.52E-07 |
| DENND2D      | <a href="#">113244894</a> | 5.767147856 | 2.527858 | 3.08E-09 | 3.73E-08 |
| MRPL51       | <a href="#">113257979</a> | 5.759873345 | 2.526037 | 1.43E-09 | 1.85E-08 |
| UCKL1        | <a href="#">113258827</a> | 5.757244893 | 2.525379 | 3.02E-11 | 5.35E-10 |
| PHKA1        | <a href="#">113245604</a> | 5.748705442 | 2.523237 | 4.42E-07 | 3.6E-06  |
| LOC113271230 | <a href="#">113271230</a> | 5.745748124 | 2.522495 | 1.39E-09 | 1.81E-08 |
| BCL6B        | <a href="#">113271094</a> | 5.743637129 | 2.521965 | 6.58E-09 | 7.44E-08 |
| PRKN         | <a href="#">113259330</a> | 5.734965474 | 2.519785 | 2.43E-06 | 1.73E-05 |
| MLPH         | <a href="#">113250295</a> | 5.680377425 | 2.505987 | 3.49E-05 | 0.000194 |
| RNF150       | <a href="#">113255701</a> | 5.661863557 | 2.501277 | 1.22E-08 | 1.32E-07 |
| MLF1         | <a href="#">113254118</a> | 5.659582318 | 2.500696 | 7.81E-08 | 7.38E-07 |
| NDUFA3       | <a href="#">113247437</a> | 5.644510808 | 2.496849 | 2.94E-09 | 3.58E-08 |
| HMCN2        | <a href="#">113266283</a> | 5.643602501 | 2.496616 | 3.77E-05 | 0.000207 |

|              |                           |             |          |          |          |
|--------------|---------------------------|-------------|----------|----------|----------|
| SBK1         | <a href="#">113267619</a> | 5.62824898  | 2.492686 | 6.77E-10 | 9.36E-09 |
| FDFT1        | <a href="#">113269919</a> | 5.616824613 | 2.489755 | 4.28E-08 | 4.23E-07 |
| ERBB2        | <a href="#">113265512</a> | 5.611378758 | 2.488355 | 1.84E-07 | 1.62E-06 |
| LGALS1       | <a href="#">113244940</a> | 5.608598646 | 2.48764  | 5.8E-08  | 5.59E-07 |
| CUNH12orf73  | <a href="#">113256066</a> | 5.593705378 | 2.483804 | 7.93E-10 | 1.08E-08 |
| WDR17        | <a href="#">113262226</a> | 5.591119622 | 2.483137 | 3.33E-05 | 0.000185 |
| COPS9        | <a href="#">113249750</a> | 5.589966007 | 2.48284  | 7.24E-09 | 8.14E-08 |
| LIX1         | <a href="#">113255058</a> | 5.585838905 | 2.481774 | 4.9E-07  | 3.95E-06 |
| ANOS1        | <a href="#">113240755</a> | 5.580970583 | 2.480516 | 1.81E-05 | 0.000107 |
| YJEFN3       | <a href="#">113256756</a> | 5.580872996 | 2.480491 | 3.31E-05 | 0.000184 |
| FLT1         | <a href="#">113251212</a> | 5.575517146 | 2.479106 | 4.86E-10 | 6.93E-09 |
| NDUFA5       | <a href="#">113263568</a> | 5.574741212 | 2.478905 | 3.45E-09 | 4.14E-08 |
| UBE2B        | <a href="#">113261739</a> | 5.566987162 | 2.476897 | 2.3E-07  | 1.97E-06 |
| LOC113260502 | <a href="#">113260502</a> | 5.564629564 | 2.476286 | 5.42E-06 | 3.62E-05 |
| AHDC1        | <a href="#">113268435</a> | 5.558151421 | 2.474605 | 1.94E-11 | 3.6E-10  |
| CA11         | <a href="#">113243341</a> | 5.548128136 | 2.472001 | 0.000118 | 0.00058  |
| PPP1R1A      | <a href="#">113257512</a> | 5.547066035 | 2.471725 | 0.000894 | 0.003492 |
| PANK1        | <a href="#">113243152</a> | 5.536769316 | 2.469044 | 2.44E-09 | 3.03E-08 |
| BOLA3        | <a href="#">113243813</a> | 5.5364189   | 2.468953 | 1.93E-08 | 2.02E-07 |
| LRRC47       | <a href="#">113270589</a> | 5.527979114 | 2.466752 | 1.88E-09 | 2.38E-08 |
| NDUFS7       | <a href="#">113242730</a> | 5.520934937 | 2.464913 | 4.39E-07 | 3.57E-06 |
| KPNA3        | <a href="#">113251312</a> | 5.517957346 | 2.464134 | 1.29E-06 | 9.62E-06 |
| OTUD1        | <a href="#">113241334</a> | 5.515815148 | 2.463574 | 2.08E-07 | 1.8E-06  |
| CUNH6orf136  | <a href="#">113264361</a> | 5.51266198  | 2.462749 | 1.7E-08  | 1.8E-07  |
| OAZ2         | <a href="#">113240855</a> | 5.510504    | 2.462184 | 1.54E-08 | 1.64E-07 |
| MTTP         | <a href="#">113263115</a> | 5.504583834 | 2.460633 | 1.32E-05 | 8.09E-05 |
| SPAG7        | <a href="#">113271070</a> | 5.499083617 | 2.459191 | 7.93E-10 | 1.08E-08 |
| GRAMD2B      | <a href="#">113261664</a> | 5.490260316 | 2.456875 | 6.83E-09 | 7.69E-08 |

|              |                           |             |          |          |          |
|--------------|---------------------------|-------------|----------|----------|----------|
| LOC113248560 | <a href="#">113248560</a> | 5.486721685 | 2.455944 | 5.1E-05  | 0.000273 |
| FGF13        | <a href="#">113241875</a> | 5.476154067 | 2.453163 | 1.48E-05 | 8.94E-05 |
| SCN8A        | <a href="#">113257599</a> | 5.475237559 | 2.452922 | 1.2E-09  | 1.57E-08 |
| GPD1L        | <a href="#">113253839</a> | 5.471042174 | 2.451816 | 7.46E-10 | 1.03E-08 |
| CCDC155      | <a href="#">113243304</a> | 5.455632571 | 2.447746 | 5.79E-05 | 0.000306 |
| DYRK2        | <a href="#">113256306</a> | 5.455516169 | 2.447716 | 4.96E-10 | 7.06E-09 |
| MEF2C        | <a href="#">113255121</a> | 5.444189822 | 2.444717 | 1.42E-06 | 1.05E-05 |
| DOC2B        | <a href="#">113268834</a> | 5.444159978 | 2.444709 | 1.57E-05 | 9.42E-05 |
| LOC113247645 | <a href="#">113247645</a> | 5.436475106 | 2.442672 | 0.000331 | 0.001456 |
| ZNRF1        | <a href="#">113252493</a> | 5.418873766 | 2.437993 | 2.96E-09 | 3.6E-08  |
| TMEM38B      | <a href="#">113260348</a> | 5.409990057 | 2.435626 | 4.27E-09 | 5E-08    |
| HOXA10       | <a href="#">113262042</a> | 5.397442729 | 2.432276 | 2.27E-09 | 2.83E-08 |
| TMEM246      | <a href="#">113260380</a> | 5.392308903 | 2.430903 | 7.85E-06 | 5.09E-05 |
| ACADM        | <a href="#">113254520</a> | 5.388383606 | 2.429853 | 1.45E-05 | 8.81E-05 |
| ACOX3        | <a href="#">113245696</a> | 5.386825448 | 2.429435 | 1.15E-08 | 1.26E-07 |
| AAMDC        | <a href="#">113269361</a> | 5.383916659 | 2.428656 | 3.98E-09 | 4.69E-08 |
| NNT          | <a href="#">113260959</a> | 5.371203587 | 2.425245 | 1.75E-06 | 1.28E-05 |
| CUNH10orf62  | <a href="#">113251793</a> | 5.354518136 | 2.420757 | 2.78E-05 | 0.000158 |
| STOX2        | <a href="#">113262252</a> | 5.344561294 | 2.418072 | 1.74E-07 | 1.53E-06 |
| MRPS36       | <a href="#">113255258</a> | 5.33261457  | 2.414843 | 1.08E-08 | 1.18E-07 |
| LOC113250450 | <a href="#">113250450</a> | 5.31103322  | 2.408993 | 2.98E-09 | 3.63E-08 |
| NDUFA1       | <a href="#">113241285</a> | 5.303990583 | 2.407078 | 1.5E-08  | 1.6E-07  |
| SLITRK2      | <a href="#">113241887</a> | 5.298592164 | 2.405609 | 0.000401 | 0.001727 |
| PGAP3        | <a href="#">113265515</a> | 5.294264167 | 2.40443  | 1.17E-11 | 2.28E-10 |
| LOC113250233 | <a href="#">113250233</a> | 5.285752321 | 2.402109 | 1.62E-10 | 2.5E-09  |
| CTNNAL1      | <a href="#">113260338</a> | 5.283956001 | 2.401618 | 1.88E-08 | 1.96E-07 |
| PHF24        | <a href="#">113260496</a> | 5.281801576 | 2.40103  | 1.34E-05 | 8.17E-05 |
| CACNA1H      | <a href="#">113245079</a> | 5.27816491  | 2.400036 | 1.2E-05  | 7.43E-05 |

|              |                           |             |          |          |          |
|--------------|---------------------------|-------------|----------|----------|----------|
| NXN          | <a href="#">113269097</a> | 5.276538079 | 2.399592 | 8.67E-09 | 9.65E-08 |
| ZFAND5       | <a href="#">113270228</a> | 5.276342198 | 2.399538 | 1.33E-06 | 9.89E-06 |
| LOC113248562 | <a href="#">113248562</a> | 5.270195848 | 2.397857 | 1.02E-08 | 1.12E-07 |
| ITIH4        | <a href="#">113256969</a> | 5.269590197 | 2.397691 | 0.000194 | 0.000906 |
| CAGE1        | <a href="#">113264234</a> | 5.257284543 | 2.394318 | 8.18E-05 | 0.000419 |
| SPHKAP       | <a href="#">113250375</a> | 5.254945421 | 2.393676 | 0.001112 | 0.004223 |
| TCIM         | <a href="#">113245539</a> | 5.254461323 | 2.393543 | 5.56E-08 | 5.38E-07 |
| METTL2       | <a href="#">113270820</a> | 5.251648646 | 2.39277  | 3.38E-09 | 4.05E-08 |
| LOC113247989 | <a href="#">113247989</a> | 5.245952889 | 2.391205 | 3.53E-06 | 2.44E-05 |
| IDH3G        | <a href="#">113247853</a> | 5.245782147 | 2.391158 | 6.66E-06 | 4.37E-05 |
| TPI1         | <a href="#">113257956</a> | 5.240625064 | 2.389739 | 0.000879 | 0.003438 |
| WDR88        | <a href="#">113244752</a> | 5.229630098 | 2.386709 | 2.98E-05 | 0.000168 |
| NDUFAB1      | <a href="#">113267578</a> | 5.215475644 | 2.382799 | 8.43E-08 | 7.89E-07 |
| SIRT5        | <a href="#">113264471</a> | 5.210388645 | 2.381391 | 1.21E-07 | 1.09E-06 |
| CHRNE        | <a href="#">113271084</a> | 5.204140984 | 2.37966  | 6.24E-05 | 0.000328 |
| LOC113250232 | <a href="#">113250232</a> | 5.191194441 | 2.376067 | 5.58E-10 | 7.87E-09 |
| LOC113249271 | <a href="#">113249271</a> | 5.188905333 | 2.37543  | 2.11E-09 | 2.65E-08 |
| P2RX5        | <a href="#">113269156</a> | 5.18605883  | 2.374639 | 2.21E-09 | 2.77E-08 |
| SNURF        | <a href="#">113263596</a> | 5.184131161 | 2.374102 | 6.04E-09 | 6.88E-08 |
| PELI3        | <a href="#">113244063</a> | 5.182695035 | 2.373703 | 5.64E-06 | 3.75E-05 |
| NDUFB5       | <a href="#">113254753</a> | 5.182254423 | 2.37358  | 6.48E-09 | 7.35E-08 |
| NDUFS4       | <a href="#">113263912</a> | 5.180952033 | 2.373217 | 6.79E-08 | 6.49E-07 |
| PDE4B        | <a href="#">113254561</a> | 5.176978039 | 2.37211  | 3.17E-07 | 2.64E-06 |
| ACYP2        | <a href="#">113245706</a> | 5.16460707  | 2.368659 | 1.02E-05 | 6.45E-05 |
| TAGLN        | <a href="#">113260017</a> | 5.162970495 | 2.368201 | 1.82E-07 | 1.6E-06  |
| JAG2         | <a href="#">113267148</a> | 5.154148089 | 2.365734 | 4.1E-09  | 4.82E-08 |
| MRPL33       | <a href="#">113240736</a> | 5.14920264  | 2.364349 | 5.08E-08 | 4.95E-07 |
| KIAA1217     | <a href="#">113241331</a> | 5.142682744 | 2.362521 | 9.76E-10 | 1.31E-08 |

|              |                           |             |          |          |          |
|--------------|---------------------------|-------------|----------|----------|----------|
| BZW2         | <a href="#">113261015</a> | 5.142298357 | 2.362413 | 2.76E-07 | 2.33E-06 |
| MAP3K7CL     | <a href="#">113267437</a> | 5.125506677 | 2.357695 | 2.11E-06 | 1.52E-05 |
| FAM83C       | <a href="#">113258536</a> | 5.124313321 | 2.357359 | 1.91E-05 | 0.000112 |
| ACTA2        | <a href="#">113258969</a> | 5.116930042 | 2.355279 | 1.19E-09 | 1.57E-08 |
| RNF225       | <a href="#">113248032</a> | 5.116265534 | 2.355091 | 7.65E-05 | 0.000394 |
| LOC113244568 | <a href="#">113244568</a> | 5.109196029 | 2.353096 | 8.37E-05 | 0.000427 |
| LOC113266806 | <a href="#">113266806</a> | 5.09912202  | 2.350249 | 0.002569 | 0.008747 |
| VDAC3        | <a href="#">113245581</a> | 5.097905706 | 2.349905 | 4.07E-05 | 0.000221 |
| SULF2        | <a href="#">113258690</a> | 5.091898189 | 2.348204 | 1.15E-06 | 8.66E-06 |
| LOC113254515 | <a href="#">113254515</a> | 5.08986265  | 2.347627 | 0.000189 | 0.000887 |
| MAFF         | <a href="#">113241783</a> | 5.088669802 | 2.347289 | 3.79E-08 | 3.77E-07 |
| NDUFA8       | <a href="#">113266369</a> | 5.088070083 | 2.347119 | 1.56E-06 | 1.15E-05 |
| DNASE1L1     | <a href="#">113247843</a> | 5.041284203 | 2.333791 | 7.82E-07 | 6.08E-06 |
| NHLRC1       | <a href="#">113264504</a> | 5.032565712 | 2.331294 | 1.38E-05 | 8.46E-05 |
| DKK3         | <a href="#">113246270</a> | 5.001037803 | 2.322228 | 0.00013  | 0.000631 |
| IRAK1BP1     | <a href="#">113261094</a> | 4.993969694 | 2.320187 | 2.14E-06 | 1.54E-05 |
| HOXA7        | <a href="#">113262001</a> | 4.990864408 | 2.31929  | 5.66E-07 | 4.51E-06 |
| ARPP19       | <a href="#">113269638</a> | 4.98805239  | 2.318477 | 2.94E-06 | 2.06E-05 |
| LOC113248616 | <a href="#">113248616</a> | 4.982546716 | 2.316883 | 2.11E-08 | 2.18E-07 |
| LOC113252908 | <a href="#">113252908</a> | 4.973140037 | 2.314157 | 1.29E-05 | 7.93E-05 |
| IMMP2L       | <a href="#">113262909</a> | 4.971730147 | 2.313748 | 3.44E-07 | 2.85E-06 |
| SUSD4        | <a href="#">113262898</a> | 4.968029602 | 2.312674 | 0.000622 | 0.002543 |
| PDK2         | <a href="#">113265612</a> | 4.967713081 | 2.312582 | 3.65E-06 | 2.52E-05 |
| ATP5MPL      | <a href="#">113267204</a> | 4.958596821 | 2.309932 | 2.1E-06  | 1.51E-05 |
| ACADS        | <a href="#">113267053</a> | 4.957977519 | 2.309752 | 2.71E-06 | 1.91E-05 |
| LYSMD1       | <a href="#">113246163</a> | 4.952779437 | 2.308238 | 6.55E-08 | 6.27E-07 |
| SDHB         | <a href="#">113270447</a> | 4.950619086 | 2.307609 | 1.91E-06 | 1.38E-05 |
| HIF3A        | <a href="#">113243399</a> | 4.946625659 | 2.306445 | 0.00019  | 0.000888 |

|              |                           |             |          |          |          |
|--------------|---------------------------|-------------|----------|----------|----------|
| VDAC1        | <a href="#">113261734</a> | 4.94236777  | 2.305202 | 0.000139 | 0.000671 |
| HOMER3       | <a href="#">113256738</a> | 4.941869015 | 2.305057 | 3.26E-09 | 3.93E-08 |
| IGSF23       | <a href="#">113243462</a> | 4.918616999 | 2.298253 | 4.02E-05 | 0.000219 |
| MFN2         | <a href="#">113270495</a> | 4.918232638 | 2.29814  | 6.26E-06 | 4.14E-05 |
| CUEDC1       | <a href="#">113268859</a> | 4.908684331 | 2.295336 | 7.67E-08 | 7.26E-07 |
| CYR61        | <a href="#">113254464</a> | 4.908344555 | 2.295237 | 1.77E-08 | 1.86E-07 |
| TEX29        | <a href="#">113248531</a> | 4.904636985 | 2.294146 | 8.51E-06 | 5.46E-05 |
| LOC113257882 | <a href="#">113257882</a> | 4.90434679  | 2.294061 | 0.000108 | 0.000539 |
| NDUFA9       | <a href="#">113257995</a> | 4.898221765 | 2.292258 | 1.11E-06 | 8.39E-06 |
| ATP5MC2      | <a href="#">113257544</a> | 4.896569563 | 2.291771 | 2.28E-05 | 0.000132 |
| SLC25A11     | <a href="#">113271067</a> | 4.883670965 | 2.287966 | 1.78E-06 | 1.3E-05  |
| PPP1R3F      | <a href="#">113265953</a> | 4.880940524 | 2.287159 | 1.24E-06 | 9.29E-06 |
| MAGIX        | <a href="#">113265825</a> | 4.876353542 | 2.285803 | 2.25E-07 | 1.93E-06 |
| KHDRBS3      | <a href="#">113252694</a> | 4.873685864 | 2.285013 | 0.000129 | 0.000629 |
| SYT7         | <a href="#">113246992</a> | 4.870581233 | 2.284094 | 8.28E-07 | 6.41E-06 |
| SLC25A30     | <a href="#">113251350</a> | 4.87050487  | 2.284071 | 1.72E-08 | 1.81E-07 |
| SUCLG1       | <a href="#">113243306</a> | 4.869676356 | 2.283826 | 8.45E-05 | 0.000431 |
| NEU3         | <a href="#">113269322</a> | 4.864477853 | 2.282285 | 8.99E-09 | 9.98E-08 |
| LOC113261568 | <a href="#">113261568</a> | 4.863444805 | 2.281979 | 1.16E-08 | 1.26E-07 |
| TOB1         | <a href="#">113265636</a> | 4.861364096 | 2.281361 | 6.93E-08 | 6.61E-07 |
| SVIL         | <a href="#">113244243</a> | 4.860904544 | 2.281225 | 3.36E-05 | 0.000187 |
| CIPC         | <a href="#">113270299</a> | 4.860780052 | 2.281188 | 3.53E-09 | 4.21E-08 |
| CFAP54       | <a href="#">113256123</a> | 4.850251988 | 2.27806  | 0.000331 | 0.001457 |
| TNFRSF12A    | <a href="#">113245425</a> | 4.846130893 | 2.276833 | 0.000362 | 0.001577 |
| KIAA1755     | <a href="#">113258589</a> | 4.842617008 | 2.275787 | 8.77E-05 | 0.000446 |
| ATP5F1A      | <a href="#">113253374</a> | 4.840685563 | 2.275211 | 0.001838 | 0.006532 |
| TRIM45       | <a href="#">113244373</a> | 4.840650775 | 2.275201 | 2.45E-08 | 2.5E-07  |
| LOC113257633 | <a href="#">113257633</a> | 4.83940976  | 2.274831 | 3.44E-09 | 4.12E-08 |

|              |                           |             |          |          |          |
|--------------|---------------------------|-------------|----------|----------|----------|
| TENM1        | <a href="#">113270934</a> | 4.835496757 | 2.273664 | 0.000142 | 0.000685 |
| ZSCAN12      | <a href="#">113248152</a> | 4.815036701 | 2.267547 | 1.75E-07 | 1.54E-06 |
| LOC113244843 | <a href="#">113244843</a> | 4.813134009 | 2.266977 | 6.72E-06 | 4.41E-05 |
| LOC113258460 | <a href="#">113258460</a> | 4.808523112 | 2.265594 | 9.73E-05 | 0.000489 |
| HOXD9        | <a href="#">113250743</a> | 4.807298689 | 2.265226 | 0.0002   | 0.000929 |
| NDUFB11      | <a href="#">113265993</a> | 4.801283092 | 2.26342  | 8.75E-07 | 6.74E-06 |
| LOC113249623 | <a href="#">113249623</a> | 4.791451023 | 2.260463 | 0.012365 | 0.03346  |
| ITIH3        | <a href="#">113256968</a> | 4.786123389 | 2.258858 | 0.000112 | 0.000555 |
| PPP3CB       | <a href="#">113259177</a> | 4.78374038  | 2.258139 | 4.94E-07 | 3.98E-06 |
| INHBB        | <a href="#">113263463</a> | 4.775124396 | 2.255538 | 6.33E-05 | 0.000332 |
| LOC113251521 | <a href="#">113251521</a> | 4.766539513 | 2.252942 | 0.002711 | 0.009173 |
| FMC1         | <a href="#">113264958</a> | 4.754493474 | 2.249292 | 2.01E-09 | 2.54E-08 |
| CISD1        | <a href="#">113259063</a> | 4.752934296 | 2.248818 | 1.33E-06 | 9.91E-06 |
| COMP         | <a href="#">113256730</a> | 4.744476845 | 2.246249 | 0.009866 | 0.027616 |
| CLCN4        | <a href="#">113240744</a> | 4.73774328  | 2.2442   | 3E-07    | 2.51E-06 |
| CHST10       | <a href="#">113247050</a> | 4.734594766 | 2.243241 | 5.93E-09 | 6.77E-08 |
| CCDC28B      | <a href="#">113268366</a> | 4.726893461 | 2.240892 | 7.64E-06 | 4.96E-05 |
| EFCC1        | <a href="#">113257241</a> | 4.726197745 | 2.24068  | 3.25E-05 | 0.000181 |
| TGFB2        | <a href="#">113268733</a> | 4.711644914 | 2.236231 | 1.79E-08 | 1.88E-07 |
| LOC113246281 | <a href="#">113246281</a> | 4.706216007 | 2.234568 | 0.000409 | 0.001754 |
| SLC14A2      | <a href="#">113253366</a> | 4.698756455 | 2.232279 | 0.000488 | 0.002054 |
| ABLIM1       | <a href="#">113251961</a> | 4.697014479 | 2.231744 | 2.1E-05  | 0.000122 |
| NFIC         | <a href="#">113242797</a> | 4.687890322 | 2.228939 | 9.2E-07  | 7.06E-06 |
| LOC113247619 | <a href="#">113247619</a> | 4.685299412 | 2.228141 | 2.21E-05 | 0.000128 |
| ADSL         | <a href="#">113241749</a> | 4.682097268 | 2.227155 | 8.61E-08 | 8.04E-07 |
| KCNJ12       | <a href="#">113271319</a> | 4.675115531 | 2.225002 | 1.92E-05 | 0.000113 |
| CUTC         | <a href="#">113251818</a> | 4.665234126 | 2.221949 | 9.21E-09 | 1.02E-07 |
| COL11A2      | <a href="#">113243790</a> | 4.660151595 | 2.220377 | 3.6E-05  | 0.000199 |

|              |                           |             |          |          |          |
|--------------|---------------------------|-------------|----------|----------|----------|
| FAM124B      | <a href="#">113250394</a> | 4.659211798 | 2.220086 | 0.000186 | 0.000874 |
| SGIP1        | <a href="#">113254558</a> | 4.646785809 | 2.216233 | 0.000167 | 0.000793 |
| CES1         | <a href="#">113252254</a> | 4.64672847  | 2.216215 | 4.11E-06 | 2.82E-05 |
| LOC113256842 | <a href="#">113256842</a> | 4.63743519  | 2.213327 | 6.71E-05 | 0.00035  |
| LOC113248649 | <a href="#">113248649</a> | 4.631006825 | 2.211326 | 7.68E-09 | 8.58E-08 |
| ZNF358       | <a href="#">113242937</a> | 4.63042649  | 2.211145 | 5.52E-06 | 3.69E-05 |
| LOC113242741 | <a href="#">113242741</a> | 4.627428619 | 2.210211 | 1.55E-06 | 1.14E-05 |
| MPI          | <a href="#">113240979</a> | 4.622105896 | 2.20855  | 3.32E-09 | 3.99E-08 |
| PLEKHB1      | <a href="#">113269294</a> | 4.617135661 | 2.206998 | 2.75E-05 | 0.000156 |
| TRIP10       | <a href="#">113242888</a> | 4.611715448 | 2.205303 | 4.22E-05 | 0.000229 |
| NDUFV2       | <a href="#">113253220</a> | 4.610394365 | 2.20489  | 1.13E-06 | 8.51E-06 |
| MRPS5        | <a href="#">113242194</a> | 4.607810707 | 2.204081 | 2.51E-07 | 2.13E-06 |
| ATP5F1C      | <a href="#">113241155</a> | 4.606158927 | 2.203564 | 0.000134 | 0.000653 |
| CNGB1        | <a href="#">113252297</a> | 4.605728598 | 2.203429 | 0.000224 | 0.00103  |
| KLHL21       | <a href="#">113270566</a> | 4.601924045 | 2.202237 | 2.21E-08 | 2.28E-07 |
| CASKIN1      | <a href="#">113245186</a> | 4.59980393  | 2.201572 | 4.62E-05 | 0.000249 |
| DDAH1        | <a href="#">113254466</a> | 4.593277413 | 2.199524 | 3.94E-06 | 2.71E-05 |
| CCDC141      | <a href="#">113250711</a> | 4.581733451 | 2.195894 | 1.16E-05 | 7.21E-05 |
| CUNH11orf71  | <a href="#">113260034</a> | 4.578405716 | 2.194845 | 0.000129 | 0.000628 |
| MAP7D1       | <a href="#">113268291</a> | 4.570537539 | 2.192364 | 8.82E-06 | 5.64E-05 |
| PANK4        | <a href="#">113270600</a> | 4.566698907 | 2.191152 | 5.44E-09 | 6.25E-08 |
| NR1D2        | <a href="#">113253869</a> | 4.562547466 | 2.18984  | 2.05E-05 | 0.00012  |
| RHOBTB1      | <a href="#">113259077</a> | 4.561696656 | 2.189571 | 3.58E-07 | 2.96E-06 |
| RERGL        | <a href="#">113257835</a> | 4.557411057 | 2.188215 | 0.000253 | 0.001147 |
| LOC113245319 | <a href="#">113245319</a> | 4.557249157 | 2.188163 | 0.002256 | 0.007816 |
| MYPOP        | <a href="#">113243407</a> | 4.551043222 | 2.186197 | 1.9E-06  | 1.38E-05 |
| SYN1         | <a href="#">113265974</a> | 4.545954548 | 2.184583 | 5.48E-05 | 0.000291 |
| MAPRE3       | <a href="#">113270924</a> | 4.535290107 | 2.181195 | 5.97E-05 | 0.000315 |

|              |                           |             |          |          |          |
|--------------|---------------------------|-------------|----------|----------|----------|
| ATP5PB       | <a href="#">113244431</a> | 4.535215669 | 2.181171 | 0.000435 | 0.00185  |
| MRPS24       | <a href="#">113257987</a> | 4.530834622 | 2.179777 | 5.94E-08 | 5.71E-07 |
| ATP5PD       | <a href="#">113244651</a> | 4.530074077 | 2.179535 | 0.000312 | 0.001383 |
| HSF4         | <a href="#">113252349</a> | 4.521528408 | 2.176811 | 0.000108 | 0.000536 |
| PAM16        | <a href="#">113270852</a> | 4.517055085 | 2.175383 | 4.24E-08 | 4.2E-07  |
| CLIP1        | <a href="#">113266923</a> | 4.516352661 | 2.175158 | 7.4E-06  | 4.82E-05 |
| RASSF8       | <a href="#">113257786</a> | 4.512926943 | 2.174063 | 1.95E-07 | 1.7E-06  |
| LOC113264441 | <a href="#">113264441</a> | 4.504072863 | 2.17123  | 5.39E-05 | 0.000286 |
| VSIG10L      | <a href="#">113247243</a> | 4.500321071 | 2.170028 | 8.84E-05 | 0.000449 |
| ATP5F1B      | <a href="#">113256410</a> | 4.498354309 | 2.169397 | 0.003664 | 0.011886 |
| THBS2        | <a href="#">113247125</a> | 4.494986643 | 2.168317 | 0.006076 | 0.018431 |
| SLC2A4RG     | <a href="#">113258822</a> | 4.49131406  | 2.167138 | 7.06E-06 | 4.61E-05 |
| PYURF        | <a href="#">113263153</a> | 4.489861547 | 2.166671 | 1.31E-07 | 1.18E-06 |
| NDUFB8       | <a href="#">113251835</a> | 4.489064163 | 2.166415 | 3.95E-06 | 2.72E-05 |
| IMPDH2       | <a href="#">113256856</a> | 4.48469474  | 2.16501  | 0.000203 | 0.000942 |
| SMIM26       | <a href="#">113258309</a> | 4.478474566 | 2.163007 | 9.85E-07 | 7.52E-06 |
| ZNF579       | <a href="#">113247353</a> | 4.477947008 | 2.162837 | 2.4E-08  | 2.46E-07 |
| LEAP2        | <a href="#">113261728</a> | 4.476806722 | 2.16247  | 0.000265 | 0.001195 |
| TSLP         | <a href="#">113254959</a> | 4.475269942 | 2.161975 | 0.000423 | 0.001808 |
| KREMEN1      | <a href="#">113245007</a> | 4.462405626 | 2.157822 | 1.69E-05 | 0.000101 |
| SLC6A8       | <a href="#">113247834</a> | 4.46073902  | 2.157283 | 1.89E-07 | 1.65E-06 |
| MPPED2       | <a href="#">113265079</a> | 4.455032552 | 2.155436 | 0.00019  | 0.000888 |
| NFATC1       | <a href="#">113253544</a> | 4.454581846 | 2.15529  | 4.64E-08 | 4.55E-07 |
| SERHL2       | <a href="#">113241696</a> | 4.454385124 | 2.155226 | 6.27E-05 | 0.00033  |
| KCNMB2       | <a href="#">113254860</a> | 4.449935514 | 2.153784 | 0.000377 | 0.001633 |
| SMIM12       | <a href="#">113268319</a> | 4.448409515 | 2.15329  | 1.17E-07 | 1.06E-06 |
| DPH3         | <a href="#">113253905</a> | 4.444907507 | 2.152153 | 2.72E-07 | 2.3E-06  |
| ATP8B3       | <a href="#">113242657</a> | 4.436335544 | 2.149368 | 0.000921 | 0.00358  |

|          |                           |             |          |          |          |
|----------|---------------------------|-------------|----------|----------|----------|
| DHDH     | <a href="#">113243321</a> | 4.436195559 | 2.149323 | 0.001094 | 0.004163 |
| DNAJB6   | <a href="#">113241530</a> | 4.434751064 | 2.148853 | 7.28E-08 | 6.92E-07 |
| NDUFC2   | <a href="#">113269364</a> | 4.428130344 | 2.146698 | 8.04E-07 | 6.24E-06 |
| FMO2     | <a href="#">113262845</a> | 4.42664973  | 2.146215 | 2.12E-06 | 1.52E-05 |
| RAB12    | <a href="#">113253223</a> | 4.425734367 | 2.145917 | 1.39E-07 | 1.25E-06 |
| OPTN     | <a href="#">113241074</a> | 4.425208502 | 2.145745 | 1.15E-05 | 7.17E-05 |
| ABCA5    | <a href="#">113265229</a> | 4.420612284 | 2.144246 | 6.71E-08 | 6.41E-07 |
| HMCN1    | <a href="#">113262754</a> | 4.416665253 | 2.142957 | 3.74E-05 | 0.000206 |
| GTF3A    | <a href="#">113251205</a> | 4.412226894 | 2.141507 | 5.24E-08 | 5.1E-07  |
| JUN      | <a href="#">113254611</a> | 4.397946738 | 2.13683  | 1.88E-06 | 1.36E-05 |
| SLC16A10 | <a href="#">113264727</a> | 4.392778297 | 2.135134 | 4.82E-06 | 3.27E-05 |
| NMS      | <a href="#">113247084</a> | 4.39199225  | 2.134876 | 0.000262 | 0.001184 |
| BTC      | <a href="#">113263271</a> | 4.376733562 | 2.129855 | 0.000453 | 0.001918 |
| SLC20A2  | <a href="#">113245534</a> | 4.376228241 | 2.129688 | 1.02E-05 | 6.42E-05 |
| PIGY     | <a href="#">113263154</a> | 4.375063498 | 2.129304 | 5.61E-07 | 4.48E-06 |
| KCNJ2    | <a href="#">113265224</a> | 4.356441672 | 2.12315  | 0.000404 | 0.001739 |
| RASGRF2  | <a href="#">113255154</a> | 4.356300926 | 2.123104 | 6.31E-07 | 4.99E-06 |
| CDC34    | <a href="#">113242694</a> | 4.355551984 | 2.122856 | 1.63E-05 | 9.78E-05 |
| ZNF32    | <a href="#">113243142</a> | 4.34553578  | 2.119534 | 1.53E-06 | 1.13E-05 |
| TRMT12   | <a href="#">113252745</a> | 4.342817029 | 2.118631 | 5.25E-07 | 4.21E-06 |
| ZNF30    | <a href="#">113244783</a> | 4.342500574 | 2.118526 | 9.2E-06  | 5.86E-05 |
| EGLN1    | <a href="#">113259033</a> | 4.342314107 | 2.118464 | 7.61E-08 | 7.21E-07 |
| PAR6A    | <a href="#">113252374</a> | 4.33358364  | 2.115561 | 0.000371 | 0.001613 |
| TBC1D4   | <a href="#">113251422</a> | 4.329015358 | 2.114039 | 1.11E-07 | 1.01E-06 |
| TMEM108  | <a href="#">113253944</a> | 4.325687774 | 2.11293  | 5.28E-05 | 0.000282 |
| LACTB2   | <a href="#">113253065</a> | 4.321230847 | 2.111442 | 1.89E-07 | 1.65E-06 |
| NDUFB6   | <a href="#">113260540</a> | 4.314698538 | 2.10926  | 1.49E-06 | 1.1E-05  |
| ALKBH3   | <a href="#">113265015</a> | 4.314252031 | 2.10911  | 1.54E-08 | 1.64E-07 |

|              |                           |             |          |          |          |
|--------------|---------------------------|-------------|----------|----------|----------|
| CHRM4        | <a href="#">113264986</a> | 4.311736002 | 2.108269 | 0.00064  | 0.002609 |
| MANEAL       | <a href="#">113268270</a> | 4.307699492 | 2.106918 | 0.000112 | 0.000557 |
| MEF2D        | <a href="#">113245229</a> | 4.307003588 | 2.106685 | 5.42E-08 | 5.26E-07 |
| SFXN4        | <a href="#">113251991</a> | 4.306582053 | 2.106543 | 1.07E-07 | 9.78E-07 |
| LIMCH1       | <a href="#">113262439</a> | 4.304482081 | 2.10584  | 1.42E-05 | 8.63E-05 |
| BBS5         | <a href="#">113250801</a> | 4.302286775 | 2.105104 | 0.000195 | 0.000912 |
| ZDHHC1       | <a href="#">113252362</a> | 4.30146684  | 2.104829 | 1.42E-05 | 8.63E-05 |
| PROCA1       | <a href="#">113269040</a> | 4.296028313 | 2.103004 | 1.44E-06 | 1.07E-05 |
| MRPL12       | <a href="#">113244509</a> | 4.295070502 | 2.102682 | 2.59E-07 | 2.19E-06 |
| EVA1C        | <a href="#">113265647</a> | 4.290495384 | 2.101144 | 8.16E-05 | 0.000418 |
| LOC113241107 | <a href="#">113241107</a> | 4.285042243 | 2.099309 | 2.61E-05 | 0.000149 |
| ECPAS        | <a href="#">113260320</a> | 4.282533375 | 2.098464 | 0.000118 | 0.000583 |
| DST          | <a href="#">113261161</a> | 4.280889485 | 2.097911 | 3.36E-05 | 0.000187 |
| EPHA4        | <a href="#">113250413</a> | 4.278272915 | 2.097029 | 0.000117 | 0.000579 |
| WNT10B       | <a href="#">113257662</a> | 4.270749728 | 2.094489 | 0.000307 | 0.001367 |
| APOO         | <a href="#">113242225</a> | 4.270280369 | 2.094331 | 1.18E-06 | 8.89E-06 |
| RASSF9       | <a href="#">113256205</a> | 4.26931494  | 2.094005 | 0.000526 | 0.002195 |
| TARSL2       | <a href="#">113263620</a> | 4.267616578 | 2.093431 | 4.15E-07 | 3.4E-06  |
| NDUFA6       | <a href="#">113241708</a> | 4.266184849 | 2.092946 | 1.75E-07 | 1.54E-06 |
| ZBTB16       | <a href="#">113260036</a> | 4.24982606  | 2.087404 | 1.04E-06 | 7.94E-06 |
| WNT4         | <a href="#">113268542</a> | 4.248253429 | 2.08687  | 0.000584 | 0.00241  |
| PLEKHM2      | <a href="#">113270664</a> | 4.245444324 | 2.085916 | 0.000313 | 0.001389 |
| NR4A2        | <a href="#">113250870</a> | 4.242651123 | 2.084966 | 0.000452 | 0.001916 |
| FHL5         | <a href="#">113264813</a> | 4.239836849 | 2.084009 | 0.000607 | 0.002489 |
| PGPEP1       | <a href="#">113256715</a> | 4.234070833 | 2.082045 | 9.51E-08 | 8.78E-07 |
| PHKB         | <a href="#">113252209</a> | 4.23405246  | 2.082039 | 1.97E-06 | 1.42E-05 |
| MLLT11       | <a href="#">113246131</a> | 4.22653532  | 2.079476 | 4.41E-08 | 4.36E-07 |
| R3HDM2       | <a href="#">113256386</a> | 4.222824325 | 2.078208 | 4.6E-05  | 0.000248 |

|              |                           |             |          |          |          |
|--------------|---------------------------|-------------|----------|----------|----------|
| KPNA4        | <a href="#">113254139</a> | 4.22064132  | 2.077462 | 1.94E-05 | 0.000114 |
| GPR17        | <a href="#">113263488</a> | 4.220098925 | 2.077277 | 0.000415 | 0.001778 |
| FGF1         | <a href="#">113255360</a> | 4.218316536 | 2.076667 | 3.56E-05 | 0.000197 |
| PDE8A        | <a href="#">113263738</a> | 4.218252776 | 2.076646 | 6.17E-07 | 4.89E-06 |
| WWP1         | <a href="#">113252973</a> | 4.217108757 | 2.076254 | 1.89E-05 | 0.000112 |
| KIF13A       | <a href="#">113264500</a> | 4.216663332 | 2.076102 | 3.55E-06 | 2.46E-05 |
| UBL4A        | <a href="#">113247812</a> | 4.216429425 | 2.076022 | 3.99E-07 | 3.27E-06 |
| PRRX1        | <a href="#">113262848</a> | 4.209858507 | 2.073772 | 3.37E-05 | 0.000187 |
| KLHL24       | <a href="#">113254479</a> | 4.208477995 | 2.073299 | 2.56E-07 | 2.17E-06 |
| ZFP37        | <a href="#">113266304</a> | 4.203456897 | 2.071576 | 7.66E-05 | 0.000394 |
| MMACHC       | <a href="#">113254743</a> | 4.201090669 | 2.070764 | 1.09E-05 | 6.87E-05 |
| ITGB4        | <a href="#">113244620</a> | 4.193272817 | 2.068077 | 8.74E-06 | 5.6E-05  |
| KLHL4        | <a href="#">113242173</a> | 4.186142972 | 2.065622 | 0.000222 | 0.001026 |
| ATP5F1D      | <a href="#">113242724</a> | 4.181534895 | 2.064033 | 0.000108 | 0.000536 |
| UBR3         | <a href="#">113250793</a> | 4.176652239 | 2.062347 | 1.19E-05 | 7.41E-05 |
| SEPT11       | <a href="#">113263245</a> | 4.174966201 | 2.061765 | 1.72E-07 | 1.52E-06 |
| LOC113271232 | <a href="#">113271232</a> | 4.167411137 | 2.059151 | 0.000237 | 0.001084 |
| MUL1         | <a href="#">113268565</a> | 4.166976009 | 2.059001 | 2.21E-07 | 1.9E-06  |
| HOXC8        | <a href="#">113257531</a> | 4.165178301 | 2.058378 | 0.014055 | 0.037336 |
| CARNMT1      | <a href="#">113269844</a> | 4.164692229 | 2.05821  | 2.07E-07 | 1.79E-06 |
| LOC113255247 | <a href="#">113255247</a> | 4.16329449  | 2.057726 | 1.84E-05 | 0.000109 |
| TEX2         | <a href="#">113265274</a> | 4.162424807 | 2.057424 | 5.9E-06  | 3.92E-05 |
| AMN1         | <a href="#">113257748</a> | 4.162101096 | 2.057312 | 7.24E-07 | 5.67E-06 |
| NFE2L1       | <a href="#">113265569</a> | 4.161381194 | 2.057062 | 4.84E-05 | 0.00026  |
| LOC113267950 | <a href="#">113267950</a> | 4.159962606 | 2.056571 | 8.16E-05 | 0.000418 |
| KRTCAP3      | <a href="#">113271234</a> | 4.159795322 | 2.056513 | 8.86E-05 | 0.000449 |
| PFN2         | <a href="#">113254055</a> | 4.157565657 | 2.055739 | 5.87E-05 | 0.00031  |
| TMEM136      | <a href="#">113259949</a> | 4.155904664 | 2.055163 | 4.45E-06 | 3.03E-05 |

|              |                           |             |          |          |          |
|--------------|---------------------------|-------------|----------|----------|----------|
| RELN         | <a href="#">113258887</a> | 4.151154847 | 2.053513 | 5.59E-05 | 0.000296 |
| FBXL22       | <a href="#">113240838</a> | 4.150241397 | 2.053195 | 0.000116 | 0.000573 |
| TOMM20       | <a href="#">113259006</a> | 4.139755496 | 2.049546 | 1.45E-05 | 8.81E-05 |
| TLN2         | <a href="#">113269702</a> | 4.138270747 | 2.049028 | 9.14E-06 | 5.82E-05 |
| PNPLA4       | <a href="#">113240758</a> | 4.136742947 | 2.048495 | 6.59E-06 | 4.33E-05 |
| CLIC5        | <a href="#">113261239</a> | 4.135311168 | 2.047996 | 1.68E-05 | 0.0001   |
| RRAGB        | <a href="#">113247969</a> | 4.13393493  | 2.047516 | 3.66E-07 | 3.02E-06 |
| FAM180B      | <a href="#">113264952</a> | 4.13102556  | 2.0465   | 0.002374 | 0.008163 |
| ANKRD9       | <a href="#">113267237</a> | 4.130931855 | 2.046467 | 3.66E-07 | 3.01E-06 |
| NDUFB7       | <a href="#">113247157</a> | 4.129473203 | 2.045958 | 1.6E-07  | 1.42E-06 |
| HSCB         | <a href="#">113245003</a> | 4.129402962 | 2.045933 | 4.48E-07 | 3.64E-06 |
| PABPC4       | <a href="#">113268249</a> | 4.127203821 | 2.045165 | 0.000167 | 0.000795 |
| ATP6V1G2     | <a href="#">113243710</a> | 4.126183016 | 2.044808 | 0.000181 | 0.000857 |
| FUNDC2       | <a href="#">113248346</a> | 4.12503991  | 2.044408 | 5.79E-07 | 4.6E-06  |
| TMEM161A     | <a href="#">113256742</a> | 4.122038757 | 2.043358 | 1.39E-07 | 1.25E-06 |
| RBFOX2       | <a href="#">113255999</a> | 4.12072284  | 2.042897 | 1.52E-05 | 9.17E-05 |
| SPATA24      | <a href="#">113261807</a> | 4.118593142 | 2.042152 | 0.000184 | 0.000868 |
| UBALD1       | <a href="#">113270843</a> | 4.111761441 | 2.039757 | 1.07E-07 | 9.81E-07 |
| COL4A4       | <a href="#">113250384</a> | 4.107943586 | 2.038416 | 0.001005 | 0.00387  |
| ATP5ME       | <a href="#">113245737</a> | 4.098735652 | 2.035179 | 4.14E-05 | 0.000225 |
| AGL          | <a href="#">113254363</a> | 4.097772001 | 2.03484  | 9.53E-05 | 0.00048  |
| NDUFS2       | <a href="#">113246718</a> | 4.095137646 | 2.033912 | 0.000278 | 0.001247 |
| SMIM1        | <a href="#">113270590</a> | 4.08809008  | 2.031427 | 1.98E-07 | 1.72E-06 |
| LOC113248801 | <a href="#">113248801</a> | 4.087076884 | 2.031069 | 0.000958 | 0.003708 |
| FAM131A      | <a href="#">113254262</a> | 4.086332039 | 2.030806 | 7.7E-07  | 5.99E-06 |
| RGS5         | <a href="#">113268681</a> | 4.07691845  | 2.027479 | 3.76E-05 | 0.000207 |
| CAMSAP1      | <a href="#">113266592</a> | 4.075745948 | 2.027064 | 8.14E-08 | 7.65E-07 |
| TMCC3        | <a href="#">113256152</a> | 4.074911414 | 2.026769 | 3.74E-05 | 0.000206 |

|              |                           |             |          |          |          |
|--------------|---------------------------|-------------|----------|----------|----------|
| NDUFS1       | <a href="#">113250544</a> | 4.066890228 | 2.023926 | 0.000103 | 0.000516 |
| PER2         | <a href="#">113249994</a> | 4.058257955 | 2.020861 | 3.27E-06 | 2.27E-05 |
| RDH14        | <a href="#">113270195</a> | 4.053619162 | 2.019211 | 1.92E-06 | 1.39E-05 |
| EGR1         | <a href="#">113261792</a> | 4.051715409 | 2.018533 | 6.34E-06 | 4.18E-05 |
| ASB8         | <a href="#">113257679</a> | 4.049849317 | 2.017868 | 3.98E-07 | 3.27E-06 |
| CUL5         | <a href="#">113260213</a> | 4.049377129 | 2.0177   | 8.47E-08 | 7.92E-07 |
| HIVEP2       | <a href="#">113259505</a> | 4.046843153 | 2.016797 | 1.62E-08 | 1.72E-07 |
| NDUFB4       | <a href="#">113252045</a> | 4.043033156 | 2.015438 | 1.81E-06 | 1.32E-05 |
| LOC113262535 | <a href="#">113262535</a> | 4.037970685 | 2.01363  | 5.29E-06 | 3.55E-05 |
| MFF          | <a href="#">113250383</a> | 4.036782188 | 2.013206 | 1.26E-05 | 7.77E-05 |
| AKAP1        | <a href="#">113268847</a> | 4.033968049 | 2.0122   | 1.39E-06 | 1.03E-05 |
| LOC113249853 | <a href="#">113249853</a> | 4.020081521 | 2.007225 | 0.001319 | 0.004908 |
| TSPAN15      | <a href="#">113258877</a> | 4.019772276 | 2.007114 | 0.000661 | 0.002682 |
| UBXN6        | <a href="#">113242833</a> | 4.01906     | 2.006858 | 5.3E-05  | 0.000282 |
| DNAJC19      | <a href="#">113254646</a> | 4.012187675 | 2.004389 | 2.02E-06 | 1.45E-05 |
| NREP         | <a href="#">113254998</a> | 4.002028071 | 2.000731 | 9.66E-06 | 6.12E-05 |
| CCDC43       | <a href="#">113265348</a> | 3.99904936  | 1.999657 | 2.42E-07 | 2.07E-06 |
| GPR21        | <a href="#">113266387</a> | 3.998009682 | 1.999282 | 0.000501 | 0.002103 |
| FBXO31       | <a href="#">113252169</a> | 3.997940902 | 1.999257 | 2.87E-05 | 0.000162 |
| TTC33        | <a href="#">113260928</a> | 3.997247036 | 1.999007 | 9.87E-07 | 7.53E-06 |
| CAMK2G       | <a href="#">113259192</a> | 3.996334056 | 1.998677 | 3.96E-05 | 0.000216 |
| DMD          | <a href="#">113265965</a> | 3.993562762 | 1.997676 | 5.4E-05  | 0.000287 |
| ZNF770       | <a href="#">113242069</a> | 3.993032363 | 1.997485 | 3.71E-07 | 3.05E-06 |
| HMGN3        | <a href="#">113261087</a> | 3.992598334 | 1.997328 | 4.32E-07 | 3.53E-06 |
| LOC113247902 | <a href="#">113247902</a> | 3.989548809 | 1.996226 | 0.000607 | 0.002491 |
| CHRNA1       | <a href="#">113250753</a> | 3.988745087 | 1.995935 | 0.000228 | 0.001045 |
| COQ7         | <a href="#">113270738</a> | 3.988084658 | 1.995696 | 3.95E-06 | 2.72E-05 |
| SLC25A20     | <a href="#">113256849</a> | 3.987713349 | 1.995562 | 1.35E-05 | 8.27E-05 |

|              |                           |             |          |          |          |
|--------------|---------------------------|-------------|----------|----------|----------|
| LZTS3        | <a href="#">113258399</a> | 3.985565032 | 1.994784 | 8.66E-05 | 0.000441 |
| IDH3B        | <a href="#">113258411</a> | 3.982968404 | 1.993844 | 5.09E-05 | 0.000273 |
| TWF2         | <a href="#">113256944</a> | 3.975715508 | 1.991215 | 7E-05    | 0.000364 |
| IGDCC4       | <a href="#">113241013</a> | 3.97353948  | 1.990425 | 2.47E-07 | 2.11E-06 |
| PDLIM7       | <a href="#">113264157</a> | 3.970432078 | 1.989296 | 6.55E-07 | 5.17E-06 |
| NDUFAF5      | <a href="#">113258328</a> | 3.96883445  | 1.988715 | 2.75E-05 | 0.000156 |
| HOXC9        | <a href="#">113257530</a> | 3.956446757 | 1.984205 | 0.002072 | 0.007251 |
| LOC113246178 | <a href="#">113246178</a> | 3.952464885 | 1.982753 | 1.64E-07 | 1.46E-06 |
| ISYNA1       | <a href="#">113256718</a> | 3.950539913 | 1.98205  | 7.59E-05 | 0.000391 |
| LOC113254727 | <a href="#">113254727</a> | 3.950483699 | 1.982029 | 0.000105 | 0.000525 |
| ATF3         | <a href="#">113262677</a> | 3.950300408 | 1.981962 | 3.97E-05 | 0.000217 |
| LOC113243815 | <a href="#">113243815</a> | 3.946587306 | 1.980606 | 2.02E-06 | 1.46E-05 |
| HADHB        | <a href="#">113270781</a> | 3.942160329 | 1.978986 | 0.000617 | 0.002527 |
| EIF4EBP1     | <a href="#">113262099</a> | 3.941308331 | 1.978675 | 5.23E-06 | 3.51E-05 |
| DEPTOR       | <a href="#">113252772</a> | 3.939841863 | 1.978138 | 5.72E-06 | 3.81E-05 |
| LOC113248580 | <a href="#">113248580</a> | 3.930596699 | 1.974748 | 1.38E-05 | 8.43E-05 |
| ZNF503       | <a href="#">113259209</a> | 3.928341924 | 1.973921 | 5.47E-07 | 4.37E-06 |
| KIF26A       | <a href="#">113267199</a> | 3.927020843 | 1.973435 | 1.74E-05 | 0.000104 |
| LOC113246863 | <a href="#">113246863</a> | 3.926702902 | 1.973318 | 0.001765 | 0.006308 |
| TRMT2B       | <a href="#">113244297</a> | 3.924733079 | 1.972595 | 0.000265 | 0.001197 |
| PFDN1        | <a href="#">113261816</a> | 3.922935319 | 1.971934 | 3.73E-07 | 3.07E-06 |
| COQ5         | <a href="#">113267040</a> | 3.921745646 | 1.971496 | 7.52E-07 | 5.86E-06 |
| TTC19        | <a href="#">113271258</a> | 3.915333658 | 1.969135 | 3.47E-07 | 2.88E-06 |
| ZSCAN9       | <a href="#">113248163</a> | 3.911955053 | 1.96789  | 0.000313 | 0.001388 |
| RASSF4       | <a href="#">113243126</a> | 3.906260256 | 1.965788 | 4.1E-06  | 2.81E-05 |
| NDUFB2       | <a href="#">113265140</a> | 3.903614752 | 1.964811 | 7.65E-06 | 4.96E-05 |
| LOC113259016 | <a href="#">113259016</a> | 3.900719432 | 1.96374  | 6.57E-06 | 4.32E-05 |
| INPP5E       | <a href="#">113248636</a> | 3.897670056 | 1.962612 | 4.61E-05 | 0.000248 |

|              |                           |             |          |          |          |
|--------------|---------------------------|-------------|----------|----------|----------|
| LOC113267907 | <a href="#">113267907</a> | 3.896845459 | 1.962307 | 0.000295 | 0.001318 |
| LOC113247923 | <a href="#">113247923</a> | 3.894579431 | 1.961468 | 0.000349 | 0.001527 |
| BLCAP        | <a href="#">113258579</a> | 3.894471648 | 1.961428 | 0.000213 | 0.000988 |
| DMAC1        | <a href="#">113260618</a> | 3.885760421 | 1.958197 | 5E-07    | 4.02E-06 |
| LOC113246288 | <a href="#">113246288</a> | 3.879045538 | 1.955702 | 0.001244 | 0.004663 |
| ADAMTS1      | <a href="#">113269052</a> | 3.876470993 | 1.954744 | 5.07E-06 | 3.42E-05 |
| NFKBIL1      | <a href="#">113243709</a> | 3.872627078 | 1.953313 | 9.84E-07 | 7.52E-06 |
| CRY2         | <a href="#">113264999</a> | 3.867975785 | 1.951579 | 6.19E-06 | 4.1E-05  |
| SOX7         | <a href="#">113269935</a> | 3.85541899  | 1.946888 | 0.000346 | 0.001515 |
| ADGRA3       | <a href="#">113266735</a> | 3.853370354 | 1.946121 | 1.29E-06 | 9.64E-06 |
| ADRA2C       | <a href="#">113245678</a> | 3.850523892 | 1.945055 | 0.00389  | 0.012499 |
| TCHH         | <a href="#">113246136</a> | 3.849282321 | 1.944589 | 0.007877 | 0.022912 |
| ACCSL        | <a href="#">113265013</a> | 3.845553963 | 1.943191 | 0.000644 | 0.002623 |
| CACNA1D      | <a href="#">113256986</a> | 3.844295277 | 1.942719 | 0.00033  | 0.001453 |
| FMO1         | <a href="#">113262844</a> | 3.843777181 | 1.942525 | 0.002975 | 0.009955 |
| LOC113261786 | <a href="#">113261786</a> | 3.83742467  | 1.940138 | 0.000541 | 0.002248 |
| UBE2G1       | <a href="#">113271043</a> | 3.836993523 | 1.939976 | 0.000127 | 0.000618 |
| SLC16A11     | <a href="#">113271101</a> | 3.833046882 | 1.938492 | 0.000871 | 0.003415 |
| BLOC1S1      | <a href="#">113256461</a> | 3.830454079 | 1.937515 | 3.78E-05 | 0.000208 |
| RHOBTB3      | <a href="#">113255075</a> | 3.829117057 | 1.937012 | 2.74E-05 | 0.000156 |
| FILIP1L      | <a href="#">113250483</a> | 3.826354623 | 1.935971 | 5.56E-07 | 4.44E-06 |
| NIM1K        | <a href="#">113260953</a> | 3.825634634 | 1.935699 | 0.00321  | 0.010609 |
| TMEM252      | <a href="#">113270191</a> | 3.824024607 | 1.935092 | 0.003358 | 0.011027 |
| MIB1         | <a href="#">113253275</a> | 3.823556501 | 1.934915 | 1.43E-05 | 8.7E-05  |
| ZNF185       | <a href="#">113246825</a> | 3.821878687 | 1.934282 | 0.006224 | 0.018816 |
| SDHD         | <a href="#">113260049</a> | 3.818504196 | 1.933008 | 0.000135 | 0.000653 |
| TRAK1        | <a href="#">113253818</a> | 3.814270762 | 1.931407 | 2.07E-05 | 0.000121 |
| CSDE1        | <a href="#">113244393</a> | 3.812466253 | 1.930725 | 0.007437 | 0.021806 |

|              |                           |             |          |          |          |
|--------------|---------------------------|-------------|----------|----------|----------|
| NUDT8        | <a href="#">113244016</a> | 3.810721889 | 1.930064 | 0.000197 | 0.000917 |
| RPP40        | <a href="#">113264415</a> | 3.809678004 | 1.929669 | 8.55E-05 | 0.000436 |
| RNF128       | <a href="#">113241221</a> | 3.809557321 | 1.929623 | 0.010747 | 0.029637 |
| TMEM185A     | <a href="#">113241899</a> | 3.808124663 | 1.929081 | 1.26E-07 | 1.14E-06 |
| NDUFV1       | <a href="#">113244014</a> | 3.805938183 | 1.928252 | 9.2E-05  | 0.000464 |
| CST6         | <a href="#">113244082</a> | 3.805647596 | 1.928142 | 0.000113 | 0.000562 |
| MRPL45       | <a href="#">113265550</a> | 3.804602253 | 1.927746 | 1.05E-05 | 6.61E-05 |
| NT5C3A       | <a href="#">113262512</a> | 3.804600039 | 1.927745 | 9.17E-06 | 5.84E-05 |
| MYOC         | <a href="#">113262839</a> | 3.803393309 | 1.927287 | 0.016194 | 0.042128 |
| LOC113248593 | <a href="#">113248593</a> | 3.796438562 | 1.924647 | 6.74E-07 | 5.3E-06  |
| DNAJB1       | <a href="#">113247153</a> | 3.795523186 | 1.924299 | 5.77E-07 | 4.59E-06 |
| LOC113260369 | <a href="#">113260369</a> | 3.79468662  | 1.923981 | 1.12E-05 | 7.02E-05 |
| ADAMTSL2     | <a href="#">113266573</a> | 3.794410633 | 1.923876 | 0.000177 | 0.000838 |
| PREPL        | <a href="#">113246215</a> | 3.793631641 | 1.92358  | 3.1E-07  | 2.59E-06 |
| ATP5MF       | <a href="#">113267913</a> | 3.792405215 | 1.923113 | 2.22E-06 | 1.59E-05 |
| TBRG4        | <a href="#">113257719</a> | 3.784260079 | 1.920011 | 2.91E-05 | 0.000165 |
| GRASP        | <a href="#">113257465</a> | 3.782491444 | 1.919337 | 5.44E-05 | 0.000289 |
| MSI2         | <a href="#">113268852</a> | 3.77986431  | 1.918334 | 3.61E-07 | 2.98E-06 |
| TMEM11       | <a href="#">113271315</a> | 3.779381716 | 1.91815  | 1.14E-06 | 8.62E-06 |
| NDUFAF2      | <a href="#">113255305</a> | 3.775868104 | 1.916808 | 0.000761 | 0.003036 |
| NDUFS6       | <a href="#">113260793</a> | 3.774786582 | 1.916395 | 3.06E-06 | 2.14E-05 |
| GOLGA4       | <a href="#">113253773</a> | 3.770632602 | 1.914807 | 7.78E-05 | 0.0004   |
| CALR3        | <a href="#">113256650</a> | 3.770474155 | 1.914746 | 0.00055  | 0.00228  |
| DEXI         | <a href="#">113270801</a> | 3.767847945 | 1.913741 | 8.17E-07 | 6.34E-06 |
| LOC113246871 | <a href="#">113246871</a> | 3.763990755 | 1.912263 | 2.32E-06 | 1.65E-05 |
| LOC113264253 | <a href="#">113264253</a> | 3.762002117 | 1.911501 | 0.000197 | 0.000917 |
| TMOD1        | <a href="#">113260426</a> | 3.761371318 | 1.911259 | 0.00014  | 0.000676 |
| VAMP2        | <a href="#">113271170</a> | 3.761354847 | 1.911252 | 3.85E-06 | 2.65E-05 |

|              |                           |             |          |          |          |
|--------------|---------------------------|-------------|----------|----------|----------|
| PPM1L        | <a href="#">113254142</a> | 3.758561175 | 1.91018  | 2.06E-05 | 0.00012  |
| NOS3         | <a href="#">113241474</a> | 3.757553192 | 1.909794 | 1.25E-05 | 7.72E-05 |
| DMAC2L       | <a href="#">113266076</a> | 3.75632709  | 1.909323 | 7.66E-05 | 0.000394 |
| REPIN1       | <a href="#">113241464</a> | 3.753905154 | 1.908392 | 1.61E-07 | 1.43E-06 |
| CELF5        | <a href="#">113242796</a> | 3.752849238 | 1.907986 | 0.00181  | 0.006454 |
| EPB41L4B     | <a href="#">113260640</a> | 3.749679863 | 1.906767 | 0.000149 | 0.000715 |
| AMACR        | <a href="#">113260868</a> | 3.748598083 | 1.906351 | 1.66E-05 | 9.9E-05  |
| CUNH3orf18   | <a href="#">113256920</a> | 3.74835387  | 1.906257 | 0.00078  | 0.003101 |
| TMEM184A     | <a href="#">113247730</a> | 3.742373001 | 1.903953 | 0.00104  | 0.003981 |
| IGFALS       | <a href="#">113245094</a> | 3.742304539 | 1.903927 | 1.03E-05 | 6.52E-05 |
| SMIM20       | <a href="#">113266763</a> | 3.740271041 | 1.903143 | 9.98E-06 | 6.31E-05 |
| SBDS         | <a href="#">113267760</a> | 3.740005167 | 1.90304  | 5.13E-06 | 3.45E-05 |
| KCNN3        | <a href="#">113245302</a> | 3.732582874 | 1.900174 | 0.000389 | 0.001682 |
| OXA1L        | <a href="#">113246043</a> | 3.729845145 | 1.899116 | 0.000117 | 0.000576 |
| LCMT1        | <a href="#">113267594</a> | 3.72913362  | 1.89884  | 1.2E-06  | 8.98E-06 |
| SLC4A3       | <a href="#">113250414</a> | 3.728332035 | 1.89853  | 0.000489 | 0.002057 |
| HEYL         | <a href="#">113268247</a> | 3.728261085 | 1.898503 | 5.07E-07 | 4.07E-06 |
| LOC113246846 | <a href="#">113246846</a> | 3.716889029 | 1.894096 | 6.56E-06 | 4.32E-05 |
| LRRC43       | <a href="#">113266928</a> | 3.71688257  | 1.894093 | 0.001059 | 0.004045 |
| TEF          | <a href="#">113241732</a> | 3.714435706 | 1.893143 | 6.57E-06 | 4.32E-05 |
| MALL         | <a href="#">113242244</a> | 3.710609646 | 1.891656 | 0.00064  | 0.002609 |
| MEIOC        | <a href="#">113265676</a> | 3.708354466 | 1.890779 | 0.000312 | 0.001383 |
| TSNARE1      | <a href="#">113247953</a> | 3.700501604 | 1.887721 | 0.000125 | 0.000611 |
| LOC113247922 | <a href="#">113247922</a> | 3.695477365 | 1.885761 | 1.27E-05 | 7.8E-05  |
| POMGNT1      | <a href="#">113254729</a> | 3.692434443 | 1.884572 | 8.11E-06 | 5.22E-05 |
| GYG1         | <a href="#">113254042</a> | 3.691748289 | 1.884304 | 0.000867 | 0.003403 |
| CUNH6orf106  | <a href="#">113243827</a> | 3.690584246 | 1.883849 | 0.000256 | 0.00116  |
| LOC113242783 | <a href="#">113242783</a> | 3.684791335 | 1.881583 | 0.000235 | 0.001076 |

|              |                           |             |          |          |          |
|--------------|---------------------------|-------------|----------|----------|----------|
| LOC113254636 | <a href="#">113254636</a> | 3.681904493 | 1.880452 | 3.77E-06 | 2.6E-05  |
| NDUFA4L2     | <a href="#">113256390</a> | 3.677301083 | 1.878647 | 0.001745 | 0.006249 |
| LOC113247877 | <a href="#">113247877</a> | 3.676961928 | 1.878514 | 0.001742 | 0.006242 |
| POLDIP2      | <a href="#">113269025</a> | 3.676221558 | 1.878224 | 4.13E-06 | 2.82E-05 |
| CDKL5        | <a href="#">113242254</a> | 3.675688127 | 1.878014 | 0.00034  | 0.00149  |
| LOC113241423 | <a href="#">113241423</a> | 3.667294269 | 1.874716 | 0.000627 | 0.00256  |
| ACTR3B       | <a href="#">113241507</a> | 3.657492366 | 1.870855 | 1.11E-06 | 8.39E-06 |
| EEF1D        | <a href="#">113247655</a> | 3.65569526  | 1.870146 | 0.001422 | 0.005241 |
| RASD2        | <a href="#">113256004</a> | 3.653705827 | 1.86936  | 0.001031 | 0.003954 |
| CATSPERD     | <a href="#">113242861</a> | 3.65150505  | 1.868491 | 0.001273 | 0.004759 |
| ATPAF1       | <a href="#">113254713</a> | 3.650832753 | 1.868226 | 1.08E-06 | 8.19E-06 |
| SPOCK2       | <a href="#">113259155</a> | 3.650575148 | 1.868124 | 2.17E-05 | 0.000126 |
| ROMO1        | <a href="#">113258545</a> | 3.65005854  | 1.86792  | 4.67E-06 | 3.17E-05 |
| ZMAT5        | <a href="#">113245019</a> | 3.645539942 | 1.866133 | 2.27E-05 | 0.000131 |
| INSYN1       | <a href="#">113240951</a> | 3.644654032 | 1.865782 | 0.003466 | 0.011343 |
| LRRTM2       | <a href="#">113261797</a> | 3.644102694 | 1.865564 | 0.002992 | 0.009998 |
| DCAF6        | <a href="#">113262875</a> | 3.634561826 | 1.861781 | 0.000659 | 0.002677 |
| CUNH9orf16   | <a href="#">113266457</a> | 3.63428294  | 1.861671 | 3.14E-05 | 0.000175 |
| ZNF391       | <a href="#">113264258</a> | 3.632274446 | 1.860873 | 2.25E-05 | 0.00013  |
| CCDC136      | <a href="#">113263909</a> | 3.631012608 | 1.860372 | 4.25E-05 | 0.00023  |
| ZYG11B       | <a href="#">113254661</a> | 3.626846199 | 1.858716 | 4E-05    | 0.000218 |
| MRPL21       | <a href="#">113243993</a> | 3.615653444 | 1.854256 | 8.04E-06 | 5.18E-05 |
| RAPGEF1      | <a href="#">113266537</a> | 3.614830168 | 1.853928 | 1.72E-05 | 0.000103 |
| FASTK        | <a href="#">113241480</a> | 3.611712036 | 1.852683 | 7.63E-06 | 4.95E-05 |
| NOX4         | <a href="#">113269421</a> | 3.61000922  | 1.852003 | 0.002226 | 0.007732 |
| LOC113247021 | <a href="#">113247021</a> | 3.606306538 | 1.850522 | 0.001393 | 0.005149 |
| YPEL2        | <a href="#">113268888</a> | 3.605804345 | 1.850321 | 2.2E-05  | 0.000128 |
| AVPI1        | <a href="#">113251796</a> | 3.603725364 | 1.849489 | 0.000616 | 0.002525 |

|              |                           |             |          |          |          |
|--------------|---------------------------|-------------|----------|----------|----------|
| PLEKHH3      | <a href="#">113265409</a> | 3.603014788 | 1.849205 | 3.91E-06 | 2.69E-05 |
| EML1         | <a href="#">113267272</a> | 3.601332967 | 1.848531 | 0.000235 | 0.001077 |
| PIH1D1       | <a href="#">113243302</a> | 3.599848866 | 1.847936 | 2.04E-06 | 1.47E-05 |
| CGNL1        | <a href="#">113269670</a> | 3.59961167  | 1.847841 | 2.86E-05 | 0.000162 |
| ANO5         | <a href="#">113265108</a> | 3.598247884 | 1.847295 | 0.006651 | 0.019871 |
| GMPS         | <a href="#">113254098</a> | 3.593739088 | 1.845486 | 0.000134 | 0.000651 |
| SLC7A6OS     | <a href="#">113252408</a> | 3.592077977 | 1.844819 | 1.13E-05 | 7.03E-05 |
| NDUFB5       | <a href="#">113254753</a> | 5.182254423 | 2.37358  | 6.48E-09 | 7.35E-08 |
| NDUFS4       | <a href="#">113263912</a> | 5.180952033 | 2.373217 | 6.79E-08 | 6.49E-07 |
| PDE4B        | <a href="#">113254561</a> | 5.176978039 | 2.37211  | 3.17E-07 | 2.64E-06 |
| ACYP2        | <a href="#">113245706</a> | 5.16460707  | 2.368659 | 1.02E-05 | 6.45E-05 |
| TAGLN        | <a href="#">113260017</a> | 5.162970495 | 2.368201 | 1.82E-07 | 1.6E-06  |
| JAG2         | <a href="#">113267148</a> | 5.154148089 | 2.365734 | 4.1E-09  | 4.82E-08 |
| MRPL33       | <a href="#">113240736</a> | 5.14920264  | 2.364349 | 5.08E-08 | 4.95E-07 |
| KIAA1217     | <a href="#">113241331</a> | 5.142682744 | 2.362521 | 9.76E-10 | 1.31E-08 |
| BZW2         | <a href="#">113261015</a> | 5.142298357 | 2.362413 | 2.76E-07 | 2.33E-06 |
| MAP3K7CL     | <a href="#">113267437</a> | 5.125506677 | 2.357695 | 2.11E-06 | 1.52E-05 |
| FAM83C       | <a href="#">113258536</a> | 5.124313321 | 2.357359 | 1.91E-05 | 0.000112 |
| ACTA2        | <a href="#">113258969</a> | 5.116930042 | 2.355279 | 1.19E-09 | 1.57E-08 |
| RNF225       | <a href="#">113248032</a> | 5.116265534 | 2.355091 | 7.65E-05 | 0.000394 |
| LOC113244568 | <a href="#">113244568</a> | 5.109196029 | 2.353096 | 8.37E-05 | 0.000427 |
| LOC113266806 | <a href="#">113266806</a> | 5.09912202  | 2.350249 | 0.002569 | 0.008747 |
| VDAC3        | <a href="#">113245581</a> | 5.097905706 | 2.349905 | 4.07E-05 | 0.000221 |
| SULF2        | <a href="#">113258690</a> | 5.091898189 | 2.348204 | 1.15E-06 | 8.66E-06 |
| LOC113254515 | <a href="#">113254515</a> | 5.08986265  | 2.347627 | 0.000189 | 0.000887 |
| MAFF         | <a href="#">113241783</a> | 5.088669802 | 2.347289 | 3.79E-08 | 3.77E-07 |
| NDUFA8       | <a href="#">113266369</a> | 5.088070083 | 2.347119 | 1.56E-06 | 1.15E-05 |
| DNASE1L1     | <a href="#">113247843</a> | 5.041284203 | 2.333791 | 7.82E-07 | 6.08E-06 |

|              |                           |             |          |          |          |
|--------------|---------------------------|-------------|----------|----------|----------|
| NHLRC1       | <a href="#">113264504</a> | 5.032565712 | 2.331294 | 1.38E-05 | 8.46E-05 |
| DKK3         | <a href="#">113246270</a> | 5.001037803 | 2.322228 | 0.00013  | 0.000631 |
| IRAK1BP1     | <a href="#">113261094</a> | 4.993969694 | 2.320187 | 2.14E-06 | 1.54E-05 |
| HOXA7        | <a href="#">113262001</a> | 4.990864408 | 2.31929  | 5.66E-07 | 4.51E-06 |
| ARPP19       | <a href="#">113269638</a> | 4.98805239  | 2.318477 | 2.94E-06 | 2.06E-05 |
| LOC113248616 | <a href="#">113248616</a> | 4.982546716 | 2.316883 | 2.11E-08 | 2.18E-07 |
| LOC113252908 | <a href="#">113252908</a> | 4.973140037 | 2.314157 | 1.29E-05 | 7.93E-05 |
| IMMP2L       | <a href="#">113262909</a> | 4.971730147 | 2.313748 | 3.44E-07 | 2.85E-06 |
| SUSD4        | <a href="#">113262898</a> | 4.968029602 | 2.312674 | 0.000622 | 0.002543 |
| PKD2         | <a href="#">113265612</a> | 4.967713081 | 2.312582 | 3.65E-06 | 2.52E-05 |
| ATP5MPL      | <a href="#">113267204</a> | 4.958596821 | 2.309932 | 2.1E-06  | 1.51E-05 |
| ACADS        | <a href="#">113267053</a> | 4.957977519 | 2.309752 | 2.71E-06 | 1.91E-05 |
| LYSMD1       | <a href="#">113246163</a> | 4.952779437 | 2.308238 | 6.55E-08 | 6.27E-07 |
| SDHB         | <a href="#">113270447</a> | 4.950619086 | 2.307609 | 1.91E-06 | 1.38E-05 |
| HIF3A        | <a href="#">113243399</a> | 4.946625659 | 2.306445 | 0.00019  | 0.000888 |
| VDAC1        | <a href="#">113261734</a> | 4.94236777  | 2.305202 | 0.000139 | 0.000671 |
| HOMER3       | <a href="#">113256738</a> | 4.941869015 | 2.305057 | 3.26E-09 | 3.93E-08 |
| IGSF23       | <a href="#">113243462</a> | 4.918616999 | 2.298253 | 4.02E-05 | 0.000219 |
| MFN2         | <a href="#">113270495</a> | 4.918232638 | 2.29814  | 6.26E-06 | 4.14E-05 |
| CUEDC1       | <a href="#">113268859</a> | 4.908684331 | 2.295336 | 7.67E-08 | 7.26E-07 |
| CYR61        | <a href="#">113254464</a> | 4.908344555 | 2.295237 | 1.77E-08 | 1.86E-07 |
| TEX29        | <a href="#">113248531</a> | 4.904636985 | 2.294146 | 8.51E-06 | 5.46E-05 |
| LOC113257882 | <a href="#">113257882</a> | 4.90434679  | 2.294061 | 0.000108 | 0.000539 |
| NDUFA9       | <a href="#">113257995</a> | 4.898221765 | 2.292258 | 1.11E-06 | 8.39E-06 |
| ATP5MC2      | <a href="#">113257544</a> | 4.896569563 | 2.291771 | 2.28E-05 | 0.000132 |
| SLC25A11     | <a href="#">113271067</a> | 4.883670965 | 2.287966 | 1.78E-06 | 1.3E-05  |
| PPP1R3F      | <a href="#">113265953</a> | 4.880940524 | 2.287159 | 1.24E-06 | 9.29E-06 |
| MAGIX        | <a href="#">113265825</a> | 4.876353542 | 2.285803 | 2.25E-07 | 1.93E-06 |

|              |                           |             |          |          |          |
|--------------|---------------------------|-------------|----------|----------|----------|
| KHDRBS3      | <a href="#">113252694</a> | 4.873685864 | 2.285013 | 0.000129 | 0.000629 |
| SYT7         | <a href="#">113246992</a> | 4.870581233 | 2.284094 | 8.28E-07 | 6.41E-06 |
| SLC25A30     | <a href="#">113251350</a> | 4.87050487  | 2.284071 | 1.72E-08 | 1.81E-07 |
| SUCLG1       | <a href="#">113243306</a> | 4.869676356 | 2.283826 | 8.45E-05 | 0.000431 |
| NEU3         | <a href="#">113269322</a> | 4.864477853 | 2.282285 | 8.99E-09 | 9.98E-08 |
| LOC113261568 | <a href="#">113261568</a> | 4.863444805 | 2.281979 | 1.16E-08 | 1.26E-07 |
| TOB1         | <a href="#">113265636</a> | 4.861364096 | 2.281361 | 6.93E-08 | 6.61E-07 |
| SVIL         | <a href="#">113244243</a> | 4.860904544 | 2.281225 | 3.36E-05 | 0.000187 |
| CIPC         | <a href="#">113270299</a> | 4.860780052 | 2.281188 | 3.53E-09 | 4.21E-08 |
| CFAP54       | <a href="#">113256123</a> | 4.850251988 | 2.27806  | 0.000331 | 0.001457 |
| TNFRSF12A    | <a href="#">113245425</a> | 4.846130893 | 2.276833 | 0.000362 | 0.001577 |
| KIAA1755     | <a href="#">113258589</a> | 4.842617008 | 2.275787 | 8.77E-05 | 0.000446 |
| ATP5F1A      | <a href="#">113253374</a> | 4.840685563 | 2.275211 | 0.001838 | 0.006532 |
| TRIM45       | <a href="#">113244373</a> | 4.840650775 | 2.275201 | 2.45E-08 | 2.5E-07  |
| LOC113257633 | <a href="#">113257633</a> | 4.83940976  | 2.274831 | 3.44E-09 | 4.12E-08 |
| TENM1        | <a href="#">113270934</a> | 4.835496757 | 2.273664 | 0.000142 | 0.000685 |
| ZSCAN12      | <a href="#">113248152</a> | 4.815036701 | 2.267547 | 1.75E-07 | 1.54E-06 |
| LOC113244843 | <a href="#">113244843</a> | 4.813134009 | 2.266977 | 6.72E-06 | 4.41E-05 |
| LOC113258460 | <a href="#">113258460</a> | 4.808523112 | 2.265594 | 9.73E-05 | 0.000489 |
| HOXD9        | <a href="#">113250743</a> | 4.807298689 | 2.265226 | 0.0002   | 0.000929 |
| NDUFB11      | <a href="#">113265993</a> | 4.801283092 | 2.26342  | 8.75E-07 | 6.74E-06 |
| LOC113249623 | <a href="#">113249623</a> | 4.791451023 | 2.260463 | 0.012365 | 0.03346  |
| ITIH3        | <a href="#">113256968</a> | 4.786123389 | 2.258858 | 0.000112 | 0.000555 |
| PPP3CB       | <a href="#">113259177</a> | 4.78374038  | 2.258139 | 4.94E-07 | 3.98E-06 |
| INHBB        | <a href="#">113263463</a> | 4.775124396 | 2.255538 | 6.33E-05 | 0.000332 |
| LOC113251521 | <a href="#">113251521</a> | 4.766539513 | 2.252942 | 0.002711 | 0.009173 |
| FMC1         | <a href="#">113264958</a> | 4.754493474 | 2.249292 | 2.01E-09 | 2.54E-08 |
| CISD1        | <a href="#">113259063</a> | 4.752934296 | 2.248818 | 1.33E-06 | 9.91E-06 |

|              |                           |             |          |          |          |
|--------------|---------------------------|-------------|----------|----------|----------|
| COMP         | <a href="#">113256730</a> | 4.744476845 | 2.246249 | 0.009866 | 0.027616 |
| CLCN4        | <a href="#">113240744</a> | 4.73774328  | 2.2442   | 3E-07    | 2.51E-06 |
| CHST10       | <a href="#">113247050</a> | 4.734594766 | 2.243241 | 5.93E-09 | 6.77E-08 |
| CCDC28B      | <a href="#">113268366</a> | 4.726893461 | 2.240892 | 7.64E-06 | 4.96E-05 |
| EFCC1        | <a href="#">113257241</a> | 4.726197745 | 2.24068  | 3.25E-05 | 0.000181 |
| TGFB2        | <a href="#">113268733</a> | 4.711644914 | 2.236231 | 1.79E-08 | 1.88E-07 |
| LOC113246281 | <a href="#">113246281</a> | 4.706216007 | 2.234568 | 0.000409 | 0.001754 |
| SLC14A2      | <a href="#">113253366</a> | 4.698756455 | 2.232279 | 0.000488 | 0.002054 |
| ABLIM1       | <a href="#">113251961</a> | 4.697014479 | 2.231744 | 2.1E-05  | 0.000122 |
| NFIC         | <a href="#">113242797</a> | 4.687890322 | 2.228939 | 9.2E-07  | 7.06E-06 |
| LOC113247619 | <a href="#">113247619</a> | 4.685299412 | 2.228141 | 2.21E-05 | 0.000128 |
| ADSL         | <a href="#">113241749</a> | 4.682097268 | 2.227155 | 8.61E-08 | 8.04E-07 |
| KCNJ12       | <a href="#">113271319</a> | 4.675115531 | 2.225002 | 1.92E-05 | 0.000113 |
| CUTC         | <a href="#">113251818</a> | 4.665234126 | 2.221949 | 9.21E-09 | 1.02E-07 |
| COL11A2      | <a href="#">113243790</a> | 4.660151595 | 2.220377 | 3.6E-05  | 0.000199 |
| FAM124B      | <a href="#">113250394</a> | 4.659211798 | 2.220086 | 0.000186 | 0.000874 |
| SGIP1        | <a href="#">113254558</a> | 4.646785809 | 2.216233 | 0.000167 | 0.000793 |
| CES1         | <a href="#">113252254</a> | 4.64672847  | 2.216215 | 4.11E-06 | 2.82E-05 |
| LOC113256842 | <a href="#">113256842</a> | 4.63743519  | 2.213327 | 6.71E-05 | 0.00035  |
| LOC113248649 | <a href="#">113248649</a> | 4.631006825 | 2.211326 | 7.68E-09 | 8.58E-08 |
| ZNF358       | <a href="#">113242937</a> | 4.63042649  | 2.211145 | 5.52E-06 | 3.69E-05 |
| LOC113242741 | <a href="#">113242741</a> | 4.627428619 | 2.210211 | 1.55E-06 | 1.14E-05 |
| MPI          | <a href="#">113240979</a> | 4.622105896 | 2.20855  | 3.32E-09 | 3.99E-08 |
| PLEKHB1      | <a href="#">113269294</a> | 4.617135661 | 2.206998 | 2.75E-05 | 0.000156 |
| TRIP10       | <a href="#">113242888</a> | 4.611715448 | 2.205303 | 4.22E-05 | 0.000229 |
| NDUFV2       | <a href="#">113253220</a> | 4.610394365 | 2.20489  | 1.13E-06 | 8.51E-06 |
| MRPS5        | <a href="#">113242194</a> | 4.607810707 | 2.204081 | 2.51E-07 | 2.13E-06 |
| ATP5F1C      | <a href="#">113241155</a> | 4.606158927 | 2.203564 | 0.000134 | 0.000653 |

|              |                           |             |          |          |          |
|--------------|---------------------------|-------------|----------|----------|----------|
| CNGB1        | <a href="#">113252297</a> | 4.605728598 | 2.203429 | 0.000224 | 0.00103  |
| KLHL21       | <a href="#">113270566</a> | 4.601924045 | 2.202237 | 2.21E-08 | 2.28E-07 |
| CASKIN1      | <a href="#">113245186</a> | 4.59980393  | 2.201572 | 4.62E-05 | 0.000249 |
| DDAH1        | <a href="#">113254466</a> | 4.593277413 | 2.199524 | 3.94E-06 | 2.71E-05 |
| CCDC141      | <a href="#">113250711</a> | 4.581733451 | 2.195894 | 1.16E-05 | 7.21E-05 |
| CUNH11orf71  | <a href="#">113260034</a> | 4.578405716 | 2.194845 | 0.000129 | 0.000628 |
| MAP7D1       | <a href="#">113268291</a> | 4.570537539 | 2.192364 | 8.82E-06 | 5.64E-05 |
| PANK4        | <a href="#">113270600</a> | 4.566698907 | 2.191152 | 5.44E-09 | 6.25E-08 |
| NR1D2        | <a href="#">113253869</a> | 4.562547466 | 2.18984  | 2.05E-05 | 0.00012  |
| RHOBTB1      | <a href="#">113259077</a> | 4.561696656 | 2.189571 | 3.58E-07 | 2.96E-06 |
| RERGL        | <a href="#">113257835</a> | 4.557411057 | 2.188215 | 0.000253 | 0.001147 |
| LOC113245319 | <a href="#">113245319</a> | 4.557249157 | 2.188163 | 0.002256 | 0.007816 |
| MYPOP        | <a href="#">113243407</a> | 4.551043222 | 2.186197 | 1.9E-06  | 1.38E-05 |
| SYN1         | <a href="#">113265974</a> | 4.545954548 | 2.184583 | 5.48E-05 | 0.000291 |
| MAPRE3       | <a href="#">113270924</a> | 4.535290107 | 2.181195 | 5.97E-05 | 0.000315 |
| ATP5PB       | <a href="#">113244431</a> | 4.535215669 | 2.181171 | 0.000435 | 0.00185  |
| MRPS24       | <a href="#">113257987</a> | 4.530834622 | 2.179777 | 5.94E-08 | 5.71E-07 |
| ATP5PD       | <a href="#">113244651</a> | 4.530074077 | 2.179535 | 0.000312 | 0.001383 |
| HSF4         | <a href="#">113252349</a> | 4.521528408 | 2.176811 | 0.000108 | 0.000536 |
| PAM16        | <a href="#">113270852</a> | 4.517055085 | 2.175383 | 4.24E-08 | 4.2E-07  |
| CLIP1        | <a href="#">113266923</a> | 4.516352661 | 2.175158 | 7.4E-06  | 4.82E-05 |
| RASSF8       | <a href="#">113257786</a> | 4.512926943 | 2.174063 | 1.95E-07 | 1.7E-06  |
| LOC113264441 | <a href="#">113264441</a> | 4.504072863 | 2.17123  | 5.39E-05 | 0.000286 |
| VSIG10L      | <a href="#">113247243</a> | 4.500321071 | 2.170028 | 8.84E-05 | 0.000449 |
| ATP5F1B      | <a href="#">113256410</a> | 4.498354309 | 2.169397 | 0.003664 | 0.011886 |
| THBS2        | <a href="#">113247125</a> | 4.494986643 | 2.168317 | 0.006076 | 0.018431 |
| SLC2A4RG     | <a href="#">113258822</a> | 4.49131406  | 2.167138 | 7.06E-06 | 4.61E-05 |
| PYURF        | <a href="#">113263153</a> | 4.489861547 | 2.166671 | 1.31E-07 | 1.18E-06 |

|          |                           |             |          |          |          |
|----------|---------------------------|-------------|----------|----------|----------|
| NDUFB8   | <a href="#">113251835</a> | 4.489064163 | 2.166415 | 3.95E-06 | 2.72E-05 |
| IMPDH2   | <a href="#">113256856</a> | 4.48469474  | 2.16501  | 0.000203 | 0.000942 |
| SMIM26   | <a href="#">113258309</a> | 4.478474566 | 2.163007 | 9.85E-07 | 7.52E-06 |
| ZNF579   | <a href="#">113247353</a> | 4.477947008 | 2.162837 | 2.4E-08  | 2.46E-07 |
| LEAP2    | <a href="#">113261728</a> | 4.476806722 | 2.16247  | 0.000265 | 0.001195 |
| TSLP     | <a href="#">113254959</a> | 4.475269942 | 2.161975 | 0.000423 | 0.001808 |
| KREMEN1  | <a href="#">113245007</a> | 4.462405626 | 2.157822 | 1.69E-05 | 0.000101 |
| SLC6A8   | <a href="#">113247834</a> | 4.46073902  | 2.157283 | 1.89E-07 | 1.65E-06 |
| MPPED2   | <a href="#">113265079</a> | 4.455032552 | 2.155436 | 0.00019  | 0.000888 |
| NFATC1   | <a href="#">113253544</a> | 4.454581846 | 2.15529  | 4.64E-08 | 4.55E-07 |
| SERHL2   | <a href="#">113241696</a> | 4.454385124 | 2.155226 | 6.27E-05 | 0.00033  |
| KCNMB2   | <a href="#">113254860</a> | 4.449935514 | 2.153784 | 0.000377 | 0.001633 |
| SMIM12   | <a href="#">113268319</a> | 4.448409515 | 2.15329  | 1.17E-07 | 1.06E-06 |
| DPH3     | <a href="#">113253905</a> | 4.444907507 | 2.152153 | 2.72E-07 | 2.3E-06  |
| ATP8B3   | <a href="#">113242657</a> | 4.436335544 | 2.149368 | 0.000921 | 0.00358  |
| DHDH     | <a href="#">113243321</a> | 4.436195559 | 2.149323 | 0.001094 | 0.004163 |
| DNAJB6   | <a href="#">113241530</a> | 4.434751064 | 2.148853 | 7.28E-08 | 6.92E-07 |
| NDUFC2   | <a href="#">113269364</a> | 4.428130344 | 2.146698 | 8.04E-07 | 6.24E-06 |
| FMO2     | <a href="#">113262845</a> | 4.42664973  | 2.146215 | 2.12E-06 | 1.52E-05 |
| RAB12    | <a href="#">113253223</a> | 4.425734367 | 2.145917 | 1.39E-07 | 1.25E-06 |
| OPTN     | <a href="#">113241074</a> | 4.425208502 | 2.145745 | 1.15E-05 | 7.17E-05 |
| ABCA5    | <a href="#">113265229</a> | 4.420612284 | 2.144246 | 6.71E-08 | 6.41E-07 |
| HMCN1    | <a href="#">113262754</a> | 4.416665253 | 2.142957 | 3.74E-05 | 0.000206 |
| GTF3A    | <a href="#">113251205</a> | 4.412226894 | 2.141507 | 5.24E-08 | 5.1E-07  |
| JUN      | <a href="#">113254611</a> | 4.397946738 | 2.13683  | 1.88E-06 | 1.36E-05 |
| SLC16A10 | <a href="#">113264727</a> | 4.392778297 | 2.135134 | 4.82E-06 | 3.27E-05 |
| NMS      | <a href="#">113247084</a> | 4.39199225  | 2.134876 | 0.000262 | 0.001184 |
| BTC      | <a href="#">113263271</a> | 4.376733562 | 2.129855 | 0.000453 | 0.001918 |

|              |                           |             |          |          |          |
|--------------|---------------------------|-------------|----------|----------|----------|
| SLC20A2      | <a href="#">113245534</a> | 4.376228241 | 2.129688 | 1.02E-05 | 6.42E-05 |
| PIGY         | <a href="#">113263154</a> | 4.375063498 | 2.129304 | 5.61E-07 | 4.48E-06 |
| KCNJ2        | <a href="#">113265224</a> | 4.356441672 | 2.12315  | 0.000404 | 0.001739 |
| RASGRF2      | <a href="#">113255154</a> | 4.356300926 | 2.123104 | 6.31E-07 | 4.99E-06 |
| CDC34        | <a href="#">113242694</a> | 4.355551984 | 2.122856 | 1.63E-05 | 9.78E-05 |
| ZNF32        | <a href="#">113243142</a> | 4.34553578  | 2.119534 | 1.53E-06 | 1.13E-05 |
| TRMT12       | <a href="#">113252745</a> | 4.342817029 | 2.118631 | 5.25E-07 | 4.21E-06 |
| ZNF30        | <a href="#">113244783</a> | 4.342500574 | 2.118526 | 9.2E-06  | 5.86E-05 |
| EGLN1        | <a href="#">113259033</a> | 4.342314107 | 2.118464 | 7.61E-08 | 7.21E-07 |
| PARD6A       | <a href="#">113252374</a> | 4.33358364  | 2.115561 | 0.000371 | 0.001613 |
| TBC1D4       | <a href="#">113251422</a> | 4.329015358 | 2.114039 | 1.11E-07 | 1.01E-06 |
| TMEM108      | <a href="#">113253944</a> | 4.325687774 | 2.11293  | 5.28E-05 | 0.000282 |
| LACTB2       | <a href="#">113253065</a> | 4.321230847 | 2.111442 | 1.89E-07 | 1.65E-06 |
| NDUFB6       | <a href="#">113260540</a> | 4.314698538 | 2.10926  | 1.49E-06 | 1.1E-05  |
| ALKBH3       | <a href="#">113265015</a> | 4.314252031 | 2.10911  | 1.54E-08 | 1.64E-07 |
| CHRM4        | <a href="#">113264986</a> | 4.311736002 | 2.108269 | 0.00064  | 0.002609 |
| MANEAL       | <a href="#">113268270</a> | 4.307699492 | 2.106918 | 0.000112 | 0.000557 |
| MEF2D        | <a href="#">113245229</a> | 4.307003588 | 2.106685 | 5.42E-08 | 5.26E-07 |
| SFXN4        | <a href="#">113251991</a> | 4.306582053 | 2.106543 | 1.07E-07 | 9.78E-07 |
| LIMCH1       | <a href="#">113262439</a> | 4.304482081 | 2.10584  | 1.42E-05 | 8.63E-05 |
| BBS5         | <a href="#">113250801</a> | 4.302286775 | 2.105104 | 0.000195 | 0.000912 |
| ZDHHC1       | <a href="#">113252362</a> | 4.30146684  | 2.104829 | 1.42E-05 | 8.63E-05 |
| PROCA1       | <a href="#">113269040</a> | 4.296028313 | 2.103004 | 1.44E-06 | 1.07E-05 |
| MRPL12       | <a href="#">113244509</a> | 4.295070502 | 2.102682 | 2.59E-07 | 2.19E-06 |
| EVA1C        | <a href="#">113265647</a> | 4.290495384 | 2.101144 | 8.16E-05 | 0.000418 |
| LOC113241107 | <a href="#">113241107</a> | 4.285042243 | 2.099309 | 2.61E-05 | 0.000149 |
| ECPAS        | <a href="#">113260320</a> | 4.282533375 | 2.098464 | 0.000118 | 0.000583 |
| DST          | <a href="#">113261161</a> | 4.280889485 | 2.097911 | 3.36E-05 | 0.000187 |

|         |                           |             |          |          |          |
|---------|---------------------------|-------------|----------|----------|----------|
| EPHA4   | <a href="#">113250413</a> | 4.278272915 | 2.097029 | 0.000117 | 0.000579 |
| WNT10B  | <a href="#">113257662</a> | 4.270749728 | 2.094489 | 0.000307 | 0.001367 |
| APOO    | <a href="#">113242225</a> | 4.270280369 | 2.094331 | 1.18E-06 | 8.89E-06 |
| RASSF9  | <a href="#">113256205</a> | 4.26931494  | 2.094005 | 0.000526 | 0.002195 |
| TARSL2  | <a href="#">113263620</a> | 4.267616578 | 2.093431 | 4.15E-07 | 3.4E-06  |
| NDUFA6  | <a href="#">113241708</a> | 4.266184849 | 2.092946 | 1.75E-07 | 1.54E-06 |
| ZBTB16  | <a href="#">113260036</a> | 4.24982606  | 2.087404 | 1.04E-06 | 7.94E-06 |
| WNT4    | <a href="#">113268542</a> | 4.248253429 | 2.08687  | 0.000584 | 0.00241  |
| PLEKHM2 | <a href="#">113270664</a> | 4.245444324 | 2.085916 | 0.000313 | 0.001389 |
| NR4A2   | <a href="#">113250870</a> | 4.242651123 | 2.084966 | 0.000452 | 0.001916 |
| FHL5    | <a href="#">113264813</a> | 4.239836849 | 2.084009 | 0.000607 | 0.002489 |
| PGPEP1  | <a href="#">113256715</a> | 4.234070833 | 2.082045 | 9.51E-08 | 8.78E-07 |
| PHKB    | <a href="#">113252209</a> | 4.23405246  | 2.082039 | 1.97E-06 | 1.42E-05 |
| MLLT11  | <a href="#">113246131</a> | 4.22653532  | 2.079476 | 4.41E-08 | 4.36E-07 |
| R3HDM2  | <a href="#">113256386</a> | 4.222824325 | 2.078208 | 4.6E-05  | 0.000248 |
| KPNA4   | <a href="#">113254139</a> | 4.22064132  | 2.077462 | 1.94E-05 | 0.000114 |
| GPR17   | <a href="#">113263488</a> | 4.220098925 | 2.077277 | 0.000415 | 0.001778 |
| FGF1    | <a href="#">113255360</a> | 4.218316536 | 2.076667 | 3.56E-05 | 0.000197 |
| PDE8A   | <a href="#">113263738</a> | 4.218252776 | 2.076646 | 6.17E-07 | 4.89E-06 |
| WWP1    | <a href="#">113252973</a> | 4.217108757 | 2.076254 | 1.89E-05 | 0.000112 |
| KIF13A  | <a href="#">113264500</a> | 4.216663332 | 2.076102 | 3.55E-06 | 2.46E-05 |
| UBL4A   | <a href="#">113247812</a> | 4.216429425 | 2.076022 | 3.99E-07 | 3.27E-06 |
| PRRX1   | <a href="#">113262848</a> | 4.209858507 | 2.073772 | 3.37E-05 | 0.000187 |
| KLHL24  | <a href="#">113254479</a> | 4.208477995 | 2.073299 | 2.56E-07 | 2.17E-06 |
| ZFP37   | <a href="#">113266304</a> | 4.203456897 | 2.071576 | 7.66E-05 | 0.000394 |
| MMACHC  | <a href="#">113254743</a> | 4.201090669 | 2.070764 | 1.09E-05 | 6.87E-05 |
| ITGB4   | <a href="#">113244620</a> | 4.193272817 | 2.068077 | 8.74E-06 | 5.6E-05  |
| KLHL4   | <a href="#">113242173</a> | 4.186142972 | 2.065622 | 0.000222 | 0.001026 |

|              |                           |             |          |          |          |
|--------------|---------------------------|-------------|----------|----------|----------|
| ATP5F1D      | <a href="#">113242724</a> | 4.181534895 | 2.064033 | 0.000108 | 0.000536 |
| UBR3         | <a href="#">113250793</a> | 4.176652239 | 2.062347 | 1.19E-05 | 7.41E-05 |
| SEPT11       | <a href="#">113263245</a> | 4.174966201 | 2.061765 | 1.72E-07 | 1.52E-06 |
| LOC113271232 | <a href="#">113271232</a> | 4.167411137 | 2.059151 | 0.000237 | 0.001084 |
| MUL1         | <a href="#">113268565</a> | 4.166976009 | 2.059001 | 2.21E-07 | 1.9E-06  |
| HOXC8        | <a href="#">113257531</a> | 4.165178301 | 2.058378 | 0.014055 | 0.037336 |
| CARNMT1      | <a href="#">113269844</a> | 4.164692229 | 2.05821  | 2.07E-07 | 1.79E-06 |
| LOC113255247 | <a href="#">113255247</a> | 4.16329449  | 2.057726 | 1.84E-05 | 0.000109 |
| TEX2         | <a href="#">113265274</a> | 4.162424807 | 2.057424 | 5.9E-06  | 3.92E-05 |
| AMN1         | <a href="#">113257748</a> | 4.162101096 | 2.057312 | 7.24E-07 | 5.67E-06 |
| NFE2L1       | <a href="#">113265569</a> | 4.161381194 | 2.057062 | 4.84E-05 | 0.00026  |
| LOC113267950 | <a href="#">113267950</a> | 4.159962606 | 2.056571 | 8.16E-05 | 0.000418 |
| KRTCAP3      | <a href="#">113271234</a> | 4.159795322 | 2.056513 | 8.86E-05 | 0.000449 |
| PFN2         | <a href="#">113254055</a> | 4.157565657 | 2.055739 | 5.87E-05 | 0.00031  |
| TMEM136      | <a href="#">113259949</a> | 4.155904664 | 2.055163 | 4.45E-06 | 3.03E-05 |
| RELN         | <a href="#">113258887</a> | 4.151154847 | 2.053513 | 5.59E-05 | 0.000296 |
| FBXL22       | <a href="#">113240838</a> | 4.150241397 | 2.053195 | 0.000116 | 0.000573 |
| TOMM20       | <a href="#">113259006</a> | 4.139755496 | 2.049546 | 1.45E-05 | 8.81E-05 |
| TLN2         | <a href="#">113269702</a> | 4.138270747 | 2.049028 | 9.14E-06 | 5.82E-05 |
| PNPLA4       | <a href="#">113240758</a> | 4.136742947 | 2.048495 | 6.59E-06 | 4.33E-05 |
| CLIC5        | <a href="#">113261239</a> | 4.135311168 | 2.047996 | 1.68E-05 | 0.0001   |
| RRAGB        | <a href="#">113247969</a> | 4.13393493  | 2.047516 | 3.66E-07 | 3.02E-06 |
| FAM180B      | <a href="#">113264952</a> | 4.13102556  | 2.0465   | 0.002374 | 0.008163 |
| ANKRD9       | <a href="#">113267237</a> | 4.130931855 | 2.046467 | 3.66E-07 | 3.01E-06 |
| NDUFB7       | <a href="#">113247157</a> | 4.129473203 | 2.045958 | 1.6E-07  | 1.42E-06 |
| HSCB         | <a href="#">113245003</a> | 4.129402962 | 2.045933 | 4.48E-07 | 3.64E-06 |
| PABPC4       | <a href="#">113268249</a> | 4.127203821 | 2.045165 | 0.000167 | 0.000795 |
| ATP6V1G2     | <a href="#">113243710</a> | 4.126183016 | 2.044808 | 0.000181 | 0.000857 |

|              |                           |             |          |          |          |
|--------------|---------------------------|-------------|----------|----------|----------|
| FUNDC2       | <a href="#">113248346</a> | 4.12503991  | 2.044408 | 5.79E-07 | 4.6E-06  |
| TMEM161A     | <a href="#">113256742</a> | 4.122038757 | 2.043358 | 1.39E-07 | 1.25E-06 |
| RBFOX2       | <a href="#">113255999</a> | 4.12072284  | 2.042897 | 1.52E-05 | 9.17E-05 |
| SPATA24      | <a href="#">113261807</a> | 4.118593142 | 2.042152 | 0.000184 | 0.000868 |
| UBALD1       | <a href="#">113270843</a> | 4.111761441 | 2.039757 | 1.07E-07 | 9.81E-07 |
| COL4A4       | <a href="#">113250384</a> | 4.107943586 | 2.038416 | 0.001005 | 0.00387  |
| ATP5ME       | <a href="#">113245737</a> | 4.098735652 | 2.035179 | 4.14E-05 | 0.000225 |
| AGL          | <a href="#">113254363</a> | 4.097772001 | 2.03484  | 9.53E-05 | 0.00048  |
| NDUFS2       | <a href="#">113246718</a> | 4.095137646 | 2.033912 | 0.000278 | 0.001247 |
| SMIM1        | <a href="#">113270590</a> | 4.08809008  | 2.031427 | 1.98E-07 | 1.72E-06 |
| LOC113248801 | <a href="#">113248801</a> | 4.087076884 | 2.031069 | 0.000958 | 0.003708 |
| FAM131A      | <a href="#">113254262</a> | 4.086332039 | 2.030806 | 7.7E-07  | 5.99E-06 |
| RGS5         | <a href="#">113268681</a> | 4.07691845  | 2.027479 | 3.76E-05 | 0.000207 |
| CAMSAP1      | <a href="#">113266592</a> | 4.075745948 | 2.027064 | 8.14E-08 | 7.65E-07 |
| TMCC3        | <a href="#">113256152</a> | 4.074911414 | 2.026769 | 3.74E-05 | 0.000206 |
| NDUFS1       | <a href="#">113250544</a> | 4.066890228 | 2.023926 | 0.000103 | 0.000516 |
| PER2         | <a href="#">113249994</a> | 4.058257955 | 2.020861 | 3.27E-06 | 2.27E-05 |
| RDH14        | <a href="#">113270195</a> | 4.053619162 | 2.019211 | 1.92E-06 | 1.39E-05 |
| EGR1         | <a href="#">113261792</a> | 4.051715409 | 2.018533 | 6.34E-06 | 4.18E-05 |
| ASB8         | <a href="#">113257679</a> | 4.049849317 | 2.017868 | 3.98E-07 | 3.27E-06 |
| CUL5         | <a href="#">113260213</a> | 4.049377129 | 2.0177   | 8.47E-08 | 7.92E-07 |
| HIVEP2       | <a href="#">113259505</a> | 4.046843153 | 2.016797 | 1.62E-08 | 1.72E-07 |
| NDUFB4       | <a href="#">113252045</a> | 4.043033156 | 2.015438 | 1.81E-06 | 1.32E-05 |
| LOC113262535 | <a href="#">113262535</a> | 4.037970685 | 2.01363  | 5.29E-06 | 3.55E-05 |
| MFF          | <a href="#">113250383</a> | 4.036782188 | 2.013206 | 1.26E-05 | 7.77E-05 |
| AKAP1        | <a href="#">113268847</a> | 4.033968049 | 2.0122   | 1.39E-06 | 1.03E-05 |
| LOC113249853 | <a href="#">113249853</a> | 4.020081521 | 2.007225 | 0.001319 | 0.004908 |
| TSPAN15      | <a href="#">113258877</a> | 4.019772276 | 2.007114 | 0.000661 | 0.002682 |

|              |                           |             |          |          |          |
|--------------|---------------------------|-------------|----------|----------|----------|
| UBXN6        | <a href="#">113242833</a> | 4.01906     | 2.006858 | 5.3E-05  | 0.000282 |
| DNAJC19      | <a href="#">113254646</a> | 4.012187675 | 2.004389 | 2.02E-06 | 1.45E-05 |
| NREP         | <a href="#">113254998</a> | 4.002028071 | 2.000731 | 9.66E-06 | 6.12E-05 |
| CCDC43       | <a href="#">113265348</a> | 3.99904936  | 1.999657 | 2.42E-07 | 2.07E-06 |
| GPR21        | <a href="#">113266387</a> | 3.998009682 | 1.999282 | 0.000501 | 0.002103 |
| FBXO31       | <a href="#">113252169</a> | 3.997940902 | 1.999257 | 2.87E-05 | 0.000162 |
| TTC33        | <a href="#">113260928</a> | 3.997247036 | 1.999007 | 9.87E-07 | 7.53E-06 |
| CAMK2G       | <a href="#">113259192</a> | 3.996334056 | 1.998677 | 3.96E-05 | 0.000216 |
| DMD          | <a href="#">113265965</a> | 3.993562762 | 1.997676 | 5.4E-05  | 0.000287 |
| ZNF770       | <a href="#">113242069</a> | 3.993032363 | 1.997485 | 3.71E-07 | 3.05E-06 |
| HMGN3        | <a href="#">113261087</a> | 3.992598334 | 1.997328 | 4.32E-07 | 3.53E-06 |
| LOC113247902 | <a href="#">113247902</a> | 3.989548809 | 1.996226 | 0.000607 | 0.002491 |
| CHRNA1       | <a href="#">113250753</a> | 3.988745087 | 1.995935 | 0.000228 | 0.001045 |
| COQ7         | <a href="#">113270738</a> | 3.988084658 | 1.995696 | 3.95E-06 | 2.72E-05 |
| SLC25A20     | <a href="#">113256849</a> | 3.987713349 | 1.995562 | 1.35E-05 | 8.27E-05 |
| LZTS3        | <a href="#">113258399</a> | 3.985565032 | 1.994784 | 8.66E-05 | 0.000441 |
| IDH3B        | <a href="#">113258411</a> | 3.982968404 | 1.993844 | 5.09E-05 | 0.000273 |
| TWF2         | <a href="#">113256944</a> | 3.975715508 | 1.991215 | 7E-05    | 0.000364 |
| IGDCC4       | <a href="#">113241013</a> | 3.97353948  | 1.990425 | 2.47E-07 | 2.11E-06 |
| PDLIM7       | <a href="#">113264157</a> | 3.970432078 | 1.989296 | 6.55E-07 | 5.17E-06 |
| NDUFAF5      | <a href="#">113258328</a> | 3.96883445  | 1.988715 | 2.75E-05 | 0.000156 |
| HOXC9        | <a href="#">113257530</a> | 3.956446757 | 1.984205 | 0.002072 | 0.007251 |
| LOC113246178 | <a href="#">113246178</a> | 3.952464885 | 1.982753 | 1.64E-07 | 1.46E-06 |
| ISYNA1       | <a href="#">113256718</a> | 3.950539913 | 1.98205  | 7.59E-05 | 0.000391 |
| LOC113254727 | <a href="#">113254727</a> | 3.950483699 | 1.982029 | 0.000105 | 0.000525 |
| ATF3         | <a href="#">113262677</a> | 3.950300408 | 1.981962 | 3.97E-05 | 0.000217 |
| LOC113243815 | <a href="#">113243815</a> | 3.946587306 | 1.980606 | 2.02E-06 | 1.46E-05 |
| HADHB        | <a href="#">113270781</a> | 3.942160329 | 1.978986 | 0.000617 | 0.002527 |

|              |                           |             |          |          |          |
|--------------|---------------------------|-------------|----------|----------|----------|
| EIF4EBP1     | <a href="#">113262099</a> | 3.941308331 | 1.978675 | 5.23E-06 | 3.51E-05 |
| DEPTOR       | <a href="#">113252772</a> | 3.939841863 | 1.978138 | 5.72E-06 | 3.81E-05 |
| LOC113248580 | <a href="#">113248580</a> | 3.930596699 | 1.974748 | 1.38E-05 | 8.43E-05 |
| ZNF503       | <a href="#">113259209</a> | 3.928341924 | 1.973921 | 5.47E-07 | 4.37E-06 |
| KIF26A       | <a href="#">113267199</a> | 3.927020843 | 1.973435 | 1.74E-05 | 0.000104 |
| LOC113246863 | <a href="#">113246863</a> | 3.926702902 | 1.973318 | 0.001765 | 0.006308 |
| TRMT2B       | <a href="#">113244297</a> | 3.924733079 | 1.972595 | 0.000265 | 0.001197 |
| PFDN1        | <a href="#">113261816</a> | 3.922935319 | 1.971934 | 3.73E-07 | 3.07E-06 |
| COQ5         | <a href="#">113267040</a> | 3.921745646 | 1.971496 | 7.52E-07 | 5.86E-06 |
| TTC19        | <a href="#">113271258</a> | 3.915333658 | 1.969135 | 3.47E-07 | 2.88E-06 |
| ZSCAN9       | <a href="#">113248163</a> | 3.911955053 | 1.96789  | 0.000313 | 0.001388 |
| RASSF4       | <a href="#">113243126</a> | 3.906260256 | 1.965788 | 4.1E-06  | 2.81E-05 |
| NDUFB2       | <a href="#">113265140</a> | 3.903614752 | 1.964811 | 7.65E-06 | 4.96E-05 |
| LOC113259016 | <a href="#">113259016</a> | 3.900719432 | 1.96374  | 6.57E-06 | 4.32E-05 |
| INPP5E       | <a href="#">113248636</a> | 3.897670056 | 1.962612 | 4.61E-05 | 0.000248 |
| LOC113267907 | <a href="#">113267907</a> | 3.896845459 | 1.962307 | 0.000295 | 0.001318 |
| LOC113247923 | <a href="#">113247923</a> | 3.894579431 | 1.961468 | 0.000349 | 0.001527 |
| BLCAP        | <a href="#">113258579</a> | 3.894471648 | 1.961428 | 0.000213 | 0.000988 |
| DMAC1        | <a href="#">113260618</a> | 3.885760421 | 1.958197 | 5E-07    | 4.02E-06 |
| LOC113246288 | <a href="#">113246288</a> | 3.879045538 | 1.955702 | 0.001244 | 0.004663 |
| ADAMTS1      | <a href="#">113269052</a> | 3.876470993 | 1.954744 | 5.07E-06 | 3.42E-05 |
| NFKBIL1      | <a href="#">113243709</a> | 3.872627078 | 1.953313 | 9.84E-07 | 7.52E-06 |
| CRY2         | <a href="#">113264999</a> | 3.867975785 | 1.951579 | 6.19E-06 | 4.1E-05  |
| SOX7         | <a href="#">113269935</a> | 3.85541899  | 1.946888 | 0.000346 | 0.001515 |
| ADGRA3       | <a href="#">113266735</a> | 3.853370354 | 1.946121 | 1.29E-06 | 9.64E-06 |
| ADRA2C       | <a href="#">113245678</a> | 3.850523892 | 1.945055 | 0.00389  | 0.012499 |
| TCHH         | <a href="#">113246136</a> | 3.849282321 | 1.944589 | 0.007877 | 0.022912 |
| ACCSL        | <a href="#">113265013</a> | 3.845553963 | 1.943191 | 0.000644 | 0.002623 |

|              |                           |             |          |          |          |
|--------------|---------------------------|-------------|----------|----------|----------|
| CACNA1D      | <a href="#">113256986</a> | 3.844295277 | 1.942719 | 0.00033  | 0.001453 |
| FMO1         | <a href="#">113262844</a> | 3.843777181 | 1.942525 | 0.002975 | 0.009955 |
| LOC113261786 | <a href="#">113261786</a> | 3.83742467  | 1.940138 | 0.000541 | 0.002248 |
| UBE2G1       | <a href="#">113271043</a> | 3.836993523 | 1.939976 | 0.000127 | 0.000618 |
| SLC16A11     | <a href="#">113271101</a> | 3.833046882 | 1.938492 | 0.000871 | 0.003415 |
| BLOC1S1      | <a href="#">113256461</a> | 3.830454079 | 1.937515 | 3.78E-05 | 0.000208 |
| RHOBTB3      | <a href="#">113255075</a> | 3.829117057 | 1.937012 | 2.74E-05 | 0.000156 |
| FILIP1L      | <a href="#">113250483</a> | 3.826354623 | 1.935971 | 5.56E-07 | 4.44E-06 |
| NIM1K        | <a href="#">113260953</a> | 3.825634634 | 1.935699 | 0.00321  | 0.010609 |
| TMEM252      | <a href="#">113270191</a> | 3.824024607 | 1.935092 | 0.003358 | 0.011027 |
| MIB1         | <a href="#">113253275</a> | 3.823556501 | 1.934915 | 1.43E-05 | 8.7E-05  |
| ZNF185       | <a href="#">113246825</a> | 3.821878687 | 1.934282 | 0.006224 | 0.018816 |
| SDHD         | <a href="#">113260049</a> | 3.818504196 | 1.933008 | 0.000135 | 0.000653 |
| TRAK1        | <a href="#">113253818</a> | 3.814270762 | 1.931407 | 2.07E-05 | 0.000121 |
| CSDE1        | <a href="#">113244393</a> | 3.812466253 | 1.930725 | 0.007437 | 0.021806 |
| NUDT8        | <a href="#">113244016</a> | 3.810721889 | 1.930064 | 0.000197 | 0.000917 |
| RPP40        | <a href="#">113264415</a> | 3.809678004 | 1.929669 | 8.55E-05 | 0.000436 |
| RNF128       | <a href="#">113241221</a> | 3.809557321 | 1.929623 | 0.010747 | 0.029637 |
| TMEM185A     | <a href="#">113241899</a> | 3.808124663 | 1.929081 | 1.26E-07 | 1.14E-06 |
| NDUFV1       | <a href="#">113244014</a> | 3.805938183 | 1.928252 | 9.2E-05  | 0.000464 |
| CST6         | <a href="#">113244082</a> | 3.805647596 | 1.928142 | 0.000113 | 0.000562 |
| MRPL45       | <a href="#">113265550</a> | 3.804602253 | 1.927746 | 1.05E-05 | 6.61E-05 |
| NT5C3A       | <a href="#">113262512</a> | 3.804600039 | 1.927745 | 9.17E-06 | 5.84E-05 |
| MYOC         | <a href="#">113262839</a> | 3.803393309 | 1.927287 | 0.016194 | 0.042128 |
| LOC113248593 | <a href="#">113248593</a> | 3.796438562 | 1.924647 | 6.74E-07 | 5.3E-06  |
| DNAJB1       | <a href="#">113247153</a> | 3.795523186 | 1.924299 | 5.77E-07 | 4.59E-06 |
| LOC113260369 | <a href="#">113260369</a> | 3.79468662  | 1.923981 | 1.12E-05 | 7.02E-05 |
| ADAMTSL2     | <a href="#">113266573</a> | 3.794410633 | 1.923876 | 0.000177 | 0.000838 |

|              |                           |             |          |          |          |
|--------------|---------------------------|-------------|----------|----------|----------|
| PREPL        | <a href="#">113246215</a> | 3.793631641 | 1.92358  | 3.1E-07  | 2.59E-06 |
| ATP5MF       | <a href="#">113267913</a> | 3.792405215 | 1.923113 | 2.22E-06 | 1.59E-05 |
| TBRG4        | <a href="#">113257719</a> | 3.784260079 | 1.920011 | 2.91E-05 | 0.000165 |
| GRASP        | <a href="#">113257465</a> | 3.782491444 | 1.919337 | 5.44E-05 | 0.000289 |
| MSI2         | <a href="#">113268852</a> | 3.77986431  | 1.918334 | 3.61E-07 | 2.98E-06 |
| TMEM11       | <a href="#">113271315</a> | 3.779381716 | 1.91815  | 1.14E-06 | 8.62E-06 |
| NDUFAF2      | <a href="#">113255305</a> | 3.775868104 | 1.916808 | 0.000761 | 0.003036 |
| NDUFS6       | <a href="#">113260793</a> | 3.774786582 | 1.916395 | 3.06E-06 | 2.14E-05 |
| GOLGA4       | <a href="#">113253773</a> | 3.770632602 | 1.914807 | 7.78E-05 | 0.0004   |
| CALR3        | <a href="#">113256650</a> | 3.770474155 | 1.914746 | 0.00055  | 0.00228  |
| DEXI         | <a href="#">113270801</a> | 3.767847945 | 1.913741 | 8.17E-07 | 6.34E-06 |
| LOC113246871 | <a href="#">113246871</a> | 3.763990755 | 1.912263 | 2.32E-06 | 1.65E-05 |
| LOC113264253 | <a href="#">113264253</a> | 3.762002117 | 1.911501 | 0.000197 | 0.000917 |
| TMOD1        | <a href="#">113260426</a> | 3.761371318 | 1.911259 | 0.00014  | 0.000676 |
| VAMP2        | <a href="#">113271170</a> | 3.761354847 | 1.911252 | 3.85E-06 | 2.65E-05 |
| PPM1L        | <a href="#">113254142</a> | 3.758561175 | 1.91018  | 2.06E-05 | 0.00012  |
| NOS3         | <a href="#">113241474</a> | 3.757553192 | 1.909794 | 1.25E-05 | 7.72E-05 |
| DMAC2L       | <a href="#">113266076</a> | 3.75632709  | 1.909323 | 7.66E-05 | 0.000394 |
| REPIN1       | <a href="#">113241464</a> | 3.753905154 | 1.908392 | 1.61E-07 | 1.43E-06 |
| CELF5        | <a href="#">113242796</a> | 3.752849238 | 1.907986 | 0.00181  | 0.006454 |
| EPB41L4B     | <a href="#">113260640</a> | 3.749679863 | 1.906767 | 0.000149 | 0.000715 |
| AMACR        | <a href="#">113260868</a> | 3.748598083 | 1.906351 | 1.66E-05 | 9.9E-05  |
| CUNH3orf18   | <a href="#">113256920</a> | 3.74835387  | 1.906257 | 0.00078  | 0.003101 |
| TMEM184A     | <a href="#">113247730</a> | 3.742373001 | 1.903953 | 0.00104  | 0.003981 |
| IGFALS       | <a href="#">113245094</a> | 3.742304539 | 1.903927 | 1.03E-05 | 6.52E-05 |
| SMIM20       | <a href="#">113266763</a> | 3.740271041 | 1.903143 | 9.98E-06 | 6.31E-05 |
| SBDS         | <a href="#">113267760</a> | 3.740005167 | 1.90304  | 5.13E-06 | 3.45E-05 |
| KCNN3        | <a href="#">113245302</a> | 3.732582874 | 1.900174 | 0.000389 | 0.001682 |

|              |                           |             |          |          |          |
|--------------|---------------------------|-------------|----------|----------|----------|
| OXA1L        | <a href="#">113246043</a> | 3.729845145 | 1.899116 | 0.000117 | 0.000576 |
| LCMT1        | <a href="#">113267594</a> | 3.72913362  | 1.89884  | 1.2E-06  | 8.98E-06 |
| SLC4A3       | <a href="#">113250414</a> | 3.728332035 | 1.89853  | 0.000489 | 0.002057 |
| HEYL         | <a href="#">113268247</a> | 3.728261085 | 1.898503 | 5.07E-07 | 4.07E-06 |
| LOC113246846 | <a href="#">113246846</a> | 3.716889029 | 1.894096 | 6.56E-06 | 4.32E-05 |
| LRRC43       | <a href="#">113266928</a> | 3.71688257  | 1.894093 | 0.001059 | 0.004045 |
| TEF          | <a href="#">113241732</a> | 3.714435706 | 1.893143 | 6.57E-06 | 4.32E-05 |
| MALL         | <a href="#">113242244</a> | 3.710609646 | 1.891656 | 0.00064  | 0.002609 |
| MEIOC        | <a href="#">113265676</a> | 3.708354466 | 1.890779 | 0.000312 | 0.001383 |
| TSNARE1      | <a href="#">113247953</a> | 3.700501604 | 1.887721 | 0.000125 | 0.000611 |
| LOC113247922 | <a href="#">113247922</a> | 3.695477365 | 1.885761 | 1.27E-05 | 7.8E-05  |
| POMGNT1      | <a href="#">113254729</a> | 3.692434443 | 1.884572 | 8.11E-06 | 5.22E-05 |
| GYG1         | <a href="#">113254042</a> | 3.691748289 | 1.884304 | 0.000867 | 0.003403 |
| CUNH6orf106  | <a href="#">113243827</a> | 3.690584246 | 1.883849 | 0.000256 | 0.00116  |
| LOC113242783 | <a href="#">113242783</a> | 3.684791335 | 1.881583 | 0.000235 | 0.001076 |
| LOC113254636 | <a href="#">113254636</a> | 3.681904493 | 1.880452 | 3.77E-06 | 2.6E-05  |
| NDUFA4L2     | <a href="#">113256390</a> | 3.677301083 | 1.878647 | 0.001745 | 0.006249 |
| LOC113247877 | <a href="#">113247877</a> | 3.676961928 | 1.878514 | 0.001742 | 0.006242 |
| POLDIP2      | <a href="#">113269025</a> | 3.676221558 | 1.878224 | 4.13E-06 | 2.82E-05 |
| CDKL5        | <a href="#">113242254</a> | 3.675688127 | 1.878014 | 0.00034  | 0.00149  |
| LOC113241423 | <a href="#">113241423</a> | 3.667294269 | 1.874716 | 0.000627 | 0.00256  |
| ACTR3B       | <a href="#">113241507</a> | 3.657492366 | 1.870855 | 1.11E-06 | 8.39E-06 |
| EEF1D        | <a href="#">113247655</a> | 3.65569526  | 1.870146 | 0.001422 | 0.005241 |
| RASD2        | <a href="#">113256004</a> | 3.653705827 | 1.86936  | 0.001031 | 0.003954 |
| CATSPERD     | <a href="#">113242861</a> | 3.65150505  | 1.868491 | 0.001273 | 0.004759 |
| ATPAF1       | <a href="#">113254713</a> | 3.650832753 | 1.868226 | 1.08E-06 | 8.19E-06 |
| SPOCK2       | <a href="#">113259155</a> | 3.650575148 | 1.868124 | 2.17E-05 | 0.000126 |
| ROMO1        | <a href="#">113258545</a> | 3.65005854  | 1.86792  | 4.67E-06 | 3.17E-05 |

|              |                           |             |          |          |          |
|--------------|---------------------------|-------------|----------|----------|----------|
| ZMAT5        | <a href="#">113245019</a> | 3.645539942 | 1.866133 | 2.27E-05 | 0.000131 |
| INSYN1       | <a href="#">113240951</a> | 3.644654032 | 1.865782 | 0.003466 | 0.011343 |
| LRRTM2       | <a href="#">113261797</a> | 3.644102694 | 1.865564 | 0.002992 | 0.009998 |
| DCAF6        | <a href="#">113262875</a> | 3.634561826 | 1.861781 | 0.000659 | 0.002677 |
| CUNH9orf16   | <a href="#">113266457</a> | 3.63428294  | 1.861671 | 3.14E-05 | 0.000175 |
| ZNF391       | <a href="#">113264258</a> | 3.632274446 | 1.860873 | 2.25E-05 | 0.00013  |
| CCDC136      | <a href="#">113263909</a> | 3.631012608 | 1.860372 | 4.25E-05 | 0.00023  |
| ZYG11B       | <a href="#">113254661</a> | 3.626846199 | 1.858716 | 4E-05    | 0.000218 |
| MRPL21       | <a href="#">113243993</a> | 3.615653444 | 1.854256 | 8.04E-06 | 5.18E-05 |
| RAPGEF1      | <a href="#">113266537</a> | 3.614830168 | 1.853928 | 1.72E-05 | 0.000103 |
| FASTK        | <a href="#">113241480</a> | 3.611712036 | 1.852683 | 7.63E-06 | 4.95E-05 |
| NOX4         | <a href="#">113269421</a> | 3.61000922  | 1.852003 | 0.002226 | 0.007732 |
| LOC113247021 | <a href="#">113247021</a> | 3.606306538 | 1.850522 | 0.001393 | 0.005149 |
| YPEL2        | <a href="#">113268888</a> | 3.605804345 | 1.850321 | 2.2E-05  | 0.000128 |
| AVPI1        | <a href="#">113251796</a> | 3.603725364 | 1.849489 | 0.000616 | 0.002525 |
| PLEKHH3      | <a href="#">113265409</a> | 3.603014788 | 1.849205 | 3.91E-06 | 2.69E-05 |
| EML1         | <a href="#">113267272</a> | 3.601332967 | 1.848531 | 0.000235 | 0.001077 |
| PIH1D1       | <a href="#">113243302</a> | 3.599848866 | 1.847936 | 2.04E-06 | 1.47E-05 |
| CGNL1        | <a href="#">113269670</a> | 3.59961167  | 1.847841 | 2.86E-05 | 0.000162 |
| ANO5         | <a href="#">113265108</a> | 3.598247884 | 1.847295 | 0.006651 | 0.019871 |
| GMPS         | <a href="#">113254098</a> | 3.593739088 | 1.845486 | 0.000134 | 0.000651 |
| SLC7A6OS     | <a href="#">113252408</a> | 3.592077977 | 1.844819 | 1.13E-05 | 7.03E-05 |
| NDUFB5       | <a href="#">113254753</a> | 5.182254423 | 2.37358  | 6.48E-09 | 7.35E-08 |
| NDUFS4       | <a href="#">113263912</a> | 5.180952033 | 2.373217 | 6.79E-08 | 6.49E-07 |
| PDE4B        | <a href="#">113254561</a> | 5.176978039 | 2.37211  | 3.17E-07 | 2.64E-06 |
| ACYP2        | <a href="#">113245706</a> | 5.16460707  | 2.368659 | 1.02E-05 | 6.45E-05 |
| TAGLN        | <a href="#">113260017</a> | 5.162970495 | 2.368201 | 1.82E-07 | 1.6E-06  |
| JAG2         | <a href="#">113267148</a> | 5.154148089 | 2.365734 | 4.1E-09  | 4.82E-08 |

|              |                           |             |          |          |          |
|--------------|---------------------------|-------------|----------|----------|----------|
| MRPL33       | <a href="#">113240736</a> | 5.14920264  | 2.364349 | 5.08E-08 | 4.95E-07 |
| KIAA1217     | <a href="#">113241331</a> | 5.142682744 | 2.362521 | 9.76E-10 | 1.31E-08 |
| BZW2         | <a href="#">113261015</a> | 5.142298357 | 2.362413 | 2.76E-07 | 2.33E-06 |
| MAP3K7CL     | <a href="#">113267437</a> | 5.125506677 | 2.357695 | 2.11E-06 | 1.52E-05 |
| FAM83C       | <a href="#">113258536</a> | 5.124313321 | 2.357359 | 1.91E-05 | 0.000112 |
| ACTA2        | <a href="#">113258969</a> | 5.116930042 | 2.355279 | 1.19E-09 | 1.57E-08 |
| RNF225       | <a href="#">113248032</a> | 5.116265534 | 2.355091 | 7.65E-05 | 0.000394 |
| LOC113244568 | <a href="#">113244568</a> | 5.109196029 | 2.353096 | 8.37E-05 | 0.000427 |
| LOC113266806 | <a href="#">113266806</a> | 5.09912202  | 2.350249 | 0.002569 | 0.008747 |
| VDAC3        | <a href="#">113245581</a> | 5.097905706 | 2.349905 | 4.07E-05 | 0.000221 |
| SULF2        | <a href="#">113258690</a> | 5.091898189 | 2.348204 | 1.15E-06 | 8.66E-06 |
| LOC113254515 | <a href="#">113254515</a> | 5.08986265  | 2.347627 | 0.000189 | 0.000887 |
| MAFF         | <a href="#">113241783</a> | 5.088669802 | 2.347289 | 3.79E-08 | 3.77E-07 |
| NDUFA8       | <a href="#">113266369</a> | 5.088070083 | 2.347119 | 1.56E-06 | 1.15E-05 |
| DNASE1L1     | <a href="#">113247843</a> | 5.041284203 | 2.333791 | 7.82E-07 | 6.08E-06 |
| NHLRC1       | <a href="#">113264504</a> | 5.032565712 | 2.331294 | 1.38E-05 | 8.46E-05 |
| DKK3         | <a href="#">113246270</a> | 5.001037803 | 2.322228 | 0.00013  | 0.000631 |
| IRAK1BP1     | <a href="#">113261094</a> | 4.993969694 | 2.320187 | 2.14E-06 | 1.54E-05 |
| HOXA7        | <a href="#">113262001</a> | 4.990864408 | 2.31929  | 5.66E-07 | 4.51E-06 |
| ARPP19       | <a href="#">113269638</a> | 4.98805239  | 2.318477 | 2.94E-06 | 2.06E-05 |
| LOC113248616 | <a href="#">113248616</a> | 4.982546716 | 2.316883 | 2.11E-08 | 2.18E-07 |
| LOC113252908 | <a href="#">113252908</a> | 4.973140037 | 2.314157 | 1.29E-05 | 7.93E-05 |
| IMMP2L       | <a href="#">113262909</a> | 4.971730147 | 2.313748 | 3.44E-07 | 2.85E-06 |
| SUSD4        | <a href="#">113262898</a> | 4.968029602 | 2.312674 | 0.000622 | 0.002543 |
| PKD2         | <a href="#">113265612</a> | 4.967713081 | 2.312582 | 3.65E-06 | 2.52E-05 |
| ATP5MPL      | <a href="#">113267204</a> | 4.958596821 | 2.309932 | 2.1E-06  | 1.51E-05 |
| ACADS        | <a href="#">113267053</a> | 4.957977519 | 2.309752 | 2.71E-06 | 1.91E-05 |
| LYSMD1       | <a href="#">113246163</a> | 4.952779437 | 2.308238 | 6.55E-08 | 6.27E-07 |

|              |                           |             |          |          |          |
|--------------|---------------------------|-------------|----------|----------|----------|
| SDHB         | <a href="#">113270447</a> | 4.950619086 | 2.307609 | 1.91E-06 | 1.38E-05 |
| HIF3A        | <a href="#">113243399</a> | 4.946625659 | 2.306445 | 0.00019  | 0.000888 |
| VDAC1        | <a href="#">113261734</a> | 4.94236777  | 2.305202 | 0.000139 | 0.000671 |
| HOMER3       | <a href="#">113256738</a> | 4.941869015 | 2.305057 | 3.26E-09 | 3.93E-08 |
| IGSF23       | <a href="#">113243462</a> | 4.918616999 | 2.298253 | 4.02E-05 | 0.000219 |
| MFN2         | <a href="#">113270495</a> | 4.918232638 | 2.29814  | 6.26E-06 | 4.14E-05 |
| CUEDC1       | <a href="#">113268859</a> | 4.908684331 | 2.295336 | 7.67E-08 | 7.26E-07 |
| CYR61        | <a href="#">113254464</a> | 4.908344555 | 2.295237 | 1.77E-08 | 1.86E-07 |
| TEX29        | <a href="#">113248531</a> | 4.904636985 | 2.294146 | 8.51E-06 | 5.46E-05 |
| LOC113257882 | <a href="#">113257882</a> | 4.90434679  | 2.294061 | 0.000108 | 0.000539 |
| NDUFA9       | <a href="#">113257995</a> | 4.898221765 | 2.292258 | 1.11E-06 | 8.39E-06 |
| ATP5MC2      | <a href="#">113257544</a> | 4.896569563 | 2.291771 | 2.28E-05 | 0.000132 |
| SLC25A11     | <a href="#">113271067</a> | 4.883670965 | 2.287966 | 1.78E-06 | 1.3E-05  |
| PPP1R3F      | <a href="#">113265953</a> | 4.880940524 | 2.287159 | 1.24E-06 | 9.29E-06 |
| MAGIX        | <a href="#">113265825</a> | 4.876353542 | 2.285803 | 2.25E-07 | 1.93E-06 |
| KHDRBS3      | <a href="#">113252694</a> | 4.873685864 | 2.285013 | 0.000129 | 0.000629 |
| SYT7         | <a href="#">113246992</a> | 4.870581233 | 2.284094 | 8.28E-07 | 6.41E-06 |
| SLC25A30     | <a href="#">113251350</a> | 4.87050487  | 2.284071 | 1.72E-08 | 1.81E-07 |
| SUCLG1       | <a href="#">113243306</a> | 4.869676356 | 2.283826 | 8.45E-05 | 0.000431 |
| NEU3         | <a href="#">113269322</a> | 4.864477853 | 2.282285 | 8.99E-09 | 9.98E-08 |
| LOC113261568 | <a href="#">113261568</a> | 4.863444805 | 2.281979 | 1.16E-08 | 1.26E-07 |
| TOB1         | <a href="#">113265636</a> | 4.861364096 | 2.281361 | 6.93E-08 | 6.61E-07 |
| SVIL         | <a href="#">113244243</a> | 4.860904544 | 2.281225 | 3.36E-05 | 0.000187 |
| CIPC         | <a href="#">113270299</a> | 4.860780052 | 2.281188 | 3.53E-09 | 4.21E-08 |
| CFAP54       | <a href="#">113256123</a> | 4.850251988 | 2.27806  | 0.000331 | 0.001457 |
| TNFRSF12A    | <a href="#">113245425</a> | 4.846130893 | 2.276833 | 0.000362 | 0.001577 |
| KIAA1755     | <a href="#">113258589</a> | 4.842617008 | 2.275787 | 8.77E-05 | 0.000446 |
| ATP5F1A      | <a href="#">113253374</a> | 4.840685563 | 2.275211 | 0.001838 | 0.006532 |

|              |                           |             |          |          |          |
|--------------|---------------------------|-------------|----------|----------|----------|
| TRIM45       | <a href="#">113244373</a> | 4.840650775 | 2.275201 | 2.45E-08 | 2.5E-07  |
| LOC113257633 | <a href="#">113257633</a> | 4.83940976  | 2.274831 | 3.44E-09 | 4.12E-08 |
| TENM1        | <a href="#">113270934</a> | 4.835496757 | 2.273664 | 0.000142 | 0.000685 |
| ZSCAN12      | <a href="#">113248152</a> | 4.815036701 | 2.267547 | 1.75E-07 | 1.54E-06 |
| LOC113244843 | <a href="#">113244843</a> | 4.813134009 | 2.266977 | 6.72E-06 | 4.41E-05 |
| LOC113258460 | <a href="#">113258460</a> | 4.808523112 | 2.265594 | 9.73E-05 | 0.000489 |
| HOXD9        | <a href="#">113250743</a> | 4.807298689 | 2.265226 | 0.0002   | 0.000929 |
| NDUFB11      | <a href="#">113265993</a> | 4.801283092 | 2.26342  | 8.75E-07 | 6.74E-06 |
| LOC113249623 | <a href="#">113249623</a> | 4.791451023 | 2.260463 | 0.012365 | 0.03346  |
| ITIH3        | <a href="#">113256968</a> | 4.786123389 | 2.258858 | 0.000112 | 0.000555 |
| PPP3CB       | <a href="#">113259177</a> | 4.78374038  | 2.258139 | 4.94E-07 | 3.98E-06 |
| INHBB        | <a href="#">113263463</a> | 4.775124396 | 2.255538 | 6.33E-05 | 0.000332 |
| LOC113251521 | <a href="#">113251521</a> | 4.766539513 | 2.252942 | 0.002711 | 0.009173 |
| FMC1         | <a href="#">113264958</a> | 4.754493474 | 2.249292 | 2.01E-09 | 2.54E-08 |
| CISD1        | <a href="#">113259063</a> | 4.752934296 | 2.248818 | 1.33E-06 | 9.91E-06 |
| COMP         | <a href="#">113256730</a> | 4.744476845 | 2.246249 | 0.009866 | 0.027616 |
| CLCN4        | <a href="#">113240744</a> | 4.73774328  | 2.2442   | 3E-07    | 2.51E-06 |
| CHST10       | <a href="#">113247050</a> | 4.734594766 | 2.243241 | 5.93E-09 | 6.77E-08 |
| CCDC28B      | <a href="#">113268366</a> | 4.726893461 | 2.240892 | 7.64E-06 | 4.96E-05 |
| EFCC1        | <a href="#">113257241</a> | 4.726197745 | 2.24068  | 3.25E-05 | 0.000181 |
| TGFB2        | <a href="#">113268733</a> | 4.711644914 | 2.236231 | 1.79E-08 | 1.88E-07 |
| LOC113246281 | <a href="#">113246281</a> | 4.706216007 | 2.234568 | 0.000409 | 0.001754 |
| SLC14A2      | <a href="#">113253366</a> | 4.698756455 | 2.232279 | 0.000488 | 0.002054 |
| ABLIM1       | <a href="#">113251961</a> | 4.697014479 | 2.231744 | 2.1E-05  | 0.000122 |
| NFIC         | <a href="#">113242797</a> | 4.687890322 | 2.228939 | 9.2E-07  | 7.06E-06 |
| LOC113247619 | <a href="#">113247619</a> | 4.685299412 | 2.228141 | 2.21E-05 | 0.000128 |
| ADSL         | <a href="#">113241749</a> | 4.682097268 | 2.227155 | 8.61E-08 | 8.04E-07 |
| KCNJ12       | <a href="#">113271319</a> | 4.675115531 | 2.225002 | 1.92E-05 | 0.000113 |

|              |                           |             |          |          |          |
|--------------|---------------------------|-------------|----------|----------|----------|
| CUTC         | <a href="#">113251818</a> | 4.665234126 | 2.221949 | 9.21E-09 | 1.02E-07 |
| COL11A2      | <a href="#">113243790</a> | 4.660151595 | 2.220377 | 3.6E-05  | 0.000199 |
| FAM124B      | <a href="#">113250394</a> | 4.659211798 | 2.220086 | 0.000186 | 0.000874 |
| SGIP1        | <a href="#">113254558</a> | 4.646785809 | 2.216233 | 0.000167 | 0.000793 |
| CES1         | <a href="#">113252254</a> | 4.64672847  | 2.216215 | 4.11E-06 | 2.82E-05 |
| LOC113256842 | <a href="#">113256842</a> | 4.63743519  | 2.213327 | 6.71E-05 | 0.00035  |
| LOC113248649 | <a href="#">113248649</a> | 4.631006825 | 2.211326 | 7.68E-09 | 8.58E-08 |
| ZNF358       | <a href="#">113242937</a> | 4.63042649  | 2.211145 | 5.52E-06 | 3.69E-05 |
| LOC113242741 | <a href="#">113242741</a> | 4.627428619 | 2.210211 | 1.55E-06 | 1.14E-05 |
| MPI          | <a href="#">113240979</a> | 4.622105896 | 2.20855  | 3.32E-09 | 3.99E-08 |
| PLEKHB1      | <a href="#">113269294</a> | 4.617135661 | 2.206998 | 2.75E-05 | 0.000156 |
| TRIP10       | <a href="#">113242888</a> | 4.611715448 | 2.205303 | 4.22E-05 | 0.000229 |
| NDUFV2       | <a href="#">113253220</a> | 4.610394365 | 2.20489  | 1.13E-06 | 8.51E-06 |
| MRPS5        | <a href="#">113242194</a> | 4.607810707 | 2.204081 | 2.51E-07 | 2.13E-06 |
| ATP5F1C      | <a href="#">113241155</a> | 4.606158927 | 2.203564 | 0.000134 | 0.000653 |
| CNGB1        | <a href="#">113252297</a> | 4.605728598 | 2.203429 | 0.000224 | 0.00103  |
| KLHL21       | <a href="#">113270566</a> | 4.601924045 | 2.202237 | 2.21E-08 | 2.28E-07 |
| CASKIN1      | <a href="#">113245186</a> | 4.59980393  | 2.201572 | 4.62E-05 | 0.000249 |
| DDAH1        | <a href="#">113254466</a> | 4.593277413 | 2.199524 | 3.94E-06 | 2.71E-05 |
| CCDC141      | <a href="#">113250711</a> | 4.581733451 | 2.195894 | 1.16E-05 | 7.21E-05 |
| CUNH11orf71  | <a href="#">113260034</a> | 4.578405716 | 2.194845 | 0.000129 | 0.000628 |
| MAP7D1       | <a href="#">113268291</a> | 4.570537539 | 2.192364 | 8.82E-06 | 5.64E-05 |
| PANK4        | <a href="#">113270600</a> | 4.566698907 | 2.191152 | 5.44E-09 | 6.25E-08 |
| NR1D2        | <a href="#">113253869</a> | 4.562547466 | 2.18984  | 2.05E-05 | 0.00012  |
| RHOBTB1      | <a href="#">113259077</a> | 4.561696656 | 2.189571 | 3.58E-07 | 2.96E-06 |
| RERGL        | <a href="#">113257835</a> | 4.557411057 | 2.188215 | 0.000253 | 0.001147 |
| LOC113245319 | <a href="#">113245319</a> | 4.557249157 | 2.188163 | 0.002256 | 0.007816 |
| MYPOP        | <a href="#">113243407</a> | 4.551043222 | 2.186197 | 1.9E-06  | 1.38E-05 |

|              |                           |             |          |          |          |
|--------------|---------------------------|-------------|----------|----------|----------|
| SYN1         | <a href="#">113265974</a> | 4.545954548 | 2.184583 | 5.48E-05 | 0.000291 |
| MAPRE3       | <a href="#">113270924</a> | 4.535290107 | 2.181195 | 5.97E-05 | 0.000315 |
| ATP5PB       | <a href="#">113244431</a> | 4.535215669 | 2.181171 | 0.000435 | 0.00185  |
| MRPS24       | <a href="#">113257987</a> | 4.530834622 | 2.179777 | 5.94E-08 | 5.71E-07 |
| ATP5PD       | <a href="#">113244651</a> | 4.530074077 | 2.179535 | 0.000312 | 0.001383 |
| HSF4         | <a href="#">113252349</a> | 4.521528408 | 2.176811 | 0.000108 | 0.000536 |
| PAM16        | <a href="#">113270852</a> | 4.517055085 | 2.175383 | 4.24E-08 | 4.2E-07  |
| CLIP1        | <a href="#">113266923</a> | 4.516352661 | 2.175158 | 7.4E-06  | 4.82E-05 |
| RASSF8       | <a href="#">113257786</a> | 4.512926943 | 2.174063 | 1.95E-07 | 1.7E-06  |
| LOC113264441 | <a href="#">113264441</a> | 4.504072863 | 2.17123  | 5.39E-05 | 0.000286 |
| VSIG10L      | <a href="#">113247243</a> | 4.500321071 | 2.170028 | 8.84E-05 | 0.000449 |
| ATP5F1B      | <a href="#">113256410</a> | 4.498354309 | 2.169397 | 0.003664 | 0.011886 |
| THBS2        | <a href="#">113247125</a> | 4.494986643 | 2.168317 | 0.006076 | 0.018431 |
| SLC2A4RG     | <a href="#">113258822</a> | 4.49131406  | 2.167138 | 7.06E-06 | 4.61E-05 |
| PYURF        | <a href="#">113263153</a> | 4.489861547 | 2.166671 | 1.31E-07 | 1.18E-06 |
| NDUFB8       | <a href="#">113251835</a> | 4.489064163 | 2.166415 | 3.95E-06 | 2.72E-05 |
| IMPDH2       | <a href="#">113256856</a> | 4.48469474  | 2.16501  | 0.000203 | 0.000942 |
| SMIM26       | <a href="#">113258309</a> | 4.478474566 | 2.163007 | 9.85E-07 | 7.52E-06 |
| ZNF579       | <a href="#">113247353</a> | 4.477947008 | 2.162837 | 2.4E-08  | 2.46E-07 |
| LEAP2        | <a href="#">113261728</a> | 4.476806722 | 2.16247  | 0.000265 | 0.001195 |
| TSLP         | <a href="#">113254959</a> | 4.475269942 | 2.161975 | 0.000423 | 0.001808 |
| KREMEN1      | <a href="#">113245007</a> | 4.462405626 | 2.157822 | 1.69E-05 | 0.000101 |
| SLC6A8       | <a href="#">113247834</a> | 4.46073902  | 2.157283 | 1.89E-07 | 1.65E-06 |
| MPPED2       | <a href="#">113265079</a> | 4.455032552 | 2.155436 | 0.00019  | 0.000888 |
| NFATC1       | <a href="#">113253544</a> | 4.454581846 | 2.15529  | 4.64E-08 | 4.55E-07 |
| SERHL2       | <a href="#">113241696</a> | 4.454385124 | 2.155226 | 6.27E-05 | 0.00033  |
| KCNMB2       | <a href="#">113254860</a> | 4.449935514 | 2.153784 | 0.000377 | 0.001633 |
| SMIM12       | <a href="#">113268319</a> | 4.448409515 | 2.15329  | 1.17E-07 | 1.06E-06 |

|          |                           |             |          |          |          |
|----------|---------------------------|-------------|----------|----------|----------|
| DPH3     | <a href="#">113253905</a> | 4.444907507 | 2.152153 | 2.72E-07 | 2.3E-06  |
| ATP8B3   | <a href="#">113242657</a> | 4.436335544 | 2.149368 | 0.000921 | 0.00358  |
| DHDH     | <a href="#">113243321</a> | 4.436195559 | 2.149323 | 0.001094 | 0.004163 |
| DNAJB6   | <a href="#">113241530</a> | 4.434751064 | 2.148853 | 7.28E-08 | 6.92E-07 |
| NDUFC2   | <a href="#">113269364</a> | 4.428130344 | 2.146698 | 8.04E-07 | 6.24E-06 |
| FMO2     | <a href="#">113262845</a> | 4.42664973  | 2.146215 | 2.12E-06 | 1.52E-05 |
| RAB12    | <a href="#">113253223</a> | 4.425734367 | 2.145917 | 1.39E-07 | 1.25E-06 |
| OPTN     | <a href="#">113241074</a> | 4.425208502 | 2.145745 | 1.15E-05 | 7.17E-05 |
| ABCA5    | <a href="#">113265229</a> | 4.420612284 | 2.144246 | 6.71E-08 | 6.41E-07 |
| HMCN1    | <a href="#">113262754</a> | 4.416665253 | 2.142957 | 3.74E-05 | 0.000206 |
| GTF3A    | <a href="#">113251205</a> | 4.412226894 | 2.141507 | 5.24E-08 | 5.1E-07  |
| JUN      | <a href="#">113254611</a> | 4.397946738 | 2.13683  | 1.88E-06 | 1.36E-05 |
| SLC16A10 | <a href="#">113264727</a> | 4.392778297 | 2.135134 | 4.82E-06 | 3.27E-05 |
| NMS      | <a href="#">113247084</a> | 4.39199225  | 2.134876 | 0.000262 | 0.001184 |
| BTC      | <a href="#">113263271</a> | 4.376733562 | 2.129855 | 0.000453 | 0.001918 |
| SLC20A2  | <a href="#">113245534</a> | 4.376228241 | 2.129688 | 1.02E-05 | 6.42E-05 |
| PIGY     | <a href="#">113263154</a> | 4.375063498 | 2.129304 | 5.61E-07 | 4.48E-06 |
| KCNJ2    | <a href="#">113265224</a> | 4.356441672 | 2.12315  | 0.000404 | 0.001739 |
| RASGRF2  | <a href="#">113255154</a> | 4.356300926 | 2.123104 | 6.31E-07 | 4.99E-06 |
| CDC34    | <a href="#">113242694</a> | 4.355551984 | 2.122856 | 1.63E-05 | 9.78E-05 |
| ZNF32    | <a href="#">113243142</a> | 4.34553578  | 2.119534 | 1.53E-06 | 1.13E-05 |
| TRMT12   | <a href="#">113252745</a> | 4.342817029 | 2.118631 | 5.25E-07 | 4.21E-06 |
| ZNF30    | <a href="#">113244783</a> | 4.342500574 | 2.118526 | 9.2E-06  | 5.86E-05 |
| EGLN1    | <a href="#">113259033</a> | 4.342314107 | 2.118464 | 7.61E-08 | 7.21E-07 |
| PARD6A   | <a href="#">113252374</a> | 4.33358364  | 2.115561 | 0.000371 | 0.001613 |
| TBC1D4   | <a href="#">113251422</a> | 4.329015358 | 2.114039 | 1.11E-07 | 1.01E-06 |
| TMEM108  | <a href="#">113253944</a> | 4.325687774 | 2.11293  | 5.28E-05 | 0.000282 |
| LACTB2   | <a href="#">113253065</a> | 4.321230847 | 2.111442 | 1.89E-07 | 1.65E-06 |

|              |                           |             |          |          |          |
|--------------|---------------------------|-------------|----------|----------|----------|
| NDUFB6       | <a href="#">113260540</a> | 4.314698538 | 2.10926  | 1.49E-06 | 1.1E-05  |
| ALKBH3       | <a href="#">113265015</a> | 4.314252031 | 2.10911  | 1.54E-08 | 1.64E-07 |
| CHRM4        | <a href="#">113264986</a> | 4.311736002 | 2.108269 | 0.00064  | 0.002609 |
| MANEAL       | <a href="#">113268270</a> | 4.307699492 | 2.106918 | 0.000112 | 0.000557 |
| MEF2D        | <a href="#">113245229</a> | 4.307003588 | 2.106685 | 5.42E-08 | 5.26E-07 |
| SFXN4        | <a href="#">113251991</a> | 4.306582053 | 2.106543 | 1.07E-07 | 9.78E-07 |
| LIMCH1       | <a href="#">113262439</a> | 4.304482081 | 2.10584  | 1.42E-05 | 8.63E-05 |
| BBS5         | <a href="#">113250801</a> | 4.302286775 | 2.105104 | 0.000195 | 0.000912 |
| ZDHHC1       | <a href="#">113252362</a> | 4.30146684  | 2.104829 | 1.42E-05 | 8.63E-05 |
| PROCA1       | <a href="#">113269040</a> | 4.296028313 | 2.103004 | 1.44E-06 | 1.07E-05 |
| MRPL12       | <a href="#">113244509</a> | 4.295070502 | 2.102682 | 2.59E-07 | 2.19E-06 |
| EVA1C        | <a href="#">113265647</a> | 4.290495384 | 2.101144 | 8.16E-05 | 0.000418 |
| LOC113241107 | <a href="#">113241107</a> | 4.285042243 | 2.099309 | 2.61E-05 | 0.000149 |
| ECPAS        | <a href="#">113260320</a> | 4.282533375 | 2.098464 | 0.000118 | 0.000583 |
| DST          | <a href="#">113261161</a> | 4.280889485 | 2.097911 | 3.36E-05 | 0.000187 |
| EPHA4        | <a href="#">113250413</a> | 4.278272915 | 2.097029 | 0.000117 | 0.000579 |
| WNT10B       | <a href="#">113257662</a> | 4.270749728 | 2.094489 | 0.000307 | 0.001367 |
| APOO         | <a href="#">113242225</a> | 4.270280369 | 2.094331 | 1.18E-06 | 8.89E-06 |
| RASSF9       | <a href="#">113256205</a> | 4.26931494  | 2.094005 | 0.000526 | 0.002195 |
| TARSL2       | <a href="#">113263620</a> | 4.267616578 | 2.093431 | 4.15E-07 | 3.4E-06  |
| NDUFA6       | <a href="#">113241708</a> | 4.266184849 | 2.092946 | 1.75E-07 | 1.54E-06 |
| ZBTB16       | <a href="#">113260036</a> | 4.24982606  | 2.087404 | 1.04E-06 | 7.94E-06 |
| WNT4         | <a href="#">113268542</a> | 4.248253429 | 2.08687  | 0.000584 | 0.00241  |
| PLEKHM2      | <a href="#">113270664</a> | 4.245444324 | 2.085916 | 0.000313 | 0.001389 |
| NR4A2        | <a href="#">113250870</a> | 4.242651123 | 2.084966 | 0.000452 | 0.001916 |
| FHL5         | <a href="#">113264813</a> | 4.239836849 | 2.084009 | 0.000607 | 0.002489 |
| PGPEP1       | <a href="#">113256715</a> | 4.234070833 | 2.082045 | 9.51E-08 | 8.78E-07 |
| PHKB         | <a href="#">113252209</a> | 4.23405246  | 2.082039 | 1.97E-06 | 1.42E-05 |

|              |                           |             |          |          |          |
|--------------|---------------------------|-------------|----------|----------|----------|
| MLLT11       | <a href="#">113246131</a> | 4.22653532  | 2.079476 | 4.41E-08 | 4.36E-07 |
| R3HDM2       | <a href="#">113256386</a> | 4.222824325 | 2.078208 | 4.6E-05  | 0.000248 |
| KPNA4        | <a href="#">113254139</a> | 4.22064132  | 2.077462 | 1.94E-05 | 0.000114 |
| GPR17        | <a href="#">113263488</a> | 4.220098925 | 2.077277 | 0.000415 | 0.001778 |
| FGF1         | <a href="#">113255360</a> | 4.218316536 | 2.076667 | 3.56E-05 | 0.000197 |
| PDE8A        | <a href="#">113263738</a> | 4.218252776 | 2.076646 | 6.17E-07 | 4.89E-06 |
| WWP1         | <a href="#">113252973</a> | 4.217108757 | 2.076254 | 1.89E-05 | 0.000112 |
| KIF13A       | <a href="#">113264500</a> | 4.216663332 | 2.076102 | 3.55E-06 | 2.46E-05 |
| UBL4A        | <a href="#">113247812</a> | 4.216429425 | 2.076022 | 3.99E-07 | 3.27E-06 |
| PRRX1        | <a href="#">113262848</a> | 4.209858507 | 2.073772 | 3.37E-05 | 0.000187 |
| KLHL24       | <a href="#">113254479</a> | 4.208477995 | 2.073299 | 2.56E-07 | 2.17E-06 |
| ZFP37        | <a href="#">113266304</a> | 4.203456897 | 2.071576 | 7.66E-05 | 0.000394 |
| MMACHC       | <a href="#">113254743</a> | 4.201090669 | 2.070764 | 1.09E-05 | 6.87E-05 |
| ITGB4        | <a href="#">113244620</a> | 4.193272817 | 2.068077 | 8.74E-06 | 5.6E-05  |
| KLHL4        | <a href="#">113242173</a> | 4.186142972 | 2.065622 | 0.000222 | 0.001026 |
| ATP5F1D      | <a href="#">113242724</a> | 4.181534895 | 2.064033 | 0.000108 | 0.000536 |
| UBR3         | <a href="#">113250793</a> | 4.176652239 | 2.062347 | 1.19E-05 | 7.41E-05 |
| SEPT11       | <a href="#">113263245</a> | 4.174966201 | 2.061765 | 1.72E-07 | 1.52E-06 |
| LOC113271232 | <a href="#">113271232</a> | 4.167411137 | 2.059151 | 0.000237 | 0.001084 |
| MUL1         | <a href="#">113268565</a> | 4.166976009 | 2.059001 | 2.21E-07 | 1.9E-06  |
| HOXC8        | <a href="#">113257531</a> | 4.165178301 | 2.058378 | 0.014055 | 0.037336 |
| CARNMT1      | <a href="#">113269844</a> | 4.164692229 | 2.05821  | 2.07E-07 | 1.79E-06 |
| LOC113255247 | <a href="#">113255247</a> | 4.16329449  | 2.057726 | 1.84E-05 | 0.000109 |
| TEX2         | <a href="#">113265274</a> | 4.162424807 | 2.057424 | 5.9E-06  | 3.92E-05 |
| AMN1         | <a href="#">113257748</a> | 4.162101096 | 2.057312 | 7.24E-07 | 5.67E-06 |
| NFE2L1       | <a href="#">113265569</a> | 4.161381194 | 2.057062 | 4.84E-05 | 0.00026  |
| LOC113267950 | <a href="#">113267950</a> | 4.159962606 | 2.056571 | 8.16E-05 | 0.000418 |
| KRTCAP3      | <a href="#">113271234</a> | 4.159795322 | 2.056513 | 8.86E-05 | 0.000449 |

|              |                           |             |          |          |          |
|--------------|---------------------------|-------------|----------|----------|----------|
| PFN2         | <a href="#">113254055</a> | 4.157565657 | 2.055739 | 5.87E-05 | 0.00031  |
| TMEM136      | <a href="#">113259949</a> | 4.155904664 | 2.055163 | 4.45E-06 | 3.03E-05 |
| RELN         | <a href="#">113258887</a> | 4.151154847 | 2.053513 | 5.59E-05 | 0.000296 |
| FBXL22       | <a href="#">113240838</a> | 4.150241397 | 2.053195 | 0.000116 | 0.000573 |
| TOMM20       | <a href="#">113259006</a> | 4.139755496 | 2.049546 | 1.45E-05 | 8.81E-05 |
| TLN2         | <a href="#">113269702</a> | 4.138270747 | 2.049028 | 9.14E-06 | 5.82E-05 |
| PNPLA4       | <a href="#">113240758</a> | 4.136742947 | 2.048495 | 6.59E-06 | 4.33E-05 |
| CLIC5        | <a href="#">113261239</a> | 4.135311168 | 2.047996 | 1.68E-05 | 0.0001   |
| RRAGB        | <a href="#">113247969</a> | 4.13393493  | 2.047516 | 3.66E-07 | 3.02E-06 |
| FAM180B      | <a href="#">113264952</a> | 4.13102556  | 2.0465   | 0.002374 | 0.008163 |
| ANKRD9       | <a href="#">113267237</a> | 4.130931855 | 2.046467 | 3.66E-07 | 3.01E-06 |
| NDUFB7       | <a href="#">113247157</a> | 4.129473203 | 2.045958 | 1.6E-07  | 1.42E-06 |
| HSCB         | <a href="#">113245003</a> | 4.129402962 | 2.045933 | 4.48E-07 | 3.64E-06 |
| PABPC4       | <a href="#">113268249</a> | 4.127203821 | 2.045165 | 0.000167 | 0.000795 |
| ATP6V1G2     | <a href="#">113243710</a> | 4.126183016 | 2.044808 | 0.000181 | 0.000857 |
| FUNDC2       | <a href="#">113248346</a> | 4.12503991  | 2.044408 | 5.79E-07 | 4.6E-06  |
| TMEM161A     | <a href="#">113256742</a> | 4.122038757 | 2.043358 | 1.39E-07 | 1.25E-06 |
| RBFOX2       | <a href="#">113255999</a> | 4.12072284  | 2.042897 | 1.52E-05 | 9.17E-05 |
| SPATA24      | <a href="#">113261807</a> | 4.118593142 | 2.042152 | 0.000184 | 0.000868 |
| UBALD1       | <a href="#">113270843</a> | 4.111761441 | 2.039757 | 1.07E-07 | 9.81E-07 |
| COL4A4       | <a href="#">113250384</a> | 4.107943586 | 2.038416 | 0.001005 | 0.00387  |
| ATP5ME       | <a href="#">113245737</a> | 4.098735652 | 2.035179 | 4.14E-05 | 0.000225 |
| AGL          | <a href="#">113254363</a> | 4.097772001 | 2.03484  | 9.53E-05 | 0.00048  |
| NDUFS2       | <a href="#">113246718</a> | 4.095137646 | 2.033912 | 0.000278 | 0.001247 |
| SMIM1        | <a href="#">113270590</a> | 4.08809008  | 2.031427 | 1.98E-07 | 1.72E-06 |
| LOC113248801 | <a href="#">113248801</a> | 4.087076884 | 2.031069 | 0.000958 | 0.003708 |
| FAM131A      | <a href="#">113254262</a> | 4.086332039 | 2.030806 | 7.7E-07  | 5.99E-06 |
| RGS5         | <a href="#">113268681</a> | 4.07691845  | 2.027479 | 3.76E-05 | 0.000207 |

|              |                           |             |          |          |          |
|--------------|---------------------------|-------------|----------|----------|----------|
| CAMSAP1      | <a href="#">113266592</a> | 4.075745948 | 2.027064 | 8.14E-08 | 7.65E-07 |
| TMCC3        | <a href="#">113256152</a> | 4.074911414 | 2.026769 | 3.74E-05 | 0.000206 |
| NDUFS1       | <a href="#">113250544</a> | 4.066890228 | 2.023926 | 0.000103 | 0.000516 |
| PER2         | <a href="#">113249994</a> | 4.058257955 | 2.020861 | 3.27E-06 | 2.27E-05 |
| RDH14        | <a href="#">113270195</a> | 4.053619162 | 2.019211 | 1.92E-06 | 1.39E-05 |
| EGR1         | <a href="#">113261792</a> | 4.051715409 | 2.018533 | 6.34E-06 | 4.18E-05 |
| ASB8         | <a href="#">113257679</a> | 4.049849317 | 2.017868 | 3.98E-07 | 3.27E-06 |
| CUL5         | <a href="#">113260213</a> | 4.049377129 | 2.0177   | 8.47E-08 | 7.92E-07 |
| HIVEP2       | <a href="#">113259505</a> | 4.046843153 | 2.016797 | 1.62E-08 | 1.72E-07 |
| NDUFB4       | <a href="#">113252045</a> | 4.043033156 | 2.015438 | 1.81E-06 | 1.32E-05 |
| LOC113262535 | <a href="#">113262535</a> | 4.037970685 | 2.01363  | 5.29E-06 | 3.55E-05 |
| MFF          | <a href="#">113250383</a> | 4.036782188 | 2.013206 | 1.26E-05 | 7.77E-05 |
| AKAP1        | <a href="#">113268847</a> | 4.033968049 | 2.0122   | 1.39E-06 | 1.03E-05 |
| LOC113249853 | <a href="#">113249853</a> | 4.020081521 | 2.007225 | 0.001319 | 0.004908 |
| TSPAN15      | <a href="#">113258877</a> | 4.019772276 | 2.007114 | 0.000661 | 0.002682 |
| UBXN6        | <a href="#">113242833</a> | 4.01906     | 2.006858 | 5.3E-05  | 0.000282 |
| DNAJC19      | <a href="#">113254646</a> | 4.012187675 | 2.004389 | 2.02E-06 | 1.45E-05 |
| NREP         | <a href="#">113254998</a> | 4.002028071 | 2.000731 | 9.66E-06 | 6.12E-05 |
| CCDC43       | <a href="#">113265348</a> | 3.99904936  | 1.999657 | 2.42E-07 | 2.07E-06 |
| GPR21        | <a href="#">113266387</a> | 3.998009682 | 1.999282 | 0.000501 | 0.002103 |
| FBXO31       | <a href="#">113252169</a> | 3.997940902 | 1.999257 | 2.87E-05 | 0.000162 |
| TTC33        | <a href="#">113260928</a> | 3.997247036 | 1.999007 | 9.87E-07 | 7.53E-06 |
| CAMK2G       | <a href="#">113259192</a> | 3.996334056 | 1.998677 | 3.96E-05 | 0.000216 |
| DMD          | <a href="#">113265965</a> | 3.993562762 | 1.997676 | 5.4E-05  | 0.000287 |
| ZNF770       | <a href="#">113242069</a> | 3.993032363 | 1.997485 | 3.71E-07 | 3.05E-06 |
| HMGN3        | <a href="#">113261087</a> | 3.992598334 | 1.997328 | 4.32E-07 | 3.53E-06 |
| LOC113247902 | <a href="#">113247902</a> | 3.989548809 | 1.996226 | 0.000607 | 0.002491 |
| CHRNA1       | <a href="#">113250753</a> | 3.988745087 | 1.995935 | 0.000228 | 0.001045 |

|              |                           |             |          |          |          |
|--------------|---------------------------|-------------|----------|----------|----------|
| COQ7         | <a href="#">113270738</a> | 3.988084658 | 1.995696 | 3.95E-06 | 2.72E-05 |
| SLC25A20     | <a href="#">113256849</a> | 3.987713349 | 1.995562 | 1.35E-05 | 8.27E-05 |
| LZTS3        | <a href="#">113258399</a> | 3.985565032 | 1.994784 | 8.66E-05 | 0.000441 |
| IDH3B        | <a href="#">113258411</a> | 3.982968404 | 1.993844 | 5.09E-05 | 0.000273 |
| TWF2         | <a href="#">113256944</a> | 3.975715508 | 1.991215 | 7E-05    | 0.000364 |
| IGDCC4       | <a href="#">113241013</a> | 3.97353948  | 1.990425 | 2.47E-07 | 2.11E-06 |
| PDLIM7       | <a href="#">113264157</a> | 3.970432078 | 1.989296 | 6.55E-07 | 5.17E-06 |
| NDUFAF5      | <a href="#">113258328</a> | 3.96883445  | 1.988715 | 2.75E-05 | 0.000156 |
| HOXC9        | <a href="#">113257530</a> | 3.956446757 | 1.984205 | 0.002072 | 0.007251 |
| LOC113246178 | <a href="#">113246178</a> | 3.952464885 | 1.982753 | 1.64E-07 | 1.46E-06 |
| ISYNA1       | <a href="#">113256718</a> | 3.950539913 | 1.98205  | 7.59E-05 | 0.000391 |
| LOC113254727 | <a href="#">113254727</a> | 3.950483699 | 1.982029 | 0.000105 | 0.000525 |
| ATF3         | <a href="#">113262677</a> | 3.950300408 | 1.981962 | 3.97E-05 | 0.000217 |
| LOC113243815 | <a href="#">113243815</a> | 3.946587306 | 1.980606 | 2.02E-06 | 1.46E-05 |
| HADHB        | <a href="#">113270781</a> | 3.942160329 | 1.978986 | 0.000617 | 0.002527 |
| EIF4EBP1     | <a href="#">113262099</a> | 3.941308331 | 1.978675 | 5.23E-06 | 3.51E-05 |
| DEPTOR       | <a href="#">113252772</a> | 3.939841863 | 1.978138 | 5.72E-06 | 3.81E-05 |
| LOC113248580 | <a href="#">113248580</a> | 3.930596699 | 1.974748 | 1.38E-05 | 8.43E-05 |
| ZNF503       | <a href="#">113259209</a> | 3.928341924 | 1.973921 | 5.47E-07 | 4.37E-06 |
| KIF26A       | <a href="#">113267199</a> | 3.927020843 | 1.973435 | 1.74E-05 | 0.000104 |
| LOC113246863 | <a href="#">113246863</a> | 3.926702902 | 1.973318 | 0.001765 | 0.006308 |
| TRMT2B       | <a href="#">113244297</a> | 3.924733079 | 1.972595 | 0.000265 | 0.001197 |
| PFDN1        | <a href="#">113261816</a> | 3.922935319 | 1.971934 | 3.73E-07 | 3.07E-06 |
| COQ5         | <a href="#">113267040</a> | 3.921745646 | 1.971496 | 7.52E-07 | 5.86E-06 |
| TTC19        | <a href="#">113271258</a> | 3.915333658 | 1.969135 | 3.47E-07 | 2.88E-06 |
| ZSCAN9       | <a href="#">113248163</a> | 3.911955053 | 1.96789  | 0.000313 | 0.001388 |
| RASSF4       | <a href="#">113243126</a> | 3.906260256 | 1.965788 | 4.1E-06  | 2.81E-05 |
| NDUFB2       | <a href="#">113265140</a> | 3.903614752 | 1.964811 | 7.65E-06 | 4.96E-05 |

|              |                           |             |          |          |          |
|--------------|---------------------------|-------------|----------|----------|----------|
| LOC113259016 | <a href="#">113259016</a> | 3.900719432 | 1.96374  | 6.57E-06 | 4.32E-05 |
| INPP5E       | <a href="#">113248636</a> | 3.897670056 | 1.962612 | 4.61E-05 | 0.000248 |
| LOC113267907 | <a href="#">113267907</a> | 3.896845459 | 1.962307 | 0.000295 | 0.001318 |
| LOC113247923 | <a href="#">113247923</a> | 3.894579431 | 1.961468 | 0.000349 | 0.001527 |
| BLCAP        | <a href="#">113258579</a> | 3.894471648 | 1.961428 | 0.000213 | 0.000988 |
| DMAC1        | <a href="#">113260618</a> | 3.885760421 | 1.958197 | 5E-07    | 4.02E-06 |
| LOC113246288 | <a href="#">113246288</a> | 3.879045538 | 1.955702 | 0.001244 | 0.004663 |
| ADAMTS1      | <a href="#">113269052</a> | 3.876470993 | 1.954744 | 5.07E-06 | 3.42E-05 |
| NFKBIL1      | <a href="#">113243709</a> | 3.872627078 | 1.953313 | 9.84E-07 | 7.52E-06 |
| CRY2         | <a href="#">113264999</a> | 3.867975785 | 1.951579 | 6.19E-06 | 4.1E-05  |
| SOX7         | <a href="#">113269935</a> | 3.85541899  | 1.946888 | 0.000346 | 0.001515 |
| ADGRA3       | <a href="#">113266735</a> | 3.853370354 | 1.946121 | 1.29E-06 | 9.64E-06 |
| ADRA2C       | <a href="#">113245678</a> | 3.850523892 | 1.945055 | 0.00389  | 0.012499 |
| TCHH         | <a href="#">113246136</a> | 3.849282321 | 1.944589 | 0.007877 | 0.022912 |
| ACCSL        | <a href="#">113265013</a> | 3.845553963 | 1.943191 | 0.000644 | 0.002623 |
| CACNA1D      | <a href="#">113256986</a> | 3.844295277 | 1.942719 | 0.00033  | 0.001453 |
| FMO1         | <a href="#">113262844</a> | 3.843777181 | 1.942525 | 0.002975 | 0.009955 |
| LOC113261786 | <a href="#">113261786</a> | 3.83742467  | 1.940138 | 0.000541 | 0.002248 |
| UBE2G1       | <a href="#">113271043</a> | 3.836993523 | 1.939976 | 0.000127 | 0.000618 |
| SLC16A11     | <a href="#">113271101</a> | 3.833046882 | 1.938492 | 0.000871 | 0.003415 |
| BLOC1S1      | <a href="#">113256461</a> | 3.830454079 | 1.937515 | 3.78E-05 | 0.000208 |
| RHOBTB3      | <a href="#">113255075</a> | 3.829117057 | 1.937012 | 2.74E-05 | 0.000156 |
| FILIP1L      | <a href="#">113250483</a> | 3.826354623 | 1.935971 | 5.56E-07 | 4.44E-06 |
| NIM1K        | <a href="#">113260953</a> | 3.825634634 | 1.935699 | 0.00321  | 0.010609 |
| TMEM252      | <a href="#">113270191</a> | 3.824024607 | 1.935092 | 0.003358 | 0.011027 |
| MIB1         | <a href="#">113253275</a> | 3.823556501 | 1.934915 | 1.43E-05 | 8.7E-05  |
| ZNF185       | <a href="#">113246825</a> | 3.821878687 | 1.934282 | 0.006224 | 0.018816 |
| SDHD         | <a href="#">113260049</a> | 3.818504196 | 1.933008 | 0.000135 | 0.000653 |

|              |                           |             |          |          |          |
|--------------|---------------------------|-------------|----------|----------|----------|
| TRAK1        | <a href="#">113253818</a> | 3.814270762 | 1.931407 | 2.07E-05 | 0.000121 |
| CSDE1        | <a href="#">113244393</a> | 3.812466253 | 1.930725 | 0.007437 | 0.021806 |
| NUDT8        | <a href="#">113244016</a> | 3.810721889 | 1.930064 | 0.000197 | 0.000917 |
| RPP40        | <a href="#">113264415</a> | 3.809678004 | 1.929669 | 8.55E-05 | 0.000436 |
| RNF128       | <a href="#">113241221</a> | 3.809557321 | 1.929623 | 0.010747 | 0.029637 |
| TMEM185A     | <a href="#">113241899</a> | 3.808124663 | 1.929081 | 1.26E-07 | 1.14E-06 |
| NDUFV1       | <a href="#">113244014</a> | 3.805938183 | 1.928252 | 9.2E-05  | 0.000464 |
| CST6         | <a href="#">113244082</a> | 3.805647596 | 1.928142 | 0.000113 | 0.000562 |
| MRPL45       | <a href="#">113265550</a> | 3.804602253 | 1.927746 | 1.05E-05 | 6.61E-05 |
| NT5C3A       | <a href="#">113262512</a> | 3.804600039 | 1.927745 | 9.17E-06 | 5.84E-05 |
| MYOC         | <a href="#">113262839</a> | 3.803393309 | 1.927287 | 0.016194 | 0.042128 |
| LOC113248593 | <a href="#">113248593</a> | 3.796438562 | 1.924647 | 6.74E-07 | 5.3E-06  |
| DNAJB1       | <a href="#">113247153</a> | 3.795523186 | 1.924299 | 5.77E-07 | 4.59E-06 |
| LOC113260369 | <a href="#">113260369</a> | 3.79468662  | 1.923981 | 1.12E-05 | 7.02E-05 |
| ADAMTSL2     | <a href="#">113266573</a> | 3.794410633 | 1.923876 | 0.000177 | 0.000838 |
| PREPL        | <a href="#">113246215</a> | 3.793631641 | 1.92358  | 3.1E-07  | 2.59E-06 |
| ATP5MF       | <a href="#">113267913</a> | 3.792405215 | 1.923113 | 2.22E-06 | 1.59E-05 |
| TBRG4        | <a href="#">113257719</a> | 3.784260079 | 1.920011 | 2.91E-05 | 0.000165 |
| GRASP        | <a href="#">113257465</a> | 3.782491444 | 1.919337 | 5.44E-05 | 0.000289 |
| MSI2         | <a href="#">113268852</a> | 3.77986431  | 1.918334 | 3.61E-07 | 2.98E-06 |
| TMEM11       | <a href="#">113271315</a> | 3.779381716 | 1.91815  | 1.14E-06 | 8.62E-06 |
| NDUFAF2      | <a href="#">113255305</a> | 3.775868104 | 1.916808 | 0.000761 | 0.003036 |
| NDUFS6       | <a href="#">113260793</a> | 3.774786582 | 1.916395 | 3.06E-06 | 2.14E-05 |
| GOLGA4       | <a href="#">113253773</a> | 3.770632602 | 1.914807 | 7.78E-05 | 0.0004   |
| CALR3        | <a href="#">113256650</a> | 3.770474155 | 1.914746 | 0.00055  | 0.00228  |
| DEXI         | <a href="#">113270801</a> | 3.767847945 | 1.913741 | 8.17E-07 | 6.34E-06 |
| LOC113246871 | <a href="#">113246871</a> | 3.763990755 | 1.912263 | 2.32E-06 | 1.65E-05 |
| LOC113264253 | <a href="#">113264253</a> | 3.762002117 | 1.911501 | 0.000197 | 0.000917 |

|              |                           |             |          |          |          |
|--------------|---------------------------|-------------|----------|----------|----------|
| TMOD1        | <a href="#">113260426</a> | 3.761371318 | 1.911259 | 0.00014  | 0.000676 |
| VAMP2        | <a href="#">113271170</a> | 3.761354847 | 1.911252 | 3.85E-06 | 2.65E-05 |
| PPM1L        | <a href="#">113254142</a> | 3.758561175 | 1.91018  | 2.06E-05 | 0.00012  |
| NOS3         | <a href="#">113241474</a> | 3.757553192 | 1.909794 | 1.25E-05 | 7.72E-05 |
| DMAC2L       | <a href="#">113266076</a> | 3.75632709  | 1.909323 | 7.66E-05 | 0.000394 |
| REPIN1       | <a href="#">113241464</a> | 3.753905154 | 1.908392 | 1.61E-07 | 1.43E-06 |
| CELF5        | <a href="#">113242796</a> | 3.752849238 | 1.907986 | 0.00181  | 0.006454 |
| EPB41L4B     | <a href="#">113260640</a> | 3.749679863 | 1.906767 | 0.000149 | 0.000715 |
| AMACR        | <a href="#">113260868</a> | 3.748598083 | 1.906351 | 1.66E-05 | 9.9E-05  |
| CUNH3orf18   | <a href="#">113256920</a> | 3.74835387  | 1.906257 | 0.00078  | 0.003101 |
| TMEM184A     | <a href="#">113247730</a> | 3.742373001 | 1.903953 | 0.00104  | 0.003981 |
| IGFALS       | <a href="#">113245094</a> | 3.742304539 | 1.903927 | 1.03E-05 | 6.52E-05 |
| SMIM20       | <a href="#">113266763</a> | 3.740271041 | 1.903143 | 9.98E-06 | 6.31E-05 |
| SBDS         | <a href="#">113267760</a> | 3.740005167 | 1.90304  | 5.13E-06 | 3.45E-05 |
| KCNN3        | <a href="#">113245302</a> | 3.732582874 | 1.900174 | 0.000389 | 0.001682 |
| OXA1L        | <a href="#">113246043</a> | 3.729845145 | 1.899116 | 0.000117 | 0.000576 |
| LCMT1        | <a href="#">113267594</a> | 3.72913362  | 1.89884  | 1.2E-06  | 8.98E-06 |
| SLC4A3       | <a href="#">113250414</a> | 3.728332035 | 1.89853  | 0.000489 | 0.002057 |
| HEYL         | <a href="#">113268247</a> | 3.728261085 | 1.898503 | 5.07E-07 | 4.07E-06 |
| LOC113246846 | <a href="#">113246846</a> | 3.716889029 | 1.894096 | 6.56E-06 | 4.32E-05 |
| LRRC43       | <a href="#">113266928</a> | 3.71688257  | 1.894093 | 0.001059 | 0.004045 |
| TEF          | <a href="#">113241732</a> | 3.714435706 | 1.893143 | 6.57E-06 | 4.32E-05 |
| MALL         | <a href="#">113242244</a> | 3.710609646 | 1.891656 | 0.00064  | 0.002609 |
| MEIOC        | <a href="#">113265676</a> | 3.708354466 | 1.890779 | 0.000312 | 0.001383 |
| TSNARE1      | <a href="#">113247953</a> | 3.700501604 | 1.887721 | 0.000125 | 0.000611 |
| LOC113247922 | <a href="#">113247922</a> | 3.695477365 | 1.885761 | 1.27E-05 | 7.8E-05  |
| POMGNT1      | <a href="#">113254729</a> | 3.692434443 | 1.884572 | 8.11E-06 | 5.22E-05 |
| GYG1         | <a href="#">113254042</a> | 3.691748289 | 1.884304 | 0.000867 | 0.003403 |

|              |                           |             |          |          |          |
|--------------|---------------------------|-------------|----------|----------|----------|
| CUNH6orf106  | <a href="#">113243827</a> | 3.690584246 | 1.883849 | 0.000256 | 0.00116  |
| LOC113242783 | <a href="#">113242783</a> | 3.684791335 | 1.881583 | 0.000235 | 0.001076 |
| LOC113254636 | <a href="#">113254636</a> | 3.681904493 | 1.880452 | 3.77E-06 | 2.6E-05  |
| NDUFA4L2     | <a href="#">113256390</a> | 3.677301083 | 1.878647 | 0.001745 | 0.006249 |
| LOC113247877 | <a href="#">113247877</a> | 3.676961928 | 1.878514 | 0.001742 | 0.006242 |
| POLDIP2      | <a href="#">113269025</a> | 3.676221558 | 1.878224 | 4.13E-06 | 2.82E-05 |
| CDKL5        | <a href="#">113242254</a> | 3.675688127 | 1.878014 | 0.00034  | 0.00149  |
| LOC113241423 | <a href="#">113241423</a> | 3.667294269 | 1.874716 | 0.000627 | 0.00256  |
| ACTR3B       | <a href="#">113241507</a> | 3.657492366 | 1.870855 | 1.11E-06 | 8.39E-06 |
| EEF1D        | <a href="#">113247655</a> | 3.65569526  | 1.870146 | 0.001422 | 0.005241 |
| RASD2        | <a href="#">113256004</a> | 3.653705827 | 1.86936  | 0.001031 | 0.003954 |
| CATSPERD     | <a href="#">113242861</a> | 3.65150505  | 1.868491 | 0.001273 | 0.004759 |
| ATPAF1       | <a href="#">113254713</a> | 3.650832753 | 1.868226 | 1.08E-06 | 8.19E-06 |
| SPOCK2       | <a href="#">113259155</a> | 3.650575148 | 1.868124 | 2.17E-05 | 0.000126 |
| ROMO1        | <a href="#">113258545</a> | 3.65005854  | 1.86792  | 4.67E-06 | 3.17E-05 |
| ZMAT5        | <a href="#">113245019</a> | 3.645539942 | 1.866133 | 2.27E-05 | 0.000131 |
| INSYN1       | <a href="#">113240951</a> | 3.644654032 | 1.865782 | 0.003466 | 0.011343 |
| LRRTM2       | <a href="#">113261797</a> | 3.644102694 | 1.865564 | 0.002992 | 0.009998 |
| DCAF6        | <a href="#">113262875</a> | 3.634561826 | 1.861781 | 0.000659 | 0.002677 |
| CUNH9orf16   | <a href="#">113266457</a> | 3.63428294  | 1.861671 | 3.14E-05 | 0.000175 |
| ZNF391       | <a href="#">113264258</a> | 3.632274446 | 1.860873 | 2.25E-05 | 0.00013  |
| CCDC136      | <a href="#">113263909</a> | 3.631012608 | 1.860372 | 4.25E-05 | 0.00023  |
| ZYG11B       | <a href="#">113254661</a> | 3.626846199 | 1.858716 | 4E-05    | 0.000218 |
| MRPL21       | <a href="#">113243993</a> | 3.615653444 | 1.854256 | 8.04E-06 | 5.18E-05 |
| RAPGEF1      | <a href="#">113266537</a> | 3.614830168 | 1.853928 | 1.72E-05 | 0.000103 |
| FASTK        | <a href="#">113241480</a> | 3.611712036 | 1.852683 | 7.63E-06 | 4.95E-05 |
| NOX4         | <a href="#">113269421</a> | 3.61000922  | 1.852003 | 0.002226 | 0.007732 |
| LOC113247021 | <a href="#">113247021</a> | 3.606306538 | 1.850522 | 0.001393 | 0.005149 |

|              |                           |             |          |          |          |
|--------------|---------------------------|-------------|----------|----------|----------|
| YPEL2        | <a href="#">113268888</a> | 3.605804345 | 1.850321 | 2.2E-05  | 0.000128 |
| AVPI1        | <a href="#">113251796</a> | 3.603725364 | 1.849489 | 0.000616 | 0.002525 |
| PLEKHH3      | <a href="#">113265409</a> | 3.603014788 | 1.849205 | 3.91E-06 | 2.69E-05 |
| EML1         | <a href="#">113267272</a> | 3.601332967 | 1.848531 | 0.000235 | 0.001077 |
| PIH1D1       | <a href="#">113243302</a> | 3.599848866 | 1.847936 | 2.04E-06 | 1.47E-05 |
| CGNL1        | <a href="#">113269670</a> | 3.59961167  | 1.847841 | 2.86E-05 | 0.000162 |
| ANO5         | <a href="#">113265108</a> | 3.598247884 | 1.847295 | 0.006651 | 0.019871 |
| GMPS         | <a href="#">113254098</a> | 3.593739088 | 1.845486 | 0.000134 | 0.000651 |
| SLC7A6OS     | <a href="#">113252408</a> | 3.592077977 | 1.844819 | 1.13E-05 | 7.03E-05 |
| CCDC43       | <a href="#">113265348</a> | 3.99904936  | 1.999657 | 2.42E-07 | 2.07E-06 |
| GPR21        | <a href="#">113266387</a> | 3.998009682 | 1.999282 | 0.000501 | 0.002103 |
| FBXO31       | <a href="#">113252169</a> | 3.997940902 | 1.999257 | 2.87E-05 | 0.000162 |
| TTC33        | <a href="#">113260928</a> | 3.997247036 | 1.999007 | 9.87E-07 | 7.53E-06 |
| CAMK2G       | <a href="#">113259192</a> | 3.996334056 | 1.998677 | 3.96E-05 | 0.000216 |
| DMD          | <a href="#">113265965</a> | 3.993562762 | 1.997676 | 5.4E-05  | 0.000287 |
| ZNF770       | <a href="#">113242069</a> | 3.993032363 | 1.997485 | 3.71E-07 | 3.05E-06 |
| HMGN3        | <a href="#">113261087</a> | 3.992598334 | 1.997328 | 4.32E-07 | 3.53E-06 |
| LOC113247902 | <a href="#">113247902</a> | 3.989548809 | 1.996226 | 0.000607 | 0.002491 |
| CHRNA1       | <a href="#">113250753</a> | 3.988745087 | 1.995935 | 0.000228 | 0.001045 |
| COQ7         | <a href="#">113270738</a> | 3.988084658 | 1.995696 | 3.95E-06 | 2.72E-05 |
| SLC25A20     | <a href="#">113256849</a> | 3.987713349 | 1.995562 | 1.35E-05 | 8.27E-05 |
| LZTS3        | <a href="#">113258399</a> | 3.985565032 | 1.994784 | 8.66E-05 | 0.000441 |
| IDH3B        | <a href="#">113258411</a> | 3.982968404 | 1.993844 | 5.09E-05 | 0.000273 |
| TWF2         | <a href="#">113256944</a> | 3.975715508 | 1.991215 | 7E-05    | 0.000364 |
| IGDCC4       | <a href="#">113241013</a> | 3.97353948  | 1.990425 | 2.47E-07 | 2.11E-06 |
| PDLIM7       | <a href="#">113264157</a> | 3.970432078 | 1.989296 | 6.55E-07 | 5.17E-06 |
| NDUFAF5      | <a href="#">113258328</a> | 3.96883445  | 1.988715 | 2.75E-05 | 0.000156 |
| HOXC9        | <a href="#">113257530</a> | 3.956446757 | 1.984205 | 0.002072 | 0.007251 |

|              |                           |             |          |          |          |
|--------------|---------------------------|-------------|----------|----------|----------|
| LOC113246178 | <a href="#">113246178</a> | 3.952464885 | 1.982753 | 1.64E-07 | 1.46E-06 |
| ISYNA1       | <a href="#">113256718</a> | 3.950539913 | 1.98205  | 7.59E-05 | 0.000391 |
| LOC113254727 | <a href="#">113254727</a> | 3.950483699 | 1.982029 | 0.000105 | 0.000525 |
| ATF3         | <a href="#">113262677</a> | 3.950300408 | 1.981962 | 3.97E-05 | 0.000217 |
| LOC113243815 | <a href="#">113243815</a> | 3.946587306 | 1.980606 | 2.02E-06 | 1.46E-05 |
| HADHB        | <a href="#">113270781</a> | 3.942160329 | 1.978986 | 0.000617 | 0.002527 |
| EIF4EBP1     | <a href="#">113262099</a> | 3.941308331 | 1.978675 | 5.23E-06 | 3.51E-05 |
| DEPTOR       | <a href="#">113252772</a> | 3.939841863 | 1.978138 | 5.72E-06 | 3.81E-05 |
| LOC113248580 | <a href="#">113248580</a> | 3.930596699 | 1.974748 | 1.38E-05 | 8.43E-05 |
| ZNF503       | <a href="#">113259209</a> | 3.928341924 | 1.973921 | 5.47E-07 | 4.37E-06 |
| KIF26A       | <a href="#">113267199</a> | 3.927020843 | 1.973435 | 1.74E-05 | 0.000104 |
| LOC113246863 | <a href="#">113246863</a> | 3.926702902 | 1.973318 | 0.001765 | 0.006308 |
| TRMT2B       | <a href="#">113244297</a> | 3.924733079 | 1.972595 | 0.000265 | 0.001197 |
| PFDN1        | <a href="#">113261816</a> | 3.922935319 | 1.971934 | 3.73E-07 | 3.07E-06 |
| COQ5         | <a href="#">113267040</a> | 3.921745646 | 1.971496 | 7.52E-07 | 5.86E-06 |
| TTC19        | <a href="#">113271258</a> | 3.915333658 | 1.969135 | 3.47E-07 | 2.88E-06 |
| ZSCAN9       | <a href="#">113248163</a> | 3.911955053 | 1.96789  | 0.000313 | 0.001388 |
| RASSF4       | <a href="#">113243126</a> | 3.906260256 | 1.965788 | 4.1E-06  | 2.81E-05 |
| NDUFB2       | <a href="#">113265140</a> | 3.903614752 | 1.964811 | 7.65E-06 | 4.96E-05 |
| LOC113259016 | <a href="#">113259016</a> | 3.900719432 | 1.96374  | 6.57E-06 | 4.32E-05 |
| INPP5E       | <a href="#">113248636</a> | 3.897670056 | 1.962612 | 4.61E-05 | 0.000248 |
| LOC113267907 | <a href="#">113267907</a> | 3.896845459 | 1.962307 | 0.000295 | 0.001318 |
| LOC113247923 | <a href="#">113247923</a> | 3.894579431 | 1.961468 | 0.000349 | 0.001527 |
| BLCAP        | <a href="#">113258579</a> | 3.894471648 | 1.961428 | 0.000213 | 0.000988 |
| DMAC1        | <a href="#">113260618</a> | 3.885760421 | 1.958197 | 5E-07    | 4.02E-06 |
| LOC113246288 | <a href="#">113246288</a> | 3.879045538 | 1.955702 | 0.001244 | 0.004663 |
| ADAMTS1      | <a href="#">113269052</a> | 3.876470993 | 1.954744 | 5.07E-06 | 3.42E-05 |
| NFKBIL1      | <a href="#">113243709</a> | 3.872627078 | 1.953313 | 9.84E-07 | 7.52E-06 |

|              |                           |             |          |          |          |
|--------------|---------------------------|-------------|----------|----------|----------|
| CRY2         | <a href="#">113264999</a> | 3.867975785 | 1.951579 | 6.19E-06 | 4.1E-05  |
| SOX7         | <a href="#">113269935</a> | 3.85541899  | 1.946888 | 0.000346 | 0.001515 |
| ADGRA3       | <a href="#">113266735</a> | 3.853370354 | 1.946121 | 1.29E-06 | 9.64E-06 |
| ADRA2C       | <a href="#">113245678</a> | 3.850523892 | 1.945055 | 0.00389  | 0.012499 |
| TCHH         | <a href="#">113246136</a> | 3.849282321 | 1.944589 | 0.007877 | 0.022912 |
| ACCSL        | <a href="#">113265013</a> | 3.845553963 | 1.943191 | 0.000644 | 0.002623 |
| CACNA1D      | <a href="#">113256986</a> | 3.844295277 | 1.942719 | 0.00033  | 0.001453 |
| FMO1         | <a href="#">113262844</a> | 3.843777181 | 1.942525 | 0.002975 | 0.009955 |
| LOC113261786 | <a href="#">113261786</a> | 3.83742467  | 1.940138 | 0.000541 | 0.002248 |
| UBE2G1       | <a href="#">113271043</a> | 3.836993523 | 1.939976 | 0.000127 | 0.000618 |
| SLC16A11     | <a href="#">113271101</a> | 3.833046882 | 1.938492 | 0.000871 | 0.003415 |
| BLOC1S1      | <a href="#">113256461</a> | 3.830454079 | 1.937515 | 3.78E-05 | 0.000208 |
| RHOBTB3      | <a href="#">113255075</a> | 3.829117057 | 1.937012 | 2.74E-05 | 0.000156 |
| FILIP1L      | <a href="#">113250483</a> | 3.826354623 | 1.935971 | 5.56E-07 | 4.44E-06 |
| NIM1K        | <a href="#">113260953</a> | 3.825634634 | 1.935699 | 0.00321  | 0.010609 |
| TMEM252      | <a href="#">113270191</a> | 3.824024607 | 1.935092 | 0.003358 | 0.011027 |
| MIB1         | <a href="#">113253275</a> | 3.823556501 | 1.934915 | 1.43E-05 | 8.7E-05  |
| ZNF185       | <a href="#">113246825</a> | 3.821878687 | 1.934282 | 0.006224 | 0.018816 |
| SDHD         | <a href="#">113260049</a> | 3.818504196 | 1.933008 | 0.000135 | 0.000653 |
| TRAK1        | <a href="#">113253818</a> | 3.814270762 | 1.931407 | 2.07E-05 | 0.000121 |
| CSDE1        | <a href="#">113244393</a> | 3.812466253 | 1.930725 | 0.007437 | 0.021806 |
| NUDT8        | <a href="#">113244016</a> | 3.810721889 | 1.930064 | 0.000197 | 0.000917 |
| RPP40        | <a href="#">113264415</a> | 3.809678004 | 1.929669 | 8.55E-05 | 0.000436 |
| RNF128       | <a href="#">113241221</a> | 3.809557321 | 1.929623 | 0.010747 | 0.029637 |
| TMEM185A     | <a href="#">113241899</a> | 3.808124663 | 1.929081 | 1.26E-07 | 1.14E-06 |
| NDUFV1       | <a href="#">113244014</a> | 3.805938183 | 1.928252 | 9.2E-05  | 0.000464 |
| CST6         | <a href="#">113244082</a> | 3.805647596 | 1.928142 | 0.000113 | 0.000562 |
| MRPL45       | <a href="#">113265550</a> | 3.804602253 | 1.927746 | 1.05E-05 | 6.61E-05 |

|              |                           |             |          |          |          |
|--------------|---------------------------|-------------|----------|----------|----------|
| NT5C3A       | <a href="#">113262512</a> | 3.804600039 | 1.927745 | 9.17E-06 | 5.84E-05 |
| MYOC         | <a href="#">113262839</a> | 3.803393309 | 1.927287 | 0.016194 | 0.042128 |
| LOC113248593 | <a href="#">113248593</a> | 3.796438562 | 1.924647 | 6.74E-07 | 5.3E-06  |
| DNAJB1       | <a href="#">113247153</a> | 3.795523186 | 1.924299 | 5.77E-07 | 4.59E-06 |
| LOC113260369 | <a href="#">113260369</a> | 3.79468662  | 1.923981 | 1.12E-05 | 7.02E-05 |
| ADAMTSL2     | <a href="#">113266573</a> | 3.794410633 | 1.923876 | 0.000177 | 0.000838 |
| PREPL        | <a href="#">113246215</a> | 3.793631641 | 1.92358  | 3.1E-07  | 2.59E-06 |
| ATP5MF       | <a href="#">113267913</a> | 3.792405215 | 1.923113 | 2.22E-06 | 1.59E-05 |
| TBRG4        | <a href="#">113257719</a> | 3.784260079 | 1.920011 | 2.91E-05 | 0.000165 |
| GRASP        | <a href="#">113257465</a> | 3.782491444 | 1.919337 | 5.44E-05 | 0.000289 |
| MSI2         | <a href="#">113268852</a> | 3.77986431  | 1.918334 | 3.61E-07 | 2.98E-06 |
| TMEM11       | <a href="#">113271315</a> | 3.779381716 | 1.91815  | 1.14E-06 | 8.62E-06 |
| NDUFAF2      | <a href="#">113255305</a> | 3.775868104 | 1.916808 | 0.000761 | 0.003036 |
| NDUFS6       | <a href="#">113260793</a> | 3.774786582 | 1.916395 | 3.06E-06 | 2.14E-05 |
| GOLGA4       | <a href="#">113253773</a> | 3.770632602 | 1.914807 | 7.78E-05 | 0.0004   |
| CALR3        | <a href="#">113256650</a> | 3.770474155 | 1.914746 | 0.00055  | 0.00228  |
| DEXI         | <a href="#">113270801</a> | 3.767847945 | 1.913741 | 8.17E-07 | 6.34E-06 |
| LOC113246871 | <a href="#">113246871</a> | 3.763990755 | 1.912263 | 2.32E-06 | 1.65E-05 |
| LOC113264253 | <a href="#">113264253</a> | 3.762002117 | 1.911501 | 0.000197 | 0.000917 |
| TMOD1        | <a href="#">113260426</a> | 3.761371318 | 1.911259 | 0.00014  | 0.000676 |
| VAMP2        | <a href="#">113271170</a> | 3.761354847 | 1.911252 | 3.85E-06 | 2.65E-05 |
| PPM1L        | <a href="#">113254142</a> | 3.758561175 | 1.91018  | 2.06E-05 | 0.00012  |
| NOS3         | <a href="#">113241474</a> | 3.757553192 | 1.909794 | 1.25E-05 | 7.72E-05 |
| DMAC2L       | <a href="#">113266076</a> | 3.75632709  | 1.909323 | 7.66E-05 | 0.000394 |
| REPIN1       | <a href="#">113241464</a> | 3.753905154 | 1.908392 | 1.61E-07 | 1.43E-06 |
| CELF5        | <a href="#">113242796</a> | 3.752849238 | 1.907986 | 0.00181  | 0.006454 |
| EPB41L4B     | <a href="#">113260640</a> | 3.749679863 | 1.906767 | 0.000149 | 0.000715 |
| AMACR        | <a href="#">113260868</a> | 3.748598083 | 1.906351 | 1.66E-05 | 9.9E-05  |

|              |                           |             |          |          |          |
|--------------|---------------------------|-------------|----------|----------|----------|
| CUNH3orf18   | <a href="#">113256920</a> | 3.74835387  | 1.906257 | 0.00078  | 0.003101 |
| TMEM184A     | <a href="#">113247730</a> | 3.742373001 | 1.903953 | 0.00104  | 0.003981 |
| IGFALS       | <a href="#">113245094</a> | 3.742304539 | 1.903927 | 1.03E-05 | 6.52E-05 |
| SMIM20       | <a href="#">113266763</a> | 3.740271041 | 1.903143 | 9.98E-06 | 6.31E-05 |
| SBDS         | <a href="#">113267760</a> | 3.740005167 | 1.90304  | 5.13E-06 | 3.45E-05 |
| KCNN3        | <a href="#">113245302</a> | 3.732582874 | 1.900174 | 0.000389 | 0.001682 |
| OXA1L        | <a href="#">113246043</a> | 3.729845145 | 1.899116 | 0.000117 | 0.000576 |
| LCMT1        | <a href="#">113267594</a> | 3.72913362  | 1.89884  | 1.2E-06  | 8.98E-06 |
| SLC4A3       | <a href="#">113250414</a> | 3.728332035 | 1.89853  | 0.000489 | 0.002057 |
| HEYL         | <a href="#">113268247</a> | 3.728261085 | 1.898503 | 5.07E-07 | 4.07E-06 |
| LOC113246846 | <a href="#">113246846</a> | 3.716889029 | 1.894096 | 6.56E-06 | 4.32E-05 |
| LRRC43       | <a href="#">113266928</a> | 3.71688257  | 1.894093 | 0.001059 | 0.004045 |
| TEF          | <a href="#">113241732</a> | 3.714435706 | 1.893143 | 6.57E-06 | 4.32E-05 |
| MALL         | <a href="#">113242244</a> | 3.710609646 | 1.891656 | 0.00064  | 0.002609 |
| MEIOC        | <a href="#">113265676</a> | 3.708354466 | 1.890779 | 0.000312 | 0.001383 |
| TSNARE1      | <a href="#">113247953</a> | 3.700501604 | 1.887721 | 0.000125 | 0.000611 |
| LOC113247922 | <a href="#">113247922</a> | 3.695477365 | 1.885761 | 1.27E-05 | 7.8E-05  |
| POMGNT1      | <a href="#">113254729</a> | 3.692434443 | 1.884572 | 8.11E-06 | 5.22E-05 |
| GYG1         | <a href="#">113254042</a> | 3.691748289 | 1.884304 | 0.000867 | 0.003403 |
| CUNH6orf106  | <a href="#">113243827</a> | 3.690584246 | 1.883849 | 0.000256 | 0.00116  |
| LOC113242783 | <a href="#">113242783</a> | 3.684791335 | 1.881583 | 0.000235 | 0.001076 |
| LOC113254636 | <a href="#">113254636</a> | 3.681904493 | 1.880452 | 3.77E-06 | 2.6E-05  |
| NDUFA4L2     | <a href="#">113256390</a> | 3.677301083 | 1.878647 | 0.001745 | 0.006249 |
| LOC113247877 | <a href="#">113247877</a> | 3.676961928 | 1.878514 | 0.001742 | 0.006242 |
| POLDIP2      | <a href="#">113269025</a> | 3.676221558 | 1.878224 | 4.13E-06 | 2.82E-05 |
| CDKL5        | <a href="#">113242254</a> | 3.675688127 | 1.878014 | 0.00034  | 0.00149  |
| LOC113241423 | <a href="#">113241423</a> | 3.667294269 | 1.874716 | 0.000627 | 0.00256  |
| ACTR3B       | <a href="#">113241507</a> | 3.657492366 | 1.870855 | 1.11E-06 | 8.39E-06 |

|              |                           |             |          |          |          |
|--------------|---------------------------|-------------|----------|----------|----------|
| EEF1D        | <a href="#">113247655</a> | 3.65569526  | 1.870146 | 0.001422 | 0.005241 |
| RASD2        | <a href="#">113256004</a> | 3.653705827 | 1.86936  | 0.001031 | 0.003954 |
| CATSPERD     | <a href="#">113242861</a> | 3.65150505  | 1.868491 | 0.001273 | 0.004759 |
| ATPAF1       | <a href="#">113254713</a> | 3.650832753 | 1.868226 | 1.08E-06 | 8.19E-06 |
| SPOCK2       | <a href="#">113259155</a> | 3.650575148 | 1.868124 | 2.17E-05 | 0.000126 |
| ROMO1        | <a href="#">113258545</a> | 3.65005854  | 1.86792  | 4.67E-06 | 3.17E-05 |
| ZMAT5        | <a href="#">113245019</a> | 3.645539942 | 1.866133 | 2.27E-05 | 0.000131 |
| INSYN1       | <a href="#">113240951</a> | 3.644654032 | 1.865782 | 0.003466 | 0.011343 |
| LRRTM2       | <a href="#">113261797</a> | 3.644102694 | 1.865564 | 0.002992 | 0.009998 |
| DCAF6        | <a href="#">113262875</a> | 3.634561826 | 1.861781 | 0.000659 | 0.002677 |
| CUNH9orf16   | <a href="#">113266457</a> | 3.63428294  | 1.861671 | 3.14E-05 | 0.000175 |
| ZNF391       | <a href="#">113264258</a> | 3.632274446 | 1.860873 | 2.25E-05 | 0.00013  |
| CCDC136      | <a href="#">113263909</a> | 3.631012608 | 1.860372 | 4.25E-05 | 0.00023  |
| ZYG11B       | <a href="#">113254661</a> | 3.626846199 | 1.858716 | 4E-05    | 0.000218 |
| MRPL21       | <a href="#">113243993</a> | 3.615653444 | 1.854256 | 8.04E-06 | 5.18E-05 |
| RAPGEF1      | <a href="#">113266537</a> | 3.614830168 | 1.853928 | 1.72E-05 | 0.000103 |
| FASTK        | <a href="#">113241480</a> | 3.611712036 | 1.852683 | 7.63E-06 | 4.95E-05 |
| NOX4         | <a href="#">113269421</a> | 3.61000922  | 1.852003 | 0.002226 | 0.007732 |
| LOC113247021 | <a href="#">113247021</a> | 3.606306538 | 1.850522 | 0.001393 | 0.005149 |
| YPEL2        | <a href="#">113268888</a> | 3.605804345 | 1.850321 | 2.2E-05  | 0.000128 |
| AVPI1        | <a href="#">113251796</a> | 3.603725364 | 1.849489 | 0.000616 | 0.002525 |
| PLEKHH3      | <a href="#">113265409</a> | 3.603014788 | 1.849205 | 3.91E-06 | 2.69E-05 |
| EML1         | <a href="#">113267272</a> | 3.601332967 | 1.848531 | 0.000235 | 0.001077 |
| PIH1D1       | <a href="#">113243302</a> | 3.599848866 | 1.847936 | 2.04E-06 | 1.47E-05 |
| CGNL1        | <a href="#">113269670</a> | 3.59961167  | 1.847841 | 2.86E-05 | 0.000162 |
| ANO5         | <a href="#">113265108</a> | 3.598247884 | 1.847295 | 0.006651 | 0.019871 |
| GMPS         | <a href="#">113254098</a> | 3.593739088 | 1.845486 | 0.000134 | 0.000651 |
| SLC7A6OS     | <a href="#">113252408</a> | 3.592077977 | 1.844819 | 1.13E-05 | 7.03E-05 |

|              |                           |             |          |          |          |
|--------------|---------------------------|-------------|----------|----------|----------|
| CCDC43       | <a href="#">113265348</a> | 3.99904936  | 1.999657 | 2.42E-07 | 2.07E-06 |
| GPR21        | <a href="#">113266387</a> | 3.998009682 | 1.999282 | 0.000501 | 0.002103 |
| FBXO31       | <a href="#">113252169</a> | 3.997940902 | 1.999257 | 2.87E-05 | 0.000162 |
| TTC33        | <a href="#">113260928</a> | 3.997247036 | 1.999007 | 9.87E-07 | 7.53E-06 |
| CAMK2G       | <a href="#">113259192</a> | 3.996334056 | 1.998677 | 3.96E-05 | 0.000216 |
| DMD          | <a href="#">113265965</a> | 3.993562762 | 1.997676 | 5.4E-05  | 0.000287 |
| ZNF770       | <a href="#">113242069</a> | 3.993032363 | 1.997485 | 3.71E-07 | 3.05E-06 |
| HMGN3        | <a href="#">113261087</a> | 3.992598334 | 1.997328 | 4.32E-07 | 3.53E-06 |
| LOC113247902 | <a href="#">113247902</a> | 3.989548809 | 1.996226 | 0.000607 | 0.002491 |
| CHRNA1       | <a href="#">113250753</a> | 3.988745087 | 1.995935 | 0.000228 | 0.001045 |
| COQ7         | <a href="#">113270738</a> | 3.988084658 | 1.995696 | 3.95E-06 | 2.72E-05 |
| SLC25A20     | <a href="#">113256849</a> | 3.987713349 | 1.995562 | 1.35E-05 | 8.27E-05 |
| LZTS3        | <a href="#">113258399</a> | 3.985565032 | 1.994784 | 8.66E-05 | 0.000441 |
| IDH3B        | <a href="#">113258411</a> | 3.982968404 | 1.993844 | 5.09E-05 | 0.000273 |
| TWF2         | <a href="#">113256944</a> | 3.975715508 | 1.991215 | 7E-05    | 0.000364 |
| IGDCC4       | <a href="#">113241013</a> | 3.97353948  | 1.990425 | 2.47E-07 | 2.11E-06 |
| PDLIM7       | <a href="#">113264157</a> | 3.970432078 | 1.989296 | 6.55E-07 | 5.17E-06 |
| NDUFAF5      | <a href="#">113258328</a> | 3.96883445  | 1.988715 | 2.75E-05 | 0.000156 |
| HOXC9        | <a href="#">113257530</a> | 3.956446757 | 1.984205 | 0.002072 | 0.007251 |
| LOC113246178 | <a href="#">113246178</a> | 3.952464885 | 1.982753 | 1.64E-07 | 1.46E-06 |
| ISYNA1       | <a href="#">113256718</a> | 3.950539913 | 1.98205  | 7.59E-05 | 0.000391 |
| LOC113254727 | <a href="#">113254727</a> | 3.950483699 | 1.982029 | 0.000105 | 0.000525 |
| ATF3         | <a href="#">113262677</a> | 3.950300408 | 1.981962 | 3.97E-05 | 0.000217 |
| LOC113243815 | <a href="#">113243815</a> | 3.946587306 | 1.980606 | 2.02E-06 | 1.46E-05 |
| HADHB        | <a href="#">113270781</a> | 3.942160329 | 1.978986 | 0.000617 | 0.002527 |
| EIF4EBP1     | <a href="#">113262099</a> | 3.941308331 | 1.978675 | 5.23E-06 | 3.51E-05 |
| DEPTOR       | <a href="#">113252772</a> | 3.939841863 | 1.978138 | 5.72E-06 | 3.81E-05 |
| LOC113248580 | <a href="#">113248580</a> | 3.930596699 | 1.974748 | 1.38E-05 | 8.43E-05 |

|              |                           |             |          |          |          |
|--------------|---------------------------|-------------|----------|----------|----------|
| ZNF503       | <a href="#">113259209</a> | 3.928341924 | 1.973921 | 5.47E-07 | 4.37E-06 |
| KIF26A       | <a href="#">113267199</a> | 3.927020843 | 1.973435 | 1.74E-05 | 0.000104 |
| LOC113246863 | <a href="#">113246863</a> | 3.926702902 | 1.973318 | 0.001765 | 0.006308 |
| TRMT2B       | <a href="#">113244297</a> | 3.924733079 | 1.972595 | 0.000265 | 0.001197 |
| PFDN1        | <a href="#">113261816</a> | 3.922935319 | 1.971934 | 3.73E-07 | 3.07E-06 |
| COQ5         | <a href="#">113267040</a> | 3.921745646 | 1.971496 | 7.52E-07 | 5.86E-06 |
| TTC19        | <a href="#">113271258</a> | 3.915333658 | 1.969135 | 3.47E-07 | 2.88E-06 |
| ZSCAN9       | <a href="#">113248163</a> | 3.911955053 | 1.96789  | 0.000313 | 0.001388 |
| RASSF4       | <a href="#">113243126</a> | 3.906260256 | 1.965788 | 4.1E-06  | 2.81E-05 |
| NDUFB2       | <a href="#">113265140</a> | 3.903614752 | 1.964811 | 7.65E-06 | 4.96E-05 |
| LOC113259016 | <a href="#">113259016</a> | 3.900719432 | 1.96374  | 6.57E-06 | 4.32E-05 |
| INPP5E       | <a href="#">113248636</a> | 3.897670056 | 1.962612 | 4.61E-05 | 0.000248 |
| LOC113267907 | <a href="#">113267907</a> | 3.896845459 | 1.962307 | 0.000295 | 0.001318 |
| LOC113247923 | <a href="#">113247923</a> | 3.894579431 | 1.961468 | 0.000349 | 0.001527 |
| BLCAP        | <a href="#">113258579</a> | 3.894471648 | 1.961428 | 0.000213 | 0.000988 |
| DMAC1        | <a href="#">113260618</a> | 3.885760421 | 1.958197 | 5E-07    | 4.02E-06 |
| LOC113246288 | <a href="#">113246288</a> | 3.879045538 | 1.955702 | 0.001244 | 0.004663 |
| ADAMTS1      | <a href="#">113269052</a> | 3.876470993 | 1.954744 | 5.07E-06 | 3.42E-05 |
| NFKBIL1      | <a href="#">113243709</a> | 3.872627078 | 1.953313 | 9.84E-07 | 7.52E-06 |
| CRY2         | <a href="#">113264999</a> | 3.867975785 | 1.951579 | 6.19E-06 | 4.1E-05  |
| SOX7         | <a href="#">113269935</a> | 3.85541899  | 1.946888 | 0.000346 | 0.001515 |
| ADGRA3       | <a href="#">113266735</a> | 3.853370354 | 1.946121 | 1.29E-06 | 9.64E-06 |
| ADRA2C       | <a href="#">113245678</a> | 3.850523892 | 1.945055 | 0.00389  | 0.012499 |
| TCHH         | <a href="#">113246136</a> | 3.849282321 | 1.944589 | 0.007877 | 0.022912 |
| ACCSL        | <a href="#">113265013</a> | 3.845553963 | 1.943191 | 0.000644 | 0.002623 |
| CACNA1D      | <a href="#">113256986</a> | 3.844295277 | 1.942719 | 0.00033  | 0.001453 |
| FMO1         | <a href="#">113262844</a> | 3.843777181 | 1.942525 | 0.002975 | 0.009955 |
| LOC113261786 | <a href="#">113261786</a> | 3.83742467  | 1.940138 | 0.000541 | 0.002248 |

|              |                           |             |          |          |          |
|--------------|---------------------------|-------------|----------|----------|----------|
| UBE2G1       | <a href="#">113271043</a> | 3.836993523 | 1.939976 | 0.000127 | 0.000618 |
| SLC16A11     | <a href="#">113271101</a> | 3.833046882 | 1.938492 | 0.000871 | 0.003415 |
| BLOC1S1      | <a href="#">113256461</a> | 3.830454079 | 1.937515 | 3.78E-05 | 0.000208 |
| RHOBTB3      | <a href="#">113255075</a> | 3.829117057 | 1.937012 | 2.74E-05 | 0.000156 |
| FILIP1L      | <a href="#">113250483</a> | 3.826354623 | 1.935971 | 5.56E-07 | 4.44E-06 |
| NIM1K        | <a href="#">113260953</a> | 3.825634634 | 1.935699 | 0.00321  | 0.010609 |
| TMEM252      | <a href="#">113270191</a> | 3.824024607 | 1.935092 | 0.003358 | 0.011027 |
| MIB1         | <a href="#">113253275</a> | 3.823556501 | 1.934915 | 1.43E-05 | 8.7E-05  |
| ZNF185       | <a href="#">113246825</a> | 3.821878687 | 1.934282 | 0.006224 | 0.018816 |
| SDHD         | <a href="#">113260049</a> | 3.818504196 | 1.933008 | 0.000135 | 0.000653 |
| TRAK1        | <a href="#">113253818</a> | 3.814270762 | 1.931407 | 2.07E-05 | 0.000121 |
| CSDE1        | <a href="#">113244393</a> | 3.812466253 | 1.930725 | 0.007437 | 0.021806 |
| NUDT8        | <a href="#">113244016</a> | 3.810721889 | 1.930064 | 0.000197 | 0.000917 |
| RPP40        | <a href="#">113264415</a> | 3.809678004 | 1.929669 | 8.55E-05 | 0.000436 |
| RNF128       | <a href="#">113241221</a> | 3.809557321 | 1.929623 | 0.010747 | 0.029637 |
| TMEM185A     | <a href="#">113241899</a> | 3.808124663 | 1.929081 | 1.26E-07 | 1.14E-06 |
| NDUFV1       | <a href="#">113244014</a> | 3.805938183 | 1.928252 | 9.2E-05  | 0.000464 |
| CST6         | <a href="#">113244082</a> | 3.805647596 | 1.928142 | 0.000113 | 0.000562 |
| MRPL45       | <a href="#">113265550</a> | 3.804602253 | 1.927746 | 1.05E-05 | 6.61E-05 |
| NT5C3A       | <a href="#">113262512</a> | 3.804600039 | 1.927745 | 9.17E-06 | 5.84E-05 |
| MYOC         | <a href="#">113262839</a> | 3.803393309 | 1.927287 | 0.016194 | 0.042128 |
| LOC113248593 | <a href="#">113248593</a> | 3.796438562 | 1.924647 | 6.74E-07 | 5.3E-06  |
| DNAJB1       | <a href="#">113247153</a> | 3.795523186 | 1.924299 | 5.77E-07 | 4.59E-06 |
| LOC113260369 | <a href="#">113260369</a> | 3.79468662  | 1.923981 | 1.12E-05 | 7.02E-05 |
| ADAMTSL2     | <a href="#">113266573</a> | 3.794410633 | 1.923876 | 0.000177 | 0.000838 |
| PREPL        | <a href="#">113246215</a> | 3.793631641 | 1.92358  | 3.1E-07  | 2.59E-06 |
| ATP5MF       | <a href="#">113267913</a> | 3.792405215 | 1.923113 | 2.22E-06 | 1.59E-05 |
| TBRG4        | <a href="#">113257719</a> | 3.784260079 | 1.920011 | 2.91E-05 | 0.000165 |

|              |                           |             |          |          |          |
|--------------|---------------------------|-------------|----------|----------|----------|
| GRASP        | <a href="#">113257465</a> | 3.782491444 | 1.919337 | 5.44E-05 | 0.000289 |
| MSI2         | <a href="#">113268852</a> | 3.77986431  | 1.918334 | 3.61E-07 | 2.98E-06 |
| TMEM11       | <a href="#">113271315</a> | 3.779381716 | 1.91815  | 1.14E-06 | 8.62E-06 |
| NDUFAF2      | <a href="#">113255305</a> | 3.775868104 | 1.916808 | 0.000761 | 0.003036 |
| NDUFS6       | <a href="#">113260793</a> | 3.774786582 | 1.916395 | 3.06E-06 | 2.14E-05 |
| GOLGA4       | <a href="#">113253773</a> | 3.770632602 | 1.914807 | 7.78E-05 | 0.0004   |
| CALR3        | <a href="#">113256650</a> | 3.770474155 | 1.914746 | 0.00055  | 0.00228  |
| DEXI         | <a href="#">113270801</a> | 3.767847945 | 1.913741 | 8.17E-07 | 6.34E-06 |
| LOC113246871 | <a href="#">113246871</a> | 3.763990755 | 1.912263 | 2.32E-06 | 1.65E-05 |
| LOC113264253 | <a href="#">113264253</a> | 3.762002117 | 1.911501 | 0.000197 | 0.000917 |
| TMOD1        | <a href="#">113260426</a> | 3.761371318 | 1.911259 | 0.00014  | 0.000676 |
| VAMP2        | <a href="#">113271170</a> | 3.761354847 | 1.911252 | 3.85E-06 | 2.65E-05 |
| PPM1L        | <a href="#">113254142</a> | 3.758561175 | 1.91018  | 2.06E-05 | 0.00012  |
| NOS3         | <a href="#">113241474</a> | 3.757553192 | 1.909794 | 1.25E-05 | 7.72E-05 |
| DMAC2L       | <a href="#">113266076</a> | 3.75632709  | 1.909323 | 7.66E-05 | 0.000394 |
| REPIN1       | <a href="#">113241464</a> | 3.753905154 | 1.908392 | 1.61E-07 | 1.43E-06 |
| CELF5        | <a href="#">113242796</a> | 3.752849238 | 1.907986 | 0.00181  | 0.006454 |
| EPB41L4B     | <a href="#">113260640</a> | 3.749679863 | 1.906767 | 0.000149 | 0.000715 |
| AMACR        | <a href="#">113260868</a> | 3.748598083 | 1.906351 | 1.66E-05 | 9.9E-05  |
| CUNH3orf18   | <a href="#">113256920</a> | 3.74835387  | 1.906257 | 0.00078  | 0.003101 |
| TMEM184A     | <a href="#">113247730</a> | 3.742373001 | 1.903953 | 0.00104  | 0.003981 |
| IGFALS       | <a href="#">113245094</a> | 3.742304539 | 1.903927 | 1.03E-05 | 6.52E-05 |
| SMIM20       | <a href="#">113266763</a> | 3.740271041 | 1.903143 | 9.98E-06 | 6.31E-05 |
| SBDS         | <a href="#">113267760</a> | 3.740005167 | 1.90304  | 5.13E-06 | 3.45E-05 |
| KCNN3        | <a href="#">113245302</a> | 3.732582874 | 1.900174 | 0.000389 | 0.001682 |
| OXA1L        | <a href="#">113246043</a> | 3.729845145 | 1.899116 | 0.000117 | 0.000576 |
| LCMT1        | <a href="#">113267594</a> | 3.72913362  | 1.89884  | 1.2E-06  | 8.98E-06 |
| SLC4A3       | <a href="#">113250414</a> | 3.728332035 | 1.89853  | 0.000489 | 0.002057 |

|              |                           |             |          |          |          |
|--------------|---------------------------|-------------|----------|----------|----------|
| HEYL         | <a href="#">113268247</a> | 3.728261085 | 1.898503 | 5.07E-07 | 4.07E-06 |
| LOC113246846 | <a href="#">113246846</a> | 3.716889029 | 1.894096 | 6.56E-06 | 4.32E-05 |
| LRRC43       | <a href="#">113266928</a> | 3.71688257  | 1.894093 | 0.001059 | 0.004045 |
| TEF          | <a href="#">113241732</a> | 3.714435706 | 1.893143 | 6.57E-06 | 4.32E-05 |
| MALL         | <a href="#">113242244</a> | 3.710609646 | 1.891656 | 0.00064  | 0.002609 |
| MEIOC        | <a href="#">113265676</a> | 3.708354466 | 1.890779 | 0.000312 | 0.001383 |
| TSNARE1      | <a href="#">113247953</a> | 3.700501604 | 1.887721 | 0.000125 | 0.000611 |
| LOC113247922 | <a href="#">113247922</a> | 3.695477365 | 1.885761 | 1.27E-05 | 7.8E-05  |
| POMGNT1      | <a href="#">113254729</a> | 3.692434443 | 1.884572 | 8.11E-06 | 5.22E-05 |
| GYG1         | <a href="#">113254042</a> | 3.691748289 | 1.884304 | 0.000867 | 0.003403 |
| CUNH6orf106  | <a href="#">113243827</a> | 3.690584246 | 1.883849 | 0.000256 | 0.00116  |
| LOC113242783 | <a href="#">113242783</a> | 3.684791335 | 1.881583 | 0.000235 | 0.001076 |
| LOC113254636 | <a href="#">113254636</a> | 3.681904493 | 1.880452 | 3.77E-06 | 2.6E-05  |
| NDUFA4L2     | <a href="#">113256390</a> | 3.677301083 | 1.878647 | 0.001745 | 0.006249 |
| LOC113247877 | <a href="#">113247877</a> | 3.676961928 | 1.878514 | 0.001742 | 0.006242 |
| POLDIP2      | <a href="#">113269025</a> | 3.676221558 | 1.878224 | 4.13E-06 | 2.82E-05 |
| CDKL5        | <a href="#">113242254</a> | 3.675688127 | 1.878014 | 0.00034  | 0.00149  |
| LOC113241423 | <a href="#">113241423</a> | 3.667294269 | 1.874716 | 0.000627 | 0.00256  |
| ACTR3B       | <a href="#">113241507</a> | 3.657492366 | 1.870855 | 1.11E-06 | 8.39E-06 |
| EEF1D        | <a href="#">113247655</a> | 3.65569526  | 1.870146 | 0.001422 | 0.005241 |
| RASD2        | <a href="#">113256004</a> | 3.653705827 | 1.86936  | 0.001031 | 0.003954 |
| CATSPERD     | <a href="#">113242861</a> | 3.65150505  | 1.868491 | 0.001273 | 0.004759 |
| ATPAF1       | <a href="#">113254713</a> | 3.650832753 | 1.868226 | 1.08E-06 | 8.19E-06 |
| SPOCK2       | <a href="#">113259155</a> | 3.650575148 | 1.868124 | 2.17E-05 | 0.000126 |
| ROMO1        | <a href="#">113258545</a> | 3.65005854  | 1.86792  | 4.67E-06 | 3.17E-05 |
| ZMAT5        | <a href="#">113245019</a> | 3.645539942 | 1.866133 | 2.27E-05 | 0.000131 |
| INSYN1       | <a href="#">113240951</a> | 3.644654032 | 1.865782 | 0.003466 | 0.011343 |
| LRRTM2       | <a href="#">113261797</a> | 3.644102694 | 1.865564 | 0.002992 | 0.009998 |

|              |                           |             |          |          |          |
|--------------|---------------------------|-------------|----------|----------|----------|
| DCAF6        | <a href="#">113262875</a> | 3.634561826 | 1.861781 | 0.000659 | 0.002677 |
| CUNH9orf16   | <a href="#">113266457</a> | 3.63428294  | 1.861671 | 3.14E-05 | 0.000175 |
| ZNF391       | <a href="#">113264258</a> | 3.632274446 | 1.860873 | 2.25E-05 | 0.00013  |
| CCDC136      | <a href="#">113263909</a> | 3.631012608 | 1.860372 | 4.25E-05 | 0.00023  |
| ZYG11B       | <a href="#">113254661</a> | 3.626846199 | 1.858716 | 4E-05    | 0.000218 |
| MRPL21       | <a href="#">113243993</a> | 3.615653444 | 1.854256 | 8.04E-06 | 5.18E-05 |
| RAPGEF1      | <a href="#">113266537</a> | 3.614830168 | 1.853928 | 1.72E-05 | 0.000103 |
| FASTK        | <a href="#">113241480</a> | 3.611712036 | 1.852683 | 7.63E-06 | 4.95E-05 |
| NOX4         | <a href="#">113269421</a> | 3.61000922  | 1.852003 | 0.002226 | 0.007732 |
| LOC113247021 | <a href="#">113247021</a> | 3.606306538 | 1.850522 | 0.001393 | 0.005149 |
| YPEL2        | <a href="#">113268888</a> | 3.605804345 | 1.850321 | 2.2E-05  | 0.000128 |
| AVPI1        | <a href="#">113251796</a> | 3.603725364 | 1.849489 | 0.000616 | 0.002525 |
| PLEKHH3      | <a href="#">113265409</a> | 3.603014788 | 1.849205 | 3.91E-06 | 2.69E-05 |
| EML1         | <a href="#">113267272</a> | 3.601332967 | 1.848531 | 0.000235 | 0.001077 |
| PIH1D1       | <a href="#">113243302</a> | 3.599848866 | 1.847936 | 2.04E-06 | 1.47E-05 |
| CGNL1        | <a href="#">113269670</a> | 3.59961167  | 1.847841 | 2.86E-05 | 0.000162 |
| ANO5         | <a href="#">113265108</a> | 3.598247884 | 1.847295 | 0.006651 | 0.019871 |
| GMPS         | <a href="#">113254098</a> | 3.593739088 | 1.845486 | 0.000134 | 0.000651 |
| SLC7A6OS     | <a href="#">113252408</a> | 3.592077977 | 1.844819 | 1.13E-05 | 7.03E-05 |
| NEDD4L       | <a href="#">113253456</a> | 3.590042364 | 1.844001 | 4.92E-06 | 3.32E-05 |
| GAL3ST2      | <a href="#">113249264</a> | 3.588002696 | 1.843181 | 0.000785 | 0.003116 |
| F3           | <a href="#">113254382</a> | 3.58712502  | 1.842828 | 0.001606 | 0.005826 |
| TMEM134      | <a href="#">113244024</a> | 3.586823694 | 1.842707 | 2.17E-06 | 1.56E-05 |
| APPL1        | <a href="#">113257000</a> | 3.586415354 | 1.842543 | 3.51E-06 | 2.43E-05 |
| CRYBG3       | <a href="#">113250328</a> | 3.58226459  | 1.840872 | 0.000178 | 0.000843 |
| MEF2A        | <a href="#">113263641</a> | 3.579281776 | 1.83967  | 6.59E-07 | 5.2E-06  |
| ADCY10       | <a href="#">113262877</a> | 3.579032156 | 1.83957  | 0.003191 | 0.010557 |
| PAIP2B       | <a href="#">113244155</a> | 3.576908199 | 1.838713 | 2.02E-05 | 0.000118 |

|              |                           |             |          |          |          |
|--------------|---------------------------|-------------|----------|----------|----------|
| ATP5MC3      | <a href="#">113250747</a> | 3.575720243 | 1.838234 | 0.001031 | 0.003954 |
| CEP85L       | <a href="#">113259392</a> | 3.574804437 | 1.837864 | 5.18E-06 | 3.49E-05 |
| TMEM159      | <a href="#">113267545</a> | 3.573363401 | 1.837283 | 1.3E-06  | 9.7E-06  |
| ZNF524       | <a href="#">113247354</a> | 3.56960476  | 1.835764 | 9.97E-06 | 6.3E-05  |
| TUFM         | <a href="#">113267631</a> | 3.569499479 | 1.835722 | 0.000335 | 0.001469 |
| DLD          | <a href="#">113258483</a> | 3.566928697 | 1.834682 | 0.001165 | 0.004399 |
| CRIM1        | <a href="#">113241217</a> | 3.564725219 | 1.833791 | 9.95E-05 | 0.000499 |
| SDHA         | <a href="#">113260769</a> | 3.551950163 | 1.828611 | 0.000354 | 0.001546 |
| CLEC14A      | <a href="#">113266145</a> | 3.551781527 | 1.828543 | 4.67E-06 | 3.17E-05 |
| SDR39U1      | <a href="#">113246062</a> | 3.549307038 | 1.827537 | 9.03E-05 | 0.000457 |
| TMEM30B      | <a href="#">113242411</a> | 3.54742764  | 1.826773 | 0.002505 | 0.008557 |
| LOC113258537 | <a href="#">113258537</a> | 3.546022548 | 1.826202 | 1.72E-05 | 0.000102 |
| LOC113253205 | <a href="#">113253205</a> | 3.545114425 | 1.825832 | 2.89E-05 | 0.000164 |
| PCBD2        | <a href="#">113261752</a> | 3.544442697 | 1.825559 | 4.42E-06 | 3.01E-05 |
| ADAMTSL3     | <a href="#">113263758</a> | 3.544401778 | 1.825542 | 0.000146 | 0.000702 |
| PLCB4        | <a href="#">113258346</a> | 3.539653277 | 1.823608 | 0.000218 | 0.001005 |
| CATSPER3     | <a href="#">113261753</a> | 3.536271087 | 1.822229 | 0.001098 | 0.004174 |
| ZXDC         | <a href="#">113257283</a> | 3.532674258 | 1.820761 | 2.51E-06 | 1.78E-05 |
| VEGFB        | <a href="#">113244181</a> | 3.528584524 | 1.81909  | 0.001352 | 0.005014 |
| TIGD3        | <a href="#">113243923</a> | 3.526810685 | 1.818364 | 0.001581 | 0.005754 |
| APOPT1       | <a href="#">113267216</a> | 3.524507604 | 1.817422 | 1.52E-05 | 9.17E-05 |
| LOC113265291 | <a href="#">113265291</a> | 3.520374274 | 1.815729 | 8.54E-06 | 5.48E-05 |
| PIK3IP1      | <a href="#">113245057</a> | 3.518942195 | 1.815142 | 0.000187 | 0.000879 |
| PPFIBP1      | <a href="#">113257771</a> | 3.510416902 | 1.811642 | 3.28E-06 | 2.28E-05 |
| PDHX         | <a href="#">113265044</a> | 3.507148103 | 1.810298 | 0.000126 | 0.000617 |
| LOC113248583 | <a href="#">113248583</a> | 3.503187132 | 1.808668 | 0.000305 | 0.001356 |
| RPS29        | <a href="#">113266188</a> | 3.499883319 | 1.807307 | 0.00435  | 0.013767 |
| COQ6         | <a href="#">113270341</a> | 3.49963143  | 1.807203 | 3E-06    | 2.1E-05  |

|              |                           |             |          |          |          |
|--------------|---------------------------|-------------|----------|----------|----------|
| YBX2         | <a href="#">113271116</a> | 3.499617162 | 1.807197 | 0.000601 | 0.002467 |
| MAVS         | <a href="#">113258384</a> | 3.4958603   | 1.805648 | 1.64E-06 | 1.2E-05  |
| ACKR3        | <a href="#">113250308</a> | 3.488821828 | 1.80274  | 0.003605 | 0.011736 |
| EIF3G        | <a href="#">113242974</a> | 3.488490533 | 1.802603 | 0.000421 | 0.0018   |
| ENHO         | <a href="#">113260508</a> | 3.488172505 | 1.802471 | 0.000769 | 0.003064 |
| SPINK2       | <a href="#">113262527</a> | 3.483467    | 1.800524 | 0.000823 | 0.003254 |
| MRPS25       | <a href="#">113257208</a> | 3.480569347 | 1.799323 | 4.47E-06 | 3.04E-05 |
| SLC4A4       | <a href="#">113263295</a> | 3.480401025 | 1.799254 | 0.007118 | 0.021017 |
| LOC113247912 | <a href="#">113247912</a> | 3.47871395  | 1.798554 | 0.002339 | 0.008064 |
| ATXN7L2      | <a href="#">113244924</a> | 3.475356065 | 1.797161 | 0.000112 | 0.000557 |
| POU6F1       | <a href="#">113257612</a> | 3.472595388 | 1.796014 | 6.11E-05 | 0.000322 |
| AMOTL1       | <a href="#">113259818</a> | 3.468205742 | 1.794189 | 4.56E-05 | 0.000246 |
| PRKAR2A      | <a href="#">113256848</a> | 3.467441067 | 1.793871 | 0.000783 | 0.003113 |
| LOC113254662 | <a href="#">113254662</a> | 3.465723371 | 1.793157 | 0.000167 | 0.000793 |
| ZNF594       | <a href="#">113271063</a> | 3.463772534 | 1.792344 | 0.001363 | 0.00505  |
| ID1          | <a href="#">113258459</a> | 3.461662916 | 1.791465 | 1.94E-05 | 0.000114 |
| DIP2C        | <a href="#">113241102</a> | 3.459304406 | 1.790482 | 1.98E-06 | 1.43E-05 |
| CREM         | <a href="#">113244224</a> | 3.458214465 | 1.790027 | 1.19E-05 | 7.41E-05 |
| MAP4         | <a href="#">113256822</a> | 3.457188853 | 1.789599 | 0.002493 | 0.008523 |
| CUNH14orf132 | <a href="#">113267299</a> | 3.455865418 | 1.789047 | 0.012174 | 0.033026 |
| RIC8B        | <a href="#">113256034</a> | 3.454698727 | 1.78856  | 4.38E-06 | 2.99E-05 |
| CDH6         | <a href="#">113260848</a> | 3.452467856 | 1.787628 | 0.000698 | 0.002819 |
| LRRC66       | <a href="#">113262481</a> | 3.449724097 | 1.786481 | 0.000739 | 0.002959 |
| VMA21        | <a href="#">113246824</a> | 3.444533538 | 1.784309 | 2.16E-05 | 0.000126 |
| NDUFC1       | <a href="#">113255686</a> | 3.442579605 | 1.78349  | 1.68E-05 | 0.0001   |
| SGCB         | <a href="#">113262483</a> | 3.442086369 | 1.783283 | 0.000701 | 0.002825 |
| LOC113260556 | <a href="#">113260556</a> | 3.440184957 | 1.782486 | 0.002187 | 0.007616 |
| ACAA2        | <a href="#">113253408</a> | 3.439193221 | 1.78207  | 0.000414 | 0.001775 |

|              |                           |             |          |          |          |
|--------------|---------------------------|-------------|----------|----------|----------|
| OLFML2A      | <a href="#">113266401</a> | 3.434517205 | 1.780107 | 0.000115 | 0.000569 |
| HINT3        | <a href="#">113259418</a> | 3.434023859 | 1.7799   | 0.000189 | 0.000886 |
| AMIGO2       | <a href="#">113257695</a> | 3.43372626  | 1.779775 | 0.01055  | 0.029196 |
| PDCD2L       | <a href="#">113244745</a> | 3.432722361 | 1.779353 | 0.000268 | 0.001207 |
| TMEM255A     | <a href="#">113270909</a> | 3.426475939 | 1.776726 | 0.003208 | 0.010606 |
| CPEB3        | <a href="#">113243165</a> | 3.425567628 | 1.776343 | 3.1E-05  | 0.000173 |
| LOC113265073 | <a href="#">113265073</a> | 3.418345673 | 1.773298 | 0.007151 | 0.021095 |
| NDUFB1       | <a href="#">113267167</a> | 3.415993453 | 1.772305 | 5.17E-06 | 3.48E-05 |
| UBE3D        | <a href="#">113261067</a> | 3.415799139 | 1.772223 | 2.93E-05 | 0.000165 |
| NDUFS5       | <a href="#">113268254</a> | 3.411185816 | 1.770273 | 6.72E-05 | 0.00035  |
| LRRC28       | <a href="#">113263643</a> | 3.410676985 | 1.770058 | 9.2E-05  | 0.000464 |
| ASB9         | <a href="#">113240712</a> | 3.409259744 | 1.769459 | 0.00058  | 0.002394 |
| LAMA3        | <a href="#">113253294</a> | 3.407777798 | 1.768831 | 2.38E-05 | 0.000137 |
| NR3C2        | <a href="#">113255738</a> | 3.406989183 | 1.768497 | 4.56E-05 | 0.000246 |
| RAMP3        | <a href="#">113257714</a> | 3.406345448 | 1.768225 | 0.000741 | 0.002967 |
| LYSMD2       | <a href="#">113269627</a> | 3.404966137 | 1.76764  | 9.9E-05  | 0.000497 |
| RAB9B        | <a href="#">113248103</a> | 3.395980463 | 1.763828 | 0.002074 | 0.007258 |
| MICU3        | <a href="#">113262162</a> | 3.391900113 | 1.762094 | 7.07E-05 | 0.000367 |
| IGFBP3       | <a href="#">113257692</a> | 3.391405912 | 1.761883 | 0.000638 | 0.002602 |
| PAQR6        | <a href="#">113245241</a> | 3.388994821 | 1.760857 | 0.001753 | 0.006275 |
| HOXD8        | <a href="#">113250741</a> | 3.38647232  | 1.759783 | 0.000437 | 0.00186  |
| ATP5F1E      | <a href="#">113258773</a> | 3.383238802 | 1.758405 | 0.001436 | 0.005284 |
| PPT2         | <a href="#">113243752</a> | 3.382448144 | 1.758068 | 3.13E-05 | 0.000175 |
| CRYGN        | <a href="#">113241492</a> | 3.381813683 | 1.757797 | 0.002068 | 0.00724  |
| LOC113249678 | <a href="#">113249678</a> | 3.381784643 | 1.757785 | 0.00072  | 0.002894 |
| GKAP1        | <a href="#">113269812</a> | 3.381160965 | 1.757519 | 2.87E-05 | 0.000163 |
| F8           | <a href="#">113248344</a> | 3.378847678 | 1.756531 | 8.01E-06 | 5.17E-05 |
| AKTIP        | <a href="#">113252238</a> | 3.3778185   | 1.756092 | 5.18E-06 | 3.48E-05 |

|              |                           |             |          |          |          |
|--------------|---------------------------|-------------|----------|----------|----------|
| RPL36        | <a href="#">113242860</a> | 3.377394781 | 1.755911 | 0.001506 | 0.005519 |
| PPIF         | <a href="#">113259219</a> | 3.377145178 | 1.755804 | 5.11E-05 | 0.000274 |
| PAX1         | <a href="#">113246770</a> | 3.375600611 | 1.755144 | 0.000765 | 0.003053 |
| NICN1        | <a href="#">113256875</a> | 3.374928071 | 1.754857 | 5.15E-05 | 0.000276 |
| DOCK9        | <a href="#">113251489</a> | 3.372852403 | 1.753969 | 0.000307 | 0.001367 |
| KLHL3        | <a href="#">113261768</a> | 3.372512597 | 1.753824 | 0.000216 | 0.001    |
| EIF1         | <a href="#">113265448</a> | 3.369293016 | 1.752446 | 0.002273 | 0.00787  |
| ETFA         | <a href="#">113248087</a> | 3.366827865 | 1.75139  | 0.0006   | 0.002463 |
| PPP1R2       | <a href="#">113253297</a> | 3.365070153 | 1.750637 | 9.29E-05 | 0.000469 |
| MYLK3        | <a href="#">113252202</a> | 3.364743685 | 1.750497 | 0.000791 | 0.003136 |
| CA8          | <a href="#">113268071</a> | 3.362669725 | 1.749607 | 0.005569 | 0.017079 |
| TIMM10       | <a href="#">113246386</a> | 3.360979145 | 1.748882 | 1.46E-05 | 8.86E-05 |
| DNAJB4       | <a href="#">113254500</a> | 3.360159745 | 1.74853  | 3.75E-05 | 0.000206 |
| HSF2BP       | <a href="#">113253534</a> | 3.359879498 | 1.748409 | 0.003219 | 0.010634 |
| KANK3        | <a href="#">113242903</a> | 3.35878905  | 1.747941 | 1.97E-05 | 0.000115 |
| EGFL7        | <a href="#">113248635</a> | 3.358451504 | 1.747796 | 0.000227 | 0.001044 |
| LOC113249852 | <a href="#">113249852</a> | 3.345980624 | 1.742429 | 0.004494 | 0.014173 |
| LOC113251944 | <a href="#">113251944</a> | 3.344200335 | 1.741661 | 2.83E-05 | 0.000161 |
| RPS11        | <a href="#">113243297</a> | 3.342725509 | 1.741025 | 0.015891 | 0.041499 |
| NFU1         | <a href="#">113244593</a> | 3.342541885 | 1.740946 | 0.000218 | 0.001006 |
| MTHFD2L      | <a href="#">113263273</a> | 3.342135295 | 1.74077  | 0.001544 | 0.005636 |
| PLCH2        | <a href="#">113270598</a> | 3.340930487 | 1.74025  | 0.004913 | 0.015351 |
| LOC113266881 | <a href="#">113266881</a> | 3.340637861 | 1.740124 | 0.003867 | 0.012438 |
| DLL4         | <a href="#">113242017</a> | 3.337376829 | 1.738715 | 9.73E-05 | 0.000489 |
| IL20RB       | <a href="#">113253976</a> | 3.33627415  | 1.738238 | 0.001155 | 0.00437  |
| SEZ6L2       | <a href="#">113267659</a> | 3.333547304 | 1.737058 | 0.00139  | 0.00514  |
| SLC35E4      | <a href="#">113245043</a> | 3.333370453 | 1.736982 | 0.001078 | 0.004107 |
| STAC2        | <a href="#">113265524</a> | 3.331141012 | 1.736016 | 0.003093 | 0.010266 |

|              |                           |             |          |          |          |
|--------------|---------------------------|-------------|----------|----------|----------|
| KIF5A        | <a href="#">113256376</a> | 3.330410028 | 1.7357   | 0.002441 | 0.008371 |
| KLC2         | <a href="#">113244076</a> | 3.329548735 | 1.735327 | 2.99E-05 | 0.000168 |
| GPR176       | <a href="#">113242047</a> | 3.329280627 | 1.73521  | 0.003092 | 0.010262 |
| EEPD1        | <a href="#">113262749</a> | 3.3271882   | 1.734303 | 1.7E-05  | 0.000101 |
| FAN1         | <a href="#">113263610</a> | 3.326754004 | 1.734115 | 3.25E-06 | 2.26E-05 |
| METTL25      | <a href="#">113256211</a> | 3.324669791 | 1.733211 | 1.31E-05 | 8.04E-05 |
| HOXA4        | <a href="#">113261989</a> | 3.321005488 | 1.73162  | 0.002582 | 0.008785 |
| TRNP1        | <a href="#">113268445</a> | 3.319231645 | 1.730849 | 0.00246  | 0.008424 |
| KIRREL2      | <a href="#">113244768</a> | 3.317684807 | 1.730177 | 0.004848 | 0.015177 |
| OTUD6B       | <a href="#">113252945</a> | 3.314109655 | 1.728621 | 7E-06    | 4.58E-05 |
| LOC113245484 | <a href="#">113245484</a> | 3.313583272 | 1.728392 | 0.002849 | 0.009569 |
| HSD11B1      | <a href="#">113262645</a> | 3.312689487 | 1.728003 | 0.004546 | 0.014315 |
| AIMP2        | <a href="#">113267935</a> | 3.31022476  | 1.726929 | 5.39E-06 | 3.61E-05 |
| ZSCAN23      | <a href="#">113248160</a> | 3.309281715 | 1.726518 | 0.000293 | 0.001312 |
| CBX7         | <a href="#">113241765</a> | 3.308187355 | 1.726041 | 0.000142 | 0.000685 |
| SORBS3       | <a href="#">113270000</a> | 3.304664506 | 1.724504 | 1.94E-05 | 0.000114 |
| NDUFA2       | <a href="#">113261833</a> | 3.304150656 | 1.724279 | 4.75E-05 | 0.000255 |
| PPIP5K1      | <a href="#">113241961</a> | 3.303392757 | 1.723949 | 7.88E-06 | 5.1E-05  |
| LOC113251647 | <a href="#">113251647</a> | 3.300370629 | 1.722628 | 6.58E-05 | 0.000343 |
| LOC113249996 | <a href="#">113249996</a> | 3.299999582 | 1.722466 | 0.000824 | 0.003256 |
| ZNF768       | <a href="#">113267684</a> | 3.296789498 | 1.721062 | 2.54E-05 | 0.000145 |
| LRRFIP2      | <a href="#">113253771</a> | 3.291459626 | 1.718728 | 8.89E-06 | 5.68E-05 |
| SMC1B        | <a href="#">113241654</a> | 3.289621151 | 1.717921 | 0.003595 | 0.011709 |
| CD101        | <a href="#">113244376</a> | 3.288270827 | 1.717329 | 0.008184 | 0.023616 |
| CNTNAP2      | <a href="#">113241449</a> | 3.287882427 | 1.717159 | 0.007861 | 0.022875 |
| DOCK6        | <a href="#">113243014</a> | 3.287431334 | 1.716961 | 1.3E-05  | 7.99E-05 |
| STAU2        | <a href="#">113253047</a> | 3.287052728 | 1.716795 | 8.96E-06 | 5.72E-05 |
| NCBP2-AS2    | <a href="#">113253142</a> | 3.285664605 | 1.716185 | 3.53E-05 | 0.000195 |

|              |                           |             |          |          |          |
|--------------|---------------------------|-------------|----------|----------|----------|
| FEZ1         | <a href="#">113259906</a> | 3.28492096  | 1.715859 | 0.00271  | 0.009173 |
| RTKN         | <a href="#">113243549</a> | 3.282075499 | 1.714608 | 2.72E-05 | 0.000155 |
| HSPB1        | <a href="#">113267813</a> | 3.278535964 | 1.713052 | 0.000425 | 0.001817 |
| IL33         | <a href="#">113260625</a> | 3.276372815 | 1.7121   | 0.002602 | 0.008838 |
| TMEM150A     | <a href="#">113243094</a> | 3.27145468  | 1.709932 | 2.66E-05 | 0.000152 |
| LOC113247253 | <a href="#">113247253</a> | 3.271232642 | 1.709834 | 1.3E-05  | 7.98E-05 |
| PERP         | <a href="#">113259487</a> | 3.270614368 | 1.709562 | 0.002334 | 0.008052 |
| TMEM63C      | <a href="#">113270297</a> | 3.266683308 | 1.707827 | 0.004453 | 0.014053 |
| ANHX         | <a href="#">113266821</a> | 3.264827791 | 1.707007 | 0.004274 | 0.013565 |
| ARHGEF10L    | <a href="#">113270439</a> | 3.264590935 | 1.706902 | 7.82E-06 | 5.07E-05 |
| BNIP3        | <a href="#">113252072</a> | 3.264225442 | 1.706741 | 0.002829 | 0.009515 |
| LOC113241880 | <a href="#">113241880</a> | 3.262983836 | 1.706192 | 0.008391 | 0.024114 |
| TFB2M        | <a href="#">113262945</a> | 3.261730541 | 1.705638 | 6.36E-05 | 0.000334 |
| ECSIT        | <a href="#">113243030</a> | 3.261076682 | 1.705348 | 1.06E-05 | 6.69E-05 |
| CTF1         | <a href="#">113267705</a> | 3.260390783 | 1.705045 | 0.003193 | 0.01056  |
| CPN1         | <a href="#">113251825</a> | 3.259239549 | 1.704535 | 0.001032 | 0.003957 |
| TBX3         | <a href="#">113267002</a> | 3.258324578 | 1.70413  | 0.00092  | 0.003577 |
| TOMM40L      | <a href="#">113246746</a> | 3.257914495 | 1.703949 | 5.92E-05 | 0.000312 |
| ALKBH5       | <a href="#">113271291</a> | 3.255584654 | 1.702917 | 6.56E-05 | 0.000343 |
| BHLHB9       | <a href="#">113244314</a> | 3.255550596 | 1.702902 | 2.94E-05 | 0.000166 |
| LOC113242947 | <a href="#">113242947</a> | 3.254080071 | 1.70225  | 0.000158 | 0.000755 |
| LOC113247867 | <a href="#">113247867</a> | 3.252606655 | 1.701596 | 0.000699 | 0.002822 |
| CUNH6orf203  | <a href="#">113264776</a> | 3.252515718 | 1.701556 | 3.9E-05  | 0.000213 |
| CACNG7       | <a href="#">113247410</a> | 3.25223201  | 1.70143  | 0.006226 | 0.018821 |
| B3GALNT2     | <a href="#">113259001</a> | 3.250909546 | 1.700843 | 7.3E-05  | 0.000378 |
| HIGD2A       | <a href="#">113264125</a> | 3.247908071 | 1.699511 | 6.3E-05  | 0.000331 |
| MRPL24       | <a href="#">113245221</a> | 3.247124686 | 1.699163 | 2.84E-05 | 0.000161 |
| MAP3K10      | <a href="#">113243573</a> | 3.247044922 | 1.699127 | 0.00012  | 0.000589 |

|              |                           |             |          |          |          |
|--------------|---------------------------|-------------|----------|----------|----------|
| GRTP1        | <a href="#">113247574</a> | 3.244403028 | 1.697953 | 0.005745 | 0.017561 |
| GBX1         | <a href="#">113241483</a> | 3.244314094 | 1.697913 | 0.003987 | 0.012774 |
| FBXL8        | <a href="#">113252354</a> | 3.243087029 | 1.697368 | 0.002653 | 0.008994 |
| WSCD1        | <a href="#">113271054</a> | 3.241164239 | 1.696512 | 1.95E-05 | 0.000114 |
| TMEM51       | <a href="#">113270481</a> | 3.240518983 | 1.696225 | 0.00107  | 0.004082 |
| MYO18A       | <a href="#">113269060</a> | 3.238414511 | 1.695288 | 0.000779 | 0.003097 |
| PADI2        | <a href="#">113270446</a> | 3.236029531 | 1.694225 | 0.009881 | 0.02763  |
| GPR75        | <a href="#">113245790</a> | 3.235099395 | 1.69381  | 0.003227 | 0.010653 |
| CCDC85A      | <a href="#">113245393</a> | 3.232152111 | 1.692495 | 0.003833 | 0.01236  |
| ZBTB47       | <a href="#">113253822</a> | 3.2260961   | 1.689789 | 0.000535 | 0.002222 |
| MMP24        | <a href="#">113258534</a> | 3.225922897 | 1.689712 | 0.001628 | 0.005891 |
| TRHDE        | <a href="#">113256259</a> | 3.225791202 | 1.689653 | 0.005813 | 0.017745 |
| KCNQ5        | <a href="#">113261119</a> | 3.22546534  | 1.689507 | 0.008045 | 0.023317 |
| RPL35A       | <a href="#">113252711</a> | 3.223755385 | 1.688742 | 0.012074 | 0.032784 |
| NRN1         | <a href="#">113264419</a> | 3.222334922 | 1.688106 | 0.005384 | 0.016621 |
| NDUFB3       | <a href="#">113250598</a> | 3.21772801  | 1.686042 | 6.63E-05 | 0.000346 |
| MYORG        | <a href="#">113260509</a> | 3.215011339 | 1.684824 | 0.008114 | 0.023467 |
| PSTPIP2      | <a href="#">113253373</a> | 3.212991557 | 1.683917 | 0.000226 | 0.001039 |
| LOC113254434 | <a href="#">113254434</a> | 3.209359011 | 1.682285 | 9.07E-05 | 0.000459 |
| CIART        | <a href="#">113246110</a> | 3.208303655 | 1.681811 | 0.006768 | 0.020136 |
| MRPS2        | <a href="#">113266589</a> | 3.20653382  | 1.681015 | 0.000104 | 0.00052  |
| THSD1        | <a href="#">113251287</a> | 3.205870368 | 1.680716 | 0.003461 | 0.011332 |
| STAC         | <a href="#">113253765</a> | 3.205029479 | 1.680338 | 0.013498 | 0.036046 |
| SLC25A42     | <a href="#">113256741</a> | 3.203746704 | 1.67976  | 0.002398 | 0.008235 |
| SQSTM1       | <a href="#">113261555</a> | 3.20347816  | 1.679639 | 0.002571 | 0.008752 |
| TCTA         | <a href="#">113256877</a> | 3.203353044 | 1.679583 | 1.4E-05  | 8.55E-05 |
| RITA1        | <a href="#">113266990</a> | 3.202574242 | 1.679232 | 1.28E-05 | 7.86E-05 |
| CDC37L1      | <a href="#">113270165</a> | 3.198859087 | 1.677557 | 2.56E-06 | 1.82E-05 |

|              |                           |             |          |          |          |
|--------------|---------------------------|-------------|----------|----------|----------|
| ISLR         | <a href="#">113240961</a> | 3.197064578 | 1.676748 | 0.000753 | 0.00301  |
| TSPAN3       | <a href="#">113241005</a> | 3.193557791 | 1.675165 | 0.000507 | 0.002125 |
| HES4         | <a href="#">113270655</a> | 3.192903465 | 1.674869 | 4.17E-05 | 0.000226 |
| L2HGDH       | <a href="#">113266207</a> | 3.192701414 | 1.674778 | 4.56E-05 | 0.000246 |
| SH3GL3       | <a href="#">113263757</a> | 3.191801043 | 1.674371 | 0.001704 | 0.006125 |
| CUNH16orf95  | <a href="#">113252171</a> | 3.187520806 | 1.672435 | 0.010321 | 0.028684 |
| NOV          | <a href="#">113252778</a> | 3.18730676  | 1.672338 | 0.005888 | 0.017944 |
| LOC113271076 | <a href="#">113271076</a> | 3.183638048 | 1.670676 | 0.006671 | 0.019916 |
| RTN4         | <a href="#">113245629</a> | 3.183131295 | 1.670447 | 0.01305  | 0.035064 |
| GPIHBP1      | <a href="#">113247595</a> | 3.18062491  | 1.66931  | 0.0023   | 0.007948 |
| ITGA3        | <a href="#">113265609</a> | 3.18030223  | 1.669164 | 0.000486 | 0.002047 |
| LOC113270384 | <a href="#">113270384</a> | 3.180292033 | 1.669159 | 0.000119 | 0.000587 |
| WSB2         | <a href="#">113267016</a> | 3.180198765 | 1.669117 | 8.34E-05 | 0.000426 |
| RUNDC3B      | <a href="#">113259507</a> | 3.179494246 | 1.668797 | 4.68E-05 | 0.000252 |
| DLGAP1       | <a href="#">113253243</a> | 3.179394387 | 1.668752 | 0.002276 | 0.007879 |
| LOC113247252 | <a href="#">113247252</a> | 3.175718691 | 1.667083 | 0.003653 | 0.011857 |
| AGMO         | <a href="#">113260890</a> | 3.174381325 | 1.666475 | 0.006392 | 0.019223 |
| TCEAL1       | <a href="#">113249836</a> | 3.173393193 | 1.666026 | 4.06E-05 | 0.000221 |
| LOC113246566 | <a href="#">113246566</a> | 3.17200725  | 1.665396 | 5.81E-05 | 0.000307 |
| LOC113249742 | <a href="#">113249742</a> | 3.170074408 | 1.664517 | 3.01E-05 | 0.000169 |
| CMC4         | <a href="#">113248350</a> | 3.169996927 | 1.664481 | 0.000369 | 0.001602 |
| SPARCL1      | <a href="#">113263168</a> | 3.168479972 | 1.663791 | 0.00688  | 0.020393 |
| CUNH8orf59   | <a href="#">113252990</a> | 3.167856619 | 1.663507 | 2.91E-05 | 0.000164 |
| HOXB8        | <a href="#">113265579</a> | 3.166925327 | 1.663083 | 0.013044 | 0.035057 |
| NRIP2        | <a href="#">113258024</a> | 3.166214322 | 1.662759 | 0.004041 | 0.012929 |
| RSL24D1      | <a href="#">113269645</a> | 3.16592679  | 1.662628 | 7.27E-06 | 4.74E-05 |
| N4BP2L2      | <a href="#">113251246</a> | 3.165777312 | 1.66256  | 1.9E-05  | 0.000112 |
| EPB41L4A     | <a href="#">113254993</a> | 3.165122854 | 1.662261 | 2.78E-05 | 0.000158 |

|              |                           |             |          |          |          |
|--------------|---------------------------|-------------|----------|----------|----------|
| PARP6        | <a href="#">113240936</a> | 3.165115072 | 1.662258 | 7.75E-06 | 5.02E-05 |
| CCDC127      | <a href="#">113260770</a> | 3.164643826 | 1.662043 | 2.45E-05 | 0.00014  |
| LOC113249961 | <a href="#">113249961</a> | 3.16102192  | 1.660391 | 0.001924 | 0.006793 |
| CRADD        | <a href="#">113256160</a> | 3.15696846  | 1.65854  | 0.000787 | 0.003125 |
| PPP1R3B      | <a href="#">113262116</a> | 3.155693908 | 1.657957 | 0.001434 | 0.005279 |
| SNX21        | <a href="#">113258661</a> | 3.152923641 | 1.65669  | 0.000715 | 0.002875 |
| CXXC5        | <a href="#">113261811</a> | 3.149974377 | 1.65534  | 4.74E-06 | 3.21E-05 |
| UBAP1L       | <a href="#">113240866</a> | 3.148494603 | 1.654662 | 0.003127 | 0.010372 |
| RTN4RL1      | <a href="#">113268835</a> | 3.148352228 | 1.654597 | 0.006576 | 0.019686 |
| PTPRM        | <a href="#">113253224</a> | 3.147507696 | 1.65421  | 0.000406 | 0.001747 |
| LOC113268544 | <a href="#">113268544</a> | 3.145088594 | 1.653101 | 3.82E-05 | 0.00021  |
| CCL21        | <a href="#">113260498</a> | 3.143514349 | 1.652378 | 0.007823 | 0.022777 |
| ZHX2         | <a href="#">113252762</a> | 3.138849228 | 1.650236 | 0.000123 | 0.000601 |
| FOXN3        | <a href="#">113267374</a> | 3.136606716 | 1.649205 | 1.47E-05 | 8.91E-05 |
| NUDT13       | <a href="#">113259171</a> | 3.128458385 | 1.645452 | 0.000299 | 0.001334 |
| LARGE1       | <a href="#">113256015</a> | 3.127513933 | 1.645016 | 0.008572 | 0.024544 |
| EMCN         | <a href="#">113263107</a> | 3.124377145 | 1.643569 | 2.59E-05 | 0.000148 |
| LOC113253436 | <a href="#">113253436</a> | 3.123275119 | 1.64306  | 0.008909 | 0.025359 |
| TMEM236      | <a href="#">113241363</a> | 3.123263769 | 1.643054 | 0.001395 | 0.005153 |
| SLC45A3      | <a href="#">113242479</a> | 3.123023743 | 1.642944 | 0.001883 | 0.006671 |
| ZNF385C      | <a href="#">113265680</a> | 3.122282027 | 1.642601 | 0.005295 | 0.01637  |
| ALKBH8       | <a href="#">113260110</a> | 3.121870715 | 1.642411 | 0.001384 | 0.005121 |
| PCDH19       | <a href="#">113244289</a> | 3.115815013 | 1.63961  | 0.00244  | 0.008369 |
| SLC18B1      | <a href="#">113259462</a> | 3.114702259 | 1.639094 | 0.000133 | 0.000644 |
| BOD1         | <a href="#">113264110</a> | 3.113880542 | 1.638714 | 0.000369 | 0.001602 |
| SBSPON       | <a href="#">113253052</a> | 3.113493738 | 1.638534 | 0.004117 | 0.013133 |
| NDUFA13      | <a href="#">113256757</a> | 3.111234702 | 1.637487 | 0.000117 | 0.000578 |
| NRBF2        | <a href="#">113259094</a> | 3.10769837  | 1.635846 | 9.48E-05 | 0.000478 |

|              |                           |             |          |          |          |
|--------------|---------------------------|-------------|----------|----------|----------|
| PRXL2B       | <a href="#">113270607</a> | 3.105641184 | 1.634891 | 0.000725 | 0.002911 |
| RNF7         | <a href="#">113254010</a> | 3.104978476 | 1.634583 | 5.11E-05 | 0.000274 |
| DNAJC28      | <a href="#">113264408</a> | 3.10462868  | 1.634421 | 0.000128 | 0.000625 |
| CAPN12       | <a href="#">113243610</a> | 3.100449573 | 1.632477 | 0.004223 | 0.013424 |
| CARD10       | <a href="#">113241807</a> | 3.099355978 | 1.631968 | 0.000917 | 0.003567 |
| LOC113249681 | <a href="#">113249681</a> | 3.098280033 | 1.631468 | 0.001884 | 0.006674 |
| VOPP1        | <a href="#">113257409</a> | 3.097741038 | 1.631217 | 0.004617 | 0.014528 |
| LIMD1        | <a href="#">113256777</a> | 3.097736055 | 1.631214 | 3.14E-05 | 0.000175 |
| RPL38        | <a href="#">113265208</a> | 3.096636073 | 1.630702 | 0.001757 | 0.006281 |
| YPEL1        | <a href="#">113247045</a> | 3.093371988 | 1.62918  | 8.11E-05 | 0.000416 |
| AR           | <a href="#">113245650</a> | 3.092719756 | 1.628876 | 3.91E-05 | 0.000214 |
| LOC113248605 | <a href="#">113248605</a> | 3.090354863 | 1.627773 | 0.001261 | 0.004721 |
| MAN2A2       | <a href="#">113263716</a> | 3.089952192 | 1.627585 | 8.81E-05 | 0.000448 |
| NCALD        | <a href="#">113252864</a> | 3.089374358 | 1.627315 | 0.00385  | 0.012393 |
| ZNF76        | <a href="#">113243840</a> | 3.089250653 | 1.627257 | 2.22E-05 | 0.000129 |
| COP3         | <a href="#">113271306</a> | 3.088961464 | 1.627122 | 2.2E-05  | 0.000128 |
| VEGFA        | <a href="#">113261040</a> | 3.088011465 | 1.626678 | 0.0001   | 0.000503 |
| PDE7B        | <a href="#">113259477</a> | 3.087595446 | 1.626484 | 1.6E-05  | 9.6E-05  |
| TM4SF1       | <a href="#">113254048</a> | 3.084033852 | 1.624819 | 0.000682 | 0.002763 |
| TOMM7        | <a href="#">113261301</a> | 3.08198868  | 1.623862 | 7.41E-05 | 0.000383 |
| VEZT         | <a href="#">113256140</a> | 3.081964155 | 1.62385  | 3.8E-05  | 0.000209 |
| PBX1         | <a href="#">113268685</a> | 3.08132823  | 1.623552 | 1.42E-05 | 8.63E-05 |
| RHOBTB2      | <a href="#">113269988</a> | 3.078871668 | 1.622402 | 6.48E-05 | 0.000339 |
| ARHGAP29     | <a href="#">113254388</a> | 3.076986041 | 1.621518 | 0.000246 | 0.00112  |
| DMWD         | <a href="#">113243413</a> | 3.075466176 | 1.620805 | 0.000118 | 0.00058  |
| LOC113261640 | <a href="#">113261640</a> | 3.074625005 | 1.62041  | 0.003889 | 0.012499 |
| AMT          | <a href="#">113256872</a> | 3.07061378  | 1.618527 | 0.000723 | 0.002904 |
| LOC113257493 | <a href="#">113257493</a> | 3.070480985 | 1.618465 | 0.005897 | 0.017965 |

|              |                           |             |          |          |          |
|--------------|---------------------------|-------------|----------|----------|----------|
| SLIRP        | <a href="#">113270282</a> | 3.070346893 | 1.618402 | 8.82E-05 | 0.000448 |
| TMLHE        | <a href="#">113248335</a> | 3.066465787 | 1.616577 | 0.000237 | 0.001082 |
| GUCY1A2      | <a href="#">113260215</a> | 3.064568545 | 1.615684 | 0.004317 | 0.013677 |
| PLB1         | <a href="#">113267984</a> | 3.061448905 | 1.614215 | 0.011304 | 0.030966 |
| LOC113243636 | <a href="#">113243636</a> | 3.059412963 | 1.613255 | 5.29E-05 | 0.000282 |
| NDUFA7       | <a href="#">113242904</a> | 3.058628647 | 1.612885 | 3.51E-05 | 0.000194 |
| TMED1        | <a href="#">113243002</a> | 3.057609485 | 1.612404 | 7.91E-05 | 0.000406 |
| LYRM1        | <a href="#">113267537</a> | 3.056264922 | 1.61177  | 0.003377 | 0.011077 |
| ST3GAL3      | <a href="#">113254779</a> | 3.055638811 | 1.611474 | 1.61E-05 | 9.67E-05 |
| SCMH1        | <a href="#">113254820</a> | 3.053364966 | 1.6104   | 0.000228 | 0.001045 |
| USP25        | <a href="#">113244784</a> | 3.051220059 | 1.609386 | 2E-05    | 0.000117 |
| SORCS2       | <a href="#">113245719</a> | 3.049896892 | 1.60876  | 0.001735 | 0.006222 |
| GNG7         | <a href="#">113242789</a> | 3.049512409 | 1.608579 | 0.00028  | 0.001257 |
| MAP4K3       | <a href="#">113241667</a> | 3.04813507  | 1.607927 | 7.15E-06 | 4.67E-05 |
| PDGFB        | <a href="#">113241764</a> | 3.047850226 | 1.607792 | 0.001582 | 0.005755 |
| TRIAP1       | <a href="#">113267045</a> | 3.047335792 | 1.607548 | 2.77E-05 | 0.000157 |
| MTFR1L       | <a href="#">113268482</a> | 3.047187335 | 1.607478 | 5.44E-05 | 0.000289 |
| FSCN2        | <a href="#">113244518</a> | 3.046949897 | 1.607366 | 0.004356 | 0.013784 |
| CLDN5        | <a href="#">113245974</a> | 3.042604861 | 1.605307 | 0.001608 | 0.005828 |
| PSMG3        | <a href="#">113247741</a> | 3.040650957 | 1.60438  | 5.3E-05  | 0.000282 |
| OTUD4        | <a href="#">113255723</a> | 3.04010752  | 1.604122 | 5.45E-05 | 0.000289 |
| HADHA        | <a href="#">113270772</a> | 3.037818145 | 1.603036 | 0.005896 | 0.017965 |
| ARHGAP20     | <a href="#">113260078</a> | 3.036761746 | 1.602534 | 0.00105  | 0.004018 |
| CMC1         | <a href="#">113253855</a> | 3.03418237  | 1.601308 | 0.000117 | 0.000579 |
| FOXP3        | <a href="#">113265955</a> | 3.034167155 | 1.601301 | 0.002717 | 0.009185 |
| GABBR2       | <a href="#">113260410</a> | 3.033035157 | 1.600762 | 0.004718 | 0.014813 |
| SPATA25      | <a href="#">113258663</a> | 3.031651749 | 1.600104 | 0.004054 | 0.012959 |
| ISCU         | <a href="#">113267071</a> | 3.031013367 | 1.5998   | 0.001177 | 0.004438 |

|              |                           |             |          |          |          |
|--------------|---------------------------|-------------|----------|----------|----------|
| PARP3        | <a href="#">113256932</a> | 3.026914092 | 1.597848 | 0.01965  | 0.049571 |
| IL17RD       | <a href="#">113256999</a> | 3.026326726 | 1.597568 | 0.005218 | 0.016178 |
| KCNJ8        | <a href="#">113257805</a> | 3.026287878 | 1.597549 | 0.003619 | 0.011776 |
| EFCAB2       | <a href="#">113262948</a> | 3.021602339 | 1.595314 | 7.31E-05 | 0.000379 |
| MEOX2        | <a href="#">113260901</a> | 3.02123643  | 1.595139 | 0.002503 | 0.008555 |
| HS3ST2       | <a href="#">113267566</a> | 3.021017279 | 1.595034 | 0.001918 | 0.006776 |
| LOC113247899 | <a href="#">113247899</a> | 3.01898878  | 1.594065 | 0.000404 | 0.001738 |
| MVB12B       | <a href="#">113266416</a> | 3.017825097 | 1.593509 | 3.04E-05 | 0.00017  |
| CPT2         | <a href="#">113254653</a> | 3.010955135 | 1.590221 | 0.000871 | 0.003415 |
| TNFRSF9      | <a href="#">113270556</a> | 3.0090342   | 1.589301 | 0.000596 | 0.002449 |
| PATL1        | <a href="#">113248883</a> | 3.007148392 | 1.588396 | 3.04E-05 | 0.00017  |
| TMEM8B       | <a href="#">113260461</a> | 3.007100132 | 1.588373 | 0.000592 | 0.002438 |
| SGCG         | <a href="#">113251183</a> | 3.007094587 | 1.58837  | 0.015773 | 0.041262 |
| SLC7A6       | <a href="#">113252404</a> | 3.007052225 | 1.58835  | 7.14E-05 | 0.00037  |
| SHISA8       | <a href="#">113241716</a> | 3.006590546 | 1.588128 | 0.011706 | 0.031939 |
| N6AMT1       | <a href="#">113268381</a> | 3.004651186 | 1.587198 | 0.000104 | 0.000518 |
| TMEM147      | <a href="#">113244830</a> | 3.003625296 | 1.586705 | 0.00049  | 0.002062 |
| KCNJ16       | <a href="#">113265225</a> | 3.002202817 | 1.586021 | 0.005876 | 0.01792  |
| PEX5         | <a href="#">113257939</a> | 3.001294996 | 1.585585 | 7.73E-05 | 0.000397 |
| SDHAF3       | <a href="#">113260440</a> | 3.000598165 | 1.58525  | 0.000521 | 0.002176 |
| MRPL19       | <a href="#">113243374</a> | 2.997723905 | 1.583868 | 0.000378 | 0.001639 |
| IMPA2        | <a href="#">113245922</a> | 2.997096942 | 1.583566 | 3.14E-05 | 0.000175 |
| ANGPT4       | <a href="#">113258433</a> | 2.996431864 | 1.583246 | 0.000148 | 0.000711 |
| RGS11        | <a href="#">113245366</a> | 2.993369447 | 1.58177  | 0.003204 | 0.010593 |
| RPL30        | <a href="#">113252895</a> | 2.99263702  | 1.581417 | 0.019658 | 0.049573 |
| YAP1         | <a href="#">113259721</a> | 2.992505241 | 1.581354 | 0.000161 | 0.000769 |
| SELENOW      | <a href="#">113243361</a> | 2.990183274 | 1.580234 | 5.33E-05 | 0.000284 |
| PTOV1        | <a href="#">113243281</a> | 2.989402743 | 1.579857 | 0.000122 | 0.000599 |

|              |                           |             |          |          |          |
|--------------|---------------------------|-------------|----------|----------|----------|
| MNAT1        | <a href="#">113242407</a> | 2.98846362  | 1.579404 | 4.73E-05 | 0.000255 |
| DMAC2        | <a href="#">113243534</a> | 2.985978266 | 1.578204 | 4.45E-05 | 0.000241 |
| SNTA1        | <a href="#">113258493</a> | 2.978898336 | 1.574779 | 0.007595 | 0.02222  |
| LHFPL1       | <a href="#">113241246</a> | 2.977397011 | 1.574052 | 0.004399 | 0.013897 |
| ESAM         | <a href="#">113259915</a> | 2.973636336 | 1.572228 | 0.000103 | 0.000513 |
| CREB5        | <a href="#">113262153</a> | 2.971958151 | 1.571414 | 0.002347 | 0.008081 |
| NDUFV3       | <a href="#">113254594</a> | 2.97096868  | 1.570933 | 6.08E-05 | 0.00032  |
| ZNF532       | <a href="#">113253462</a> | 2.965553097 | 1.568301 | 2E-05    | 0.000117 |
| NDST1        | <a href="#">113263951</a> | 2.965256413 | 1.568157 | 3.91E-05 | 0.000214 |
| LOC113248316 | <a href="#">113248316</a> | 2.960585158 | 1.565882 | 0.000394 | 0.001698 |
| TRMT10C      | <a href="#">113250698</a> | 2.959536003 | 1.565371 | 0.000251 | 0.001138 |
| DNAJC21      | <a href="#">113260878</a> | 2.958566218 | 1.564898 | 2.44E-05 | 0.00014  |
| MRS2         | <a href="#">113264337</a> | 2.958544357 | 1.564888 | 0.001212 | 0.004558 |
| LOC113242682 | <a href="#">113242682</a> | 2.957615628 | 1.564435 | 0.004298 | 0.013627 |
| SMIM11A      | <a href="#">113262792</a> | 2.956998962 | 1.564134 | 8.48E-05 | 0.000432 |
| HEY1         | <a href="#">113253020</a> | 2.954742827 | 1.563033 | 0.000919 | 0.003576 |
| USP24        | <a href="#">113254622</a> | 2.954093942 | 1.562716 | 0.000761 | 0.003036 |
| SESN1        | <a href="#">113264757</a> | 2.950433559 | 1.560927 | 0.000187 | 0.000879 |
| MBNL2        | <a href="#">113251479</a> | 2.950423602 | 1.560922 | 0.004415 | 0.013945 |
| AFDN         | <a href="#">113247099</a> | 2.94858014  | 1.56002  | 0.000191 | 0.000892 |
| NOSTRIN      | <a href="#">113250810</a> | 2.947519223 | 1.559501 | 0.009267 | 0.026214 |
| KEAP1        | <a href="#">113242989</a> | 2.947263427 | 1.559376 | 0.000882 | 0.003448 |
| HYKK         | <a href="#">113263805</a> | 2.945437606 | 1.558482 | 0.003228 | 0.010653 |
| SLC3A1       | <a href="#">113246247</a> | 2.944148651 | 1.557851 | 0.000513 | 0.002148 |
| FTO          | <a href="#">113252242</a> | 2.9435233   | 1.557544 | 3.28E-05 | 0.000183 |
| SPRYD7       | <a href="#">113251311</a> | 2.94269936  | 1.55714  | 0.0003   | 0.001339 |
| DNPEP        | <a href="#">113250427</a> | 2.941216489 | 1.556413 | 9.72E-05 | 0.000489 |
| GARNL3       | <a href="#">113266425</a> | 2.940251845 | 1.55594  | 0.008053 | 0.023333 |

|              |                           |             |          |          |          |
|--------------|---------------------------|-------------|----------|----------|----------|
| MITF         | <a href="#">113257074</a> | 2.939075273 | 1.555362 | 0.000393 | 0.001694 |
| HSPA12B      | <a href="#">113258381</a> | 2.936236129 | 1.553968 | 0.000656 | 0.002668 |
| GFRA1        | <a href="#">113251969</a> | 2.935761494 | 1.553735 | 0.00528  | 0.016329 |
| DNAJA4       | <a href="#">113263798</a> | 2.93492034  | 1.553321 | 9.03E-05 | 0.000457 |
| L3MBTL3      | <a href="#">113259438</a> | 2.934605628 | 1.553167 | 8E-05    | 0.00041  |
| ATP5PO       | <a href="#">113263260</a> | 2.93403816  | 1.552888 | 0.004122 | 0.013145 |
| LARP1B       | <a href="#">113255656</a> | 2.931840068 | 1.551806 | 3.52E-05 | 0.000195 |
| CHCHD1       | <a href="#">113259188</a> | 2.927282865 | 1.549562 | 0.000169 | 0.000801 |
| KYAT1        | <a href="#">113266490</a> | 2.923363805 | 1.547629 | 0.005628 | 0.017245 |
| LOC113242946 | <a href="#">113242946</a> | 2.919496922 | 1.54572  | 0.011755 | 0.032052 |
| KLHDC8B      | <a href="#">113256866</a> | 2.919411931 | 1.545678 | 0.00731  | 0.02149  |
| CCDC68       | <a href="#">113253439</a> | 2.918585813 | 1.545269 | 0.003667 | 0.011892 |
| LRRC3B       | <a href="#">113253861</a> | 2.918402612 | 1.545179 | 0.003737 | 0.012089 |
| THRA         | <a href="#">113265499</a> | 2.918082629 | 1.545021 | 0.00027  | 0.001217 |
| BTBD6        | <a href="#">113267181</a> | 2.917702393 | 1.544833 | 0.001323 | 0.004922 |
| LRRC4        | <a href="#">113263735</a> | 2.917198147 | 1.544583 | 0.001806 | 0.006441 |
| PHLDB2       | <a href="#">113251155</a> | 2.913497426 | 1.542752 | 0.000246 | 0.001119 |
| LOC113241998 | <a href="#">113241998</a> | 2.913488195 | 1.542747 | 0.000583 | 0.002408 |
| ADAMTSL1     | <a href="#">113260599</a> | 2.911099064 | 1.541564 | 0.001197 | 0.004504 |
| MTIF3        | <a href="#">113251204</a> | 2.910563068 | 1.541298 | 7.93E-05 | 0.000406 |
| USHBP1       | <a href="#">113256668</a> | 2.910311631 | 1.541174 | 0.001122 | 0.004256 |
| SMIM10L1     | <a href="#">113257883</a> | 2.907503736 | 1.539781 | 9.69E-05 | 0.000488 |
| PPP2R2D      | <a href="#">113252071</a> | 2.903817087 | 1.537951 | 0.000311 | 0.001381 |
| ZNF583       | <a href="#">113248544</a> | 2.900189723 | 1.536147 | 0.002551 | 0.008693 |
| TLE2         | <a href="#">113242769</a> | 2.898648816 | 1.535381 | 0.000139 | 0.000671 |
| NAXE         | <a href="#">113245227</a> | 2.8983189   | 1.535216 | 0.000183 | 0.000864 |
| TMEM126A     | <a href="#">113269391</a> | 2.896920576 | 1.53452  | 0.000331 | 0.001457 |
| LOC113245455 | <a href="#">113245455</a> | 2.895314031 | 1.53372  | 2.87E-05 | 0.000162 |

|              |                           |             |          |          |          |
|--------------|---------------------------|-------------|----------|----------|----------|
| DUSP10       | <a href="#">113268713</a> | 2.894576679 | 1.533352 | 0.000147 | 0.000708 |
| ASPSCR1      | <a href="#">113244489</a> | 2.894098945 | 1.533114 | 0.001354 | 0.005019 |
| MTMR11       | <a href="#">113246122</a> | 2.89183422  | 1.531985 | 0.007635 | 0.022299 |
| AES          | <a href="#">113242788</a> | 2.890980216 | 1.531559 | 0.001257 | 0.004707 |
| LOC113265650 | <a href="#">113265650</a> | 2.889994747 | 1.531067 | 0.000199 | 0.000926 |
| APBB1        | <a href="#">113245850</a> | 2.888588584 | 1.530365 | 0.000398 | 0.001717 |
| SDHC         | <a href="#">113246688</a> | 2.888194773 | 1.530168 | 0.00285  | 0.00957  |
| KIF21A       | <a href="#">113257734</a> | 2.887569514 | 1.529856 | 0.001807 | 0.006444 |
| VPS9D1       | <a href="#">113252123</a> | 2.887557279 | 1.52985  | 0.000117 | 0.000579 |
| LOC113249791 | <a href="#">113249791</a> | 2.88730854  | 1.529725 | 0.004843 | 0.015169 |
| FST          | <a href="#">113263911</a> | 2.884834234 | 1.528488 | 0.008711 | 0.02488  |
| USP11        | <a href="#">113265969</a> | 2.883876225 | 1.528009 | 0.000546 | 0.002268 |
| OSBPL1A      | <a href="#">113253295</a> | 2.883243946 | 1.527693 | 0.001308 | 0.004874 |
| KDM4D        | <a href="#">113260162</a> | 2.88169687  | 1.526919 | 0.006911 | 0.020475 |
| PVR          | <a href="#">113243460</a> | 2.879585564 | 1.525861 | 0.001149 | 0.00435  |
| SLC47A2      | <a href="#">113271269</a> | 2.8791563   | 1.525646 | 0.008818 | 0.025143 |
| PSMG4        | <a href="#">113264402</a> | 2.877491927 | 1.524812 | 0.003848 | 0.012393 |
| PDCD5        | <a href="#">113244718</a> | 2.877340909 | 1.524736 | 0.000266 | 0.001198 |
| CLYBL        | <a href="#">113251501</a> | 2.877097215 | 1.524614 | 0.000728 | 0.002919 |
| THNSL2       | <a href="#">113242812</a> | 2.875942421 | 1.524035 | 0.00016  | 0.000763 |
| FRS3         | <a href="#">113261310</a> | 2.875317562 | 1.523721 | 0.000592 | 0.002436 |
| CPED1        | <a href="#">113263459</a> | 2.875250734 | 1.523688 | 0.001445 | 0.005315 |
| LOC113245523 | <a href="#">113245523</a> | 2.874889968 | 1.523507 | 0.000565 | 0.002337 |
| LOC113248542 | <a href="#">113248542</a> | 2.872694052 | 1.522404 | 0.001833 | 0.006522 |
| USH1C        | <a href="#">113246620</a> | 2.870756202 | 1.521431 | 0.008655 | 0.024745 |
| DUSP23       | <a href="#">113246655</a> | 2.869531271 | 1.520815 | 0.000873 | 0.003419 |
| ACP2         | <a href="#">113264970</a> | 2.869230846 | 1.520664 | 0.000158 | 0.000755 |
| KAT5         | <a href="#">113244098</a> | 2.868804899 | 1.52045  | 0.000119 | 0.000584 |

|              |                           |             |          |          |          |
|--------------|---------------------------|-------------|----------|----------|----------|
| ZFP92        | <a href="#">113247841</a> | 2.867292399 | 1.519689 | 0.008112 | 0.023467 |
| PYROXD2      | <a href="#">113251809</a> | 2.866435352 | 1.519258 | 0.005347 | 0.016519 |
| RTL10        | <a href="#">113245950</a> | 2.866365346 | 1.519223 | 0.001351 | 0.005013 |
| GATA6        | <a href="#">113253276</a> | 2.864077732 | 1.518071 | 0.012175 | 0.033026 |
| USP53        | <a href="#">113255610</a> | 2.862461563 | 1.517256 | 0.000126 | 0.000618 |
| MAB21L1      | <a href="#">113251254</a> | 2.8597858   | 1.515907 | 0.009872 | 0.027617 |
| DENND1B      | <a href="#">113242587</a> | 2.859505159 | 1.515766 | 0.001617 | 0.005857 |
| LRIG1        | <a href="#">113257056</a> | 2.858371338 | 1.515193 | 0.00987  | 0.027617 |
| DEAF1        | <a href="#">113248806</a> | 2.857667686 | 1.514838 | 8.56E-05 | 0.000436 |
| PRMT1        | <a href="#">113243287</a> | 2.856683873 | 1.514341 | 9.24E-05 | 0.000466 |
| RFK          | <a href="#">113269838</a> | 2.855092535 | 1.513538 | 0.000113 | 0.000559 |
| ATP5IF1      | <a href="#">113268421</a> | 2.852917366 | 1.512438 | 0.002292 | 0.007929 |
| ZNF662       | <a href="#">113253831</a> | 2.849905462 | 1.510914 | 0.001017 | 0.00391  |
| IARS2        | <a href="#">113268724</a> | 2.849463381 | 1.51069  | 0.000836 | 0.0033   |
| SERTAD4      | <a href="#">113262655</a> | 2.848330683 | 1.510117 | 0.019824 | 0.049863 |
| SMYD2        | <a href="#">113262691</a> | 2.848065215 | 1.509982 | 8.94E-05 | 0.000453 |
| LOC113248302 | <a href="#">113248302</a> | 2.845539536 | 1.508702 | 0.000848 | 0.00334  |
| STUB1        | <a href="#">113245397</a> | 2.844908975 | 1.508382 | 0.000667 | 0.002704 |
| PACS2        | <a href="#">113267179</a> | 2.839461873 | 1.505618 | 0.000345 | 0.001511 |
| UBXN1        | <a href="#">113246911</a> | 2.838427217 | 1.505092 | 0.000201 | 0.000936 |
| THAP12       | <a href="#">113269339</a> | 2.838329417 | 1.505042 | 0.000511 | 0.002142 |
| RAB40B       | <a href="#">113244465</a> | 2.83753057  | 1.504636 | 0.005138 | 0.015963 |
| ABLIM3       | <a href="#">113263929</a> | 2.833253489 | 1.50246  | 0.008185 | 0.023616 |
| EIF4E3       | <a href="#">113257082</a> | 2.831513015 | 1.501573 | 0.000257 | 0.001164 |
| PALM         | <a href="#">113242702</a> | 2.831354661 | 1.501492 | 0.004201 | 0.013364 |
| HMGCLL1      | <a href="#">113261167</a> | 2.830764188 | 1.501192 | 0.009027 | 0.025627 |
| CXCL14       | <a href="#">113261492</a> | 2.826119282 | 1.498822 | 0.0006   | 0.002464 |
| FOXO4        | <a href="#">113245656</a> | 2.825672457 | 1.498594 | 9.44E-05 | 0.000476 |

|              |                           |             |          |          |          |
|--------------|---------------------------|-------------|----------|----------|----------|
| NUDT6        | <a href="#">113255639</a> | 2.823321547 | 1.497393 | 0.000174 | 0.000823 |
| SLC43A1      | <a href="#">113246534</a> | 2.819761773 | 1.495573 | 7.82E-05 | 0.000401 |
| SAR1B        | <a href="#">113261745</a> | 2.817270929 | 1.494298 | 0.001116 | 0.004234 |
| TIMM13       | <a href="#">113242767</a> | 2.816740185 | 1.494026 | 0.000191 | 0.000894 |
| COQ3         | <a href="#">113264805</a> | 2.816310879 | 1.493807 | 0.000366 | 0.001594 |
| CFAP58       | <a href="#">113251623</a> | 2.813905165 | 1.492574 | 0.003322 | 0.010932 |
| NOD1         | <a href="#">113262332</a> | 2.81337358  | 1.492301 | 5.25E-05 | 0.000281 |
| POLR1E       | <a href="#">113260444</a> | 2.81193223  | 1.491562 | 6.06E-05 | 0.00032  |
| LOC113246836 | <a href="#">113246836</a> | 2.811013111 | 1.49109  | 0.007408 | 0.021724 |
| ITGB8        | <a href="#">113261164</a> | 2.810524774 | 1.49084  | 0.007735 | 0.022547 |
| FBXL17       | <a href="#">113255014</a> | 2.806189301 | 1.488612 | 4.15E-05 | 0.000225 |
| NKIRAS1      | <a href="#">113253873</a> | 2.804711617 | 1.487852 | 0.001512 | 0.005535 |
| OPN1SW       | <a href="#">113263870</a> | 2.804583554 | 1.487787 | 0.008516 | 0.024405 |
| FKRP         | <a href="#">113243391</a> | 2.802230364 | 1.486576 | 6.49E-05 | 0.000339 |
| LURAP1       | <a href="#">113254728</a> | 2.801988129 | 1.486451 | 0.005938 | 0.018069 |
| RPS28        | <a href="#">113242905</a> | 2.801091137 | 1.485989 | 0.008745 | 0.024959 |
| DCXR         | <a href="#">113244486</a> | 2.800603058 | 1.485738 | 0.000935 | 0.003633 |
| GCSH         | <a href="#">113252527</a> | 2.800183062 | 1.485521 | 0.003667 | 0.011892 |
| LRPPRC       | <a href="#">113246283</a> | 2.800156925 | 1.485508 | 0.003626 | 0.011793 |
| FIBIN        | <a href="#">113265095</a> | 2.79973605  | 1.485291 | 0.0028   | 0.009438 |
| CCSER2       | <a href="#">113259236</a> | 2.799554721 | 1.485197 | 0.000737 | 0.002953 |
| PSEN2        | <a href="#">113262931</a> | 2.795198781 | 1.482951 | 5.56E-05 | 0.000295 |
| NFIB         | <a href="#">113260613</a> | 2.795157034 | 1.482929 | 0.003377 | 0.011077 |
| EIF2A        | <a href="#">113254058</a> | 2.794226593 | 1.482449 | 0.000892 | 0.003486 |
| HTR1B        | <a href="#">113261102</a> | 2.793797258 | 1.482227 | 0.018017 | 0.046033 |
| SHANK3       | <a href="#">113241594</a> | 2.79354764  | 1.482098 | 0.000203 | 0.000941 |
| SLC39A2      | <a href="#">113248487</a> | 2.790749426 | 1.480653 | 0.006009 | 0.018262 |
| MARS2        | <a href="#">113250623</a> | 2.789786053 | 1.480154 | 0.000561 | 0.002323 |

|              |                           |             |          |          |          |
|--------------|---------------------------|-------------|----------|----------|----------|
| STARD7       | <a href="#">113241969</a> | 2.789785696 | 1.480154 | 0.002021 | 0.007094 |
| LSM14B       | <a href="#">113258785</a> | 2.789705375 | 1.480113 | 2.93E-05 | 0.000165 |
| TIMM8B       | <a href="#">113260055</a> | 2.788768646 | 1.479628 | 0.000281 | 0.001259 |
| PGP          | <a href="#">113245113</a> | 2.787390235 | 1.478915 | 0.000244 | 0.001112 |
| SYNGR2       | <a href="#">113244572</a> | 2.786576912 | 1.478494 | 0.000808 | 0.003198 |
| SOX8         | <a href="#">113245394</a> | 2.786111226 | 1.478253 | 0.005526 | 0.016982 |
| RDH5         | <a href="#">113256460</a> | 2.786091712 | 1.478243 | 0.006679 | 0.019937 |
| ZCCHC24      | <a href="#">113259220</a> | 2.785344893 | 1.477856 | 0.000496 | 0.002083 |
| MTUS1        | <a href="#">113262156</a> | 2.785128402 | 1.477744 | 0.007893 | 0.022948 |
| MRPL34       | <a href="#">113256673</a> | 2.776683984 | 1.473363 | 0.000734 | 0.002944 |
| PSMC3        | <a href="#">113264959</a> | 2.776673875 | 1.473358 | 0.000691 | 0.002791 |
| CUNH11orf94  | <a href="#">113264998</a> | 2.775642318 | 1.472822 | 0.012065 | 0.032766 |
| PPP1R14B     | <a href="#">113244179</a> | 2.77503988  | 1.472509 | 0.000957 | 0.003706 |
| MRPL11       | <a href="#">113244065</a> | 2.774259528 | 1.472103 | 0.000456 | 0.001929 |
| ZNHIT2       | <a href="#">113244132</a> | 2.773840008 | 1.471885 | 0.000182 | 0.000858 |
| ABCC2        | <a href="#">113251819</a> | 2.773251518 | 1.471578 | 0.005678 | 0.017384 |
| ARHGEF15     | <a href="#">113271183</a> | 2.772692735 | 1.471288 | 0.000658 | 0.002674 |
| AKT1S1       | <a href="#">113243278</a> | 2.770359677 | 1.470073 | 0.00129  | 0.004812 |
| LOC113257828 | <a href="#">113257828</a> | 2.769482881 | 1.469617 | 0.000444 | 0.001884 |
| SNRPN        | <a href="#">113263595</a> | 2.767657817 | 1.468666 | 0.002025 | 0.007106 |
| KLF2         | <a href="#">113256645</a> | 2.766123411 | 1.467866 | 0.000154 | 0.000738 |
| ACVR2A       | <a href="#">113250906</a> | 2.765061207 | 1.467311 | 0.001976 | 0.006956 |
| LOC113249995 | <a href="#">113249995</a> | 2.764735173 | 1.467141 | 0.004745 | 0.014883 |
| ANKRD53      | <a href="#">113244188</a> | 2.763558236 | 1.466527 | 0.00486  | 0.015196 |
| NTAN1        | <a href="#">113270768</a> | 2.76154135  | 1.465474 | 0.000363 | 0.001578 |
| TMEM94       | <a href="#">113244634</a> | 2.760900033 | 1.465139 | 5.41E-05 | 0.000287 |
| GATC         | <a href="#">113267042</a> | 2.760692971 | 1.46503  | 0.000374 | 0.001624 |
| HSD17B8      | <a href="#">113243793</a> | 2.759606558 | 1.464463 | 0.000187 | 0.000876 |

|              |                           |             |          |          |          |
|--------------|---------------------------|-------------|----------|----------|----------|
| RRM2B        | <a href="#">113252861</a> | 2.753958932 | 1.461507 | 0.000329 | 0.001451 |
| ELOB         | <a href="#">113245416</a> | 2.753279535 | 1.461151 | 0.000686 | 0.002772 |
| APPL2        | <a href="#">113256053</a> | 2.750749363 | 1.459825 | 0.001015 | 0.003902 |
| SNRNP25      | <a href="#">113245172</a> | 2.749923821 | 1.459392 | 0.000121 | 0.000596 |
| ZNF365       | <a href="#">113259088</a> | 2.748556723 | 1.458674 | 0.0031   | 0.010285 |
| LOC113242771 | <a href="#">113242771</a> | 2.747428928 | 1.458082 | 0.004071 | 0.013003 |
| ETV7         | <a href="#">113243859</a> | 2.746515693 | 1.457603 | 0.018037 | 0.046076 |
| RASD1        | <a href="#">113271303</a> | 2.746160388 | 1.457416 | 0.001874 | 0.006645 |
| ISPD         | <a href="#">113260950</a> | 2.746087227 | 1.457377 | 0.004381 | 0.013849 |
| LOC113247766 | <a href="#">113247766</a> | 2.744715613 | 1.456657 | 0.004263 | 0.013538 |
| NKAPL        | <a href="#">113248162</a> | 2.744366229 | 1.456473 | 0.013088 | 0.035144 |
| MRPS16       | <a href="#">113259173</a> | 2.743139757 | 1.455828 | 0.000123 | 0.000601 |
| GPRASP1      | <a href="#">113244313</a> | 2.742820733 | 1.45566  | 0.014852 | 0.039145 |
| ZNF25        | <a href="#">113258958</a> | 2.741605915 | 1.455021 | 0.00039  | 0.001686 |
| LOC113252203 | <a href="#">113252203</a> | 2.740667593 | 1.454527 | 0.000285 | 0.001276 |
| CD99L2       | <a href="#">113246822</a> | 2.73968058  | 1.454008 | 0.002996 | 0.010008 |
| CX3CL1       | <a href="#">113252283</a> | 2.739317228 | 1.453816 | 0.007124 | 0.021028 |
| TRIM3        | <a href="#">113245858</a> | 2.737538772 | 1.452879 | 0.002452 | 0.008404 |
| LOC113245502 | <a href="#">113245502</a> | 2.737483985 | 1.452851 | 0.000184 | 0.000865 |
| SEMA6A       | <a href="#">113261619</a> | 2.734838206 | 1.451455 | 0.000199 | 0.000926 |
| METAP1       | <a href="#">113263122</a> | 2.733324154 | 1.450657 | 0.000323 | 0.001427 |
| HABP4        | <a href="#">113269773</a> | 2.728440448 | 1.448077 | 0.000495 | 0.002083 |
| SMTN         | <a href="#">113245049</a> | 2.7277959   | 1.447736 | 0.000224 | 0.001031 |
| S100A13      | <a href="#">113245338</a> | 2.724239579 | 1.445854 | 0.000407 | 0.001748 |
| VMO1         | <a href="#">113271087</a> | 2.723303807 | 1.445358 | 0.017753 | 0.045462 |
| NAT14        | <a href="#">113247427</a> | 2.722950948 | 1.445171 | 0.008305 | 0.023896 |
| MARCH9       | <a href="#">113256359</a> | 2.720545463 | 1.443896 | 0.000845 | 0.003327 |
| DRG2         | <a href="#">113271293</a> | 2.719660812 | 1.443427 | 0.000101 | 0.000504 |

|              |                           |             |          |          |          |
|--------------|---------------------------|-------------|----------|----------|----------|
| LOC113250465 | <a href="#">113250465</a> | 2.716306518 | 1.441646 | 0.000369 | 0.001602 |
| PDLIM1       | <a href="#">113251752</a> | 2.714350661 | 1.440607 | 0.001248 | 0.004676 |
| ENPP5        | <a href="#">113261237</a> | 2.713108734 | 1.439947 | 0.000356 | 0.001553 |
| HUS1         | <a href="#">113257638</a> | 2.710556982 | 1.438589 | 0.000861 | 0.003385 |
| MLH3         | <a href="#">113270322</a> | 2.710137689 | 1.438366 | 0.000737 | 0.002952 |
| SH3BP4       | <a href="#">113250314</a> | 2.707829001 | 1.437137 | 0.002206 | 0.007671 |
| BANF1        | <a href="#">113244083</a> | 2.704376322 | 1.435296 | 0.000347 | 0.001516 |
| POLR2M       | <a href="#">113269673</a> | 2.704156344 | 1.435179 | 0.000427 | 0.001819 |
| LOC113244925 | <a href="#">113244925</a> | 2.703696669 | 1.434933 | 0.000168 | 0.000797 |
| PCYT1A       | <a href="#">113252916</a> | 2.701390734 | 1.433702 | 0.000203 | 0.000942 |
| LOC113246337 | <a href="#">113246337</a> | 2.700568588 | 1.433263 | 0.001753 | 0.006275 |
| NINJ2        | <a href="#">113258034</a> | 2.700170122 | 1.43305  | 0.010105 | 0.028151 |
| CIAO2B       | <a href="#">113252339</a> | 2.700167581 | 1.433049 | 0.000227 | 0.001042 |
| MOB2         | <a href="#">113243948</a> | 2.696608749 | 1.431146 | 0.000262 | 0.001182 |
| SELENOK      | <a href="#">113256985</a> | 2.696058847 | 1.430852 | 0.000332 | 0.001459 |
| CD59         | <a href="#">113265058</a> | 2.6940546   | 1.429779 | 0.007293 | 0.021452 |
| FER1L6       | <a href="#">113252749</a> | 2.691273961 | 1.428289 | 0.008612 | 0.024644 |
| ETFBKMT      | <a href="#">113257750</a> | 2.690743813 | 1.428005 | 0.002052 | 0.007193 |
| SYP          | <a href="#">113265951</a> | 2.690571135 | 1.427912 | 0.006351 | 0.019124 |
| ADGRF5       | <a href="#">113261229</a> | 2.690265488 | 1.427749 | 0.009159 | 0.025949 |
| POMGNT2      | <a href="#">113253834</a> | 2.688880252 | 1.427006 | 0.013858 | 0.036857 |
| ZADH2        | <a href="#">113253530</a> | 2.688598982 | 1.426855 | 0.000411 | 0.00176  |
| MRPS18C      | <a href="#">113263198</a> | 2.688381423 | 1.426738 | 0.000259 | 0.001171 |
| OXSM         | <a href="#">113253864</a> | 2.687339432 | 1.426179 | 0.000595 | 0.002449 |
| SLC25A25     | <a href="#">113266451</a> | 2.684895286 | 1.424866 | 0.001313 | 0.004892 |
| DLAT         | <a href="#">113260048</a> | 2.684746162 | 1.424786 | 0.00604  | 0.018341 |
| IKZF4        | <a href="#">113256443</a> | 2.684239857 | 1.424514 | 0.000736 | 0.002952 |
| LOC113261535 | <a href="#">113261535</a> | 2.683102833 | 1.423902 | 0.00159  | 0.005779 |

|              |                           |             |          |          |          |
|--------------|---------------------------|-------------|----------|----------|----------|
| GJA5         | <a href="#">113247790</a> | 2.681869164 | 1.423239 | 0.001486 | 0.00545  |
| ARHGEF25     | <a href="#">113256370</a> | 2.681421871 | 1.422998 | 0.0071   | 0.020977 |
| WDR77        | <a href="#">113244430</a> | 2.680997402 | 1.42277  | 0.000306 | 0.001363 |
| GADD45G      | <a href="#">113270128</a> | 2.679192922 | 1.421798 | 0.00133  | 0.004939 |
| EEF2K        | <a href="#">113267554</a> | 2.678286548 | 1.42131  | 0.000217 | 0.001002 |
| ETS2         | <a href="#">113258013</a> | 2.6782852   | 1.42131  | 0.000166 | 0.000791 |
| MTHFR        | <a href="#">113270501</a> | 2.675957982 | 1.420055 | 0.000304 | 0.001353 |
| LOC113251149 | <a href="#">113251149</a> | 2.675435402 | 1.419774 | 0.01477  | 0.038954 |
| DCAF8        | <a href="#">113246657</a> | 2.674621904 | 1.419335 | 0.002685 | 0.009097 |
| HSD17B1      | <a href="#">113265419</a> | 2.672667376 | 1.41828  | 0.006869 | 0.020374 |
| ECHS1        | <a href="#">113252096</a> | 2.672265184 | 1.418063 | 0.005707 | 0.017459 |
| TIMMDC1      | <a href="#">113251876</a> | 2.670442157 | 1.417079 | 0.000789 | 0.003131 |
| ARAF         | <a href="#">113265980</a> | 2.669560783 | 1.416602 | 0.000345 | 0.00151  |
| ZAN          | <a href="#">113267522</a> | 2.668748636 | 1.416163 | 0.007909 | 0.022982 |
| ZNF846       | <a href="#">113242959</a> | 2.668407801 | 1.415979 | 0.012227 | 0.033127 |
| CUNH2orf92   | <a href="#">113246726</a> | 2.668304856 | 1.415924 | 0.008497 | 0.024358 |
| ANKRD33      | <a href="#">113257597</a> | 2.667899432 | 1.415704 | 0.010456 | 0.028983 |
| ZNF485       | <a href="#">113243138</a> | 2.667578834 | 1.415531 | 0.00499  | 0.015564 |
| DBP          | <a href="#">113243343</a> | 2.666944995 | 1.415188 | 0.003776 | 0.012205 |
| CUNH19orf54  | <a href="#">113243556</a> | 2.666436593 | 1.414913 | 0.002747 | 0.009279 |
| TOM1L2       | <a href="#">113271297</a> | 2.666237522 | 1.414805 | 0.00025  | 0.001137 |
| LOC113245461 | <a href="#">113245461</a> | 2.664981594 | 1.414126 | 0.002314 | 0.007989 |
| TPPP         | <a href="#">113260777</a> | 2.663682692 | 1.413422 | 0.004333 | 0.013718 |
| CAPZA2       | <a href="#">113263223</a> | 2.663376944 | 1.413257 | 0.001727 | 0.006193 |
| AVPR2        | <a href="#">113247864</a> | 2.662167697 | 1.412601 | 0.017666 | 0.045297 |
| DYNLL2       | <a href="#">113268866</a> | 2.659436383 | 1.411121 | 0.000945 | 0.003666 |
| STRN3        | <a href="#">113266095</a> | 2.658935892 | 1.410849 | 0.000176 | 0.000833 |
| EXOSC9       | <a href="#">113255628</a> | 2.658911862 | 1.410836 | 0.000205 | 0.000953 |

|              |                           |             |          |          |          |
|--------------|---------------------------|-------------|----------|----------|----------|
| LGR4         | <a href="#">113265090</a> | 2.658684374 | 1.410713 | 0.000457 | 0.00193  |
| UBE2E3       | <a href="#">113250703</a> | 2.658364414 | 1.410539 | 0.000183 | 0.000864 |
| CASKIN2      | <a href="#">113244635</a> | 2.657993432 | 1.410338 | 0.000341 | 0.001495 |
| HOXA9        | <a href="#">113262053</a> | 2.657003399 | 1.4098   | 0.000771 | 0.003071 |
| CILP         | <a href="#">113240867</a> | 2.655169709 | 1.408804 | 0.014119 | 0.037475 |
| MET          | <a href="#">113263211</a> | 2.649262943 | 1.405591 | 0.005247 | 0.016251 |
| DNAJA3       | <a href="#">113270848</a> | 2.648236619 | 1.405032 | 0.000409 | 0.001754 |
| CCDC121      | <a href="#">113271301</a> | 2.646730635 | 1.404211 | 0.001098 | 0.004174 |
| LOC113248539 | <a href="#">113248539</a> | 2.646360422 | 1.40401  | 0.000385 | 0.001666 |
| ITGA7        | <a href="#">113256462</a> | 2.645579995 | 1.403584 | 0.016156 | 0.042037 |
| RUFY3        | <a href="#">113263301</a> | 2.645358128 | 1.403463 | 0.000282 | 0.001266 |
| KIAA1107     | <a href="#">113254412</a> | 2.643513275 | 1.402457 | 0.000533 | 0.002217 |
| ZNF134       | <a href="#">113247987</a> | 2.640180258 | 1.400636 | 0.000225 | 0.001034 |
| ACYP1        | <a href="#">113270321</a> | 2.640123852 | 1.400606 | 0.001947 | 0.006864 |
| ARHGEF7      | <a href="#">113248529</a> | 2.635871142 | 1.39828  | 0.000365 | 0.001587 |
| PGAM5        | <a href="#">113266837</a> | 2.634784311 | 1.397685 | 0.000139 | 0.000673 |
| FAM135A      | <a href="#">113261136</a> | 2.632566089 | 1.39647  | 0.000527 | 0.002196 |
| CDH15        | <a href="#">113252138</a> | 2.629044551 | 1.394539 | 0.01354  | 0.036128 |
| LOC113253631 | <a href="#">113253631</a> | 2.628706105 | 1.394353 | 0.009331 | 0.026357 |
| POLM         | <a href="#">113257880</a> | 2.627902792 | 1.393912 | 0.009514 | 0.026792 |
| EPHX4        | <a href="#">113254413</a> | 2.626481904 | 1.393132 | 0.017802 | 0.04556  |
| LOC113262545 | <a href="#">113262545</a> | 2.626332169 | 1.393049 | 0.000514 | 0.002149 |
| ATP6V1FNB    | <a href="#">113263980</a> | 2.625485498 | 1.392584 | 0.011994 | 0.032626 |
| POLR3C       | <a href="#">113247755</a> | 2.62503039  | 1.392334 | 0.000749 | 0.002994 |
| SDHAF1       | <a href="#">113244838</a> | 2.624640219 | 1.39212  | 0.002306 | 0.007965 |
| SLX4         | <a href="#">113270863</a> | 2.622966178 | 1.391199 | 0.000533 | 0.002217 |
| RABEP1       | <a href="#">113271062</a> | 2.621750844 | 1.390531 | 0.000227 | 0.001042 |
| TESK1        | <a href="#">113260478</a> | 2.620448478 | 1.389814 | 0.000426 | 0.001818 |

|              |                           |             |          |          |          |
|--------------|---------------------------|-------------|----------|----------|----------|
| ISLR2        | <a href="#">113240958</a> | 2.618798424 | 1.388905 | 0.007874 | 0.022909 |
| ECSCR        | <a href="#">113261806</a> | 2.618048231 | 1.388492 | 0.002695 | 0.009128 |
| CUNH16orf89  | <a href="#">113270825</a> | 2.617842651 | 1.388378 | 0.019062 | 0.048323 |
| ARHGEF28     | <a href="#">113255216</a> | 2.615795411 | 1.38725  | 0.007231 | 0.021293 |
| ST8SIA5      | <a href="#">113253380</a> | 2.615175501 | 1.386908 | 0.002025 | 0.007106 |
| EMC9         | <a href="#">113246088</a> | 2.614557513 | 1.386567 | 0.00092  | 0.003577 |
| SETD3        | <a href="#">113267284</a> | 2.611390372 | 1.384818 | 0.000328 | 0.001449 |
| DIPK2B       | <a href="#">113265908</a> | 2.611369114 | 1.384806 | 0.003603 | 0.011731 |
| UACA         | <a href="#">113240926</a> | 2.61014728  | 1.384131 | 0.000617 | 0.002527 |
| NELL2        | <a href="#">113257712</a> | 2.609464431 | 1.383754 | 0.01239  | 0.033516 |
| LNX1         | <a href="#">113262494</a> | 2.608234369 | 1.383074 | 0.000426 | 0.001818 |
| NDUFAF1      | <a href="#">113242009</a> | 2.607483368 | 1.382658 | 0.001123 | 0.00426  |
| ZC2HC1A      | <a href="#">113253024</a> | 2.607145311 | 1.382471 | 0.007711 | 0.022488 |
| BCKDK        | <a href="#">113267717</a> | 2.60631585  | 1.382012 | 0.0009   | 0.003513 |
| ALS2         | <a href="#">113250585</a> | 2.602743323 | 1.380033 | 0.000497 | 0.002087 |
| RHOD         | <a href="#">113244042</a> | 2.599590842 | 1.378285 | 0.009806 | 0.027476 |
| MRPL36       | <a href="#">113260792</a> | 2.599500271 | 1.378234 | 0.001909 | 0.006751 |
| LOC113270508 | <a href="#">113270508</a> | 2.599294154 | 1.37812  | 0.013765 | 0.036622 |
| GPT          | <a href="#">113247624</a> | 2.598829924 | 1.377862 | 0.006454 | 0.019389 |
| FRY          | <a href="#">113251237</a> | 2.598054688 | 1.377432 | 0.000553 | 0.002292 |
| VTN          | <a href="#">113269030</a> | 2.597344376 | 1.377037 | 0.002075 | 0.00726  |
| DIXDC1       | <a href="#">113260059</a> | 2.597285198 | 1.377004 | 0.0019   | 0.006725 |
| ZNF142       | <a href="#">113250451</a> | 2.596902833 | 1.376792 | 0.001026 | 0.00394  |
| PDE4A        | <a href="#">113242988</a> | 2.596365837 | 1.376494 | 0.00323  | 0.010657 |
| MESP1        | <a href="#">113263697</a> | 2.594481606 | 1.375446 | 0.010024 | 0.027955 |
| LOC113254720 | <a href="#">113254720</a> | 2.594398478 | 1.3754   | 0.005026 | 0.015657 |
| AGPAT5       | <a href="#">113262188</a> | 2.592372217 | 1.374273 | 0.000608 | 0.002494 |
| MRPS35       | <a href="#">113257772</a> | 2.591817118 | 1.373964 | 0.001619 | 0.00586  |

|              |                           |             |          |          |          |
|--------------|---------------------------|-------------|----------|----------|----------|
| MB21D2       | <a href="#">113253491</a> | 2.588293952 | 1.372001 | 0.015779 | 0.04127  |
| MSRB2        | <a href="#">113241336</a> | 2.587988228 | 1.371831 | 0.005347 | 0.016519 |
| ALDH1A3      | <a href="#">113263632</a> | 2.585569228 | 1.370482 | 0.001044 | 0.003995 |
| AP4S1        | <a href="#">113266097</a> | 2.584333853 | 1.369792 | 0.002109 | 0.00737  |
| ABI2         | <a href="#">113250562</a> | 2.580843651 | 1.367843 | 0.000855 | 0.003365 |
| PLCE1        | <a href="#">113243183</a> | 2.580535756 | 1.367671 | 0.001177 | 0.004438 |
| CCDC85B      | <a href="#">113244087</a> | 2.580446554 | 1.367621 | 0.000491 | 0.002066 |
| HYPK         | <a href="#">113241956</a> | 2.577598414 | 1.366028 | 0.000408 | 0.001753 |
| BRMS1L       | <a href="#">113266134</a> | 2.577378006 | 1.365904 | 0.000739 | 0.002959 |
| CUL3         | <a href="#">113250393</a> | 2.575699561 | 1.364964 | 0.001435 | 0.005281 |
| DLST         | <a href="#">113270325</a> | 2.571926828 | 1.36285  | 0.005233 | 0.016214 |
| INKA2        | <a href="#">113244426</a> | 2.568761128 | 1.361073 | 0.011983 | 0.03261  |
| B3GALT4      | <a href="#">113243802</a> | 2.568661206 | 1.361017 | 0.008077 | 0.023384 |
| TJP1         | <a href="#">113263619</a> | 2.568406447 | 1.360874 | 0.001427 | 0.005259 |
| LY6G5B       | <a href="#">113243725</a> | 2.567988267 | 1.360639 | 0.001065 | 0.004066 |
| ZNF484       | <a href="#">113270082</a> | 2.566855256 | 1.360002 | 0.008425 | 0.02419  |
| DCAF6        | <a href="#">113262875</a> | 3.634561826 | 1.861781 | 0.000659 | 0.002677 |
| CUNH9orf16   | <a href="#">113266457</a> | 3.63428294  | 1.861671 | 3.14E-05 | 0.000175 |
| ZNF391       | <a href="#">113264258</a> | 3.632274446 | 1.860873 | 2.25E-05 | 0.00013  |
| CCDC136      | <a href="#">113263909</a> | 3.631012608 | 1.860372 | 4.25E-05 | 0.00023  |
| ZYG11B       | <a href="#">113254661</a> | 3.626846199 | 1.858716 | 4E-05    | 0.000218 |
| MRPL21       | <a href="#">113243993</a> | 3.615653444 | 1.854256 | 8.04E-06 | 5.18E-05 |
| RAPGEF1      | <a href="#">113266537</a> | 3.614830168 | 1.853928 | 1.72E-05 | 0.000103 |
| FASTK        | <a href="#">113241480</a> | 3.611712036 | 1.852683 | 7.63E-06 | 4.95E-05 |
| NOX4         | <a href="#">113269421</a> | 3.61000922  | 1.852003 | 0.002226 | 0.007732 |
| LOC113247021 | <a href="#">113247021</a> | 3.606306538 | 1.850522 | 0.001393 | 0.005149 |
| YPEL2        | <a href="#">113268888</a> | 3.605804345 | 1.850321 | 2.2E-05  | 0.000128 |
| AVPI1        | <a href="#">113251796</a> | 3.603725364 | 1.849489 | 0.000616 | 0.002525 |

|              |                           |             |          |          |          |
|--------------|---------------------------|-------------|----------|----------|----------|
| PLEKHH3      | <a href="#">113265409</a> | 3.603014788 | 1.849205 | 3.91E-06 | 2.69E-05 |
| EML1         | <a href="#">113267272</a> | 3.601332967 | 1.848531 | 0.000235 | 0.001077 |
| PIH1D1       | <a href="#">113243302</a> | 3.599848866 | 1.847936 | 2.04E-06 | 1.47E-05 |
| CGNL1        | <a href="#">113269670</a> | 3.59961167  | 1.847841 | 2.86E-05 | 0.000162 |
| ANO5         | <a href="#">113265108</a> | 3.598247884 | 1.847295 | 0.006651 | 0.019871 |
| GMPS         | <a href="#">113254098</a> | 3.593739088 | 1.845486 | 0.000134 | 0.000651 |
| SLC7A6OS     | <a href="#">113252408</a> | 3.592077977 | 1.844819 | 1.13E-05 | 7.03E-05 |
| NEDD4L       | <a href="#">113253456</a> | 3.590042364 | 1.844001 | 4.92E-06 | 3.32E-05 |
| GAL3ST2      | <a href="#">113249264</a> | 3.588002696 | 1.843181 | 0.000785 | 0.003116 |
| F3           | <a href="#">113254382</a> | 3.58712502  | 1.842828 | 0.001606 | 0.005826 |
| TMEM134      | <a href="#">113244024</a> | 3.586823694 | 1.842707 | 2.17E-06 | 1.56E-05 |
| APPL1        | <a href="#">113257000</a> | 3.586415354 | 1.842543 | 3.51E-06 | 2.43E-05 |
| CRYBG3       | <a href="#">113250328</a> | 3.58226459  | 1.840872 | 0.000178 | 0.000843 |
| MEF2A        | <a href="#">113263641</a> | 3.579281776 | 1.83967  | 6.59E-07 | 5.2E-06  |
| ADCY10       | <a href="#">113262877</a> | 3.579032156 | 1.83957  | 0.003191 | 0.010557 |
| PAIP2B       | <a href="#">113244155</a> | 3.576908199 | 1.838713 | 2.02E-05 | 0.000118 |
| ATP5MC3      | <a href="#">113250747</a> | 3.575720243 | 1.838234 | 0.001031 | 0.003954 |
| CEP85L       | <a href="#">113259392</a> | 3.574804437 | 1.837864 | 5.18E-06 | 3.49E-05 |
| TMEM159      | <a href="#">113267545</a> | 3.573363401 | 1.837283 | 1.3E-06  | 9.7E-06  |
| ZNF524       | <a href="#">113247354</a> | 3.56960476  | 1.835764 | 9.97E-06 | 6.3E-05  |
| TUFM         | <a href="#">113267631</a> | 3.569499479 | 1.835722 | 0.000335 | 0.001469 |
| DLD          | <a href="#">113258483</a> | 3.566928697 | 1.834682 | 0.001165 | 0.004399 |
| CRIM1        | <a href="#">113241217</a> | 3.564725219 | 1.833791 | 9.95E-05 | 0.000499 |
| SDHA         | <a href="#">113260769</a> | 3.551950163 | 1.828611 | 0.000354 | 0.001546 |
| CLEC14A      | <a href="#">113266145</a> | 3.551781527 | 1.828543 | 4.67E-06 | 3.17E-05 |
| SDR39U1      | <a href="#">113246062</a> | 3.549307038 | 1.827537 | 9.03E-05 | 0.000457 |
| TMEM30B      | <a href="#">113242411</a> | 3.54742764  | 1.826773 | 0.002505 | 0.008557 |
| LOC113258537 | <a href="#">113258537</a> | 3.546022548 | 1.826202 | 1.72E-05 | 0.000102 |

|              |                           |             |          |          |          |
|--------------|---------------------------|-------------|----------|----------|----------|
| LOC113253205 | <a href="#">113253205</a> | 3.545114425 | 1.825832 | 2.89E-05 | 0.000164 |
| PCBD2        | <a href="#">113261752</a> | 3.544442697 | 1.825559 | 4.42E-06 | 3.01E-05 |
| ADAMTSL3     | <a href="#">113263758</a> | 3.544401778 | 1.825542 | 0.000146 | 0.000702 |
| PLCB4        | <a href="#">113258346</a> | 3.539653277 | 1.823608 | 0.000218 | 0.001005 |
| CATSPER3     | <a href="#">113261753</a> | 3.536271087 | 1.822229 | 0.001098 | 0.004174 |
| ZXDC         | <a href="#">113257283</a> | 3.532674258 | 1.820761 | 2.51E-06 | 1.78E-05 |
| VEGFB        | <a href="#">113244181</a> | 3.528584524 | 1.81909  | 0.001352 | 0.005014 |
| TIGD3        | <a href="#">113243923</a> | 3.526810685 | 1.818364 | 0.001581 | 0.005754 |
| APOPT1       | <a href="#">113267216</a> | 3.524507604 | 1.817422 | 1.52E-05 | 9.17E-05 |
| LOC113265291 | <a href="#">113265291</a> | 3.520374274 | 1.815729 | 8.54E-06 | 5.48E-05 |
| PIK3IP1      | <a href="#">113245057</a> | 3.518942195 | 1.815142 | 0.000187 | 0.000879 |
| PPFIBP1      | <a href="#">113257771</a> | 3.510416902 | 1.811642 | 3.28E-06 | 2.28E-05 |
| PDHX         | <a href="#">113265044</a> | 3.507148103 | 1.810298 | 0.000126 | 0.000617 |
| LOC113248583 | <a href="#">113248583</a> | 3.503187132 | 1.808668 | 0.000305 | 0.001356 |
| RPS29        | <a href="#">113266188</a> | 3.499883319 | 1.807307 | 0.00435  | 0.013767 |
| COQ6         | <a href="#">113270341</a> | 3.49963143  | 1.807203 | 3E-06    | 2.1E-05  |
| YBX2         | <a href="#">113271116</a> | 3.499617162 | 1.807197 | 0.000601 | 0.002467 |
| MAVS         | <a href="#">113258384</a> | 3.4958603   | 1.805648 | 1.64E-06 | 1.2E-05  |
| ACKR3        | <a href="#">113250308</a> | 3.488821828 | 1.80274  | 0.003605 | 0.011736 |
| EIF3G        | <a href="#">113242974</a> | 3.488490533 | 1.802603 | 0.000421 | 0.0018   |
| ENHO         | <a href="#">113260508</a> | 3.488172505 | 1.802471 | 0.000769 | 0.003064 |
| SPINK2       | <a href="#">113262527</a> | 3.483467    | 1.800524 | 0.000823 | 0.003254 |
| MRPS25       | <a href="#">113257208</a> | 3.480569347 | 1.799323 | 4.47E-06 | 3.04E-05 |
| SLC4A4       | <a href="#">113263295</a> | 3.480401025 | 1.799254 | 0.007118 | 0.021017 |
| LOC113247912 | <a href="#">113247912</a> | 3.47871395  | 1.798554 | 0.002339 | 0.008064 |
| ATXN7L2      | <a href="#">113244924</a> | 3.475356065 | 1.797161 | 0.000112 | 0.000557 |
| POU6F1       | <a href="#">113257612</a> | 3.472595388 | 1.796014 | 6.11E-05 | 0.000322 |
| AMOTL1       | <a href="#">113259818</a> | 3.468205742 | 1.794189 | 4.56E-05 | 0.000246 |

|              |                           |             |          |          |          |
|--------------|---------------------------|-------------|----------|----------|----------|
| PRKAR2A      | <a href="#">113256848</a> | 3.467441067 | 1.793871 | 0.000783 | 0.003113 |
| LOC113254662 | <a href="#">113254662</a> | 3.465723371 | 1.793157 | 0.000167 | 0.000793 |
| ZNF594       | <a href="#">113271063</a> | 3.463772534 | 1.792344 | 0.001363 | 0.00505  |
| ID1          | <a href="#">113258459</a> | 3.461662916 | 1.791465 | 1.94E-05 | 0.000114 |
| DIP2C        | <a href="#">113241102</a> | 3.459304406 | 1.790482 | 1.98E-06 | 1.43E-05 |
| CREM         | <a href="#">113244224</a> | 3.458214465 | 1.790027 | 1.19E-05 | 7.41E-05 |
| MAP4         | <a href="#">113256822</a> | 3.457188853 | 1.789599 | 0.002493 | 0.008523 |
| CUNH14orf132 | <a href="#">113267299</a> | 3.455865418 | 1.789047 | 0.012174 | 0.033026 |
| RIC8B        | <a href="#">113256034</a> | 3.454698727 | 1.78856  | 4.38E-06 | 2.99E-05 |
| CDH6         | <a href="#">113260848</a> | 3.452467856 | 1.787628 | 0.000698 | 0.002819 |
| LRRC66       | <a href="#">113262481</a> | 3.449724097 | 1.786481 | 0.000739 | 0.002959 |
| VMA21        | <a href="#">113246824</a> | 3.444533538 | 1.784309 | 2.16E-05 | 0.000126 |
| NDUFC1       | <a href="#">113255686</a> | 3.442579605 | 1.78349  | 1.68E-05 | 0.0001   |
| SGCB         | <a href="#">113262483</a> | 3.442086369 | 1.783283 | 0.000701 | 0.002825 |
| LOC113260556 | <a href="#">113260556</a> | 3.440184957 | 1.782486 | 0.002187 | 0.007616 |
| ACAA2        | <a href="#">113253408</a> | 3.439193221 | 1.78207  | 0.000414 | 0.001775 |
| OLFML2A      | <a href="#">113266401</a> | 3.434517205 | 1.780107 | 0.000115 | 0.000569 |
| HINT3        | <a href="#">113259418</a> | 3.434023859 | 1.7799   | 0.000189 | 0.000886 |
| AMIGO2       | <a href="#">113257695</a> | 3.43372626  | 1.779775 | 0.01055  | 0.029196 |
| PDCD2L       | <a href="#">113244745</a> | 3.432722361 | 1.779353 | 0.000268 | 0.001207 |
| TMEM255A     | <a href="#">113270909</a> | 3.426475939 | 1.776726 | 0.003208 | 0.010606 |
| CPEB3        | <a href="#">113243165</a> | 3.425567628 | 1.776343 | 3.1E-05  | 0.000173 |
| LOC113265073 | <a href="#">113265073</a> | 3.418345673 | 1.773298 | 0.007151 | 0.021095 |
| NDUFB1       | <a href="#">113267167</a> | 3.415993453 | 1.772305 | 5.17E-06 | 3.48E-05 |
| UBE3D        | <a href="#">113261067</a> | 3.415799139 | 1.772223 | 2.93E-05 | 0.000165 |
| NDUFS5       | <a href="#">113268254</a> | 3.411185816 | 1.770273 | 6.72E-05 | 0.00035  |
| LRRC28       | <a href="#">113263643</a> | 3.410676985 | 1.770058 | 9.2E-05  | 0.000464 |
| ASB9         | <a href="#">113240712</a> | 3.409259744 | 1.769459 | 0.00058  | 0.002394 |

|              |                           |             |          |          |          |
|--------------|---------------------------|-------------|----------|----------|----------|
| LAMA3        | <a href="#">113253294</a> | 3.407777798 | 1.768831 | 2.38E-05 | 0.000137 |
| NR3C2        | <a href="#">113255738</a> | 3.406989183 | 1.768497 | 4.56E-05 | 0.000246 |
| RAMP3        | <a href="#">113257714</a> | 3.406345448 | 1.768225 | 0.000741 | 0.002967 |
| LYSMD2       | <a href="#">113269627</a> | 3.404966137 | 1.76764  | 9.9E-05  | 0.000497 |
| RAB9B        | <a href="#">113248103</a> | 3.395980463 | 1.763828 | 0.002074 | 0.007258 |
| MICU3        | <a href="#">113262162</a> | 3.391900113 | 1.762094 | 7.07E-05 | 0.000367 |
| IGFBP3       | <a href="#">113257692</a> | 3.391405912 | 1.761883 | 0.000638 | 0.002602 |
| PAQR6        | <a href="#">113245241</a> | 3.388994821 | 1.760857 | 0.001753 | 0.006275 |
| HOXD8        | <a href="#">113250741</a> | 3.38647232  | 1.759783 | 0.000437 | 0.00186  |
| ATP5F1E      | <a href="#">113258773</a> | 3.383238802 | 1.758405 | 0.001436 | 0.005284 |
| PPT2         | <a href="#">113243752</a> | 3.382448144 | 1.758068 | 3.13E-05 | 0.000175 |
| CRYGN        | <a href="#">113241492</a> | 3.381813683 | 1.757797 | 0.002068 | 0.00724  |
| LOC113249678 | <a href="#">113249678</a> | 3.381784643 | 1.757785 | 0.00072  | 0.002894 |
| GKAP1        | <a href="#">113269812</a> | 3.381160965 | 1.757519 | 2.87E-05 | 0.000163 |
| F8           | <a href="#">113248344</a> | 3.378847678 | 1.756531 | 8.01E-06 | 5.17E-05 |
| AKTIP        | <a href="#">113252238</a> | 3.3778185   | 1.756092 | 5.18E-06 | 3.48E-05 |
| RPL36        | <a href="#">113242860</a> | 3.377394781 | 1.755911 | 0.001506 | 0.005519 |
| PPIF         | <a href="#">113259219</a> | 3.377145178 | 1.755804 | 5.11E-05 | 0.000274 |
| PAX1         | <a href="#">113246770</a> | 3.375600611 | 1.755144 | 0.000765 | 0.003053 |
| NICN1        | <a href="#">113256875</a> | 3.374928071 | 1.754857 | 5.15E-05 | 0.000276 |
| DOCK9        | <a href="#">113251489</a> | 3.372852403 | 1.753969 | 0.000307 | 0.001367 |
| KLHL3        | <a href="#">113261768</a> | 3.372512597 | 1.753824 | 0.000216 | 0.001    |
| EIF1         | <a href="#">113265448</a> | 3.369293016 | 1.752446 | 0.002273 | 0.00787  |
| ETFA         | <a href="#">113248087</a> | 3.366827865 | 1.75139  | 0.0006   | 0.002463 |
| PPP1R2       | <a href="#">113253297</a> | 3.365070153 | 1.750637 | 9.29E-05 | 0.000469 |
| MYLK3        | <a href="#">113252202</a> | 3.364743685 | 1.750497 | 0.000791 | 0.003136 |
| CA8          | <a href="#">113268071</a> | 3.362669725 | 1.749607 | 0.005569 | 0.017079 |
| TIMM10       | <a href="#">113246386</a> | 3.360979145 | 1.748882 | 1.46E-05 | 8.86E-05 |

|              |                           |             |          |          |          |
|--------------|---------------------------|-------------|----------|----------|----------|
| DNAJB4       | <a href="#">113254500</a> | 3.360159745 | 1.74853  | 3.75E-05 | 0.000206 |
| HSF2BP       | <a href="#">113253534</a> | 3.359879498 | 1.748409 | 0.003219 | 0.010634 |
| KANK3        | <a href="#">113242903</a> | 3.35878905  | 1.747941 | 1.97E-05 | 0.000115 |
| EGFL7        | <a href="#">113248635</a> | 3.358451504 | 1.747796 | 0.000227 | 0.001044 |
| LOC113249852 | <a href="#">113249852</a> | 3.345980624 | 1.742429 | 0.004494 | 0.014173 |
| LOC113251944 | <a href="#">113251944</a> | 3.344200335 | 1.741661 | 2.83E-05 | 0.000161 |
| RPS11        | <a href="#">113243297</a> | 3.342725509 | 1.741025 | 0.015891 | 0.041499 |
| NFU1         | <a href="#">113244593</a> | 3.342541885 | 1.740946 | 0.000218 | 0.001006 |
| MTHFD2L      | <a href="#">113263273</a> | 3.342135295 | 1.74077  | 0.001544 | 0.005636 |
| PLCH2        | <a href="#">113270598</a> | 3.340930487 | 1.74025  | 0.004913 | 0.015351 |
| LOC113266881 | <a href="#">113266881</a> | 3.340637861 | 1.740124 | 0.003867 | 0.012438 |
| DLL4         | <a href="#">113242017</a> | 3.337376829 | 1.738715 | 9.73E-05 | 0.000489 |
| IL20RB       | <a href="#">113253976</a> | 3.33627415  | 1.738238 | 0.001155 | 0.00437  |
| SEZ6L2       | <a href="#">113267659</a> | 3.333547304 | 1.737058 | 0.00139  | 0.00514  |
| SLC35E4      | <a href="#">113245043</a> | 3.333370453 | 1.736982 | 0.001078 | 0.004107 |
| STAC2        | <a href="#">113265524</a> | 3.331141012 | 1.736016 | 0.003093 | 0.010266 |
| KIF5A        | <a href="#">113256376</a> | 3.330410028 | 1.7357   | 0.002441 | 0.008371 |
| KLC2         | <a href="#">113244076</a> | 3.329548735 | 1.735327 | 2.99E-05 | 0.000168 |
| GPR176       | <a href="#">113242047</a> | 3.329280627 | 1.73521  | 0.003092 | 0.010262 |
| EEPD1        | <a href="#">113262749</a> | 3.3271882   | 1.734303 | 1.7E-05  | 0.000101 |
| FAN1         | <a href="#">113263610</a> | 3.326754004 | 1.734115 | 3.25E-06 | 2.26E-05 |
| METTL25      | <a href="#">113256211</a> | 3.324669791 | 1.733211 | 1.31E-05 | 8.04E-05 |
| HOXA4        | <a href="#">113261989</a> | 3.321005488 | 1.73162  | 0.002582 | 0.008785 |
| TRNP1        | <a href="#">113268445</a> | 3.319231645 | 1.730849 | 0.00246  | 0.008424 |
| KIRREL2      | <a href="#">113244768</a> | 3.317684807 | 1.730177 | 0.004848 | 0.015177 |
| OTUD6B       | <a href="#">113252945</a> | 3.314109655 | 1.728621 | 7E-06    | 4.58E-05 |
| LOC113245484 | <a href="#">113245484</a> | 3.313583272 | 1.728392 | 0.002849 | 0.009569 |
| HSD11B1      | <a href="#">113262645</a> | 3.312689487 | 1.728003 | 0.004546 | 0.014315 |

|              |                           |             |          |          |          |
|--------------|---------------------------|-------------|----------|----------|----------|
| AIMP2        | <a href="#">113267935</a> | 3.31022476  | 1.726929 | 5.39E-06 | 3.61E-05 |
| ZSCAN23      | <a href="#">113248160</a> | 3.309281715 | 1.726518 | 0.000293 | 0.001312 |
| CBX7         | <a href="#">113241765</a> | 3.308187355 | 1.726041 | 0.000142 | 0.000685 |
| SORBS3       | <a href="#">113270000</a> | 3.304664506 | 1.724504 | 1.94E-05 | 0.000114 |
| NDUFA2       | <a href="#">113261833</a> | 3.304150656 | 1.724279 | 4.75E-05 | 0.000255 |
| PPIP5K1      | <a href="#">113241961</a> | 3.303392757 | 1.723949 | 7.88E-06 | 5.1E-05  |
| LOC113251647 | <a href="#">113251647</a> | 3.300370629 | 1.722628 | 6.58E-05 | 0.000343 |
| LOC113249996 | <a href="#">113249996</a> | 3.299999582 | 1.722466 | 0.000824 | 0.003256 |
| ZNF768       | <a href="#">113267684</a> | 3.296789498 | 1.721062 | 2.54E-05 | 0.000145 |
| LRRFIP2      | <a href="#">113253771</a> | 3.291459626 | 1.718728 | 8.89E-06 | 5.68E-05 |
| SMC1B        | <a href="#">113241654</a> | 3.289621151 | 1.717921 | 0.003595 | 0.011709 |
| CD101        | <a href="#">113244376</a> | 3.288270827 | 1.717329 | 0.008184 | 0.023616 |
| CNTNAP2      | <a href="#">113241449</a> | 3.287882427 | 1.717159 | 0.007861 | 0.022875 |
| DOCK6        | <a href="#">113243014</a> | 3.287431334 | 1.716961 | 1.3E-05  | 7.99E-05 |
| STAU2        | <a href="#">113253047</a> | 3.287052728 | 1.716795 | 8.96E-06 | 5.72E-05 |
| NCBP2-AS2    | <a href="#">113253142</a> | 3.285664605 | 1.716185 | 3.53E-05 | 0.000195 |
| FEZ1         | <a href="#">113259906</a> | 3.28492096  | 1.715859 | 0.00271  | 0.009173 |
| RTKN         | <a href="#">113243549</a> | 3.282075499 | 1.714608 | 2.72E-05 | 0.000155 |
| HSPB1        | <a href="#">113267813</a> | 3.278535964 | 1.713052 | 0.000425 | 0.001817 |
| IL33         | <a href="#">113260625</a> | 3.276372815 | 1.7121   | 0.002602 | 0.008838 |
| TMEM150A     | <a href="#">113243094</a> | 3.27145468  | 1.709932 | 2.66E-05 | 0.000152 |
| LOC113247253 | <a href="#">113247253</a> | 3.271232642 | 1.709834 | 1.3E-05  | 7.98E-05 |
| PERP         | <a href="#">113259487</a> | 3.270614368 | 1.709562 | 0.002334 | 0.008052 |
| TMEM63C      | <a href="#">113270297</a> | 3.266683308 | 1.707827 | 0.004453 | 0.014053 |
| ANHXL        | <a href="#">113266821</a> | 3.264827791 | 1.707007 | 0.004274 | 0.013565 |
| ARHGEF10L    | <a href="#">113270439</a> | 3.264590935 | 1.706902 | 7.82E-06 | 5.07E-05 |
| BNIP3        | <a href="#">113252072</a> | 3.264225442 | 1.706741 | 0.002829 | 0.009515 |
| LOC113241880 | <a href="#">113241880</a> | 3.262983836 | 1.706192 | 0.008391 | 0.024114 |

|              |                           |             |          |          |          |
|--------------|---------------------------|-------------|----------|----------|----------|
| TFB2M        | <a href="#">113262945</a> | 3.261730541 | 1.705638 | 6.36E-05 | 0.000334 |
| ECSIT        | <a href="#">113243030</a> | 3.261076682 | 1.705348 | 1.06E-05 | 6.69E-05 |
| CTF1         | <a href="#">113267705</a> | 3.260390783 | 1.705045 | 0.003193 | 0.01056  |
| CPN1         | <a href="#">113251825</a> | 3.259239549 | 1.704535 | 0.001032 | 0.003957 |
| TBX3         | <a href="#">113267002</a> | 3.258324578 | 1.70413  | 0.00092  | 0.003577 |
| TOMM40L      | <a href="#">113246746</a> | 3.257914495 | 1.703949 | 5.92E-05 | 0.000312 |
| ALKBH5       | <a href="#">113271291</a> | 3.255584654 | 1.702917 | 6.56E-05 | 0.000343 |
| BHLHB9       | <a href="#">113244314</a> | 3.255550596 | 1.702902 | 2.94E-05 | 0.000166 |
| LOC113242947 | <a href="#">113242947</a> | 3.254080071 | 1.70225  | 0.000158 | 0.000755 |
| LOC113247867 | <a href="#">113247867</a> | 3.252606655 | 1.701596 | 0.000699 | 0.002822 |
| CUNH6orf203  | <a href="#">113264776</a> | 3.252515718 | 1.701556 | 3.9E-05  | 0.000213 |
| CACNG7       | <a href="#">113247410</a> | 3.25223201  | 1.70143  | 0.006226 | 0.018821 |
| B3GALNT2     | <a href="#">113259001</a> | 3.250909546 | 1.700843 | 7.3E-05  | 0.000378 |
| HIGD2A       | <a href="#">113264125</a> | 3.247908071 | 1.699511 | 6.3E-05  | 0.000331 |
| MRPL24       | <a href="#">113245221</a> | 3.247124686 | 1.699163 | 2.84E-05 | 0.000161 |
| MAP3K10      | <a href="#">113243573</a> | 3.247044922 | 1.699127 | 0.00012  | 0.000589 |
| GRTP1        | <a href="#">113247574</a> | 3.244403028 | 1.697953 | 0.005745 | 0.017561 |
| GBX1         | <a href="#">113241483</a> | 3.244314094 | 1.697913 | 0.003987 | 0.012774 |
| FBXL8        | <a href="#">113252354</a> | 3.243087029 | 1.697368 | 0.002653 | 0.008994 |
| WSCD1        | <a href="#">113271054</a> | 3.241164239 | 1.696512 | 1.95E-05 | 0.000114 |
| TMEM51       | <a href="#">113270481</a> | 3.240518983 | 1.696225 | 0.00107  | 0.004082 |
| MYO18A       | <a href="#">113269060</a> | 3.238414511 | 1.695288 | 0.000779 | 0.003097 |
| PADI2        | <a href="#">113270446</a> | 3.236029531 | 1.694225 | 0.009881 | 0.02763  |
| GPR75        | <a href="#">113245790</a> | 3.235099395 | 1.69381  | 0.003227 | 0.010653 |
| CCDC85A      | <a href="#">113245393</a> | 3.232152111 | 1.692495 | 0.003833 | 0.01236  |
| ZBTB47       | <a href="#">113253822</a> | 3.2260961   | 1.689789 | 0.000535 | 0.002222 |
| MMP24        | <a href="#">113258534</a> | 3.225922897 | 1.689712 | 0.001628 | 0.005891 |
| TRHDE        | <a href="#">113256259</a> | 3.225791202 | 1.689653 | 0.005813 | 0.017745 |

|              |                           |             |          |          |          |
|--------------|---------------------------|-------------|----------|----------|----------|
| KCNQ5        | <a href="#">113261119</a> | 3.22546534  | 1.689507 | 0.008045 | 0.023317 |
| RPL35A       | <a href="#">113252711</a> | 3.223755385 | 1.688742 | 0.012074 | 0.032784 |
| NRN1         | <a href="#">113264419</a> | 3.222334922 | 1.688106 | 0.005384 | 0.016621 |
| NDUFB3       | <a href="#">113250598</a> | 3.21772801  | 1.686042 | 6.63E-05 | 0.000346 |
| MYORG        | <a href="#">113260509</a> | 3.215011339 | 1.684824 | 0.008114 | 0.023467 |
| PSTPIP2      | <a href="#">113253373</a> | 3.212991557 | 1.683917 | 0.000226 | 0.001039 |
| LOC113254434 | <a href="#">113254434</a> | 3.209359011 | 1.682285 | 9.07E-05 | 0.000459 |
| CIART        | <a href="#">113246110</a> | 3.208303655 | 1.681811 | 0.006768 | 0.020136 |
| MRPS2        | <a href="#">113266589</a> | 3.20653382  | 1.681015 | 0.000104 | 0.00052  |
| THSD1        | <a href="#">113251287</a> | 3.205870368 | 1.680716 | 0.003461 | 0.011332 |
| STAC         | <a href="#">113253765</a> | 3.205029479 | 1.680338 | 0.013498 | 0.036046 |
| SLC25A42     | <a href="#">113256741</a> | 3.203746704 | 1.67976  | 0.002398 | 0.008235 |
| SQSTM1       | <a href="#">113261555</a> | 3.20347816  | 1.679639 | 0.002571 | 0.008752 |
| TCTA         | <a href="#">113256877</a> | 3.203353044 | 1.679583 | 1.4E-05  | 8.55E-05 |
| RITA1        | <a href="#">113266990</a> | 3.202574242 | 1.679232 | 1.28E-05 | 7.86E-05 |
| CDC37L1      | <a href="#">113270165</a> | 3.198859087 | 1.677557 | 2.56E-06 | 1.82E-05 |
| ISLR         | <a href="#">113240961</a> | 3.197064578 | 1.676748 | 0.000753 | 0.00301  |
| TSPAN3       | <a href="#">113241005</a> | 3.193557791 | 1.675165 | 0.000507 | 0.002125 |
| HES4         | <a href="#">113270655</a> | 3.192903465 | 1.674869 | 4.17E-05 | 0.000226 |
| L2HGDH       | <a href="#">113266207</a> | 3.192701414 | 1.674778 | 4.56E-05 | 0.000246 |
| SH3GL3       | <a href="#">113263757</a> | 3.191801043 | 1.674371 | 0.001704 | 0.006125 |
| CUNH16orf95  | <a href="#">113252171</a> | 3.187520806 | 1.672435 | 0.010321 | 0.028684 |
| NOV          | <a href="#">113252778</a> | 3.18730676  | 1.672338 | 0.005888 | 0.017944 |
| LOC113271076 | <a href="#">113271076</a> | 3.183638048 | 1.670676 | 0.006671 | 0.019916 |
| RTN4         | <a href="#">113245629</a> | 3.183131295 | 1.670447 | 0.01305  | 0.035064 |
| GPIHBP1      | <a href="#">113247595</a> | 3.18062491  | 1.66931  | 0.0023   | 0.007948 |
| ITGA3        | <a href="#">113265609</a> | 3.18030223  | 1.669164 | 0.000486 | 0.002047 |
| LOC113270384 | <a href="#">113270384</a> | 3.180292033 | 1.669159 | 0.000119 | 0.000587 |

|              |                           |             |          |          |          |
|--------------|---------------------------|-------------|----------|----------|----------|
| WSB2         | <a href="#">113267016</a> | 3.180198765 | 1.669117 | 8.34E-05 | 0.000426 |
| RUNDC3B      | <a href="#">113259507</a> | 3.179494246 | 1.668797 | 4.68E-05 | 0.000252 |
| DLGAP1       | <a href="#">113253243</a> | 3.179394387 | 1.668752 | 0.002276 | 0.007879 |
| LOC113247252 | <a href="#">113247252</a> | 3.175718691 | 1.667083 | 0.003653 | 0.011857 |
| AGMO         | <a href="#">113260890</a> | 3.174381325 | 1.666475 | 0.006392 | 0.019223 |
| TCEAL1       | <a href="#">113249836</a> | 3.173393193 | 1.666026 | 4.06E-05 | 0.000221 |
| LOC113246566 | <a href="#">113246566</a> | 3.17200725  | 1.665396 | 5.81E-05 | 0.000307 |
| LOC113249742 | <a href="#">113249742</a> | 3.170074408 | 1.664517 | 3.01E-05 | 0.000169 |
| CMC4         | <a href="#">113248350</a> | 3.169996927 | 1.664481 | 0.000369 | 0.001602 |
| SPARCL1      | <a href="#">113263168</a> | 3.168479972 | 1.663791 | 0.00688  | 0.020393 |
| CUNH8orf59   | <a href="#">113252990</a> | 3.167856619 | 1.663507 | 2.91E-05 | 0.000164 |
| HOXB8        | <a href="#">113265579</a> | 3.166925327 | 1.663083 | 0.013044 | 0.035057 |
| NRIP2        | <a href="#">113258024</a> | 3.166214322 | 1.662759 | 0.004041 | 0.012929 |
| RSL24D1      | <a href="#">113269645</a> | 3.16592679  | 1.662628 | 7.27E-06 | 4.74E-05 |
| N4BP2L2      | <a href="#">113251246</a> | 3.165777312 | 1.66256  | 1.9E-05  | 0.000112 |
| EPB41L4A     | <a href="#">113254993</a> | 3.165122854 | 1.662261 | 2.78E-05 | 0.000158 |
| PARP6        | <a href="#">113240936</a> | 3.165115072 | 1.662258 | 7.75E-06 | 5.02E-05 |
| CCDC127      | <a href="#">113260770</a> | 3.164643826 | 1.662043 | 2.45E-05 | 0.00014  |
| LOC113249961 | <a href="#">113249961</a> | 3.16102192  | 1.660391 | 0.001924 | 0.006793 |
| CRADD        | <a href="#">113256160</a> | 3.15696846  | 1.65854  | 0.000787 | 0.003125 |
| PPP1R3B      | <a href="#">113262116</a> | 3.155693908 | 1.657957 | 0.001434 | 0.005279 |
| SNX21        | <a href="#">113258661</a> | 3.152923641 | 1.65669  | 0.000715 | 0.002875 |
| CXXC5        | <a href="#">113261811</a> | 3.149974377 | 1.65534  | 4.74E-06 | 3.21E-05 |
| UBAP1L       | <a href="#">113240866</a> | 3.148494603 | 1.654662 | 0.003127 | 0.010372 |
| RTN4RL1      | <a href="#">113268835</a> | 3.148352228 | 1.654597 | 0.006576 | 0.019686 |
| PTPRM        | <a href="#">113253224</a> | 3.147507696 | 1.65421  | 0.000406 | 0.001747 |
| LOC113268544 | <a href="#">113268544</a> | 3.145088594 | 1.653101 | 3.82E-05 | 0.00021  |
| CCL21        | <a href="#">113260498</a> | 3.143514349 | 1.652378 | 0.007823 | 0.022777 |

|              |                           |             |          |          |          |
|--------------|---------------------------|-------------|----------|----------|----------|
| ZHX2         | <a href="#">113252762</a> | 3.138849228 | 1.650236 | 0.000123 | 0.000601 |
| FOXN3        | <a href="#">113267374</a> | 3.136606716 | 1.649205 | 1.47E-05 | 8.91E-05 |
| NUDT13       | <a href="#">113259171</a> | 3.128458385 | 1.645452 | 0.000299 | 0.001334 |
| LARGE1       | <a href="#">113256015</a> | 3.127513933 | 1.645016 | 0.008572 | 0.024544 |
| EMCN         | <a href="#">113263107</a> | 3.124377145 | 1.643569 | 2.59E-05 | 0.000148 |
| LOC113253436 | <a href="#">113253436</a> | 3.123275119 | 1.64306  | 0.008909 | 0.025359 |
| TMEM236      | <a href="#">113241363</a> | 3.123263769 | 1.643054 | 0.001395 | 0.005153 |
| SLC45A3      | <a href="#">113242479</a> | 3.123023743 | 1.642944 | 0.001883 | 0.006671 |
| ZNF385C      | <a href="#">113265680</a> | 3.122282027 | 1.642601 | 0.005295 | 0.01637  |
| ALKBH8       | <a href="#">113260110</a> | 3.121870715 | 1.642411 | 0.001384 | 0.005121 |
| PCDH19       | <a href="#">113244289</a> | 3.115815013 | 1.63961  | 0.00244  | 0.008369 |
| SLC18B1      | <a href="#">113259462</a> | 3.114702259 | 1.639094 | 0.000133 | 0.000644 |
| BOD1         | <a href="#">113264110</a> | 3.113880542 | 1.638714 | 0.000369 | 0.001602 |
| SBSPON       | <a href="#">113253052</a> | 3.113493738 | 1.638534 | 0.004117 | 0.013133 |
| NDUFA13      | <a href="#">113256757</a> | 3.111234702 | 1.637487 | 0.000117 | 0.000578 |
| NRBF2        | <a href="#">113259094</a> | 3.10769837  | 1.635846 | 9.48E-05 | 0.000478 |
| PRXL2B       | <a href="#">113270607</a> | 3.105641184 | 1.634891 | 0.000725 | 0.002911 |
| RNF7         | <a href="#">113254010</a> | 3.104978476 | 1.634583 | 5.11E-05 | 0.000274 |
| DNAJC28      | <a href="#">113264408</a> | 3.10462868  | 1.634421 | 0.000128 | 0.000625 |
| CAPN12       | <a href="#">113243610</a> | 3.100449573 | 1.632477 | 0.004223 | 0.013424 |
| CARD10       | <a href="#">113241807</a> | 3.099355978 | 1.631968 | 0.000917 | 0.003567 |
| LOC113249681 | <a href="#">113249681</a> | 3.098280033 | 1.631468 | 0.001884 | 0.006674 |
| VOPP1        | <a href="#">113257409</a> | 3.097741038 | 1.631217 | 0.004617 | 0.014528 |
| LIMD1        | <a href="#">113256777</a> | 3.097736055 | 1.631214 | 3.14E-05 | 0.000175 |
| RPL38        | <a href="#">113265208</a> | 3.096636073 | 1.630702 | 0.001757 | 0.006281 |
| YPEL1        | <a href="#">113247045</a> | 3.093371988 | 1.62918  | 8.11E-05 | 0.000416 |
| AR           | <a href="#">113245650</a> | 3.092719756 | 1.628876 | 3.91E-05 | 0.000214 |
| LOC113248605 | <a href="#">113248605</a> | 3.090354863 | 1.627773 | 0.001261 | 0.004721 |

|              |                           |             |          |          |          |
|--------------|---------------------------|-------------|----------|----------|----------|
| MAN2A2       | <a href="#">113263716</a> | 3.089952192 | 1.627585 | 8.81E-05 | 0.000448 |
| NCALD        | <a href="#">113252864</a> | 3.089374358 | 1.627315 | 0.00385  | 0.012393 |
| ZNF76        | <a href="#">113243840</a> | 3.089250653 | 1.627257 | 2.22E-05 | 0.000129 |
| COPS3        | <a href="#">113271306</a> | 3.088961464 | 1.627122 | 2.2E-05  | 0.000128 |
| VEGFA        | <a href="#">113261040</a> | 3.088011465 | 1.626678 | 0.0001   | 0.000503 |
| PDE7B        | <a href="#">113259477</a> | 3.087595446 | 1.626484 | 1.6E-05  | 9.6E-05  |
| TM4SF1       | <a href="#">113254048</a> | 3.084033852 | 1.624819 | 0.000682 | 0.002763 |
| TOMM7        | <a href="#">113261301</a> | 3.08198868  | 1.623862 | 7.41E-05 | 0.000383 |
| VEZT         | <a href="#">113256140</a> | 3.081964155 | 1.62385  | 3.8E-05  | 0.000209 |
| PBX1         | <a href="#">113268685</a> | 3.08132823  | 1.623552 | 1.42E-05 | 8.63E-05 |
| RHOBTB2      | <a href="#">113269988</a> | 3.078871668 | 1.622402 | 6.48E-05 | 0.000339 |
| ARHGAP29     | <a href="#">113254388</a> | 3.076986041 | 1.621518 | 0.000246 | 0.00112  |
| DMWD         | <a href="#">113243413</a> | 3.075466176 | 1.620805 | 0.000118 | 0.00058  |
| LOC113261640 | <a href="#">113261640</a> | 3.074625005 | 1.62041  | 0.003889 | 0.012499 |
| AMT          | <a href="#">113256872</a> | 3.07061378  | 1.618527 | 0.000723 | 0.002904 |
| LOC113257493 | <a href="#">113257493</a> | 3.070480985 | 1.618465 | 0.005897 | 0.017965 |
| SLIRP        | <a href="#">113270282</a> | 3.070346893 | 1.618402 | 8.82E-05 | 0.000448 |
| TMLHE        | <a href="#">113248335</a> | 3.066465787 | 1.616577 | 0.000237 | 0.001082 |
| GUCY1A2      | <a href="#">113260215</a> | 3.064568545 | 1.615684 | 0.004317 | 0.013677 |
| PLB1         | <a href="#">113267984</a> | 3.061448905 | 1.614215 | 0.011304 | 0.030966 |
| LOC113243636 | <a href="#">113243636</a> | 3.059412963 | 1.613255 | 5.29E-05 | 0.000282 |
| NDUFA7       | <a href="#">113242904</a> | 3.058628647 | 1.612885 | 3.51E-05 | 0.000194 |
| TMED1        | <a href="#">113243002</a> | 3.057609485 | 1.612404 | 7.91E-05 | 0.000406 |
| LYRM1        | <a href="#">113267537</a> | 3.056264922 | 1.61177  | 0.003377 | 0.011077 |
| ST3GAL3      | <a href="#">113254779</a> | 3.055638811 | 1.611474 | 1.61E-05 | 9.67E-05 |
| SCMH1        | <a href="#">113254820</a> | 3.053364966 | 1.6104   | 0.000228 | 0.001045 |
| USP25        | <a href="#">113244784</a> | 3.051220059 | 1.609386 | 2E-05    | 0.000117 |
| SORCS2       | <a href="#">113245719</a> | 3.049896892 | 1.60876  | 0.001735 | 0.006222 |

|              |                           |             |          |          |          |
|--------------|---------------------------|-------------|----------|----------|----------|
| GNG7         | <a href="#">113242789</a> | 3.049512409 | 1.608579 | 0.00028  | 0.001257 |
| MAP4K3       | <a href="#">113241667</a> | 3.04813507  | 1.607927 | 7.15E-06 | 4.67E-05 |
| PDGFB        | <a href="#">113241764</a> | 3.047850226 | 1.607792 | 0.001582 | 0.005755 |
| TRIAP1       | <a href="#">113267045</a> | 3.047335792 | 1.607548 | 2.77E-05 | 0.000157 |
| MTFR1L       | <a href="#">113268482</a> | 3.047187335 | 1.607478 | 5.44E-05 | 0.000289 |
| FSCN2        | <a href="#">113244518</a> | 3.046949897 | 1.607366 | 0.004356 | 0.013784 |
| CLDN5        | <a href="#">113245974</a> | 3.042604861 | 1.605307 | 0.001608 | 0.005828 |
| PSMG3        | <a href="#">113247741</a> | 3.040650957 | 1.60438  | 5.3E-05  | 0.000282 |
| OTUD4        | <a href="#">113255723</a> | 3.04010752  | 1.604122 | 5.45E-05 | 0.000289 |
| HADHA        | <a href="#">113270772</a> | 3.037818145 | 1.603036 | 0.005896 | 0.017965 |
| ARHGAP20     | <a href="#">113260078</a> | 3.036761746 | 1.602534 | 0.00105  | 0.004018 |
| CMC1         | <a href="#">113253855</a> | 3.03418237  | 1.601308 | 0.000117 | 0.000579 |
| FOXP3        | <a href="#">113265955</a> | 3.034167155 | 1.601301 | 0.002717 | 0.009185 |
| GABBR2       | <a href="#">113260410</a> | 3.033035157 | 1.600762 | 0.004718 | 0.014813 |
| SPATA25      | <a href="#">113258663</a> | 3.031651749 | 1.600104 | 0.004054 | 0.012959 |
| ISCU         | <a href="#">113267071</a> | 3.031013367 | 1.5998   | 0.001177 | 0.004438 |
| PARP3        | <a href="#">113256932</a> | 3.026914092 | 1.597848 | 0.01965  | 0.049571 |
| IL17RD       | <a href="#">113256999</a> | 3.026326726 | 1.597568 | 0.005218 | 0.016178 |
| KCNJ8        | <a href="#">113257805</a> | 3.026287878 | 1.597549 | 0.003619 | 0.011776 |
| EFCAB2       | <a href="#">113262948</a> | 3.021602339 | 1.595314 | 7.31E-05 | 0.000379 |
| MEOX2        | <a href="#">113260901</a> | 3.02123643  | 1.595139 | 0.002503 | 0.008555 |
| HS3ST2       | <a href="#">113267566</a> | 3.021017279 | 1.595034 | 0.001918 | 0.006776 |
| LOC113247899 | <a href="#">113247899</a> | 3.01898878  | 1.594065 | 0.000404 | 0.001738 |
| MVB12B       | <a href="#">113266416</a> | 3.017825097 | 1.593509 | 3.04E-05 | 0.00017  |
| CPT2         | <a href="#">113254653</a> | 3.010955135 | 1.590221 | 0.000871 | 0.003415 |
| TNFRSF9      | <a href="#">113270556</a> | 3.0090342   | 1.589301 | 0.000596 | 0.002449 |
| PATL1        | <a href="#">113248883</a> | 3.007148392 | 1.588396 | 3.04E-05 | 0.00017  |
| TMEM8B       | <a href="#">113260461</a> | 3.007100132 | 1.588373 | 0.000592 | 0.002438 |

|              |                           |             |          |          |          |
|--------------|---------------------------|-------------|----------|----------|----------|
| SGCG         | <a href="#">113251183</a> | 3.007094587 | 1.58837  | 0.015773 | 0.041262 |
| SLC7A6       | <a href="#">113252404</a> | 3.007052225 | 1.58835  | 7.14E-05 | 0.00037  |
| SHISA8       | <a href="#">113241716</a> | 3.006590546 | 1.588128 | 0.011706 | 0.031939 |
| N6AMT1       | <a href="#">113268381</a> | 3.004651186 | 1.587198 | 0.000104 | 0.000518 |
| TMEM147      | <a href="#">113244830</a> | 3.003625296 | 1.586705 | 0.00049  | 0.002062 |
| KCNJ16       | <a href="#">113265225</a> | 3.002202817 | 1.586021 | 0.005876 | 0.01792  |
| PEX5         | <a href="#">113257939</a> | 3.001294996 | 1.585585 | 7.73E-05 | 0.000397 |
| SDHAF3       | <a href="#">113260440</a> | 3.000598165 | 1.58525  | 0.000521 | 0.002176 |
| MRPL19       | <a href="#">113243374</a> | 2.997723905 | 1.583868 | 0.000378 | 0.001639 |
| IMPA2        | <a href="#">113245922</a> | 2.997096942 | 1.583566 | 3.14E-05 | 0.000175 |
| ANGPT4       | <a href="#">113258433</a> | 2.996431864 | 1.583246 | 0.000148 | 0.000711 |
| RGS11        | <a href="#">113245366</a> | 2.993369447 | 1.58177  | 0.003204 | 0.010593 |
| RPL30        | <a href="#">113252895</a> | 2.99263702  | 1.581417 | 0.019658 | 0.049573 |
| YAP1         | <a href="#">113259721</a> | 2.992505241 | 1.581354 | 0.000161 | 0.000769 |
| SELENOW      | <a href="#">113243361</a> | 2.990183274 | 1.580234 | 5.33E-05 | 0.000284 |
| PTOV1        | <a href="#">113243281</a> | 2.989402743 | 1.579857 | 0.000122 | 0.000599 |
| MNAT1        | <a href="#">113242407</a> | 2.98846362  | 1.579404 | 4.73E-05 | 0.000255 |
| DMAC2        | <a href="#">113243534</a> | 2.985978266 | 1.578204 | 4.45E-05 | 0.000241 |
| SNTA1        | <a href="#">113258493</a> | 2.978898336 | 1.574779 | 0.007595 | 0.02222  |
| LHFPL1       | <a href="#">113241246</a> | 2.977397011 | 1.574052 | 0.004399 | 0.013897 |
| ESAM         | <a href="#">113259915</a> | 2.973636336 | 1.572228 | 0.000103 | 0.000513 |
| CREB5        | <a href="#">113262153</a> | 2.971958151 | 1.571414 | 0.002347 | 0.008081 |
| NDUFV3       | <a href="#">113254594</a> | 2.97096868  | 1.570933 | 6.08E-05 | 0.00032  |
| ZNF532       | <a href="#">113253462</a> | 2.965553097 | 1.568301 | 2E-05    | 0.000117 |
| NDST1        | <a href="#">113263951</a> | 2.965256413 | 1.568157 | 3.91E-05 | 0.000214 |
| LOC113248316 | <a href="#">113248316</a> | 2.960585158 | 1.565882 | 0.000394 | 0.001698 |
| TRMT10C      | <a href="#">113250698</a> | 2.959536003 | 1.565371 | 0.000251 | 0.001138 |
| DNAJC21      | <a href="#">113260878</a> | 2.958566218 | 1.564898 | 2.44E-05 | 0.00014  |

|              |                           |             |          |          |          |
|--------------|---------------------------|-------------|----------|----------|----------|
| MRS2         | <a href="#">113264337</a> | 2.958544357 | 1.564888 | 0.001212 | 0.004558 |
| LOC113242682 | <a href="#">113242682</a> | 2.957615628 | 1.564435 | 0.004298 | 0.013627 |
| SMIM11A      | <a href="#">113262792</a> | 2.956998962 | 1.564134 | 8.48E-05 | 0.000432 |
| HEY1         | <a href="#">113253020</a> | 2.954742827 | 1.563033 | 0.000919 | 0.003576 |
| USP24        | <a href="#">113254622</a> | 2.954093942 | 1.562716 | 0.000761 | 0.003036 |
| SESN1        | <a href="#">113264757</a> | 2.950433559 | 1.560927 | 0.000187 | 0.000879 |
| MBNL2        | <a href="#">113251479</a> | 2.950423602 | 1.560922 | 0.004415 | 0.013945 |
| AFDN         | <a href="#">113247099</a> | 2.94858014  | 1.56002  | 0.000191 | 0.000892 |
| NOSTRIN      | <a href="#">113250810</a> | 2.947519223 | 1.559501 | 0.009267 | 0.026214 |
| KEAP1        | <a href="#">113242989</a> | 2.947263427 | 1.559376 | 0.000882 | 0.003448 |
| HYKK         | <a href="#">113263805</a> | 2.945437606 | 1.558482 | 0.003228 | 0.010653 |
| SLC3A1       | <a href="#">113246247</a> | 2.944148651 | 1.557851 | 0.000513 | 0.002148 |
| FTO          | <a href="#">113252242</a> | 2.9435233   | 1.557544 | 3.28E-05 | 0.000183 |
| SPRYD7       | <a href="#">113251311</a> | 2.94269936  | 1.55714  | 0.0003   | 0.001339 |
| DNPEP        | <a href="#">113250427</a> | 2.941216489 | 1.556413 | 9.72E-05 | 0.000489 |
| GARNL3       | <a href="#">113266425</a> | 2.940251845 | 1.55594  | 0.008053 | 0.023333 |
| MITF         | <a href="#">113257074</a> | 2.939075273 | 1.555362 | 0.000393 | 0.001694 |
| HSPA12B      | <a href="#">113258381</a> | 2.936236129 | 1.553968 | 0.000656 | 0.002668 |
| GFRA1        | <a href="#">113251969</a> | 2.935761494 | 1.553735 | 0.00528  | 0.016329 |
| DNAJA4       | <a href="#">113263798</a> | 2.93492034  | 1.553321 | 9.03E-05 | 0.000457 |
| L3MBTL3      | <a href="#">113259438</a> | 2.934605628 | 1.553167 | 8E-05    | 0.00041  |
| ATP5PO       | <a href="#">113263260</a> | 2.93403816  | 1.552888 | 0.004122 | 0.013145 |
| LARP1B       | <a href="#">113255656</a> | 2.931840068 | 1.551806 | 3.52E-05 | 0.000195 |
| CHCHD1       | <a href="#">113259188</a> | 2.927282865 | 1.549562 | 0.000169 | 0.000801 |
| KYAT1        | <a href="#">113266490</a> | 2.923363805 | 1.547629 | 0.005628 | 0.017245 |
| LOC113242946 | <a href="#">113242946</a> | 2.919496922 | 1.54572  | 0.011755 | 0.032052 |
| KLHDC8B      | <a href="#">113256866</a> | 2.919411931 | 1.545678 | 0.00731  | 0.02149  |
| CCDC68       | <a href="#">113253439</a> | 2.918585813 | 1.545269 | 0.003667 | 0.011892 |

|              |                           |             |          |          |          |
|--------------|---------------------------|-------------|----------|----------|----------|
| LRR3B        | <a href="#">113253861</a> | 2.918402612 | 1.545179 | 0.003737 | 0.012089 |
| THRA         | <a href="#">113265499</a> | 2.918082629 | 1.545021 | 0.00027  | 0.001217 |
| BTBD6        | <a href="#">113267181</a> | 2.917702393 | 1.544833 | 0.001323 | 0.004922 |
| LRR4         | <a href="#">113263735</a> | 2.917198147 | 1.544583 | 0.001806 | 0.006441 |
| PHLDB2       | <a href="#">113251155</a> | 2.913497426 | 1.542752 | 0.000246 | 0.001119 |
| LOC113241998 | <a href="#">113241998</a> | 2.913488195 | 1.542747 | 0.000583 | 0.002408 |
| ADAMTSL1     | <a href="#">113260599</a> | 2.911099064 | 1.541564 | 0.001197 | 0.004504 |
| MTIF3        | <a href="#">113251204</a> | 2.910563068 | 1.541298 | 7.93E-05 | 0.000406 |
| USHBP1       | <a href="#">113256668</a> | 2.910311631 | 1.541174 | 0.001122 | 0.004256 |
| SMIM10L1     | <a href="#">113257883</a> | 2.907503736 | 1.539781 | 9.69E-05 | 0.000488 |
| PPP2R2D      | <a href="#">113252071</a> | 2.903817087 | 1.537951 | 0.000311 | 0.001381 |
| ZNF583       | <a href="#">113248544</a> | 2.900189723 | 1.536147 | 0.002551 | 0.008693 |
| TLE2         | <a href="#">113242769</a> | 2.898648816 | 1.535381 | 0.000139 | 0.000671 |
| NAXE         | <a href="#">113245227</a> | 2.8983189   | 1.535216 | 0.000183 | 0.000864 |
| TMEM126A     | <a href="#">113269391</a> | 2.896920576 | 1.53452  | 0.000331 | 0.001457 |
| LOC113245455 | <a href="#">113245455</a> | 2.895314031 | 1.53372  | 2.87E-05 | 0.000162 |
| DUSP10       | <a href="#">113268713</a> | 2.894576679 | 1.533352 | 0.000147 | 0.000708 |
| ASPCR1       | <a href="#">113244489</a> | 2.894098945 | 1.533114 | 0.001354 | 0.005019 |
| MTMR11       | <a href="#">113246122</a> | 2.89183422  | 1.531985 | 0.007635 | 0.022299 |
| AES          | <a href="#">113242788</a> | 2.890980216 | 1.531559 | 0.001257 | 0.004707 |
| LOC113265650 | <a href="#">113265650</a> | 2.889994747 | 1.531067 | 0.000199 | 0.000926 |
| APBB1        | <a href="#">113245850</a> | 2.888588584 | 1.530365 | 0.000398 | 0.001717 |
| SDHC         | <a href="#">113246688</a> | 2.888194773 | 1.530168 | 0.00285  | 0.00957  |
| KIF21A       | <a href="#">113257734</a> | 2.887569514 | 1.529856 | 0.001807 | 0.006444 |
| VPS9D1       | <a href="#">113252123</a> | 2.887557279 | 1.52985  | 0.000117 | 0.000579 |
| LOC113249791 | <a href="#">113249791</a> | 2.88730854  | 1.529725 | 0.004843 | 0.015169 |
| FST          | <a href="#">113263911</a> | 2.884834234 | 1.528488 | 0.008711 | 0.02488  |
| USP11        | <a href="#">113265969</a> | 2.883876225 | 1.528009 | 0.000546 | 0.002268 |

|              |                           |             |          |          |          |
|--------------|---------------------------|-------------|----------|----------|----------|
| OSBPL1A      | <a href="#">113253295</a> | 2.883243946 | 1.527693 | 0.001308 | 0.004874 |
| KDM4D        | <a href="#">113260162</a> | 2.88169687  | 1.526919 | 0.006911 | 0.020475 |
| PVR          | <a href="#">113243460</a> | 2.879585564 | 1.525861 | 0.001149 | 0.00435  |
| SLC47A2      | <a href="#">113271269</a> | 2.8791563   | 1.525646 | 0.008818 | 0.025143 |
| PSMG4        | <a href="#">113264402</a> | 2.877491927 | 1.524812 | 0.003848 | 0.012393 |
| PDCD5        | <a href="#">113244718</a> | 2.877340909 | 1.524736 | 0.000266 | 0.001198 |
| CLYBL        | <a href="#">113251501</a> | 2.877097215 | 1.524614 | 0.000728 | 0.002919 |
| THNSL2       | <a href="#">113242812</a> | 2.875942421 | 1.524035 | 0.00016  | 0.000763 |
| FRS3         | <a href="#">113261310</a> | 2.875317562 | 1.523721 | 0.000592 | 0.002436 |
| CPED1        | <a href="#">113263459</a> | 2.875250734 | 1.523688 | 0.001445 | 0.005315 |
| LOC113245523 | <a href="#">113245523</a> | 2.874889968 | 1.523507 | 0.000565 | 0.002337 |
| LOC113248542 | <a href="#">113248542</a> | 2.872694052 | 1.522404 | 0.001833 | 0.006522 |
| USH1C        | <a href="#">113246620</a> | 2.870756202 | 1.521431 | 0.008655 | 0.024745 |
| DUSP23       | <a href="#">113246655</a> | 2.869531271 | 1.520815 | 0.000873 | 0.003419 |
| ACP2         | <a href="#">113264970</a> | 2.869230846 | 1.520664 | 0.000158 | 0.000755 |
| KAT5         | <a href="#">113244098</a> | 2.868804899 | 1.52045  | 0.000119 | 0.000584 |
| ZFP92        | <a href="#">113247841</a> | 2.867292399 | 1.519689 | 0.008112 | 0.023467 |
| PYROXD2      | <a href="#">113251809</a> | 2.866435352 | 1.519258 | 0.005347 | 0.016519 |
| RTL10        | <a href="#">113245950</a> | 2.866365346 | 1.519223 | 0.001351 | 0.005013 |
| GATA6        | <a href="#">113253276</a> | 2.864077732 | 1.518071 | 0.012175 | 0.033026 |
| USP53        | <a href="#">113255610</a> | 2.862461563 | 1.517256 | 0.000126 | 0.000618 |
| MAB21L1      | <a href="#">113251254</a> | 2.8597858   | 1.515907 | 0.009872 | 0.027617 |
| DENND1B      | <a href="#">113242587</a> | 2.859505159 | 1.515766 | 0.001617 | 0.005857 |
| LRIG1        | <a href="#">113257056</a> | 2.858371338 | 1.515193 | 0.00987  | 0.027617 |
| DEAF1        | <a href="#">113248806</a> | 2.857667686 | 1.514838 | 8.56E-05 | 0.000436 |
| PRMT1        | <a href="#">113243287</a> | 2.856683873 | 1.514341 | 9.24E-05 | 0.000466 |
| RFK          | <a href="#">113269838</a> | 2.855092535 | 1.513538 | 0.000113 | 0.000559 |
| ATP5IF1      | <a href="#">113268421</a> | 2.852917366 | 1.512438 | 0.002292 | 0.007929 |

|              |                           |             |          |          |          |
|--------------|---------------------------|-------------|----------|----------|----------|
| ZNF662       | <a href="#">113253831</a> | 2.849905462 | 1.510914 | 0.001017 | 0.00391  |
| IARS2        | <a href="#">113268724</a> | 2.849463381 | 1.51069  | 0.000836 | 0.0033   |
| SERTAD4      | <a href="#">113262655</a> | 2.848330683 | 1.510117 | 0.019824 | 0.049863 |
| SMYD2        | <a href="#">113262691</a> | 2.848065215 | 1.509982 | 8.94E-05 | 0.000453 |
| LOC113248302 | <a href="#">113248302</a> | 2.845539536 | 1.508702 | 0.000848 | 0.00334  |
| STUB1        | <a href="#">113245397</a> | 2.844908975 | 1.508382 | 0.000667 | 0.002704 |
| PACS2        | <a href="#">113267179</a> | 2.839461873 | 1.505618 | 0.000345 | 0.001511 |
| UBXN1        | <a href="#">113246911</a> | 2.838427217 | 1.505092 | 0.000201 | 0.000936 |
| THAP12       | <a href="#">113269339</a> | 2.838329417 | 1.505042 | 0.000511 | 0.002142 |
| RAB40B       | <a href="#">113244465</a> | 2.83753057  | 1.504636 | 0.005138 | 0.015963 |
| ABLIM3       | <a href="#">113263929</a> | 2.833253489 | 1.50246  | 0.008185 | 0.023616 |
| EIF4E3       | <a href="#">113257082</a> | 2.831513015 | 1.501573 | 0.000257 | 0.001164 |
| PALM         | <a href="#">113242702</a> | 2.831354661 | 1.501492 | 0.004201 | 0.013364 |
| HMGCLL1      | <a href="#">113261167</a> | 2.830764188 | 1.501192 | 0.009027 | 0.025627 |
| CXCL14       | <a href="#">113261492</a> | 2.826119282 | 1.498822 | 0.0006   | 0.002464 |
| FOXO4        | <a href="#">113245656</a> | 2.825672457 | 1.498594 | 9.44E-05 | 0.000476 |
| NUDT6        | <a href="#">113255639</a> | 2.823321547 | 1.497393 | 0.000174 | 0.000823 |
| SLC43A1      | <a href="#">113246534</a> | 2.819761773 | 1.495573 | 7.82E-05 | 0.000401 |
| SAR1B        | <a href="#">113261745</a> | 2.817270929 | 1.494298 | 0.001116 | 0.004234 |
| TIMM13       | <a href="#">113242767</a> | 2.816740185 | 1.494026 | 0.000191 | 0.000894 |
| COQ3         | <a href="#">113264805</a> | 2.816310879 | 1.493807 | 0.000366 | 0.001594 |
| CFAP58       | <a href="#">113251623</a> | 2.813905165 | 1.492574 | 0.003322 | 0.010932 |
| NOD1         | <a href="#">113262332</a> | 2.81337358  | 1.492301 | 5.25E-05 | 0.000281 |
| POLR1E       | <a href="#">113260444</a> | 2.81193223  | 1.491562 | 6.06E-05 | 0.00032  |
| LOC113246836 | <a href="#">113246836</a> | 2.811013111 | 1.49109  | 0.007408 | 0.021724 |
| ITGB8        | <a href="#">113261164</a> | 2.810524774 | 1.49084  | 0.007735 | 0.022547 |
| FBXL17       | <a href="#">113255014</a> | 2.806189301 | 1.488612 | 4.15E-05 | 0.000225 |
| NKIRAS1      | <a href="#">113253873</a> | 2.804711617 | 1.487852 | 0.001512 | 0.005535 |

|             |                           |             |          |          |          |
|-------------|---------------------------|-------------|----------|----------|----------|
| OPN1SW      | <a href="#">113263870</a> | 2.804583554 | 1.487787 | 0.008516 | 0.024405 |
| FKRP        | <a href="#">113243391</a> | 2.802230364 | 1.486576 | 6.49E-05 | 0.000339 |
| LURAP1      | <a href="#">113254728</a> | 2.801988129 | 1.486451 | 0.005938 | 0.018069 |
| RPS28       | <a href="#">113242905</a> | 2.801091137 | 1.485989 | 0.008745 | 0.024959 |
| DCXR        | <a href="#">113244486</a> | 2.800603058 | 1.485738 | 0.000935 | 0.003633 |
| GCSH        | <a href="#">113252527</a> | 2.800183062 | 1.485521 | 0.003667 | 0.011892 |
| LRPPRC      | <a href="#">113246283</a> | 2.800156925 | 1.485508 | 0.003626 | 0.011793 |
| FIBIN       | <a href="#">113265095</a> | 2.79973605  | 1.485291 | 0.0028   | 0.009438 |
| CCSER2      | <a href="#">113259236</a> | 2.799554721 | 1.485197 | 0.000737 | 0.002953 |
| PSEN2       | <a href="#">113262931</a> | 2.795198781 | 1.482951 | 5.56E-05 | 0.000295 |
| NFIB        | <a href="#">113260613</a> | 2.795157034 | 1.482929 | 0.003377 | 0.011077 |
| EIF2A       | <a href="#">113254058</a> | 2.794226593 | 1.482449 | 0.000892 | 0.003486 |
| HTR1B       | <a href="#">113261102</a> | 2.793797258 | 1.482227 | 0.018017 | 0.046033 |
| SHANK3      | <a href="#">113241594</a> | 2.79354764  | 1.482098 | 0.000203 | 0.000941 |
| SLC39A2     | <a href="#">113248487</a> | 2.790749426 | 1.480653 | 0.006009 | 0.018262 |
| MARS2       | <a href="#">113250623</a> | 2.789786053 | 1.480154 | 0.000561 | 0.002323 |
| STARD7      | <a href="#">113241969</a> | 2.789785696 | 1.480154 | 0.002021 | 0.007094 |
| LSM14B      | <a href="#">113258785</a> | 2.789705375 | 1.480113 | 2.93E-05 | 0.000165 |
| TIMM8B      | <a href="#">113260055</a> | 2.788768646 | 1.479628 | 0.000281 | 0.001259 |
| PGP         | <a href="#">113245113</a> | 2.787390235 | 1.478915 | 0.000244 | 0.001112 |
| SYNGR2      | <a href="#">113244572</a> | 2.786576912 | 1.478494 | 0.000808 | 0.003198 |
| SOX8        | <a href="#">113245394</a> | 2.786111226 | 1.478253 | 0.005526 | 0.016982 |
| RDH5        | <a href="#">113256460</a> | 2.786091712 | 1.478243 | 0.006679 | 0.019937 |
| ZCCHC24     | <a href="#">113259220</a> | 2.785344893 | 1.477856 | 0.000496 | 0.002083 |
| MTUS1       | <a href="#">113262156</a> | 2.785128402 | 1.477744 | 0.007893 | 0.022948 |
| MRPL34      | <a href="#">113256673</a> | 2.776683984 | 1.473363 | 0.000734 | 0.002944 |
| PSMC3       | <a href="#">113264959</a> | 2.776673875 | 1.473358 | 0.000691 | 0.002791 |
| CUNH11orf94 | <a href="#">113264998</a> | 2.775642318 | 1.472822 | 0.012065 | 0.032766 |

|              |                           |             |          |          |          |
|--------------|---------------------------|-------------|----------|----------|----------|
| PPP1R14B     | <a href="#">113244179</a> | 2.77503988  | 1.472509 | 0.000957 | 0.003706 |
| MRPL11       | <a href="#">113244065</a> | 2.774259528 | 1.472103 | 0.000456 | 0.001929 |
| ZNHIT2       | <a href="#">113244132</a> | 2.773840008 | 1.471885 | 0.000182 | 0.000858 |
| ABCC2        | <a href="#">113251819</a> | 2.773251518 | 1.471578 | 0.005678 | 0.017384 |
| ARHGEF15     | <a href="#">113271183</a> | 2.772692735 | 1.471288 | 0.000658 | 0.002674 |
| AKT1S1       | <a href="#">113243278</a> | 2.770359677 | 1.470073 | 0.00129  | 0.004812 |
| LOC113257828 | <a href="#">113257828</a> | 2.769482881 | 1.469617 | 0.000444 | 0.001884 |
| SNRPN        | <a href="#">113263595</a> | 2.767657817 | 1.468666 | 0.002025 | 0.007106 |
| KLF2         | <a href="#">113256645</a> | 2.766123411 | 1.467866 | 0.000154 | 0.000738 |
| ACVR2A       | <a href="#">113250906</a> | 2.765061207 | 1.467311 | 0.001976 | 0.006956 |
| LOC113249995 | <a href="#">113249995</a> | 2.764735173 | 1.467141 | 0.004745 | 0.014883 |
| ANKRD53      | <a href="#">113244188</a> | 2.763558236 | 1.466527 | 0.00486  | 0.015196 |
| NTAN1        | <a href="#">113270768</a> | 2.76154135  | 1.465474 | 0.000363 | 0.001578 |
| TMEM94       | <a href="#">113244634</a> | 2.760900033 | 1.465139 | 5.41E-05 | 0.000287 |
| GATC         | <a href="#">113267042</a> | 2.760692971 | 1.46503  | 0.000374 | 0.001624 |
| HSD17B8      | <a href="#">113243793</a> | 2.759606558 | 1.464463 | 0.000187 | 0.000876 |
| RRM2B        | <a href="#">113252861</a> | 2.753958932 | 1.461507 | 0.000329 | 0.001451 |
| ELOB         | <a href="#">113245416</a> | 2.753279535 | 1.461151 | 0.000686 | 0.002772 |
| APPL2        | <a href="#">113256053</a> | 2.750749363 | 1.459825 | 0.001015 | 0.003902 |
| SNRNP25      | <a href="#">113245172</a> | 2.749923821 | 1.459392 | 0.000121 | 0.000596 |
| ZNF365       | <a href="#">113259088</a> | 2.748556723 | 1.458674 | 0.0031   | 0.010285 |
| LOC113242771 | <a href="#">113242771</a> | 2.747428928 | 1.458082 | 0.004071 | 0.013003 |
| ETV7         | <a href="#">113243859</a> | 2.746515693 | 1.457603 | 0.018037 | 0.046076 |
| RASD1        | <a href="#">113271303</a> | 2.746160388 | 1.457416 | 0.001874 | 0.006645 |
| ISPD         | <a href="#">113260950</a> | 2.746087227 | 1.457377 | 0.004381 | 0.013849 |
| LOC113247766 | <a href="#">113247766</a> | 2.744715613 | 1.456657 | 0.004263 | 0.013538 |
| NKAPL        | <a href="#">113248162</a> | 2.744366229 | 1.456473 | 0.013088 | 0.035144 |
| MRPS16       | <a href="#">113259173</a> | 2.743139757 | 1.455828 | 0.000123 | 0.000601 |

|              |                           |             |          |          |          |
|--------------|---------------------------|-------------|----------|----------|----------|
| GPRASP1      | <a href="#">113244313</a> | 2.742820733 | 1.45566  | 0.014852 | 0.039145 |
| ZNF25        | <a href="#">113258958</a> | 2.741605915 | 1.455021 | 0.00039  | 0.001686 |
| LOC113252203 | <a href="#">113252203</a> | 2.740667593 | 1.454527 | 0.000285 | 0.001276 |
| CD99L2       | <a href="#">113246822</a> | 2.73968058  | 1.454008 | 0.002996 | 0.010008 |
| CX3CL1       | <a href="#">113252283</a> | 2.739317228 | 1.453816 | 0.007124 | 0.021028 |
| TRIM3        | <a href="#">113245858</a> | 2.737538772 | 1.452879 | 0.002452 | 0.008404 |
| LOC113245502 | <a href="#">113245502</a> | 2.737483985 | 1.452851 | 0.000184 | 0.000865 |
| SEMA6A       | <a href="#">113261619</a> | 2.734838206 | 1.451455 | 0.000199 | 0.000926 |
| METAP1       | <a href="#">113263122</a> | 2.733324154 | 1.450657 | 0.000323 | 0.001427 |
| HABP4        | <a href="#">113269773</a> | 2.728440448 | 1.448077 | 0.000495 | 0.002083 |
| SMTN         | <a href="#">113245049</a> | 2.7277959   | 1.447736 | 0.000224 | 0.001031 |
| S100A13      | <a href="#">113245338</a> | 2.724239579 | 1.445854 | 0.000407 | 0.001748 |
| VMO1         | <a href="#">113271087</a> | 2.723303807 | 1.445358 | 0.017753 | 0.045462 |
| NAT14        | <a href="#">113247427</a> | 2.722950948 | 1.445171 | 0.008305 | 0.023896 |
| MARCH9       | <a href="#">113256359</a> | 2.720545463 | 1.443896 | 0.000845 | 0.003327 |
| DRG2         | <a href="#">113271293</a> | 2.719660812 | 1.443427 | 0.000101 | 0.000504 |
| LOC113250465 | <a href="#">113250465</a> | 2.716306518 | 1.441646 | 0.000369 | 0.001602 |
| PDLIM1       | <a href="#">113251752</a> | 2.714350661 | 1.440607 | 0.001248 | 0.004676 |
| ENPP5        | <a href="#">113261237</a> | 2.713108734 | 1.439947 | 0.000356 | 0.001553 |
| HUS1         | <a href="#">113257638</a> | 2.710556982 | 1.438589 | 0.000861 | 0.003385 |
| MLH3         | <a href="#">113270322</a> | 2.710137689 | 1.438366 | 0.000737 | 0.002952 |
| SH3BP4       | <a href="#">113250314</a> | 2.707829001 | 1.437137 | 0.002206 | 0.007671 |
| BANF1        | <a href="#">113244083</a> | 2.704376322 | 1.435296 | 0.000347 | 0.001516 |
| POLR2M       | <a href="#">113269673</a> | 2.704156344 | 1.435179 | 0.000427 | 0.001819 |
| LOC113244925 | <a href="#">113244925</a> | 2.70369669  | 1.434933 | 0.000168 | 0.000797 |
| PCYT1A       | <a href="#">113252916</a> | 2.701390734 | 1.433702 | 0.000203 | 0.000942 |
| LOC113246337 | <a href="#">113246337</a> | 2.700568588 | 1.433263 | 0.001753 | 0.006275 |
| NINJ2        | <a href="#">113258034</a> | 2.700170122 | 1.43305  | 0.010105 | 0.028151 |

|              |                           |             |          |          |          |
|--------------|---------------------------|-------------|----------|----------|----------|
| CIAO2B       | <a href="#">113252339</a> | 2.700167581 | 1.433049 | 0.000227 | 0.001042 |
| MOB2         | <a href="#">113243948</a> | 2.696608749 | 1.431146 | 0.000262 | 0.001182 |
| SELENOK      | <a href="#">113256985</a> | 2.696058847 | 1.430852 | 0.000332 | 0.001459 |
| CD59         | <a href="#">113265058</a> | 2.6940546   | 1.429779 | 0.007293 | 0.021452 |
| FER1L6       | <a href="#">113252749</a> | 2.691273961 | 1.428289 | 0.008612 | 0.024644 |
| ETFBKMT      | <a href="#">113257750</a> | 2.690743813 | 1.428005 | 0.002052 | 0.007193 |
| SYP          | <a href="#">113265951</a> | 2.690571135 | 1.427912 | 0.006351 | 0.019124 |
| STAC         | <a href="#">113253765</a> | 3.205029479 | 1.680338 | 0.013498 | 0.036046 |
| SLC25A42     | <a href="#">113256741</a> | 3.203746704 | 1.67976  | 0.002398 | 0.008235 |
| SQSTM1       | <a href="#">113261555</a> | 3.20347816  | 1.679639 | 0.002571 | 0.008752 |
| TCTA         | <a href="#">113256877</a> | 3.203353044 | 1.679583 | 1.4E-05  | 8.55E-05 |
| RITA1        | <a href="#">113266990</a> | 3.202574242 | 1.679232 | 1.28E-05 | 7.86E-05 |
| CDC37L1      | <a href="#">113270165</a> | 3.198859087 | 1.677557 | 2.56E-06 | 1.82E-05 |
| ISLR         | <a href="#">113240961</a> | 3.197064578 | 1.676748 | 0.000753 | 0.00301  |
| TSPAN3       | <a href="#">113241005</a> | 3.193557791 | 1.675165 | 0.000507 | 0.002125 |
| HES4         | <a href="#">113270655</a> | 3.192903465 | 1.674869 | 4.17E-05 | 0.000226 |
| L2HGDH       | <a href="#">113266207</a> | 3.192701414 | 1.674778 | 4.56E-05 | 0.000246 |
| SH3GL3       | <a href="#">113263757</a> | 3.191801043 | 1.674371 | 0.001704 | 0.006125 |
| CUNH16orf95  | <a href="#">113252171</a> | 3.187520806 | 1.672435 | 0.010321 | 0.028684 |
| NOV          | <a href="#">113252778</a> | 3.18730676  | 1.672338 | 0.005888 | 0.017944 |
| LOC113271076 | <a href="#">113271076</a> | 3.183638048 | 1.670676 | 0.006671 | 0.019916 |
| RTN4         | <a href="#">113245629</a> | 3.183131295 | 1.670447 | 0.01305  | 0.035064 |
| GPIHBP1      | <a href="#">113247595</a> | 3.18062491  | 1.66931  | 0.0023   | 0.007948 |
| ITGA3        | <a href="#">113265609</a> | 3.18030223  | 1.669164 | 0.000486 | 0.002047 |
| LOC113270384 | <a href="#">113270384</a> | 3.180292033 | 1.669159 | 0.000119 | 0.000587 |
| WSB2         | <a href="#">113267016</a> | 3.180198765 | 1.669117 | 8.34E-05 | 0.000426 |
| RUNDC3B      | <a href="#">113259507</a> | 3.179494246 | 1.668797 | 4.68E-05 | 0.000252 |
| DLGAP1       | <a href="#">113253243</a> | 3.179394387 | 1.668752 | 0.002276 | 0.007879 |

|              |                           |             |          |          |          |
|--------------|---------------------------|-------------|----------|----------|----------|
| LOC113247252 | <a href="#">113247252</a> | 3.175718691 | 1.667083 | 0.003653 | 0.011857 |
| AGMO         | <a href="#">113260890</a> | 3.174381325 | 1.666475 | 0.006392 | 0.019223 |
| TCEAL1       | <a href="#">113249836</a> | 3.173393193 | 1.666026 | 4.06E-05 | 0.000221 |
| LOC113246566 | <a href="#">113246566</a> | 3.17200725  | 1.665396 | 5.81E-05 | 0.000307 |
| LOC113249742 | <a href="#">113249742</a> | 3.170074408 | 1.664517 | 3.01E-05 | 0.000169 |
| CMC4         | <a href="#">113248350</a> | 3.169996927 | 1.664481 | 0.000369 | 0.001602 |
| SPARCL1      | <a href="#">113263168</a> | 3.168479972 | 1.663791 | 0.00688  | 0.020393 |
| CUNH8orf59   | <a href="#">113252990</a> | 3.167856619 | 1.663507 | 2.91E-05 | 0.000164 |
| HOXB8        | <a href="#">113265579</a> | 3.166925327 | 1.663083 | 0.013044 | 0.035057 |
| NRIP2        | <a href="#">113258024</a> | 3.166214322 | 1.662759 | 0.004041 | 0.012929 |
| RSL24D1      | <a href="#">113269645</a> | 3.16592679  | 1.662628 | 7.27E-06 | 4.74E-05 |
| N4BP2L2      | <a href="#">113251246</a> | 3.165777312 | 1.66256  | 1.9E-05  | 0.000112 |
| EPB41L4A     | <a href="#">113254993</a> | 3.165122854 | 1.662261 | 2.78E-05 | 0.000158 |
| PARP6        | <a href="#">113240936</a> | 3.165115072 | 1.662258 | 7.75E-06 | 5.02E-05 |
| CCDC127      | <a href="#">113260770</a> | 3.164643826 | 1.662043 | 2.45E-05 | 0.00014  |
| LOC113249961 | <a href="#">113249961</a> | 3.16102192  | 1.660391 | 0.001924 | 0.006793 |
| CRADD        | <a href="#">113256160</a> | 3.15696846  | 1.65854  | 0.000787 | 0.003125 |
| PPP1R3B      | <a href="#">113262116</a> | 3.155693908 | 1.657957 | 0.001434 | 0.005279 |
| SNX21        | <a href="#">113258661</a> | 3.152923641 | 1.65669  | 0.000715 | 0.002875 |
| CXXC5        | <a href="#">113261811</a> | 3.149974377 | 1.65534  | 4.74E-06 | 3.21E-05 |
| UBAP1L       | <a href="#">113240866</a> | 3.148494603 | 1.654662 | 0.003127 | 0.010372 |
| RTN4RL1      | <a href="#">113268835</a> | 3.148352228 | 1.654597 | 0.006576 | 0.019686 |
| PTPRM        | <a href="#">113253224</a> | 3.147507696 | 1.65421  | 0.000406 | 0.001747 |
| LOC113268544 | <a href="#">113268544</a> | 3.145088594 | 1.653101 | 3.82E-05 | 0.00021  |
| CCL21        | <a href="#">113260498</a> | 3.143514349 | 1.652378 | 0.007823 | 0.022777 |
| ZHX2         | <a href="#">113252762</a> | 3.138849228 | 1.650236 | 0.000123 | 0.000601 |
| FOXN3        | <a href="#">113267374</a> | 3.136606716 | 1.649205 | 1.47E-05 | 8.91E-05 |
| NUDT13       | <a href="#">113259171</a> | 3.128458385 | 1.645452 | 0.000299 | 0.001334 |

|              |                           |             |          |          |          |
|--------------|---------------------------|-------------|----------|----------|----------|
| LARGE1       | <a href="#">113256015</a> | 3.127513933 | 1.645016 | 0.008572 | 0.024544 |
| EMCN         | <a href="#">113263107</a> | 3.124377145 | 1.643569 | 2.59E-05 | 0.000148 |
| LOC113253436 | <a href="#">113253436</a> | 3.123275119 | 1.64306  | 0.008909 | 0.025359 |
| TMEM236      | <a href="#">113241363</a> | 3.123263769 | 1.643054 | 0.001395 | 0.005153 |
| SLC45A3      | <a href="#">113242479</a> | 3.123023743 | 1.642944 | 0.001883 | 0.006671 |
| ZNF385C      | <a href="#">113265680</a> | 3.122282027 | 1.642601 | 0.005295 | 0.01637  |
| ALKBH8       | <a href="#">113260110</a> | 3.121870715 | 1.642411 | 0.001384 | 0.005121 |
| PCDH19       | <a href="#">113244289</a> | 3.115815013 | 1.63961  | 0.00244  | 0.008369 |
| SLC18B1      | <a href="#">113259462</a> | 3.114702259 | 1.639094 | 0.000133 | 0.000644 |
| BOD1         | <a href="#">113264110</a> | 3.113880542 | 1.638714 | 0.000369 | 0.001602 |
| SBSPON       | <a href="#">113253052</a> | 3.113493738 | 1.638534 | 0.004117 | 0.013133 |
| NDUFA13      | <a href="#">113256757</a> | 3.111234702 | 1.637487 | 0.000117 | 0.000578 |
| NRBF2        | <a href="#">113259094</a> | 3.10769837  | 1.635846 | 9.48E-05 | 0.000478 |
| PRXL2B       | <a href="#">113270607</a> | 3.105641184 | 1.634891 | 0.000725 | 0.002911 |
| RNF7         | <a href="#">113254010</a> | 3.104978476 | 1.634583 | 5.11E-05 | 0.000274 |
| DNAJC28      | <a href="#">113264408</a> | 3.10462868  | 1.634421 | 0.000128 | 0.000625 |
| CAPN12       | <a href="#">113243610</a> | 3.100449573 | 1.632477 | 0.004223 | 0.013424 |
| CARD10       | <a href="#">113241807</a> | 3.099355978 | 1.631968 | 0.000917 | 0.003567 |
| LOC113249681 | <a href="#">113249681</a> | 3.098280033 | 1.631468 | 0.001884 | 0.006674 |
| VOPP1        | <a href="#">113257409</a> | 3.097741038 | 1.631217 | 0.004617 | 0.014528 |
| LIMD1        | <a href="#">113256777</a> | 3.097736055 | 1.631214 | 3.14E-05 | 0.000175 |
| RPL38        | <a href="#">113265208</a> | 3.096636073 | 1.630702 | 0.001757 | 0.006281 |
| YPEL1        | <a href="#">113247045</a> | 3.093371988 | 1.62918  | 8.11E-05 | 0.000416 |
| AR           | <a href="#">113245650</a> | 3.092719756 | 1.628876 | 3.91E-05 | 0.000214 |
| LOC113248605 | <a href="#">113248605</a> | 3.090354863 | 1.627773 | 0.001261 | 0.004721 |
| MAN2A2       | <a href="#">113263716</a> | 3.089952192 | 1.627585 | 8.81E-05 | 0.000448 |
| NCALD        | <a href="#">113252864</a> | 3.089374358 | 1.627315 | 0.00385  | 0.012393 |
| ZNF76        | <a href="#">113243840</a> | 3.089250653 | 1.627257 | 2.22E-05 | 0.000129 |

|              |                           |             |          |          |          |
|--------------|---------------------------|-------------|----------|----------|----------|
| COPS3        | <a href="#">113271306</a> | 3.088961464 | 1.627122 | 2.2E-05  | 0.000128 |
| VEGFA        | <a href="#">113261040</a> | 3.088011465 | 1.626678 | 0.0001   | 0.000503 |
| PDE7B        | <a href="#">113259477</a> | 3.087595446 | 1.626484 | 1.6E-05  | 9.6E-05  |
| TM4SF1       | <a href="#">113254048</a> | 3.084033852 | 1.624819 | 0.000682 | 0.002763 |
| TOMM7        | <a href="#">113261301</a> | 3.08198868  | 1.623862 | 7.41E-05 | 0.000383 |
| VEZT         | <a href="#">113256140</a> | 3.081964155 | 1.62385  | 3.8E-05  | 0.000209 |
| PBX1         | <a href="#">113268685</a> | 3.08132823  | 1.623552 | 1.42E-05 | 8.63E-05 |
| RHOBTB2      | <a href="#">113269988</a> | 3.078871668 | 1.622402 | 6.48E-05 | 0.000339 |
| ARHGAP29     | <a href="#">113254388</a> | 3.076986041 | 1.621518 | 0.000246 | 0.00112  |
| DMWD         | <a href="#">113243413</a> | 3.075466176 | 1.620805 | 0.000118 | 0.00058  |
| LOC113261640 | <a href="#">113261640</a> | 3.074625005 | 1.62041  | 0.003889 | 0.012499 |
| AMT          | <a href="#">113256872</a> | 3.07061378  | 1.618527 | 0.000723 | 0.002904 |
| LOC113257493 | <a href="#">113257493</a> | 3.070480985 | 1.618465 | 0.005897 | 0.017965 |
| SLIRP        | <a href="#">113270282</a> | 3.070346893 | 1.618402 | 8.82E-05 | 0.000448 |
| TMLHE        | <a href="#">113248335</a> | 3.066465787 | 1.616577 | 0.000237 | 0.001082 |
| GUCY1A2      | <a href="#">113260215</a> | 3.064568545 | 1.615684 | 0.004317 | 0.013677 |
| PLB1         | <a href="#">113267984</a> | 3.061448905 | 1.614215 | 0.011304 | 0.030966 |
| LOC113243636 | <a href="#">113243636</a> | 3.059412963 | 1.613255 | 5.29E-05 | 0.000282 |
| NDUFA7       | <a href="#">113242904</a> | 3.058628647 | 1.612885 | 3.51E-05 | 0.000194 |
| TMED1        | <a href="#">113243002</a> | 3.057609485 | 1.612404 | 7.91E-05 | 0.000406 |
| LYRM1        | <a href="#">113267537</a> | 3.056264922 | 1.61177  | 0.003377 | 0.011077 |
| ST3GAL3      | <a href="#">113254779</a> | 3.055638811 | 1.611474 | 1.61E-05 | 9.67E-05 |
| SCMH1        | <a href="#">113254820</a> | 3.053364966 | 1.6104   | 0.000228 | 0.001045 |
| USP25        | <a href="#">113244784</a> | 3.051220059 | 1.609386 | 2E-05    | 0.000117 |
| SORCS2       | <a href="#">113245719</a> | 3.049896892 | 1.60876  | 0.001735 | 0.006222 |
| GNG7         | <a href="#">113242789</a> | 3.049512409 | 1.608579 | 0.00028  | 0.001257 |
| MAP4K3       | <a href="#">113241667</a> | 3.04813507  | 1.607927 | 7.15E-06 | 4.67E-05 |
| PDGFB        | <a href="#">113241764</a> | 3.047850226 | 1.607792 | 0.001582 | 0.005755 |

|              |                           |             |          |          |          |
|--------------|---------------------------|-------------|----------|----------|----------|
| TRIAP1       | <a href="#">113267045</a> | 3.047335792 | 1.607548 | 2.77E-05 | 0.000157 |
| MTFR1L       | <a href="#">113268482</a> | 3.047187335 | 1.607478 | 5.44E-05 | 0.000289 |
| FSCN2        | <a href="#">113244518</a> | 3.046949897 | 1.607366 | 0.004356 | 0.013784 |
| CLDN5        | <a href="#">113245974</a> | 3.042604861 | 1.605307 | 0.001608 | 0.005828 |
| PSMG3        | <a href="#">113247741</a> | 3.040650957 | 1.60438  | 5.3E-05  | 0.000282 |
| OTUD4        | <a href="#">113255723</a> | 3.04010752  | 1.604122 | 5.45E-05 | 0.000289 |
| HADHA        | <a href="#">113270772</a> | 3.037818145 | 1.603036 | 0.005896 | 0.017965 |
| ARHGAP20     | <a href="#">113260078</a> | 3.036761746 | 1.602534 | 0.00105  | 0.004018 |
| CMC1         | <a href="#">113253855</a> | 3.03418237  | 1.601308 | 0.000117 | 0.000579 |
| FOXP3        | <a href="#">113265955</a> | 3.034167155 | 1.601301 | 0.002717 | 0.009185 |
| GABBR2       | <a href="#">113260410</a> | 3.033035157 | 1.600762 | 0.004718 | 0.014813 |
| SPATA25      | <a href="#">113258663</a> | 3.031651749 | 1.600104 | 0.004054 | 0.012959 |
| ISCU         | <a href="#">113267071</a> | 3.031013367 | 1.5998   | 0.001177 | 0.004438 |
| PARP3        | <a href="#">113256932</a> | 3.026914092 | 1.597848 | 0.01965  | 0.049571 |
| IL17RD       | <a href="#">113256999</a> | 3.026326726 | 1.597568 | 0.005218 | 0.016178 |
| KCNJ8        | <a href="#">113257805</a> | 3.026287878 | 1.597549 | 0.003619 | 0.011776 |
| EFCAB2       | <a href="#">113262948</a> | 3.021602339 | 1.595314 | 7.31E-05 | 0.000379 |
| MEOX2        | <a href="#">113260901</a> | 3.02123643  | 1.595139 | 0.002503 | 0.008555 |
| HS3ST2       | <a href="#">113267566</a> | 3.021017279 | 1.595034 | 0.001918 | 0.006776 |
| LOC113247899 | <a href="#">113247899</a> | 3.01898878  | 1.594065 | 0.000404 | 0.001738 |
| MVB12B       | <a href="#">113266416</a> | 3.017825097 | 1.593509 | 3.04E-05 | 0.00017  |
| CPT2         | <a href="#">113254653</a> | 3.010955135 | 1.590221 | 0.000871 | 0.003415 |
| TNFRSF9      | <a href="#">113270556</a> | 3.0090342   | 1.589301 | 0.000596 | 0.002449 |
| PATL1        | <a href="#">113248883</a> | 3.007148392 | 1.588396 | 3.04E-05 | 0.00017  |
| TMEM8B       | <a href="#">113260461</a> | 3.007100132 | 1.588373 | 0.000592 | 0.002438 |
| SGCG         | <a href="#">113251183</a> | 3.007094587 | 1.58837  | 0.015773 | 0.041262 |
| SLC7A6       | <a href="#">113252404</a> | 3.007052225 | 1.58835  | 7.14E-05 | 0.00037  |
| SHISA8       | <a href="#">113241716</a> | 3.006590546 | 1.588128 | 0.011706 | 0.031939 |

|              |                           |             |          |          |          |
|--------------|---------------------------|-------------|----------|----------|----------|
| NGAMT1       | <a href="#">113268381</a> | 3.004651186 | 1.587198 | 0.000104 | 0.000518 |
| TMEM147      | <a href="#">113244830</a> | 3.003625296 | 1.586705 | 0.00049  | 0.002062 |
| KCNJ16       | <a href="#">113265225</a> | 3.002202817 | 1.586021 | 0.005876 | 0.01792  |
| PEX5         | <a href="#">113257939</a> | 3.001294996 | 1.585585 | 7.73E-05 | 0.000397 |
| SDHAF3       | <a href="#">113260440</a> | 3.000598165 | 1.58525  | 0.000521 | 0.002176 |
| MRPL19       | <a href="#">113243374</a> | 2.997723905 | 1.583868 | 0.000378 | 0.001639 |
| IMPA2        | <a href="#">113245922</a> | 2.997096942 | 1.583566 | 3.14E-05 | 0.000175 |
| ANGPT4       | <a href="#">113258433</a> | 2.996431864 | 1.583246 | 0.000148 | 0.000711 |
| RGS11        | <a href="#">113245366</a> | 2.993369447 | 1.58177  | 0.003204 | 0.010593 |
| RPL30        | <a href="#">113252895</a> | 2.99263702  | 1.581417 | 0.019658 | 0.049573 |
| YAP1         | <a href="#">113259721</a> | 2.992505241 | 1.581354 | 0.000161 | 0.000769 |
| SELENOW      | <a href="#">113243361</a> | 2.990183274 | 1.580234 | 5.33E-05 | 0.000284 |
| PTOV1        | <a href="#">113243281</a> | 2.989402743 | 1.579857 | 0.000122 | 0.000599 |
| MNAT1        | <a href="#">113242407</a> | 2.98846362  | 1.579404 | 4.73E-05 | 0.000255 |
| DMAC2        | <a href="#">113243534</a> | 2.985978266 | 1.578204 | 4.45E-05 | 0.000241 |
| SNTA1        | <a href="#">113258493</a> | 2.978898336 | 1.574779 | 0.007595 | 0.02222  |
| LHFPL1       | <a href="#">113241246</a> | 2.977397011 | 1.574052 | 0.004399 | 0.013897 |
| ESAM         | <a href="#">113259915</a> | 2.973636336 | 1.572228 | 0.000103 | 0.000513 |
| CREB5        | <a href="#">113262153</a> | 2.971958151 | 1.571414 | 0.002347 | 0.008081 |
| NDUFV3       | <a href="#">113254594</a> | 2.97096868  | 1.570933 | 6.08E-05 | 0.00032  |
| ZNF532       | <a href="#">113253462</a> | 2.965553097 | 1.568301 | 2E-05    | 0.000117 |
| NDST1        | <a href="#">113263951</a> | 2.965256413 | 1.568157 | 3.91E-05 | 0.000214 |
| LOC113248316 | <a href="#">113248316</a> | 2.960585158 | 1.565882 | 0.000394 | 0.001698 |
| TRMT10C      | <a href="#">113250698</a> | 2.959536003 | 1.565371 | 0.000251 | 0.001138 |
| DNAJC21      | <a href="#">113260878</a> | 2.958566218 | 1.564898 | 2.44E-05 | 0.00014  |
| MRS2         | <a href="#">113264337</a> | 2.958544357 | 1.564888 | 0.001212 | 0.004558 |
| LOC113242682 | <a href="#">113242682</a> | 2.957615628 | 1.564435 | 0.004298 | 0.013627 |
| SMIM11A      | <a href="#">113262792</a> | 2.956998962 | 1.564134 | 8.48E-05 | 0.000432 |

|              |                           |             |          |          |          |
|--------------|---------------------------|-------------|----------|----------|----------|
| HEY1         | <a href="#">113253020</a> | 2.954742827 | 1.563033 | 0.000919 | 0.003576 |
| USP24        | <a href="#">113254622</a> | 2.954093942 | 1.562716 | 0.000761 | 0.003036 |
| SESN1        | <a href="#">113264757</a> | 2.950433559 | 1.560927 | 0.000187 | 0.000879 |
| MBNL2        | <a href="#">113251479</a> | 2.950423602 | 1.560922 | 0.004415 | 0.013945 |
| AFDN         | <a href="#">113247099</a> | 2.94858014  | 1.56002  | 0.000191 | 0.000892 |
| NOSTRIN      | <a href="#">113250810</a> | 2.947519223 | 1.559501 | 0.009267 | 0.026214 |
| KEAP1        | <a href="#">113242989</a> | 2.947263427 | 1.559376 | 0.000882 | 0.003448 |
| HYKK         | <a href="#">113263805</a> | 2.945437606 | 1.558482 | 0.003228 | 0.010653 |
| SLC3A1       | <a href="#">113246247</a> | 2.944148651 | 1.557851 | 0.000513 | 0.002148 |
| FTO          | <a href="#">113252242</a> | 2.9435233   | 1.557544 | 3.28E-05 | 0.000183 |
| SPRYD7       | <a href="#">113251311</a> | 2.94269936  | 1.55714  | 0.0003   | 0.001339 |
| DNPEP        | <a href="#">113250427</a> | 2.941216489 | 1.556413 | 9.72E-05 | 0.000489 |
| GARNL3       | <a href="#">113266425</a> | 2.940251845 | 1.55594  | 0.008053 | 0.023333 |
| MITF         | <a href="#">113257074</a> | 2.939075273 | 1.555362 | 0.000393 | 0.001694 |
| HSPA12B      | <a href="#">113258381</a> | 2.936236129 | 1.553968 | 0.000656 | 0.002668 |
| GFRA1        | <a href="#">113251969</a> | 2.935761494 | 1.553735 | 0.00528  | 0.016329 |
| DNAJA4       | <a href="#">113263798</a> | 2.93492034  | 1.553321 | 9.03E-05 | 0.000457 |
| L3MBTL3      | <a href="#">113259438</a> | 2.934605628 | 1.553167 | 8E-05    | 0.00041  |
| ATP5PO       | <a href="#">113263260</a> | 2.93403816  | 1.552888 | 0.004122 | 0.013145 |
| LARP1B       | <a href="#">113255656</a> | 2.931840068 | 1.551806 | 3.52E-05 | 0.000195 |
| CHCHD1       | <a href="#">113259188</a> | 2.927282865 | 1.549562 | 0.000169 | 0.000801 |
| KYAT1        | <a href="#">113266490</a> | 2.923363805 | 1.547629 | 0.005628 | 0.017245 |
| LOC113242946 | <a href="#">113242946</a> | 2.919496922 | 1.54572  | 0.011755 | 0.032052 |
| KLHDC8B      | <a href="#">113256866</a> | 2.919411931 | 1.545678 | 0.00731  | 0.02149  |
| CCDC68       | <a href="#">113253439</a> | 2.918585813 | 1.545269 | 0.003667 | 0.011892 |
| LRRC3B       | <a href="#">113253861</a> | 2.918402612 | 1.545179 | 0.003737 | 0.012089 |
| THRA         | <a href="#">113265499</a> | 2.918082629 | 1.545021 | 0.00027  | 0.001217 |
| BTBD6        | <a href="#">113267181</a> | 2.917702393 | 1.544833 | 0.001323 | 0.004922 |

|              |                           |             |          |          |          |
|--------------|---------------------------|-------------|----------|----------|----------|
| LRRC4        | <a href="#">113263735</a> | 2.917198147 | 1.544583 | 0.001806 | 0.006441 |
| PHLDB2       | <a href="#">113251155</a> | 2.913497426 | 1.542752 | 0.000246 | 0.001119 |
| LOC113241998 | <a href="#">113241998</a> | 2.913488195 | 1.542747 | 0.000583 | 0.002408 |
| ADAMTSL1     | <a href="#">113260599</a> | 2.911099064 | 1.541564 | 0.001197 | 0.004504 |
| MTIF3        | <a href="#">113251204</a> | 2.910563068 | 1.541298 | 7.93E-05 | 0.000406 |
| USHBP1       | <a href="#">113256668</a> | 2.910311631 | 1.541174 | 0.001122 | 0.004256 |
| SMIM10L1     | <a href="#">113257883</a> | 2.907503736 | 1.539781 | 9.69E-05 | 0.000488 |
| PPP2R2D      | <a href="#">113252071</a> | 2.903817087 | 1.537951 | 0.000311 | 0.001381 |
| ZNF583       | <a href="#">113248544</a> | 2.900189723 | 1.536147 | 0.002551 | 0.008693 |
| TLE2         | <a href="#">113242769</a> | 2.898648816 | 1.535381 | 0.000139 | 0.000671 |
| NAXE         | <a href="#">113245227</a> | 2.8983189   | 1.535216 | 0.000183 | 0.000864 |
| TMEM126A     | <a href="#">113269391</a> | 2.896920576 | 1.53452  | 0.000331 | 0.001457 |
| LOC113245455 | <a href="#">113245455</a> | 2.895314031 | 1.53372  | 2.87E-05 | 0.000162 |
| DUSP10       | <a href="#">113268713</a> | 2.894576679 | 1.533352 | 0.000147 | 0.000708 |
| ASPSCR1      | <a href="#">113244489</a> | 2.894098945 | 1.533114 | 0.001354 | 0.005019 |
| MTMR11       | <a href="#">113246122</a> | 2.89183422  | 1.531985 | 0.007635 | 0.022299 |
| AES          | <a href="#">113242788</a> | 2.890980216 | 1.531559 | 0.001257 | 0.004707 |
| LOC113265650 | <a href="#">113265650</a> | 2.889994747 | 1.531067 | 0.000199 | 0.000926 |
| APBB1        | <a href="#">113245850</a> | 2.888588584 | 1.530365 | 0.000398 | 0.001717 |
| SDHC         | <a href="#">113246688</a> | 2.888194773 | 1.530168 | 0.00285  | 0.00957  |
| KIF21A       | <a href="#">113257734</a> | 2.887569514 | 1.529856 | 0.001807 | 0.006444 |
| VPS9D1       | <a href="#">113252123</a> | 2.887557279 | 1.52985  | 0.000117 | 0.000579 |
| LOC113249791 | <a href="#">113249791</a> | 2.88730854  | 1.529725 | 0.004843 | 0.015169 |
| FST          | <a href="#">113263911</a> | 2.884834234 | 1.528488 | 0.008711 | 0.02488  |
| USP11        | <a href="#">113265969</a> | 2.883876225 | 1.528009 | 0.000546 | 0.002268 |
| OSBPL1A      | <a href="#">113253295</a> | 2.883243946 | 1.527693 | 0.001308 | 0.004874 |
| KDM4D        | <a href="#">113260162</a> | 2.88169687  | 1.526919 | 0.006911 | 0.020475 |
| PVR          | <a href="#">113243460</a> | 2.879585564 | 1.525861 | 0.001149 | 0.00435  |

|              |                           |             |          |          |          |
|--------------|---------------------------|-------------|----------|----------|----------|
| SLC47A2      | <a href="#">113271269</a> | 2.8791563   | 1.525646 | 0.008818 | 0.025143 |
| PSMG4        | <a href="#">113264402</a> | 2.877491927 | 1.524812 | 0.003848 | 0.012393 |
| PDCD5        | <a href="#">113244718</a> | 2.877340909 | 1.524736 | 0.000266 | 0.001198 |
| CLYBL        | <a href="#">113251501</a> | 2.877097215 | 1.524614 | 0.000728 | 0.002919 |
| THNSL2       | <a href="#">113242812</a> | 2.875942421 | 1.524035 | 0.00016  | 0.000763 |
| FRS3         | <a href="#">113261310</a> | 2.875317562 | 1.523721 | 0.000592 | 0.002436 |
| CPED1        | <a href="#">113263459</a> | 2.875250734 | 1.523688 | 0.001445 | 0.005315 |
| LOC113245523 | <a href="#">113245523</a> | 2.874889968 | 1.523507 | 0.000565 | 0.002337 |
| LOC113248542 | <a href="#">113248542</a> | 2.872694052 | 1.522404 | 0.001833 | 0.006522 |
| USH1C        | <a href="#">113246620</a> | 2.870756202 | 1.521431 | 0.008655 | 0.024745 |
| DUSP23       | <a href="#">113246655</a> | 2.869531271 | 1.520815 | 0.000873 | 0.003419 |
| ACP2         | <a href="#">113264970</a> | 2.869230846 | 1.520664 | 0.000158 | 0.000755 |
| KAT5         | <a href="#">113244098</a> | 2.868804899 | 1.52045  | 0.000119 | 0.000584 |
| ZFP92        | <a href="#">113247841</a> | 2.867292399 | 1.519689 | 0.008112 | 0.023467 |
| PYROXD2      | <a href="#">113251809</a> | 2.866435352 | 1.519258 | 0.005347 | 0.016519 |
| RTL10        | <a href="#">113245950</a> | 2.866365346 | 1.519223 | 0.001351 | 0.005013 |
| GATA6        | <a href="#">113253276</a> | 2.864077732 | 1.518071 | 0.012175 | 0.033026 |
| USP53        | <a href="#">113255610</a> | 2.862461563 | 1.517256 | 0.000126 | 0.000618 |
| MAB21L1      | <a href="#">113251254</a> | 2.8597858   | 1.515907 | 0.009872 | 0.027617 |
| DENND1B      | <a href="#">113242587</a> | 2.859505159 | 1.515766 | 0.001617 | 0.005857 |
| LRIG1        | <a href="#">113257056</a> | 2.858371338 | 1.515193 | 0.00987  | 0.027617 |
| DEAF1        | <a href="#">113248806</a> | 2.857667686 | 1.514838 | 8.56E-05 | 0.000436 |
| PRMT1        | <a href="#">113243287</a> | 2.856683873 | 1.514341 | 9.24E-05 | 0.000466 |
| RFK          | <a href="#">113269838</a> | 2.855092535 | 1.513538 | 0.000113 | 0.000559 |
| ATP5IF1      | <a href="#">113268421</a> | 2.852917366 | 1.512438 | 0.002292 | 0.007929 |
| ZNF662       | <a href="#">113253831</a> | 2.849905462 | 1.510914 | 0.001017 | 0.00391  |
| IARS2        | <a href="#">113268724</a> | 2.849463381 | 1.51069  | 0.000836 | 0.0033   |
| SERTAD4      | <a href="#">113262655</a> | 2.848330683 | 1.510117 | 0.019824 | 0.049863 |

|              |                           |             |          |          |          |
|--------------|---------------------------|-------------|----------|----------|----------|
| SMYD2        | <a href="#">113262691</a> | 2.848065215 | 1.509982 | 8.94E-05 | 0.000453 |
| LOC113248302 | <a href="#">113248302</a> | 2.845539536 | 1.508702 | 0.000848 | 0.00334  |
| STUB1        | <a href="#">113245397</a> | 2.844908975 | 1.508382 | 0.000667 | 0.002704 |
| PACS2        | <a href="#">113267179</a> | 2.839461873 | 1.505618 | 0.000345 | 0.001511 |
| UBXN1        | <a href="#">113246911</a> | 2.838427217 | 1.505092 | 0.000201 | 0.000936 |
| THAP12       | <a href="#">113269339</a> | 2.838329417 | 1.505042 | 0.000511 | 0.002142 |
| RAB40B       | <a href="#">113244465</a> | 2.83753057  | 1.504636 | 0.005138 | 0.015963 |
| ABLIM3       | <a href="#">113263929</a> | 2.833253489 | 1.50246  | 0.008185 | 0.023616 |
| EIF4E3       | <a href="#">113257082</a> | 2.831513015 | 1.501573 | 0.000257 | 0.001164 |
| PALM         | <a href="#">113242702</a> | 2.831354661 | 1.501492 | 0.004201 | 0.013364 |
| HMGCLL1      | <a href="#">113261167</a> | 2.830764188 | 1.501192 | 0.009027 | 0.025627 |
| CXCL14       | <a href="#">113261492</a> | 2.826119282 | 1.498822 | 0.0006   | 0.002464 |
| FOXO4        | <a href="#">113245656</a> | 2.825672457 | 1.498594 | 9.44E-05 | 0.000476 |
| NUDT6        | <a href="#">113255639</a> | 2.823321547 | 1.497393 | 0.000174 | 0.000823 |
| SLC43A1      | <a href="#">113246534</a> | 2.819761773 | 1.495573 | 7.82E-05 | 0.000401 |
| SAR1B        | <a href="#">113261745</a> | 2.817270929 | 1.494298 | 0.001116 | 0.004234 |
| TIMM13       | <a href="#">113242767</a> | 2.816740185 | 1.494026 | 0.000191 | 0.000894 |
| COQ3         | <a href="#">113264805</a> | 2.816310879 | 1.493807 | 0.000366 | 0.001594 |
| CFAP58       | <a href="#">113251623</a> | 2.813905165 | 1.492574 | 0.003322 | 0.010932 |
| NOD1         | <a href="#">113262332</a> | 2.81337358  | 1.492301 | 5.25E-05 | 0.000281 |
| POLR1E       | <a href="#">113260444</a> | 2.81193223  | 1.491562 | 6.06E-05 | 0.00032  |
| LOC113246836 | <a href="#">113246836</a> | 2.811013111 | 1.49109  | 0.007408 | 0.021724 |
| ITGB8        | <a href="#">113261164</a> | 2.810524774 | 1.49084  | 0.007735 | 0.022547 |
| FBXL17       | <a href="#">113255014</a> | 2.806189301 | 1.488612 | 4.15E-05 | 0.000225 |
| NKIRAS1      | <a href="#">113253873</a> | 2.804711617 | 1.487852 | 0.001512 | 0.005535 |
| OPN1SW       | <a href="#">113263870</a> | 2.804583554 | 1.487787 | 0.008516 | 0.024405 |
| FKRP         | <a href="#">113243391</a> | 2.802230364 | 1.486576 | 6.49E-05 | 0.000339 |
| LURAP1       | <a href="#">113254728</a> | 2.801988129 | 1.486451 | 0.005938 | 0.018069 |

|             |                           |             |          |          |          |
|-------------|---------------------------|-------------|----------|----------|----------|
| RPS28       | <a href="#">113242905</a> | 2.801091137 | 1.485989 | 0.008745 | 0.024959 |
| DCXR        | <a href="#">113244486</a> | 2.800603058 | 1.485738 | 0.000935 | 0.003633 |
| GCSH        | <a href="#">113252527</a> | 2.800183062 | 1.485521 | 0.003667 | 0.011892 |
| LRPPRC      | <a href="#">113246283</a> | 2.800156925 | 1.485508 | 0.003626 | 0.011793 |
| FIBIN       | <a href="#">113265095</a> | 2.79973605  | 1.485291 | 0.0028   | 0.009438 |
| CCSER2      | <a href="#">113259236</a> | 2.799554721 | 1.485197 | 0.000737 | 0.002953 |
| PSEN2       | <a href="#">113262931</a> | 2.795198781 | 1.482951 | 5.56E-05 | 0.000295 |
| NFIB        | <a href="#">113260613</a> | 2.795157034 | 1.482929 | 0.003377 | 0.011077 |
| EIF2A       | <a href="#">113254058</a> | 2.794226593 | 1.482449 | 0.000892 | 0.003486 |
| HTR1B       | <a href="#">113261102</a> | 2.793797258 | 1.482227 | 0.018017 | 0.046033 |
| SHANK3      | <a href="#">113241594</a> | 2.79354764  | 1.482098 | 0.000203 | 0.000941 |
| SLC39A2     | <a href="#">113248487</a> | 2.790749426 | 1.480653 | 0.006009 | 0.018262 |
| MARS2       | <a href="#">113250623</a> | 2.789786053 | 1.480154 | 0.000561 | 0.002323 |
| STARD7      | <a href="#">113241969</a> | 2.789785696 | 1.480154 | 0.002021 | 0.007094 |
| LSM14B      | <a href="#">113258785</a> | 2.789705375 | 1.480113 | 2.93E-05 | 0.000165 |
| TIMM8B      | <a href="#">113260055</a> | 2.788768646 | 1.479628 | 0.000281 | 0.001259 |
| PGP         | <a href="#">113245113</a> | 2.787390235 | 1.478915 | 0.000244 | 0.001112 |
| SYNGR2      | <a href="#">113244572</a> | 2.786576912 | 1.478494 | 0.000808 | 0.003198 |
| SOX8        | <a href="#">113245394</a> | 2.786111226 | 1.478253 | 0.005526 | 0.016982 |
| RDH5        | <a href="#">113256460</a> | 2.786091712 | 1.478243 | 0.006679 | 0.019937 |
| ZCCHC24     | <a href="#">113259220</a> | 2.785344893 | 1.477856 | 0.000496 | 0.002083 |
| MTUS1       | <a href="#">113262156</a> | 2.785128402 | 1.477744 | 0.007893 | 0.022948 |
| MRPL34      | <a href="#">113256673</a> | 2.776683984 | 1.473363 | 0.000734 | 0.002944 |
| PSMC3       | <a href="#">113264959</a> | 2.776673875 | 1.473358 | 0.000691 | 0.002791 |
| CUNH11orf94 | <a href="#">113264998</a> | 2.775642318 | 1.472822 | 0.012065 | 0.032766 |
| PPP1R14B    | <a href="#">113244179</a> | 2.77503988  | 1.472509 | 0.000957 | 0.003706 |
| MRPL11      | <a href="#">113244065</a> | 2.774259528 | 1.472103 | 0.000456 | 0.001929 |
| ZNHIT2      | <a href="#">113244132</a> | 2.773840008 | 1.471885 | 0.000182 | 0.000858 |

|              |                           |             |          |          |          |
|--------------|---------------------------|-------------|----------|----------|----------|
| ABCC2        | <a href="#">113251819</a> | 2.773251518 | 1.471578 | 0.005678 | 0.017384 |
| ARHGEF15     | <a href="#">113271183</a> | 2.772692735 | 1.471288 | 0.000658 | 0.002674 |
| AKT1S1       | <a href="#">113243278</a> | 2.770359677 | 1.470073 | 0.00129  | 0.004812 |
| LOC113257828 | <a href="#">113257828</a> | 2.769482881 | 1.469617 | 0.000444 | 0.001884 |
| SNRPN        | <a href="#">113263595</a> | 2.767657817 | 1.468666 | 0.002025 | 0.007106 |
| KLF2         | <a href="#">113256645</a> | 2.766123411 | 1.467866 | 0.000154 | 0.000738 |
| ACVR2A       | <a href="#">113250906</a> | 2.765061207 | 1.467311 | 0.001976 | 0.006956 |
| LOC113249995 | <a href="#">113249995</a> | 2.764735173 | 1.467141 | 0.004745 | 0.014883 |
| ANKRD53      | <a href="#">113244188</a> | 2.763558236 | 1.466527 | 0.00486  | 0.015196 |
| NTAN1        | <a href="#">113270768</a> | 2.76154135  | 1.465474 | 0.000363 | 0.001578 |
| TMEM94       | <a href="#">113244634</a> | 2.760900033 | 1.465139 | 5.41E-05 | 0.000287 |
| GATC         | <a href="#">113267042</a> | 2.760692971 | 1.46503  | 0.000374 | 0.001624 |
| HSD17B8      | <a href="#">113243793</a> | 2.759606558 | 1.464463 | 0.000187 | 0.000876 |
| RRM2B        | <a href="#">113252861</a> | 2.753958932 | 1.461507 | 0.000329 | 0.001451 |
| ELOB         | <a href="#">113245416</a> | 2.753279535 | 1.461151 | 0.000686 | 0.002772 |
| APPL2        | <a href="#">113256053</a> | 2.750749363 | 1.459825 | 0.001015 | 0.003902 |
| SNRNP25      | <a href="#">113245172</a> | 2.749923821 | 1.459392 | 0.000121 | 0.000596 |
| ZNF365       | <a href="#">113259088</a> | 2.748556723 | 1.458674 | 0.0031   | 0.010285 |
| LOC113242771 | <a href="#">113242771</a> | 2.747428928 | 1.458082 | 0.004071 | 0.013003 |
| ETV7         | <a href="#">113243859</a> | 2.746515693 | 1.457603 | 0.018037 | 0.046076 |
| RASD1        | <a href="#">113271303</a> | 2.746160388 | 1.457416 | 0.001874 | 0.006645 |
| ISPD         | <a href="#">113260950</a> | 2.746087227 | 1.457377 | 0.004381 | 0.013849 |
| LOC113247766 | <a href="#">113247766</a> | 2.744715613 | 1.456657 | 0.004263 | 0.013538 |
| NKAPL        | <a href="#">113248162</a> | 2.744366229 | 1.456473 | 0.013088 | 0.035144 |
| MRPS16       | <a href="#">113259173</a> | 2.743139757 | 1.455828 | 0.000123 | 0.000601 |
| GPRASP1      | <a href="#">113244313</a> | 2.742820733 | 1.45566  | 0.014852 | 0.039145 |
| ZNF25        | <a href="#">113258958</a> | 2.741605915 | 1.455021 | 0.00039  | 0.001686 |
| LOC113252203 | <a href="#">113252203</a> | 2.740667593 | 1.454527 | 0.000285 | 0.001276 |

|              |                           |             |          |          |          |
|--------------|---------------------------|-------------|----------|----------|----------|
| CD99L2       | <a href="#">113246822</a> | 2.73968058  | 1.454008 | 0.002996 | 0.010008 |
| CX3CL1       | <a href="#">113252283</a> | 2.739317228 | 1.453816 | 0.007124 | 0.021028 |
| TRIM3        | <a href="#">113245858</a> | 2.737538772 | 1.452879 | 0.002452 | 0.008404 |
| LOC113245502 | <a href="#">113245502</a> | 2.737483985 | 1.452851 | 0.000184 | 0.000865 |
| SEMA6A       | <a href="#">113261619</a> | 2.734838206 | 1.451455 | 0.000199 | 0.000926 |
| METAP1       | <a href="#">113263122</a> | 2.733324154 | 1.450657 | 0.000323 | 0.001427 |
| HABP4        | <a href="#">113269773</a> | 2.728440448 | 1.448077 | 0.000495 | 0.002083 |
| SMTN         | <a href="#">113245049</a> | 2.7277959   | 1.447736 | 0.000224 | 0.001031 |
| S100A13      | <a href="#">113245338</a> | 2.724239579 | 1.445854 | 0.000407 | 0.001748 |
| VMO1         | <a href="#">113271087</a> | 2.723303807 | 1.445358 | 0.017753 | 0.045462 |
| NAT14        | <a href="#">113247427</a> | 2.722950948 | 1.445171 | 0.008305 | 0.023896 |
| MARCH9       | <a href="#">113256359</a> | 2.720545463 | 1.443896 | 0.000845 | 0.003327 |
| DRG2         | <a href="#">113271293</a> | 2.719660812 | 1.443427 | 0.000101 | 0.000504 |
| LOC113250465 | <a href="#">113250465</a> | 2.716306518 | 1.441646 | 0.000369 | 0.001602 |
| PDLIM1       | <a href="#">113251752</a> | 2.714350661 | 1.440607 | 0.001248 | 0.004676 |
| ENPP5        | <a href="#">113261237</a> | 2.713108734 | 1.439947 | 0.000356 | 0.001553 |
| HUS1         | <a href="#">113257638</a> | 2.710556982 | 1.438589 | 0.000861 | 0.003385 |
| MLH3         | <a href="#">113270322</a> | 2.710137689 | 1.438366 | 0.000737 | 0.002952 |
| SH3BP4       | <a href="#">113250314</a> | 2.707829001 | 1.437137 | 0.002206 | 0.007671 |
| BANF1        | <a href="#">113244083</a> | 2.704376322 | 1.435296 | 0.000347 | 0.001516 |
| POLR2M       | <a href="#">113269673</a> | 2.704156344 | 1.435179 | 0.000427 | 0.001819 |
| LOC113244925 | <a href="#">113244925</a> | 2.70369669  | 1.434933 | 0.000168 | 0.000797 |
| PCYT1A       | <a href="#">113252916</a> | 2.701390734 | 1.433702 | 0.000203 | 0.000942 |
| LOC113246337 | <a href="#">113246337</a> | 2.700568588 | 1.433263 | 0.001753 | 0.006275 |
| NINJ2        | <a href="#">113258034</a> | 2.700170122 | 1.43305  | 0.010105 | 0.028151 |
| CIAO2B       | <a href="#">113252339</a> | 2.700167581 | 1.433049 | 0.000227 | 0.001042 |
| MOB2         | <a href="#">113243948</a> | 2.696608749 | 1.431146 | 0.000262 | 0.001182 |
| SELENOK      | <a href="#">113256985</a> | 2.696058847 | 1.430852 | 0.000332 | 0.001459 |

|              |                           |             |          |          |          |
|--------------|---------------------------|-------------|----------|----------|----------|
| CD59         | <a href="#">113265058</a> | 2.6940546   | 1.429779 | 0.007293 | 0.021452 |
| FER1L6       | <a href="#">113252749</a> | 2.691273961 | 1.428289 | 0.008612 | 0.024644 |
| ETFBKMT      | <a href="#">113257750</a> | 2.690743813 | 1.428005 | 0.002052 | 0.007193 |
| SYP          | <a href="#">113265951</a> | 2.690571135 | 1.427912 | 0.006351 | 0.019124 |
| ADGRF5       | <a href="#">113261229</a> | 2.690265488 | 1.427749 | 0.009159 | 0.025949 |
| POMGNT2      | <a href="#">113253834</a> | 2.688880252 | 1.427006 | 0.013858 | 0.036857 |
| ZADH2        | <a href="#">113253530</a> | 2.688598982 | 1.426855 | 0.000411 | 0.00176  |
| MRPS18C      | <a href="#">113263198</a> | 2.688381423 | 1.426738 | 0.000259 | 0.001171 |
| OXSM         | <a href="#">113253864</a> | 2.687339432 | 1.426179 | 0.000595 | 0.002449 |
| SLC25A25     | <a href="#">113266451</a> | 2.684895286 | 1.424866 | 0.001313 | 0.004892 |
| DLAT         | <a href="#">113260048</a> | 2.684746162 | 1.424786 | 0.00604  | 0.018341 |
| IKZF4        | <a href="#">113256443</a> | 2.684239857 | 1.424514 | 0.000736 | 0.002952 |
| LOC113261535 | <a href="#">113261535</a> | 2.683102833 | 1.423902 | 0.00159  | 0.005779 |
| GJA5         | <a href="#">113247790</a> | 2.681869164 | 1.423239 | 0.001486 | 0.00545  |
| ARHGEF25     | <a href="#">113256370</a> | 2.681421871 | 1.422998 | 0.0071   | 0.020977 |
| WDR77        | <a href="#">113244430</a> | 2.680997402 | 1.42277  | 0.000306 | 0.001363 |
| GADD45G      | <a href="#">113270128</a> | 2.679192922 | 1.421798 | 0.00133  | 0.004939 |
| EEF2K        | <a href="#">113267554</a> | 2.678286548 | 1.42131  | 0.000217 | 0.001002 |
| ETS2         | <a href="#">113258013</a> | 2.6782852   | 1.42131  | 0.000166 | 0.000791 |
| MTHFR        | <a href="#">113270501</a> | 2.675957982 | 1.420055 | 0.000304 | 0.001353 |
| LOC113251149 | <a href="#">113251149</a> | 2.675435402 | 1.419774 | 0.01477  | 0.038954 |
| DCAF8        | <a href="#">113246657</a> | 2.674621904 | 1.419335 | 0.002685 | 0.009097 |
| HSD17B1      | <a href="#">113265419</a> | 2.672667376 | 1.41828  | 0.006869 | 0.020374 |
| ECHS1        | <a href="#">113252096</a> | 2.672265184 | 1.418063 | 0.005707 | 0.017459 |
| TIMMDC1      | <a href="#">113251876</a> | 2.670442157 | 1.417079 | 0.000789 | 0.003131 |
| ARAF         | <a href="#">113265980</a> | 2.669560783 | 1.416602 | 0.000345 | 0.00151  |
| ZAN          | <a href="#">113267522</a> | 2.668748636 | 1.416163 | 0.007909 | 0.022982 |
| ZNF846       | <a href="#">113242959</a> | 2.668407801 | 1.415979 | 0.012227 | 0.033127 |

|              |                           |             |          |          |          |
|--------------|---------------------------|-------------|----------|----------|----------|
| CUNH2orf92   | <a href="#">113246726</a> | 2.668304856 | 1.415924 | 0.008497 | 0.024358 |
| ANKRD33      | <a href="#">113257597</a> | 2.667899432 | 1.415704 | 0.010456 | 0.028983 |
| ZNF485       | <a href="#">113243138</a> | 2.667578834 | 1.415531 | 0.00499  | 0.015564 |
| DBP          | <a href="#">113243343</a> | 2.666944995 | 1.415188 | 0.003776 | 0.012205 |
| CUNH19orf54  | <a href="#">113243556</a> | 2.666436593 | 1.414913 | 0.002747 | 0.009279 |
| TOM1L2       | <a href="#">113271297</a> | 2.666237522 | 1.414805 | 0.00025  | 0.001137 |
| LOC113245461 | <a href="#">113245461</a> | 2.664981594 | 1.414126 | 0.002314 | 0.007989 |
| TPPP         | <a href="#">113260777</a> | 2.663682692 | 1.413422 | 0.004333 | 0.013718 |
| CAPZA2       | <a href="#">113263223</a> | 2.663376944 | 1.413257 | 0.001727 | 0.006193 |
| AVPR2        | <a href="#">113247864</a> | 2.662167697 | 1.412601 | 0.017666 | 0.045297 |
| DYNLL2       | <a href="#">113268866</a> | 2.659436383 | 1.411121 | 0.000945 | 0.003666 |
| STRN3        | <a href="#">113266095</a> | 2.658935892 | 1.410849 | 0.000176 | 0.000833 |
| EXOSC9       | <a href="#">113255628</a> | 2.658911862 | 1.410836 | 0.000205 | 0.000953 |
| LGR4         | <a href="#">113265090</a> | 2.658684374 | 1.410713 | 0.000457 | 0.00193  |
| UBE2E3       | <a href="#">113250703</a> | 2.658364414 | 1.410539 | 0.000183 | 0.000864 |
| CASKIN2      | <a href="#">113244635</a> | 2.657993432 | 1.410338 | 0.000341 | 0.001495 |
| HOXA9        | <a href="#">113262053</a> | 2.657003399 | 1.4098   | 0.000771 | 0.003071 |
| CILP         | <a href="#">113240867</a> | 2.655169709 | 1.408804 | 0.014119 | 0.037475 |
| MET          | <a href="#">113263211</a> | 2.649262943 | 1.405591 | 0.005247 | 0.016251 |
| DNAJA3       | <a href="#">113270848</a> | 2.648236619 | 1.405032 | 0.000409 | 0.001754 |
| CCDC121      | <a href="#">113271301</a> | 2.646730635 | 1.404211 | 0.001098 | 0.004174 |
| LOC113248539 | <a href="#">113248539</a> | 2.646360422 | 1.40401  | 0.000385 | 0.001666 |
| ITGA7        | <a href="#">113256462</a> | 2.645579995 | 1.403584 | 0.016156 | 0.042037 |
| RUFY3        | <a href="#">113263301</a> | 2.645358128 | 1.403463 | 0.000282 | 0.001266 |
| KIAA1107     | <a href="#">113254412</a> | 2.643513275 | 1.402457 | 0.000533 | 0.002217 |
| ZNF134       | <a href="#">113247987</a> | 2.640180258 | 1.400636 | 0.000225 | 0.001034 |
| ACYP1        | <a href="#">113270321</a> | 2.640123852 | 1.400606 | 0.001947 | 0.006864 |
| ARHGEF7      | <a href="#">113248529</a> | 2.635871142 | 1.39828  | 0.000365 | 0.001587 |

|              |                           |             |          |          |          |
|--------------|---------------------------|-------------|----------|----------|----------|
| PGAM5        | <a href="#">113266837</a> | 2.634784311 | 1.397685 | 0.000139 | 0.000673 |
| FAM135A      | <a href="#">113261136</a> | 2.632566089 | 1.39647  | 0.000527 | 0.002196 |
| CDH15        | <a href="#">113252138</a> | 2.629044551 | 1.394539 | 0.01354  | 0.036128 |
| LOC113253631 | <a href="#">113253631</a> | 2.628706105 | 1.394353 | 0.009331 | 0.026357 |
| POLM         | <a href="#">113257880</a> | 2.627902792 | 1.393912 | 0.009514 | 0.026792 |
| EPHX4        | <a href="#">113254413</a> | 2.626481904 | 1.393132 | 0.017802 | 0.04556  |
| LOC113262545 | <a href="#">113262545</a> | 2.626332169 | 1.393049 | 0.000514 | 0.002149 |
| ATP6V1FNB    | <a href="#">113263980</a> | 2.625485498 | 1.392584 | 0.011994 | 0.032626 |
| POLR3C       | <a href="#">113247755</a> | 2.62503039  | 1.392334 | 0.000749 | 0.002994 |
| SDHAF1       | <a href="#">113244838</a> | 2.624640219 | 1.39212  | 0.002306 | 0.007965 |
| SLX4         | <a href="#">113270863</a> | 2.622966178 | 1.391199 | 0.000533 | 0.002217 |
| RABEP1       | <a href="#">113271062</a> | 2.621750844 | 1.390531 | 0.000227 | 0.001042 |
| TESK1        | <a href="#">113260478</a> | 2.620448478 | 1.389814 | 0.000426 | 0.001818 |
| ISLR2        | <a href="#">113240958</a> | 2.618798424 | 1.388905 | 0.007874 | 0.022909 |
| ECSCR        | <a href="#">113261806</a> | 2.618048231 | 1.388492 | 0.002695 | 0.009128 |
| CUNH16orf89  | <a href="#">113270825</a> | 2.617842651 | 1.388378 | 0.019062 | 0.048323 |
| ARHGEF28     | <a href="#">113255216</a> | 2.615795411 | 1.38725  | 0.007231 | 0.021293 |
| ST8SIA5      | <a href="#">113253380</a> | 2.615175501 | 1.386908 | 0.002025 | 0.007106 |
| EMC9         | <a href="#">113246088</a> | 2.614557513 | 1.386567 | 0.00092  | 0.003577 |
| SETD3        | <a href="#">113267284</a> | 2.611390372 | 1.384818 | 0.000328 | 0.001449 |
| DIPK2B       | <a href="#">113265908</a> | 2.611369114 | 1.384806 | 0.003603 | 0.011731 |
| UACA         | <a href="#">113240926</a> | 2.61014728  | 1.384131 | 0.000617 | 0.002527 |
| NELL2        | <a href="#">113257712</a> | 2.609464431 | 1.383754 | 0.01239  | 0.033516 |
| LNX1         | <a href="#">113262494</a> | 2.608234369 | 1.383074 | 0.000426 | 0.001818 |
| NDUFAF1      | <a href="#">113242009</a> | 2.607483368 | 1.382658 | 0.001123 | 0.00426  |
| ZC2HC1A      | <a href="#">113253024</a> | 2.607145311 | 1.382471 | 0.007711 | 0.022488 |
| BCKDK        | <a href="#">113267717</a> | 2.60631585  | 1.382012 | 0.0009   | 0.003513 |
| ALS2         | <a href="#">113250585</a> | 2.602743323 | 1.380033 | 0.000497 | 0.002087 |

|              |                           |             |          |          |          |
|--------------|---------------------------|-------------|----------|----------|----------|
| RHOD         | <a href="#">113244042</a> | 2.599590842 | 1.378285 | 0.009806 | 0.027476 |
| MRPL36       | <a href="#">113260792</a> | 2.599500271 | 1.378234 | 0.001909 | 0.006751 |
| LOC113270508 | <a href="#">113270508</a> | 2.599294154 | 1.37812  | 0.013765 | 0.036622 |
| GPT          | <a href="#">113247624</a> | 2.598829924 | 1.377862 | 0.006454 | 0.019389 |
| FRY          | <a href="#">113251237</a> | 2.598054688 | 1.377432 | 0.000553 | 0.002292 |
| VTN          | <a href="#">113269030</a> | 2.597344376 | 1.377037 | 0.002075 | 0.00726  |
| DIXDC1       | <a href="#">113260059</a> | 2.597285198 | 1.377004 | 0.0019   | 0.006725 |
| ZNF142       | <a href="#">113250451</a> | 2.596902833 | 1.376792 | 0.001026 | 0.00394  |
| PDE4A        | <a href="#">113242988</a> | 2.596365837 | 1.376494 | 0.00323  | 0.010657 |
| MESP1        | <a href="#">113263697</a> | 2.594481606 | 1.375446 | 0.010024 | 0.027955 |
| LOC113254720 | <a href="#">113254720</a> | 2.594398478 | 1.3754   | 0.005026 | 0.015657 |
| AGPAT5       | <a href="#">113262188</a> | 2.592372217 | 1.374273 | 0.000608 | 0.002494 |
| MRPS35       | <a href="#">113257772</a> | 2.591817118 | 1.373964 | 0.001619 | 0.00586  |
| MB21D2       | <a href="#">113253491</a> | 2.588293952 | 1.372001 | 0.015779 | 0.04127  |
| MSRB2        | <a href="#">113241336</a> | 2.587988228 | 1.371831 | 0.005347 | 0.016519 |
| ALDH1A3      | <a href="#">113263632</a> | 2.585569228 | 1.370482 | 0.001044 | 0.003995 |
| AP4S1        | <a href="#">113266097</a> | 2.584333853 | 1.369792 | 0.002109 | 0.00737  |
| ABI2         | <a href="#">113250562</a> | 2.580843651 | 1.367843 | 0.000855 | 0.003365 |
| PLCE1        | <a href="#">113243183</a> | 2.580535756 | 1.367671 | 0.001177 | 0.004438 |
| CCDC85B      | <a href="#">113244087</a> | 2.580446554 | 1.367621 | 0.000491 | 0.002066 |
| HYPK         | <a href="#">113241956</a> | 2.577598414 | 1.366028 | 0.000408 | 0.001753 |
| BRMS1L       | <a href="#">113266134</a> | 2.577378006 | 1.365904 | 0.000739 | 0.002959 |
| CUL3         | <a href="#">113250393</a> | 2.575699561 | 1.364964 | 0.001435 | 0.005281 |
| DLST         | <a href="#">113270325</a> | 2.571926828 | 1.36285  | 0.005233 | 0.016214 |
| INKA2        | <a href="#">113244426</a> | 2.568761128 | 1.361073 | 0.011983 | 0.03261  |
| B3GALT4      | <a href="#">113243802</a> | 2.568661206 | 1.361017 | 0.008077 | 0.023384 |
| TJP1         | <a href="#">113263619</a> | 2.568406447 | 1.360874 | 0.001427 | 0.005259 |
| LY6G5B       | <a href="#">113243725</a> | 2.567988267 | 1.360639 | 0.001065 | 0.004066 |

|              |                           |             |          |          |          |
|--------------|---------------------------|-------------|----------|----------|----------|
| ZNF484       | <a href="#">113270082</a> | 2.566855256 | 1.360002 | 0.008425 | 0.02419  |
| LOC113249794 | <a href="#">113249794</a> | 2.566120931 | 1.359589 | 0.008919 | 0.02537  |
| SLCO3A1      | <a href="#">113263665</a> | 2.564288938 | 1.358559 | 0.00038  | 0.001646 |
| SMARCA1      | <a href="#">113270938</a> | 2.560598376 | 1.356481 | 0.001567 | 0.005704 |
| KCMF1        | <a href="#">113243249</a> | 2.556285618 | 1.354049 | 0.0004   | 0.001725 |
| JCAD         | <a href="#">113244246</a> | 2.556223685 | 1.354014 | 0.00101  | 0.003885 |
| CFAP46       | <a href="#">113252084</a> | 2.555771158 | 1.353759 | 0.01239  | 0.033516 |
| SRF          | <a href="#">113261274</a> | 2.555692587 | 1.353714 | 0.000444 | 0.001883 |
| SMDT1        | <a href="#">113241709</a> | 2.554495876 | 1.353039 | 0.000389 | 0.00168  |
| TRAPPC6B     | <a href="#">113266154</a> | 2.553601676 | 1.352534 | 0.000318 | 0.001408 |
| PCSK4        | <a href="#">113242736</a> | 2.553594108 | 1.352529 | 0.001901 | 0.006726 |
| ZNF10        | <a href="#">113266827</a> | 2.552878771 | 1.352125 | 0.000379 | 0.001642 |
| ZSWIM5       | <a href="#">113254749</a> | 2.552834404 | 1.3521   | 0.016366 | 0.042503 |
| FAM110D      | <a href="#">113268468</a> | 2.551348442 | 1.35126  | 0.007649 | 0.022332 |
| JTB          | <a href="#">113245325</a> | 2.550925395 | 1.351021 | 0.002988 | 0.00999  |
| LOC113241121 | <a href="#">113241121</a> | 2.547009178 | 1.348804 | 0.000894 | 0.003492 |
| MCC          | <a href="#">113254984</a> | 2.546974728 | 1.348785 | 0.001314 | 0.004894 |
| LOC113248518 | <a href="#">113248518</a> | 2.545460399 | 1.347927 | 0.000529 | 0.002202 |
| S100A16      | <a href="#">113245341</a> | 2.545048521 | 1.347693 | 0.001127 | 0.004275 |
| GMPR         | <a href="#">113264491</a> | 2.544958181 | 1.347642 | 0.012094 | 0.032825 |
| IFT81        | <a href="#">113266949</a> | 2.543255085 | 1.346676 | 0.002717 | 0.009185 |
| ETNK2        | <a href="#">113242508</a> | 2.542797722 | 1.346417 | 0.013329 | 0.035665 |
| ARL6IP5      | <a href="#">113257071</a> | 2.542110543 | 1.346027 | 0.005813 | 0.017745 |
| EPHX2        | <a href="#">113269956</a> | 2.541894927 | 1.345904 | 0.006296 | 0.01899  |
| GFM1         | <a href="#">113254120</a> | 2.541724351 | 1.345808 | 0.0011   | 0.004182 |
| UHRF1BP1     | <a href="#">113243830</a> | 2.540707032 | 1.34523  | 0.000383 | 0.001658 |
| NDUFA10      | <a href="#">113249793</a> | 2.540112824 | 1.344893 | 0.001669 | 0.006019 |
| NTMT1        | <a href="#">113266511</a> | 2.538504436 | 1.343979 | 0.000901 | 0.003514 |

|              |                           |             |          |          |          |
|--------------|---------------------------|-------------|----------|----------|----------|
| ANKRD40      | <a href="#">113265631</a> | 2.536947305 | 1.343094 | 0.000913 | 0.003556 |
| LOC113248398 | <a href="#">113248398</a> | 2.536369415 | 1.342765 | 0.000682 | 0.002763 |
| ZFP62        | <a href="#">113261523</a> | 2.535671283 | 1.342368 | 0.000523 | 0.002186 |
| RNF31        | <a href="#">113245982</a> | 2.533927965 | 1.341376 | 0.000913 | 0.003556 |
| FDX1         | <a href="#">113260080</a> | 2.531426975 | 1.339951 | 0.002928 | 0.00981  |
| DGKE         | <a href="#">113268844</a> | 2.531243739 | 1.339846 | 0.000172 | 0.000814 |
| MRPL47       | <a href="#">113254740</a> | 2.529614082 | 1.338917 | 0.001161 | 0.004386 |
| FNIP1        | <a href="#">113261697</a> | 2.529316779 | 1.338748 | 0.000784 | 0.003116 |
| DPP8         | <a href="#">113240872</a> | 2.529013186 | 1.338575 | 0.000726 | 0.002915 |
| SOCS1        | <a href="#">113270798</a> | 2.52891443  | 1.338518 | 0.008912 | 0.025359 |
| SAT2         | <a href="#">113271158</a> | 2.52666257  | 1.337233 | 0.01278  | 0.034448 |
| NMD3         | <a href="#">113254147</a> | 2.525918022 | 1.336808 | 0.000952 | 0.003692 |
| CHDH         | <a href="#">113256982</a> | 2.525428158 | 1.336528 | 0.000577 | 0.002383 |
| OLA1         | <a href="#">113250762</a> | 2.524761185 | 1.336147 | 0.001059 | 0.004045 |
| FGD5         | <a href="#">113257212</a> | 2.52301624  | 1.335149 | 0.000458 | 0.001936 |
| SLC10A6      | <a href="#">113263176</a> | 2.521967215 | 1.33455  | 0.017654 | 0.045275 |
| ELOC         | <a href="#">113253044</a> | 2.521738037 | 1.334418 | 0.000389 | 0.001681 |
| CBY3         | <a href="#">113261946</a> | 2.52129906  | 1.334167 | 0.009363 | 0.026422 |
| SLC25A26     | <a href="#">113257057</a> | 2.520937543 | 1.33396  | 0.002014 | 0.007079 |
| FXN          | <a href="#">113270198</a> | 2.519386232 | 1.333072 | 0.000772 | 0.003074 |
| IDS          | <a href="#">113241894</a> | 2.518136924 | 1.332357 | 0.002478 | 0.008478 |
| NOP10        | <a href="#">113242084</a> | 2.517681806 | 1.332096 | 0.001067 | 0.004071 |
| LRRC42       | <a href="#">113254642</a> | 2.516731398 | 1.331551 | 0.001115 | 0.004231 |
| KLF4         | <a href="#">113260343</a> | 2.516066125 | 1.33117  | 0.000632 | 0.002581 |
| APOA1        | <a href="#">113260022</a> | 2.515538139 | 1.330867 | 0.005535 | 0.017003 |
| UCHL5        | <a href="#">113268752</a> | 2.51520086  | 1.330674 | 0.000368 | 0.0016   |
| GLO1         | <a href="#">113243888</a> | 2.514142037 | 1.330066 | 0.008134 | 0.023516 |
| TMTC2        | <a href="#">113256210</a> | 2.51253682  | 1.329145 | 0.006567 | 0.019665 |

|              |                           |             |          |          |          |
|--------------|---------------------------|-------------|----------|----------|----------|
| EIF3K        | <a href="#">113243612</a> | 2.51180052  | 1.328722 | 0.00604  | 0.018341 |
| RPP21        | <a href="#">113264371</a> | 2.51027319  | 1.327844 | 0.007681 | 0.02241  |
| TRMT13       | <a href="#">113254356</a> | 2.510180153 | 1.327791 | 0.00035  | 0.001528 |
| CEP68        | <a href="#">113244834</a> | 2.510158687 | 1.327779 | 0.000418 | 0.001787 |
| PAIP2        | <a href="#">113261802</a> | 2.509717567 | 1.327525 | 0.003978 | 0.012746 |
| BAIAP2       | <a href="#">113244528</a> | 2.508585827 | 1.326874 | 0.001779 | 0.006352 |
| LOC113249956 | <a href="#">113249956</a> | 2.507610451 | 1.326313 | 0.01438  | 0.038056 |
| KLF9         | <a href="#">113270210</a> | 2.505981803 | 1.325376 | 0.002053 | 0.007195 |
| PIGX         | <a href="#">113242811</a> | 2.505036668 | 1.324832 | 0.004317 | 0.013677 |
| FAM43A       | <a href="#">113253342</a> | 2.50088316  | 1.322438 | 0.000832 | 0.003284 |
| SERTAD1      | <a href="#">113243566</a> | 2.499547669 | 1.321667 | 0.000872 | 0.003418 |
| MKKS         | <a href="#">113258338</a> | 2.499324954 | 1.321538 | 0.00081  | 0.003204 |
| OGFOD1       | <a href="#">113252259</a> | 2.497405862 | 1.32043  | 0.002884 | 0.009671 |
| LOC113248766 | <a href="#">113248766</a> | 2.493641841 | 1.318254 | 0.001196 | 0.004504 |
| KATNAL2      | <a href="#">113253383</a> | 2.493209392 | 1.318004 | 0.016677 | 0.043137 |
| PMPCB        | <a href="#">113258960</a> | 2.493049726 | 1.317912 | 0.001944 | 0.006857 |
| TANGO2       | <a href="#">113245938</a> | 2.492634274 | 1.317671 | 0.00096  | 0.003716 |
| CIAO3        | <a href="#">113245391</a> | 2.492292998 | 1.317474 | 0.00043  | 0.001832 |
| SUMO3        | <a href="#">113251043</a> | 2.490690722 | 1.316546 | 0.000273 | 0.001226 |
| TOB2         | <a href="#">113241727</a> | 2.490378116 | 1.316365 | 0.000408 | 0.001753 |
| MOAP1        | <a href="#">113267336</a> | 2.489164897 | 1.315662 | 0.007621 | 0.022263 |
| PNPO         | <a href="#">113265563</a> | 2.488623575 | 1.315348 | 0.000961 | 0.003718 |
| DNAJB9       | <a href="#">113262843</a> | 2.488211176 | 1.315109 | 0.000646 | 0.002629 |
| PRPF40B      | <a href="#">113257645</a> | 2.487240886 | 1.314546 | 0.001298 | 0.00484  |
| OGDH         | <a href="#">113257822</a> | 2.484130236 | 1.312741 | 0.010344 | 0.028742 |
| LOC113248597 | <a href="#">113248597</a> | 2.481723117 | 1.311342 | 0.001677 | 0.006042 |
| AUTS2        | <a href="#">113267983</a> | 2.481319769 | 1.311108 | 0.001534 | 0.005603 |
| QKI          | <a href="#">113259634</a> | 2.481300497 | 1.311096 | 0.006313 | 0.019028 |

|              |                           |             |          |          |          |
|--------------|---------------------------|-------------|----------|----------|----------|
| SMIM27       | <a href="#">113260541</a> | 2.480514239 | 1.310639 | 0.001882 | 0.006669 |
| DNTTIP1      | <a href="#">113258656</a> | 2.478909768 | 1.309706 | 0.000476 | 0.002008 |
| FHOD1        | <a href="#">113252346</a> | 2.478776634 | 1.309628 | 0.001221 | 0.004586 |
| NELL1        | <a href="#">113265109</a> | 2.477810724 | 1.309066 | 0.015255 | 0.040052 |
| YY2          | <a href="#">113242235</a> | 2.476952383 | 1.308566 | 0.012592 | 0.033966 |
| ZNF862       | <a href="#">113241422</a> | 2.4763217   | 1.308199 | 0.00151  | 0.005528 |
| LRRC32       | <a href="#">113269342</a> | 2.476311241 | 1.308193 | 0.01299  | 0.034942 |
| ZNF835       | <a href="#">113248545</a> | 2.475315631 | 1.307612 | 0.011262 | 0.030869 |
| ENO2         | <a href="#">113257953</a> | 2.474773178 | 1.307296 | 0.008973 | 0.025501 |
| PDF          | <a href="#">113252427</a> | 2.471317643 | 1.30528  | 0.003142 | 0.010412 |
| LOC113250723 | <a href="#">113250723</a> | 2.47124946  | 1.305241 | 0.017233 | 0.044364 |
| MAF          | <a href="#">113251743</a> | 2.471107447 | 1.305158 | 0.000684 | 0.002766 |
| AVEN         | <a href="#">113242077</a> | 2.470527306 | 1.304819 | 0.003683 | 0.011935 |
| EPN1         | <a href="#">113247373</a> | 2.470119841 | 1.304581 | 0.003852 | 0.012395 |
| ATF4         | <a href="#">113241758</a> | 2.468423568 | 1.30359  | 0.015985 | 0.041689 |
| COP55        | <a href="#">113268036</a> | 2.466822059 | 1.302654 | 0.000839 | 0.003308 |
| ZBTB44       | <a href="#">113259859</a> | 2.46551767  | 1.301891 | 0.001473 | 0.005408 |
| BMPR1A       | <a href="#">113259247</a> | 2.464702442 | 1.301413 | 0.001196 | 0.004504 |
| ZNF496       | <a href="#">113247501</a> | 2.460577141 | 1.298997 | 0.000527 | 0.002196 |
| PDCL3        | <a href="#">113247123</a> | 2.459849146 | 1.29857  | 0.000821 | 0.003247 |
| EFNB2        | <a href="#">113251527</a> | 2.459752368 | 1.298513 | 0.000916 | 0.003566 |
| LOC113250195 | <a href="#">113250195</a> | 2.457652289 | 1.297281 | 0.00452  | 0.014237 |
| LOC113247187 | <a href="#">113247187</a> | 2.45743026  | 1.29715  | 0.018086 | 0.046176 |
| SNCAIP       | <a href="#">113261642</a> | 2.456513978 | 1.296612 | 0.002609 | 0.008856 |
| SNX16        | <a href="#">113252997</a> | 2.45482393  | 1.29562  | 0.005172 | 0.016053 |
| SHROOM4      | <a href="#">113265963</a> | 2.454373303 | 1.295355 | 0.001563 | 0.005694 |
| GPC1         | <a href="#">113249723</a> | 2.454200086 | 1.295253 | 0.00165  | 0.005964 |
| ATP5PF       | <a href="#">113270115</a> | 2.453070366 | 1.294589 | 0.001059 | 0.004045 |

|              |                           |             |          |          |          |
|--------------|---------------------------|-------------|----------|----------|----------|
| CEP85        | <a href="#">113268462</a> | 2.45181516  | 1.29385  | 0.005944 | 0.018078 |
| CRYZ         | <a href="#">113254523</a> | 2.450440643 | 1.293041 | 0.001674 | 0.006033 |
| LOC113248075 | <a href="#">113248075</a> | 2.4490086   | 1.292198 | 0.012466 | 0.033661 |
| EIF3F        | <a href="#">113245854</a> | 2.447861365 | 1.291522 | 0.015826 | 0.041376 |
| IRF2BPL      | <a href="#">113270301</a> | 2.447013914 | 1.291022 | 0.000537 | 0.002229 |
| FAM149B1     | <a href="#">113259170</a> | 2.445966732 | 1.290405 | 0.00088  | 0.003443 |
| MSRB3        | <a href="#">113256321</a> | 2.445354445 | 1.290044 | 0.002333 | 0.008049 |
| TBC1D17      | <a href="#">113243277</a> | 2.445185008 | 1.289944 | 0.002846 | 0.009562 |
| PALMD        | <a href="#">113254365</a> | 2.445069248 | 1.289875 | 0.016598 | 0.042947 |
| MAP2K6       | <a href="#">113265227</a> | 2.443599776 | 1.289008 | 0.010784 | 0.029715 |
| ST6GALNAC3   | <a href="#">113254511</a> | 2.443282881 | 1.288821 | 0.016717 | 0.043231 |
| LRP3         | <a href="#">113244753</a> | 2.440521737 | 1.28719  | 0.006468 | 0.019427 |
| BMT2         | <a href="#">113263037</a> | 2.439590129 | 1.286639 | 0.000517 | 0.002163 |
| NFATC2       | <a href="#">113258729</a> | 2.439177004 | 1.286394 | 0.001277 | 0.004773 |
| TIMM44       | <a href="#">113242912</a> | 2.437622709 | 1.285475 | 0.000866 | 0.0034   |
| NLRX1        | <a href="#">113259964</a> | 2.436060661 | 1.28455  | 0.001329 | 0.004938 |
| NEK7         | <a href="#">113242585</a> | 2.434999588 | 1.283922 | 0.000808 | 0.003198 |
| APLNR        | <a href="#">113246359</a> | 2.434618001 | 1.283695 | 0.004243 | 0.01348  |
| CD320        | <a href="#">113242906</a> | 2.433699176 | 1.283151 | 0.001564 | 0.005695 |
| TIMM8A       | <a href="#">113244302</a> | 2.429945525 | 1.280924 | 0.001242 | 0.004656 |
| QRSL1        | <a href="#">113264780</a> | 2.424935734 | 1.277947 | 0.00137  | 0.005074 |
| CCDC90B      | <a href="#">113269384</a> | 2.423559429 | 1.277127 | 0.001038 | 0.003977 |
| JMJD4        | <a href="#">113247512</a> | 2.423022169 | 1.276808 | 0.00121  | 0.004551 |
| FZD6         | <a href="#">113252851</a> | 2.421221246 | 1.275735 | 0.00593  | 0.018054 |
| MRPS22       | <a href="#">113253995</a> | 2.417433506 | 1.273476 | 0.001045 | 0.004    |
| RAPGEFL1     | <a href="#">113265495</a> | 2.413720836 | 1.271259 | 0.018534 | 0.047168 |
| METAP1D      | <a href="#">113250774</a> | 2.413229384 | 1.270965 | 0.011453 | 0.031324 |
| PODXL        | <a href="#">113265973</a> | 2.412975864 | 1.270813 | 0.00397  | 0.012725 |

|              |                           |             |          |          |          |
|--------------|---------------------------|-------------|----------|----------|----------|
| THRB         | <a href="#">113253868</a> | 2.412073824 | 1.270274 | 0.002828 | 0.009513 |
| HMOX2        | <a href="#">113270845</a> | 2.411322687 | 1.269825 | 0.002452 | 0.008404 |
| LOC113261831 | <a href="#">113261831</a> | 2.410521093 | 1.269345 | 0.011041 | 0.030349 |
| STARD8       | <a href="#">113245626</a> | 2.409269358 | 1.268596 | 0.0023   | 0.007948 |
| NOTCH4       | <a href="#">113243767</a> | 2.40674323  | 1.267082 | 0.005204 | 0.016143 |
| SHE          | <a href="#">113245167</a> | 2.406638151 | 1.267019 | 0.00084  | 0.003311 |
| GUF1         | <a href="#">113262451</a> | 2.406438384 | 1.266899 | 0.000724 | 0.00291  |
| DCBLD1       | <a href="#">113259386</a> | 2.405569044 | 1.266378 | 0.010594 | 0.0293   |
| RPP30        | <a href="#">113243155</a> | 2.404721226 | 1.26587  | 0.001601 | 0.005812 |
| MRPS7        | <a href="#">113244641</a> | 2.403612751 | 1.265204 | 0.001756 | 0.006281 |
| CUL1         | <a href="#">113241451</a> | 2.403456443 | 1.265111 | 0.001241 | 0.004655 |
| NRP1         | <a href="#">113244231</a> | 2.401055075 | 1.263668 | 0.005113 | 0.015896 |
| ETFB         | <a href="#">113247289</a> | 2.399819069 | 1.262926 | 0.001656 | 0.005978 |
| NAA50        | <a href="#">113251480</a> | 2.399540494 | 1.262758 | 0.009302 | 0.026288 |
| ANO1         | <a href="#">113243981</a> | 2.399057123 | 1.262468 | 0.013108 | 0.035163 |
| OSGEPL1      | <a href="#">113250668</a> | 2.398133642 | 1.261912 | 0.004678 | 0.014707 |
| EMC6         | <a href="#">113269159</a> | 2.396847459 | 1.261138 | 0.001521 | 0.005564 |
| IMMT         | <a href="#">113242973</a> | 2.395743371 | 1.260473 | 0.004939 | 0.015423 |
| PDAP1        | <a href="#">113267911</a> | 2.395168052 | 1.260127 | 0.00114  | 0.004319 |
| ATAD1        | <a href="#">113258977</a> | 2.393678412 | 1.259229 | 0.001008 | 0.003878 |
| EGFL8        | <a href="#">113243749</a> | 2.393016899 | 1.258831 | 0.017542 | 0.045022 |
| ABHD18       | <a href="#">113255655</a> | 2.391541111 | 1.257941 | 0.001727 | 0.006193 |
| MRPL48       | <a href="#">113269296</a> | 2.391316781 | 1.257805 | 0.001642 | 0.005941 |
| IL11RA       | <a href="#">113260499</a> | 2.391196667 | 1.257733 | 0.004121 | 0.013143 |
| LOC113252411 | <a href="#">113252411</a> | 2.391118215 | 1.257685 | 0.017159 | 0.044197 |
| JAM2         | <a href="#">113269860</a> | 2.390645817 | 1.2574   | 0.017163 | 0.044199 |
| GRK4         | <a href="#">113245697</a> | 2.386913556 | 1.255146 | 0.000964 | 0.003727 |
| CDH5         | <a href="#">113252324</a> | 2.385289443 | 1.254164 | 0.011704 | 0.031939 |

|              |                           |             |          |          |          |
|--------------|---------------------------|-------------|----------|----------|----------|
| RIPK2        | <a href="#">113252964</a> | 2.384724761 | 1.253823 | 0.002493 | 0.008523 |
| HSPA14       | <a href="#">113241392</a> | 2.383269835 | 1.252942 | 0.000996 | 0.003836 |
| P2RY2        | <a href="#">113269285</a> | 2.380601867 | 1.251326 | 0.01245  | 0.033638 |
| NSFL1C       | <a href="#">113258424</a> | 2.380394341 | 1.251201 | 0.000693 | 0.0028   |
| PET117       | <a href="#">113258317</a> | 2.377385591 | 1.249376 | 0.016062 | 0.041813 |
| KLHDC2       | <a href="#">113266198</a> | 2.376020379 | 1.248547 | 0.001682 | 0.006056 |
| PTCH1        | <a href="#">113269779</a> | 2.37434622  | 1.24753  | 0.002943 | 0.009856 |
| TRAP1        | <a href="#">113270859</a> | 2.371511455 | 1.245807 | 0.001742 | 0.006242 |
| MRPL4        | <a href="#">113242977</a> | 2.370860766 | 1.245411 | 0.002304 | 0.007958 |
| MRPL30       | <a href="#">113246927</a> | 2.370041822 | 1.244913 | 0.003246 | 0.010702 |
| PEX2         | <a href="#">113253032</a> | 2.369846779 | 1.244794 | 0.002866 | 0.009619 |
| FAIM         | <a href="#">113253988</a> | 2.369662354 | 1.244682 | 0.016543 | 0.042873 |
| HSF2         | <a href="#">113259403</a> | 2.368368729 | 1.243894 | 0.00104  | 0.003981 |
| LOC113248653 | <a href="#">113248653</a> | 2.367782311 | 1.243536 | 0.005131 | 0.015945 |
| RNF217       | <a href="#">113259409</a> | 2.367567955 | 1.243406 | 0.00255  | 0.008693 |
| SLC35A4      | <a href="#">113261830</a> | 2.367073255 | 1.243104 | 0.001102 | 0.004186 |
| FRAS1        | <a href="#">113263237</a> | 2.365722233 | 1.242281 | 0.008895 | 0.025327 |
| ANKRD28      | <a href="#">113253911</a> | 2.365104348 | 1.241904 | 0.001506 | 0.005519 |
| MECOM        | <a href="#">113255350</a> | 2.364013954 | 1.241239 | 0.006584 | 0.019697 |
| TUSC2        | <a href="#">113256909</a> | 2.363518018 | 1.240936 | 0.001526 | 0.005579 |
| DCTN6        | <a href="#">113262126</a> | 2.357285868 | 1.237127 | 0.002107 | 0.007366 |
| CLASP1       | <a href="#">113263468</a> | 2.356227095 | 1.236479 | 0.001724 | 0.006187 |
| ZNF205       | <a href="#">113245431</a> | 2.356189668 | 1.236456 | 0.006757 | 0.020116 |
| POP5         | <a href="#">113267048</a> | 2.354914719 | 1.235675 | 0.00145  | 0.005331 |
| NAMPT        | <a href="#">113258637</a> | 2.353798466 | 1.234991 | 0.016242 | 0.042219 |
| PSMB6        | <a href="#">113271086</a> | 2.352656647 | 1.234291 | 0.002819 | 0.009489 |
| ZC3HC1       | <a href="#">113264149</a> | 2.351136217 | 1.233358 | 0.00138  | 0.00511  |
| LOC113250022 | <a href="#">113250022</a> | 2.34921651  | 1.23218  | 0.015193 | 0.039912 |

|              |                           |             |          |          |          |
|--------------|---------------------------|-------------|----------|----------|----------|
| PTPRB        | <a href="#">113256273</a> | 2.349074371 | 1.232092 | 0.001722 | 0.006181 |
| AFG3L2       | <a href="#">113245913</a> | 2.348622901 | 1.231815 | 0.008155 | 0.023561 |
| MLST8        | <a href="#">113245112</a> | 2.348169302 | 1.231536 | 0.002291 | 0.007927 |
| UFSP1        | <a href="#">113267845</a> | 2.348039732 | 1.231457 | 0.017156 | 0.044197 |
| SMYD4        | <a href="#">113269128</a> | 2.345655902 | 1.229991 | 0.000947 | 0.003675 |
| RND3         | <a href="#">113250895</a> | 2.342853253 | 1.228267 | 0.001812 | 0.00646  |
| RAMP2        | <a href="#">113265404</a> | 2.341893952 | 1.227676 | 0.003328 | 0.010944 |
| TNKS2        | <a href="#">113243161</a> | 2.340985499 | 1.227116 | 0.003916 | 0.012565 |
| ZBTB46       | <a href="#">113258821</a> | 2.33798233  | 1.225264 | 0.001405 | 0.005186 |
| UXT          | <a href="#">113265998</a> | 2.336714665 | 1.224482 | 0.000959 | 0.003711 |
| FYTTD1       | <a href="#">113252775</a> | 2.335879753 | 1.223966 | 0.001937 | 0.006837 |
| APOOL        | <a href="#">113242162</a> | 2.334985923 | 1.223414 | 0.002707 | 0.009165 |
| KTN1         | <a href="#">113242338</a> | 2.334924958 | 1.223376 | 0.007812 | 0.022752 |
| CSPG4        | <a href="#">113240998</a> | 2.332904395 | 1.222127 | 0.014029 | 0.037288 |
| RCC1L        | <a href="#">113267767</a> | 2.330764046 | 1.220803 | 0.000863 | 0.003391 |
| DTWD1        | <a href="#">113269605</a> | 2.330423168 | 1.220592 | 0.006728 | 0.020061 |
| FLII         | <a href="#">113271289</a> | 2.330387953 | 1.22057  | 0.012138 | 0.032939 |
| LOC113245563 | <a href="#">113245563</a> | 2.329619497 | 1.220094 | 0.002384 | 0.008196 |
| MICALL1      | <a href="#">113241788</a> | 2.328784883 | 1.219577 | 0.000593 | 0.002441 |
| GINM1        | <a href="#">113259546</a> | 2.328377135 | 1.219325 | 0.000948 | 0.003678 |
| PTPN4        | <a href="#">113263458</a> | 2.326198937 | 1.217974 | 0.001689 | 0.006077 |
| ZNF704       | <a href="#">113253012</a> | 2.325940328 | 1.217814 | 0.002186 | 0.007616 |
| PHC1         | <a href="#">113257919</a> | 2.323630676 | 1.216381 | 0.000981 | 0.003782 |
| BCL7A        | <a href="#">113266930</a> | 2.323191013 | 1.216108 | 0.003608 | 0.011741 |
| SOBP         | <a href="#">113264771</a> | 2.32264781  | 1.21577  | 0.002763 | 0.00933  |
| MTSS1L       | <a href="#">113251737</a> | 2.321956658 | 1.215341 | 0.000969 | 0.00374  |
| EVPL         | <a href="#">113244608</a> | 2.319853878 | 1.214034 | 0.019532 | 0.049328 |
| TMEM250      | <a href="#">113266597</a> | 2.317077481 | 1.212306 | 0.002087 | 0.007299 |

|              |                           |             |          |          |          |
|--------------|---------------------------|-------------|----------|----------|----------|
| RTRAF        | <a href="#">113242380</a> | 2.316127933 | 1.211715 | 0.008329 | 0.023961 |
| LOC113249372 | <a href="#">113249372</a> | 2.315117905 | 1.211086 | 0.004372 | 0.013828 |
| LOC113246034 | <a href="#">113246034</a> | 2.313958548 | 1.210363 | 0.004448 | 0.014043 |
| MRPL23       | <a href="#">113243957</a> | 2.312888569 | 1.209696 | 0.002643 | 0.008965 |
| TMEM109      | <a href="#">113247003</a> | 2.311465397 | 1.208808 | 0.006187 | 0.018722 |
| DET1         | <a href="#">113263675</a> | 2.307750424 | 1.206487 | 0.001142 | 0.004325 |
| AKAP7        | <a href="#">113259446</a> | 2.307526408 | 1.206347 | 0.008646 | 0.024725 |
| EIF3J        | <a href="#">113241944</a> | 2.307274448 | 1.20619  | 0.00153  | 0.005593 |
| MRPL2        | <a href="#">113261278</a> | 2.306956562 | 1.205991 | 0.004359 | 0.01379  |
| ZFP91        | <a href="#">113246399</a> | 2.306768242 | 1.205873 | 0.002194 | 0.007638 |
| CHMP7        | <a href="#">113269987</a> | 2.30508822  | 1.204822 | 0.001607 | 0.005826 |
| TTBK2        | <a href="#">113241979</a> | 2.305083683 | 1.204819 | 0.003832 | 0.012359 |
| CDKN1C       | <a href="#">113243966</a> | 2.303842272 | 1.204042 | 0.003036 | 0.010111 |
| ZKSCAN5      | <a href="#">113267889</a> | 2.297009871 | 1.199757 | 0.002349 | 0.008083 |
| LOC113246791 | <a href="#">113246791</a> | 2.295944221 | 1.199088 | 0.002916 | 0.009773 |
| MMP24OS      | <a href="#">113258533</a> | 2.295800921 | 1.198998 | 0.006501 | 0.019511 |
| PNRC1        | <a href="#">113264836</a> | 2.294229698 | 1.19801  | 0.005149 | 0.01599  |
| POLR2F       | <a href="#">113241794</a> | 2.293460889 | 1.197526 | 0.002323 | 0.008017 |
| CACNA1C      | <a href="#">113258052</a> | 2.292589207 | 1.196978 | 0.016857 | 0.043545 |
| LOC113248147 | <a href="#">113248147</a> | 2.29234737  | 1.196826 | 0.002453 | 0.008404 |
| SELENOH      | <a href="#">113246412</a> | 2.291741208 | 1.196444 | 0.001413 | 0.005212 |
| FAM220A      | <a href="#">113267940</a> | 2.291630422 | 1.196374 | 0.002054 | 0.007195 |
| FAM107A      | <a href="#">113257027</a> | 2.291165325 | 1.196082 | 0.004469 | 0.0141   |
| ACOT6        | <a href="#">113270358</a> | 2.289989159 | 1.195341 | 0.018479 | 0.047046 |
| C1QBP        | <a href="#">113271068</a> | 2.287869834 | 1.194005 | 0.003907 | 0.012546 |
| PLA2G12A     | <a href="#">113255558</a> | 2.285625614 | 1.192589 | 0.003445 | 0.011285 |
| FIS1         | <a href="#">113267833</a> | 2.283436833 | 1.191207 | 0.014986 | 0.039455 |
| ZNF667       | <a href="#">113248541</a> | 2.276697215 | 1.186942 | 0.004715 | 0.014808 |

|              |                           |             |          |          |          |
|--------------|---------------------------|-------------|----------|----------|----------|
| PLGRKT       | <a href="#">113270155</a> | 2.276113101 | 1.186572 | 0.008474 | 0.024307 |
| RAB33B       | <a href="#">113255687</a> | 2.275859951 | 1.186412 | 0.001279 | 0.004778 |
| BBIP1        | <a href="#">113251929</a> | 2.275766489 | 1.186353 | 0.003868 | 0.012438 |
| RERE         | <a href="#">113270548</a> | 2.274007245 | 1.185237 | 0.008469 | 0.024298 |
| MRPS34       | <a href="#">113245131</a> | 2.273070671 | 1.184643 | 0.003074 | 0.010222 |
| HIPK3        | <a href="#">113265060</a> | 2.272814497 | 1.18448  | 0.013286 | 0.035556 |
| GATB         | <a href="#">113255756</a> | 2.272181881 | 1.184078 | 0.003995 | 0.012792 |
| SMIM4        | <a href="#">113256962</a> | 2.270601542 | 1.183075 | 0.012445 | 0.033631 |
| CNOT7        | <a href="#">113262161</a> | 2.266575897 | 1.180514 | 0.000906 | 0.003532 |
| PLS3         | <a href="#">113241253</a> | 2.264571597 | 1.179238 | 0.007404 | 0.021718 |
| PER1         | <a href="#">113271140</a> | 2.264211923 | 1.179009 | 0.003375 | 0.011077 |
| CLDN12       | <a href="#">113259732</a> | 2.26414949  | 1.178969 | 0.007202 | 0.021227 |
| MTERF2       | <a href="#">113256032</a> | 2.263751319 | 1.178715 | 0.005025 | 0.015657 |
| ARL2         | <a href="#">113244145</a> | 2.262811449 | 1.178116 | 0.008201 | 0.023651 |
| OPA3         | <a href="#">113243423</a> | 2.262112507 | 1.177671 | 0.002604 | 0.008841 |
| SGTB         | <a href="#">113255279</a> | 2.260831531 | 1.176853 | 0.006584 | 0.019697 |
| LOC113240740 | <a href="#">113240740</a> | 2.260789431 | 1.176827 | 0.001581 | 0.005752 |
| RAC3         | <a href="#">113244670</a> | 2.260555509 | 1.176677 | 0.015906 | 0.041529 |
| CUNH1orf123  | <a href="#">113254652</a> | 2.260092853 | 1.176382 | 0.002195 | 0.007641 |
| LOC113249770 | <a href="#">113249770</a> | 2.259307034 | 1.17588  | 0.002582 | 0.008785 |
| PDE7A        | <a href="#">113268055</a> | 2.258967281 | 1.175663 | 0.006051 | 0.018367 |
| PHB2         | <a href="#">113257947</a> | 2.258782923 | 1.175546 | 0.008691 | 0.024835 |
| TIMM9        | <a href="#">113242320</a> | 2.258510142 | 1.175371 | 0.003965 | 0.012712 |
| EBPL         | <a href="#">113251313</a> | 2.25819667  | 1.175171 | 0.006163 | 0.018659 |
| PDE2A        | <a href="#">113269273</a> | 2.257801259 | 1.174918 | 0.012028 | 0.032683 |
| TSPAN5       | <a href="#">113263124</a> | 2.256965323 | 1.174384 | 0.010706 | 0.029555 |
| SDHAF4       | <a href="#">113261135</a> | 2.255368841 | 1.173363 | 0.002521 | 0.008605 |
| PRKCA        | <a href="#">113265250</a> | 2.255145979 | 1.173221 | 0.001765 | 0.006308 |

|              |                           |             |          |          |          |
|--------------|---------------------------|-------------|----------|----------|----------|
| MTFMT        | <a href="#">113240861</a> | 2.254575134 | 1.172856 | 0.014551 | 0.038442 |
| MRPL40       | <a href="#">113245891</a> | 2.253921045 | 1.172437 | 0.002911 | 0.009759 |
| RABGAP1      | <a href="#">113266382</a> | 2.251856768 | 1.171115 | 0.003474 | 0.011365 |
| MLLT3        | <a href="#">113260585</a> | 2.25152346  | 1.170902 | 0.009879 | 0.02763  |
| LOC113248431 | <a href="#">113248431</a> | 2.250110373 | 1.169996 | 0.005111 | 0.015895 |
| ZBED1        | <a href="#">113240783</a> | 2.248807695 | 1.16916  | 0.003589 | 0.011694 |
| ZNF865       | <a href="#">113247371</a> | 2.247950959 | 1.168611 | 0.002524 | 0.008614 |
| ZNF639       | <a href="#">113254787</a> | 2.247168258 | 1.168108 | 0.002516 | 0.008592 |
| FGD6         | <a href="#">113256139</a> | 2.246797692 | 1.16787  | 0.013057 | 0.035068 |
| PIGBOS1      | <a href="#">113269651</a> | 2.246648709 | 1.167775 | 0.00999  | 0.027888 |
| LYRM7        | <a href="#">113261690</a> | 2.241928525 | 1.16474  | 0.013682 | 0.036459 |
| KIAA1328     | <a href="#">113253353</a> | 2.241476257 | 1.164449 | 0.005475 | 0.01685  |
| CUNH1orf50   | <a href="#">113254804</a> | 2.241279184 | 1.164322 | 0.008073 | 0.023378 |
| LOC113249854 | <a href="#">113249854</a> | 2.240700025 | 1.16395  | 0.009668 | 0.02716  |
| OPLAH        | <a href="#">113247625</a> | 2.239194943 | 1.16298  | 0.002728 | 0.009219 |
| MCF2L        | <a href="#">113247581</a> | 2.238096005 | 1.162272 | 0.009454 | 0.026643 |
| BBS7         | <a href="#">113255630</a> | 2.237866259 | 1.162124 | 0.012024 | 0.032683 |
| EIF2S3       | <a href="#">113242224</a> | 2.237836375 | 1.162105 | 0.017309 | 0.044518 |
| FAM219B      | <a href="#">113240980</a> | 2.235563865 | 1.160639 | 0.002588 | 0.008797 |
| CA9          | <a href="#">113260473</a> | 2.234046993 | 1.15966  | 0.014917 | 0.039292 |
| PPP1R15A     | <a href="#">113243327</a> | 2.233534366 | 1.159328 | 0.001987 | 0.00699  |
| NCKAP1       | <a href="#">113250692</a> | 2.233423846 | 1.159257 | 0.007226 | 0.021284 |
| COPS7A       | <a href="#">113257966</a> | 2.232859454 | 1.158892 | 0.003485 | 0.011397 |
| MAG11        | <a href="#">113257053</a> | 2.231518269 | 1.158026 | 0.010873 | 0.029948 |
| MGRN1        | <a href="#">113270841</a> | 2.228580508 | 1.156125 | 0.001921 | 0.006785 |
| CNTF         | <a href="#">113246400</a> | 2.228488986 | 1.156066 | 0.003022 | 0.010071 |
| POLR3D       | <a href="#">113270004</a> | 2.228311783 | 1.155951 | 0.002282 | 0.007899 |
| FAM76A       | <a href="#">113268432</a> | 2.227774214 | 1.155603 | 0.002354 | 0.0081   |

|              |                           |             |          |          |          |
|--------------|---------------------------|-------------|----------|----------|----------|
| ORAI1        | <a href="#">113266942</a> | 2.227579143 | 1.155477 | 0.002591 | 0.008806 |
| NOP53        | <a href="#">113243362</a> | 2.227418441 | 1.155373 | 0.017391 | 0.044686 |
| LOC113248319 | <a href="#">113248319</a> | 2.22686513  | 1.155014 | 0.0047   | 0.014769 |
| TTC1         | <a href="#">113264040</a> | 2.224354884 | 1.153387 | 0.002177 | 0.007586 |
| TEK          | <a href="#">113260555</a> | 2.223473379 | 1.152815 | 0.001245 | 0.004666 |
| CYYR1        | <a href="#">113269125</a> | 2.223401948 | 1.152769 | 0.003628 | 0.011795 |
| PAIP1        | <a href="#">113260958</a> | 2.22266773  | 1.152292 | 0.003536 | 0.011542 |
| TFB1M        | <a href="#">113259582</a> | 2.222245764 | 1.152018 | 0.004724 | 0.014828 |
| SLC2A12      | <a href="#">113259466</a> | 2.220194204 | 1.150686 | 0.007457 | 0.021854 |
| HS6ST1       | <a href="#">113263500</a> | 2.218589024 | 1.149642 | 0.003016 | 0.01006  |
| LIPT1        | <a href="#">113246901</a> | 2.218024864 | 1.149276 | 0.010494 | 0.029068 |
| PHLDB1       | <a href="#">113259986</a> | 2.216150331 | 1.148056 | 0.01656  | 0.042891 |
| FAT4         | <a href="#">113255648</a> | 2.215350561 | 1.147535 | 0.005755 | 0.017585 |
| UTP18        | <a href="#">113265640</a> | 2.215206534 | 1.147441 | 0.003352 | 0.011013 |
| ARHGAP5      | <a href="#">113266109</a> | 2.21291837  | 1.14595  | 0.008174 | 0.023601 |
| SEC22C       | <a href="#">113253823</a> | 2.212726037 | 1.145825 | 0.001913 | 0.006763 |
| MIPEP        | <a href="#">113251186</a> | 2.212469722 | 1.145658 | 0.006783 | 0.020166 |
| ITPA         | <a href="#">113258397</a> | 2.211780973 | 1.145209 | 0.00313  | 0.010378 |
| EVI5L        | <a href="#">113242919</a> | 2.210986386 | 1.14469  | 0.006156 | 0.01864  |
| ALDH5A1      | <a href="#">113264335</a> | 2.210943808 | 1.144662 | 0.016594 | 0.042946 |
| TOMM6        | <a href="#">113261308</a> | 2.210682202 | 1.144492 | 0.005552 | 0.017043 |
| MAP2K4       | <a href="#">113271224</a> | 2.20985546  | 1.143952 | 0.003091 | 0.010262 |
| ABHD8        | <a href="#">113256672</a> | 2.209305576 | 1.143593 | 0.004851 | 0.015178 |
| TMEM140      | <a href="#">113264458</a> | 2.208074773 | 1.142789 | 0.004172 | 0.013285 |
| ANXA3        | <a href="#">113263239</a> | 2.204690208 | 1.140576 | 0.00684  | 0.020301 |
| ST6GALNAC6   | <a href="#">113266442</a> | 2.203833264 | 1.140015 | 0.018869 | 0.047894 |
| PRKCE        | <a href="#">113246159</a> | 2.203584231 | 1.139852 | 0.009615 | 0.027026 |
| UBFD1        | <a href="#">113267577</a> | 2.202498278 | 1.139141 | 0.003043 | 0.010129 |

|            |                           |             |          |          |          |
|------------|---------------------------|-------------|----------|----------|----------|
| CAMLG      | <a href="#">113261747</a> | 2.201559978 | 1.138526 | 0.003467 | 0.011344 |
| CCDC58     | <a href="#">113252235</a> | 2.199049937 | 1.13688  | 0.01351  | 0.03607  |
| PSMD7      | <a href="#">113252438</a> | 2.197318876 | 1.135744 | 0.003568 | 0.011634 |
| MARCH6     | <a href="#">113260817</a> | 2.196284803 | 1.135065 | 0.013242 | 0.035468 |
| PAK1       | <a href="#">113269353</a> | 2.196180183 | 1.134996 | 0.01204  | 0.032705 |
| KLF10      | <a href="#">113252856</a> | 2.194227081 | 1.133713 | 0.002588 | 0.008797 |
| STN1       | <a href="#">113251897</a> | 2.194042433 | 1.133591 | 0.002394 | 0.008222 |
| RIOX2      | <a href="#">113250339</a> | 2.192386072 | 1.132502 | 0.006514 | 0.019548 |
| DUSP1      | <a href="#">113264095</a> | 2.191996959 | 1.132246 | 0.009484 | 0.026717 |
| SEC61A2    | <a href="#">113241066</a> | 2.191796701 | 1.132114 | 0.014527 | 0.038402 |
| CSGALNACT1 | <a href="#">113245577</a> | 2.190190039 | 1.131056 | 0.005932 | 0.018054 |
| ZNF775     | <a href="#">113241469</a> | 2.187108254 | 1.129025 | 0.006388 | 0.019219 |
| NIT2       | <a href="#">113250540</a> | 2.186257582 | 1.128463 | 0.004034 | 0.012911 |
| ZNHIT3     | <a href="#">113268916</a> | 2.185055262 | 1.12767  | 0.018313 | 0.046685 |
| RCHY1      | <a href="#">113263266</a> | 2.184495845 | 1.1273   | 0.003636 | 0.011811 |
| RNF113A    | <a href="#">113241284</a> | 2.183172314 | 1.126426 | 0.010321 | 0.028684 |
| CUNH1orf52 | <a href="#">113254470</a> | 2.183111634 | 1.126386 | 0.008106 | 0.023462 |
| SOCS6      | <a href="#">113253516</a> | 2.182506418 | 1.125986 | 0.001902 | 0.006729 |
| MLX        | <a href="#">113265415</a> | 2.182279062 | 1.125836 | 0.005282 | 0.016331 |
| MOSMO      | <a href="#">113267551</a> | 2.181229331 | 1.125141 | 0.014182 | 0.037592 |
| RAD23B     | <a href="#">113260344</a> | 2.18022187  | 1.124475 | 0.014135 | 0.037506 |
| AKAP2      | <a href="#">113260334</a> | 2.180005752 | 1.124332 | 0.003327 | 0.010942 |
| TSPAN17    | <a href="#">113264132</a> | 2.179116972 | 1.123744 | 0.007518 | 0.022009 |
| SNAPIN     | <a href="#">113245335</a> | 2.179050634 | 1.1237   | 0.004697 | 0.014762 |
| LAMA5      | <a href="#">113258790</a> | 2.178366672 | 1.123247 | 0.016227 | 0.042192 |
| NTPCR      | <a href="#">113259022</a> | 2.177822944 | 1.122887 | 0.005386 | 0.016621 |
| TCP1       | <a href="#">113259618</a> | 2.177180952 | 1.122461 | 0.017289 | 0.044488 |
| CUNH9orf3  | <a href="#">113269782</a> | 2.176627882 | 1.122095 | 0.007356 | 0.021597 |

|             |                           |             |          |          |          |
|-------------|---------------------------|-------------|----------|----------|----------|
| PCMTD1      | <a href="#">113268108</a> | 2.175582729 | 1.121402 | 0.005991 | 0.018213 |
| MRPL39      | <a href="#">113269991</a> | 2.174231156 | 1.120505 | 0.004075 | 0.013012 |
| TULP4       | <a href="#">113259603</a> | 2.174219163 | 1.120497 | 0.008286 | 0.023861 |
| NENF        | <a href="#">113262675</a> | 2.172515007 | 1.119366 | 0.004827 | 0.015123 |
| GON7        | <a href="#">113267335</a> | 2.172127801 | 1.119109 | 0.007306 | 0.021481 |
| REX1BD      | <a href="#">113256726</a> | 2.172055124 | 1.119061 | 0.007061 | 0.02087  |
| UCHL3       | <a href="#">113251425</a> | 2.169894608 | 1.117625 | 0.013209 | 0.035384 |
| CUNH18orf25 | <a href="#">113253377</a> | 2.168930667 | 1.116984 | 0.003091 | 0.010262 |
| AFF4        | <a href="#">113261726</a> | 2.168254019 | 1.116534 | 0.004211 | 0.013389 |
| FARS2       | <a href="#">113264417</a> | 2.168183583 | 1.116487 | 0.011835 | 0.03225  |
| SLMAP       | <a href="#">113257009</a> | 2.166749613 | 1.115532 | 0.006627 | 0.019811 |
| RNF126      | <a href="#">113242698</a> | 2.165357777 | 1.114605 | 0.006583 | 0.019697 |
| FASTKD3     | <a href="#">113260808</a> | 2.165300065 | 1.114567 | 0.019822 | 0.049863 |
| PKD1        | <a href="#">113245185</a> | 2.164645153 | 1.114131 | 0.011157 | 0.030619 |
| TPRKB       | <a href="#">113243931</a> | 2.164181843 | 1.113822 | 0.008716 | 0.024889 |
| ZNF629      | <a href="#">113267696</a> | 2.162994623 | 1.11303  | 0.005185 | 0.016092 |
| BRF1        | <a href="#">113267180</a> | 2.161559477 | 1.112073 | 0.002027 | 0.007111 |
| CIR1        | <a href="#">113250759</a> | 2.157819374 | 1.109574 | 0.003571 | 0.011639 |
| SUPV3L1     | <a href="#">113259126</a> | 2.157306024 | 1.109231 | 0.005153 | 0.016    |
| TEN1        | <a href="#">113244615</a> | 2.156326612 | 1.108576 | 0.010553 | 0.029196 |
| ARHGAP10    | <a href="#">113255740</a> | 2.154797472 | 1.107552 | 0.011911 | 0.032432 |
| RRNAD1      | <a href="#">113245219</a> | 2.154283985 | 1.107208 | 0.005381 | 0.016615 |
| PIM3        | <a href="#">113241626</a> | 2.15081447  | 1.104883 | 0.003745 | 0.012109 |
| VAPA        | <a href="#">113253213</a> | 2.149306722 | 1.103871 | 0.015933 | 0.041583 |
| MRTFB       | <a href="#">113270776</a> | 2.146943492 | 1.102284 | 0.012628 | 0.034057 |
| IRGQ        | <a href="#">113243492</a> | 2.146065445 | 1.101694 | 0.003028 | 0.010088 |
| DCUN1D5     | <a href="#">113260132</a> | 2.145211629 | 1.10112  | 0.007605 | 0.022246 |
| NPR1        | <a href="#">113245333</a> | 2.141151951 | 1.098387 | 0.011588 | 0.031661 |

|              |                           |             |          |          |          |
|--------------|---------------------------|-------------|----------|----------|----------|
| PCBD1        | <a href="#">113259147</a> | 2.14058762  | 1.098007 | 0.005725 | 0.017511 |
| BRI3         | <a href="#">113267926</a> | 2.13920483  | 1.097075 | 0.004544 | 0.014311 |
| JOSD2        | <a href="#">113247298</a> | 2.13855448  | 1.096636 | 0.003444 | 0.011285 |
| TOR1AIP1     | <a href="#">113262694</a> | 2.137411416 | 1.095865 | 0.00625  | 0.018871 |
| PFDN5        | <a href="#">113257559</a> | 2.134731076 | 1.094054 | 0.006435 | 0.019335 |
| MRPS33       | <a href="#">113265203</a> | 2.133599301 | 1.093289 | 0.004183 | 0.013317 |
| MDM2         | <a href="#">113256295</a> | 2.133236279 | 1.093044 | 0.00514  | 0.015965 |
| HAS3         | <a href="#">113252417</a> | 2.13252626  | 1.092564 | 0.016021 | 0.041734 |
| TBKBP1       | <a href="#">113265554</a> | 2.12852895  | 1.089857 | 0.016425 | 0.042616 |
| VAPB         | <a href="#">113258765</a> | 2.124596463 | 1.087189 | 0.007948 | 0.02308  |
| KLHL7        | <a href="#">113261355</a> | 2.124019368 | 1.086797 | 0.003254 | 0.010726 |
| PDZD2        | <a href="#">113260852</a> | 2.124008269 | 1.086789 | 0.013279 | 0.035545 |
| PGBD1        | <a href="#">113248151</a> | 2.123513511 | 1.086453 | 0.019282 | 0.048834 |
| SDC4         | <a href="#">113258649</a> | 2.121876456 | 1.085341 | 0.00675  | 0.020108 |
| BLZF1        | <a href="#">113262863</a> | 2.121468701 | 1.085063 | 0.003811 | 0.0123   |
| CRIP1        | <a href="#">113246107</a> | 2.121446929 | 1.085049 | 0.004045 | 0.012941 |
| NES          | <a href="#">113245223</a> | 2.121209369 | 1.084887 | 0.007617 | 0.022262 |
| LOC113256935 | <a href="#">113256935</a> | 2.120999125 | 1.084744 | 0.016962 | 0.043782 |
| PRKACA       | <a href="#">113247197</a> | 2.120383005 | 1.084325 | 0.00748  | 0.021909 |
| LDLRAD4      | <a href="#">113245900</a> | 2.120175605 | 1.084184 | 0.012842 | 0.034592 |
| PPP1R13B     | <a href="#">113267205</a> | 2.118783348 | 1.083236 | 0.004332 | 0.013717 |
| CUNH16orf70  | <a href="#">113252344</a> | 2.117046673 | 1.082053 | 0.004163 | 0.013265 |
| PCNX1        | <a href="#">113270377</a> | 2.115226954 | 1.080812 | 0.006237 | 0.01884  |
| ZNF550       | <a href="#">113247988</a> | 2.112918318 | 1.079237 | 0.013882 | 0.036911 |
| PIK3R3       | <a href="#">113254730</a> | 2.11211251  | 1.078687 | 0.014531 | 0.038404 |
| MRPL14       | <a href="#">113261251</a> | 2.11182339  | 1.078489 | 0.006332 | 0.019079 |
| ZFYVE9       | <a href="#">113254667</a> | 2.110000958 | 1.077244 | 0.005448 | 0.016777 |
| CAMTA2       | <a href="#">113271056</a> | 2.109955378 | 1.077212 | 0.004238 | 0.013466 |

|              |                           |             |          |          |          |
|--------------|---------------------------|-------------|----------|----------|----------|
| GABARAPL2    | <a href="#">113252504</a> | 2.109824285 | 1.077123 | 0.006058 | 0.018382 |
| ANGEL1       | <a href="#">113270304</a> | 2.107184236 | 1.075316 | 0.011741 | 0.032026 |
| LMAN2L       | <a href="#">113246590</a> | 2.107181117 | 1.075314 | 0.009102 | 0.025807 |
| MRPL55       | <a href="#">113247506</a> | 2.106968975 | 1.075169 | 0.007609 | 0.022251 |
| MAP3K14      | <a href="#">113265323</a> | 2.104995358 | 1.073817 | 0.003552 | 0.011588 |
| CDC42EP2     | <a href="#">113244118</a> | 2.104675206 | 1.073598 | 0.008362 | 0.024036 |
| NCKAP5L      | <a href="#">113257641</a> | 2.103399311 | 1.072723 | 0.003391 | 0.01112  |
| DCTN3        | <a href="#">113260505</a> | 2.103180161 | 1.072572 | 0.006894 | 0.020429 |
| MIA2         | <a href="#">113266157</a> | 2.102945431 | 1.072411 | 0.008034 | 0.023291 |
| ANKRA2       | <a href="#">113255219</a> | 2.099864898 | 1.070297 | 0.010058 | 0.028038 |
| VSIG10       | <a href="#">113267020</a> | 2.099206089 | 1.069844 | 0.010626 | 0.029369 |
| ST7L         | <a href="#">113244418</a> | 2.09892262  | 1.069649 | 0.005096 | 0.015859 |
| MAST4        | <a href="#">113255270</a> | 2.098318771 | 1.069234 | 0.00656  | 0.019649 |
| UBE3A        | <a href="#">113263593</a> | 2.092809696 | 1.065441 | 0.010441 | 0.028952 |
| REPS1        | <a href="#">113259497</a> | 2.092479029 | 1.065213 | 0.006568 | 0.019665 |
| NDUFAF7      | <a href="#">113241364</a> | 2.092119459 | 1.064965 | 0.004934 | 0.015413 |
| ATP9A        | <a href="#">113258730</a> | 2.091767442 | 1.064722 | 0.018187 | 0.046388 |
| TEFM         | <a href="#">113268996</a> | 2.090677021 | 1.06397  | 0.01773  | 0.045419 |
| RPS6KA3      | <a href="#">113242238</a> | 2.090370727 | 1.063759 | 0.007828 | 0.022786 |
| DPY30        | <a href="#">113240973</a> | 2.086797236 | 1.06129  | 0.003079 | 0.010233 |
| VPS37A       | <a href="#">113262159</a> | 2.085010432 | 1.060055 | 0.004848 | 0.015177 |
| MAGED1       | <a href="#">113248824</a> | 2.081315572 | 1.057496 | 0.010743 | 0.029633 |
| IPPK         | <a href="#">113270091</a> | 2.081162974 | 1.05739  | 0.005648 | 0.017302 |
| LOC113248525 | <a href="#">113248525</a> | 2.075767449 | 1.053645 | 0.010555 | 0.029196 |
| PPP3R1       | <a href="#">113244743</a> | 2.07571988  | 1.053612 | 0.019726 | 0.049717 |
| HDHC2        | <a href="#">113259412</a> | 2.075608437 | 1.053534 | 0.007194 | 0.021212 |
| KLHDC10      | <a href="#">113264155</a> | 2.075309577 | 1.053327 | 0.006971 | 0.02064  |
| PTPN21       | <a href="#">113267384</a> | 2.072394906 | 1.051299 | 0.009706 | 0.027232 |

|              |                           |             |          |          |          |
|--------------|---------------------------|-------------|----------|----------|----------|
| S1PR1        | <a href="#">113254338</a> | 2.069265041 | 1.049118 | 0.009202 | 0.026064 |
| RPS27L       | <a href="#">113269713</a> | 2.068841709 | 1.048823 | 0.007691 | 0.022434 |
| FARP1        | <a href="#">113251485</a> | 2.067948001 | 1.0482   | 0.005845 | 0.017833 |
| CISD3        | <a href="#">113265543</a> | 2.066838351 | 1.047426 | 0.015515 | 0.040634 |
| LOC113247090 | <a href="#">113247090</a> | 2.064064055 | 1.045488 | 0.018665 | 0.047448 |
| BOLA1        | <a href="#">113246109</a> | 2.063833714 | 1.045327 | 0.006589 | 0.019705 |
| TXN2         | <a href="#">113255991</a> | 2.060723806 | 1.043151 | 0.010638 | 0.029389 |
| ARL1         | <a href="#">113256094</a> | 2.060593123 | 1.04306  | 0.016353 | 0.042477 |
| TSG101       | <a href="#">113265122</a> | 2.059197451 | 1.042082 | 0.007617 | 0.022262 |
| KAT8         | <a href="#">113267718</a> | 2.057254003 | 1.04072  | 0.004253 | 0.013508 |
| ARNT2        | <a href="#">113263574</a> | 2.05699608  | 1.040539 | 0.0145   | 0.038338 |
| RABGGTA      | <a href="#">113246008</a> | 2.051709    | 1.036826 | 0.005271 | 0.016305 |
| MRPS18B      | <a href="#">113264365</a> | 2.051383261 | 1.036597 | 0.013149 | 0.035259 |
| WISP2        | <a href="#">113258639</a> | 2.050300699 | 1.035836 | 0.015284 | 0.040118 |
| NFS1         | <a href="#">113258544</a> | 2.049901287 | 1.035554 | 0.014646 | 0.038679 |
| RRP7A        | <a href="#">113241695</a> | 2.0493664   | 1.035178 | 0.008111 | 0.023467 |
| MRPL10       | <a href="#">113265560</a> | 2.048943121 | 1.03488  | 0.01019  | 0.028372 |
| MRPS14       | <a href="#">113262800</a> | 2.048244571 | 1.034388 | 0.013248 | 0.03547  |
| TMEM201      | <a href="#">113270539</a> | 2.048088172 | 1.034278 | 0.01809  | 0.046178 |
| RER1         | <a href="#">113270608</a> | 2.047399103 | 1.033792 | 0.010001 | 0.027915 |
| TUT4         | <a href="#">113254666</a> | 2.046820142 | 1.033384 | 0.007314 | 0.021495 |
| RASGRP3      | <a href="#">113241175</a> | 2.044690319 | 1.031882 | 0.007281 | 0.021422 |
| TTL          | <a href="#">113242468</a> | 2.043335086 | 1.030926 | 0.007621 | 0.022263 |
| TMEM242      | <a href="#">113259595</a> | 2.042183682 | 1.030113 | 0.008438 | 0.024218 |
| LOC113249905 | <a href="#">113249905</a> | 2.042031871 | 1.030005 | 0.016285 | 0.042325 |
| FOXJ3        | <a href="#">113254815</a> | 2.039762491 | 1.028401 | 0.006302 | 0.019002 |
| MTOR         | <a href="#">113270510</a> | 2.039016695 | 1.027874 | 0.009872 | 0.027617 |
| MUS81        | <a href="#">113244088</a> | 2.038036516 | 1.02718  | 0.003404 | 0.01116  |

|              |                           |             |          |          |          |
|--------------|---------------------------|-------------|----------|----------|----------|
| LOC113248505 | <a href="#">113248505</a> | 2.036414337 | 1.026031 | 0.013    | 0.034957 |
| MRPL57       | <a href="#">113251178</a> | 2.036129813 | 1.02583  | 0.017126 | 0.044137 |
| OTUD7B       | <a href="#">113246121</a> | 2.03602031  | 1.025752 | 0.008332 | 0.023964 |
| LOC113249903 | <a href="#">113249903</a> | 2.036015978 | 1.025749 | 0.017834 | 0.045625 |
| ZDHHC4       | <a href="#">113267945</a> | 2.036013495 | 1.025747 | 0.016752 | 0.043306 |
| BAG1         | <a href="#">113260655</a> | 2.034930997 | 1.02498  | 0.015957 | 0.041632 |
| APBB2        | <a href="#">113262436</a> | 2.034899098 | 1.024957 | 0.003213 | 0.010618 |
| NUFIP1       | <a href="#">113251357</a> | 2.031336481 | 1.022429 | 0.017233 | 0.044364 |
| COPS8        | <a href="#">113250304</a> | 2.031315131 | 1.022414 | 0.010019 | 0.027952 |
| MRPS17       | <a href="#">113267731</a> | 2.031220092 | 1.022347 | 0.010396 | 0.028859 |
| LOC113248526 | <a href="#">113248526</a> | 2.030376829 | 1.021748 | 0.016727 | 0.043251 |
| RAB28        | <a href="#">113266684</a> | 2.022698862 | 1.016282 | 0.015655 | 0.040968 |
| MKRN2        | <a href="#">113257192</a> | 2.021812104 | 1.015649 | 0.008656 | 0.024745 |
| PRELID3B     | <a href="#">113258772</a> | 2.021065576 | 1.015116 | 0.012019 | 0.032683 |
| DNAJC4       | <a href="#">113244185</a> | 2.020003582 | 1.014358 | 0.009132 | 0.025878 |
| ARIH2        | <a href="#">113256850</a> | 2.018711912 | 1.013435 | 0.006155 | 0.01864  |
| SLC41A1      | <a href="#">113242474</a> | 2.01767028  | 1.01269  | 0.016198 | 0.04213  |
| PELP1        | <a href="#">113271092</a> | 2.016720888 | 1.012011 | 0.00757  | 0.022158 |
| SLF2         | <a href="#">113251839</a> | 2.013701915 | 1.00985  | 0.006832 | 0.020284 |
| NCOR2        | <a href="#">113266878</a> | 2.012637234 | 1.009087 | 0.017872 | 0.045715 |
| MRPL53       | <a href="#">113243720</a> | 2.012417852 | 1.00893  | 0.013207 | 0.035384 |
| ZEB1         | <a href="#">113244240</a> | 2.012349953 | 1.008881 | 0.006734 | 0.020074 |
| DNAAF2       | <a href="#">113266189</a> | 2.012176365 | 1.008757 | 0.015956 | 0.041632 |
| LOC113253334 | <a href="#">113253334</a> | 2.012145022 | 1.008734 | 0.008523 | 0.024421 |
| GTPBP6       | <a href="#">113240797</a> | 2.008214433 | 1.005913 | 0.009012 | 0.025594 |
| CUNH11orf98  | <a href="#">113247002</a> | 2.007615471 | 1.005483 | 0.009675 | 0.02716  |
| KATNAL1      | <a href="#">113251223</a> | 2.007515537 | 1.005411 | 0.011983 | 0.03261  |
| CRBN         | <a href="#">113257101</a> | 2.006116856 | 1.004406 | 0.007484 | 0.021916 |

|              |                           |             |          |          |          |
|--------------|---------------------------|-------------|----------|----------|----------|
| ARPC5L       | <a href="#">113266404</a> | 2.005516689 | 1.003974 | 0.007032 | 0.020799 |
| CUL2         | <a href="#">113244226</a> | 2.003726659 | 1.002686 | 0.006385 | 0.019215 |
| VPS51        | <a href="#">113244128</a> | 2.001258551 | 1.000908 | 0.010315 | 0.028684 |
| LOC113244008 | <a href="#">113244008</a> | 1.997469756 | 0.998174 | 0.00936  | 0.026419 |
| GALNT2       | <a href="#">113259280</a> | 1.997239813 | 0.998008 | 0.008234 | 0.023723 |
| THAP4        | <a href="#">113249348</a> | 1.996898795 | 0.997761 | 0.012967 | 0.034904 |
| CUTA         | <a href="#">113243809</a> | 1.994559842 | 0.99607  | 0.010902 | 0.030016 |
| RAPGEF5      | <a href="#">113261264</a> | 1.994259985 | 0.995854 | 0.012212 | 0.033101 |
| DOCK4        | <a href="#">113262961</a> | 1.992166038 | 0.994338 | 0.011604 | 0.031692 |
| ANKMY2       | <a href="#">113261003</a> | 1.991510573 | 0.993863 | 0.006553 | 0.019638 |
| FOXK1        | <a href="#">113267532</a> | 1.991462212 | 0.993828 | 0.00767  | 0.022382 |
| CBFA2T2      | <a href="#">113258496</a> | 1.990898901 | 0.99342  | 0.007047 | 0.020837 |
| ZNF576       | <a href="#">113243494</a> | 1.98947717  | 0.992389 | 0.011288 | 0.030934 |
| EXO5         | <a href="#">113268225</a> | 1.987498163 | 0.990954 | 0.01644  | 0.042645 |
| MRPS30       | <a href="#">113260961</a> | 1.985884742 | 0.989782 | 0.015999 | 0.041703 |
| ZNF658       | <a href="#">113269767</a> | 1.983934525 | 0.988364 | 0.016054 | 0.041803 |
| SIK1         | <a href="#">113253815</a> | 1.983442468 | 0.988007 | 0.01229  | 0.033265 |
| TSR2         | <a href="#">113247540</a> | 1.978195981 | 0.984185 | 0.010107 | 0.028152 |
| DELE1        | <a href="#">113255368</a> | 1.978141791 | 0.984146 | 0.006041 | 0.018341 |
| TIGD5        | <a href="#">113247635</a> | 1.976157753 | 0.982698 | 0.017793 | 0.045547 |
| CUNH5orf22   | <a href="#">113260851</a> | 1.975949866 | 0.982546 | 0.0104   | 0.028859 |
| KCNMA1       | <a href="#">113259211</a> | 1.975873591 | 0.982491 | 0.01965  | 0.049571 |
| LOC113248019 | <a href="#">113248019</a> | 1.975627028 | 0.982311 | 0.011909 | 0.032432 |
| RNF25        | <a href="#">113250449</a> | 1.975303712 | 0.982074 | 0.016469 | 0.042704 |
| TCF4         | <a href="#">113253440</a> | 1.974822663 | 0.981723 | 0.005545 | 0.017027 |
| SGK1         | <a href="#">113259468</a> | 1.973572814 | 0.98081  | 0.019041 | 0.048286 |
| TXNDC15      | <a href="#">113261751</a> | 1.973278507 | 0.980595 | 0.01076  | 0.029666 |
| LANCL1       | <a href="#">113250507</a> | 1.97096601  | 0.978903 | 0.013611 | 0.03629  |

|              |                           |             |          |          |          |
|--------------|---------------------------|-------------|----------|----------|----------|
| UBXN2A       | <a href="#">113270385</a> | 1.969723211 | 0.977993 | 0.006949 | 0.020579 |
| ADAMTSL4     | <a href="#">113246199</a> | 1.969546845 | 0.977864 | 0.017385 | 0.04468  |
| ZNF280D      | <a href="#">113269663</a> | 1.96900858  | 0.977469 | 0.010841 | 0.029867 |
| MAP2K7       | <a href="#">113242915</a> | 1.965735591 | 0.975069 | 0.010765 | 0.029674 |
| SYNJ2BP      | <a href="#">113270383</a> | 1.963776591 | 0.973631 | 0.010923 | 0.030062 |
| SRP14        | <a href="#">113242044</a> | 1.963417434 | 0.973367 | 0.018768 | 0.047674 |
| ZNF330       | <a href="#">113255703</a> | 1.96264644  | 0.9728   | 0.010972 | 0.030185 |
| TSR1         | <a href="#">113269138</a> | 1.962371198 | 0.972598 | 0.006751 | 0.020108 |
| TIMM17A      | <a href="#">113242544</a> | 1.962180731 | 0.972458 | 0.016577 | 0.042924 |
| ANAPC15      | <a href="#">113269268</a> | 1.961803676 | 0.972181 | 0.013363 | 0.03574  |
| PIP4K2B      | <a href="#">113265540</a> | 1.961090162 | 0.971656 | 0.011875 | 0.032346 |
| E2F6         | <a href="#">113269983</a> | 1.959741658 | 0.970663 | 0.011595 | 0.031674 |
| EIF2B1       | <a href="#">113266890</a> | 1.955998188 | 0.967905 | 0.016975 | 0.043799 |
| TNFAIP1      | <a href="#">113269026</a> | 1.95549555  | 0.967534 | 0.018047 | 0.046093 |
| MAGI3        | <a href="#">113244407</a> | 1.955011599 | 0.967177 | 0.019604 | 0.049485 |
| LOC113243631 | <a href="#">113243631</a> | 1.949713651 | 0.963262 | 0.015739 | 0.041181 |
| NAA38        | <a href="#">113271166</a> | 1.949328801 | 0.962977 | 0.016    | 0.041703 |
| EPM2AIP1     | <a href="#">113253770</a> | 1.947107919 | 0.961333 | 0.013097 | 0.035148 |
| DAAM2        | <a href="#">113243899</a> | 1.947106088 | 0.961331 | 0.013454 | 0.035944 |
| TARS2        | <a href="#">113246206</a> | 1.945133039 | 0.959869 | 0.010605 | 0.029316 |
| WDR33        | <a href="#">113263491</a> | 1.9397777   | 0.955891 | 0.0145   | 0.038338 |
| SASH1        | <a href="#">113259535</a> | 1.939297836 | 0.955534 | 0.00995  | 0.027802 |
| SNUPN        | <a href="#">113240995</a> | 1.938671912 | 0.955069 | 0.017402 | 0.044706 |
| GPS2         | <a href="#">113271126</a> | 1.934274834 | 0.951793 | 0.015611 | 0.040869 |
| MTX2         | <a href="#">113250734</a> | 1.934162306 | 0.951709 | 0.013054 | 0.035066 |
| BTBD3        | <a href="#">113258336</a> | 1.933084609 | 0.950905 | 0.015801 | 0.041318 |
| DHRS3        | <a href="#">113270489</a> | 1.931193238 | 0.949493 | 0.015307 | 0.040152 |
| TMEM218      | <a href="#">113259909</a> | 1.93004691  | 0.948636 | 0.016384 | 0.042533 |

|              |                           |             |          |          |          |
|--------------|---------------------------|-------------|----------|----------|----------|
| VPS50        | <a href="#">113260046</a> | 1.92876844  | 0.94768  | 0.013585 | 0.036228 |
| PRUNE1       | <a href="#">113246187</a> | 1.928594763 | 0.94755  | 0.012187 | 0.033052 |
| LOC113248155 | <a href="#">113248155</a> | 1.923603524 | 0.943811 | 0.015467 | 0.040524 |
| ATP2B1       | <a href="#">113256184</a> | 1.921902142 | 0.942535 | 0.013733 | 0.036565 |
| CLASP2       | <a href="#">113253749</a> | 1.92068636  | 0.941622 | 0.016997 | 0.043848 |
| PDPR         | <a href="#">113252482</a> | 1.91243113  | 0.935408 | 0.01678  | 0.043371 |
| OPA1         | <a href="#">113253461</a> | 1.911455687 | 0.934672 | 0.015226 | 0.039986 |
| IFT172       | <a href="#">113271207</a> | 1.910931725 | 0.934276 | 0.018636 | 0.047392 |
| HSPBP1       | <a href="#">113247405</a> | 1.908394541 | 0.932359 | 0.019432 | 0.049123 |
| MRRF         | <a href="#">113266372</a> | 1.908022665 | 0.932078 | 0.017593 | 0.045128 |
| MRPL46       | <a href="#">113263673</a> | 1.906824658 | 0.931172 | 0.018319 | 0.046692 |
| ODR4         | <a href="#">113262757</a> | 1.905222207 | 0.929959 | 0.009274 | 0.026225 |
| TPP2         | <a href="#">113251515</a> | 1.902730613 | 0.928071 | 0.011057 | 0.030382 |
| ZNF277       | <a href="#">113262977</a> | 1.901909837 | 0.927449 | 0.012976 | 0.034919 |
| TSNAX        | <a href="#">113259031</a> | 1.900731017 | 0.926554 | 0.015095 | 0.039702 |
| MPV17        | <a href="#">113271127</a> | 1.897531056 | 0.924123 | 0.018306 | 0.046676 |
| ACTR8        | <a href="#">113256981</a> | 1.895485453 | 0.922567 | 0.01767  | 0.0453   |
| SPSB3        | <a href="#">113245105</a> | 1.8929978   | 0.920673 | 0.014709 | 0.038823 |
| UBE2M        | <a href="#">113248037</a> | 1.890155083 | 0.918505 | 0.015286 | 0.040118 |
| MTMR6        | <a href="#">113251190</a> | 1.889258111 | 0.91782  | 0.017968 | 0.045934 |
| VWA8         | <a href="#">113251375</a> | 1.884830663 | 0.914435 | 0.012959 | 0.034894 |
| DRAP1        | <a href="#">113244085</a> | 1.87825624  | 0.909394 | 0.0105   | 0.029081 |
| LOC113243118 | <a href="#">113243118</a> | 1.876515061 | 0.908056 | 0.016397 | 0.042549 |
| ARFGAP2      | <a href="#">113264971</a> | 1.873745334 | 0.905925 | 0.017988 | 0.045969 |
| UBIAD1       | <a href="#">113270509</a> | 1.871109738 | 0.903894 | 0.014254 | 0.037767 |
| THAP5        | <a href="#">113262830</a> | 1.869813098 | 0.902894 | 0.0122   | 0.033081 |
| KLF12        | <a href="#">113251420</a> | 1.868654359 | 0.902    | 0.015318 | 0.040171 |
| CUNH5orf24   | <a href="#">113261749</a> | 1.866359762 | 0.900227 | 0.01543  | 0.040443 |

|              |                           |             |          |          |          |
|--------------|---------------------------|-------------|----------|----------|----------|
| GPAT4        | <a href="#">113245549</a> | 1.865616625 | 0.899653 | 0.017291 | 0.044488 |
| KAT14        | <a href="#">113258316</a> | 1.858519607 | 0.894154 | 0.013113 | 0.03517  |
| MECP2        | <a href="#">113247815</a> | 1.857492399 | 0.893356 | 0.016917 | 0.043683 |
| NR1H2        | <a href="#">113247267</a> | 1.856113472 | 0.892285 | 0.018443 | 0.046962 |
| DCTN4        | <a href="#">113263959</a> | 1.854340684 | 0.890906 | 0.016228 | 0.042192 |
| APC          | <a href="#">113254991</a> | 1.852250506 | 0.889279 | 0.0163   | 0.042346 |
| ARL10        | <a href="#">113264122</a> | 1.84792668  | 0.885908 | 0.019794 | 0.049815 |
| EMC10        | <a href="#">113247286</a> | 1.844282046 | 0.883059 | 0.018355 | 0.046756 |
| AEBP2        | <a href="#">113257831</a> | 1.842836887 | 0.881928 | 0.01871  | 0.047553 |
| LOC113266825 | <a href="#">113266825</a> | 1.839525826 | 0.879334 | 0.014679 | 0.038751 |
| DHPS         | <a href="#">113247138</a> | 1.822705393 | 0.866081 | 0.016935 | 0.04372  |
| ATP13A1      | <a href="#">113256602</a> | -1.77899588 | -0.83106 | 0.015075 | 0.039656 |
| PRR3         | <a href="#">113264368</a> | -1.80018185 | -0.84814 | 0.017022 | 0.043895 |
| UBLCP1       | <a href="#">113264035</a> | -1.80957652 | -0.85565 | 0.019478 | 0.04922  |
| MFAP1        | <a href="#">113241951</a> | -1.8096146  | -0.85568 | 0.019756 | 0.049765 |
| MAT2B        | <a href="#">113264057</a> | -1.81905836 | -0.86319 | 0.019302 | 0.048874 |
| ZBTB33       | <a href="#">113270907</a> | -1.82743154 | -0.86982 | 0.017115 | 0.044119 |
| TATDN2       | <a href="#">113257164</a> | -1.82780274 | -0.87011 | 0.01937  | 0.049001 |
| SSR3         | <a href="#">113254103</a> | -1.83014397 | -0.87196 | 0.019392 | 0.049039 |
| CCNY         | <a href="#">113244222</a> | -1.8313167  | -0.87288 | 0.01939  | 0.049039 |
| LOC113246334 | <a href="#">113246334</a> | -1.83699636 | -0.87735 | 0.017675 | 0.045305 |
| ZMPSTE24     | <a href="#">113268234</a> | -1.8378264  | -0.878   | 0.01363  | 0.036326 |
| CERS4        | <a href="#">113242908</a> | -1.83948807 | -0.8793  | 0.018186 | 0.046388 |
| MPST         | <a href="#">113255974</a> | -1.84077454 | -0.88031 | 0.01853  | 0.047166 |
| HACE1        | <a href="#">113264792</a> | -1.84131973 | -0.88074 | 0.019774 | 0.049776 |
| DDX41        | <a href="#">113264156</a> | -1.84297826 | -0.88204 | 0.017951 | 0.045899 |
| CHORDC1      | <a href="#">113259840</a> | -1.84299347 | -0.88205 | 0.016794 | 0.04339  |
| DIS3         | <a href="#">113251414</a> | -1.85312097 | -0.88996 | 0.018185 | 0.046388 |

|              |                           |             |          |          |          |
|--------------|---------------------------|-------------|----------|----------|----------|
| ATP11C       | <a href="#">113241878</a> | -1.86043083 | -0.89564 | 0.019311 | 0.04889  |
| CDC14B       | <a href="#">113269770</a> | -1.86049049 | -0.89568 | 0.019486 | 0.049232 |
| LOC113269632 | <a href="#">113269632</a> | -1.8613788  | -0.89637 | 0.014216 | 0.037675 |
| VIRMA        | <a href="#">113252924</a> | -1.86151002 | -0.89647 | 0.016045 | 0.041788 |
| KHDRBS1      | <a href="#">113268373</a> | -1.86257033 | -0.89729 | 0.019605 | 0.049485 |
| KRI1         | <a href="#">113242991</a> | -1.86374674 | -0.89821 | 0.018324 | 0.046695 |
| BAZ1B        | <a href="#">113267799</a> | -1.86760675 | -0.90119 | 0.018059 | 0.046115 |
| GTPBP1       | <a href="#">113241769</a> | -1.86981987 | -0.9029  | 0.018192 | 0.046392 |
| RNMT         | <a href="#">113245948</a> | -1.87566055 | -0.9074  | 0.019342 | 0.048949 |
| RETREG2      | <a href="#">113250438</a> | -1.88158278 | -0.91195 | 0.014468 | 0.038268 |
| KDM5B        | <a href="#">113242535</a> | -1.88280261 | -0.91288 | 0.016295 | 0.042342 |
| TBC1D15      | <a href="#">113256262</a> | -1.88403321 | -0.91382 | 0.008698 | 0.02485  |
| TMEM33       | <a href="#">113262442</a> | -1.88420781 | -0.91396 | 0.01019  | 0.028372 |
| ZFC3H1       | <a href="#">113256267</a> | -1.88735128 | -0.91636 | 0.018841 | 0.047834 |
| GPAA1        | <a href="#">113247675</a> | -1.88828899 | -0.91708 | 0.012793 | 0.034476 |
| CNOT3        | <a href="#">113247382</a> | -1.88980028 | -0.91823 | 0.011062 | 0.030388 |
| EHMT2        | <a href="#">113243735</a> | -1.89038913 | -0.91868 | 0.018768 | 0.047674 |
| RTKL1        | <a href="#">113258816</a> | -1.89480048 | -0.92205 | 0.017782 | 0.045527 |
| TMOD3        | <a href="#">113269629</a> | -1.8953402  | -0.92246 | 0.013098 | 0.035148 |
| SRGAP2       | <a href="#">113242467</a> | -1.89546452 | -0.92255 | 0.011456 | 0.031326 |
| RNF4         | <a href="#">113245685</a> | -1.89602302 | -0.92298 | 0.014356 | 0.038001 |
| SUOX         | <a href="#">113256446</a> | -1.89839656 | -0.92478 | 0.013625 | 0.03632  |
| KLHL42       | <a href="#">113257768</a> | -1.90162148 | -0.92723 | 0.016861 | 0.043547 |
| TAF10        | <a href="#">113245819</a> | -1.90177108 | -0.92734 | 0.01768  | 0.045308 |
| TINF2        | <a href="#">113246031</a> | -1.90471966 | -0.92958 | 0.017988 | 0.045969 |
| ERMP1        | <a href="#">113270147</a> | -1.90501963 | -0.92981 | 0.012459 | 0.033652 |
| N4BP2        | <a href="#">113262429</a> | -1.90819801 | -0.93221 | 0.019655 | 0.049573 |
| WDFY1        | <a href="#">113250397</a> | -1.90855464 | -0.93248 | 0.012209 | 0.033098 |

|              |                           |             |          |          |          |
|--------------|---------------------------|-------------|----------|----------|----------|
| JRKL         | <a href="#">113259806</a> | -1.91029109 | -0.93379 | 0.018917 | 0.047998 |
| LOC113246844 | <a href="#">113246844</a> | -1.91067207 | -0.93408 | 0.012476 | 0.033681 |
| TTC14        | <a href="#">113254672</a> | -1.91229447 | -0.9353  | 0.017459 | 0.044828 |
| SNRPD1       | <a href="#">113253272</a> | -1.91335296 | -0.9361  | 0.01648  | 0.042716 |
| ANAPC7       | <a href="#">113266956</a> | -1.91748477 | -0.93922 | 0.007334 | 0.021546 |
| MFSD1        | <a href="#">113254126</a> | -1.91765613 | -0.93934 | 0.011548 | 0.031564 |
| TRAPPC10     | <a href="#">113252526</a> | -1.9181716  | -0.93973 | 0.019099 | 0.048406 |
| EAF1         | <a href="#">113253915</a> | -1.91953859 | -0.94076 | 0.012983 | 0.034933 |
| TMEM68       | <a href="#">113268092</a> | -1.91971271 | -0.94089 | 0.013809 | 0.036732 |
| EXOC2        | <a href="#">113264377</a> | -1.92059231 | -0.94155 | 0.007091 | 0.020953 |
| CPSF3        | <a href="#">113269703</a> | -1.92579851 | -0.94546 | 0.014045 | 0.037316 |
| CORO1B       | <a href="#">113244027</a> | -1.9260377  | -0.94564 | 0.019759 | 0.049765 |
| STT3A        | <a href="#">113259904</a> | -1.92753743 | -0.94676 | 0.015973 | 0.041664 |
| ARFGEF2      | <a href="#">113258693</a> | -1.9291095  | -0.94794 | 0.011761 | 0.032063 |
| RBM19        | <a href="#">113267000</a> | -1.92921967 | -0.94802 | 0.019256 | 0.048787 |
| NUP37        | <a href="#">113256081</a> | -1.93014012 | -0.94871 | 0.018886 | 0.04793  |
| DZIP3        | <a href="#">113250993</a> | -1.93117711 | -0.94948 | 0.011045 | 0.030354 |
| DNAJB11      | <a href="#">113253948</a> | -1.9318114  | -0.94995 | 0.011224 | 0.030777 |
| SMIM15       | <a href="#">113255304</a> | -1.93360404 | -0.95129 | 0.014731 | 0.038865 |
| TGS1         | <a href="#">113268091</a> | -1.93389067 | -0.95151 | 0.018658 | 0.04744  |
| DAGLA        | <a href="#">113246950</a> | -1.93435522 | -0.95185 | 0.01637  | 0.042505 |
| ASXL2        | <a href="#">113270731</a> | -1.93455166 | -0.952   | 0.013358 | 0.035735 |
| NOP56        | <a href="#">113258410</a> | -1.93523931 | -0.95251 | 0.01027  | 0.028566 |
| ADGRG6       | <a href="#">113259504</a> | -1.93619373 | -0.95322 | 0.018563 | 0.047234 |
| LOC113249006 | <a href="#">113249006</a> | -1.93697017 | -0.9538  | 0.012275 | 0.03323  |
| STX2         | <a href="#">113266862</a> | -1.93786241 | -0.95447 | 0.0086   | 0.024619 |
| APPBP2       | <a href="#">113268908</a> | -1.93792072 | -0.95451 | 0.007885 | 0.022931 |
| NELFE        | <a href="#">113243750</a> | -1.93837586 | -0.95485 | 0.010102 | 0.028149 |

|              |                           |             |          |          |          |
|--------------|---------------------------|-------------|----------|----------|----------|
| B3GLCT       | <a href="#">113251234</a> | -1.94063222 | -0.95653 | 0.010064 | 0.028049 |
| SHPK         | <a href="#">113269155</a> | -1.94180898 | -0.9574  | 0.019266 | 0.048803 |
| VPS25        | <a href="#">113265402</a> | -1.94197582 | -0.95753 | 0.014096 | 0.037423 |
| PIAS4        | <a href="#">113242820</a> | -1.94463651 | -0.9595  | 0.0166   | 0.042947 |
| LOC113252430 | <a href="#">113252430</a> | -1.94603539 | -0.96054 | 0.017751 | 0.045462 |
| CUNH9orf78   | <a href="#">113266515</a> | -1.94703488 | -0.96128 | 0.012493 | 0.033719 |
| PSEN1        | <a href="#">113270366</a> | -1.94710204 | -0.96133 | 0.009527 | 0.026811 |
| GXYLT1       | <a href="#">113257488</a> | -1.94713275 | -0.96135 | 0.017443 | 0.044795 |
| NRF1         | <a href="#">113264100</a> | -1.94777069 | -0.96182 | 0.019676 | 0.04961  |
| ANKLE2       | <a href="#">113266836</a> | -1.94796259 | -0.96197 | 0.015009 | 0.039507 |
| VPS4B        | <a href="#">113253497</a> | -1.94880833 | -0.96259 | 0.009972 | 0.027849 |
| TMEM208      | <a href="#">113252358</a> | -1.94916113 | -0.96285 | 0.016558 | 0.042891 |
| LOC113249879 | <a href="#">113249879</a> | -1.94947658 | -0.96309 | 0.016968 | 0.043789 |
| DNAJC3       | <a href="#">113251474</a> | -1.94976088 | -0.9633  | 0.016479 | 0.042716 |
| NKAPD1       | <a href="#">113260051</a> | -1.9501115  | -0.96356 | 0.008911 | 0.025359 |
| PDCD6        | <a href="#">113260771</a> | -1.95220505 | -0.9651  | 0.012967 | 0.034904 |
| DNAJA1       | <a href="#">113260532</a> | -1.95443012 | -0.96675 | 0.013402 | 0.035826 |
| IFT52        | <a href="#">113258621</a> | -1.9551115  | -0.96725 | 0.013725 | 0.036551 |
| COG4         | <a href="#">113252472</a> | -1.95528046 | -0.96738 | 0.008731 | 0.024927 |
| HAUS3        | <a href="#">113245692</a> | -1.95558589 | -0.9676  | 0.016458 | 0.042684 |
| DHX15        | <a href="#">113266749</a> | -1.95731316 | -0.96887 | 0.018359 | 0.046757 |
| CLINT1       | <a href="#">113264026</a> | -1.95735356 | -0.9689  | 0.014919 | 0.039292 |
| TRA2A        | <a href="#">113261451</a> | -1.9574904  | -0.96901 | 0.015924 | 0.04157  |
| GPR146       | <a href="#">113247718</a> | -1.95862167 | -0.96984 | 0.016114 | 0.041936 |
| RAB4B        | <a href="#">113243553</a> | -1.95918781 | -0.97026 | 0.015161 | 0.039853 |
| ATM          | <a href="#">113260096</a> | -1.95983944 | -0.97074 | 0.012899 | 0.03474  |
| NSF          | <a href="#">113265315</a> | -1.96046738 | -0.9712  | 0.006152 | 0.018637 |
| ENOPH1       | <a href="#">113263217</a> | -1.9607183  | -0.97138 | 0.010009 | 0.02793  |

|              |                           |             |          |          |          |
|--------------|---------------------------|-------------|----------|----------|----------|
| TRAPPC2      | <a href="#">113240720</a> | -1.96175078 | -0.97214 | 0.009826 | 0.027521 |
| VHL          | <a href="#">113257162</a> | -1.96197117 | -0.9723  | 0.015073 | 0.039656 |
| XRCC5        | <a href="#">113250485</a> | -1.96247584 | -0.97267 | 0.014154 | 0.037539 |
| PITPNM1      | <a href="#">113244022</a> | -1.96301403 | -0.97307 | 0.015599 | 0.040846 |
| YWHAH        | <a href="#">113245070</a> | -1.96347103 | -0.97341 | 0.009065 | 0.025712 |
| RHOF         | <a href="#">113266940</a> | -1.96478499 | -0.97437 | 0.013188 | 0.035351 |
| MAP3K1       | <a href="#">113255319</a> | -1.96513306 | -0.97463 | 0.010466 | 0.028998 |
| TXNRD1       | <a href="#">113256059</a> | -1.96551393 | -0.97491 | 0.009344 | 0.026379 |
| UGCG         | <a href="#">113260314</a> | -1.97013652 | -0.9783  | 0.014456 | 0.038244 |
| WDR81        | <a href="#">113269127</a> | -1.97025763 | -0.97838 | 0.007185 | 0.02119  |
| KIAA0040     | <a href="#">113262795</a> | -1.97297519 | -0.98037 | 0.014562 | 0.038463 |
| OSMR         | <a href="#">113260912</a> | -1.97307856 | -0.98045 | 0.017433 | 0.044776 |
| TMEM214      | <a href="#">113270931</a> | -1.97350822 | -0.98076 | 0.008626 | 0.024676 |
| BCAP29       | <a href="#">113258566</a> | -1.97468243 | -0.98162 | 0.007753 | 0.022594 |
| AAAS         | <a href="#">113257557</a> | -1.97625154 | -0.98277 | 0.010544 | 0.029191 |
| GABPB1       | <a href="#">113269609</a> | -1.97688005 | -0.98323 | 0.015376 | 0.040317 |
| LOC113246295 | <a href="#">113246295</a> | -1.97698818 | -0.9833  | 0.009956 | 0.027812 |
| VMP1         | <a href="#">113268893</a> | -1.97792544 | -0.98399 | 0.009835 | 0.027536 |
| CCDC88A      | <a href="#">113245543</a> | -1.97820932 | -0.9842  | 0.012664 | 0.034149 |
| CUNH20orf27  | <a href="#">113258390</a> | -1.97924023 | -0.98495 | 0.015127 | 0.039779 |
| LRRC14       | <a href="#">113247678</a> | -1.97955056 | -0.98517 | 0.009764 | 0.027382 |
| AGPS         | <a href="#">113250728</a> | -1.98021403 | -0.98566 | 0.013391 | 0.03581  |
| RBM15B       | <a href="#">113256925</a> | -1.98128998 | -0.98644 | 0.00795  | 0.02308  |
| HLTF         | <a href="#">113254041</a> | -1.98157761 | -0.98665 | 0.007809 | 0.02275  |
| CHTF8        | <a href="#">113252418</a> | -1.98174311 | -0.98677 | 0.008029 | 0.02328  |
| SH3GL1       | <a href="#">113242831</a> | -1.98247834 | -0.98731 | 0.01473  | 0.038865 |
| SNX27        | <a href="#">113246219</a> | -1.98249739 | -0.98732 | 0.012088 | 0.032816 |
| HMG20B       | <a href="#">113242805</a> | -1.98329729 | -0.9879  | 0.009477 | 0.026705 |

|              |                           |             |          |          |          |
|--------------|---------------------------|-------------|----------|----------|----------|
| TMEM165      | <a href="#">113262510</a> | -1.9836607  | -0.98817 | 0.008109 | 0.023466 |
| ORC2         | <a href="#">113250599</a> | -1.98373033 | -0.98822 | 0.011519 | 0.031491 |
| TRANK1       | <a href="#">113253767</a> | -1.9846244  | -0.98887 | 0.014657 | 0.0387   |
| FBXO38       | <a href="#">113263924</a> | -1.98545253 | -0.98947 | 0.010408 | 0.028873 |
| KMT5A        | <a href="#">113266900</a> | -1.98653649 | -0.99026 | 0.006286 | 0.018963 |
| SCAMP2       | <a href="#">113240978</a> | -1.98777564 | -0.99115 | 0.007754 | 0.022594 |
| MYDGF        | <a href="#">113242846</a> | -1.99162482 | -0.99395 | 0.01195  | 0.032532 |
| GLYR1        | <a href="#">113270832</a> | -1.99358461 | -0.99536 | 0.012223 | 0.033122 |
| ENTPD1       | <a href="#">113251758</a> | -1.9938131  | -0.99553 | 0.015997 | 0.041703 |
| U2AF1        | <a href="#">113253956</a> | -1.99515903 | -0.9965  | 0.009104 | 0.025807 |
| GTF2H3       | <a href="#">113266889</a> | -1.99653179 | -0.9975  | 0.006189 | 0.018724 |
| ARF6         | <a href="#">113266201</a> | -1.99824188 | -0.99873 | 0.009671 | 0.02716  |
| LOC113270621 | <a href="#">113270621</a> | -1.99887058 | -0.99919 | 0.015865 | 0.041463 |
| PIKFYVE      | <a href="#">113250516</a> | -1.99918803 | -0.99941 | 0.015137 | 0.039798 |
| RAB43        | <a href="#">113257245</a> | -2.00069318 | -1.0005  | 0.012411 | 0.033549 |
| PMF1         | <a href="#">113245243</a> | -2.00081411 | -1.00059 | 0.01093  | 0.030074 |
| MOSPD2       | <a href="#">113240710</a> | -2.001967   | -1.00142 | 0.01073  | 0.029603 |
| NAGPA        | <a href="#">113270828</a> | -2.00280644 | -1.00202 | 0.0131   | 0.035148 |
| FOPNL        | <a href="#">113270759</a> | -2.00310252 | -1.00224 | 0.010601 | 0.029313 |
| GALK2        | <a href="#">113269599</a> | -2.00415579 | -1.00299 | 0.009714 | 0.027247 |
| DCTN5        | <a href="#">113267581</a> | -2.00673592 | -1.00485 | 0.005873 | 0.017917 |
| TMEM106A     | <a href="#">113265382</a> | -2.00810517 | -1.00583 | 0.014138 | 0.037506 |
| PRKAB1       | <a href="#">113267029</a> | -2.00859483 | -1.00619 | 0.015482 | 0.040555 |
| HIP1R        | <a href="#">113266911</a> | -2.00885003 | -1.00637 | 0.016581 | 0.042924 |
| RABGAP1L     | <a href="#">113262797</a> | -2.01000124 | -1.0072  | 0.008072 | 0.023378 |
| SMARCA4      | <a href="#">113243008</a> | -2.01039976 | -1.00748 | 0.008779 | 0.025038 |
| IKBKG        | <a href="#">113247832</a> | -2.01144632 | -1.00823 | 0.014095 | 0.037423 |
| NUP188       | <a href="#">113266493</a> | -2.01251129 | -1.009   | 0.005809 | 0.017742 |

|              |                           |             |          |          |          |
|--------------|---------------------------|-------------|----------|----------|----------|
| LRRK1        | <a href="#">113263631</a> | -2.01486122 | -1.01068 | 0.008019 | 0.023262 |
| LOC113246280 | <a href="#">113246280</a> | -2.01694515 | -1.01217 | 0.015879 | 0.041481 |
| SLC8B1       | <a href="#">113266994</a> | -2.01715103 | -1.01232 | 0.006813 | 0.020246 |
| ALDH9A1      | <a href="#">113268692</a> | -2.01717514 | -1.01234 | 0.011399 | 0.031195 |
| ENPP4        | <a href="#">113261238</a> | -2.01792671 | -1.01287 | 0.010249 | 0.028524 |
| LRPAP1       | <a href="#">113245731</a> | -2.02172954 | -1.01559 | 0.011088 | 0.030448 |
| RHBDD1       | <a href="#">113250388</a> | -2.02372151 | -1.01701 | 0.010917 | 0.03005  |
| PI4KA        | <a href="#">113247022</a> | -2.02373783 | -1.01702 | 0.015069 | 0.039656 |
| HSD17B11     | <a href="#">113263170</a> | -2.0256874  | -1.01841 | 0.006236 | 0.01884  |
| POMK         | <a href="#">113245578</a> | -2.02787134 | -1.01997 | 0.01407  | 0.037369 |
| PGS1         | <a href="#">113244672</a> | -2.02912976 | -1.02086 | 0.008568 | 0.024539 |
| ATG7         | <a href="#">113257175</a> | -2.03198647 | -1.02289 | 0.006408 | 0.019262 |
| CDYL         | <a href="#">113264414</a> | -2.03247278 | -1.02324 | 0.006772 | 0.020144 |
| SLC30A5      | <a href="#">113255261</a> | -2.03307389 | -1.02366 | 0.007019 | 0.020764 |
| KLHL8        | <a href="#">113263172</a> | -2.03375694 | -1.02415 | 0.004889 | 0.015282 |
| TMEM183A     | <a href="#">113242528</a> | -2.03519881 | -1.02517 | 0.005248 | 0.016251 |
| NMRAL1       | <a href="#">113270846</a> | -2.03647683 | -1.02608 | 0.008418 | 0.024176 |
| AGRN         | <a href="#">113270653</a> | -2.03898208 | -1.02785 | 0.005885 | 0.017944 |
| SUMF2        | <a href="#">113267740</a> | -2.03919002 | -1.028   | 0.017384 | 0.04468  |
| IFT80        | <a href="#">113254134</a> | -2.03968216 | -1.02834 | 0.012259 | 0.0332   |
| PLOD3        | <a href="#">113267834</a> | -2.04039163 | -1.02885 | 0.012746 | 0.034361 |
| PAXIP1       | <a href="#">113241515</a> | -2.04112707 | -1.02937 | 0.014885 | 0.039219 |
| HEATR5A      | <a href="#">113266100</a> | -2.0416193  | -1.02971 | 0.006865 | 0.020366 |
| ZNF646       | <a href="#">113267713</a> | -2.04171083 | -1.02978 | 0.008993 | 0.025545 |
| RASA2        | <a href="#">113254007</a> | -2.04822819 | -1.03438 | 0.005925 | 0.018045 |
| PKN1         | <a href="#">113247145</a> | -2.04940002 | -1.0352  | 0.007661 | 0.022362 |
| PHF20L1      | <a href="#">113252706</a> | -2.05015545 | -1.03573 | 0.008303 | 0.023896 |
| LUC7L        | <a href="#">113245359</a> | -2.05023843 | -1.03579 | 0.008204 | 0.023651 |

|              |                           |             |          |          |          |
|--------------|---------------------------|-------------|----------|----------|----------|
| HERC4        | <a href="#">113259104</a> | -2.05199222 | -1.03703 | 0.005591 | 0.017139 |
| TRIM56       | <a href="#">113267840</a> | -2.05481102 | -1.03901 | 0.00886  | 0.025249 |
| THOC3        | <a href="#">113264118</a> | -2.05735147 | -1.04079 | 0.013899 | 0.036949 |
| SERTAD2      | <a href="#">113244895</a> | -2.05749367 | -1.04089 | 0.011181 | 0.030679 |
| ALYREF       | <a href="#">113244498</a> | -2.05806758 | -1.04129 | 0.010231 | 0.02848  |
| PLXNB2       | <a href="#">113241610</a> | -2.05946342 | -1.04227 | 0.010267 | 0.028562 |
| BRD3         | <a href="#">113266580</a> | -2.05961906 | -1.04238 | 0.009429 | 0.026584 |
| SLC38A6      | <a href="#">113242406</a> | -2.06038385 | -1.04291 | 0.018945 | 0.048062 |
| DPAGT1       | <a href="#">113259971</a> | -2.06084959 | -1.04324 | 0.007199 | 0.021223 |
| FAM204A      | <a href="#">113251985</a> | -2.06144614 | -1.04366 | 0.004206 | 0.013378 |
| HNRNPC       | <a href="#">113248475</a> | -2.0619695  | -1.04402 | 0.014334 | 0.03795  |
| PRKD3        | <a href="#">113241389</a> | -2.06232575 | -1.04427 | 0.006541 | 0.019609 |
| DYNLT1       | <a href="#">113259604</a> | -2.06274224 | -1.04456 | 0.005931 | 0.018054 |
| TMEM123      | <a href="#">113260141</a> | -2.06274602 | -1.04457 | 0.007459 | 0.021856 |
| SMARCD2      | <a href="#">113265284</a> | -2.06382986 | -1.04532 | 0.005126 | 0.015935 |
| RAB8B        | <a href="#">113240830</a> | -2.06556621 | -1.04654 | 0.011684 | 0.03189  |
| EIF2AK2      | <a href="#">113241346</a> | -2.06603659 | -1.04687 | 0.005999 | 0.018233 |
| TGOLN2       | <a href="#">113243219</a> | -2.06607143 | -1.04689 | 0.019838 | 0.049888 |
| SH3GLB2      | <a href="#">113266495</a> | -2.07030098 | -1.04984 | 0.007004 | 0.020727 |
| ATP6V1H      | <a href="#">113268102</a> | -2.07101933 | -1.05034 | 0.004514 | 0.014224 |
| SNAP23       | <a href="#">113241986</a> | -2.07159617 | -1.05074 | 0.006744 | 0.020098 |
| SNRPA        | <a href="#">113243557</a> | -2.07197095 | -1.051   | 0.009448 | 0.026634 |
| TBCD         | <a href="#">113244459</a> | -2.07248511 | -1.05136 | 0.005748 | 0.017565 |
| CD2AP        | <a href="#">113261223</a> | -2.0731208  | -1.0518  | 0.006767 | 0.020136 |
| LOC113264906 | <a href="#">113264906</a> | -2.07362464 | -1.05215 | 0.005523 | 0.016979 |
| PPP1R10      | <a href="#">113264363</a> | -2.0739922  | -1.05241 | 0.004169 | 0.013281 |
| FEM1C        | <a href="#">113261602</a> | -2.07499016 | -1.0531  | 0.017136 | 0.044156 |
| PLAGL1       | <a href="#">113259514</a> | -2.07596598 | -1.05378 | 0.013745 | 0.036582 |

|              |                           |             |          |          |          |
|--------------|---------------------------|-------------|----------|----------|----------|
| NUP98        | <a href="#">113269254</a> | -2.07808034 | -1.05525 | 0.017823 | 0.045606 |
| SELENOI      | <a href="#">113270840</a> | -2.0790996  | -1.05596 | 0.007339 | 0.021556 |
| LOC113248325 | <a href="#">113248325</a> | -2.08041594 | -1.05687 | 0.017018 | 0.043894 |
| SEPT9        | <a href="#">113244579</a> | -2.08122264 | -1.05743 | 0.019622 | 0.049519 |
| TNRC18       | <a href="#">113267529</a> | -2.0824096  | -1.05825 | 0.014168 | 0.037562 |
| SS18         | <a href="#">113253303</a> | -2.0841149  | -1.05943 | 0.00622  | 0.01881  |
| PLD3         | <a href="#">113243570</a> | -2.08426036 | -1.05954 | 0.010784 | 0.029715 |
| CUNH14orf119 | <a href="#">113246018</a> | -2.08434256 | -1.05959 | 0.010393 | 0.028859 |
| LOC113248842 | <a href="#">113248842</a> | -2.08483109 | -1.05993 | 0.007256 | 0.021354 |
| UST          | <a href="#">113259539</a> | -2.08591786 | -1.06068 | 0.009589 | 0.026969 |
| DCP2         | <a href="#">113254985</a> | -2.09043276 | -1.0638  | 0.01255  | 0.033867 |
| NUP93        | <a href="#">113252267</a> | -2.0906358  | -1.06394 | 0.00384  | 0.012379 |
| SLC7A8       | <a href="#">113246015</a> | -2.09163379 | -1.06463 | 0.004708 | 0.014791 |
| NPL          | <a href="#">113262728</a> | -2.09287515 | -1.06549 | 0.019771 | 0.049776 |
| CWF19L1      | <a href="#">113251824</a> | -2.09292561 | -1.06552 | 0.013045 | 0.035057 |
| SLC27A4      | <a href="#">113266465</a> | -2.0949574  | -1.06692 | 0.005607 | 0.017186 |
| RPS6KA4      | <a href="#">113244169</a> | -2.09522761 | -1.06711 | 0.002796 | 0.009427 |
| ABI1         | <a href="#">113248690</a> | -2.09578098 | -1.06749 | 0.004192 | 0.013341 |
| TCF3         | <a href="#">113242743</a> | -2.09606397 | -1.06768 | 0.006751 | 0.020108 |
| CDK4         | <a href="#">113256363</a> | -2.09821934 | -1.06917 | 0.005034 | 0.01568  |
| VRK3         | <a href="#">113243270</a> | -2.09842469 | -1.06931 | 0.005446 | 0.016774 |
| TXNDC12      | <a href="#">113254678</a> | -2.09853137 | -1.06938 | 0.002987 | 0.009989 |
| TRIM8        | <a href="#">113251875</a> | -2.09943601 | -1.07    | 0.006683 | 0.019944 |
| RGS7BP       | <a href="#">113255291</a> | -2.10112559 | -1.07116 | 0.017703 | 0.045359 |
| CHST12       | <a href="#">113247737</a> | -2.10124283 | -1.07124 | 0.00968  | 0.027169 |
| INTS9        | <a href="#">113269938</a> | -2.10210064 | -1.07183 | 0.007225 | 0.021284 |
| LFNG         | <a href="#">113247705</a> | -2.10305208 | -1.07248 | 0.007926 | 0.023027 |
| WASHC5       | <a href="#">113252736</a> | -2.10504223 | -1.07385 | 0.003536 | 0.011542 |

|              |                           |             |          |          |          |
|--------------|---------------------------|-------------|----------|----------|----------|
| SIGMAR1      | <a href="#">113260503</a> | -2.10522631 | -1.07398 | 0.007244 | 0.021327 |
| TTC9C        | <a href="#">113246971</a> | -2.10549835 | -1.07416 | 0.008834 | 0.025184 |
| HIRIP3       | <a href="#">113267655</a> | -2.10633229 | -1.07473 | 0.010027 | 0.027958 |
| CRAMP1       | <a href="#">113245085</a> | -2.10645274 | -1.07482 | 0.009087 | 0.025771 |
| PTPN9        | <a href="#">113240994</a> | -2.10645472 | -1.07482 | 0.009336 | 0.026366 |
| PRKX         | <a href="#">113240773</a> | -2.10646383 | -1.07482 | 0.003457 | 0.011319 |
| LSM7         | <a href="#">113242763</a> | -2.10692565 | -1.07514 | 0.015876 | 0.041481 |
| AP1M1        | <a href="#">113256644</a> | -2.10726424 | -1.07537 | 0.00357  | 0.011638 |
| MAP4K2       | <a href="#">113244157</a> | -2.10921244 | -1.0767  | 0.008919 | 0.02537  |
| SHC1         | <a href="#">113245295</a> | -2.10955545 | -1.07694 | 0.016014 | 0.041733 |
| NUDCD1       | <a href="#">113252816</a> | -2.10960635 | -1.07697 | 0.005666 | 0.017349 |
| IP6K1        | <a href="#">113256884</a> | -2.11309757 | -1.07936 | 0.005189 | 0.016101 |
| CEP162       | <a href="#">113261056</a> | -2.11328025 | -1.07948 | 0.019753 | 0.049765 |
| CDK19        | <a href="#">113264736</a> | -2.11401788 | -1.07999 | 0.005887 | 0.017944 |
| HELZ2        | <a href="#">113258813</a> | -2.1180902  | -1.08276 | 0.007392 | 0.021698 |
| GANAB        | <a href="#">113246965</a> | -2.11822871 | -1.08286 | 0.010533 | 0.029166 |
| ZNF518A      | <a href="#">113251764</a> | -2.12066966 | -1.08452 | 0.007818 | 0.022766 |
| WSB1         | <a href="#">113269014</a> | -2.12175986 | -1.08526 | 0.011119 | 0.030521 |
| LOC113268043 | <a href="#">113268043</a> | -2.12299105 | -1.0861  | 0.003267 | 0.010759 |
| NCLN         | <a href="#">113242776</a> | -2.1230355  | -1.08613 | 0.003239 | 0.010681 |
| TAPBP        | <a href="#">113243801</a> | -2.12333213 | -1.08633 | 0.005016 | 0.015636 |
| RELL1        | <a href="#">113262399</a> | -2.12514389 | -1.08756 | 0.004231 | 0.013447 |
| C2CD3        | <a href="#">113269304</a> | -2.12521407 | -1.08761 | 0.00505  | 0.015726 |
| LOC113246305 | <a href="#">113246305</a> | -2.12736939 | -1.08907 | 0.006691 | 0.019962 |
| WASF2        | <a href="#">113268437</a> | -2.12765145 | -1.08926 | 0.014166 | 0.037562 |
| WASHC1       | <a href="#">113258027</a> | -2.12920278 | -1.09031 | 0.004619 | 0.01453  |
| OGFRL1       | <a href="#">113261127</a> | -2.1300979  | -1.09092 | 0.00276  | 0.009321 |
| PTPN1        | <a href="#">113258718</a> | -2.13161624 | -1.09195 | 0.006833 | 0.020284 |

|              |                           |             |          |          |          |
|--------------|---------------------------|-------------|----------|----------|----------|
| AIDA         | <a href="#">113268703</a> | -2.1330516  | -1.09292 | 0.008885 | 0.025309 |
| KDM1B        | <a href="#">113264506</a> | -2.13375142 | -1.09339 | 0.008775 | 0.025034 |
| CBFB         | <a href="#">113252342</a> | -2.13583392 | -1.0948  | 0.007907 | 0.02298  |
| PBRM1        | <a href="#">113256958</a> | -2.13585037 | -1.09481 | 0.007119 | 0.021017 |
| STAT5A       | <a href="#">113265423</a> | -2.13697181 | -1.09557 | 0.00367  | 0.011899 |
| RANBP1       | <a href="#">113245918</a> | -2.1378855  | -1.09618 | 0.004492 | 0.014172 |
| WRAP53       | <a href="#">113271147</a> | -2.13850793 | -1.0966  | 0.012269 | 0.033222 |
| THADA        | <a href="#">113246384</a> | -2.13975624 | -1.09745 | 0.00385  | 0.012393 |
| CHSY1        | <a href="#">113263628</a> | -2.14004028 | -1.09764 | 0.005228 | 0.016207 |
| RBM14        | <a href="#">113244054</a> | -2.14066195 | -1.09806 | 0.007614 | 0.022262 |
| PSD3         | <a href="#">113245558</a> | -2.14335739 | -1.09987 | 0.00539  | 0.01663  |
| TMX4         | <a href="#">113258348</a> | -2.14335894 | -1.09987 | 0.00656  | 0.019649 |
| CPQ          | <a href="#">113252904</a> | -2.14421039 | -1.10045 | 0.006761 | 0.020122 |
| CAND1        | <a href="#">113256307</a> | -2.14483717 | -1.10087 | 0.003649 | 0.01185  |
| CELF2        | <a href="#">113241055</a> | -2.14638275 | -1.10191 | 0.00302  | 0.010069 |
| RBBP5        | <a href="#">113242494</a> | -2.14940104 | -1.10393 | 0.008487 | 0.024334 |
| TET2         | <a href="#">113255522</a> | -2.14950353 | -1.104   | 0.010431 | 0.02893  |
| PACS1        | <a href="#">113244077</a> | -2.1498984  | -1.10427 | 0.00274  | 0.009257 |
| OSBPL10      | <a href="#">113253845</a> | -2.15075544 | -1.10484 | 0.015414 | 0.040409 |
| CNIH4        | <a href="#">113262906</a> | -2.15347125 | -1.10666 | 0.006929 | 0.020526 |
| CCDC77       | <a href="#">113258032</a> | -2.15379681 | -1.10688 | 0.010401 | 0.028859 |
| LOC113259854 | <a href="#">113259854</a> | -2.15410777 | -1.10709 | 0.00688  | 0.020393 |
| PXMP4        | <a href="#">113258499</a> | -2.15493263 | -1.10764 | 0.011339 | 0.031049 |
| TLL5         | <a href="#">113270310</a> | -2.15601919 | -1.10837 | 0.005475 | 0.01685  |
| PHF8         | <a href="#">113247534</a> | -2.15609949 | -1.10842 | 0.008179 | 0.02361  |
| BTD          | <a href="#">113253913</a> | -2.15672936 | -1.10885 | 0.003266 | 0.010759 |
| CHD1         | <a href="#">113255048</a> | -2.15689588 | -1.10896 | 0.011112 | 0.030508 |
| SMAGP        | <a href="#">113257611</a> | -2.15735978 | -1.10927 | 0.009701 | 0.027222 |

|              |                           |             |          |          |          |
|--------------|---------------------------|-------------|----------|----------|----------|
| RBM10        | <a href="#">113265967</a> | -2.15775511 | -1.10953 | 0.00462  | 0.014532 |
| LIMS1        | <a href="#">113267768</a> | -2.15817921 | -1.10981 | 0.019051 | 0.048304 |
| TRPM6        | <a href="#">113269845</a> | -2.1582415  | -1.10986 | 0.012025 | 0.032683 |
| STRBP        | <a href="#">113266383</a> | -2.1585214  | -1.11004 | 0.00485  | 0.015177 |
| BRPF3        | <a href="#">113243856</a> | -2.15954968 | -1.11073 | 0.008983 | 0.025525 |
| LOC113248305 | <a href="#">113248305</a> | -2.15958756 | -1.11076 | 0.013547 | 0.036135 |
| FAM20B       | <a href="#">113262775</a> | -2.16038723 | -1.11129 | 0.003533 | 0.011536 |
| BTAF1        | <a href="#">113243164</a> | -2.16057085 | -1.11141 | 0.006211 | 0.018785 |
| CHST3        | <a href="#">113259154</a> | -2.16312007 | -1.11311 | 0.011309 | 0.030974 |
| VPS35L       | <a href="#">113270732</a> | -2.16366531 | -1.11348 | 0.001592 | 0.005785 |
| LOC113255248 | <a href="#">113255248</a> | -2.16388739 | -1.11363 | 0.015206 | 0.039941 |
| PTGER4       | <a href="#">113260927</a> | -2.16505137 | -1.1144  | 0.003482 | 0.011387 |
| TAF5         | <a href="#">113251886</a> | -2.16520161 | -1.1145  | 0.01495  | 0.039366 |
| TLK1         | <a href="#">113250784</a> | -2.16737419 | -1.11595 | 0.005089 | 0.015841 |
| SLC25A51     | <a href="#">113260437</a> | -2.16810138 | -1.11643 | 0.004441 | 0.014021 |
| PTDSS1       | <a href="#">113252906</a> | -2.16862285 | -1.11678 | 0.006538 | 0.019604 |
| TERF1        | <a href="#">113253053</a> | -2.1699867  | -1.11769 | 0.002955 | 0.009892 |
| VPS16        | <a href="#">113258406</a> | -2.17314307 | -1.11978 | 0.00185  | 0.006572 |
| NSG1         | <a href="#">113266669</a> | -2.17474364 | -1.12085 | 0.01101  | 0.030276 |
| GLIPR1       | <a href="#">113256250</a> | -2.17511699 | -1.12109 | 0.01107  | 0.030404 |
| FMNL3        | <a href="#">113257643</a> | -2.1761376  | -1.12177 | 0.017551 | 0.045036 |
| GATAD2A      | <a href="#">113256754</a> | -2.17618253 | -1.1218  | 0.001922 | 0.006789 |
| TWF1         | <a href="#">113257715</a> | -2.17656966 | -1.12206 | 0.010465 | 0.028998 |
| SLC35A5      | <a href="#">113251304</a> | -2.17847684 | -1.12332 | 0.002867 | 0.009619 |
| BOD1L1       | <a href="#">113266685</a> | -2.17881324 | -1.12354 | 0.010552 | 0.029196 |
| NUP107       | <a href="#">113256298</a> | -2.17885122 | -1.12357 | 0.004288 | 0.0136   |
| FGL2         | <a href="#">113259042</a> | -2.17913613 | -1.12376 | 0.009661 | 0.02715  |
| WDR1         | <a href="#">113266678</a> | -2.17978312 | -1.12418 | 0.018348 | 0.046746 |

|              |                           |             |          |          |          |
|--------------|---------------------------|-------------|----------|----------|----------|
| CHD1L        | <a href="#">113247760</a> | -2.17988162 | -1.12425 | 0.003259 | 0.010738 |
| ARHGEF18     | <a href="#">113242936</a> | -2.18133477 | -1.12521 | 0.006354 | 0.019128 |
| OSTC         | <a href="#">113255549</a> | -2.18170587 | -1.12546 | 0.003005 | 0.010028 |
| PDZD8        | <a href="#">113251975</a> | -2.18240502 | -1.12592 | 0.003136 | 0.010394 |
| REXO2        | <a href="#">113260032</a> | -2.18339043 | -1.12657 | 0.003849 | 0.012393 |
| FBXO33       | <a href="#">113266159</a> | -2.18478714 | -1.12749 | 0.008927 | 0.025386 |
| DAP          | <a href="#">113260820</a> | -2.18568224 | -1.12808 | 0.006347 | 0.019116 |
| LOC113261754 | <a href="#">113261754</a> | -2.18604109 | -1.12832 | 0.010685 | 0.029508 |
| SRRT         | <a href="#">113267842</a> | -2.18613513 | -1.12838 | 0.005491 | 0.016896 |
| TMSB15B      | <a href="#">113247226</a> | -2.18622159 | -1.12844 | 0.008892 | 0.025322 |
| RNF114       | <a href="#">113258707</a> | -2.18755881 | -1.12932 | 0.002339 | 0.008064 |
| NFYA         | <a href="#">113261320</a> | -2.18789106 | -1.12954 | 0.002707 | 0.009165 |
| WRAP73       | <a href="#">113270592</a> | -2.19019129 | -1.13106 | 0.006136 | 0.018593 |
| PIGM         | <a href="#">113246643</a> | -2.19072928 | -1.13141 | 0.015831 | 0.041381 |
| LOC113241577 | <a href="#">113241577</a> | -2.19142143 | -1.13187 | 0.016064 | 0.041813 |
| MSL2         | <a href="#">113253965</a> | -2.19212275 | -1.13233 | 0.002953 | 0.009888 |
| RNF145       | <a href="#">113264034</a> | -2.1930055  | -1.13291 | 0.002549 | 0.008693 |
| STAT6        | <a href="#">113256394</a> | -2.19515218 | -1.13432 | 0.003596 | 0.011712 |
| ALG11        | <a href="#">113251292</a> | -2.19537786 | -1.13447 | 0.004089 | 0.013053 |
| CCAR1        | <a href="#">113259115</a> | -2.19646351 | -1.13518 | 0.006285 | 0.018963 |
| SREBF2       | <a href="#">113241715</a> | -2.19650195 | -1.13521 | 0.006802 | 0.020219 |
| SH2B2        | <a href="#">113267828</a> | -2.19717616 | -1.13565 | 0.019598 | 0.049485 |
| CNPY2        | <a href="#">113256424</a> | -2.19756683 | -1.13591 | 0.004825 | 0.015118 |
| NIPAL3       | <a href="#">113268500</a> | -2.1976577  | -1.13597 | 0.006876 | 0.02039  |
| ANTXR2       | <a href="#">113263231</a> | -2.19863171 | -1.13661 | 0.004993 | 0.01557  |
| SLC43A2      | <a href="#">113269118</a> | -2.19899077 | -1.13684 | 0.005239 | 0.016228 |
| EVL          | <a href="#">113267273</a> | -2.19910085 | -1.13691 | 0.010023 | 0.027955 |
| RPIA         | <a href="#">113242784</a> | -2.20094292 | -1.13812 | 0.005563 | 0.017069 |

|          |                           |             |          |          |          |
|----------|---------------------------|-------------|----------|----------|----------|
| HEATR5B  | <a href="#">113241303</a> | -2.201003   | -1.13816 | 0.005515 | 0.016962 |
| SPTSSA   | <a href="#">113266116</a> | -2.20242861 | -1.1391  | 0.002017 | 0.007084 |
| ATP6VOD1 | <a href="#">113252366</a> | -2.20332995 | -1.13969 | 0.002575 | 0.008764 |
| PIP4K2C  | <a href="#">113256375</a> | -2.20370184 | -1.13993 | 0.002673 | 0.009058 |
| SNRNP40  | <a href="#">113268389</a> | -2.20592073 | -1.14138 | 0.005512 | 0.016955 |
| CCND2    | <a href="#">113258003</a> | -2.20662388 | -1.14184 | 0.00814  | 0.023528 |
| GABPB2   | <a href="#">113246129</a> | -2.20677837 | -1.14194 | 0.01725  | 0.044398 |
| FITM2    | <a href="#">113258631</a> | -2.20695729 | -1.14206 | 0.003686 | 0.011941 |
| SUPT20H  | <a href="#">113251262</a> | -2.20935903 | -1.14363 | 0.004172 | 0.013285 |
| CLHC1    | <a href="#">113245595</a> | -2.21044829 | -1.14434 | 0.013699 | 0.036498 |
| DHX9     | <a href="#">113262730</a> | -2.21087982 | -1.14462 | 0.003708 | 0.012006 |
| SF3B3    | <a href="#">113252470</a> | -2.21155096 | -1.14506 | 0.008002 | 0.023228 |
| AMMECR1L | <a href="#">113263495</a> | -2.21253902 | -1.1457  | 0.003004 | 0.010028 |
| LIN9     | <a href="#">113262924</a> | -2.21254072 | -1.1457  | 0.01119  | 0.030691 |
| MSL1     | <a href="#">113265497</a> | -2.21262145 | -1.14576 | 0.00494  | 0.015424 |
| EIF2AK3  | <a href="#">113242804</a> | -2.21263127 | -1.14576 | 0.001972 | 0.006948 |
| IPMK     | <a href="#">113259062</a> | -2.21300716 | -1.14601 | 0.015443 | 0.040469 |
| S100PBP  | <a href="#">113268341</a> | -2.21497651 | -1.14729 | 0.004501 | 0.014193 |
| SURF4    | <a href="#">113266566</a> | -2.21598869 | -1.14795 | 0.006718 | 0.020033 |
| SMPD4    | <a href="#">113245964</a> | -2.21653156 | -1.1483  | 0.002799 | 0.009436 |
| SMC5     | <a href="#">113270208</a> | -2.21787047 | -1.14918 | 0.005007 | 0.01561  |
| TIAM2    | <a href="#">113259585</a> | -2.22026752 | -1.15073 | 0.011743 | 0.032028 |
| SLC9A9   | <a href="#">113254028</a> | -2.22067743 | -1.151   | 0.005527 | 0.016982 |
| NUMB     | <a href="#">113270364</a> | -2.22331344 | -1.15271 | 0.001345 | 0.004994 |
| CREG1    | <a href="#">113262883</a> | -2.2252514  | -1.15397 | 0.014326 | 0.037937 |
| RASA3    | <a href="#">113247558</a> | -2.22529906 | -1.154   | 0.012408 | 0.033549 |
| CNNM4    | <a href="#">113246616</a> | -2.22537401 | -1.15405 | 0.003016 | 0.01006  |
| ADCK5    | <a href="#">113247605</a> | -2.22560385 | -1.1542  | 0.00282  | 0.009489 |

|              |                           |             |          |          |          |
|--------------|---------------------------|-------------|----------|----------|----------|
| SLC11A2      | <a href="#">113257616</a> | -2.22604881 | -1.15449 | 0.006081 | 0.018439 |
| CFD          | <a href="#">113242706</a> | -2.22639523 | -1.15471 | 0.00282  | 0.009489 |
| ISY1         | <a href="#">113257244</a> | -2.22748166 | -1.15541 | 0.002494 | 0.008523 |
| FLI1         | <a href="#">113259871</a> | -2.22783915 | -1.15565 | 0.004943 | 0.015427 |
| DDOST        | <a href="#">113268561</a> | -2.22792762 | -1.1557  | 0.015183 | 0.039894 |
| ABCD3        | <a href="#">113254387</a> | -2.23006734 | -1.15709 | 0.002404 | 0.008252 |
| SLC16A3      | <a href="#">113244477</a> | -2.23132564 | -1.1579  | 0.013248 | 0.03547  |
| FCHSD1       | <a href="#">113255372</a> | -2.23363579 | -1.15939 | 0.004796 | 0.015031 |
| LRMDA        | <a href="#">113258872</a> | -2.23466201 | -1.16006 | 0.015632 | 0.040916 |
| MCCC1        | <a href="#">113254564</a> | -2.23809333 | -1.16227 | 0.006421 | 0.019298 |
| COMMD6       | <a href="#">113251423</a> | -2.23851456 | -1.16254 | 0.008303 | 0.023896 |
| SLCO2B1      | <a href="#">113269323</a> | -2.23903257 | -1.16288 | 0.004319 | 0.013678 |
| HCFC1        | <a href="#">113247827</a> | -2.23979955 | -1.16337 | 0.009385 | 0.026473 |
| IRF9         | <a href="#">113245987</a> | -2.24054332 | -1.16385 | 0.003062 | 0.010183 |
| COPG2        | <a href="#">113264252</a> | -2.2406071  | -1.16389 | 0.002    | 0.007034 |
| UBA7         | <a href="#">113256887</a> | -2.24315476 | -1.16553 | 0.002299 | 0.007948 |
| TRAFD1       | <a href="#">113266979</a> | -2.24511533 | -1.16679 | 0.001689 | 0.006077 |
| LOC113264918 | <a href="#">113264918</a> | -2.24522771 | -1.16686 | 0.00608  | 0.018438 |
| SLC46A3      | <a href="#">113251217</a> | -2.24582686 | -1.16725 | 0.007135 | 0.021057 |
| RSAD2        | <a href="#">113269410</a> | -2.24598502 | -1.16735 | 0.006755 | 0.020113 |
| EXOSC2       | <a href="#">113266524</a> | -2.24716535 | -1.16811 | 0.00835  | 0.024011 |
| DONSON       | <a href="#">113263956</a> | -2.24848183 | -1.16895 | 0.003005 | 0.010028 |
| ZFAND2A      | <a href="#">113247742</a> | -2.24849536 | -1.16896 | 0.006086 | 0.018449 |
| MUTYH        | <a href="#">113254745</a> | -2.24890584 | -1.16922 | 0.008125 | 0.023494 |
| FAM13B       | <a href="#">113261777</a> | -2.25296808 | -1.17183 | 0.003153 | 0.010444 |
| C2CD2L       | <a href="#">113259970</a> | -2.25531955 | -1.17333 | 0.005395 | 0.016638 |
| TRIOBP       | <a href="#">113241800</a> | -2.25578004 | -1.17363 | 0.002615 | 0.008872 |
| LOC113257253 | <a href="#">113257253</a> | -2.25582359 | -1.17365 | 0.002386 | 0.008199 |

|              |                           |             |          |          |          |
|--------------|---------------------------|-------------|----------|----------|----------|
| ERN1         | <a href="#">113265667</a> | -2.25633525 | -1.17398 | 0.003519 | 0.0115   |
| DLG3         | <a href="#">113245635</a> | -2.25703163 | -1.17443 | 0.010318 | 0.028684 |
| GNAI3        | <a href="#">113244920</a> | -2.25914498 | -1.17578 | 0.002221 | 0.007721 |
| CTSO         | <a href="#">113255784</a> | -2.25983633 | -1.17622 | 0.002782 | 0.009389 |
| ATXN7        | <a href="#">113257039</a> | -2.26004984 | -1.17635 | 0.008432 | 0.024207 |
| EIF2AK4      | <a href="#">113242045</a> | -2.26067022 | -1.17675 | 0.003648 | 0.01185  |
| RSU1         | <a href="#">113241374</a> | -2.26077241 | -1.17682 | 0.002167 | 0.007553 |
| TOP3A        | <a href="#">113271284</a> | -2.26118086 | -1.17708 | 0.002387 | 0.008201 |
| SAMD1        | <a href="#">113247173</a> | -2.26124632 | -1.17712 | 0.002845 | 0.009562 |
| NDC1         | <a href="#">113254647</a> | -2.26236851 | -1.17783 | 0.007904 | 0.022978 |
| BRWD3        | <a href="#">113242156</a> | -2.26248408 | -1.17791 | 0.005952 | 0.0181   |
| DARS2        | <a href="#">113262813</a> | -2.26407876 | -1.17892 | 0.008746 | 0.024959 |
| ATG3         | <a href="#">113251330</a> | -2.26425375 | -1.17904 | 0.001745 | 0.006249 |
| CBX3         | <a href="#">113261778</a> | -2.26561911 | -1.17991 | 0.007401 | 0.021718 |
| SLK          | <a href="#">113251899</a> | -2.2671161  | -1.18086 | 0.011993 | 0.032626 |
| SH3BP2       | <a href="#">113245745</a> | -2.26828514 | -1.1816  | 0.001587 | 0.005769 |
| RYBP         | <a href="#">113257084</a> | -2.26855687 | -1.18177 | 0.002999 | 0.010017 |
| LOC113249365 | <a href="#">113249365</a> | -2.26893527 | -1.18202 | 0.001664 | 0.006006 |
| HSPA4L       | <a href="#">113255652</a> | -2.27200188 | -1.18396 | 0.002939 | 0.009845 |
| RBM43        | <a href="#">113250891</a> | -2.2724275  | -1.18423 | 0.002471 | 0.008456 |
| PDCD10       | <a href="#">113255525</a> | -2.27265123 | -1.18438 | 0.002224 | 0.007726 |
| PIAS1        | <a href="#">113240901</a> | -2.27281241 | -1.18448 | 0.004056 | 0.012963 |
| NAA40        | <a href="#">113244193</a> | -2.27292752 | -1.18455 | 0.002106 | 0.007361 |
| CCNC         | <a href="#">113264799</a> | -2.27331088 | -1.18479 | 0.000679 | 0.002751 |
| AGFG2        | <a href="#">113267853</a> | -2.27551856 | -1.1862  | 0.002066 | 0.007236 |
| HNMT         | <a href="#">113263407</a> | -2.27884305 | -1.1883  | 0.003262 | 0.010748 |
| ARHGEF6      | <a href="#">113241872</a> | -2.2795886  | -1.18877 | 0.011291 | 0.030938 |
| ADAR         | <a href="#">113245303</a> | -2.2800601  | -1.18907 | 0.002481 | 0.008485 |

|          |                           |             |          |          |          |
|----------|---------------------------|-------------|----------|----------|----------|
| THAP1    | <a href="#">113245584</a> | -2.28023465 | -1.18918 | 0.002848 | 0.009569 |
| ZNF746   | <a href="#">113241462</a> | -2.28050028 | -1.18935 | 0.003919 | 0.012572 |
| SINHCAF  | <a href="#">113257753</a> | -2.28080557 | -1.18954 | 0.01119  | 0.030691 |
| POC5     | <a href="#">113255194</a> | -2.28366938 | -1.19135 | 0.003831 | 0.012359 |
| TPRA1    | <a href="#">113257274</a> | -2.28393083 | -1.19152 | 0.003373 | 0.011072 |
| PRDM10   | <a href="#">113259863</a> | -2.28458327 | -1.19193 | 0.008626 | 0.024676 |
| WVOX     | <a href="#">113251649</a> | -2.28465829 | -1.19198 | 0.019808 | 0.049841 |
| SLC30A7  | <a href="#">113254342</a> | -2.28484127 | -1.19209 | 0.00998  | 0.027866 |
| SSH3     | <a href="#">113244038</a> | -2.28662811 | -1.19322 | 0.003661 | 0.01188  |
| DKC1     | <a href="#">113247818</a> | -2.28760101 | -1.19384 | 0.002669 | 0.009049 |
| OTULIN   | <a href="#">113260835</a> | -2.2881677  | -1.19419 | 0.001465 | 0.005383 |
| LYPLA2   | <a href="#">113268516</a> | -2.28837227 | -1.19432 | 0.001967 | 0.006932 |
| UGGT2    | <a href="#">113251476</a> | -2.29013882 | -1.19544 | 0.017572 | 0.045084 |
| FAM126B  | <a href="#">113250597</a> | -2.29286621 | -1.19715 | 0.006828 | 0.020282 |
| SH3KBP1  | <a href="#">113242243</a> | -2.29299719 | -1.19723 | 0.002528 | 0.008626 |
| ACCS     | <a href="#">113265012</a> | -2.29344708 | -1.19752 | 0.019317 | 0.048895 |
| ABCC4    | <a href="#">113251471</a> | -2.2950493  | -1.19853 | 0.019432 | 0.049123 |
| ZNF689   | <a href="#">113267685</a> | -2.29551853 | -1.19882 | 0.005108 | 0.015889 |
| NAPRT    | <a href="#">113247656</a> | -2.29612939 | -1.1992  | 0.002206 | 0.007671 |
| TMEM170B | <a href="#">113264454</a> | -2.29854873 | -1.20072 | 0.010689 | 0.029513 |
| PRKDC    | <a href="#">113268119</a> | -2.30231002 | -1.20308 | 0.002346 | 0.008081 |
| GAPVD1   | <a href="#">113266412</a> | -2.30290401 | -1.20345 | 0.009777 | 0.027408 |
| AKAP10   | <a href="#">113271266</a> | -2.30324951 | -1.20367 | 0.001588 | 0.00577  |
| UNC119   | <a href="#">113269034</a> | -2.30337836 | -1.20375 | 0.002907 | 0.009748 |
| SND1     | <a href="#">113263729</a> | -2.30431806 | -1.20434 | 0.003794 | 0.012254 |
| RAP1GDS1 | <a href="#">113263127</a> | -2.30539178 | -1.20501 | 0.001647 | 0.005956 |
| RBM23    | <a href="#">113246050</a> | -2.30593509 | -1.20535 | 0.003696 | 0.011972 |
| PDS5A    | <a href="#">113262428</a> | -2.30785451 | -1.20655 | 0.001816 | 0.00647  |

|            |                           |             |          |          |          |
|------------|---------------------------|-------------|----------|----------|----------|
| SORD       | <a href="#">113269562</a> | -2.30831858 | -1.20684 | 0.002268 | 0.007858 |
| PBX3       | <a href="#">113266415</a> | -2.30976815 | -1.20775 | 0.005557 | 0.017054 |
| PAPOLA     | <a href="#">113267289</a> | -2.30977477 | -1.20775 | 0.007734 | 0.022547 |
| CUNH5orf15 | <a href="#">113261733</a> | -2.31074838 | -1.20836 | 0.001776 | 0.006345 |
| TAF15      | <a href="#">113268952</a> | -2.31150525 | -1.20883 | 0.001715 | 0.006159 |
| UHMK1      | <a href="#">113268670</a> | -2.31237234 | -1.20937 | 0.014447 | 0.038228 |
| STRN       | <a href="#">113241282</a> | -2.31406865 | -1.21043 | 0.003895 | 0.012515 |
| MERTK      | <a href="#">113242400</a> | -2.31485132 | -1.21092 | 0.008054 | 0.023333 |
| BAX        | <a href="#">113243322</a> | -2.31537928 | -1.21125 | 0.008359 | 0.024033 |
| ATP6V0A2   | <a href="#">113266887</a> | -2.31538259 | -1.21125 | 0.00202  | 0.007093 |
| JAK2       | <a href="#">113270160</a> | -2.31567987 | -1.21144 | 0.018734 | 0.047605 |
| PPM1D      | <a href="#">113268907</a> | -2.31676753 | -1.21211 | 0.003796 | 0.012255 |
| SRPK1      | <a href="#">113243851</a> | -2.31697367 | -1.21224 | 0.004285 | 0.013592 |
| BBS9       | <a href="#">113262551</a> | -2.31850259 | -1.21319 | 0.008776 | 0.025034 |
| STARD3NL   | <a href="#">113258380</a> | -2.31897481 | -1.21349 | 0.001831 | 0.006519 |
| SLC5A3     | <a href="#">113263134</a> | -2.31898417 | -1.21349 | 0.006341 | 0.019103 |
| RMI1       | <a href="#">113269806</a> | -2.32111265 | -1.21482 | 0.011003 | 0.030264 |
| CLCN7      | <a href="#">113245088</a> | -2.3211295  | -1.21483 | 0.002992 | 0.009998 |
| MAP3K2     | <a href="#">113263482</a> | -2.32319634 | -1.21611 | 0.005099 | 0.015863 |
| MAML1      | <a href="#">113261557</a> | -2.32503192 | -1.21725 | 0.00354  | 0.01155  |
| SLC38A10   | <a href="#">113244523</a> | -2.32513438 | -1.21731 | 0.003678 | 0.011922 |
| ATF7IP     | <a href="#">113257860</a> | -2.32602224 | -1.21786 | 0.002239 | 0.007766 |
| ITPRIP     | <a href="#">113251903</a> | -2.32690561 | -1.21841 | 0.003524 | 0.011511 |
| CEP70      | <a href="#">113253986</a> | -2.32752156 | -1.21879 | 0.001242 | 0.004656 |
| FCHSD2     | <a href="#">113269281</a> | -2.32814028 | -1.21918 | 0.001915 | 0.006767 |
| PDIA6      | <a href="#">113269914</a> | -2.32942726 | -1.21998 | 0.006525 | 0.019576 |
| MCRIP1     | <a href="#">113244504</a> | -2.3314335  | -1.22122 | 0.003076 | 0.010227 |
| CCDC167    | <a href="#">113243881</a> | -2.33443525 | -1.22307 | 0.004734 | 0.014855 |

|              |                           |             |          |          |          |
|--------------|---------------------------|-------------|----------|----------|----------|
| ZMYND8       | <a href="#">113258683</a> | -2.33462993 | -1.22319 | 0.0022   | 0.007654 |
| NOP58        | <a href="#">113250578</a> | -2.33473017 | -1.22326 | 0.001557 | 0.005674 |
| TRIM38       | <a href="#">113264255</a> | -2.33573658 | -1.22388 | 0.001022 | 0.003925 |
| SEC11A       | <a href="#">113263731</a> | -2.33716377 | -1.22476 | 0.000646 | 0.002629 |
| PIGG         | <a href="#">113245729</a> | -2.33752383 | -1.22498 | 0.000938 | 0.003642 |
| GMFB         | <a href="#">113242356</a> | -2.33873989 | -1.22573 | 0.001086 | 0.004134 |
| LOC113246347 | <a href="#">113246347</a> | -2.34055183 | -1.22685 | 0.003004 | 0.010028 |
| RAP2B        | <a href="#">113254081</a> | -2.34062711 | -1.2269  | 0.001852 | 0.006578 |
| AP2A2        | <a href="#">113243945</a> | -2.34106323 | -1.22716 | 0.006842 | 0.020301 |
| ATXN3        | <a href="#">113267348</a> | -2.34547643 | -1.22988 | 0.002566 | 0.008741 |
| M6PR         | <a href="#">113257920</a> | -2.34640737 | -1.23045 | 0.001472 | 0.005406 |
| HSPH1        | <a href="#">113251233</a> | -2.34679217 | -1.23069 | 0.000957 | 0.003707 |
| PIK3CB       | <a href="#">113253989</a> | -2.35038022 | -1.23289 | 0.002128 | 0.007429 |
| FUK          | <a href="#">113252471</a> | -2.35119523 | -1.23339 | 0.003361 | 0.011034 |
| ERRFI1       | <a href="#">113270554</a> | -2.35311367 | -1.23457 | 0.004718 | 0.014813 |
| TPST1        | <a href="#">113267749</a> | -2.35650253 | -1.23665 | 0.009833 | 0.027534 |
| FRYL         | <a href="#">113262473</a> | -2.35743054 | -1.23722 | 0.002066 | 0.007236 |
| ZDHHC3       | <a href="#">113256770</a> | -2.35891662 | -1.23812 | 0.001395 | 0.005153 |
| MPDU1        | <a href="#">113271157</a> | -2.36116124 | -1.2395  | 0.002237 | 0.00776  |
| AGO2         | <a href="#">113248463</a> | -2.36168936 | -1.23982 | 0.004094 | 0.013066 |
| FRMD8        | <a href="#">113244113</a> | -2.36304443 | -1.24065 | 0.001827 | 0.006504 |
| TXNDC11      | <a href="#">113270790</a> | -2.36323402 | -1.24076 | 0.00103  | 0.003954 |
| LGALS3       | <a href="#">113242344</a> | -2.36349122 | -1.24092 | 0.016396 | 0.042549 |
| STT3B        | <a href="#">113253844</a> | -2.36522174 | -1.24198 | 0.00927  | 0.026219 |
| MPP1         | <a href="#">113247819</a> | -2.36535933 | -1.24206 | 0.001454 | 0.005343 |
| INSIG1       | <a href="#">113241516</a> | -2.36564376 | -1.24223 | 0.002234 | 0.007756 |
| LOC113250365 | <a href="#">113250365</a> | -2.36638627 | -1.24269 | 0.001427 | 0.005259 |
| POLA1        | <a href="#">113242207</a> | -2.36813846 | -1.24375 | 0.003842 | 0.012383 |

|              |                           |             |          |          |          |
|--------------|---------------------------|-------------|----------|----------|----------|
| INAFM2       | <a href="#">113242037</a> | -2.36858365 | -1.24402 | 0.001796 | 0.00641  |
| LRR1         | <a href="#">113266193</a> | -2.37058346 | -1.24524 | 0.010446 | 0.02896  |
| SLC12A7      | <a href="#">113260783</a> | -2.37213559 | -1.24619 | 0.001159 | 0.004379 |
| LOC113244953 | <a href="#">113244953</a> | -2.37564775 | -1.24832 | 0.001225 | 0.0046   |
| DHX58        | <a href="#">113265431</a> | -2.37645784 | -1.24881 | 0.007464 | 0.021867 |
| FAM49A       | <a href="#">113270107</a> | -2.37910348 | -1.25042 | 0.002519 | 0.0086   |
| CASP9        | <a href="#">113270476</a> | -2.3796313  | -1.25074 | 0.001847 | 0.006562 |
| INTS2        | <a href="#">113268902</a> | -2.3797396  | -1.2508  | 0.004063 | 0.012983 |
| LOC113265899 | <a href="#">113265899</a> | -2.38059876 | -1.25132 | 0.004951 | 0.015448 |
| TEX30        | <a href="#">113251516</a> | -2.38134796 | -1.25178 | 0.019458 | 0.049179 |
| GMEB1        | <a href="#">113268407</a> | -2.38156891 | -1.25191 | 0.001279 | 0.004779 |
| TGFB1        | <a href="#">113243540</a> | -2.38282206 | -1.25267 | 0.003021 | 0.01007  |
| SAP30        | <a href="#">113269904</a> | -2.38511157 | -1.25406 | 0.002816 | 0.009484 |
| ATP6V0E1     | <a href="#">113264101</a> | -2.38523439 | -1.25413 | 0.000968 | 0.003739 |
| ASAH1        | <a href="#">113262148</a> | -2.38555865 | -1.25433 | 0.006657 | 0.019878 |
| TBCK         | <a href="#">113255530</a> | -2.38742277 | -1.25545 | 0.000694 | 0.002801 |
| COLGALT1     | <a href="#">113256686</a> | -2.38752404 | -1.25552 | 0.002458 | 0.008419 |
| ASB1         | <a href="#">113249875</a> | -2.38766829 | -1.2556  | 0.013193 | 0.035355 |
| MAN1A1       | <a href="#">113259398</a> | -2.39195053 | -1.25819 | 0.002458 | 0.008419 |
| ZEB2         | <a href="#">113263391</a> | -2.39499576 | -1.26002 | 0.00565  | 0.017304 |
| NCBP1        | <a href="#">113260423</a> | -2.396178   | -1.26074 | 0.001269 | 0.004748 |
| WLS          | <a href="#">113254544</a> | -2.39715961 | -1.26133 | 0.003155 | 0.010448 |
| HERPUD2      | <a href="#">113262709</a> | -2.39716868 | -1.26133 | 0.003633 | 0.011808 |
| SIPA1L1      | <a href="#">113270378</a> | -2.39795791 | -1.26181 | 0.001857 | 0.006592 |
| DCAF7        | <a href="#">113265292</a> | -2.39869696 | -1.26225 | 0.003716 | 0.012026 |
| PHF6         | <a href="#">113270972</a> | -2.39971997 | -1.26287 | 0.000563 | 0.00233  |
| PRR14L       | <a href="#">113245064</a> | -2.40044334 | -1.2633  | 0.004592 | 0.014453 |
| RAD50        | <a href="#">113261715</a> | -2.4009676  | -1.26362 | 0.000525 | 0.002191 |

|              |                           |             |          |          |          |
|--------------|---------------------------|-------------|----------|----------|----------|
| ATL3         | <a href="#">113244200</a> | -2.40356268 | -1.26517 | 0.006022 | 0.018297 |
| LOC113249588 | <a href="#">113249588</a> | -2.40490421 | -1.26598 | 0.006656 | 0.019878 |
| TBC1D2       | <a href="#">113260414</a> | -2.40544456 | -1.2663  | 0.007939 | 0.02306  |
| LOC113271041 | <a href="#">113271041</a> | -2.40669879 | -1.26706 | 0.001411 | 0.005206 |
| RIMS3        | <a href="#">113254828</a> | -2.41546477 | -1.2723  | 0.016556 | 0.042891 |
| LOC113245500 | <a href="#">113245500</a> | -2.41703716 | -1.27324 | 0.0054   | 0.01664  |
| RAD51C       | <a href="#">113268879</a> | -2.41965131 | -1.2748  | 0.0058   | 0.017716 |
| ERO1A        | <a href="#">113242373</a> | -2.42090801 | -1.27555 | 0.000895 | 0.003496 |
| CKS1B        | <a href="#">113245297</a> | -2.42096286 | -1.27558 | 0.000712 | 0.002868 |
| CUNH4orf33   | <a href="#">113255669</a> | -2.42176556 | -1.27606 | 0.007349 | 0.02158  |
| SRGAP1       | <a href="#">113256335</a> | -2.42266905 | -1.2766  | 0.013092 | 0.035148 |
| CTDP1        | <a href="#">113253546</a> | -2.42374623 | -1.27724 | 0.001405 | 0.005186 |
| IL4R         | <a href="#">113267608</a> | -2.42542281 | -1.27824 | 0.001087 | 0.004138 |
| PLEKHO1      | <a href="#">113246200</a> | -2.42762186 | -1.27954 | 0.000866 | 0.0034   |
| TMEM41A      | <a href="#">113254077</a> | -2.42813552 | -1.27985 | 0.001216 | 0.004569 |
| LOC113248631 | <a href="#">113248631</a> | -2.43070733 | -1.28138 | 0.002987 | 0.009989 |
| AGA          | <a href="#">113262234</a> | -2.43100602 | -1.28155 | 0.002255 | 0.007816 |
| ZNF281       | <a href="#">113242574</a> | -2.43322973 | -1.28287 | 0.003862 | 0.012426 |
| LOC113257653 | <a href="#">113257653</a> | -2.43483615 | -1.28382 | 0.010654 | 0.029428 |
| SLC5A6       | <a href="#">113271061</a> | -2.43540185 | -1.28416 | 0.014322 | 0.037934 |
| PARP16       | <a href="#">113240869</a> | -2.43598966 | -1.28451 | 0.004148 | 0.013223 |
| TESK2        | <a href="#">113254746</a> | -2.43704357 | -1.28513 | 0.00356  | 0.011611 |
| GCC2         | <a href="#">113267759</a> | -2.4371348  | -1.28519 | 0.000963 | 0.003721 |
| BTBD19       | <a href="#">113254758</a> | -2.43773996 | -1.28554 | 0.014741 | 0.038883 |
| LOC113249565 | <a href="#">113249565</a> | -2.43920986 | -1.28641 | 0.009216 | 0.026083 |
| TSPYL5       | <a href="#">113252901</a> | -2.4393394  | -1.28649 | 0.004    | 0.012807 |
| TMEM181      | <a href="#">113259336</a> | -2.43934649 | -1.28649 | 0.000979 | 0.00378  |
| GLTP         | <a href="#">113267095</a> | -2.44100227 | -1.28747 | 0.000729 | 0.002923 |

|              |                           |             |          |          |          |
|--------------|---------------------------|-------------|----------|----------|----------|
| NUP155       | <a href="#">113260902</a> | -2.44130759 | -1.28765 | 0.001602 | 0.005812 |
| P4HA2        | <a href="#">113261705</a> | -2.44239897 | -1.2883  | 0.004071 | 0.013003 |
| CCDC34       | <a href="#">113265091</a> | -2.44243863 | -1.28832 | 0.005728 | 0.017517 |
| SLC9A8       | <a href="#">113258703</a> | -2.44398274 | -1.28923 | 0.001882 | 0.006669 |
| FZR1         | <a href="#">113242800</a> | -2.44979586 | -1.29266 | 0.001276 | 0.00477  |
| ASXL1        | <a href="#">113258479</a> | -2.45054703 | -1.2931  | 0.001754 | 0.006275 |
| CSTB         | <a href="#">113253208</a> | -2.45185544 | -1.29387 | 0.001898 | 0.006719 |
| TBC1D1       | <a href="#">113262401</a> | -2.45276276 | -1.29441 | 0.001142 | 0.004325 |
| MBD2         | <a href="#">113253429</a> | -2.45534272 | -1.29592 | 0.000901 | 0.003514 |
| VAMP7        | <a href="#">113248338</a> | -2.45791717 | -1.29744 | 0.001509 | 0.005527 |
| MYO5A        | <a href="#">113269637</a> | -2.45803042 | -1.2975  | 0.000295 | 0.001318 |
| FBXO7        | <a href="#">113256021</a> | -2.45954416 | -1.29839 | 0.001003 | 0.00386  |
| BCORL1       | <a href="#">113270949</a> | -2.46009776 | -1.29872 | 0.00115  | 0.004352 |
| IGFBP4       | <a href="#">113265487</a> | -2.46023966 | -1.2988  | 0.014548 | 0.038442 |
| LOC113250152 | <a href="#">113250152</a> | -2.46615579 | -1.30226 | 0.018818 | 0.047792 |
| RFC5         | <a href="#">113267017</a> | -2.46845966 | -1.30361 | 0.002361 | 0.008119 |
| LGALS8       | <a href="#">113258940</a> | -2.46849696 | -1.30363 | 0.000632 | 0.00258  |
| ZNF789       | <a href="#">113267906</a> | -2.46969885 | -1.30434 | 0.009414 | 0.026547 |
| TMEM209      | <a href="#">113264171</a> | -2.47060692 | -1.30487 | 0.000562 | 0.002325 |
| CPEB2        | <a href="#">113266689</a> | -2.47258474 | -1.30602 | 0.001195 | 0.004499 |
| CTHRC1       | <a href="#">113252850</a> | -2.47387743 | -1.30677 | 0.018822 | 0.047793 |
| SRD5A3       | <a href="#">113262505</a> | -2.47469992 | -1.30725 | 0.00638  | 0.019203 |
| TAF6L        | <a href="#">113246934</a> | -2.47522235 | -1.30756 | 0.001622 | 0.005872 |
| TFDP1        | <a href="#">113247569</a> | -2.47553837 | -1.30774 | 0.000671 | 0.002721 |
| NONO         | <a href="#">113245615</a> | -2.4755509  | -1.30775 | 0.004109 | 0.01311  |
| MANSC1       | <a href="#">113257876</a> | -2.47564423 | -1.3078  | 0.00071  | 0.002862 |
| ITSN2        | <a href="#">113267964</a> | -2.47578897 | -1.30789 | 0.001836 | 0.006529 |
| PGRMC1       | <a href="#">113241269</a> | -2.47599168 | -1.30801 | 0.00083  | 0.003276 |

|              |                           |             |          |          |          |
|--------------|---------------------------|-------------|----------|----------|----------|
| PCGF6        | <a href="#">113251887</a> | -2.47700937 | -1.3086  | 0.005231 | 0.016211 |
| PDE3A        | <a href="#">113257829</a> | -2.47739101 | -1.30882 | 0.006268 | 0.018922 |
| HNRNPUL1     | <a href="#">113243542</a> | -2.47934848 | -1.30996 | 0.017342 | 0.044593 |
| NINJ1        | <a href="#">113270103</a> | -2.48051994 | -1.31064 | 0.001654 | 0.005972 |
| MARVELD1     | <a href="#">113251798</a> | -2.48148252 | -1.3112  | 0.003086 | 0.010251 |
| CDC42SE2     | <a href="#">113261694</a> | -2.48364902 | -1.31246 | 0.000801 | 0.003172 |
| CEMIP2       | <a href="#">113270218</a> | -2.48425365 | -1.31281 | 0.006833 | 0.020284 |
| NECTIN1      | <a href="#">113259953</a> | -2.48480973 | -1.31314 | 0.013498 | 0.036046 |
| PPP1R12A     | <a href="#">113256222</a> | -2.48493226 | -1.31321 | 0.003147 | 0.010425 |
| LOC113246915 | <a href="#">113246915</a> | -2.48508823 | -1.3133  | 0.001181 | 0.004452 |
| GNG10        | <a href="#">113260317</a> | -2.48695005 | -1.31438 | 0.006629 | 0.019812 |
| LOC113255280 | <a href="#">113255280</a> | -2.48729693 | -1.31458 | 0.019775 | 0.049776 |
| GRIPAP1      | <a href="#">113265940</a> | -2.48736034 | -1.31462 | 0.001189 | 0.00448  |
| SH3TC1       | <a href="#">113245686</a> | -2.48746073 | -1.31467 | 0.002041 | 0.00716  |
| GTPBP2       | <a href="#">113261256</a> | -2.48916879 | -1.31566 | 0.00171  | 0.006144 |
| ILF2         | <a href="#">113245334</a> | -2.48940623 | -1.3158  | 0.000563 | 0.002329 |
| PHLDA1       | <a href="#">113256247</a> | -2.49202596 | -1.31732 | 0.00557  | 0.01708  |
| MPV17L2      | <a href="#">113256709</a> | -2.49648498 | -1.3199  | 0.00102  | 0.00392  |
| GSTO1        | <a href="#">113251904</a> | -2.49662217 | -1.31998 | 0.001534 | 0.005603 |
| GLA          | <a href="#">113244306</a> | -2.49745976 | -1.32046 | 0.000592 | 0.002438 |
| IFIH1        | <a href="#">113250835</a> | -2.49872904 | -1.32119 | 0.002006 | 0.007052 |
| DAB2         | <a href="#">113260922</a> | -2.49921238 | -1.32147 | 0.00108  | 0.004112 |
| ST3GAL5      | <a href="#">113243005</a> | -2.50025133 | -1.32207 | 0.001316 | 0.004899 |
| SLC39A7      | <a href="#">113243792</a> | -2.50047581 | -1.3222  | 0.000991 | 0.003819 |
| PSMB10       | <a href="#">113252392</a> | -2.50248314 | -1.32336 | 0.013754 | 0.0366   |
| PLPP6        | <a href="#">113270168</a> | -2.50365409 | -1.32404 | 0.001872 | 0.006639 |
| EPHX1        | <a href="#">113262914</a> | -2.50395853 | -1.32421 | 0.019694 | 0.049646 |
| GCHFR        | <a href="#">113242025</a> | -2.50448814 | -1.32452 | 0.001157 | 0.004373 |

|              |                           |             |          |          |          |
|--------------|---------------------------|-------------|----------|----------|----------|
| MBP          | <a href="#">113253537</a> | -2.50710828 | -1.32602 | 0.014885 | 0.039219 |
| SLC31A2      | <a href="#">113266308</a> | -2.50883333 | -1.32702 | 0.000801 | 0.003172 |
| SLC31A1      | <a href="#">113266309</a> | -2.50930103 | -1.32729 | 0.000352 | 0.001538 |
| MRE11        | <a href="#">113259822</a> | -2.51005218 | -1.32772 | 0.001434 | 0.00528  |
| MYLIP        | <a href="#">113264487</a> | -2.51013389 | -1.32776 | 0.000604 | 0.002477 |
| SSC5D        | <a href="#">113247457</a> | -2.5114984  | -1.32855 | 0.017516 | 0.044964 |
| LOC113249736 | <a href="#">113249736</a> | -2.51293944 | -1.32938 | 0.005704 | 0.017453 |
| PLEKHF2      | <a href="#">113252914</a> | -2.51299759 | -1.32941 | 0.001323 | 0.004922 |
| RIF1         | <a href="#">113250886</a> | -2.51313423 | -1.32949 | 0.003915 | 0.012565 |
| GPR171       | <a href="#">113254068</a> | -2.5155776  | -1.33089 | 0.018582 | 0.047273 |
| LOC113249190 | <a href="#">113249190</a> | -2.51680194 | -1.33159 | 0.003915 | 0.012565 |
| RBM15        | <a href="#">113244907</a> | -2.51691892 | -1.33166 | 0.006309 | 0.019018 |
| PTEN         | <a href="#">113258976</a> | -2.52333201 | -1.33533 | 0.002867 | 0.009619 |
| UBXN2B       | <a href="#">113268080</a> | -2.52501751 | -1.33629 | 0.005363 | 0.016563 |
| NUDT22       | <a href="#">113244184</a> | -2.5253225  | -1.33647 | 0.000447 | 0.001896 |
| ATP6V1B2     | <a href="#">113270020</a> | -2.52815114 | -1.33808 | 0.002237 | 0.00776  |
| ABCG2        | <a href="#">113263158</a> | -2.5290758  | -1.33861 | 0.003808 | 0.012292 |
| PSMD10       | <a href="#">113241233</a> | -2.53038972 | -1.33936 | 0.000402 | 0.00173  |
| CLP1         | <a href="#">113246377</a> | -2.53119862 | -1.33982 | 0.002292 | 0.007929 |
| MIER1        | <a href="#">113254556</a> | -2.53121193 | -1.33983 | 0.001691 | 0.006083 |
| RBPM52       | <a href="#">113240854</a> | -2.53227735 | -1.34044 | 0.001904 | 0.006735 |
| RAN          | <a href="#">113266861</a> | -2.53256838 | -1.3406  | 0.002345 | 0.008079 |
| CRYBG1       | <a href="#">113264779</a> | -2.5331368  | -1.34092 | 0.000984 | 0.003791 |
| LOC113262286 | <a href="#">113262286</a> | -2.53380991 | -1.34131 | 0.002602 | 0.008838 |
| BTBD10       | <a href="#">113246272</a> | -2.53387911 | -1.34135 | 0.00098  | 0.003782 |
| HM13         | <a href="#">113258458</a> | -2.53435081 | -1.34162 | 0.000433 | 0.001845 |
| MINDY3       | <a href="#">113241381</a> | -2.53580859 | -1.34245 | 0.000639 | 0.002607 |
| SLC36A4      | <a href="#">113259838</a> | -2.53602973 | -1.34257 | 0.009768 | 0.027388 |

|              |                           |             |          |          |          |
|--------------|---------------------------|-------------|----------|----------|----------|
| ZNF276       | <a href="#">113252124</a> | -2.53696591 | -1.3431  | 0.000821 | 0.003246 |
| TNFRSF1A     | <a href="#">113257988</a> | -2.5378518  | -1.34361 | 0.000285 | 0.001277 |
| CBX5         | <a href="#">113257522</a> | -2.53996444 | -1.34481 | 0.006481 | 0.019457 |
| BCAP31       | <a href="#">113247825</a> | -2.54023606 | -1.34496 | 0.011251 | 0.030846 |
| FAM110A      | <a href="#">113258436</a> | -2.54212183 | -1.34603 | 0.008605 | 0.024631 |
| WAPL         | <a href="#">113259244</a> | -2.54282375 | -1.34643 | 0.00399  | 0.012779 |
| ARPC2        | <a href="#">113250468</a> | -2.54466958 | -1.34748 | 0.007301 | 0.021471 |
| ADAT1        | <a href="#">113252505</a> | -2.54517925 | -1.34777 | 0.013542 | 0.036128 |
| MGMT         | <a href="#">113252060</a> | -2.54730129 | -1.34897 | 0.01039  | 0.028858 |
| HHEX         | <a href="#">113243171</a> | -2.54887475 | -1.34986 | 0.002114 | 0.007384 |
| KLF13        | <a href="#">113263608</a> | -2.54976182 | -1.35036 | 0.003031 | 0.010097 |
| RNF40        | <a href="#">113267695</a> | -2.55051692 | -1.35079 | 0.000308 | 0.001371 |
| IRF2         | <a href="#">113262255</a> | -2.55162827 | -1.35142 | 0.000202 | 0.000938 |
| B9D2         | <a href="#">113243539</a> | -2.55316036 | -1.35228 | 0.001836 | 0.006529 |
| PGLS         | <a href="#">113256683</a> | -2.55498036 | -1.35331 | 0.000622 | 0.002545 |
| TLE3         | <a href="#">113240924</a> | -2.55567226 | -1.3537  | 0.001865 | 0.006616 |
| ALG9         | <a href="#">113260062</a> | -2.55568338 | -1.35371 | 0.002346 | 0.008081 |
| IFT140       | <a href="#">113245082</a> | -2.55662618 | -1.35424 | 0.000803 | 0.003179 |
| LOC113261234 | <a href="#">113261234</a> | -2.55704826 | -1.35448 | 0.008851 | 0.025229 |
| LOC113253952 | <a href="#">113253952</a> | -2.55867603 | -1.3554  | 0.000134 | 0.000652 |
| TGFBI        | <a href="#">113261760</a> | -2.5599001  | -1.35609 | 0.010715 | 0.029566 |
| HAPLN3       | <a href="#">113263678</a> | -2.5609689  | -1.35669 | 0.006527 | 0.019577 |
| LOC113262835 | <a href="#">113262835</a> | -2.56292548 | -1.35779 | 0.004395 | 0.013888 |
| LOC113264264 | <a href="#">113264264</a> | -2.56444712 | -1.35865 | 0.009314 | 0.026315 |
| RAB27B       | <a href="#">113253438</a> | -2.56458729 | -1.35873 | 0.008689 | 0.024833 |
| NUDT18       | <a href="#">113270012</a> | -2.5660593  | -1.35955 | 0.002778 | 0.009378 |
| GRK3         | <a href="#">113244983</a> | -2.56725062 | -1.36022 | 0.005939 | 0.018069 |
| SLC40A1      | <a href="#">113250671</a> | -2.56851509 | -1.36093 | 0.012995 | 0.034949 |

|              |                           |             |          |          |          |
|--------------|---------------------------|-------------|----------|----------|----------|
| PSAT1        | <a href="#">113269827</a> | -2.56853084 | -1.36094 | 0.003901 | 0.012532 |
| YWHAB        | <a href="#">113258642</a> | -2.56987878 | -1.3617  | 0.006402 | 0.019248 |
| ICMT         | <a href="#">113270577</a> | -2.57066775 | -1.36214 | 0.000319 | 0.001411 |
| SNRPF        | <a href="#">113256135</a> | -2.57282355 | -1.36335 | 0.001323 | 0.004922 |
| RALGPS2      | <a href="#">113262778</a> | -2.57368687 | -1.36384 | 0.000279 | 0.001253 |
| SAE1         | <a href="#">113243381</a> | -2.57382633 | -1.36391 | 0.000251 | 0.001141 |
| LOC113267225 | <a href="#">113267225</a> | -2.57598038 | -1.36512 | 0.008287 | 0.023861 |
| ATAD2B       | <a href="#">113270373</a> | -2.57671168 | -1.36553 | 0.00098  | 0.003782 |
| EBP          | <a href="#">113265916</a> | -2.57746232 | -1.36595 | 0.001181 | 0.004453 |
| URB2         | <a href="#">113259050</a> | -2.57778394 | -1.36613 | 0.001176 | 0.004436 |
| OSTM1        | <a href="#">113264768</a> | -2.57864187 | -1.36661 | 0.000253 | 0.001148 |
| GMNN         | <a href="#">113264328</a> | -2.58044729 | -1.36762 | 0.001413 | 0.005212 |
| CLTA         | <a href="#">113260453</a> | -2.58128929 | -1.36809 | 0.000344 | 0.001507 |
| SORT1        | <a href="#">113244928</a> | -2.58217567 | -1.36859 | 0.005338 | 0.016497 |
| TMEM151B     | <a href="#">113261245</a> | -2.58587704 | -1.37065 | 0.006181 | 0.018709 |
| BCL10        | <a href="#">113254469</a> | -2.586178   | -1.37082 | 0.000337 | 0.001481 |
| PICALM       | <a href="#">113269398</a> | -2.58734048 | -1.37147 | 0.009674 | 0.02716  |
| GBA          | <a href="#">113245275</a> | -2.58760591 | -1.37162 | 0.001314 | 0.004894 |
| PIK3R4       | <a href="#">113253924</a> | -2.58803451 | -1.37186 | 0.000431 | 0.001836 |
| GLMP         | <a href="#">113245238</a> | -2.59002624 | -1.37297 | 0.000766 | 0.003054 |
| SOAT1        | <a href="#">113262770</a> | -2.5912901  | -1.37367 | 0.000748 | 0.002994 |
| EMILIN1      | <a href="#">113270943</a> | -2.59370526 | -1.37501 | 0.008466 | 0.024295 |
| MSN          | <a href="#">113246893</a> | -2.59407851 | -1.37522 | 0.009885 | 0.02763  |
| NFE2L3       | <a href="#">113261744</a> | -2.59413297 | -1.37525 | 0.017889 | 0.045748 |
| LOC113256826 | <a href="#">113256826</a> | -2.59763608 | -1.3772  | 0.011363 | 0.031109 |
| SIAH2        | <a href="#">113254062</a> | -2.59983333 | -1.37842 | 0.002126 | 0.007422 |
| LOC113263782 | <a href="#">113263782</a> | -2.60054615 | -1.37881 | 0.003634 | 0.011809 |
| HMGB1        | <a href="#">113251226</a> | -2.60242506 | -1.37986 | 0.018586 | 0.047273 |

|              |                           |             |          |          |          |
|--------------|---------------------------|-------------|----------|----------|----------|
| UBE2J1       | <a href="#">113264829</a> | -2.60481706 | -1.38118 | 0.000324 | 0.001429 |
| BRMS1        | <a href="#">113244068</a> | -2.60529597 | -1.38145 | 0.000359 | 0.001564 |
| NUP50        | <a href="#">113241663</a> | -2.60532118 | -1.38146 | 0.000405 | 0.001742 |
| NRP2         | <a href="#">113250549</a> | -2.60567254 | -1.38166 | 0.010637 | 0.029389 |
| PAXBP1       | <a href="#">113265272</a> | -2.60571692 | -1.38168 | 0.001677 | 0.00604  |
| LOC113245466 | <a href="#">113245466</a> | -2.60925406 | -1.38364 | 0.003129 | 0.010377 |
| DNASE2       | <a href="#">113247207</a> | -2.61086255 | -1.38453 | 0.000508 | 0.00213  |
| ATP6V0C      | <a href="#">113245138</a> | -2.61236691 | -1.38536 | 0.001449 | 0.005329 |
| DOLPP1       | <a href="#">113266497</a> | -2.61629162 | -1.38752 | 0.00033  | 0.001453 |
| ANKRD13A     | <a href="#">113267099</a> | -2.61722251 | -1.38804 | 0.000727 | 0.002919 |
| DQX1         | <a href="#">113243528</a> | -2.61744776 | -1.38816 | 0.012239 | 0.033152 |
| LOC113246342 | <a href="#">113246342</a> | -2.62101884 | -1.39013 | 0.000452 | 0.001916 |
| KIF3B        | <a href="#">113258478</a> | -2.62113607 | -1.39019 | 0.000394 | 0.001698 |
| GDI1         | <a href="#">113247862</a> | -2.62161289 | -1.39045 | 0.00304  | 0.010121 |
| TNPO2        | <a href="#">113247136</a> | -2.62280623 | -1.39111 | 0.000217 | 0.001005 |
| MITD1        | <a href="#">113246906</a> | -2.62439848 | -1.39199 | 0.008935 | 0.025402 |
| MGAT2        | <a href="#">113266192</a> | -2.62599459 | -1.39286 | 0.000229 | 0.001052 |
| ARFGAP3      | <a href="#">113241687</a> | -2.62705498 | -1.39345 | 0.001158 | 0.004375 |
| LOC113248233 | <a href="#">113248233</a> | -2.62772052 | -1.39381 | 0.001325 | 0.004925 |
| LOC113246676 | <a href="#">113246676</a> | -2.62912228 | -1.39458 | 0.000407 | 0.001748 |
| MYL6         | <a href="#">113256436</a> | -2.62978987 | -1.39495 | 0.011562 | 0.031596 |
| L3MBTL2      | <a href="#">113241736</a> | -2.63079058 | -1.3955  | 0.000231 | 0.001058 |
| ATXN2L       | <a href="#">113267629</a> | -2.63095476 | -1.39559 | 0.000457 | 0.00193  |
| TNFRSF11A    | <a href="#">113253483</a> | -2.63171633 | -1.396   | 0.009297 | 0.026279 |
| CUNH7orf43   | <a href="#">113267874</a> | -2.63281203 | -1.3966  | 0.001649 | 0.005959 |
| ARF3         | <a href="#">113257663</a> | -2.63297216 | -1.39669 | 0.000199 | 0.000925 |
| SLC50A1      | <a href="#">113245283</a> | -2.63401265 | -1.39726 | 0.000259 | 0.00117  |
| SLX1A        | <a href="#">113267643</a> | -2.63417455 | -1.39735 | 0.000841 | 0.003314 |

|              |                           |             |          |          |          |
|--------------|---------------------------|-------------|----------|----------|----------|
| XRCC4        | <a href="#">113255136</a> | -2.63839905 | -1.39966 | 0.007054 | 0.020853 |
| NPC2         | <a href="#">113270336</a> | -2.63910245 | -1.40005 | 0.002712 | 0.009177 |
| CORO1C       | <a href="#">113267074</a> | -2.6408926  | -1.40103 | 0.000256 | 0.001159 |
| PELI1        | <a href="#">113244986</a> | -2.64205836 | -1.40166 | 0.000614 | 0.002516 |
| SEC24D       | <a href="#">113255607</a> | -2.642703   | -1.40201 | 0.000789 | 0.00313  |
| SLC38A1      | <a href="#">113257702</a> | -2.64417759 | -1.40282 | 0.002228 | 0.007737 |
| TM4SF18      | <a href="#">113254047</a> | -2.64441743 | -1.40295 | 0.01144  | 0.031294 |
| CAPN10       | <a href="#">113249676</a> | -2.64531395 | -1.40344 | 0.000467 | 0.001972 |
| BUB3         | <a href="#">113252025</a> | -2.64532407 | -1.40344 | 0.0007   | 0.002824 |
| ARFGEF1      | <a href="#">113253077</a> | -2.64542417 | -1.4035  | 0.000453 | 0.001918 |
| CLTC         | <a href="#">113268890</a> | -2.64688691 | -1.4043  | 0.007404 | 0.021718 |
| SUPT16H      | <a href="#">113248472</a> | -2.64814867 | -1.40498 | 0.000535 | 0.002222 |
| RPN2         | <a href="#">113258575</a> | -2.64918735 | -1.40555 | 0.001604 | 0.005819 |
| PASK         | <a href="#">113249542</a> | -2.64948697 | -1.40571 | 0.001214 | 0.004562 |
| DEGS1        | <a href="#">113262903</a> | -2.64971667 | -1.40584 | 0.000359 | 0.001566 |
| TTPAL        | <a href="#">113258635</a> | -2.65459192 | -1.40849 | 0.0005   | 0.002099 |
| EXOG         | <a href="#">113253789</a> | -2.65608159 | -1.4093  | 0.001545 | 0.005636 |
| RASGEF1B     | <a href="#">113263224</a> | -2.65704502 | -1.40982 | 0.003323 | 0.010933 |
| LOC113245454 | <a href="#">113245454</a> | -2.65887144 | -1.41081 | 0.001298 | 0.004841 |
| TACC1        | <a href="#">113262084</a> | -2.65966499 | -1.41124 | 0.001704 | 0.006125 |
| LOC113244531 | <a href="#">113244531</a> | -2.66070258 | -1.41181 | 0.003451 | 0.011305 |
| INTS6L       | <a href="#">113249099</a> | -2.66110046 | -1.41202 | 0.001676 | 0.006038 |
| CMAS         | <a href="#">113257802</a> | -2.6721174  | -1.41798 | 0.000788 | 0.003129 |
| SLC24A3      | <a href="#">113258306</a> | -2.67381921 | -1.4189  | 0.008196 | 0.023642 |
| SRSF7        | <a href="#">113241564</a> | -2.67383803 | -1.41891 | 0.000175 | 0.00083  |
| SERPINH1     | <a href="#">113269331</a> | -2.67454752 | -1.41929 | 0.019501 | 0.04926  |
| DGKG         | <a href="#">113253969</a> | -2.67628196 | -1.42023 | 0.013518 | 0.036079 |
| PTGDR2       | <a href="#">113246980</a> | -2.67629965 | -1.42024 | 0.003435 | 0.011261 |

|              |                           |             |          |          |          |
|--------------|---------------------------|-------------|----------|----------|----------|
| TMEM254      | <a href="#">113259225</a> | -2.67741965 | -1.42084 | 0.000453 | 0.001917 |
| ABCG1        | <a href="#">113255375</a> | -2.67880286 | -1.42159 | 0.004265 | 0.013541 |
| CSTF2        | <a href="#">113244295</a> | -2.6809439  | -1.42274 | 0.000655 | 0.002663 |
| OS9          | <a href="#">113256368</a> | -2.68250361 | -1.42358 | 0.001973 | 0.006948 |
| CUNH6orf62   | <a href="#">113264330</a> | -2.6825176  | -1.42359 | 0.008873 | 0.025279 |
| MICALL2      | <a href="#">113247745</a> | -2.6837582  | -1.42425 | 0.002834 | 0.009528 |
| LOC113263961 | <a href="#">113263961</a> | -2.68385402 | -1.42431 | 0.000752 | 0.003006 |
| RENBP        | <a href="#">113247849</a> | -2.68429965 | -1.42455 | 0.0003   | 0.00134  |
| HAUS6        | <a href="#">113260595</a> | -2.68536131 | -1.42512 | 0.000266 | 0.0012   |
| PLEKHO2      | <a href="#">113240857</a> | -2.68703488 | -1.42602 | 0.000493 | 0.002075 |
| SYNE3        | <a href="#">113267304</a> | -2.68711269 | -1.42606 | 0.001077 | 0.004103 |
| LIMK2        | <a href="#">113245055</a> | -2.68736625 | -1.42619 | 0.000216 | 0.001    |
| C1R          | <a href="#">113257944</a> | -2.68817706 | -1.42663 | 0.00091  | 0.003545 |
| LOC113250606 | <a href="#">113250606</a> | -2.69060307 | -1.42793 | 0.006692 | 0.019963 |
| GDAP2        | <a href="#">113244368</a> | -2.6913485  | -1.42833 | 0.001142 | 0.004325 |
| ABCB10       | <a href="#">113259052</a> | -2.69213744 | -1.42875 | 0.008022 | 0.023265 |
| RNF135       | <a href="#">113268993</a> | -2.69248867 | -1.42894 | 0.001347 | 0.005    |
| FAM184A      | <a href="#">113259397</a> | -2.69564361 | -1.43063 | 0.013394 | 0.03581  |
| ZBTB42       | <a href="#">113267191</a> | -2.6965404  | -1.43111 | 0.002318 | 0.008    |
| GALNT12      | <a href="#">113260408</a> | -2.69756655 | -1.43166 | 0.000225 | 0.001036 |
| SLC10A7      | <a href="#">113255729</a> | -2.70157577 | -1.4338  | 0.000856 | 0.003367 |
| LOC113266293 | <a href="#">113266293</a> | -2.70222629 | -1.43415 | 0.013703 | 0.0365   |
| SPG21        | <a href="#">113240860</a> | -2.70285158 | -1.43448 | 0.000123 | 0.000601 |
| IFNAR1       | <a href="#">113264796</a> | -2.704744   | -1.43549 | 0.001071 | 0.004085 |
| NEMP2        | <a href="#">113250657</a> | -2.70497155 | -1.43561 | 0.000236 | 0.001079 |
| SLC6A6       | <a href="#">113257221</a> | -2.70558914 | -1.43594 | 0.000775 | 0.003086 |
| RYR3         | <a href="#">113242078</a> | -2.70656263 | -1.43646 | 0.009204 | 0.026064 |
| SPHK2        | <a href="#">113243339</a> | -2.70904747 | -1.43779 | 0.001825 | 0.0065   |

|              |                           |             |          |          |          |
|--------------|---------------------------|-------------|----------|----------|----------|
| EML4         | <a href="#">113241799</a> | -2.70943356 | -1.43799 | 0.000434 | 0.001846 |
| PRPS2        | <a href="#">113240731</a> | -2.71251902 | -1.43963 | 0.000184 | 0.000868 |
| LIN52        | <a href="#">113270348</a> | -2.71309105 | -1.43994 | 0.000522 | 0.002181 |
| TAOK3        | <a href="#">113267022</a> | -2.71700577 | -1.44202 | 0.000166 | 0.000788 |
| BMP1         | <a href="#">113270006</a> | -2.7184142  | -1.44277 | 0.004375 | 0.013834 |
| TBC1D31      | <a href="#">113252760</a> | -2.71882435 | -1.44298 | 0.00015  | 0.000721 |
| PNMA1        | <a href="#">113270356</a> | -2.71898722 | -1.44307 | 0.009524 | 0.026811 |
| MAPK14       | <a href="#">113243852</a> | -2.72047795 | -1.44386 | 0.003319 | 0.010924 |
| TMEM160      | <a href="#">113243393</a> | -2.72055953 | -1.4439  | 0.000424 | 0.001809 |
| ACSL4        | <a href="#">113241237</a> | -2.72398608 | -1.44572 | 0.002816 | 0.009484 |
| LOC113246848 | <a href="#">113246848</a> | -2.72469319 | -1.44609 | 0.005567 | 0.017078 |
| KIF2A        | <a href="#">113255297</a> | -2.72531451 | -1.44642 | 0.00014  | 0.000676 |
| MCMBP        | <a href="#">113252003</a> | -2.72593857 | -1.44675 | 0.000295 | 0.001318 |
| FAM129C      | <a href="#">113256685</a> | -2.72692747 | -1.44728 | 0.001989 | 0.006997 |
| RAB31        | <a href="#">113253214</a> | -2.72868491 | -1.44821 | 0.004502 | 0.014193 |
| ADAM10       | <a href="#">113269679</a> | -2.73065677 | -1.44925 | 0.000125 | 0.000613 |
| NPRL3        | <a href="#">113245355</a> | -2.73228705 | -1.45011 | 0.00062  | 0.002537 |
| SPATA1       | <a href="#">113254480</a> | -2.73268462 | -1.45032 | 0.003175 | 0.010508 |
| PCNX4        | <a href="#">113242395</a> | -2.73280571 | -1.45038 | 0.000876 | 0.003428 |
| GBE1         | <a href="#">113247670</a> | -2.73367942 | -1.45084 | 0.001783 | 0.006368 |
| DPY19L3      | <a href="#">113244716</a> | -2.73414519 | -1.45109 | 0.000243 | 0.001107 |
| ATOX1        | <a href="#">113263981</a> | -2.73661619 | -1.45239 | 0.000117 | 0.000578 |
| NCBP3        | <a href="#">113269164</a> | -2.73709904 | -1.45265 | 0.000534 | 0.00222  |
| LOC113249352 | <a href="#">113249352</a> | -2.73970248 | -1.45402 | 0.007005 | 0.020728 |
| FBXL6        | <a href="#">113247686</a> | -2.73982008 | -1.45408 | 0.000685 | 0.002769 |
| TMED3        | <a href="#">113263787</a> | -2.74109631 | -1.45475 | 0.002343 | 0.008075 |
| CFAP410      | <a href="#">113251792</a> | -2.74193816 | -1.4552  | 0.005397 | 0.016638 |
| EME2         | <a href="#">113245103</a> | -2.74203567 | -1.45525 | 0.008159 | 0.023566 |

|              |                           |             |          |          |          |
|--------------|---------------------------|-------------|----------|----------|----------|
| TRADD        | <a href="#">113252355</a> | -2.74359483 | -1.45607 | 0.000109 | 0.000541 |
| EIF4A1       | <a href="#">113271150</a> | -2.74379352 | -1.45617 | 0.003711 | 0.012015 |
| PGGHG        | <a href="#">113248810</a> | -2.74781999 | -1.45829 | 0.000839 | 0.003307 |
| LRRK2        | <a href="#">113257729</a> | -2.75084146 | -1.45987 | 0.001489 | 0.005461 |
| ENC1         | <a href="#">113255212</a> | -2.75092597 | -1.45992 | 0.000215 | 0.000994 |
| GAK          | <a href="#">113245708</a> | -2.75105779 | -1.45999 | 0.000116 | 0.000575 |
| RAB11FIP1    | <a href="#">113262102</a> | -2.75196221 | -1.46046 | 0.000955 | 0.003699 |
| TTL7         | <a href="#">113254488</a> | -2.75207417 | -1.46052 | 0.003757 | 0.012144 |
| ADD3         | <a href="#">113251916</a> | -2.75211098 | -1.46054 | 0.000686 | 0.002772 |
| KLF16        | <a href="#">113242658</a> | -2.7526924  | -1.46084 | 0.00011  | 0.000548 |
| CNPPD1       | <a href="#">113250439</a> | -2.75343763 | -1.46123 | 0.000298 | 0.001331 |
| FOXRED2      | <a href="#">113255989</a> | -2.75510319 | -1.46211 | 0.000722 | 0.002903 |
| LOC113249657 | <a href="#">113249657</a> | -2.75512116 | -1.46212 | 0.004933 | 0.015411 |
| LOC113269409 | <a href="#">113269409</a> | -2.75611376 | -1.46264 | 0.007111 | 0.021002 |
| NECAP2       | <a href="#">113270452</a> | -2.75664416 | -1.46291 | 8.69E-05 | 0.000442 |
| ARHGAP42     | <a href="#">113260156</a> | -2.76020268 | -1.46477 | 0.001656 | 0.005978 |
| MAGI2        | <a href="#">113265932</a> | -2.76149908 | -1.46545 | 0.01814  | 0.046296 |
| HMGCR        | <a href="#">113255200</a> | -2.76353364 | -1.46651 | 0.001354 | 0.005019 |
| CYTIP        | <a href="#">113250866</a> | -2.76432265 | -1.46693 | 0.002549 | 0.008693 |
| KCND1        | <a href="#">113265939</a> | -2.76659408 | -1.46811 | 0.00921  | 0.026075 |
| SLC12A3      | <a href="#">113252268</a> | -2.76695008 | -1.4683  | 0.009527 | 0.026811 |
| POGLUT1      | <a href="#">113251857</a> | -2.76770633 | -1.46869 | 0.000182 | 0.00086  |
| LOC113256804 | <a href="#">113256804</a> | -2.76812269 | -1.46891 | 0.004587 | 0.014439 |
| EP300        | <a href="#">113241737</a> | -2.768643   | -1.46918 | 0.006055 | 0.018376 |
| LOC113254891 | <a href="#">113254891</a> | -2.76970469 | -1.46973 | 0.0096   | 0.026988 |
| WDPCP        | <a href="#">113245028</a> | -2.77334954 | -1.47163 | 0.004738 | 0.014863 |
| KDM6B        | <a href="#">113271139</a> | -2.7760002  | -1.47301 | 0.001612 | 0.00584  |
| POLH         | <a href="#">113261257</a> | -2.7761757  | -1.4731  | 0.000648 | 0.002637 |

|              |                           |             |          |          |          |
|--------------|---------------------------|-------------|----------|----------|----------|
| KCTD11       | <a href="#">113271130</a> | -2.77682818 | -1.47344 | 0.000541 | 0.002245 |
| KLF5         | <a href="#">113251418</a> | -2.7801368  | -1.47516 | 0.005393 | 0.016635 |
| ADSS         | <a href="#">113262960</a> | -2.78155563 | -1.47589 | 0.000201 | 0.000936 |
| MIF4GD       | <a href="#">113244642</a> | -2.78359746 | -1.47695 | 0.000137 | 0.000663 |
| LOC113246662 | <a href="#">113246662</a> | -2.78404375 | -1.47718 | 0.01925  | 0.048781 |
| MRC2         | <a href="#">113265302</a> | -2.7843881  | -1.47736 | 0.013442 | 0.035918 |
| GLB1L        | <a href="#">113250436</a> | -2.78698477 | -1.47871 | 0.001952 | 0.006883 |
| ABC6         | <a href="#">113250434</a> | -2.78830209 | -1.47939 | 0.005839 | 0.017821 |
| LOC113257933 | <a href="#">113257933</a> | -2.78943444 | -1.47997 | 0.002293 | 0.00793  |
| CCDC15       | <a href="#">113259910</a> | -2.79245583 | -1.48153 | 0.000749 | 0.002994 |
| ARL4A        | <a href="#">113260801</a> | -2.79327286 | -1.48196 | 0.000791 | 0.003137 |
| LRCH4        | <a href="#">113267852</a> | -2.79451259 | -1.4826  | 0.000661 | 0.002682 |
| CBX2         | <a href="#">113244545</a> | -2.79480271 | -1.48275 | 0.009789 | 0.027434 |
| TMEM135      | <a href="#">113269408</a> | -2.79809446 | -1.48444 | 0.001788 | 0.006384 |
| IL7          | <a href="#">113253022</a> | -2.79916278 | -1.485   | 0.010266 | 0.028562 |
| GUSB         | <a href="#">113267745</a> | -2.80005787 | -1.48546 | 0.000152 | 0.00073  |
| ACBD7        | <a href="#">113241387</a> | -2.80092555 | -1.4859  | 0.007254 | 0.021351 |
| BACE2        | <a href="#">113256938</a> | -2.80274918 | -1.48684 | 0.000112 | 0.000557 |
| B3GNT2       | <a href="#">113245108</a> | -2.80361261 | -1.48729 | 0.000239 | 0.001092 |
| SMAP2        | <a href="#">113268231</a> | -2.80496447 | -1.48798 | 0.001432 | 0.005274 |
| LOC113265665 | <a href="#">113265665</a> | -2.80626653 | -1.48865 | 0.011616 | 0.031717 |
| USP1         | <a href="#">113254591</a> | -2.80727192 | -1.48917 | 0.000162 | 0.000773 |
| LOC113253800 | <a href="#">113253800</a> | -2.81112429 | -1.49115 | 0.001645 | 0.00595  |
| STS          | <a href="#">113240763</a> | -2.8113972  | -1.49129 | 0.019354 | 0.04897  |
| PAN2         | <a href="#">113256422</a> | -2.81563657 | -1.49346 | 0.000579 | 0.002391 |
| TRIM27       | <a href="#">113248142</a> | -2.81657174 | -1.49394 | 0.000186 | 0.000875 |
| GEM          | <a href="#">113252928</a> | -2.81738996 | -1.49436 | 0.004316 | 0.013677 |
| CCP110       | <a href="#">113270733</a> | -2.81812686 | -1.49474 | 0.000583 | 0.002408 |

|              |                           |             |          |          |          |
|--------------|---------------------------|-------------|----------|----------|----------|
| LCMT2        | <a href="#">113241970</a> | -2.81841563 | -1.49488 | 0.00639  | 0.019219 |
| UCK2         | <a href="#">113268697</a> | -2.81918508 | -1.49528 | 0.000229 | 0.001048 |
| CEP135       | <a href="#">113262516</a> | -2.82260316 | -1.49703 | 0.000777 | 0.003092 |
| MOB1A        | <a href="#">113243805</a> | -2.82282583 | -1.49714 | 0.001683 | 0.00606  |
| CUNH21orf91  | <a href="#">113243447</a> | -2.82408944 | -1.49779 | 2.2E-05  | 0.000128 |
| SPEF1        | <a href="#">113258387</a> | -2.82470392 | -1.4981  | 0.009489 | 0.026728 |
| SERINC5      | <a href="#">113255162</a> | -2.8248308  | -1.49816 | 0.00011  | 0.000546 |
| STAG2        | <a href="#">113270930</a> | -2.82754176 | -1.49955 | 0.003513 | 0.011481 |
| PJKV         | <a href="#">113250715</a> | -2.82858452 | -1.50008 | 0.015306 | 0.040152 |
| GNB1         | <a href="#">113270618</a> | -2.82950455 | -1.50055 | 0.002229 | 0.007741 |
| SKA2         | <a href="#">113268883</a> | -2.83361069 | -1.50264 | 0.000533 | 0.002217 |
| CAMKK2       | <a href="#">113266952</a> | -2.83743158 | -1.50459 | 0.013413 | 0.035848 |
| P2RX4        | <a href="#">113266953</a> | -2.83760886 | -1.50468 | 0.000361 | 0.001572 |
| TMEM260      | <a href="#">113242335</a> | -2.83783175 | -1.50479 | 8.89E-05 | 0.000451 |
| USP32        | <a href="#">113268909</a> | -2.83803328 | -1.50489 | 0.000907 | 0.003536 |
| PPP6R1       | <a href="#">113247377</a> | -2.83843686 | -1.5051  | 0.000565 | 0.002336 |
| TRAM2        | <a href="#">113261193</a> | -2.83950574 | -1.50564 | 0.000228 | 0.001045 |
| LOC113271103 | <a href="#">113271103</a> | -2.84004276 | -1.50591 | 0.009884 | 0.02763  |
| GRAMD4       | <a href="#">113241638</a> | -2.84163436 | -1.50672 | 0.000246 | 0.001119 |
| HEXIM2       | <a href="#">113265327</a> | -2.84521228 | -1.50854 | 0.004749 | 0.01489  |
| CDK18        | <a href="#">113242443</a> | -2.84541058 | -1.50864 | 0.00613  | 0.018578 |
| GGH          | <a href="#">113268062</a> | -2.84544808 | -1.50866 | 0.000151 | 0.000724 |
| ORC5         | <a href="#">113258845</a> | -2.84831636 | -1.51011 | 0.000513 | 0.002148 |
| GDPD5        | <a href="#">113269330</a> | -2.8490393  | -1.51048 | 0.012563 | 0.033896 |
| LMF2         | <a href="#">113241605</a> | -2.84919299 | -1.51055 | 0.000198 | 0.000924 |
| STEAP3       | <a href="#">113263450</a> | -2.84943462 | -1.51068 | 0.00021  | 0.000971 |
| GIT2         | <a href="#">113267098</a> | -2.85203281 | -1.51199 | 0.000303 | 0.001349 |
| SEC62        | <a href="#">113255273</a> | -2.85213224 | -1.51204 | 0.001806 | 0.006441 |

|              |                           |             |          |          |          |
|--------------|---------------------------|-------------|----------|----------|----------|
| STK38        | <a href="#">113243862</a> | -2.85344861 | -1.51271 | 0.000115 | 0.000568 |
| PPP1R9B      | <a href="#">113265610</a> | -2.85522601 | -1.5136  | 0.000508 | 0.00213  |
| SBNO2        | <a href="#">113242718</a> | -2.8567904  | -1.5144  | 0.000122 | 0.000596 |
| LYVE1        | <a href="#">113245789</a> | -2.85681242 | -1.51441 | 0.01602  | 0.041734 |
| CEP192       | <a href="#">113245976</a> | -2.85706073 | -1.51453 | 0.000253 | 0.001146 |
| RNF213       | <a href="#">113244535</a> | -2.85999863 | -1.51601 | 0.000409 | 0.001754 |
| TMEM176B     | <a href="#">113241471</a> | -2.86571933 | -1.5189  | 0.000392 | 0.001691 |
| PPP2R1B      | <a href="#">113260072</a> | -2.86643968 | -1.51926 | 6.32E-05 | 0.000332 |
| ODF2         | <a href="#">113266470</a> | -2.8711565  | -1.52163 | 0.000169 | 0.000804 |
| PLVAP        | <a href="#">113256677</a> | -2.87130581 | -1.52171 | 0.000217 | 0.001002 |
| CDC42SE1     | <a href="#">113246132</a> | -2.87300918 | -1.52256 | 0.000183 | 0.000862 |
| CLDN7        | <a href="#">113271113</a> | -2.87456833 | -1.52335 | 0.013736 | 0.036566 |
| ACAT2        | <a href="#">113259619</a> | -2.87576905 | -1.52395 | 0.000121 | 0.000592 |
| ATP11B       | <a href="#">113254601</a> | -2.87767914 | -1.52491 | 0.003959 | 0.012694 |
| LOC113252395 | <a href="#">113252395</a> | -2.88123896 | -1.52669 | 0.001354 | 0.005019 |
| EEF1AKMT3    | <a href="#">113256362</a> | -2.88467376 | -1.52841 | 0.008413 | 0.024166 |
| KIF27        | <a href="#">113269811</a> | -2.88506011 | -1.5286  | 0.00322  | 0.010635 |
| ARRDC5       | <a href="#">113242849</a> | -2.88554365 | -1.52884 | 0.009286 | 0.026253 |
| FAM126A      | <a href="#">113261337</a> | -2.88670453 | -1.52942 | 0.000133 | 0.000646 |
| LOC113267063 | <a href="#">113267063</a> | -2.8876333  | -1.52989 | 2.76E-05 | 0.000157 |
| SAG          | <a href="#">113250331</a> | -2.88788323 | -1.53001 | 0.008531 | 0.024439 |
| UNG          | <a href="#">113267082</a> | -2.88875786 | -1.53045 | 0.00015  | 0.00072  |
| ODC1         | <a href="#">113269829</a> | -2.88920752 | -1.53067 | 0.000151 | 0.000724 |
| ZNRF2        | <a href="#">113262287</a> | -2.8931378  | -1.53264 | 0.00039  | 0.001684 |
| LOC113247073 | <a href="#">113247073</a> | -2.89362921 | -1.53288 | 0.001269 | 0.004747 |
| MCM9         | <a href="#">113259395</a> | -2.89420294 | -1.53317 | 0.00064  | 0.002609 |
| CUNH2orf96   | <a href="#">113258451</a> | -2.89485857 | -1.53349 | 0.006472 | 0.019433 |
| LIME1        | <a href="#">113258819</a> | -2.89621526 | -1.53417 | 0.008009 | 0.023243 |

|              |                           |             |          |          |          |
|--------------|---------------------------|-------------|----------|----------|----------|
| HEXB         | <a href="#">113255209</a> | -2.89876734 | -1.53544 | 0.000118 | 0.00058  |
| SLC29A3      | <a href="#">113259150</a> | -2.89977334 | -1.53594 | 0.003176 | 0.010509 |
| PSMB8        | <a href="#">113243782</a> | -2.90058263 | -1.53634 | 0.000135 | 0.000655 |
| AMIGO3       | <a href="#">113256883</a> | -2.9006438  | -1.53637 | 0.001019 | 0.003916 |
| MTA2         | <a href="#">113246959</a> | -2.90103366 | -1.53657 | 0.000121 | 0.000595 |
| POLD3        | <a href="#">113269314</a> | -2.90122144 | -1.53666 | 0.000623 | 0.002545 |
| NEK8         | <a href="#">113269046</a> | -2.90152579 | -1.53681 | 0.004669 | 0.014682 |
| S100A11      | <a href="#">113246225</a> | -2.90175847 | -1.53693 | 0.00048  | 0.002024 |
| VDR          | <a href="#">113257683</a> | -2.90199108 | -1.53704 | 0.015881 | 0.041481 |
| LRRC59       | <a href="#">113265621</a> | -2.90530217 | -1.53869 | 0.000165 | 0.000786 |
| CLPTM1L      | <a href="#">113260789</a> | -2.90547681 | -1.53877 | 9.08E-05 | 0.000459 |
| TDP1         | <a href="#">113267370</a> | -2.90793999 | -1.54    | 0.000868 | 0.003405 |
| INTS10       | <a href="#">113245552</a> | -2.90908332 | -1.54056 | 3.01E-05 | 0.000169 |
| RGS8         | <a href="#">113262729</a> | -2.90912844 | -1.54059 | 0.005266 | 0.016298 |
| PKHD1L1      | <a href="#">113252814</a> | -2.90919762 | -1.54062 | 0.003054 | 0.010163 |
| NUP43        | <a href="#">113259549</a> | -2.90938743 | -1.54072 | 0.000296 | 0.00132  |
| CCDC14       | <a href="#">113252401</a> | -2.91293679 | -1.54247 | 0.001393 | 0.005149 |
| DNAJC13      | <a href="#">113253939</a> | -2.91538365 | -1.54369 | 0.00105  | 0.004018 |
| QPCTL        | <a href="#">113243418</a> | -2.9189876  | -1.54547 | 0.0002   | 0.00093  |
| LOC113248523 | <a href="#">113248523</a> | -2.92027896 | -1.54611 | 0.003061 | 0.010182 |
| LOC113258529 | <a href="#">113258529</a> | -2.9204038  | -1.54617 | 9.3E-06  | 5.92E-05 |
| TXNDC5       | <a href="#">113264432</a> | -2.92149312 | -1.54671 | 0.000281 | 0.001259 |
| MOCS1        | <a href="#">113243900</a> | -2.92570963 | -1.54879 | 1.9E-05  | 0.000112 |
| LOC113246330 | <a href="#">113246330</a> | -2.92968546 | -1.55075 | 0.006989 | 0.020687 |
| LRRC45       | <a href="#">113244488</a> | -2.92991672 | -1.55086 | 8.94E-05 | 0.000453 |
| PTX3         | <a href="#">113254114</a> | -2.93259339 | -1.55218 | 0.014275 | 0.037816 |
| FBXL19       | <a href="#">113267707</a> | -2.93592157 | -1.55381 | 0.001055 | 0.004034 |
| LOC113262782 | <a href="#">113262782</a> | -2.93749866 | -1.55459 | 0.000515 | 0.002155 |

|              |                           |             |          |          |          |
|--------------|---------------------------|-------------|----------|----------|----------|
| TMCO1        | <a href="#">113268694</a> | -2.93978108 | -1.55571 | 1.18E-05 | 7.34E-05 |
| G2E3         | <a href="#">113266090</a> | -2.94297435 | -1.55727 | 9.88E-05 | 0.000496 |
| ITSN1        | <a href="#">113263634</a> | -2.94341414 | -1.55749 | 0.000217 | 0.001002 |
| ARMC5        | <a href="#">113267725</a> | -2.94698593 | -1.55924 | 0.000217 | 0.001004 |
| PGM3         | <a href="#">113261065</a> | -2.94760555 | -1.55954 | 0.000297 | 0.001325 |
| PARP9        | <a href="#">113252262</a> | -2.95013675 | -1.56078 | 2.38E-05 | 0.000137 |
| CASP8AP2     | <a href="#">113264820</a> | -2.95043808 | -1.56093 | 0.000528 | 0.002199 |
| ARSA         | <a href="#">113241595</a> | -2.95223445 | -1.56181 | 0.000223 | 0.001029 |
| PIIB         | <a href="#">113240844</a> | -2.95316904 | -1.56226 | 0.002612 | 0.008863 |
| WDR34        | <a href="#">113266476</a> | -2.95505892 | -1.56319 | 7.43E-05 | 0.000383 |
| TUBE1        | <a href="#">113264717</a> | -2.9553361  | -1.56332 | 0.008215 | 0.023677 |
| TBC1D5       | <a href="#">113253896</a> | -2.95706674 | -1.56417 | 0.000131 | 0.000639 |
| DYNLL1       | <a href="#">113267044</a> | -2.96154835 | -1.56635 | 0.000111 | 0.000553 |
| HFE          | <a href="#">113264259</a> | -2.96175132 | -1.56645 | 2.52E-05 | 0.000144 |
| UHRF2        | <a href="#">113260624</a> | -2.96361509 | -1.56736 | 0.000151 | 0.000724 |
| LOC113252869 | <a href="#">113252869</a> | -2.96398529 | -1.56754 | 0.000995 | 0.003833 |
| MPHOSPH9     | <a href="#">113266905</a> | -2.96696756 | -1.56899 | 0.000125 | 0.000613 |
| LOC113250446 | <a href="#">113250446</a> | -2.9677689  | -1.56938 | 0.009372 | 0.026439 |
| TRARG1       | <a href="#">113269092</a> | -2.96924043 | -1.57009 | 0.010713 | 0.029566 |
| CTSA         | <a href="#">113258664</a> | -2.97169744 | -1.57129 | 5.16E-05 | 0.000276 |
| BAZ1A        | <a href="#">113266121</a> | -2.97502885 | -1.5729  | 0.000855 | 0.003364 |
| AP3B1        | <a href="#">113255176</a> | -2.9759875  | -1.57337 | 3.55E-05 | 0.000196 |
| RNF26        | <a href="#">113259961</a> | -2.97653693 | -1.57363 | 4.04E-05 | 0.00022  |
| DTNB         | <a href="#">113270659</a> | -2.97684046 | -1.57378 | 0.001388 | 0.005134 |
| AATK         | <a href="#">113244526</a> | -2.97762145 | -1.57416 | 0.001834 | 0.006524 |
| PDE8B        | <a href="#">113255180</a> | -2.97798959 | -1.57434 | 0.00905  | 0.025676 |
| ACSF2        | <a href="#">113265618</a> | -2.97910158 | -1.57488 | 0.004861 | 0.015197 |
| SLC2A10      | <a href="#">113258680</a> | -2.98099284 | -1.57579 | 0.009212 | 0.026076 |

|              |                           |             |          |          |          |
|--------------|---------------------------|-------------|----------|----------|----------|
| KLF3         | <a href="#">113262407</a> | -2.98172147 | -1.57615 | 0.000165 | 0.000787 |
| LRWD1        | <a href="#">113267820</a> | -2.98269695 | -1.57662 | 9.94E-05 | 0.000499 |
| SNX30        | <a href="#">113266299</a> | -2.98324933 | -1.57688 | 0.000558 | 0.002313 |
| PTH1R        | <a href="#">113256800</a> | -2.98417675 | -1.57733 | 0.015172 | 0.039873 |
| ELMO3        | <a href="#">113252348</a> | -2.98484297 | -1.57766 | 0.003532 | 0.011536 |
| AP1B1        | <a href="#">113245013</a> | -2.98640498 | -1.57841 | 0.00069  | 0.002788 |
| SENP1        | <a href="#">113257680</a> | -2.98950084 | -1.5799  | 0.000107 | 0.000532 |
| SUV39H1      | <a href="#">113265922</a> | -2.9909402  | -1.5806  | 0.000466 | 0.001969 |
| TM7SF3       | <a href="#">113257779</a> | -2.99387442 | -1.58201 | 5.87E-05 | 0.00031  |
| CHEK2        | <a href="#">113244997</a> | -2.99389275 | -1.58202 | 0.004312 | 0.013669 |
| HDHD3        | <a href="#">113266317</a> | -2.99397506 | -1.58206 | 0.004276 | 0.013567 |
| STK17A       | <a href="#">113258037</a> | -2.99691615 | -1.58348 | 4.31E-05 | 0.000233 |
| JDP2         | <a href="#">113270315</a> | -3.00002597 | -1.58497 | 8.84E-05 | 0.000449 |
| LYST         | <a href="#">113259277</a> | -3.00233513 | -1.58609 | 0.001711 | 0.006144 |
| KLHL2        | <a href="#">113255823</a> | -3.00407371 | -1.58692 | 4.86E-05 | 0.000261 |
| GNAI2        | <a href="#">113256902</a> | -3.00440226 | -1.58708 | 0.003653 | 0.011857 |
| SLC18A2      | <a href="#">113251976</a> | -3.0053329  | -1.58752 | 0.001857 | 0.006592 |
| LOC113248746 | <a href="#">113248746</a> | -3.00535556 | -1.58754 | 0.016792 | 0.04339  |
| MAFG         | <a href="#">113244494</a> | -3.00633962 | -1.58801 | 0.00151  | 0.005528 |
| EDEM1        | <a href="#">113257120</a> | -3.009666   | -1.5896  | 2.99E-05 | 0.000168 |
| SDC1         | <a href="#">113270259</a> | -3.01003073 | -1.58978 | 0.009539 | 0.02684  |
| RBP4         | <a href="#">113243178</a> | -3.01014679 | -1.58983 | 0.011434 | 0.031284 |
| TMEM63A      | <a href="#">113262913</a> | -3.01424637 | -1.5918  | 1.13E-05 | 7.03E-05 |
| UNC93B1      | <a href="#">113244011</a> | -3.01494652 | -1.59213 | 2.99E-05 | 0.000168 |
| FAM241B      | <a href="#">113259131</a> | -3.01696594 | -1.5931  | 0.002255 | 0.007816 |
| MKRN1        | <a href="#">113265080</a> | -3.01885134 | -1.594   | 0.001034 | 0.003964 |
| ROCK1        | <a href="#">113253267</a> | -3.01899926 | -1.59407 | 0.000129 | 0.000627 |
| CBS          | <a href="#">113254145</a> | -3.02077054 | -1.59492 | 0.002237 | 0.00776  |

|          |                           |             |          |          |          |
|----------|---------------------------|-------------|----------|----------|----------|
| ASAP1    | <a href="#">113252718</a> | -3.02280441 | -1.59589 | 9.98E-05 | 0.000501 |
| SNCA     | <a href="#">113263144</a> | -3.0269953  | -1.59789 | 0.003887 | 0.012498 |
| BCR      | <a href="#">113247026</a> | -3.02705355 | -1.59791 | 7.77E-05 | 0.000399 |
| PLA2R1   | <a href="#">113250847</a> | -3.02713449 | -1.59795 | 0.000183 | 0.000862 |
| ZDHHC20  | <a href="#">113251179</a> | -3.02882123 | -1.59876 | 4.59E-05 | 0.000248 |
| TRAPPC6A | <a href="#">113243441</a> | -3.02982339 | -1.59923 | 0.000264 | 0.001194 |
| SLC37A1  | <a href="#">113255147</a> | -3.03244043 | -1.60048 | 0.001943 | 0.006855 |
| SYNJ1    | <a href="#">113265426</a> | -3.03309295 | -1.60079 | 4.38E-05 | 0.000237 |
| BANK1    | <a href="#">113263104</a> | -3.0332397  | -1.60086 | 0.001057 | 0.004039 |
| CXXC1    | <a href="#">113253415</a> | -3.03399363 | -1.60122 | 2.78E-05 | 0.000158 |
| SFT2D1   | <a href="#">113259642</a> | -3.03417217 | -1.6013  | 3.41E-05 | 0.000189 |
| SLC35D1  | <a href="#">113254557</a> | -3.03497188 | -1.60168 | 0.000526 | 0.002194 |
| ARHGEF2  | <a href="#">113245255</a> | -3.0392731  | -1.60373 | 0.001328 | 0.004938 |
| THG1L    | <a href="#">113264024</a> | -3.04279818 | -1.6054  | 0.000792 | 0.003137 |
| PDE1B    | <a href="#">113257511</a> | -3.04302535 | -1.60551 | 0.002166 | 0.007552 |
| PROSER2  | <a href="#">113241063</a> | -3.04397193 | -1.60596 | 0.009584 | 0.026961 |
| DHCR7    | <a href="#">113243974</a> | -3.04429048 | -1.60611 | 0.000127 | 0.000619 |
| FBXO48   | <a href="#">113244705</a> | -3.04433626 | -1.60613 | 0.000864 | 0.003392 |
| NASP     | <a href="#">113254738</a> | -3.04497077 | -1.60643 | 1.62E-05 | 9.74E-05 |
| SACM1L   | <a href="#">113256778</a> | -3.04583227 | -1.60684 | 3.02E-05 | 0.000169 |
| SRSF9    | <a href="#">113267041</a> | -3.04677647 | -1.60728 | 3.25E-05 | 0.000181 |
| CD14     | <a href="#">113261829</a> | -3.0468291  | -1.60731 | 4.27E-05 | 0.000231 |
| ARHGAP23 | <a href="#">113265689</a> | -3.04707953 | -1.60743 | 0.0007   | 0.002824 |
| ABHD15   | <a href="#">113269074</a> | -3.0511142  | -1.60934 | 0.00056  | 0.002321 |
| OGG1     | <a href="#">113257143</a> | -3.05480597 | -1.61108 | 0.003333 | 0.010958 |
| MRTFA    | <a href="#">113241747</a> | -3.05497601 | -1.61116 | 0.000438 | 0.001861 |
| ILDR2    | <a href="#">113262892</a> | -3.05845779 | -1.6128  | 0.01484  | 0.039122 |
| COL4A5   | <a href="#">113241173</a> | -3.05894673 | -1.61303 | 0.0005   | 0.0021   |

|              |                           |             |          |          |          |
|--------------|---------------------------|-------------|----------|----------|----------|
| CEP76        | <a href="#">113245893</a> | -3.0592673  | -1.61319 | 0.000589 | 0.002428 |
| RCC1         | <a href="#">113268413</a> | -3.06071026 | -1.61387 | 2.22E-05 | 0.000129 |
| LOC113271280 | <a href="#">113271280</a> | -3.06357696 | -1.61522 | 0.006826 | 0.020281 |
| TCHP         | <a href="#">113267096</a> | -3.06718498 | -1.61692 | 0.000381 | 0.00165  |
| PHACTR1      | <a href="#">113264462</a> | -3.06778276 | -1.6172  | 5.8E-05  | 0.000307 |
| SCML1        | <a href="#">113242261</a> | -3.07013377 | -1.6183  | 0.000222 | 0.001026 |
| JPT1         | <a href="#">113244646</a> | -3.0706027  | -1.61852 | 1.8E-05  | 0.000107 |
| FKBP5        | <a href="#">113243846</a> | -3.07123546 | -1.61882 | 0.000671 | 0.002721 |
| BID          | <a href="#">113258065</a> | -3.07233189 | -1.61933 | 4.66E-05 | 0.000251 |
| KCNN1        | <a href="#">113256697</a> | -3.07697772 | -1.62151 | 0.002123 | 0.007413 |
| ILK          | <a href="#">113245818</a> | -3.07790396 | -1.62195 | 0.000321 | 0.001418 |
| MARK2        | <a href="#">113244194</a> | -3.07971299 | -1.6228  | 5.67E-05 | 0.0003   |
| LGMN         | <a href="#">113267343</a> | -3.08072241 | -1.62327 | 0.000975 | 0.003766 |
| SEMA4F       | <a href="#">113243445</a> | -3.08256813 | -1.62413 | 3.12E-05 | 0.000174 |
| MAP3K5       | <a href="#">113259481</a> | -3.08427963 | -1.62493 | 0.000118 | 0.000583 |
| FBP1         | <a href="#">113269785</a> | -3.08545359 | -1.62548 | 0.00765  | 0.022332 |
| MOGS         | <a href="#">113243493</a> | -3.08755062 | -1.62646 | 1.92E-05 | 0.000113 |
| RCOR1        | <a href="#">113267236</a> | -3.08762232 | -1.6265  | 6.44E-05 | 0.000337 |
| CNOT6        | <a href="#">113261545</a> | -3.08773505 | -1.62655 | 0.000105 | 0.000526 |
| TPCN2        | <a href="#">113243987</a> | -3.0881054  | -1.62672 | 3.24E-05 | 0.000181 |
| TIRAP        | <a href="#">113259882</a> | -3.08838616 | -1.62685 | 7.09E-05 | 0.000368 |
| CHN2         | <a href="#">113262210</a> | -3.08849625 | -1.6269  | 0.001556 | 0.005672 |
| CASP10       | <a href="#">113250594</a> | -3.0939805  | -1.62946 | 0.000145 | 0.000697 |
| SEC61B       | <a href="#">113260404</a> | -3.09562774 | -1.63023 | 2.54E-05 | 0.000145 |
| NARF         | <a href="#">113244470</a> | -3.09729687 | -1.63101 | 0.000438 | 0.001861 |
| NUAK2        | <a href="#">113242489</a> | -3.09736702 | -1.63104 | 0.003084 | 0.010246 |
| OAT          | <a href="#">113252032</a> | -3.10060113 | -1.63255 | 0.000334 | 0.001468 |
| CD40         | <a href="#">113258674</a> | -3.10186013 | -1.63313 | 0.002791 | 0.009416 |

|              |                           |             |          |          |          |
|--------------|---------------------------|-------------|----------|----------|----------|
| AGAP2        | <a href="#">113256365</a> | -3.10192332 | -1.63316 | 0.001501 | 0.005504 |
| ARSB         | <a href="#">113255173</a> | -3.10224605 | -1.63331 | 1.75E-05 | 0.000104 |
| VAMP8        | <a href="#">113243140</a> | -3.10253771 | -1.63345 | 7.08E-05 | 0.000368 |
| GRK2         | <a href="#">113244040</a> | -3.10291645 | -1.63362 | 0.000878 | 0.003435 |
| CHP1         | <a href="#">113242012</a> | -3.1034644  | -1.63388 | 0.001157 | 0.004373 |
| UNC5A        | <a href="#">113264134</a> | -3.10487683 | -1.63454 | 0.000766 | 0.003053 |
| ADGRG7       | <a href="#">113250587</a> | -3.10687479 | -1.63546 | 0.009896 | 0.027654 |
| TDG          | <a href="#">113256064</a> | -3.10891701 | -1.63641 | 7.82E-05 | 0.000401 |
| TKFC         | <a href="#">113246914</a> | -3.10924512 | -1.63656 | 1.83E-05 | 0.000109 |
| GPR108       | <a href="#">113242887</a> | -3.11165969 | -1.63768 | 3.7E-06  | 2.55E-05 |
| SUCO         | <a href="#">113262826</a> | -3.11322708 | -1.63841 | 5.6E-05  | 0.000296 |
| MAN2A1       | <a href="#">113255007</a> | -3.11779176 | -1.64052 | 6.88E-05 | 0.000358 |
| LOC113267043 | <a href="#">113267043</a> | -3.12042254 | -1.64174 | 0.000442 | 0.001878 |
| ABCA6        | <a href="#">113265232</a> | -3.12530742 | -1.644   | 4.01E-05 | 0.000218 |
| CEP57        | <a href="#">113259811</a> | -3.12704482 | -1.6448  | 1.35E-05 | 8.24E-05 |
| PRIM2        | <a href="#">113261153</a> | -3.12784235 | -1.64517 | 4.15E-05 | 0.000226 |
| BMP2K        | <a href="#">113263235</a> | -3.12884139 | -1.64563 | 0.000252 | 0.001145 |
| C4BPA        | <a href="#">113242607</a> | -3.13181976 | -1.647   | 0.006544 | 0.019613 |
| ATP13A3      | <a href="#">113253389</a> | -3.13311132 | -1.6476  | 2.93E-05 | 0.000165 |
| MAD2L1BP     | <a href="#">113261255</a> | -3.13336306 | -1.64771 | 0.000331 | 0.001457 |
| TFPI         | <a href="#">113250680</a> | -3.13341201 | -1.64773 | 0.000277 | 0.001246 |
| UBE2S        | <a href="#">113247425</a> | -3.13517486 | -1.64855 | 0.000314 | 0.001392 |
| SHC4         | <a href="#">113269597</a> | -3.13669301 | -1.64924 | 0.00822  | 0.023687 |
| SPINT2       | <a href="#">113243624</a> | -3.13894885 | -1.65028 | 0.000154 | 0.000738 |
| ADORA1       | <a href="#">113242522</a> | -3.14101663 | -1.65123 | 0.019737 | 0.049737 |
| FAM216A      | <a href="#">113266961</a> | -3.14170981 | -1.65155 | 0.002715 | 0.009184 |
| RFC4         | <a href="#">113253907</a> | -3.14432625 | -1.65275 | 0.000136 | 0.000657 |
| SHMT2        | <a href="#">113256389</a> | -3.14551028 | -1.65329 | 3.31E-05 | 0.000184 |

|              |                           |             |          |          |          |
|--------------|---------------------------|-------------|----------|----------|----------|
| GMPPB        | <a href="#">113256885</a> | -3.14619245 | -1.65361 | 7.52E-05 | 0.000388 |
| PDCD4        | <a href="#">113251928</a> | -3.14674697 | -1.65386 | 0.000128 | 0.000625 |
| RAB39B       | <a href="#">113248333</a> | -3.1509963  | -1.65581 | 0.013175 | 0.035321 |
| BRPF1        | <a href="#">113257137</a> | -3.15501492 | -1.65765 | 7.18E-05 | 0.000372 |
| CCDC142      | <a href="#">113243499</a> | -3.15844281 | -1.65921 | 0.001216 | 0.004569 |
| NAGA         | <a href="#">113241706</a> | -3.16001918 | -1.65993 | 1.24E-05 | 7.69E-05 |
| ZSCAN25      | <a href="#">113267892</a> | -3.16161137 | -1.66066 | 0.004051 | 0.012953 |
| ITPK1        | <a href="#">113267338</a> | -3.16168131 | -1.66069 | 6.12E-06 | 4.05E-05 |
| CERS6        | <a href="#">113250813</a> | -3.16375006 | -1.66164 | 0.000192 | 0.000899 |
| USP6NL       | <a href="#">113241059</a> | -3.16628223 | -1.66279 | 9.08E-05 | 0.000459 |
| SH3BGRL3     | <a href="#">113268465</a> | -3.16687356 | -1.66306 | 6.69E-05 | 0.000349 |
| TMX1         | <a href="#">113266223</a> | -3.17116617 | -1.66501 | 8.19E-05 | 0.000419 |
| SRBD1        | <a href="#">113246176</a> | -3.17324606 | -1.66596 | 1.05E-05 | 6.62E-05 |
| B3GNT8       | <a href="#">113243533</a> | -3.17354185 | -1.66609 | 0.001152 | 0.004359 |
| LOC113246677 | <a href="#">113246677</a> | -3.17418132 | -1.66638 | 2.93E-06 | 2.06E-05 |
| RSPH3        | <a href="#">113259337</a> | -3.17585428 | -1.66714 | 0.005411 | 0.01667  |
| PIGQ         | <a href="#">113245379</a> | -3.17658138 | -1.66747 | 0.000164 | 0.000779 |
| FAM91A1      | <a href="#">113252750</a> | -3.17868076 | -1.66843 | 1.77E-05 | 0.000105 |
| PRR7         | <a href="#">113264154</a> | -3.17870391 | -1.66844 | 0.007143 | 0.021076 |
| INTS7        | <a href="#">113262669</a> | -3.17947317 | -1.66879 | 6.4E-05  | 0.000335 |
| TIGD2        | <a href="#">113263147</a> | -3.18095743 | -1.66946 | 3.05E-05 | 0.000171 |
| AOC2         | <a href="#">113265394</a> | -3.18442588 | -1.67103 | 7.17E-05 | 0.000372 |
| PTGIR        | <a href="#">113243392</a> | -3.1865215  | -1.67198 | 0.005683 | 0.017394 |
| KCTD12       | <a href="#">113251429</a> | -3.1876563  | -1.6725  | 0.005545 | 0.017027 |
| TEKT5        | <a href="#">113270804</a> | -3.18841585 | -1.67284 | 0.001531 | 0.005595 |
| FAM117B      | <a href="#">113250575</a> | -3.19023369 | -1.67366 | 0.000129 | 0.00063  |
| GTF3C3       | <a href="#">113250636</a> | -3.19121738 | -1.67411 | 4.18E-05 | 0.000227 |
| CUNH16orf58  | <a href="#">113267727</a> | -3.1968889  | -1.67667 | 9.36E-06 | 5.94E-05 |

|              |                           |             |          |          |          |
|--------------|---------------------------|-------------|----------|----------|----------|
| ACAP2        | <a href="#">113253318</a> | -3.19690332 | -1.67668 | 1.71E-05 | 0.000102 |
| ATP10D       | <a href="#">113262460</a> | -3.19708525 | -1.67676 | 3.73E-05 | 0.000205 |
| CBX4         | <a href="#">113244543</a> | -3.19760266 | -1.67699 | 0.00041  | 0.001759 |
| CERS2        | <a href="#">113246156</a> | -3.19919781 | -1.67771 | 1.76E-05 | 0.000104 |
| FGL1         | <a href="#">113262155</a> | -3.19920223 | -1.67771 | 8.84E-05 | 0.000449 |
| MAPRE1       | <a href="#">113258485</a> | -3.19958149 | -1.67788 | 1.33E-05 | 8.17E-05 |
| RAB7B        | <a href="#">113242471</a> | -3.19983406 | -1.678   | 0.01246  | 0.033652 |
| HGF          | <a href="#">113259246</a> | -3.20027956 | -1.6782  | 0.001514 | 0.00554  |
| KIAA1147     | <a href="#">113265223</a> | -3.20282734 | -1.67935 | 0.000231 | 0.001058 |
| SUN2         | <a href="#">113241768</a> | -3.20439939 | -1.68005 | 0.001076 | 0.004102 |
| SEC61A1      | <a href="#">113257265</a> | -3.20550966 | -1.68055 | 0.000931 | 0.003618 |
| TREX2        | <a href="#">113247856</a> | -3.20630553 | -1.68091 | 0.003737 | 0.012089 |
| NR1H3        | <a href="#">113264967</a> | -3.21211495 | -1.68352 | 0.000679 | 0.002751 |
| LOC113246261 | <a href="#">113246261</a> | -3.21274904 | -1.68381 | 0.000345 | 0.001511 |
| LRRCC1       | <a href="#">113252991</a> | -3.21590634 | -1.68523 | 2.63E-06 | 1.86E-05 |
| SLC20A1      | <a href="#">113242501</a> | -3.21743172 | -1.68591 | 0.000322 | 0.001422 |
| CMPK2        | <a href="#">113269399</a> | -3.21830337 | -1.6863  | 0.000172 | 0.000818 |
| STEAP4       | <a href="#">113259574</a> | -3.21859173 | -1.68643 | 0.000134 | 0.000649 |
| TP53INP1     | <a href="#">113252917</a> | -3.22072927 | -1.68739 | 0.000118 | 0.00058  |
| CCDC170      | <a href="#">113259566</a> | -3.22348905 | -1.68862 | 0.00011  | 0.000546 |
| UNC13D       | <a href="#">113244621</a> | -3.22537686 | -1.68947 | 0.005521 | 0.016977 |
| UHRF1BP1L    | <a href="#">113256105</a> | -3.22572922 | -1.68963 | 2.28E-05 | 0.000132 |
| CEBPD        | <a href="#">113268122</a> | -3.22881956 | -1.69101 | 0.000162 | 0.000773 |
| STAT2        | <a href="#">113256419</a> | -3.23110346 | -1.69203 | 1.14E-05 | 7.09E-05 |
| RAB19        | <a href="#">113265067</a> | -3.2335464  | -1.69312 | 0.012827 | 0.034559 |
| CNPY3        | <a href="#">113261285</a> | -3.23581691 | -1.69413 | 1.67E-05 | 9.99E-05 |
| SMPD5        | <a href="#">113247627</a> | -3.23621117 | -1.69431 | 0.001165 | 0.004399 |
| ULK4         | <a href="#">113253814</a> | -3.23631618 | -1.69435 | 0.000242 | 0.001102 |

|              |                           |             |          |          |          |
|--------------|---------------------------|-------------|----------|----------|----------|
| IL6R         | <a href="#">113245310</a> | -3.23727906 | -1.69478 | 0.000157 | 0.000749 |
| SMC3         | <a href="#">113251924</a> | -3.24144399 | -1.69664 | 0.000273 | 0.001229 |
| FAM102A      | <a href="#">113266447</a> | -3.24168286 | -1.69674 | 0.000239 | 0.001091 |
| LOC113250012 | <a href="#">113250012</a> | -3.24257634 | -1.69714 | 0.005745 | 0.017561 |
| ARHGAP25     | <a href="#">113244661</a> | -3.24407774 | -1.69781 | 5.29E-05 | 0.000282 |
| HYAL1        | <a href="#">113256908</a> | -3.24865951 | -1.69984 | 0.000464 | 0.00196  |
| PPIL1        | <a href="#">113243869</a> | -3.24890776 | -1.69995 | 1.54E-05 | 9.3E-05  |
| HAUS8        | <a href="#">113256663</a> | -3.25108971 | -1.70092 | 8.31E-05 | 0.000425 |
| TLN1         | <a href="#">113260465</a> | -3.25364226 | -1.70206 | 0.013517 | 0.036079 |
| CFLAR        | <a href="#">113250596</a> | -3.25568264 | -1.70296 | 2.55E-05 | 0.000146 |
| RECQL        | <a href="#">113257809</a> | -3.25940138 | -1.70461 | 2.41E-05 | 0.000138 |
| DAPK1        | <a href="#">113269788</a> | -3.26206549 | -1.70579 | 0.003228 | 0.010653 |
| LOC113257855 | <a href="#">113257855</a> | -3.26230309 | -1.70589 | 9.38E-06 | 5.95E-05 |
| KIF22        | <a href="#">113267670</a> | -3.26405603 | -1.70667 | 7.75E-05 | 0.000398 |
| GJD3         | <a href="#">113265489</a> | -3.26493274 | -1.70705 | 0.003231 | 0.010657 |
| RB1          | <a href="#">113251325</a> | -3.26669544 | -1.70783 | 0.000149 | 0.000715 |
| NUBP1        | <a href="#">113270807</a> | -3.26872904 | -1.70873 | 4.28E-06 | 2.92E-05 |
| F2RL3        | <a href="#">113256662</a> | -3.2711304  | -1.70979 | 0.011375 | 0.031136 |
| KCNAB3       | <a href="#">113271148</a> | -3.27823976 | -1.71292 | 0.006237 | 0.01884  |
| STK17B       | <a href="#">113250640</a> | -3.27851745 | -1.71304 | 0.000795 | 0.003149 |
| IRF1         | <a href="#">113261712</a> | -3.27903276 | -1.71327 | 6.29E-06 | 4.16E-05 |
| XDH          | <a href="#">113240940</a> | -3.2818721  | -1.71452 | 0.005268 | 0.016301 |
| PQLC3        | <a href="#">113269928</a> | -3.28447175 | -1.71566 | 4.42E-05 | 0.000239 |
| MGAT4A       | <a href="#">113246802</a> | -3.28939528 | -1.71782 | 0.000905 | 0.00353  |
| PTBP1        | <a href="#">113242704</a> | -3.28964301 | -1.71793 | 0.000746 | 0.002987 |
| FANCE        | <a href="#">113243843</a> | -3.28969556 | -1.71795 | 0.001408 | 0.005197 |
| AP3B2        | <a href="#">113263743</a> | -3.29044752 | -1.71828 | 0.002009 | 0.007062 |
| MYH9         | <a href="#">113255994</a> | -3.29226815 | -1.71908 | 0.017115 | 0.044119 |

|              |                           |             |          |          |          |
|--------------|---------------------------|-------------|----------|----------|----------|
| INHBA        | <a href="#">113258079</a> | -3.29258809 | -1.71922 | 0.019011 | 0.048221 |
| SESN2        | <a href="#">113268419</a> | -3.2929895  | -1.7194  | 0.004047 | 0.012944 |
| TMTC4        | <a href="#">113251505</a> | -3.2931891  | -1.71949 | 0.000624 | 0.002548 |
| STAB1        | <a href="#">113256956</a> | -3.29649841 | -1.72093 | 5.52E-05 | 0.000293 |
| MDGA1        | <a href="#">113243883</a> | -3.29906968 | -1.72206 | 0.009109 | 0.025817 |
| SCN5A        | <a href="#">113253790</a> | -3.29998938 | -1.72246 | 0.007209 | 0.021242 |
| NID2         | <a href="#">113242379</a> | -3.30302678 | -1.72379 | 0.004382 | 0.013849 |
| CAPN15       | <a href="#">113245375</a> | -3.30601891 | -1.72509 | 2.64E-05 | 0.000151 |
| ADAM12       | <a href="#">113252043</a> | -3.30793476 | -1.72593 | 0.017309 | 0.044518 |
| PPT1         | <a href="#">113268238</a> | -3.30796979 | -1.72595 | 4.7E-06  | 3.19E-05 |
| EFCAB11      | <a href="#">113267372</a> | -3.30998405 | -1.72682 | 0.001562 | 0.00569  |
| ELL2         | <a href="#">113255072</a> | -3.31011359 | -1.72688 | 1.4E-06  | 1.04E-05 |
| PYGB         | <a href="#">113248361</a> | -3.31484283 | -1.72894 | 2.21E-05 | 0.000128 |
| ESYT1        | <a href="#">113256437</a> | -3.32193716 | -1.73202 | 0.00033  | 0.001453 |
| LOC113270441 | <a href="#">113270441</a> | -3.32448725 | -1.73313 | 0.002978 | 0.009964 |
| TMED8        | <a href="#">113270291</a> | -3.32484321 | -1.73329 | 1.1E-05  | 6.87E-05 |
| ADA          | <a href="#">113258634</a> | -3.32519005 | -1.73344 | 2.53E-05 | 0.000145 |
| ACTG1        | <a href="#">113244519</a> | -3.32810878 | -1.7347  | 0.016582 | 0.042924 |
| DFFB         | <a href="#">113270585</a> | -3.32983599 | -1.73545 | 0.001087 | 0.004138 |
| PNKP         | <a href="#">113243279</a> | -3.33119395 | -1.73604 | 2.3E-05  | 0.000133 |
| LOC113243704 | <a href="#">113243704</a> | -3.33206479 | -1.73642 | 0.012029 | 0.032683 |
| ATP6AP2      | <a href="#">113265872</a> | -3.33666642 | -1.73841 | 8.07E-06 | 5.2E-05  |
| CARD11       | <a href="#">113267978</a> | -3.337599   | -1.73881 | 0.001479 | 0.005428 |
| PARVB        | <a href="#">113241671</a> | -3.33916242 | -1.73949 | 0.001296 | 0.004834 |
| CREB3L1      | <a href="#">113264990</a> | -3.34039503 | -1.74002 | 0.00967  | 0.02716  |
| HAUS7        | <a href="#">113247855</a> | -3.34056165 | -1.74009 | 0.000427 | 0.00182  |
| CCDC150      | <a href="#">113250637</a> | -3.34162009 | -1.74055 | 0.009038 | 0.025648 |
| LOC113248623 | <a href="#">113248623</a> | -3.34229234 | -1.74084 | 0.001652 | 0.005969 |

|              |                           |             |          |          |          |
|--------------|---------------------------|-------------|----------|----------|----------|
| HAUS2        | <a href="#">113241985</a> | -3.34736956 | -1.74303 | 0.000505 | 0.002119 |
| NEU1         | <a href="#">113243747</a> | -3.34794645 | -1.74328 | 2.09E-05 | 0.000122 |
| CDKN2D       | <a href="#">113242994</a> | -3.34905122 | -1.74375 | 0.000828 | 0.00327  |
| ANAPC1       | <a href="#">113242372</a> | -3.35012998 | -1.74422 | 0.000149 | 0.000716 |
| TBC1D2B      | <a href="#">113263575</a> | -3.35207852 | -1.74506 | 6.42E-05 | 0.000336 |
| DDX39A       | <a href="#">113247151</a> | -3.3575326  | -1.7474  | 0.000108 | 0.000536 |
| LOC113251291 | <a href="#">113251291</a> | -3.3621949  | -1.7494  | 0.005205 | 0.016143 |
| HCAR1        | <a href="#">113266918</a> | -3.36356239 | -1.74999 | 0.005386 | 0.016621 |
| ZBTB34       | <a href="#">113266420</a> | -3.36423753 | -1.75028 | 8.7E-05  | 0.000443 |
| CCDC112      | <a href="#">113261601</a> | -3.36932309 | -1.75246 | 0.000441 | 0.001872 |
| PDE3B        | <a href="#">113246251</a> | -3.37173416 | -1.75349 | 1.9E-05  | 0.000112 |
| CDH16        | <a href="#">113252336</a> | -3.37866495 | -1.75645 | 0.000586 | 0.002414 |
| PDIA3        | <a href="#">113241953</a> | -3.37967043 | -1.75688 | 0.000407 | 0.001748 |
| TLR2         | <a href="#">113255769</a> | -3.37968442 | -1.75689 | 0.000432 | 0.00184  |
| KIAA0556     | <a href="#">113267614</a> | -3.38038751 | -1.75719 | 6.61E-06 | 4.34E-05 |
| RIPK1        | <a href="#">113264397</a> | -3.38180241 | -1.75779 | 6.68E-06 | 4.39E-05 |
| RAP2A        | <a href="#">113251482</a> | -3.38279036 | -1.75821 | 9.29E-06 | 5.91E-05 |
| LOC113256790 | <a href="#">113256790</a> | -3.38632485 | -1.75972 | 0.002017 | 0.007084 |
| PTMA         | <a href="#">113250347</a> | -3.38772559 | -1.76032 | 0.011041 | 0.030349 |
| DES11        | <a href="#">113241723</a> | -3.38897336 | -1.76085 | 1.12E-05 | 7.02E-05 |
| CDKN2C       | <a href="#">113254692</a> | -3.39238881 | -1.7623  | 2.29E-06 | 1.63E-05 |
| MMP23B       | <a href="#">113270624</a> | -3.3938363  | -1.76292 | 0.008479 | 0.024315 |
| GSAP         | <a href="#">113259069</a> | -3.39458506 | -1.76324 | 3.39E-05 | 0.000188 |
| TPST2        | <a href="#">113244992</a> | -3.39557546 | -1.76366 | 6.21E-06 | 4.11E-05 |
| PML          | <a href="#">113240956</a> | -3.39736885 | -1.76442 | 2.01E-06 | 1.45E-05 |
| NUDT5        | <a href="#">113241068</a> | -3.39816704 | -1.76476 | 0.000383 | 0.00166  |
| SMC6         | <a href="#">113270140</a> | -3.40318778 | -1.76689 | 1.08E-05 | 6.75E-05 |
| WNK4         | <a href="#">113265400</a> | -3.4034438  | -1.767   | 0.000405 | 0.001742 |

|              |                           |             |          |          |          |
|--------------|---------------------------|-------------|----------|----------|----------|
| PHKG2        | <a href="#">113267697</a> | -3.4042041  | -1.76732 | 5.76E-06 | 3.83E-05 |
| LOC113256263 | <a href="#">113256263</a> | -3.40577959 | -1.76799 | 2.22E-05 | 0.000129 |
| ZNF518B      | <a href="#">113266679</a> | -3.40706631 | -1.76853 | 7.34E-05 | 0.00038  |
| SKP2         | <a href="#">113260895</a> | -3.40722338 | -1.7686  | 7.42E-05 | 0.000383 |
| TMEM8A       | <a href="#">113245368</a> | -3.40875216 | -1.76924 | 6.98E-06 | 4.57E-05 |
| SLC19A1      | <a href="#">113242695</a> | -3.41000477 | -1.76977 | 9.45E-06 | 5.99E-05 |
| TIMP1        | <a href="#">113265992</a> | -3.41044453 | -1.76996 | 0.000186 | 0.000873 |
| NUDT1        | <a href="#">113247716</a> | -3.41419177 | -1.77154 | 0.00041  | 0.001758 |
| OFD1         | <a href="#">113240718</a> | -3.41675314 | -1.77263 | 0.000252 | 0.001142 |
| PDP2         | <a href="#">113252337</a> | -3.4176578  | -1.77301 | 0.000303 | 0.001351 |
| TP73         | <a href="#">113270591</a> | -3.41939091 | -1.77374 | 0.003813 | 0.012302 |
| SYCE1        | <a href="#">113252112</a> | -3.42519073 | -1.77618 | 0.003304 | 0.010878 |
| SGPL1        | <a href="#">113259146</a> | -3.42608362 | -1.77656 | 3.07E-06 | 2.14E-05 |
| SLC25A6      | <a href="#">113240791</a> | -3.42908351 | -1.77782 | 0.006636 | 0.019828 |
| ENPP2        | <a href="#">113252777</a> | -3.42976069 | -1.77811 | 0.000325 | 0.001436 |
| CASP3        | <a href="#">113262259</a> | -3.4299199  | -1.77817 | 1.78E-06 | 1.3E-05  |
| GK           | <a href="#">113265832</a> | -3.43225888 | -1.77916 | 0.000186 | 0.000875 |
| LOC113249507 | <a href="#">113249507</a> | -3.43269543 | -1.77934 | 0.000389 | 0.001681 |
| FBXO4        | <a href="#">113260940</a> | -3.43829762 | -1.78169 | 0.000624 | 0.002548 |
| LOC113257773 | <a href="#">113257773</a> | -3.43981201 | -1.78233 | 1.58E-05 | 9.52E-05 |
| FLNA         | <a href="#">113247826</a> | -3.44011402 | -1.78246 | 0.014033 | 0.037291 |
| SLC35E3      | <a href="#">113256297</a> | -3.44017577 | -1.78248 | 1.5E-05  | 9.03E-05 |
| PFAS         | <a href="#">113271180</a> | -3.44256336 | -1.78348 | 2.89E-05 | 0.000164 |
| ABCC10       | <a href="#">113261265</a> | -3.44257711 | -1.78349 | 0.000127 | 0.000619 |
| EFCAB14      | <a href="#">113254712</a> | -3.44262134 | -1.78351 | 0.000301 | 0.001341 |
| CPD          | <a href="#">113269090</a> | -3.44483259 | -1.78443 | 0.001058 | 0.004042 |
| ANKRD50      | <a href="#">113255646</a> | -3.44597295 | -1.78491 | 0.000295 | 0.001318 |
| ARPC4        | <a href="#">113257149</a> | -3.4459897  | -1.78492 | 2E-06    | 1.44E-05 |

|              |                           |             |          |          |          |
|--------------|---------------------------|-------------|----------|----------|----------|
| PPP1R15B     | <a href="#">113242504</a> | -3.44690772 | -1.7853  | 6.32E-05 | 0.000332 |
| ADAMTS6      | <a href="#">113255284</a> | -3.4482335  | -1.78586 | 0.000707 | 0.00285  |
| LOC113263111 | <a href="#">113263111</a> | -3.4497327  | -1.78648 | 0.000525 | 0.002191 |
| RFWD3        | <a href="#">113252487</a> | -3.45167603 | -1.7873  | 1.58E-05 | 9.52E-05 |
| MPND         | <a href="#">113242830</a> | -3.45236221 | -1.78758 | 1.91E-06 | 1.39E-05 |
| PRKACB       | <a href="#">113254486</a> | -3.4563818  | -1.78926 | 2.57E-06 | 1.82E-05 |
| RIN3         | <a href="#">113267346</a> | -3.45874153 | -1.79025 | 2.51E-05 | 0.000144 |
| NIPSNAP3A    | <a href="#">113260370</a> | -3.45948933 | -1.79056 | 3.86E-05 | 0.000212 |
| WDR78        | <a href="#">113254555</a> | -3.46096198 | -1.79117 | 0.000825 | 0.003256 |
| FAM84B       | <a href="#">113252730</a> | -3.46282229 | -1.79195 | 0.000354 | 0.001544 |
| SYT12        | <a href="#">113244043</a> | -3.4632921  | -1.79214 | 0.000875 | 0.003428 |
| SLC1A4       | <a href="#">113244860</a> | -3.46411708 | -1.79249 | 0.000563 | 0.00233  |
| TMEM120A     | <a href="#">113267809</a> | -3.46439408 | -1.7926  | 5.72E-06 | 3.81E-05 |
| B2M          | <a href="#">113241942</a> | -3.46528172 | -1.79297 | 0.012397 | 0.033527 |
| S1PR5        | <a href="#">113242990</a> | -3.46548378 | -1.79306 | 0.001979 | 0.006966 |
| TBC1D24      | <a href="#">113245095</a> | -3.46822141 | -1.7942  | 0.000321 | 0.001417 |
| RRM1         | <a href="#">113269248</a> | -3.46878227 | -1.79443 | 3.83E-05 | 0.00021  |
| MAN2B1       | <a href="#">113247191</a> | -3.4754864  | -1.79721 | 0.000954 | 0.003699 |
| POLR3G       | <a href="#">113255112</a> | -3.47635265 | -1.79757 | 0.002461 | 0.008425 |
| MCPH1        | <a href="#">113262189</a> | -3.47793038 | -1.79823 | 2.62E-05 | 0.00015  |
| PIEZO1       | <a href="#">113252145</a> | -3.47824998 | -1.79836 | 0.000527 | 0.002196 |
| LOC113243093 | <a href="#">113243093</a> | -3.4834828  | -1.80053 | 0.004859 | 0.015196 |
| PDIA5        | <a href="#">113252317</a> | -3.48399014 | -1.80074 | 1.17E-05 | 7.26E-05 |
| FBH1         | <a href="#">113241138</a> | -3.48554656 | -1.80138 | 6.49E-05 | 0.000339 |
| ZNF800       | <a href="#">113263694</a> | -3.48612226 | -1.80162 | 8.37E-05 | 0.000427 |
| HNRNPF       | <a href="#">113243139</a> | -3.48720374 | -1.80207 | 0.000862 | 0.003387 |
| LOC113260431 | <a href="#">113260431</a> | -3.48808613 | -1.80244 | 0.004158 | 0.013252 |
| PGM2         | <a href="#">113262400</a> | -3.48925744 | -1.80292 | 3.1E-06  | 2.16E-05 |

|              |                           |             |          |          |          |
|--------------|---------------------------|-------------|----------|----------|----------|
| FLRT3        | <a href="#">113258157</a> | -3.49033812 | -1.80337 | 0.006277 | 0.018944 |
| LOC113258957 | <a href="#">113258957</a> | -3.49199357 | -1.80405 | 4.69E-05 | 0.000252 |
| KCNK6        | <a href="#">113243621</a> | -3.49300577 | -1.80447 | 0.000331 | 0.001457 |
| SLC16A4      | <a href="#">113244906</a> | -3.49640022 | -1.80587 | 0.006248 | 0.01887  |
| SMIM3        | <a href="#">113263960</a> | -3.4973536  | -1.80626 | 0.001097 | 0.004173 |
| FAS          | <a href="#">113258968</a> | -3.50199345 | -1.80818 | 0.000516 | 0.00216  |
| LTC4S        | <a href="#">113261556</a> | -3.5030569  | -1.80861 | 0.000938 | 0.003642 |
| RNF24        | <a href="#">113258391</a> | -3.506277   | -1.80994 | 0.001229 | 0.004612 |
| BTLA         | <a href="#">113251284</a> | -3.50799962 | -1.81065 | 0.002045 | 0.00717  |
| TMEM50B      | <a href="#">113264480</a> | -3.50960593 | -1.81131 | 4.77E-06 | 3.23E-05 |
| TTYH3        | <a href="#">113247736</a> | -3.51067719 | -1.81175 | 7.08E-06 | 4.62E-05 |
| DNAH14       | <a href="#">113262629</a> | -3.51108437 | -1.81192 | 0.003929 | 0.012603 |
| INKA1        | <a href="#">113256888</a> | -3.51863039 | -1.81501 | 0.000122 | 0.000599 |
| ATG16L2      | <a href="#">113269279</a> | -3.51874363 | -1.81506 | 2.09E-05 | 0.000122 |
| CD38         | <a href="#">113266704</a> | -3.52098759 | -1.81598 | 0.000143 | 0.000688 |
| NUPR1        | <a href="#">113267638</a> | -3.52638886 | -1.81819 | 0.012412 | 0.033549 |
| ANKRD35      | <a href="#">113247781</a> | -3.52723736 | -1.81854 | 0.000315 | 0.001394 |
| SAMD15       | <a href="#">113270287</a> | -3.52842461 | -1.81902 | 0.002563 | 0.008731 |
| MCM7         | <a href="#">113267879</a> | -3.52892156 | -1.81923 | 0.000197 | 0.000917 |
| LOC113247684 | <a href="#">113247684</a> | -3.52959013 | -1.8195  | 0.000684 | 0.002766 |
| NUP205       | <a href="#">113264561</a> | -3.52992797 | -1.81964 | 2.46E-06 | 1.75E-05 |
| EPB41L3      | <a href="#">113253238</a> | -3.53058937 | -1.81991 | 0.000104 | 0.000519 |
| LOC113261708 | <a href="#">113261708</a> | -3.5323424  | -1.82063 | 0.000134 | 0.00065  |
| TIAM1        | <a href="#">113266710</a> | -3.53282914 | -1.82082 | 0.000139 | 0.000673 |
| DERA         | <a href="#">113257842</a> | -3.53362639 | -1.82115 | 3.69E-05 | 0.000204 |
| SEC23B       | <a href="#">113258310</a> | -3.53585753 | -1.82206 | 3.62E-06 | 2.5E-05  |
| LOC113241453 | <a href="#">113241453</a> | -3.53869338 | -1.82322 | 0.004766 | 0.014941 |
| SLC35C1      | <a href="#">113265000</a> | -3.5414615  | -1.82434 | 1.8E-05  | 0.000107 |

|              |                           |             |          |          |          |
|--------------|---------------------------|-------------|----------|----------|----------|
| FGD4         | <a href="#">113257743</a> | -3.54267873 | -1.82484 | 4.52E-07 | 3.67E-06 |
| AS3MT        | <a href="#">113251882</a> | -3.54295422 | -1.82495 | 0.000196 | 0.000914 |
| CHFR         | <a href="#">113266833</a> | -3.54333784 | -1.82511 | 1.15E-05 | 7.16E-05 |
| FAM241A      | <a href="#">113255577</a> | -3.54373148 | -1.82527 | 1.74E-06 | 1.27E-05 |
| CUNH3orf62   | <a href="#">113256870</a> | -3.54396973 | -1.82537 | 0.000199 | 0.000926 |
| LOC113264260 | <a href="#">113264260</a> | -3.54457978 | -1.82561 | 0.011646 | 0.031795 |
| IMPDH1       | <a href="#">113263791</a> | -3.54881607 | -1.82734 | 1.89E-06 | 1.37E-05 |
| EFHC2        | <a href="#">113265902</a> | -3.54882785 | -1.82734 | 0.004505 | 0.014197 |
| ERGIC1       | <a href="#">113264097</a> | -3.55296185 | -1.82902 | 6.92E-06 | 4.53E-05 |
| SUZ12        | <a href="#">113268999</a> | -3.55329768 | -1.82916 | 8.56E-06 | 5.49E-05 |
| XPR1         | <a href="#">113262704</a> | -3.55919692 | -1.83155 | 7.97E-06 | 5.15E-05 |
| LOC113246021 | <a href="#">113246021</a> | -3.56064052 | -1.83214 | 0.001282 | 0.004789 |
| LOC113259257 | <a href="#">113259257</a> | -3.56117993 | -1.83236 | 0.017385 | 0.04468  |
| MAOB         | <a href="#">113265900</a> | -3.56134079 | -1.83242 | 0.002198 | 0.007649 |
| PTGDR        | <a href="#">113242377</a> | -3.56258951 | -1.83293 | 0.00547  | 0.01684  |
| SLC9A1       | <a href="#">113268442</a> | -3.56356951 | -1.83332 | 4.76E-07 | 3.85E-06 |
| TIPIN        | <a href="#">113240884</a> | -3.56391566 | -1.83346 | 7.38E-05 | 0.000382 |
| EBI3         | <a href="#">113242825</a> | -3.56637846 | -1.83446 | 0.008236 | 0.023723 |
| NEK6         | <a href="#">113266394</a> | -3.56705581 | -1.83473 | 1.93E-05 | 0.000114 |
| LIPC         | <a href="#">113269678</a> | -3.56812288 | -1.83517 | 0.010361 | 0.028783 |
| SAMHD1       | <a href="#">113258570</a> | -3.5766983  | -1.83863 | 6.76E-06 | 4.43E-05 |
| DZIP1L       | <a href="#">113253977</a> | -3.57747564 | -1.83894 | 0.002816 | 0.009484 |
| TMEM173      | <a href="#">113261804</a> | -3.57765955 | -1.83902 | 0.000254 | 0.00115  |
| PLCXD1       | <a href="#">113240798</a> | -3.57933931 | -1.83969 | 0.001615 | 0.005849 |
| ZYX          | <a href="#">113265542</a> | -3.58140584 | -1.84053 | 0.000309 | 0.001375 |
| STUM         | <a href="#">113262927</a> | -3.58360159 | -1.84141 | 0.000775 | 0.003087 |
| VSIR         | <a href="#">113259153</a> | -3.5858778  | -1.84233 | 0.000441 | 0.001872 |
| PRR5L        | <a href="#">113265030</a> | -3.58969269 | -1.84386 | 0.001541 | 0.005625 |

|              |                           |             |          |          |          |
|--------------|---------------------------|-------------|----------|----------|----------|
| FEN1         | <a href="#">113246985</a> | -3.59014742 | -1.84404 | 1.82E-05 | 0.000108 |
| KBTBD7       | <a href="#">113251380</a> | -3.59035216 | -1.84413 | 0.000381 | 0.001652 |
| HSP90B1      | <a href="#">113256067</a> | -3.5911366  | -1.84444 | 0.001105 | 0.004197 |
| NT5C3B       | <a href="#">113265444</a> | -3.59119986 | -1.84447 | 4.99E-06 | 3.36E-05 |
| WIPF1        | <a href="#">113250755</a> | -3.59254902 | -1.84501 | 6.3E-05  | 0.000331 |
| PIBF1        | <a href="#">113251417</a> | -3.59712953 | -1.84685 | 0.000849 | 0.003341 |
| TNFRSF21     | <a href="#">113261226</a> | -3.59773846 | -1.84709 | 7.07E-06 | 4.62E-05 |
| LOC113248453 | <a href="#">113248453</a> | -3.59968882 | -1.84787 | 9.09E-07 | 6.99E-06 |
| SLC12A6      | <a href="#">113242080</a> | -3.60449289 | -1.8498  | 0.000415 | 0.001775 |
| UBE2O        | <a href="#">113244596</a> | -3.60710847 | -1.85084 | 0.000755 | 0.003017 |
| SLAMF9       | <a href="#">113246664</a> | -3.60881619 | -1.85153 | 0.000964 | 0.003727 |
| PDCL         | <a href="#">113266380</a> | -3.61343722 | -1.85337 | 7.38E-06 | 4.81E-05 |
| MYC          | <a href="#">113252726</a> | -3.61657344 | -1.85462 | 1.21E-05 | 7.51E-05 |
| AZIN2        | <a href="#">113268335</a> | -3.61799292 | -1.85519 | 1.21E-05 | 7.51E-05 |
| EZR          | <a href="#">113259607</a> | -3.62041201 | -1.85615 | 0.000242 | 0.001101 |
| GMCL1        | <a href="#">113244505</a> | -3.62105151 | -1.85641 | 2.98E-05 | 0.000168 |
| PTBP3        | <a href="#">113260634</a> | -3.62352278 | -1.85739 | 3.14E-05 | 0.000175 |
| ACTR2        | <a href="#">113244810</a> | -3.62840499 | -1.85934 | 0.000981 | 0.003782 |
| NOL4L        | <a href="#">113258480</a> | -3.63134185 | -1.8605  | 2.23E-05 | 0.000129 |
| MARC1        | <a href="#">113268719</a> | -3.63298124 | -1.86115 | 0.009254 | 0.026183 |
| TOP1         | <a href="#">113258607</a> | -3.63334571 | -1.8613  | 7.39E-05 | 0.000382 |
| GRAMD1A      | <a href="#">113244767</a> | -3.63344038 | -1.86134 | 0.000192 | 0.000896 |
| ATP6V0B      | <a href="#">113254775</a> | -3.63993463 | -1.86391 | 8.34E-07 | 6.45E-06 |
| SVIP         | <a href="#">113265104</a> | -3.64103001 | -1.86435 | 6.62E-05 | 0.000346 |
| LHFPL2       | <a href="#">113255174</a> | -3.64324537 | -1.86522 | 6.04E-06 | 4.01E-05 |
| CTPS1        | <a href="#">113254822</a> | -3.64710436 | -1.86675 | 2.1E-05  | 0.000122 |
| AP1S1        | <a href="#">113267838</a> | -3.64828067 | -1.86722 | 7.87E-06 | 5.1E-05  |
| RAD9A        | <a href="#">113244032</a> | -3.64903665 | -1.86752 | 1.27E-06 | 9.46E-06 |

|              |                           |             |          |          |          |
|--------------|---------------------------|-------------|----------|----------|----------|
| REC8         | <a href="#">113245986</a> | -3.64929589 | -1.86762 | 0.000456 | 0.001929 |
| TMSB4X       | <a href="#">113240727</a> | -3.6512328  | -1.86838 | 0.009029 | 0.025627 |
| ESYT3        | <a href="#">113253985</a> | -3.65386274 | -1.86942 | 0.00056  | 0.00232  |
| E2F4         | <a href="#">113252353</a> | -3.66132014 | -1.87236 | 8.14E-06 | 5.24E-05 |
| MBOAT7       | <a href="#">113247398</a> | -3.66648793 | -1.8744  | 2.86E-06 | 2.01E-05 |
| SFXN1        | <a href="#">113264117</a> | -3.67144518 | -1.87635 | 1.92E-06 | 1.39E-05 |
| NUCB2        | <a href="#">113246624</a> | -3.67311195 | -1.877   | 5.65E-06 | 3.76E-05 |
| SORL1        | <a href="#">113259938</a> | -3.67422333 | -1.87744 | 1.32E-06 | 9.78E-06 |
| LRRC27       | <a href="#">113252077</a> | -3.67703452 | -1.87854 | 0.000212 | 0.000982 |
| PLOD2        | <a href="#">113254030</a> | -3.67705448 | -1.87855 | 1.63E-05 | 9.78E-05 |
| ZNF711       | <a href="#">113242165</a> | -3.68091257 | -1.88006 | 0.009025 | 0.025626 |
| PPM1M        | <a href="#">113256945</a> | -3.68182073 | -1.88042 | 4.63E-07 | 3.75E-06 |
| ABCB4        | <a href="#">113259445</a> | -3.68655311 | -1.88227 | 0.001543 | 0.005632 |
| ALG14        | <a href="#">113254379</a> | -3.69200539 | -1.8844  | 0.000178 | 0.000843 |
| LOC113265643 | <a href="#">113265643</a> | -3.69334709 | -1.88493 | 4.21E-06 | 2.88E-05 |
| SMCHD1       | <a href="#">113253255</a> | -3.69352934 | -1.885   | 5.2E-05  | 0.000278 |
| RHPN1        | <a href="#">113247654</a> | -3.6953748  | -1.88572 | 0.00981  | 0.027483 |
| CALR         | <a href="#">113247206</a> | -3.69988861 | -1.88748 | 0.000901 | 0.003514 |
| CDK2AP2      | <a href="#">113244021</a> | -3.70112669 | -1.88796 | 3.54E-07 | 2.93E-06 |
| LRP11        | <a href="#">113259551</a> | -3.70594824 | -1.88984 | 0.000101 | 0.000508 |
| TLR6         | <a href="#">113262410</a> | -3.71187547 | -1.89215 | 1.49E-05 | 8.97E-05 |
| EML2         | <a href="#">113243421</a> | -3.71307129 | -1.89261 | 8.04E-06 | 5.18E-05 |
| CPNE2        | <a href="#">113252272</a> | -3.7180709  | -1.89455 | 2.23E-06 | 1.59E-05 |
| ARMC9        | <a href="#">113250357</a> | -3.72076191 | -1.8956  | 1.7E-05  | 0.000101 |
| KIAA0513     | <a href="#">113252185</a> | -3.72097271 | -1.89568 | 0.000224 | 0.001031 |
| FUCA1        | <a href="#">113268513</a> | -3.72735774 | -1.89815 | 1.52E-06 | 1.12E-05 |
| PPIA         | <a href="#">113257787</a> | -3.72841604 | -1.89856 | 0.00043  | 0.001833 |
| GSR          | <a href="#">113262134</a> | -3.72933399 | -1.89892 | 1.39E-06 | 1.03E-05 |

|              |                           |             |          |          |          |
|--------------|---------------------------|-------------|----------|----------|----------|
| LOC113246311 | <a href="#">113246311</a> | -3.73031429 | -1.8993  | 0.002584 | 0.008787 |
| MYO9B        | <a href="#">113256664</a> | -3.73117769 | -1.89963 | 8.89E-05 | 0.000451 |
| ADAMTS14     | <a href="#">113258879</a> | -3.73371668 | -1.90061 | 0.000522 | 0.002181 |
| RHBDF2       | <a href="#">113244595</a> | -3.73404197 | -1.90074 | 9.14E-06 | 5.82E-05 |
| ZC3HAV1      | <a href="#">113264867</a> | -3.73409439 | -1.90076 | 9.31E-07 | 7.15E-06 |
| SLC25A10     | <a href="#">113244506</a> | -3.73470956 | -1.901   | 0.001708 | 0.006136 |
| ANPEP        | <a href="#">113263695</a> | -3.73594503 | -1.90147 | 0.014813 | 0.039058 |
| MYH10        | <a href="#">113271188</a> | -3.73649202 | -1.90168 | 0.000451 | 0.001911 |
| SLC5A2       | <a href="#">113267726</a> | -3.73862525 | -1.90251 | 0.000275 | 0.001238 |
| CARD6        | <a href="#">113260930</a> | -3.74358565 | -1.90442 | 8.32E-07 | 6.44E-06 |
| ENTPD5       | <a href="#">113270347</a> | -3.74399733 | -1.90458 | 5.13E-05 | 0.000274 |
| EMP3         | <a href="#">113243353</a> | -3.74535305 | -1.9051  | 1.48E-05 | 8.94E-05 |
| RABIF        | <a href="#">113242533</a> | -3.74548407 | -1.90515 | 1.3E-06  | 9.69E-06 |
| HAT1         | <a href="#">113250775</a> | -3.74837132 | -1.90626 | 1.23E-06 | 9.23E-06 |
| TMEM176A     | <a href="#">113241472</a> | -3.74855756 | -1.90634 | 0.000252 | 0.001142 |
| ELF1         | <a href="#">113251381</a> | -3.74982293 | -1.90682 | 4.95E-06 | 3.34E-05 |
| COL5A3       | <a href="#">113242683</a> | -3.75226109 | -1.90776 | 0.015289 | 0.040119 |
| PAPSS1       | <a href="#">113255537</a> | -3.762843   | -1.91182 | 3.23E-06 | 2.25E-05 |
| SLC45A4      | <a href="#">113247951</a> | -3.76394732 | -1.91225 | 6.13E-05 | 0.000323 |
| RAVER1       | <a href="#">113242981</a> | -3.76421361 | -1.91235 | 2.67E-06 | 1.88E-05 |
| DCLRE1A      | <a href="#">113251953</a> | -3.76456729 | -1.91248 | 1.84E-06 | 1.34E-05 |
| PSMB9        | <a href="#">113243783</a> | -3.7667202  | -1.91331 | 4E-05    | 0.000218 |
| HVCN1        | <a href="#">113266965</a> | -3.76725699 | -1.91351 | 1.59E-05 | 9.55E-05 |
| HAUS1        | <a href="#">113253375</a> | -3.76736328 | -1.91356 | 1.73E-05 | 0.000103 |
| SERP1        | <a href="#">113254059</a> | -3.77252136 | -1.91553 | 2.13E-05 | 0.000124 |
| CASP7        | <a href="#">113251949</a> | -3.77305515 | -1.91573 | 2.89E-06 | 2.03E-05 |
| CTSZ         | <a href="#">113258770</a> | -3.77688742 | -1.9172  | 6.23E-07 | 4.93E-06 |
| MYEF2        | <a href="#">113269586</a> | -3.777774   | -1.91754 | 0.001258 | 0.004713 |

|              |                           |             |          |          |          |
|--------------|---------------------------|-------------|----------|----------|----------|
| RANBP3L      | <a href="#">113260896</a> | -3.78213001 | -1.9192  | 0.002608 | 0.008854 |
| CDC14A       | <a href="#">113254350</a> | -3.78455292 | -1.92012 | 2.63E-05 | 0.00015  |
| ADAM19       | <a href="#">113264021</a> | -3.78703919 | -1.92107 | 8.56E-06 | 5.49E-05 |
| GPAT3        | <a href="#">113263192</a> | -3.78937761 | -1.92196 | 2.98E-06 | 2.08E-05 |
| MFSD14B      | <a href="#">113270083</a> | -3.79003309 | -1.92221 | 1.55E-06 | 1.14E-05 |
| ACKR1        | <a href="#">113246679</a> | -3.79704377 | -1.92488 | 7.4E-06  | 4.82E-05 |
| HPS1         | <a href="#">113251807</a> | -3.80273474 | -1.92704 | 1.36E-06 | 1.01E-05 |
| PRDM1        | <a href="#">113264785</a> | -3.80432093 | -1.92764 | 0.000228 | 0.001045 |
| TLR7         | <a href="#">113240728</a> | -3.8046811  | -1.92778 | 0.000589 | 0.002426 |
| PTPN18       | <a href="#">113251152</a> | -3.81043372 | -1.92996 | 0.000118 | 0.000583 |
| AK3          | <a href="#">113270164</a> | -3.81108877 | -1.9302  | 4.69E-07 | 3.79E-06 |
| AMPD2        | <a href="#">113244918</a> | -3.81132812 | -1.93029 | 4.45E-06 | 3.03E-05 |
| ARID3B       | <a href="#">113240966</a> | -3.81166396 | -1.93042 | 1.44E-05 | 8.76E-05 |
| TMEM205      | <a href="#">113243020</a> | -3.81377761 | -1.93122 | 0.000635 | 0.00259  |
| JAZF1        | <a href="#">113262144</a> | -3.81449597 | -1.93149 | 1.87E-05 | 0.00011  |
| TTC39C       | <a href="#">113253296</a> | -3.81522388 | -1.93177 | 0.000277 | 0.001243 |
| ADGRE5       | <a href="#">113247147</a> | -3.81761595 | -1.93267 | 9.02E-07 | 6.94E-06 |
| ERP29        | <a href="#">113266976</a> | -3.81780597 | -1.93274 | 3.7E-07  | 3.04E-06 |
| MSRB1        | <a href="#">113245140</a> | -3.824362   | -1.93522 | 5.19E-05 | 0.000277 |
| CUNH5orf30   | <a href="#">113255025</a> | -3.82539337 | -1.93561 | 5.94E-06 | 3.94E-05 |
| CTSH         | <a href="#">113263792</a> | -3.82826703 | -1.93669 | 1.55E-06 | 1.14E-05 |
| GPR34        | <a href="#">113265887</a> | -3.83015347 | -1.9374  | 2.86E-05 | 0.000162 |
| LOC113243786 | <a href="#">113243786</a> | -3.83074095 | -1.93762 | 9.66E-07 | 7.4E-06  |
| LOC113254133 | <a href="#">113254133</a> | -3.83266545 | -1.93835 | 3.96E-05 | 0.000216 |
| POLA2        | <a href="#">113244119</a> | -3.8344426  | -1.93902 | 3.04E-06 | 2.12E-05 |
| SFI1         | <a href="#">113245062</a> | -3.83482987 | -1.93916 | 3.39E-05 | 0.000188 |
| STARD5       | <a href="#">113263765</a> | -3.83909004 | -1.94076 | 8.53E-06 | 5.48E-05 |
| UBN1         | <a href="#">113270831</a> | -3.84278121 | -1.94215 | 1.09E-05 | 6.85E-05 |

|              |                           |             |          |          |          |
|--------------|---------------------------|-------------|----------|----------|----------|
| TNFAIP3      | <a href="#">113259486</a> | -3.84348484 | -1.94241 | 1.98E-05 | 0.000116 |
| LRRC3        | <a href="#">113251316</a> | -3.8470491  | -1.94375 | 0.002795 | 0.009426 |
| SPATS2       | <a href="#">113257650</a> | -3.84816234 | -1.94417 | 1.13E-06 | 8.51E-06 |
| IFI6         | <a href="#">113268433</a> | -3.84836858 | -1.94425 | 0.000499 | 0.002097 |
| SLC25A16     | <a href="#">113259113</a> | -3.84964694 | -1.94473 | 0.001338 | 0.00497  |
| ZSWIM6       | <a href="#">113254899</a> | -3.84987401 | -1.94481 | 6.92E-05 | 0.00036  |
| MARCKSL1     | <a href="#">113268358</a> | -3.85076296 | -1.94514 | 0.000135 | 0.000656 |
| GPSM2        | <a href="#">113244939</a> | -3.85564844 | -1.94697 | 8.83E-07 | 6.8E-06  |
| GZMK         | <a href="#">113263921</a> | -3.85836104 | -1.94799 | 0.001419 | 0.005232 |
| NCOA7        | <a href="#">113259416</a> | -3.87049706 | -1.95252 | 3.19E-07 | 2.66E-06 |
| LRRC3C       | <a href="#">113265504</a> | -3.87226836 | -1.95318 | 0.011796 | 0.032152 |
| ELMO1        | <a href="#">113262812</a> | -3.87303129 | -1.95346 | 1.03E-06 | 7.85E-06 |
| TUBA1C       | <a href="#">113257654</a> | -3.87440545 | -1.95397 | 0.00027  | 0.001215 |
| PRCP         | <a href="#">113269378</a> | -3.87454448 | -1.95403 | 7.55E-07 | 5.88E-06 |
| RINL         | <a href="#">113243605</a> | -3.87572216 | -1.95447 | 0.00051  | 0.002136 |
| HNRNPAB      | <a href="#">113261580</a> | -3.8786664  | -1.95556 | 0.000147 | 0.000708 |
| NINL         | <a href="#">113248359</a> | -3.87884361 | -1.95563 | 0.000138 | 0.000665 |
| NADK         | <a href="#">113270619</a> | -3.88119224 | -1.9565  | 9.25E-05 | 0.000467 |
| PRELID1      | <a href="#">113264141</a> | -3.88136294 | -1.95656 | 5.2E-06  | 3.49E-05 |
| C1RL         | <a href="#">113257942</a> | -3.88308343 | -1.9572  | 0.000599 | 0.00246  |
| CEP128       | <a href="#">113270273</a> | -3.88322414 | -1.95725 | 0.000137 | 0.000665 |
| TOR2A        | <a href="#">113266433</a> | -3.88370225 | -1.95743 | 2.64E-05 | 0.000151 |
| CHPT1        | <a href="#">113256089</a> | -3.88552667 | -1.95811 | 0.001859 | 0.006598 |
| CHST15       | <a href="#">113252027</a> | -3.88853357 | -1.95923 | 1.41E-05 | 8.62E-05 |
| PHGDH        | <a href="#">113244360</a> | -3.89108441 | -1.96017 | 5.81E-06 | 3.86E-05 |
| TNS3         | <a href="#">113257644</a> | -3.89221806 | -1.96059 | 0.000358 | 0.001563 |
| LOC113249452 | <a href="#">113249452</a> | -3.90085049 | -1.96379 | 0.000342 | 0.001497 |
| CHST11       | <a href="#">113256057</a> | -3.90165522 | -1.96409 | 2.92E-05 | 0.000165 |

|              |                           |             |          |          |          |
|--------------|---------------------------|-------------|----------|----------|----------|
| KCP          | <a href="#">113263934</a> | -3.90796087 | -1.96642 | 0.00045  | 0.00191  |
| IRAK4        | <a href="#">113257718</a> | -3.91163777 | -1.96777 | 5.52E-07 | 4.41E-06 |
| LOC113256915 | <a href="#">113256915</a> | -3.91538157 | -1.96915 | 0.000311 | 0.00138  |
| C1S          | <a href="#">113257945</a> | -3.91540971 | -1.96916 | 2.22E-05 | 0.000128 |
| AK2          | <a href="#">113268337</a> | -3.91621653 | -1.96946 | 1.24E-05 | 7.65E-05 |
| LOC113269263 | <a href="#">113269263</a> | -3.91638234 | -1.96952 | 4.46E-06 | 3.04E-05 |
| DOK1         | <a href="#">113243457</a> | -3.91742153 | -1.9699  | 1.84E-05 | 0.000109 |
| HMGA1        | <a href="#">113243823</a> | -3.92323595 | -1.97204 | 0.00031  | 0.001375 |
| CBL          | <a href="#">113259962</a> | -3.92470037 | -1.97258 | 3.08E-06 | 2.15E-05 |
| RAP1B        | <a href="#">113256300</a> | -3.92698742 | -1.97342 | 7.67E-05 | 0.000394 |
| ACO1         | <a href="#">113260538</a> | -3.92749463 | -1.97361 | 0.001665 | 0.006007 |
| EXOSC4       | <a href="#">113247677</a> | -3.93174788 | -1.97517 | 1.34E-05 | 8.2E-05  |
| FCER1A       | <a href="#">113246733</a> | -3.93176711 | -1.97518 | 0.001198 | 0.004508 |
| GPX1         | <a href="#">113256871</a> | -3.93466517 | -1.97624 | 0.000367 | 0.001595 |
| FADS3        | <a href="#">113246997</a> | -3.93478439 | -1.97628 | 0.002164 | 0.007546 |
| NDE1         | <a href="#">113270761</a> | -3.93489694 | -1.97633 | 1.15E-06 | 8.62E-06 |
| RILPL2       | <a href="#">113266896</a> | -3.93589079 | -1.97669 | 4.91E-06 | 3.32E-05 |
| MON1B        | <a href="#">113252512</a> | -3.938575   | -1.97767 | 4.51E-06 | 3.07E-05 |
| TMSB15A      | <a href="#">113244311</a> | -3.93886375 | -1.97778 | 1.47E-05 | 8.9E-05  |
| ATL1         | <a href="#">113266214</a> | -3.93891142 | -1.9778  | 0.001741 | 0.00624  |
| KLHL25       | <a href="#">113263670</a> | -3.9402318  | -1.97828 | 9.95E-05 | 0.000499 |
| ARHGAP27     | <a href="#">113265320</a> | -3.94023603 | -1.97828 | 1.45E-05 | 8.78E-05 |
| CD47         | <a href="#">113250904</a> | -3.94157691 | -1.97877 | 1.79E-06 | 1.3E-05  |
| SLC7A7       | <a href="#">113246073</a> | -3.94488506 | -1.97998 | 1.9E-06  | 1.38E-05 |
| PTGER3       | <a href="#">113254534</a> | -3.94695849 | -1.98074 | 0.0017   | 0.006114 |
| MAN1C1       | <a href="#">113268483</a> | -3.94852631 | -1.98131 | 1.45E-05 | 8.81E-05 |
| OSTF1        | <a href="#">113269842</a> | -3.95156321 | -1.98242 | 3.14E-06 | 2.19E-05 |
| LOC113248320 | <a href="#">113248320</a> | -3.95277873 | -1.98287 | 0.00161  | 0.005836 |

|              |                           |             |          |          |          |
|--------------|---------------------------|-------------|----------|----------|----------|
| ADPGK        | <a href="#">113240943</a> | -3.96025935 | -1.98559 | 1.89E-07 | 1.65E-06 |
| DTX3L        | <a href="#">113252271</a> | -3.96300356 | -1.98659 | 4.1E-07  | 3.36E-06 |
| GAS7         | <a href="#">113271206</a> | -3.96402466 | -1.98697 | 2.05E-07 | 1.77E-06 |
| C3AR1        | <a href="#">113257930</a> | -3.96930396 | -1.98889 | 0.000331 | 0.001457 |
| PCLO         | <a href="#">113259286</a> | -3.97413537 | -1.99064 | 0.000566 | 0.002337 |
| DEDD2        | <a href="#">113243512</a> | -3.98007607 | -1.9928  | 5.38E-05 | 0.000286 |
| CELF6        | <a href="#">113240938</a> | -3.98120914 | -1.99321 | 0.000498 | 0.002092 |
| TRERF1       | <a href="#">113261295</a> | -3.98154456 | -1.99333 | 3.86E-05 | 0.000212 |
| TUT7         | <a href="#">113269792</a> | -3.9889162  | -1.996   | 1.33E-05 | 8.15E-05 |
| CMTM6        | <a href="#">113253836</a> | -3.99032923 | -1.99651 | 7.16E-07 | 5.61E-06 |
| LOC113248329 | <a href="#">113248329</a> | -3.99330039 | -1.99758 | 1.93E-07 | 1.68E-06 |
| MAST3        | <a href="#">113256703</a> | -3.99774098 | -1.99918 | 6.44E-06 | 4.25E-05 |
| ZGRF1        | <a href="#">113255586</a> | -4.00029531 | -2.00011 | 5.48E-05 | 0.000291 |
| PLD1         | <a href="#">113255060</a> | -4.00474839 | -2.00171 | 3.34E-05 | 0.000186 |
| LYPD6        | <a href="#">113250899</a> | -4.00660644 | -2.00238 | 0.004944 | 0.015427 |
| LIPE         | <a href="#">113243521</a> | -4.00662341 | -2.00239 | 0.003844 | 0.012384 |
| MOXD1        | <a href="#">113259456</a> | -4.01565691 | -2.00564 | 0.000661 | 0.002682 |
| MX2          | <a href="#">113256765</a> | -4.01614105 | -2.00581 | 0.000533 | 0.002217 |
| CCDC18       | <a href="#">113254399</a> | -4.02118347 | -2.00762 | 7.5E-06  | 4.88E-05 |
| EGFL6        | <a href="#">113240724</a> | -4.02377972 | -2.00855 | 0.003487 | 0.0114   |
| LASP1        | <a href="#">113265534</a> | -4.02383382 | -2.00857 | 5.4E-06  | 3.62E-05 |
| HAAO         | <a href="#">113246496</a> | -4.02395055 | -2.00861 | 1.23E-05 | 7.59E-05 |
| GNAZ         | <a href="#">113247070</a> | -4.02689089 | -2.00967 | 0.000645 | 0.002628 |
| IL10RA       | <a href="#">113260009</a> | -4.03094526 | -2.01112 | 1.26E-05 | 7.8E-05  |
| CKB          | <a href="#">113267218</a> | -4.03193489 | -2.01147 | 0.000147 | 0.000706 |
| ARMC4        | <a href="#">113244257</a> | -4.03402684 | -2.01222 | 0.002802 | 0.00944  |
| C4BPB        | <a href="#">113242606</a> | -4.03476863 | -2.01249 | 1.12E-06 | 8.43E-06 |
| CSF1R        | <a href="#">113263940</a> | -4.03912972 | -2.01404 | 6.33E-06 | 4.18E-05 |

|              |                           |             |          |          |          |
|--------------|---------------------------|-------------|----------|----------|----------|
| MINPP1       | <a href="#">113258980</a> | -4.0405557  | -2.01455 | 2.29E-07 | 1.97E-06 |
| CHRNA5       | <a href="#">113263807</a> | -4.04150076 | -2.01489 | 0.007451 | 0.021843 |
| KLRG1        | <a href="#">113257921</a> | -4.0461773  | -2.01656 | 2.01E-05 | 0.000117 |
| HELB         | <a href="#">113256310</a> | -4.04795505 | -2.01719 | 3.01E-05 | 0.000169 |
| HEBP1        | <a href="#">113257865</a> | -4.05408814 | -2.01938 | 1.77E-06 | 1.29E-05 |
| DCAF12       | <a href="#">113260516</a> | -4.05637442 | -2.02019 | 6.36E-05 | 0.000334 |
| SMC1A        | <a href="#">113247516</a> | -4.07434953 | -2.02657 | 0.000135 | 0.000653 |
| LOC113263976 | <a href="#">113263976</a> | -4.0757432  | -2.02706 | 0.006618 | 0.01979  |
| SRC          | <a href="#">113258578</a> | -4.07613395 | -2.0272  | 6.49E-06 | 4.28E-05 |
| EAF2         | <a href="#">113252133</a> | -4.076701   | -2.0274  | 0.002201 | 0.007654 |
| GLUL         | <a href="#">113262718</a> | -4.07693504 | -2.02748 | 0.001237 | 0.004641 |
| LMNB2        | <a href="#">113242766</a> | -4.07716269 | -2.02757 | 1.19E-06 | 8.93E-06 |
| ARHGAP33     | <a href="#">113244760</a> | -4.07846351 | -2.02803 | 5.97E-05 | 0.000315 |
| SDK2         | <a href="#">113265212</a> | -4.08032417 | -2.02868 | 0.00817  | 0.023594 |
| CASP8        | <a href="#">113250592</a> | -4.08414189 | -2.03003 | 1.2E-07  | 1.09E-06 |
| CUNH19orf71  | <a href="#">113242803</a> | -4.08614203 | -2.03074 | 0.000711 | 0.002863 |
| BTN1A1       | <a href="#">113264254</a> | -4.0951686  | -2.03392 | 1.22E-06 | 9.15E-06 |
| ITGB7        | <a href="#">113257564</a> | -4.0992241  | -2.03535 | 1.89E-05 | 0.000112 |
| AZIN1        | <a href="#">113252854</a> | -4.10230062 | -2.03643 | 9.85E-05 | 0.000495 |
| RFC3         | <a href="#">113251252</a> | -4.10545195 | -2.03754 | 9.34E-06 | 5.94E-05 |
| IFI35        | <a href="#">113265387</a> | -4.10556882 | -2.03758 | 1.01E-06 | 7.68E-06 |
| VWA2         | <a href="#">113251959</a> | -4.11186746 | -2.03979 | 0.00485  | 0.015177 |
| MYD88        | <a href="#">113253781</a> | -4.12837074 | -2.04557 | 1.23E-08 | 1.33E-07 |
| WRN          | <a href="#">113262139</a> | -4.1374276  | -2.04873 | 1.26E-05 | 7.76E-05 |
| MFS10        | <a href="#">113245734</a> | -4.13956336 | -2.04948 | 1.08E-06 | 8.21E-06 |
| GIPR         | <a href="#">113243420</a> | -4.14659822 | -2.05193 | 0.008202 | 0.023651 |
| LETM2        | <a href="#">113262088</a> | -4.1480443  | -2.05243 | 6.52E-05 | 0.00034  |
| CUNH11orf80  | <a href="#">113244051</a> | -4.14867373 | -2.05265 | 0.014138 | 0.037506 |

|              |                           |             |          |          |          |
|--------------|---------------------------|-------------|----------|----------|----------|
| DNAH11       | <a href="#">113261258</a> | -4.15393261 | -2.05448 | 0.00022  | 0.001017 |
| LOC113264282 | <a href="#">113264282</a> | -4.17015631 | -2.0601  | 0.00118  | 0.004451 |
| SIRT7        | <a href="#">113244493</a> | -4.17171325 | -2.06064 | 4.26E-07 | 3.48E-06 |
| SERPINF1     | <a href="#">113269130</a> | -4.17404266 | -2.06145 | 0.001583 | 0.005757 |
| PPIP5K2      | <a href="#">113255027</a> | -4.17405019 | -2.06145 | 9.72E-07 | 7.44E-06 |
| NCAPH        | <a href="#">113241929</a> | -4.17741914 | -2.06261 | 2.43E-07 | 2.08E-06 |
| SLC25A38     | <a href="#">113253799</a> | -4.17749035 | -2.06264 | 8.62E-07 | 6.65E-06 |
| MAD2L1       | <a href="#">113255618</a> | -4.17971152 | -2.0634  | 7.06E-07 | 5.53E-06 |
| CGAS         | <a href="#">113261117</a> | -4.18320015 | -2.06461 | 0.000585 | 0.002413 |
| BCL2A1       | <a href="#">113263784</a> | -4.18898392 | -2.0666  | 0.000173 | 0.000822 |
| ARMH2        | <a href="#">113264325</a> | -4.19209436 | -2.06767 | 0.003355 | 0.01102  |
| PARP12       | <a href="#">113265009</a> | -4.19321994 | -2.06806 | 1.09E-06 | 8.24E-06 |
| RETN         | <a href="#">113242926</a> | -4.19482764 | -2.06861 | 0.000237 | 0.001082 |
| SSBP3        | <a href="#">113254633</a> | -4.19520766 | -2.06874 | 7.88E-07 | 6.13E-06 |
| CGN          | <a href="#">113246194</a> | -4.20359224 | -2.07162 | 0.001816 | 0.00647  |
| TTC39B       | <a href="#">113260608</a> | -4.20547972 | -2.07227 | 7.04E-05 | 0.000366 |
| CDHR4        | <a href="#">113256614</a> | -4.20575249 | -2.07236 | 0.002551 | 0.008693 |
| BCAT1        | <a href="#">113257794</a> | -4.20981721 | -2.07376 | 9.4E-06  | 5.97E-05 |
| GRN          | <a href="#">113265352</a> | -4.21194166 | -2.07449 | 2.56E-05 | 0.000146 |
| PDE5A        | <a href="#">113255615</a> | -4.2128862  | -2.07481 | 4.12E-06 | 2.82E-05 |
| SLBP         | <a href="#">113245752</a> | -4.21297979 | -2.07484 | 7.26E-07 | 5.68E-06 |
| TSPAN14      | <a href="#">113259228</a> | -4.21980673 | -2.07718 | 1.11E-07 | 1.01E-06 |
| PMM2         | <a href="#">113270815</a> | -4.22271384 | -2.07817 | 2.42E-07 | 2.07E-06 |
| LOC113269256 | <a href="#">113269256</a> | -4.22833263 | -2.08009 | 0.001929 | 0.006809 |
| ETV6         | <a href="#">113257879</a> | -4.23510221 | -2.0824  | 2.2E-06  | 1.57E-05 |
| MCUB         | <a href="#">113255555</a> | -4.2355163  | -2.08254 | 8.46E-08 | 7.91E-07 |
| PPP1R18      | <a href="#">113264357</a> | -4.23717057 | -2.0831  | 1.06E-06 | 8.04E-06 |
| SPHK1        | <a href="#">113244597</a> | -4.23895642 | -2.08371 | 8.2E-08  | 7.7E-07  |

|              |                           |             |          |          |          |
|--------------|---------------------------|-------------|----------|----------|----------|
| RHBDL2       | <a href="#">113268258</a> | -4.23951034 | -2.0839  | 0.009338 | 0.026366 |
| C7           | <a href="#">113260932</a> | -4.24037841 | -2.08419 | 9.35E-06 | 5.94E-05 |
| CHRNA3       | <a href="#">113263806</a> | -4.24339374 | -2.08522 | 0.005253 | 0.016262 |
| SLC49A3      | <a href="#">113245736</a> | -4.24358166 | -2.08528 | 3.66E-05 | 0.000202 |
| HAUS5        | <a href="#">113244774</a> | -4.24885601 | -2.08707 | 2.76E-06 | 1.94E-05 |
| GRINA        | <a href="#">113247592</a> | -4.25067875 | -2.08769 | 5.73E-06 | 3.81E-05 |
| ATP1B3       | <a href="#">113254012</a> | -4.25818867 | -2.09024 | 4.88E-07 | 3.94E-06 |
| PDK3         | <a href="#">113242221</a> | -4.25897724 | -2.09051 | 3.99E-06 | 2.74E-05 |
| TFDP2        | <a href="#">113254014</a> | -4.26870737 | -2.0938  | 0.000115 | 0.000568 |
| SFN          | <a href="#">113268452</a> | -4.26896506 | -2.09389 | 0.000584 | 0.00241  |
| AGER         | <a href="#">113243764</a> | -4.27739284 | -2.09673 | 0.000416 | 0.00178  |
| UROS         | <a href="#">113252048</a> | -4.27889224 | -2.09724 | 1.27E-05 | 7.85E-05 |
| DENND4A      | <a href="#">113240877</a> | -4.2825589  | -2.09847 | 3.03E-05 | 0.00017  |
| TLL2         | <a href="#">113251770</a> | -4.28541393 | -2.09943 | 0.009593 | 0.026974 |
| UROD         | <a href="#">113254751</a> | -4.28571942 | -2.09954 | 1.88E-06 | 1.36E-05 |
| LOC113248439 | <a href="#">113248439</a> | -4.28829132 | -2.1004  | 0.005063 | 0.015764 |
| EXOC3L2      | <a href="#">113243437</a> | -4.30331048 | -2.10545 | 0.003785 | 0.01223  |
| FNBP1        | <a href="#">113266518</a> | -4.31720132 | -2.1101  | 1.93E-07 | 1.68E-06 |
| TRIM37       | <a href="#">113268881</a> | -4.32012203 | -2.11107 | 7.95E-08 | 7.49E-07 |
| ENTPD7       | <a href="#">113251816</a> | -4.32018383 | -2.11109 | 1.01E-05 | 6.36E-05 |
| SLC16A6      | <a href="#">113265239</a> | -4.32226225 | -2.11179 | 0.000657 | 0.002668 |
| MFNG         | <a href="#">113241808</a> | -4.32581847 | -2.11297 | 1.45E-07 | 1.29E-06 |
| RAB8A        | <a href="#">113256641</a> | -4.32645654 | -2.11319 | 2.73E-07 | 2.31E-06 |
| WDR31        | <a href="#">113266314</a> | -4.32856879 | -2.11389 | 0.000651 | 0.002648 |
| APOC1        | <a href="#">113243451</a> | -4.33006071 | -2.11439 | 0.000756 | 0.003017 |
| ECHDC1       | <a href="#">113259426</a> | -4.33324557 | -2.11545 | 3.73E-05 | 0.000205 |
| ENDOD1       | <a href="#">113259814</a> | -4.33396627 | -2.11569 | 8.7E-05  | 0.000443 |
| MTBP         | <a href="#">113252769</a> | -4.33731608 | -2.1168  | 1.44E-05 | 8.77E-05 |

|              |                           |             |          |          |          |
|--------------|---------------------------|-------------|----------|----------|----------|
| TENT5A       | <a href="#">113261073</a> | -4.34882364 | -2.12063 | 7.37E-05 | 0.000381 |
| TLR4         | <a href="#">113266343</a> | -4.35228306 | -2.12177 | 6.3E-07  | 4.98E-06 |
| HELLS        | <a href="#">113243188</a> | -4.35289969 | -2.12198 | 5.55E-06 | 3.7E-05  |
| LDLR         | <a href="#">113243010</a> | -4.35723782 | -2.12341 | 5.38E-06 | 3.6E-05  |
| RAB3D        | <a href="#">113243016</a> | -4.35765507 | -2.12355 | 4.83E-06 | 3.27E-05 |
| HYOU1        | <a href="#">113259976</a> | -4.35962919 | -2.12421 | 1.1E-07  | 1.01E-06 |
| TAP1         | <a href="#">113243781</a> | -4.3599963  | -2.12433 | 8.07E-08 | 7.6E-07  |
| GRAMD1B      | <a href="#">113259927</a> | -4.36339796 | -2.12545 | 2.82E-05 | 0.00016  |
| CCK          | <a href="#">113253819</a> | -4.36694433 | -2.12662 | 0.0016   | 0.005808 |
| LOC113243706 | <a href="#">113243706</a> | -4.37082951 | -2.12791 | 8.56E-07 | 6.6E-06  |
| SMPDL3A      | <a href="#">113259406</a> | -4.37555169 | -2.12946 | 1.9E-05  | 0.000112 |
| RAB38        | <a href="#">113269414</a> | -4.37770526 | -2.13017 | 0.000785 | 0.003116 |
| RNF17        | <a href="#">113251157</a> | -4.38331475 | -2.13202 | 0.000721 | 0.002898 |
| CPZ          | <a href="#">113245674</a> | -4.3834324  | -2.13206 | 0.002156 | 0.007521 |
| GLYCTK       | <a href="#">113256948</a> | -4.38459294 | -2.13244 | 1.71E-06 | 1.25E-05 |
| MRNIP        | <a href="#">113261552</a> | -4.38870731 | -2.1338  | 8.96E-06 | 5.72E-05 |
| TTC25        | <a href="#">113265437</a> | -4.38990788 | -2.13419 | 0.000178 | 0.000843 |
| INPP4A       | <a href="#">113246757</a> | -4.3904051  | -2.13435 | 7E-07    | 5.49E-06 |
| LOC113243878 | <a href="#">113243878</a> | -4.39902859 | -2.13718 | 0.000375 | 0.001625 |
| NHSL2        | <a href="#">113245601</a> | -4.39980607 | -2.13744 | 2.19E-05 | 0.000127 |
| MMD          | <a href="#">113265653</a> | -4.40034668 | -2.13762 | 2.01E-07 | 1.74E-06 |
| HECTD4       | <a href="#">113266981</a> | -4.40512662 | -2.13918 | 8.95E-05 | 0.000453 |
| SLC25A37     | <a href="#">113269979</a> | -4.40730243 | -2.1399  | 0.000615 | 0.002518 |
| LOC113245037 | <a href="#">113245037</a> | -4.4075716  | -2.13998 | 0.013018 | 0.034998 |
| DTX4         | <a href="#">113246549</a> | -4.40836415 | -2.14024 | 1.24E-07 | 1.12E-06 |
| TRPV2        | <a href="#">113271253</a> | -4.40963685 | -2.14066 | 3.09E-07 | 2.59E-06 |
| SRPX         | <a href="#">113265859</a> | -4.4111003  | -2.14114 | 0.000225 | 0.001034 |
| PGAM1        | <a href="#">113251781</a> | -4.41579381 | -2.14267 | 1.9E-05  | 0.000112 |

|              |                           |             |          |          |          |
|--------------|---------------------------|-------------|----------|----------|----------|
| RTN3         | <a href="#">113244199</a> | -4.4179656  | -2.14338 | 3.49E-05 | 0.000193 |
| CGREF1       | <a href="#">113270980</a> | -4.41850406 | -2.14356 | 0.000205 | 0.000949 |
| PPM1H        | <a href="#">113256344</a> | -4.41950363 | -2.14388 | 2.91E-08 | 2.94E-07 |
| SMCO3        | <a href="#">113257853</a> | -4.41957923 | -2.14391 | 0.000313 | 0.001389 |
| CCHCR1       | <a href="#">113264341</a> | -4.42233887 | -2.14481 | 3.16E-07 | 2.64E-06 |
| L3MBTL1      | <a href="#">113258620</a> | -4.42693956 | -2.14631 | 0.001136 | 0.004306 |
| FANCC        | <a href="#">113269780</a> | -4.42847696 | -2.14681 | 3.77E-05 | 0.000207 |
| STXBP5       | <a href="#">113259533</a> | -4.43479385 | -2.14887 | 3.67E-07 | 3.02E-06 |
| TSC22D4      | <a href="#">113267863</a> | -4.43876125 | -2.15016 | 6.97E-07 | 5.47E-06 |
| CRLF1        | <a href="#">113256600</a> | -4.44001939 | -2.15057 | 0.012025 | 0.032683 |
| PHLPP2       | <a href="#">113252456</a> | -4.44101968 | -2.15089 | 1.76E-05 | 0.000105 |
| LOC113270472 | <a href="#">113270472</a> | -4.44535921 | -2.1523  | 1.29E-05 | 7.95E-05 |
| ACVR1C       | <a href="#">113250865</a> | -4.44615015 | -2.15256 | 0.00136  | 0.005039 |
| PRSS35       | <a href="#">113261060</a> | -4.44891466 | -2.15345 | 0.008155 | 0.023561 |
| ATP6V1A      | <a href="#">113251490</a> | -4.45112216 | -2.15417 | 6.2E-07  | 4.91E-06 |
| CDH2         | <a href="#">113253311</a> | -4.46174543 | -2.15761 | 0.008011 | 0.023243 |
| SNX15        | <a href="#">113244141</a> | -4.48073376 | -2.16374 | 2.62E-06 | 1.86E-05 |
| NOD2         | <a href="#">113252225</a> | -4.48077301 | -2.16375 | 4.01E-05 | 0.000218 |
| CD55         | <a href="#">113242611</a> | -4.48385476 | -2.16474 | 5.01E-06 | 3.38E-05 |
| CUNH7orf61   | <a href="#">113267864</a> | -4.48581857 | -2.16537 | 0.000135 | 0.000656 |
| LOC113270979 | <a href="#">113270979</a> | -4.49096081 | -2.16702 | 3.23E-07 | 2.69E-06 |
| DBNL         | <a href="#">113257931</a> | -4.49173512 | -2.16727 | 9.31E-08 | 8.62E-07 |
| CFAP43       | <a href="#">113251901</a> | -4.49428604 | -2.16809 | 0.000259 | 0.00117  |
| PDIA4        | <a href="#">113241454</a> | -4.49488697 | -2.16828 | 4.9E-07  | 3.95E-06 |
| RANGAP1      | <a href="#">113241735</a> | -4.50223403 | -2.17064 | 2.14E-08 | 2.21E-07 |
| RARRES1      | <a href="#">113254123</a> | -4.51053485 | -2.1733  | 0.000239 | 0.001089 |
| ARL6IP6      | <a href="#">113250878</a> | -4.51602424 | -2.17505 | 3.16E-07 | 2.64E-06 |
| PIP4K2A      | <a href="#">113241338</a> | -4.52270132 | -2.17718 | 5.69E-07 | 4.53E-06 |

|              |                           |             |          |          |          |
|--------------|---------------------------|-------------|----------|----------|----------|
| ABHD3        | <a href="#">113253273</a> | -4.52386482 | -2.17756 | 2.83E-06 | 1.99E-05 |
| P2RY12       | <a href="#">113254065</a> | -4.52506147 | -2.17794 | 0.000108 | 0.000536 |
| PARP8        | <a href="#">113260964</a> | -4.5314162  | -2.17996 | 5.57E-07 | 4.45E-06 |
| ARL6IP1      | <a href="#">113270748</a> | -4.53435151 | -2.1809  | 1.29E-05 | 7.95E-05 |
| HAP1         | <a href="#">113265447</a> | -4.53589011 | -2.18139 | 0.000395 | 0.001703 |
| FAM214B      | <a href="#">113260486</a> | -4.53591112 | -2.18139 | 1.11E-07 | 1.01E-06 |
| IRF4         | <a href="#">113264375</a> | -4.53676651 | -2.18166 | 4.17E-06 | 2.85E-05 |
| SLCO4A1      | <a href="#">113258796</a> | -4.53855126 | -2.18223 | 1.7E-05  | 0.000101 |
| CTSW         | <a href="#">113244090</a> | -4.54118957 | -2.18307 | 0.001499 | 0.005498 |
| XPO6         | <a href="#">113267617</a> | -4.54504072 | -2.18429 | 7.81E-08 | 7.38E-07 |
| PLD4         | <a href="#">113267186</a> | -4.55825015 | -2.18848 | 0.000344 | 0.001508 |
| VCAN         | <a href="#">113255135</a> | -4.56843903 | -2.1917  | 0.001036 | 0.003971 |
| LOC113264292 | <a href="#">113264292</a> | -4.56882668 | -2.19182 | 0.000161 | 0.000769 |
| BST2         | <a href="#">113256678</a> | -4.57070634 | -2.19242 | 6.25E-07 | 4.95E-06 |
| LPCAT2       | <a href="#">113252250</a> | -4.57690791 | -2.19437 | 8.2E-06  | 5.28E-05 |
| HMGN2        | <a href="#">113268458</a> | -4.58198246 | -2.19597 | 0.001754 | 0.006275 |
| PTGS2        | <a href="#">113262761</a> | -4.58221175 | -2.19604 | 0.000211 | 0.000978 |
| SIPA1        | <a href="#">113244101</a> | -4.58596829 | -2.19723 | 4.65E-06 | 3.16E-05 |
| MARCH3       | <a href="#">113261671</a> | -4.58904922 | -2.1982  | 0.000191 | 0.000894 |
| ADAMTS2      | <a href="#">113261565</a> | -4.59597196 | -2.20037 | 0.001259 | 0.004715 |
| WDHD1        | <a href="#">113242349</a> | -4.60192817 | -2.20224 | 1.63E-08 | 1.73E-07 |
| SIDT1        | <a href="#">113251459</a> | -4.60648778 | -2.20367 | 0.001837 | 0.006531 |
| VASP         | <a href="#">113243424</a> | -4.60651049 | -2.20367 | 7.3E-06  | 4.75E-05 |
| LEF1         | <a href="#">113255544</a> | -4.60696506 | -2.20382 | 0.001455 | 0.005347 |
| GLIPR2       | <a href="#">113260456</a> | -4.61148719 | -2.20523 | 1.12E-07 | 1.02E-06 |
| DPY19L1      | <a href="#">113262663</a> | -4.61799206 | -2.20727 | 1.22E-08 | 1.33E-07 |
| ARAP1        | <a href="#">113269274</a> | -4.62544929 | -2.20959 | 1.64E-07 | 1.45E-06 |
| DHFR         | <a href="#">113255158</a> | -4.63144353 | -2.21146 | 5.07E-09 | 5.86E-08 |

|              |                           |             |          |          |          |
|--------------|---------------------------|-------------|----------|----------|----------|
| STRA8        | <a href="#">113267039</a> | -4.63580052 | -2.21282 | 1.29E-07 | 1.16E-06 |
| FZD3         | <a href="#">113269945</a> | -4.63812694 | -2.21354 | 0.001382 | 0.005114 |
| ERICH3       | <a href="#">113254525</a> | -4.64012353 | -2.21416 | 0.002867 | 0.009619 |
| LOC113260144 | <a href="#">113260144</a> | -4.64183105 | -2.21469 | 8.45E-06 | 5.43E-05 |
| PRXL2A       | <a href="#">113259227</a> | -4.64371874 | -2.21528 | 0.002348 | 0.008081 |
| LOC113241797 | <a href="#">113241797</a> | -4.64378828 | -2.2153  | 0.000347 | 0.001516 |
| EPSTI1       | <a href="#">113251367</a> | -4.64636933 | -2.2161  | 0.00013  | 0.000635 |
| GLDN         | <a href="#">113269624</a> | -4.6469378  | -2.21628 | 0.001287 | 0.004805 |
| NLRP1        | <a href="#">113271055</a> | -4.65137339 | -2.21766 | 0.000101 | 0.000507 |
| SHTN1        | <a href="#">113251974</a> | -4.65500088 | -2.21878 | 1.43E-06 | 1.06E-05 |
| MPL          | <a href="#">113254790</a> | -4.66206809 | -2.22097 | 0.000185 | 0.00087  |
| SLC2A3       | <a href="#">113257927</a> | -4.66311079 | -2.22129 | 5.63E-05 | 0.000298 |
| GALC         | <a href="#">113267389</a> | -4.67379585 | -2.22459 | 3.87E-05 | 0.000212 |
| NAAA         | <a href="#">113263259</a> | -4.67664794 | -2.22547 | 8.66E-08 | 8.08E-07 |
| RBL1         | <a href="#">113258573</a> | -4.67702775 | -2.22559 | 6.83E-07 | 5.37E-06 |
| BCAS1        | <a href="#">113258740</a> | -4.67969152 | -2.22641 | 0.000187 | 0.000879 |
| HPD          | <a href="#">113266938</a> | -4.68085714 | -2.22677 | 0.00213  | 0.007433 |
| PRKAR2B      | <a href="#">113258614</a> | -4.68415963 | -2.22779 | 1.45E-06 | 1.07E-05 |
| PFKP         | <a href="#">113241114</a> | -4.68491327 | -2.22802 | 4.95E-08 | 4.83E-07 |
| LOC113246847 | <a href="#">113246847</a> | -4.68715123 | -2.22871 | 5.32E-05 | 0.000283 |
| WDR86        | <a href="#">113241489</a> | -4.68909384 | -2.22931 | 0.004195 | 0.013347 |
| CSK          | <a href="#">113240974</a> | -4.71337102 | -2.23676 | 2.08E-07 | 1.8E-06  |
| LOC113264273 | <a href="#">113264273</a> | -4.71518254 | -2.23731 | 0.001006 | 0.00387  |
| SMPD2        | <a href="#">113264749</a> | -4.72230375 | -2.23949 | 1.55E-05 | 9.33E-05 |
| SKAP1        | <a href="#">113265573</a> | -4.72898131 | -2.24153 | 0.000756 | 0.003017 |
| CENPJ        | <a href="#">113251158</a> | -4.73764613 | -2.24417 | 9.77E-05 | 0.000491 |
| SCARB1       | <a href="#">113266877</a> | -4.74128416 | -2.24528 | 2E-08    | 2.08E-07 |
| SLC7A3       | <a href="#">113245611</a> | -4.74889211 | -2.24759 | 0.00086  | 0.00338  |

|          |                           |             |          |          |          |
|----------|---------------------------|-------------|----------|----------|----------|
| RGS2     | <a href="#">113268748</a> | -4.75075918 | -2.24816 | 8.32E-06 | 5.35E-05 |
| FAM49B   | <a href="#">113252720</a> | -4.7573043  | -2.25014 | 4.27E-08 | 4.23E-07 |
| CDKL1    | <a href="#">113266209</a> | -4.76196451 | -2.25156 | 4.51E-08 | 4.44E-07 |
| S100A4   | <a href="#">113245344</a> | -4.76224971 | -2.25164 | 0.000153 | 0.000732 |
| TRPC6    | <a href="#">113260153</a> | -4.76348628 | -2.25202 | 2.98E-05 | 0.000168 |
| SCLT1    | <a href="#">113255666</a> | -4.76484793 | -2.25243 | 4.74E-06 | 3.21E-05 |
| PAN3     | <a href="#">113251214</a> | -4.77255855 | -2.25476 | 4.2E-07  | 3.43E-06 |
| G6PC3    | <a href="#">113265366</a> | -4.78412565 | -2.25826 | 2.01E-09 | 2.53E-08 |
| KBTBD11  | <a href="#">113262011</a> | -4.78437832 | -2.25833 | 0.000311 | 0.00138  |
| SLC30A1  | <a href="#">113262666</a> | -4.78940766 | -2.25985 | 1.15E-08 | 1.26E-07 |
| PRIMPOL  | <a href="#">113262260</a> | -4.79267611 | -2.26083 | 3.58E-07 | 2.96E-06 |
| KIAA1551 | <a href="#">113257747</a> | -4.79321677 | -2.26099 | 6.36E-07 | 5.02E-06 |
| CPNE3    | <a href="#">113252972</a> | -4.79654557 | -2.262   | 8E-06    | 5.17E-05 |
| BAIAP2L1 | <a href="#">113267925</a> | -4.79847855 | -2.26258 | 0.000961 | 0.003718 |
| LMO2     | <a href="#">113265053</a> | -4.80022532 | -2.2631  | 1.49E-07 | 1.34E-06 |
| ZNF217   | <a href="#">113258297</a> | -4.80542716 | -2.26466 | 1.59E-07 | 1.41E-06 |
| CPOX     | <a href="#">113250381</a> | -4.80613327 | -2.26488 | 1.56E-05 | 9.41E-05 |
| NFKBIE   | <a href="#">113261039</a> | -4.80634034 | -2.26494 | 7.02E-07 | 5.51E-06 |
| ME1      | <a href="#">113261331</a> | -4.81518911 | -2.26759 | 0.010397 | 0.028859 |
| RPGRIP1L | <a href="#">113252239</a> | -4.82351724 | -2.27009 | 9.49E-06 | 6.02E-05 |
| RUNX2    | <a href="#">113261240</a> | -4.82702818 | -2.27114 | 0.003338 | 0.010972 |
| GLCCI1   | <a href="#">113260511</a> | -4.82772115 | -2.27134 | 5.02E-07 | 4.04E-06 |
| IRAK3    | <a href="#">113256312</a> | -4.83142602 | -2.27245 | 4.49E-06 | 3.05E-05 |
| SLC25A5  | <a href="#">113241271</a> | -4.84087608 | -2.27527 | 6.47E-09 | 7.34E-08 |
| ARPC1B   | <a href="#">113267914</a> | -4.84116305 | -2.27535 | 5.56E-06 | 3.71E-05 |
| FIGNL1   | <a href="#">113257549</a> | -4.84172218 | -2.27552 | 6.72E-05 | 0.00035  |
| KCNQ1    | <a href="#">113243965</a> | -4.8457246  | -2.27671 | 9.72E-08 | 8.97E-07 |
| PUS10    | <a href="#">113245273</a> | -4.85008273 | -2.27801 | 3.05E-06 | 2.13E-05 |

|              |                           |             |          |          |          |
|--------------|---------------------------|-------------|----------|----------|----------|
| ALMS1        | <a href="#">113243949</a> | -4.85053978 | -2.27815 | 3.48E-06 | 2.41E-05 |
| MPZL3        | <a href="#">113260004</a> | -4.85636967 | -2.27988 | 0.00243  | 0.008338 |
| LOC113247266 | <a href="#">113247266</a> | -4.85796843 | -2.28035 | 7.47E-05 | 0.000385 |
| LOC113257657 | <a href="#">113257657</a> | -4.85852725 | -2.28052 | 0.001284 | 0.004794 |
| MNS1         | <a href="#">113269659</a> | -4.86255681 | -2.28172 | 0.000256 | 0.001159 |
| RP2          | <a href="#">113265987</a> | -4.87469312 | -2.28531 | 5.3E-09  | 6.11E-08 |
| ALDH16A1     | <a href="#">113243301</a> | -4.88413825 | -2.2881  | 9.82E-10 | 1.32E-08 |
| ERAP2        | <a href="#">113255061</a> | -4.88429129 | -2.28815 | 4.6E-08  | 4.52E-07 |
| PPOX         | <a href="#">113246728</a> | -4.89968964 | -2.29269 | 7.91E-08 | 7.47E-07 |
| RNPEP        | <a href="#">113242543</a> | -4.90133629 | -2.29318 | 2.55E-09 | 3.15E-08 |
| DNASE1L3     | <a href="#">113257014</a> | -4.90681401 | -2.29479 | 0.001351 | 0.005013 |
| ARMH4        | <a href="#">113242325</a> | -4.91474418 | -2.29712 | 0.000273 | 0.001228 |
| MAPK13       | <a href="#">113243854</a> | -4.91583591 | -2.29744 | 9.94E-06 | 6.29E-05 |
| SH3BGRL      | <a href="#">113242157</a> | -4.91675586 | -2.29771 | 3.8E-08  | 3.78E-07 |
| HDAC1        | <a href="#">113268357</a> | -4.93141192 | -2.302   | 2.46E-07 | 2.1E-06  |
| MFSD12       | <a href="#">113242802</a> | -4.95953768 | -2.31021 | 4.01E-09 | 4.72E-08 |
| ARPC3        | <a href="#">113266963</a> | -4.9620916  | -2.31095 | 1.98E-07 | 1.72E-06 |
| PFN1         | <a href="#">113271075</a> | -4.96985098 | -2.3132  | 2.42E-05 | 0.000139 |
| ARHGAP19     | <a href="#">113251776</a> | -4.97329841 | -2.3142  | 1.98E-06 | 1.43E-05 |
| BLVRA        | <a href="#">113257951</a> | -4.97557496 | -2.31486 | 9.41E-10 | 1.27E-08 |
| IQCD         | <a href="#">113266992</a> | -4.97949272 | -2.316   | 0.000185 | 0.000871 |
| TYK2         | <a href="#">113242985</a> | -4.98174544 | -2.31665 | 9.33E-07 | 7.16E-06 |
| IFI30        | <a href="#">113256708</a> | -4.99042006 | -2.31916 | 3.25E-08 | 3.26E-07 |
| IDO1         | <a href="#">113245545</a> | -4.99086004 | -2.31929 | 0.005398 | 0.016638 |
| AGPAT2       | <a href="#">113248634</a> | -5.00456762 | -2.32325 | 8.25E-05 | 0.000422 |
| FECH         | <a href="#">113253451</a> | -5.00788914 | -2.3242  | 0.000333 | 0.001462 |
| CRLF3        | <a href="#">113268998</a> | -5.00908022 | -2.32455 | 2.7E-09  | 3.31E-08 |
| IGFBP2       | <a href="#">113250479</a> | -5.02843392 | -2.33011 | 0.000879 | 0.003439 |

|              |                           |             |          |          |          |
|--------------|---------------------------|-------------|----------|----------|----------|
| CENPQ        | <a href="#">113261211</a> | -5.03269704 | -2.33133 | 9.01E-06 | 5.75E-05 |
| LOC113245122 | <a href="#">113245122</a> | -5.04662653 | -2.33532 | 1.09E-05 | 6.81E-05 |
| BLM          | <a href="#">113263720</a> | -5.04663779 | -2.33532 | 3.28E-06 | 2.28E-05 |
| SHKBP1       | <a href="#">113243561</a> | -5.0488328  | -2.33595 | 6.07E-10 | 8.47E-09 |
| RUNDC3A      | <a href="#">113265355</a> | -5.05653113 | -2.33815 | 7.23E-05 | 0.000375 |
| RPE          | <a href="#">113250510</a> | -5.06251598 | -2.33985 | 1.18E-09 | 1.56E-08 |
| SAMD9L       | <a href="#">113259987</a> | -5.0684277  | -2.34154 | 5.94E-09 | 6.78E-08 |
| LOC113248368 | <a href="#">113248368</a> | -5.08184901 | -2.34535 | 1.84E-05 | 0.000109 |
| BLNK         | <a href="#">113251766</a> | -5.08246225 | -2.34553 | 8.35E-06 | 5.37E-05 |
| RNF149       | <a href="#">113247198</a> | -5.09197364 | -2.34822 | 5.27E-07 | 4.22E-06 |
| SMIM5        | <a href="#">113244631</a> | -5.09341454 | -2.34863 | 0.000873 | 0.003419 |
| KLB          | <a href="#">113262421</a> | -5.09693765 | -2.34963 | 0.000266 | 0.001198 |
| CUNH9orf40   | <a href="#">113269847</a> | -5.1041085  | -2.35166 | 1.58E-07 | 1.41E-06 |
| PLAUR        | <a href="#">113243488</a> | -5.10527905 | -2.35199 | 2.49E-06 | 1.77E-05 |
| SLC15A3      | <a href="#">113246988</a> | -5.1099094  | -2.3533  | 9.74E-09 | 1.07E-07 |
| SLC1A5       | <a href="#">113243390</a> | -5.1151607  | -2.35478 | 2.57E-09 | 3.16E-08 |
| HAVCR1       | <a href="#">113264012</a> | -5.11671166 | -2.35522 | 1.1E-05  | 6.88E-05 |
| LPL          | <a href="#">113270022</a> | -5.13840044 | -2.36132 | 0.010894 | 0.029999 |
| WIF1         | <a href="#">113256324</a> | -5.15710655 | -2.36656 | 0.000596 | 0.002449 |
| KLRD1        | <a href="#">113257897</a> | -5.16897949 | -2.36988 | 3.01E-05 | 0.000169 |
| TTC7A        | <a href="#">113245984</a> | -5.16989753 | -2.37014 | 1.28E-08 | 1.37E-07 |
| RAB11FIP4    | <a href="#">113269005</a> | -5.1759279  | -2.37182 | 0.000357 | 0.001557 |
| TAP2         | <a href="#">113243780</a> | -5.18055245 | -2.37311 | 6.91E-09 | 7.78E-08 |
| LOC113243784 | <a href="#">113243784</a> | -5.1833694  | -2.37389 | 1.49E-07 | 1.33E-06 |
| LXN          | <a href="#">113254121</a> | -5.18987876 | -2.3757  | 8.49E-09 | 9.46E-08 |
| FNDC10       | <a href="#">113270684</a> | -5.19286442 | -2.37653 | 6.67E-07 | 5.25E-06 |
| LOXL3        | <a href="#">113243508</a> | -5.19351395 | -2.37671 | 1.98E-05 | 0.000116 |
| MSRA         | <a href="#">113269936</a> | -5.20192177 | -2.37904 | 5.16E-10 | 7.32E-09 |

|              |                           |             |          |          |          |
|--------------|---------------------------|-------------|----------|----------|----------|
| CENPM        | <a href="#">113241713</a> | -5.20431254 | -2.37971 | 1.71E-07 | 1.51E-06 |
| F13A1        | <a href="#">113264421</a> | -5.20563993 | -2.38008 | 7.5E-10  | 1.03E-08 |
| PTPRCAP      | <a href="#">113244029</a> | -5.2109879  | -2.38156 | 8.08E-07 | 6.27E-06 |
| LOC113247025 | <a href="#">113247025</a> | -5.21151771 | -2.3817  | 0.000434 | 0.001846 |
| LOC113258964 | <a href="#">113258964</a> | -5.21385449 | -2.38235 | 1.73E-08 | 1.82E-07 |
| PTPRE        | <a href="#">113252056</a> | -5.21535037 | -2.38276 | 1.22E-08 | 1.33E-07 |
| CDK2         | <a href="#">113256451</a> | -5.21645411 | -2.38307 | 9.97E-08 | 9.19E-07 |
| ABTB1        | <a href="#">113257272</a> | -5.21928959 | -2.38385 | 5.2E-07  | 4.17E-06 |
| LOC113253437 | <a href="#">113253437</a> | -5.22163018 | -2.3845  | 0.00155  | 0.005653 |
| RNASEL       | <a href="#">113262726</a> | -5.22955394 | -2.38669 | 4.91E-09 | 5.72E-08 |
| LOC113244439 | <a href="#">113244439</a> | -5.23107253 | -2.38711 | 7.39E-05 | 0.000382 |
| CLIC1        | <a href="#">113243757</a> | -5.23119889 | -2.38714 | 1.3E-07  | 1.17E-06 |
| TAF8         | <a href="#">113261300</a> | -5.23135485 | -2.38718 | 3.54E-07 | 2.92E-06 |
| NMI          | <a href="#">113250889</a> | -5.23662703 | -2.38864 | 1.37E-09 | 1.79E-08 |
| LYN          | <a href="#">113268089</a> | -5.2509535  | -2.39258 | 2.99E-09 | 3.63E-08 |
| LOC113264274 | <a href="#">113264274</a> | -5.25228394 | -2.39294 | 1.84E-05 | 0.000109 |
| MARCH8       | <a href="#">113243122</a> | -5.25565708 | -2.39387 | 4.14E-08 | 4.1E-07  |
| HES6         | <a href="#">113250049</a> | -5.26073291 | -2.39526 | 0.000101 | 0.000507 |
| LOC113264493 | <a href="#">113264493</a> | -5.2615335  | -2.39548 | 1.25E-08 | 1.35E-07 |
| PON2         | <a href="#">113260347</a> | -5.26306792 | -2.3959  | 8.45E-07 | 6.53E-06 |
| SLC6A4       | <a href="#">113269085</a> | -5.26732044 | -2.39707 | 4.62E-07 | 3.75E-06 |
| TSPO         | <a href="#">113241678</a> | -5.27675079 | -2.39965 | 1.62E-05 | 9.72E-05 |
| ST6GAL1      | <a href="#">113253796</a> | -5.27898845 | -2.40026 | 5.33E-08 | 5.18E-07 |
| RCC2         | <a href="#">113270442</a> | -5.28257508 | -2.40124 | 2.74E-08 | 2.77E-07 |
| SPTLC2       | <a href="#">113270285</a> | -5.28536019 | -2.402   | 7.92E-08 | 7.48E-07 |
| CD3D         | <a href="#">113260002</a> | -5.2895822  | -2.40315 | 4.36E-05 | 0.000236 |
| RPP25        | <a href="#">113240982</a> | -5.29163685 | -2.40371 | 7.44E-05 | 0.000384 |
| LOC113249521 | <a href="#">113249521</a> | -5.30337679 | -2.40691 | 2.47E-05 | 0.000141 |

|              |                           |             |          |          |          |
|--------------|---------------------------|-------------|----------|----------|----------|
| LOC113249511 | <a href="#">113249511</a> | -5.30371017 | -2.407   | 1.44E-06 | 1.06E-05 |
| DCLRE1C      | <a href="#">113241390</a> | -5.30481391 | -2.4073  | 9.84E-08 | 9.07E-07 |
| MOB3A        | <a href="#">113242756</a> | -5.3048879  | -2.40732 | 1.19E-09 | 1.57E-08 |
| LOC113246872 | <a href="#">113246872</a> | -5.30900289 | -2.40844 | 8.13E-06 | 5.23E-05 |
| FANCL        | <a href="#">113245380</a> | -5.31026317 | -2.40878 | 1.59E-07 | 1.42E-06 |
| LOC113251097 | <a href="#">113251097</a> | -5.31352808 | -2.40967 | 4.42E-07 | 3.6E-06  |
| PABPC1       | <a href="#">113252872</a> | -5.32278173 | -2.41218 | 0.000713 | 0.00287  |
| METTL4       | <a href="#">113253257</a> | -5.33386783 | -2.41518 | 2.17E-05 | 0.000126 |
| SLC37A2      | <a href="#">113259908</a> | -5.33492041 | -2.41547 | 6.55E-06 | 4.31E-05 |
| LRRC8D       | <a href="#">113254428</a> | -5.33976429 | -2.41678 | 1.38E-09 | 1.8E-08  |
| CX3CR1       | <a href="#">113253798</a> | -5.34073747 | -2.41704 | 6.01E-08 | 5.77E-07 |
| IDNK         | <a href="#">113269814</a> | -5.34440218 | -2.41803 | 1.29E-06 | 9.63E-06 |
| TEC          | <a href="#">113262469</a> | -5.35109797 | -2.41983 | 7E-06    | 4.58E-05 |
| BATF3        | <a href="#">113262678</a> | -5.35316844 | -2.42039 | 0.000118 | 0.00058  |
| SATB2        | <a href="#">113250620</a> | -5.35763427 | -2.4216  | 0.006779 | 0.02016  |
| SPIDR        | <a href="#">113268121</a> | -5.36059326 | -2.42239 | 2.35E-07 | 2.01E-06 |
| PIK3AP1      | <a href="#">113251772</a> | -5.36990621 | -2.4249  | 1.13E-07 | 1.02E-06 |
| TESC         | <a href="#">113267012</a> | -5.38090656 | -2.42785 | 0.000266 | 0.001199 |
| ITGB3BP      | <a href="#">113254585</a> | -5.38174549 | -2.42807 | 2.39E-06 | 1.7E-05  |
| BRI3BP       | <a href="#">113266871</a> | -5.38305837 | -2.42843 | 2.48E-10 | 3.73E-09 |
| TALDO1       | <a href="#">113248794</a> | -5.38610837 | -2.42924 | 3.52E-06 | 2.44E-05 |
| LOC113241124 | <a href="#">113241124</a> | -5.38633768 | -2.4293  | 0.000469 | 0.001978 |
| ADAP1        | <a href="#">113247735</a> | -5.38654655 | -2.42936 | 2.48E-06 | 1.76E-05 |
| VPS26B       | <a href="#">113259848</a> | -5.39491865 | -2.4316  | 1.69E-07 | 1.49E-06 |
| SP110        | <a href="#">113250368</a> | -5.39730349 | -2.43224 | 1.22E-06 | 9.14E-06 |
| CAPNS2       | <a href="#">113252251</a> | -5.39958694 | -2.43285 | 0.000417 | 0.001783 |
| FANCG        | <a href="#">113260492</a> | -5.42669666 | -2.44007 | 2.47E-08 | 2.53E-07 |
| ALPL         | <a href="#">113268551</a> | -5.44000123 | -2.44361 | 0.007587 | 0.022202 |

|         |                           |             |          |          |          |
|---------|---------------------------|-------------|----------|----------|----------|
| EXD1    | <a href="#">113242013</a> | -5.44308994 | -2.44443 | 0.001595 | 0.005793 |
| DNM3    | <a href="#">113262829</a> | -5.44478952 | -2.44488 | 4.64E-09 | 5.42E-08 |
| CFL1    | <a href="#">113244093</a> | -5.45162687 | -2.44669 | 3.61E-05 | 0.000199 |
| NCAPG2  | <a href="#">113241531</a> | -5.45234196 | -2.44688 | 1.77E-08 | 1.86E-07 |
| ADORA2B | <a href="#">113271262</a> | -5.47009774 | -2.45157 | 8.61E-06 | 5.52E-05 |
| ADCY7   | <a href="#">113252223</a> | -5.47609411 | -2.45315 | 1.7E-08  | 1.8E-07  |
| CRELD2  | <a href="#">113241628</a> | -5.48075868 | -2.45438 | 6.52E-10 | 9.05E-09 |
| CD74    | <a href="#">113263948</a> | -5.4822713  | -2.45477 | 2.6E-06  | 1.84E-05 |
| SAT1    | <a href="#">113242226</a> | -5.48608164 | -2.45578 | 1.56E-09 | 2.01E-08 |
| LITAF   | <a href="#">113270792</a> | -5.49262102 | -2.45749 | 4.26E-09 | 5E-08    |
| FES     | <a href="#">113263718</a> | -5.50211183 | -2.45999 | 2.55E-08 | 2.6E-07  |
| CENPH   | <a href="#">113255259</a> | -5.50617238 | -2.46105 | 2.61E-08 | 2.66E-07 |
| CIITA   | <a href="#">113270802</a> | -5.51392386 | -2.46308 | 1.55E-07 | 1.39E-06 |
| PDLIM2  | <a href="#">113269998</a> | -5.51454325 | -2.46324 | 8.48E-05 | 0.000433 |
| TMPO    | <a href="#">113256114</a> | -5.51773713 | -2.46408 | 1.12E-05 | 7E-05    |
| GPR183  | <a href="#">113251493</a> | -5.53036199 | -2.46737 | 0.000146 | 0.000702 |
| SEPT5   | <a href="#">113245887</a> | -5.5306652  | -2.46745 | 1.78E-09 | 2.26E-08 |
| F12     | <a href="#">113264151</a> | -5.53746803 | -2.46923 | 4.57E-07 | 3.71E-06 |
| TDRD6   | <a href="#">113261231</a> | -5.55682767 | -2.47426 | 2.16E-05 | 0.000126 |
| PPARG   | <a href="#">113257185</a> | -5.5588066  | -2.47478 | 9.99E-06 | 6.31E-05 |
| CHAC2   | <a href="#">113245835</a> | -5.56879187 | -2.47736 | 4.46E-05 | 0.000241 |
| KIF20B  | <a href="#">113243153</a> | -5.56890039 | -2.47739 | 1.17E-07 | 1.06E-06 |
| CAP1    | <a href="#">113268237</a> | -5.57529487 | -2.47905 | 5.56E-06 | 3.71E-05 |
| SNCG    | <a href="#">113259249</a> | -5.5768937  | -2.47946 | 0.011843 | 0.032267 |
| RASGRP1 | <a href="#">113242056</a> | -5.58624475 | -2.48188 | 5.01E-05 | 0.000268 |
| LOXL2   | <a href="#">113269985</a> | -5.58858814 | -2.48248 | 0.002148 | 0.007495 |
| CARD9   | <a href="#">113248628</a> | -5.59109138 | -2.48313 | 4.35E-05 | 0.000235 |
| FANCF   | <a href="#">113265106</a> | -5.6027188  | -2.48613 | 1.89E-07 | 1.65E-06 |

|              |                           |             |          |          |          |
|--------------|---------------------------|-------------|----------|----------|----------|
| TNFRSF14     | <a href="#">113270606</a> | -5.60376831 | -2.4864  | 1.14E-07 | 1.04E-06 |
| AP3S1        | <a href="#">113261609</a> | -5.609922   | -2.48798 | 4.96E-09 | 5.77E-08 |
| NIN          | <a href="#">113266216</a> | -5.61136155 | -2.48835 | 3.85E-09 | 4.56E-08 |
| FLVCR2       | <a href="#">113270311</a> | -5.61699763 | -2.4898  | 0.000145 | 0.000698 |
| RETSAT       | <a href="#">113243209</a> | -5.62926739 | -2.49295 | 7.4E-07  | 5.79E-06 |
| CPVL         | <a href="#">113262172</a> | -5.63304453 | -2.49391 | 3.94E-07 | 3.23E-06 |
| KCNK3        | <a href="#">113270882</a> | -5.63434319 | -2.49425 | 0.003744 | 0.012107 |
| RAB20        | <a href="#">113251540</a> | -5.65927048 | -2.50062 | 1.61E-05 | 9.67E-05 |
| R3HDM4       | <a href="#">113242708</a> | -5.65958452 | -2.5007  | 4.05E-06 | 2.78E-05 |
| CUNH11orf86  | <a href="#">113244046</a> | -5.66033881 | -2.50089 | 0.008949 | 0.025438 |
| SDF2L1       | <a href="#">113247034</a> | -5.66386158 | -2.50179 | 1.56E-07 | 1.4E-06  |
| OTULINL      | <a href="#">113260832</a> | -5.66854022 | -2.50298 | 5.87E-10 | 8.22E-09 |
| FXYD5        | <a href="#">113244829</a> | -5.6724005  | -2.50396 | 1.24E-09 | 1.62E-08 |
| FAM122B      | <a href="#">113270975</a> | -5.68029534 | -2.50597 | 3.24E-08 | 3.26E-07 |
| SLC16A7      | <a href="#">113256349</a> | -5.69845455 | -2.51057 | 6.21E-09 | 7.07E-08 |
| LOC113248579 | <a href="#">113248579</a> | -5.70075349 | -2.51115 | 1.44E-05 | 8.76E-05 |
| ADCY5        | <a href="#">113252326</a> | -5.70627411 | -2.51255 | 4.04E-05 | 0.00022  |
| VRK1         | <a href="#">113267288</a> | -5.70762212 | -2.51289 | 5.73E-08 | 5.53E-07 |
| LPIN2        | <a href="#">113253253</a> | -5.71461188 | -2.51466 | 2.58E-09 | 3.17E-08 |
| ASNS         | <a href="#">113260459</a> | -5.71641494 | -2.51511 | 4.68E-09 | 5.47E-08 |
| ARHGEF1      | <a href="#">113243505</a> | -5.71902836 | -2.51577 | 1.55E-06 | 1.14E-05 |
| IFITM5       | <a href="#">113248811</a> | -5.72280433 | -2.51672 | 0.003623 | 0.011784 |
| FRAT2        | <a href="#">113251778</a> | -5.72526443 | -2.51734 | 1.04E-08 | 1.14E-07 |
| GALNT7       | <a href="#">113269901</a> | -5.7266051  | -2.51768 | 1.73E-08 | 1.82E-07 |
| XRCC2        | <a href="#">113241505</a> | -5.73055529 | -2.51867 | 1.39E-05 | 8.51E-05 |
| RTP4         | <a href="#">113253777</a> | -5.73376238 | -2.51948 | 1.25E-06 | 9.34E-06 |
| PADI3        | <a href="#">113270444</a> | -5.73969842 | -2.52097 | 9.04E-08 | 8.41E-07 |
| CITED4       | <a href="#">113254823</a> | -5.74011599 | -2.52108 | 1.74E-07 | 1.53E-06 |

|              |                           |             |          |          |          |
|--------------|---------------------------|-------------|----------|----------|----------|
| UBASH3B      | <a href="#">113259933</a> | -5.74487326 | -2.52228 | 2.43E-07 | 2.07E-06 |
| VSIG4        | <a href="#">113246902</a> | -5.7607354  | -2.52625 | 1.25E-09 | 1.64E-08 |
| APAF1        | <a href="#">113256111</a> | -5.78177761 | -2.53151 | 1.13E-07 | 1.03E-06 |
| MDM1         | <a href="#">113256303</a> | -5.78342924 | -2.53193 | 6.58E-07 | 5.19E-06 |
| FAM111B      | <a href="#">113246546</a> | -5.78460886 | -2.53222 | 5.3E-10  | 7.51E-09 |
| SLC2A8       | <a href="#">113266423</a> | -5.79155392 | -2.53395 | 2.25E-08 | 2.31E-07 |
| LOC113243779 | <a href="#">113243779</a> | -5.79224903 | -2.53412 | 6.39E-05 | 0.000335 |
| BASP1        | <a href="#">113260843</a> | -5.79976727 | -2.536   | 0.000298 | 0.001329 |
| CXCL12       | <a href="#">113243131</a> | -5.80711277 | -2.53782 | 0.002408 | 0.008263 |
| MFHAS1       | <a href="#">113262185</a> | -5.81103731 | -2.5388  | 3.31E-09 | 3.98E-08 |
| ELOVL1       | <a href="#">113254789</a> | -5.81458024 | -2.53968 | 5.13E-10 | 7.29E-09 |
| ADGRG3       | <a href="#">113252291</a> | -5.81605192 | -2.54004 | 2.15E-06 | 1.54E-05 |
| IL21R        | <a href="#">113267611</a> | -5.82886372 | -2.54321 | 4.03E-05 | 0.000219 |
| GCLC         | <a href="#">113261177</a> | -5.83271288 | -2.54417 | 5.06E-07 | 4.07E-06 |
| MGAT5        | <a href="#">113263431</a> | -5.84396849 | -2.54695 | 8.57E-08 | 8.01E-07 |
| LOC113246352 | <a href="#">113246352</a> | -5.84413289 | -2.54699 | 5.3E-06  | 3.55E-05 |
| CDR2         | <a href="#">113267558</a> | -5.85186687 | -2.5489  | 3.12E-08 | 3.14E-07 |
| ADRB1        | <a href="#">113251957</a> | -5.86022533 | -2.55096 | 2.46E-05 | 0.000141 |
| CUNH15orf39  | <a href="#">113240987</a> | -5.86725296 | -2.55269 | 1.88E-07 | 1.64E-06 |
| CSRP2        | <a href="#">113256237</a> | -5.87020945 | -2.55341 | 0.001957 | 0.006897 |
| PLA2G4A      | <a href="#">113262763</a> | -5.87734966 | -2.55517 | 1.02E-10 | 1.64E-09 |
| DSCC1        | <a href="#">113252776</a> | -5.88649084 | -2.55741 | 5.59E-10 | 7.88E-09 |
| BPGM         | <a href="#">113264369</a> | -5.88863169 | -2.55793 | 1.43E-06 | 1.06E-05 |
| SLC35F1      | <a href="#">113259662</a> | -5.89406857 | -2.55926 | 1.92E-05 | 0.000113 |
| GPCPD1       | <a href="#">113258363</a> | -5.91237797 | -2.56374 | 1.91E-09 | 2.42E-08 |
| CAMK4        | <a href="#">113254999</a> | -5.91406071 | -2.56415 | 7.72E-05 | 0.000397 |
| FAM166B      | <a href="#">113260482</a> | -5.9148024  | -2.56433 | 0.001519 | 0.005555 |
| RHOG         | <a href="#">113269253</a> | -5.92020885 | -2.56565 | 5.81E-10 | 8.15E-09 |

|              |                           |             |          |          |          |
|--------------|---------------------------|-------------|----------|----------|----------|
| LOC113247364 | <a href="#">113247364</a> | -5.92766282 | -2.56746 | 3.42E-05 | 0.000189 |
| IL16         | <a href="#">113263766</a> | -5.95149247 | -2.57325 | 2.1E-07  | 1.81E-06 |
| ARPC5        | <a href="#">113262738</a> | -5.96087362 | -2.57552 | 2.12E-07 | 1.83E-06 |
| RUNX1        | <a href="#">113262125</a> | -5.9807967  | -2.58034 | 1.28E-05 | 7.87E-05 |
| MST1         | <a href="#">113256881</a> | -5.98140111 | -2.58048 | 9.17E-05 | 0.000463 |
| LOC113261057 | <a href="#">113261057</a> | -5.98278914 | -2.58082 | 1.65E-09 | 2.11E-08 |
| CUNH6orf141  | <a href="#">113261209</a> | -5.99070208 | -2.58273 | 0.000244 | 0.00111  |
| LOC113252091 | <a href="#">113252091</a> | -5.99752313 | -2.58437 | 2.94E-07 | 2.47E-06 |
| PHF7         | <a href="#">113256952</a> | -5.99805684 | -2.5845  | 5.57E-06 | 3.71E-05 |
| ZNF367       | <a href="#">113269774</a> | -5.99924195 | -2.58478 | 5.82E-09 | 6.66E-08 |
| ISM1         | <a href="#">113258332</a> | -6.00117695 | -2.58525 | 1.45E-05 | 8.81E-05 |
| PADI6        | <a href="#">113270662</a> | -6.00179004 | -2.58539 | 2.86E-05 | 0.000162 |
| TUBAL3       | <a href="#">113241127</a> | -6.0038978  | -2.5859  | 4.67E-05 | 0.000251 |
| WDR90        | <a href="#">113245385</a> | -6.00760753 | -2.58679 | 2.68E-07 | 2.27E-06 |
| TCIRG1       | <a href="#">113244006</a> | -6.00869453 | -2.58705 | 1.06E-08 | 1.16E-07 |
| ACTN1        | <a href="#">113270401</a> | -6.01185479 | -2.58781 | 1.13E-05 | 7.05E-05 |
| CKAP4        | <a href="#">113256046</a> | -6.01301463 | -2.58809 | 1.43E-06 | 1.06E-05 |
| EPB41        | <a href="#">113268397</a> | -6.01559381 | -2.58871 | 4.3E-07  | 3.51E-06 |
| CD44         | <a href="#">113265043</a> | -6.03151344 | -2.59252 | 8.48E-10 | 1.15E-08 |
| SPINT1       | <a href="#">113242021</a> | -6.04544369 | -2.59585 | 2.34E-06 | 1.67E-05 |
| CD68         | <a href="#">113271154</a> | -6.04663989 | -2.59613 | 3.15E-05 | 0.000176 |
| SLC2A6       | <a href="#">113266569</a> | -6.04984019 | -2.5969  | 1.71E-08 | 1.81E-07 |
| TXNRD3       | <a href="#">113257278</a> | -6.05094601 | -2.59716 | 0.000658 | 0.002674 |
| RBBP8        | <a href="#">113253281</a> | -6.05580915 | -2.59832 | 1.46E-09 | 1.89E-08 |
| SYN2         | <a href="#">113257181</a> | -6.05977828 | -2.59927 | 0.000475 | 0.002002 |
| ALDH1L2      | <a href="#">113255960</a> | -6.0733673  | -2.6025  | 2.43E-05 | 0.000139 |
| SPP1         | <a href="#">113263166</a> | -6.08425603 | -2.60508 | 0.007331 | 0.021542 |
| ALDH18A1     | <a href="#">113251756</a> | -6.08938925 | -2.6063  | 3.06E-10 | 4.53E-09 |

|              |                           |             |          |          |          |
|--------------|---------------------------|-------------|----------|----------|----------|
| TMC6         | <a href="#">113244576</a> | -6.09473715 | -2.60756 | 2.14E-08 | 2.21E-07 |
| LPXN         | <a href="#">113246554</a> | -6.09592711 | -2.60785 | 1.96E-08 | 2.05E-07 |
| LOC113248575 | <a href="#">113248575</a> | -6.09984353 | -2.60877 | 1.38E-05 | 8.44E-05 |
| TNFRSF1B     | <a href="#">113270492</a> | -6.10330235 | -2.60959 | 4.75E-11 | 8.09E-10 |
| CENPX        | <a href="#">113244490</a> | -6.11195434 | -2.61163 | 5.69E-09 | 6.52E-08 |
| BGLAP        | <a href="#">113245244</a> | -6.12168943 | -2.61393 | 0.008404 | 0.024146 |
| IDH1         | <a href="#">113250517</a> | -6.12383634 | -2.61444 | 5.27E-08 | 5.12E-07 |
| GPBAR1       | <a href="#">113250466</a> | -6.12884825 | -2.61562 | 1.33E-05 | 8.15E-05 |
| GPR152       | <a href="#">113243918</a> | -6.12909574 | -2.61567 | 0.000478 | 0.002015 |
| TUBB         | <a href="#">113264352</a> | -6.14904452 | -2.62036 | 0.000188 | 0.000879 |
| CPA3         | <a href="#">113254040</a> | -6.15432098 | -2.6216  | 1.02E-06 | 7.79E-06 |
| NME4         | <a href="#">113245373</a> | -6.16388571 | -2.62384 | 2.09E-07 | 1.81E-06 |
| MXD1         | <a href="#">113244487</a> | -6.16788072 | -2.62477 | 4.33E-06 | 2.95E-05 |
| CAPG         | <a href="#">113243184</a> | -6.17072593 | -2.62544 | 2.85E-10 | 4.26E-09 |
| SCPEP1       | <a href="#">113268848</a> | -6.17221132 | -2.62579 | 2.89E-10 | 4.32E-09 |
| PYCR1        | <a href="#">113244492</a> | -6.17548972 | -2.62655 | 9.35E-08 | 8.65E-07 |
| MXD3         | <a href="#">113264140</a> | -6.18266939 | -2.62823 | 7.52E-08 | 7.14E-07 |
| IRF8         | <a href="#">113252179</a> | -6.18882236 | -2.62966 | 7.51E-10 | 1.03E-08 |
| RGS14        | <a href="#">113264145</a> | -6.18958748 | -2.62984 | 1.93E-07 | 1.68E-06 |
| MARCH2       | <a href="#">113242900</a> | -6.19047282 | -2.63005 | 9.54E-10 | 1.28E-08 |
| SCML2        | <a href="#">113242257</a> | -6.19562002 | -2.63125 | 1.63E-05 | 9.78E-05 |
| DBF4B        | <a href="#">113265346</a> | -6.20531641 | -2.6335  | 0.000101 | 0.000508 |
| LOC113250367 | <a href="#">113250367</a> | -6.20691468 | -2.63388 | 1.17E-10 | 1.86E-09 |
| CAPZA1       | <a href="#">113244421</a> | -6.20777246 | -2.63408 | 1.83E-08 | 1.92E-07 |
| ADM5         | <a href="#">113243288</a> | -6.21088745 | -2.6348  | 2.35E-05 | 0.000136 |
| ACER3        | <a href="#">113269345</a> | -6.21231281 | -2.63513 | 1.96E-10 | 3E-09    |
| ZNF710       | <a href="#">113263703</a> | -6.21769206 | -2.63638 | 3.98E-09 | 4.69E-08 |
| ELF4         | <a href="#">113270951</a> | -6.21990362 | -2.63689 | 3.49E-07 | 2.89E-06 |

|              |                           |             |          |          |          |
|--------------|---------------------------|-------------|----------|----------|----------|
| LOC113244473 | <a href="#">113244473</a> | -6.22263235 | -2.63753 | 1.24E-10 | 1.95E-09 |
| LOC113243777 | <a href="#">113243777</a> | -6.22986014 | -2.6392  | 5.59E-08 | 5.4E-07  |
| POLQ         | <a href="#">113252082</a> | -6.23344885 | -2.64003 | 6.36E-06 | 4.19E-05 |
| EMILIN2      | <a href="#">113253252</a> | -6.24019225 | -2.64159 | 1.74E-07 | 1.53E-06 |
| DGKA         | <a href="#">113256448</a> | -6.24067975 | -2.6417  | 8.84E-09 | 9.83E-08 |
| SLC12A9      | <a href="#">113267841</a> | -6.24178195 | -2.64196 | 5.67E-07 | 4.52E-06 |
| CD5          | <a href="#">113246919</a> | -6.25771373 | -2.64564 | 0.000112 | 0.000555 |
| KIF24        | <a href="#">113260654</a> | -6.25961457 | -2.64607 | 5.28E-05 | 0.000282 |
| ENO1         | <a href="#">113270547</a> | -6.26020402 | -2.64621 | 1.62E-05 | 9.71E-05 |
| ANKRD44      | <a href="#">113250630</a> | -6.27020007 | -2.64851 | 5.61E-09 | 6.43E-08 |
| LOC113246145 | <a href="#">113246145</a> | -6.27185488 | -2.64889 | 5.57E-08 | 5.39E-07 |
| SLC39A11     | <a href="#">113265219</a> | -6.28228164 | -2.65129 | 7.91E-10 | 1.08E-08 |
| CIDEA        | <a href="#">113245954</a> | -6.28565602 | -2.65206 | 0.000359 | 0.001565 |
| FKBP11       | <a href="#">113257665</a> | -6.28880761 | -2.65279 | 3.22E-08 | 3.24E-07 |
| POLD1        | <a href="#">113247242</a> | -6.30356309 | -2.65617 | 4.97E-09 | 5.77E-08 |
| OMP          | <a href="#">113269350</a> | -6.3236411  | -2.66076 | 8.61E-05 | 0.000438 |
| GALNS        | <a href="#">113252143</a> | -6.32891102 | -2.66196 | 3.92E-10 | 5.71E-09 |
| SECTM1       | <a href="#">113244474</a> | -6.33093652 | -2.66242 | 1.27E-05 | 7.85E-05 |
| NANP         | <a href="#">113248364</a> | -6.33193416 | -2.66265 | 1.61E-06 | 1.18E-05 |
| NPY          | <a href="#">113261579</a> | -6.33406532 | -2.66313 | 0.000911 | 0.00355  |
| LOC113249383 | <a href="#">113249383</a> | -6.33409584 | -2.66314 | 1.75E-05 | 0.000104 |
| VWA5A        | <a href="#">113259924</a> | -6.33655366 | -2.6637  | 4.3E-11  | 7.37E-10 |
| DDX11        | <a href="#">113258026</a> | -6.34366512 | -2.66532 | 2.7E-08  | 2.74E-07 |
| DGAT1        | <a href="#">113247638</a> | -6.35514609 | -2.66793 | 3.1E-09  | 3.75E-08 |
| VAV3         | <a href="#">113244955</a> | -6.35753519 | -2.66847 | 7.58E-09 | 8.49E-08 |
| CENPP        | <a href="#">113270095</a> | -6.36665245 | -2.67054 | 9.99E-06 | 6.31E-05 |
| HMBS         | <a href="#">113259975</a> | -6.37632331 | -2.67272 | 3.11E-06 | 2.17E-05 |
| GCH1         | <a href="#">113242352</a> | -6.37780163 | -2.67306 | 6.87E-05 | 0.000358 |

|              |                           |             |          |          |          |
|--------------|---------------------------|-------------|----------|----------|----------|
| PCBP3        | <a href="#">113264451</a> | -6.39299768 | -2.67649 | 7.46E-06 | 4.85E-05 |
| CTSS         | <a href="#">113246210</a> | -6.41422357 | -2.68127 | 1.39E-08 | 1.49E-07 |
| LRFN1        | <a href="#">113243595</a> | -6.4196688  | -2.6825  | 2.56E-07 | 2.17E-06 |
| RFLNB        | <a href="#">113269104</a> | -6.43076837 | -2.68499 | 2.41E-05 | 0.000139 |
| GPR160       | <a href="#">113255265</a> | -6.43214401 | -2.6853  | 8.54E-07 | 6.59E-06 |
| SIRPA        | <a href="#">113258419</a> | -6.43459476 | -2.68585 | 4.45E-07 | 3.62E-06 |
| NODAL        | <a href="#">113259143</a> | -6.44998452 | -2.6893  | 0.000711 | 0.002864 |
| CD209        | <a href="#">113242920</a> | -6.46336178 | -2.69228 | 0.002356 | 0.008102 |
| LOC113250070 | <a href="#">113250070</a> | -6.46491515 | -2.69263 | 3.07E-10 | 4.54E-09 |
| KCTD19       | <a href="#">113252361</a> | -6.46769252 | -2.69325 | 1.28E-05 | 7.88E-05 |
| IL24         | <a href="#">113242598</a> | -6.4701191  | -2.69379 | 0.000417 | 0.001782 |
| ACP5         | <a href="#">113243033</a> | -6.47558304 | -2.69501 | 0.000172 | 0.000818 |
| RFFL         | <a href="#">113268972</a> | -6.48214073 | -2.69647 | 1.23E-12 | 2.85E-11 |
| LOC113244203 | <a href="#">113244203</a> | -6.48895768 | -2.69799 | 1.7E-09  | 2.17E-08 |
| CMTM7        | <a href="#">113253837</a> | -6.49367082 | -2.69903 | 5.86E-08 | 5.64E-07 |
| LOC113243775 | <a href="#">113243775</a> | -6.49459945 | -2.69924 | 9.14E-09 | 1.01E-07 |
| PRR13        | <a href="#">113257552</a> | -6.49701369 | -2.69978 | 1.74E-08 | 1.83E-07 |
| BICDL1       | <a href="#">113267031</a> | -6.49855568 | -2.70012 | 1.51E-05 | 9.11E-05 |
| C2           | <a href="#">113243740</a> | -6.50572834 | -2.70171 | 1.63E-05 | 9.74E-05 |
| LOC113260124 | <a href="#">113260124</a> | -6.50728055 | -2.70205 | 1.66E-11 | 3.11E-10 |
| TLL12        | <a href="#">113241677</a> | -6.51181769 | -2.70306 | 4.04E-08 | 4E-07    |
| ADORA2A      | <a href="#">113247074</a> | -6.52248946 | -2.70542 | 7.78E-07 | 6.05E-06 |
| ISG15        | <a href="#">113270654</a> | -6.52853944 | -2.70676 | 2.77E-08 | 2.81E-07 |
| CEP152       | <a href="#">113269595</a> | -6.52865591 | -2.70679 | 6.25E-07 | 4.95E-06 |
| SLC9B2       | <a href="#">113263091</a> | -6.54120911 | -2.70956 | 0.000137 | 0.000663 |
| S100B        | <a href="#">113263954</a> | -6.54580071 | -2.71057 | 0.000287 | 0.001283 |
| LOC113267526 | <a href="#">113267526</a> | -6.56619941 | -2.71506 | 1.25E-06 | 9.32E-06 |
| HSD17B12     | <a href="#">113265017</a> | -6.56890901 | -2.71565 | 9.42E-09 | 1.04E-07 |

|              |                           |             |          |          |          |
|--------------|---------------------------|-------------|----------|----------|----------|
| LOC113243778 | <a href="#">113243778</a> | -6.57034208 | -2.71597 | 2.06E-10 | 3.14E-09 |
| SKAP2        | <a href="#">113261826</a> | -6.5764553  | -2.71731 | 5.15E-11 | 8.71E-10 |
| TIFA         | <a href="#">113255582</a> | -6.58974596 | -2.72022 | 2.19E-06 | 1.57E-05 |
| EVI2A        | <a href="#">113269010</a> | -6.6003173  | -2.72254 | 1.6E-07  | 1.43E-06 |
| FRAT1        | <a href="#">113251777</a> | -6.6006976  | -2.72262 | 3.87E-08 | 3.84E-07 |
| TEKT1        | <a href="#">113271340</a> | -6.60677279 | -2.72395 | 6.6E-05  | 0.000344 |
| FADS6        | <a href="#">113244678</a> | -6.61023218 | -2.7247  | 0.000268 | 0.001208 |
| DTL          | <a href="#">113262670</a> | -6.62831823 | -2.72864 | 3.71E-08 | 3.69E-07 |
| LOC113249622 | <a href="#">113249622</a> | -6.63100528 | -2.72923 | 0.001674 | 0.006033 |
| ALAD         | <a href="#">113266319</a> | -6.63418789 | -2.72992 | 7.54E-12 | 1.51E-10 |
| SGMS2        | <a href="#">113255540</a> | -6.63450706 | -2.72999 | 6.16E-05 | 0.000324 |
| PIM1         | <a href="#">113243874</a> | -6.64644494 | -2.73258 | 1.2E-08  | 1.31E-07 |
| MFSD9        | <a href="#">113247474</a> | -6.64858116 | -2.73305 | 3.83E-09 | 4.54E-08 |
| CNTRL        | <a href="#">113266355</a> | -6.64986302 | -2.73332 | 1.6E-07  | 1.42E-06 |
| LGALS9       | <a href="#">113269017</a> | -6.67299071 | -2.73833 | 2.53E-12 | 5.53E-11 |
| NEK3         | <a href="#">113251290</a> | -6.67345715 | -2.73843 | 1.65E-08 | 1.75E-07 |
| HMOX1        | <a href="#">113256008</a> | -6.68220336 | -2.74032 | 7.75E-08 | 7.34E-07 |
| LOC113264219 | <a href="#">113264219</a> | -6.69253338 | -2.74255 | 1.19E-05 | 7.38E-05 |
| DOCK11       | <a href="#">113241263</a> | -6.72716036 | -2.75    | 4.5E-10  | 6.45E-09 |
| CASC1        | <a href="#">113257791</a> | -6.72917885 | -2.75043 | 8.2E-07  | 6.35E-06 |
| CCSAP        | <a href="#">113259055</a> | -6.73092678 | -2.75081 | 1.23E-05 | 7.59E-05 |
| CHAF1B       | <a href="#">113260328</a> | -6.73392403 | -2.75145 | 4.37E-08 | 4.31E-07 |
| SQLE         | <a href="#">113252737</a> | -6.75344163 | -2.75562 | 1.67E-07 | 1.48E-06 |
| ERI1         | <a href="#">113262115</a> | -6.77349486 | -2.7599  | 1.37E-06 | 1.02E-05 |
| STK26        | <a href="#">113270961</a> | -6.77600309 | -2.76043 | 2.89E-08 | 2.92E-07 |
| CUNH1orf162  | <a href="#">113244429</a> | -6.78922534 | -2.76325 | 1.16E-05 | 7.23E-05 |
| DYRK3        | <a href="#">113242593</a> | -6.79018156 | -2.76345 | 5.98E-07 | 4.75E-06 |
| GNLY         | <a href="#">113243045</a> | -6.79138302 | -2.76371 | 0.000153 | 0.000734 |

|              |                           |             |          |          |          |
|--------------|---------------------------|-------------|----------|----------|----------|
| MIIP         | <a href="#">113270494</a> | -6.82872101 | -2.77162 | 1.34E-07 | 1.2E-06  |
| FCMR         | <a href="#">113242597</a> | -6.83138986 | -2.77218 | 4.53E-05 | 0.000244 |
| VCAM1        | <a href="#">113254345</a> | -6.83463686 | -2.77286 | 3.71E-05 | 0.000205 |
| TREM2        | <a href="#">113261318</a> | -6.83546009 | -2.77304 | 1.85E-07 | 1.62E-06 |
| TMEM35B      | <a href="#">113268316</a> | -6.84976188 | -2.77605 | 5.42E-10 | 7.67E-09 |
| POU2F2       | <a href="#">113243511</a> | -6.85030107 | -2.77617 | 1.04E-05 | 6.56E-05 |
| SYTL3        | <a href="#">113259605</a> | -6.85690221 | -2.77756 | 2.37E-07 | 2.03E-06 |
| SEMA4B       | <a href="#">113263706</a> | -6.86357218 | -2.77896 | 2.34E-09 | 2.92E-08 |
| PFKFB4       | <a href="#">113256839</a> | -6.86401464 | -2.77905 | 1.04E-07 | 9.54E-07 |
| LOC113243776 | <a href="#">113243776</a> | -6.86425577 | -2.7791  | 5.93E-10 | 8.29E-09 |
| NABP1        | <a href="#">113250648</a> | -6.87264668 | -2.78087 | 1.73E-08 | 1.82E-07 |
| HACD2        | <a href="#">113252377</a> | -6.88078775 | -2.78257 | 1.71E-06 | 1.25E-05 |
| HPCAL1       | <a href="#">113269824</a> | -6.88267217 | -2.78297 | 1.39E-12 | 3.2E-11  |
| RASGRP2      | <a href="#">113244161</a> | -6.88333532 | -2.78311 | 3.88E-09 | 4.59E-08 |
| HIPK1        | <a href="#">113244398</a> | -6.88396163 | -2.78324 | 1.16E-05 | 7.24E-05 |
| ACLY         | <a href="#">113265439</a> | -6.88421673 | -2.78329 | 2.7E-06  | 1.91E-05 |
| ACSM3        | <a href="#">113267499</a> | -6.90600471 | -2.78785 | 5.82E-06 | 3.86E-05 |
| RAB32        | <a href="#">113259529</a> | -6.92150449 | -2.79109 | 1.44E-12 | 3.3E-11  |
| TLR1         | <a href="#">113262411</a> | -6.92170932 | -2.79113 | 2.09E-08 | 2.16E-07 |
| CD79B        | <a href="#">113265279</a> | -6.93409009 | -2.79371 | 0.000333 | 0.001462 |
| FMNL1        | <a href="#">113265322</a> | -6.93885716 | -2.7947  | 7.48E-09 | 8.38E-08 |
| LTB          | <a href="#">113243712</a> | -6.93916362 | -2.79476 | 5.27E-05 | 0.000281 |
| ORAI2        | <a href="#">113267823</a> | -6.94641184 | -2.79627 | 4.6E-09  | 5.38E-08 |
| BORA         | <a href="#">113251415</a> | -6.95663448 | -2.79839 | 3.7E-10  | 5.41E-09 |
| LY9          | <a href="#">113246634</a> | -6.96070947 | -2.79923 | 4.84E-06 | 3.28E-05 |
| SIGLEC1      | <a href="#">113258394</a> | -6.96680636 | -2.8005  | 3.98E-09 | 4.69E-08 |
| CYTH4        | <a href="#">113241809</a> | -6.98416498 | -2.80409 | 7.98E-13 | 1.91E-11 |
| MBOAT1       | <a href="#">113264512</a> | -7.01964292 | -2.8114  | 1.42E-11 | 2.69E-10 |

|              |                           |             |          |          |          |
|--------------|---------------------------|-------------|----------|----------|----------|
| CARMIL2      | <a href="#">113252372</a> | -7.02219864 | -2.81192 | 0.000189 | 0.000886 |
| SLC17A9      | <a href="#">113258803</a> | -7.02987353 | -2.8135  | 2.9E-07  | 2.44E-06 |
| TRAIP        | <a href="#">113256889</a> | -7.03130594 | -2.81379 | 2.38E-08 | 2.44E-07 |
| TSSK3        | <a href="#">113268355</a> | -7.03234815 | -2.81401 | 7.28E-06 | 4.74E-05 |
| LOC113261044 | <a href="#">113261044</a> | -7.05803285 | -2.81927 | 2.38E-05 | 0.000137 |
| LOC113260550 | <a href="#">113260550</a> | -7.06671679 | -2.82104 | 4.59E-08 | 4.51E-07 |
| DMTN         | <a href="#">113270013</a> | -7.0714712  | -2.82201 | 4.13E-09 | 4.85E-08 |
| KIAA1211     | <a href="#">113262517</a> | -7.09093107 | -2.82598 | 2.48E-07 | 2.11E-06 |
| HK1          | <a href="#">113259128</a> | -7.09751977 | -2.82731 | 3.42E-08 | 3.43E-07 |
| LPGAT1       | <a href="#">113262668</a> | -7.10057727 | -2.82794 | 1.3E-10  | 2.04E-09 |
| CELSR3       | <a href="#">113256843</a> | -7.11390823 | -2.83064 | 3.95E-05 | 0.000216 |
| TAB3         | <a href="#">113265837</a> | -7.11409759 | -2.83068 | 2.42E-08 | 2.48E-07 |
| CLEC4G       | <a href="#">113242922</a> | -7.12806277 | -2.83351 | 0.00316  | 0.010462 |
| XPO7         | <a href="#">113270014</a> | -7.12898774 | -2.8337  | 3.93E-06 | 2.7E-05  |
| TNFAIP6      | <a href="#">113250888</a> | -7.13689995 | -2.8353  | 4.15E-07 | 3.4E-06  |
| GALNT14      | <a href="#">113240904</a> | -7.1985405  | -2.8477  | 6.88E-05 | 0.000358 |
| LOC113247175 | <a href="#">113247175</a> | -7.20757527 | -2.84951 | 2.36E-08 | 2.42E-07 |
| LOC113243734 | <a href="#">113243734</a> | -7.21021863 | -2.85004 | 9.47E-10 | 1.28E-08 |
| SKA1         | <a href="#">113253416</a> | -7.21098321 | -2.8502  | 2.67E-08 | 2.71E-07 |
| SLC25A21     | <a href="#">113266138</a> | -7.23179979 | -2.85435 | 3.24E-07 | 2.7E-06  |
| LRRC25       | <a href="#">113256717</a> | -7.24021687 | -2.85603 | 1.14E-08 | 1.25E-07 |
| RUNX3        | <a href="#">113268494</a> | -7.24361315 | -2.85671 | 3.75E-05 | 0.000206 |
| LOC113243774 | <a href="#">113243774</a> | -7.24708057 | -2.8574  | 5.57E-08 | 5.38E-07 |
| ASRGL1       | <a href="#">113246907</a> | -7.27461856 | -2.86287 | 1.95E-09 | 2.47E-08 |
| SYNPR        | <a href="#">113257036</a> | -7.28161522 | -2.86426 | 0.000783 | 0.003113 |
| PRDX5        | <a href="#">113244172</a> | -7.28579107 | -2.86509 | 2.52E-09 | 3.11E-08 |
| CDCA4        | <a href="#">113267185</a> | -7.2913091  | -2.86618 | 2.26E-09 | 2.83E-08 |
| LOC113269787 | <a href="#">113269787</a> | -7.29707502 | -2.86732 | 2.92E-07 | 2.45E-06 |

|              |                           |             |          |          |          |
|--------------|---------------------------|-------------|----------|----------|----------|
| GIMAP6       | <a href="#">113249233</a> | -7.31632006 | -2.87112 | 2.37E-08 | 2.43E-07 |
| SEPT6        | <a href="#">113241276</a> | -7.33415723 | -2.87463 | 5.97E-09 | 6.81E-08 |
| SQOR         | <a href="#">113269573</a> | -7.33886031 | -2.87556 | 4.39E-10 | 6.32E-09 |
| PIP4P2       | <a href="#">113252947</a> | -7.35381848 | -2.87849 | 2.65E-06 | 1.87E-05 |
| FLT3         | <a href="#">113251210</a> | -7.35996862 | -2.8797  | 3.08E-06 | 2.15E-05 |
| LSS          | <a href="#">113258959</a> | -7.3695228  | -2.88157 | 1.01E-09 | 1.36E-08 |
| AP1G2        | <a href="#">113246053</a> | -7.38951918 | -2.88548 | 2.47E-09 | 3.07E-08 |
| PREX1        | <a href="#">113258691</a> | -7.38961347 | -2.8855  | 1.02E-06 | 7.77E-06 |
| LOC113245585 | <a href="#">113245585</a> | -7.39337629 | -2.88623 | 3.67E-06 | 2.53E-05 |
| RAB6B        | <a href="#">113253951</a> | -7.39750632 | -2.88704 | 0.000152 | 0.000727 |
| ARNTL2       | <a href="#">113257775</a> | -7.41385766 | -2.89022 | 0.000235 | 0.001075 |
| IKBKE        | <a href="#">113242466</a> | -7.41867924 | -2.89116 | 1.46E-08 | 1.57E-07 |
| SLC25A39     | <a href="#">113265354</a> | -7.41883458 | -2.89119 | 3.84E-09 | 4.55E-08 |
| SLX4IP       | <a href="#">113258340</a> | -7.44499593 | -2.89627 | 4.15E-08 | 4.11E-07 |
| LAT          | <a href="#">113267622</a> | -7.44738081 | -2.89673 | 1.93E-06 | 1.39E-05 |
| IQGAP2       | <a href="#">113255190</a> | -7.44876976 | -2.897   | 2.35E-12 | 5.17E-11 |
| LOC113270849 | <a href="#">113270849</a> | -7.4733408  | -2.90175 | 2.81E-09 | 3.43E-08 |
| ACSL5        | <a href="#">113251936</a> | -7.48463779 | -2.90393 | 1.06E-11 | 2.08E-10 |
| AIF1         | <a href="#">113243717</a> | -7.48749229 | -2.90448 | 1.17E-13 | 3.22E-12 |
| BSN          | <a href="#">113256613</a> | -7.48757397 | -2.9045  | 4.88E-05 | 0.000262 |
| GFRA3        | <a href="#">113261787</a> | -7.48897741 | -2.90477 | 6.52E-08 | 6.25E-07 |
| GPNMB        | <a href="#">113261422</a> | -7.50484848 | -2.90782 | 5.96E-07 | 4.74E-06 |
| SLC22A31     | <a href="#">113252137</a> | -7.52013223 | -2.91076 | 0.000162 | 0.000772 |
| C1QA         | <a href="#">113268538</a> | -7.52062381 | -2.91085 | 1.94E-10 | 2.96E-09 |
| LOC113258955 | <a href="#">113258955</a> | -7.52760522 | -2.91219 | 9.23E-10 | 1.25E-08 |
| MAP4K1       | <a href="#">113243613</a> | -7.53279764 | -2.91319 | 2.86E-08 | 2.89E-07 |
| ACTR3        | <a href="#">113263434</a> | -7.54348177 | -2.91523 | 4.97E-08 | 4.85E-07 |
| KCNK5        | <a href="#">113243894</a> | -7.55699267 | -2.91781 | 8.86E-06 | 5.67E-05 |

|              |                           |             |          |          |          |
|--------------|---------------------------|-------------|----------|----------|----------|
| MIS18BP1     | <a href="#">113266179</a> | -7.58614443 | -2.92337 | 4.57E-08 | 4.49E-07 |
| KLHL6        | <a href="#">113254507</a> | -7.60918398 | -2.92774 | 3.76E-07 | 3.09E-06 |
| HYAL3        | <a href="#">113256904</a> | -7.62292105 | -2.93034 | 1.51E-07 | 1.35E-06 |
| CD22         | <a href="#">113244765</a> | -7.63151057 | -2.93197 | 2.41E-06 | 1.72E-05 |
| SLC7A1       | <a href="#">113251221</a> | -7.6381996  | -2.93323 | 9.7E-09  | 1.07E-07 |
| CD86         | <a href="#">113252170</a> | -7.67795193 | -2.94072 | 2.65E-12 | 5.74E-11 |
| CD244        | <a href="#">113246635</a> | -7.68369365 | -2.9418  | 1.38E-08 | 1.49E-07 |
| RAB3IL1      | <a href="#">113246962</a> | -7.69003035 | -2.94299 | 1.68E-11 | 3.15E-10 |
| DUT          | <a href="#">113269589</a> | -7.69050775 | -2.94308 | 3.78E-10 | 5.52E-09 |
| LOC113261589 | <a href="#">113261589</a> | -7.69793893 | -2.94447 | 2.74E-05 | 0.000156 |
| LCK          | <a href="#">113268359</a> | -7.71504333 | -2.94767 | 1.05E-06 | 7.98E-06 |
| CNN2         | <a href="#">113242715</a> | -7.72022035 | -2.94864 | 2.58E-07 | 2.19E-06 |
| EPHX3        | <a href="#">113248703</a> | -7.72690047 | -2.94989 | 8.37E-07 | 6.47E-06 |
| BNIP3L       | <a href="#">113269964</a> | -7.72796547 | -2.95009 | 7.05E-07 | 5.53E-06 |
| VAMP1        | <a href="#">113257980</a> | -7.73969114 | -2.95228 | 3.6E-09  | 4.28E-08 |
| ZWILCH       | <a href="#">113240888</a> | -7.73973213 | -2.95228 | 1.03E-08 | 1.14E-07 |
| PRIM1        | <a href="#">113256404</a> | -7.7650396  | -2.95699 | 7.57E-10 | 1.04E-08 |
| CYSLTR1      | <a href="#">113242149</a> | -7.77139786 | -2.95817 | 5.46E-09 | 6.27E-08 |
| LOC113266598 | <a href="#">113266598</a> | -7.78193383 | -2.96013 | 4.56E-07 | 3.7E-06  |
| SERPINA3     | <a href="#">113267307</a> | -7.7856646  | -2.96082 | 0.001558 | 0.005679 |
| BMX          | <a href="#">113240704</a> | -7.80705727 | -2.96478 | 3.26E-06 | 2.27E-05 |
| PARP14       | <a href="#">113252275</a> | -7.81682215 | -2.96658 | 8.85E-12 | 1.75E-10 |
| ICAM5        | <a href="#">113242980</a> | -7.82217388 | -2.96757 | 1.12E-05 | 7.01E-05 |
| CD247        | <a href="#">113262884</a> | -7.84251233 | -2.97132 | 3.59E-05 | 0.000198 |
| PAG1         | <a href="#">113253010</a> | -7.87568399 | -2.97741 | 8.89E-09 | 9.88E-08 |
| LOC113252151 | <a href="#">113252151</a> | -7.89102289 | -2.98021 | 1.84E-10 | 2.82E-09 |
| GEN1         | <a href="#">113270148</a> | -7.891612   | -2.98032 | 3.52E-09 | 4.2E-08  |
| GIMAP2       | <a href="#">113249228</a> | -7.90437986 | -2.98265 | 3.22E-07 | 2.68E-06 |

|              |                           |             |          |          |          |
|--------------|---------------------------|-------------|----------|----------|----------|
| MFSD2B       | <a href="#">113270408</a> | -7.91658968 | -2.98488 | 2.62E-07 | 2.22E-06 |
| ADH4         | <a href="#">113263120</a> | -7.93445175 | -2.98813 | 1.98E-05 | 0.000116 |
| STK10        | <a href="#">113264088</a> | -7.94023427 | -2.98918 | 2.29E-10 | 3.46E-09 |
| PRKCD        | <a href="#">113256975</a> | -7.96272401 | -2.99326 | 2.33E-10 | 3.51E-09 |
| AADA2L2      | <a href="#">113254071</a> | -8.00168619 | -3.0003  | 4.84E-07 | 3.91E-06 |
| TOMM34       | <a href="#">113258645</a> | -8.01587061 | -3.00286 | 1.13E-06 | 8.52E-06 |
| CIB1         | <a href="#">113263707</a> | -8.03293962 | -3.00593 | 3.41E-14 | 1.03E-12 |
| MAP7         | <a href="#">113259482</a> | -8.06735434 | -3.0121  | 4.02E-09 | 4.73E-08 |
| LOC113246321 | <a href="#">113246321</a> | -8.07827832 | -3.01405 | 0.000454 | 0.001919 |
| RAB27A       | <a href="#">113269646</a> | -8.0935582  | -3.01677 | 1.95E-08 | 2.03E-07 |
| EFHD2        | <a href="#">113270478</a> | -8.11506147 | -3.0206  | 1.7E-09  | 2.17E-08 |
| ANP32B       | <a href="#">113260418</a> | -8.12891142 | -3.02306 | 1.03E-07 | 9.5E-07  |
| IGSF22       | <a href="#">113265118</a> | -8.13463844 | -3.02408 | 6.92E-08 | 6.6E-07  |
| EIF2AK1      | <a href="#">113267934</a> | -8.13793432 | -3.02466 | 9.12E-09 | 1.01E-07 |
| AMPD3        | <a href="#">113245788</a> | -8.14498666 | -3.02591 | 9.59E-06 | 6.07E-05 |
| EPHB6        | <a href="#">113265418</a> | -8.16756166 | -3.02991 | 1.85E-06 | 1.35E-05 |
| C5AR2        | <a href="#">113243375</a> | -8.18464263 | -3.03292 | 1.03E-05 | 6.51E-05 |
| PANK2        | <a href="#">113258385</a> | -8.19792435 | -3.03526 | 4.38E-13 | 1.1E-11  |
| CENPO        | <a href="#">113270597</a> | -8.21262379 | -3.03784 | 5.74E-07 | 4.57E-06 |
| SH3BP1       | <a href="#">113241803</a> | -8.22759412 | -3.04047 | 1.7E-10  | 2.62E-09 |
| CUNH18orf54  | <a href="#">113253433</a> | -8.23002671 | -3.0409  | 1.2E-09  | 1.57E-08 |
| PSRC1        | <a href="#">113244931</a> | -8.24612406 | -3.04372 | 3.71E-09 | 4.4E-08  |
| CXCL10       | <a href="#">113263254</a> | -8.25393867 | -3.04508 | 0.000247 | 0.001125 |
| AURKA        | <a href="#">113258749</a> | -8.25893172 | -3.04596 | 6.73E-09 | 7.59E-08 |
| LRG1         | <a href="#">113242844</a> | -8.27056647 | -3.04799 | 3.29E-13 | 8.41E-12 |
| LOC113264440 | <a href="#">113264440</a> | -8.27288726 | -3.04839 | 1.4E-08  | 1.5E-07  |
| DNMT1        | <a href="#">113242975</a> | -8.27566293 | -3.04887 | 5.58E-09 | 6.41E-08 |
| LOC113250369 | <a href="#">113250369</a> | -8.28751104 | -3.05094 | 9.91E-06 | 6.27E-05 |

|              |                           |             |          |          |          |
|--------------|---------------------------|-------------|----------|----------|----------|
| HASPIN       | <a href="#">113269162</a> | -8.28971106 | -3.05132 | 4.61E-10 | 6.6E-09  |
| LOC113268656 | <a href="#">113268656</a> | -8.2897584  | -3.05133 | 2.21E-13 | 5.84E-12 |
| NIPSNAP1     | <a href="#">113245017</a> | -8.30219884 | -3.05349 | 7.02E-06 | 4.59E-05 |
| RAD54B       | <a href="#">113252926</a> | -8.32398837 | -3.05727 | 7.41E-08 | 7.03E-07 |
| PLXNC1       | <a href="#">113256150</a> | -8.3246675  | -3.05739 | 1.18E-09 | 1.56E-08 |
| ALPK1        | <a href="#">113255579</a> | -8.3293408  | -3.0582  | 2.34E-11 | 4.27E-10 |
| LOC113261839 | <a href="#">113261839</a> | -8.37945906 | -3.06686 | 1.48E-06 | 1.09E-05 |
| LY96         | <a href="#">113253042</a> | -8.38576547 | -3.06794 | 8.03E-08 | 7.56E-07 |
| PMAIP1       | <a href="#">113253468</a> | -8.38944568 | -3.06858 | 2.62E-06 | 1.86E-05 |
| LOC113245198 | <a href="#">113245198</a> | -8.39221429 | -3.06905 | 8.96E-06 | 5.72E-05 |
| NSL1         | <a href="#">113262679</a> | -8.4058844  | -3.0714  | 6.49E-12 | 1.32E-10 |
| CDC25A       | <a href="#">113256823</a> | -8.4198472  | -3.07379 | 7.37E-08 | 7E-07    |
| PCTP         | <a href="#">113265657</a> | -8.43365097 | -3.07616 | 1.37E-13 | 3.74E-12 |
| LOC113263203 | <a href="#">113263203</a> | -8.43998075 | -3.07724 | 1.12E-05 | 7.02E-05 |
| CCDC134      | <a href="#">113241717</a> | -8.44157676 | -3.07751 | 5.77E-08 | 5.56E-07 |
| ADGRE2       | <a href="#">113247146</a> | -8.45174231 | -3.07925 | 2.14E-08 | 2.21E-07 |
| STK4         | <a href="#">113258646</a> | -8.50946776 | -3.08907 | 1.03E-10 | 1.66E-09 |
| TRIP13       | <a href="#">113260782</a> | -8.51991403 | -3.09084 | 1.35E-11 | 2.57E-10 |
| ZNF467       | <a href="#">113241465</a> | -8.5400015  | -3.09424 | 9.66E-07 | 7.4E-06  |
| CD84         | <a href="#">113246758</a> | -8.57866254 | -3.10075 | 7.53E-06 | 4.89E-05 |
| LOC113248423 | <a href="#">113248423</a> | -8.58019361 | -3.10101 | 1.17E-07 | 1.06E-06 |
| TRAK2        | <a href="#">113250589</a> | -8.59887885 | -3.10415 | 2.08E-07 | 1.8E-06  |
| LOC113268942 | <a href="#">113268942</a> | -8.59963283 | -3.10428 | 2.51E-12 | 5.49E-11 |
| RASSF2       | <a href="#">113258371</a> | -8.61451717 | -3.10677 | 9.86E-11 | 1.59E-09 |
| LOC113259972 | <a href="#">113259972</a> | -8.61827019 | -3.1074  | 1.54E-10 | 2.4E-09  |
| LOC113248519 | <a href="#">113248519</a> | -8.63217147 | -3.10972 | 2.89E-07 | 2.43E-06 |
| LPCAT1       | <a href="#">113260704</a> | -8.64123004 | -3.11124 | 4.92E-09 | 5.73E-08 |
| SPATC1       | <a href="#">113247628</a> | -8.67261874 | -3.11647 | 2.39E-06 | 1.7E-05  |

|              |                           |             |          |          |          |
|--------------|---------------------------|-------------|----------|----------|----------|
| MIS18A       | <a href="#">113266182</a> | -8.6845702  | -3.11845 | 1.87E-08 | 1.95E-07 |
| LOC113242151 | <a href="#">113242151</a> | -8.69351136 | -3.11994 | 1.05E-06 | 7.96E-06 |
| GMIP         | <a href="#">113256762</a> | -8.71704338 | -3.12384 | 1.82E-09 | 2.31E-08 |
| PCK1         | <a href="#">113258758</a> | -8.72385701 | -3.12497 | 0.00024  | 0.001095 |
| IL1R2        | <a href="#">113247309</a> | -8.73910957 | -3.12749 | 1.37E-11 | 2.61E-10 |
| TONSL        | <a href="#">113247697</a> | -8.74897111 | -3.12911 | 2.98E-14 | 9.07E-13 |
| TTF2         | <a href="#">113244375</a> | -8.75374677 | -3.1299  | 3.26E-11 | 5.74E-10 |
| KCNN4        | <a href="#">113243484</a> | -8.75723301 | -3.13048 | 6.63E-08 | 6.34E-07 |
| ACRBP        | <a href="#">113257970</a> | -8.76073775 | -3.13105 | 1.97E-06 | 1.42E-05 |
| LOC113247089 | <a href="#">113247089</a> | -8.78811104 | -3.13555 | 1.28E-08 | 1.38E-07 |
| SLC46A2      | <a href="#">113266298</a> | -8.80209601 | -3.13785 | 3.26E-09 | 3.92E-08 |
| LOC113270817 | <a href="#">113270817</a> | -8.82538222 | -3.14166 | 1.5E-07  | 1.34E-06 |
| DNAH9        | <a href="#">113271222</a> | -8.84482383 | -3.14483 | 2.13E-07 | 1.84E-06 |
| CD2          | <a href="#">113244378</a> | -8.86667966 | -3.14839 | 1.71E-07 | 1.51E-06 |
| NSD2         | <a href="#">113245739</a> | -8.897537   | -3.15341 | 2.05E-08 | 2.13E-07 |
| SLC6A12      | <a href="#">113258029</a> | -8.90413156 | -3.15447 | 0.000241 | 0.001101 |
| CLEC2D       | <a href="#">113257912</a> | -8.93267059 | -3.15909 | 3.12E-11 | 5.52E-10 |
| CD180        | <a href="#">113255271</a> | -8.93637939 | -3.15969 | 1.13E-07 | 1.02E-06 |
| CD3G         | <a href="#">113260001</a> | -8.94662528 | -3.16134 | 1.1E-06  | 8.34E-06 |
| C5AR1        | <a href="#">113243378</a> | -8.94667849 | -3.16135 | 3.61E-12 | 7.63E-11 |
| OSCAR        | <a href="#">113247418</a> | -8.96349268 | -3.16406 | 7.57E-06 | 4.92E-05 |
| CLECL1       | <a href="#">113257911</a> | -8.96750248 | -3.16471 | 5.66E-15 | 1.94E-13 |
| KCTD17       | <a href="#">113255976</a> | -8.97660269 | -3.16617 | 1.23E-08 | 1.33E-07 |
| DUSP5        | <a href="#">113251922</a> | -8.98383    | -3.16733 | 3.47E-07 | 2.87E-06 |
| GNG2         | <a href="#">113242381</a> | -9.0026687  | -3.17035 | 2.6E-09  | 3.19E-08 |
| STX11        | <a href="#">113259518</a> | -9.01363084 | -3.17211 | 4.09E-12 | 8.55E-11 |
| EHD3         | <a href="#">113240931</a> | -9.02358073 | -3.1737  | 6.19E-10 | 8.62E-09 |
| MICAL1       | <a href="#">113264746</a> | -9.04185987 | -3.17662 | 2.93E-10 | 4.36E-09 |

|              |                           |             |          |          |          |
|--------------|---------------------------|-------------|----------|----------|----------|
| ALG8         | <a href="#">113269365</a> | -9.05139045 | -3.17814 | 1.22E-11 | 2.36E-10 |
| REEP4        | <a href="#">113270009</a> | -9.07820656 | -3.18241 | 8.46E-11 | 1.38E-09 |
| CLIC2        | <a href="#">113248334</a> | -9.08077464 | -3.18282 | 1.07E-10 | 1.71E-09 |
| CCDC180      | <a href="#">113260648</a> | -9.08140511 | -3.18292 | 4.86E-05 | 0.000261 |
| JAML         | <a href="#">113260006</a> | -9.08783682 | -3.18394 | 4.09E-10 | 5.91E-09 |
| CD300A       | <a href="#">113265201</a> | -9.10337434 | -3.1864  | 1.15E-09 | 1.52E-08 |
| PLBD1        | <a href="#">113257859</a> | -9.11240109 | -3.18783 | 2.18E-07 | 1.87E-06 |
| LOC113246754 | <a href="#">113246754</a> | -9.12726429 | -3.19018 | 7.5E-07  | 5.86E-06 |
| FCHO1        | <a href="#">113256689</a> | -9.16065222 | -3.19545 | 2.83E-07 | 2.39E-06 |
| HMGB3        | <a href="#">113246801</a> | -9.20829067 | -3.20293 | 3.81E-14 | 1.14E-12 |
| PLA2G7       | <a href="#">113261232</a> | -9.22401771 | -3.2054  | 4.91E-12 | 1.01E-10 |
| SLC25A1      | <a href="#">113245967</a> | -9.2255345  | -3.20563 | 1.42E-05 | 8.63E-05 |
| WDFY4        | <a href="#">113243107</a> | -9.23069269 | -3.20644 | 3.26E-10 | 4.82E-09 |
| LOC113267642 | <a href="#">113267642</a> | -9.24360009 | -3.20845 | 0.000192 | 0.000896 |
| BARD1        | <a href="#">113250496</a> | -9.24673363 | -3.20894 | 7.14E-10 | 9.86E-09 |
| MYO1G        | <a href="#">113257755</a> | -9.2513283  | -3.20966 | 1.19E-10 | 1.88E-09 |
| ST6GALNAC2   | <a href="#">113244590</a> | -9.26150516 | -3.21125 | 1.46E-09 | 1.9E-08  |
| ADA2         | <a href="#">113258056</a> | -9.27110887 | -3.21274 | 2.98E-14 | 9.07E-13 |
| LOC113256785 | <a href="#">113256785</a> | -9.28410901 | -3.21476 | 3.41E-12 | 7.26E-11 |
| CD163        | <a href="#">113257937</a> | -9.28598913 | -3.21506 | 6.36E-14 | 1.83E-12 |
| HCAR2        | <a href="#">113266917</a> | -9.28628504 | -3.2151  | 3.43E-06 | 2.38E-05 |
| DRAM1        | <a href="#">113256083</a> | -9.29115973 | -3.21586 | 5.36E-12 | 1.1E-10  |
| KCNAB2       | <a href="#">113270580</a> | -9.29789383 | -3.2169  | 2.48E-09 | 3.07E-08 |
| LOC113247069 | <a href="#">113247069</a> | -9.30039786 | -3.21729 | 3.51E-09 | 4.19E-08 |
| PIF1         | <a href="#">113240856</a> | -9.31575752 | -3.21967 | 3.35E-08 | 3.36E-07 |
| TMEM26       | <a href="#">113259080</a> | -9.33038122 | -3.22194 | 1.47E-08 | 1.57E-07 |
| GLT1D1       | <a href="#">113266868</a> | -9.35941286 | -3.22642 | 1.11E-06 | 8.41E-06 |
| SRI          | <a href="#">113259569</a> | -9.37620638 | -3.229   | 5.33E-08 | 5.18E-07 |

|              |                           |             |          |          |          |
|--------------|---------------------------|-------------|----------|----------|----------|
| CARHSP1      | <a href="#">113270818</a> | -9.47076786 | -3.24348 | 4.8E-14  | 1.41E-12 |
| GALNT6       | <a href="#">113257605</a> | -9.49673151 | -3.24743 | 8.01E-10 | 1.09E-08 |
| RGS10        | <a href="#">113251994</a> | -9.50314131 | -3.2484  | 5.05E-09 | 5.85E-08 |
| PIM2         | <a href="#">113265933</a> | -9.57526672 | -3.25931 | 3.36E-07 | 2.79E-06 |
| IL18         | <a href="#">113260053</a> | -9.58369195 | -3.26058 | 8.51E-10 | 1.15E-08 |
| PLCG2        | <a href="#">113252535</a> | -9.58557326 | -3.26086 | 1.08E-09 | 1.44E-08 |
| SPECC1       | <a href="#">113271263</a> | -9.5942104  | -3.26216 | 2.76E-10 | 4.13E-09 |
| AUNIP        | <a href="#">113268479</a> | -9.60027183 | -3.26308 | 1.36E-09 | 1.77E-08 |
| LAT2         | <a href="#">113267780</a> | -9.65085085 | -3.27066 | 7.28E-11 | 1.21E-09 |
| AOAH         | <a href="#">113262793</a> | -9.65220343 | -3.27086 | 1.98E-12 | 4.39E-11 |
| MSR1         | <a href="#">113262166</a> | -9.65378857 | -3.2711  | 2.98E-05 | 0.000168 |
| LOC113247388 | <a href="#">113247388</a> | -9.65508074 | -3.27129 | 5.2E-09  | 5.99E-08 |
| PC           | <a href="#">113244047</a> | -9.67579116 | -3.27438 | 0.000316 | 0.0014   |
| DNPH1        | <a href="#">113261273</a> | -9.68118028 | -3.27518 | 8.22E-08 | 7.71E-07 |
| LOC113268965 | <a href="#">113268965</a> | -9.6840391  | -3.27561 | 1.34E-13 | 3.67E-12 |
| B4GALT5      | <a href="#">113258702</a> | -9.69100562 | -3.27665 | 6.31E-11 | 1.06E-09 |
| SH3BGRL2     | <a href="#">113261084</a> | -9.69187191 | -3.27678 | 4.47E-10 | 6.43E-09 |
| COTL1        | <a href="#">113252192</a> | -9.70012664 | -3.278   | 6.31E-10 | 8.77E-09 |
| ARRB2        | <a href="#">113271089</a> | -9.70420096 | -3.27861 | 5.82E-11 | 9.81E-10 |
| CIDEC        | <a href="#">113257151</a> | -9.70481884 | -3.2787  | 6.26E-05 | 0.000329 |
| LPAR5        | <a href="#">113257973</a> | -9.70879874 | -3.27929 | 4.25E-09 | 4.99E-08 |
| AK7          | <a href="#">113267291</a> | -9.73113949 | -3.28261 | 6.51E-05 | 0.00034  |
| CD200R1      | <a href="#">113251345</a> | -9.73467326 | -3.28313 | 3.81E-14 | 1.14E-12 |
| BRCA1        | <a href="#">113265384</a> | -9.76449235 | -3.28755 | 1.92E-12 | 4.3E-11  |
| TET3         | <a href="#">113243822</a> | -9.79805367 | -3.2925  | 2.94E-10 | 4.36E-09 |
| IL7R         | <a href="#">113260884</a> | -9.82180376 | -3.29599 | 3.58E-06 | 2.48E-05 |
| RDH16        | <a href="#">113256401</a> | -9.8369038  | -3.2982  | 4.19E-11 | 7.21E-10 |
| HCLS1        | <a href="#">113252106</a> | -9.84415654 | -3.29927 | 1.08E-11 | 2.11E-10 |

|              |                           |             |          |          |          |
|--------------|---------------------------|-------------|----------|----------|----------|
| TNFAIP8L2    | <a href="#">113246164</a> | -9.84508399 | -3.2994  | 3.27E-11 | 5.75E-10 |
| RAP1GAP2     | <a href="#">113269150</a> | -9.84996599 | -3.30012 | 4.98E-09 | 5.77E-08 |
| PSD4         | <a href="#">113242515</a> | -9.85193037 | -3.30041 | 1.57E-10 | 2.44E-09 |
| NLRC5        | <a href="#">113252270</a> | -9.86691253 | -3.3026  | 3.34E-13 | 8.53E-12 |
| NEMP1        | <a href="#">113255866</a> | -9.88617496 | -3.30541 | 1.9E-11  | 3.53E-10 |
| ENPEP        | <a href="#">113255569</a> | -9.90414175 | -3.30803 | 2.43E-08 | 2.48E-07 |
| LOC113246660 | <a href="#">113246660</a> | -9.94109592 | -3.3134  | 9.79E-14 | 2.75E-12 |
| LOC113266557 | <a href="#">113266557</a> | -9.9488246  | -3.31453 | 2.78E-07 | 2.34E-06 |
| CD48         | <a href="#">113246744</a> | -9.96738423 | -3.31721 | 5.61E-13 | 1.38E-11 |
| FGD2         | <a href="#">113243873</a> | -9.97172262 | -3.31784 | 1.29E-13 | 3.54E-12 |
| FN3KRP       | <a href="#">113244463</a> | -10.0233858 | -3.3253  | 3.64E-12 | 7.68E-11 |
| DNA2         | <a href="#">113259112</a> | -10.0401568 | -3.32771 | 1.24E-12 | 2.86E-11 |
| PTGR1        | <a href="#">113260318</a> | -10.0574771 | -3.3302  | 0        | 0        |
| CHAF1A       | <a href="#">113242832</a> | -10.0647513 | -3.33124 | 4.44E-16 | 1.8E-14  |
| TICRR        | <a href="#">113263689</a> | -10.1098519 | -3.33769 | 4.27E-13 | 1.08E-11 |
| TRIM22       | <a href="#">113248232</a> | -10.1169548 | -3.3387  | 2.42E-14 | 7.48E-13 |
| LOC113243544 | <a href="#">113243544</a> | -10.121182  | -3.33931 | 2.87E-08 | 2.91E-07 |
| AMMECR1      | <a href="#">113241238</a> | -10.1275928 | -3.34022 | 9.24E-08 | 8.56E-07 |
| DOCK10       | <a href="#">113250392</a> | -10.158772  | -3.34465 | 3.02E-12 | 6.5E-11  |
| CD226        | <a href="#">113253513</a> | -10.1738553 | -3.34679 | 3.71E-08 | 3.69E-07 |
| C3           | <a href="#">113242886</a> | -10.1927841 | -3.34948 | 3.77E-11 | 6.55E-10 |
| LOC113270721 | <a href="#">113270721</a> | -10.1995438 | -3.35043 | 1.03E-10 | 1.66E-09 |
| RIPK3        | <a href="#">113246058</a> | -10.2056142 | -3.35129 | 7.81E-10 | 1.07E-08 |
| STMN1        | <a href="#">113268477</a> | -10.2186788 | -3.35314 | 2.42E-09 | 3.01E-08 |
| CHTF18       | <a href="#">113245386</a> | -10.2493314 | -3.35746 | 4.79E-11 | 8.14E-10 |
| SLAIN1       | <a href="#">113251439</a> | -10.2523788 | -3.35789 | 6.84E-11 | 1.14E-09 |
| CLDN4        | <a href="#">113267786</a> | -10.2576806 | -3.35863 | 1.69E-07 | 1.49E-06 |
| SERPINB1     | <a href="#">113264389</a> | -10.2599368 | -3.35895 | 6.45E-09 | 7.32E-08 |

|              |                           |             |          |          |          |
|--------------|---------------------------|-------------|----------|----------|----------|
| GALNT3       | <a href="#">113250823</a> | -10.2706029 | -3.36045 | 2.97E-06 | 2.08E-05 |
| FAM83D       | <a href="#">113258601</a> | -10.2762291 | -3.36124 | 5.21E-10 | 7.39E-09 |
| LOC113246717 | <a href="#">113246717</a> | -10.2857796 | -3.36258 | 8.85E-08 | 8.24E-07 |
| IRF5         | <a href="#">113263966</a> | -10.3303105 | -3.36881 | 4.59E-13 | 1.15E-11 |
| LOC113270720 | <a href="#">113270720</a> | -10.3348943 | -3.36945 | 2.04E-08 | 2.12E-07 |
| ACAP1        | <a href="#">113271119</a> | -10.340332  | -3.37021 | 3.04E-08 | 3.07E-07 |
| MCM5         | <a href="#">113256007</a> | -10.3615825 | -3.37317 | 3.05E-14 | 9.28E-13 |
| GIMAP8       | <a href="#">113241470</a> | -10.4237737 | -3.38181 | 1.35E-10 | 2.11E-09 |
| HACD4        | <a href="#">113260582</a> | -10.4507455 | -3.38553 | 2.3E-10  | 3.48E-09 |
| CYFIP2       | <a href="#">113264018</a> | -10.4591878 | -3.3867  | 6.16E-06 | 4.08E-05 |
| RIPOR2       | <a href="#">113264323</a> | -10.4632324 | -3.38726 | 1.52E-08 | 1.62E-07 |
| WEE1         | <a href="#">113245775</a> | -10.5305467 | -3.39651 | 6.77E-10 | 9.36E-09 |
| CENPI        | <a href="#">113244300</a> | -10.5524015 | -3.3995  | 6.57E-11 | 1.1E-09  |
| QPCT         | <a href="#">113241400</a> | -10.5560842 | -3.4     | 1.92E-10 | 2.95E-09 |
| DOCK5        | <a href="#">113269972</a> | -10.5953614 | -3.40536 | 1.07E-12 | 2.5E-11  |
| FAM83A       | <a href="#">113252757</a> | -10.5991175 | -3.40587 | 7.54E-05 | 0.000389 |
| SPSB2        | <a href="#">113257955</a> | -10.627822  | -3.40977 | 6.91E-12 | 1.39E-10 |
| SGK2         | <a href="#">113258622</a> | -10.6448545 | -3.41208 | 7.46E-08 | 7.08E-07 |
| CCL16        | <a href="#">113268945</a> | -10.6899768 | -3.41819 | 4.78E-08 | 4.68E-07 |
| FAM107B      | <a href="#">113241394</a> | -10.7252456 | -3.42294 | 1.05E-08 | 1.15E-07 |
| FCER1G       | <a href="#">113246719</a> | -10.7508033 | -3.42637 | 4.37E-14 | 1.29E-12 |
| GIN54        | <a href="#">113245542</a> | -10.7724481 | -3.42927 | 8.15E-08 | 7.66E-07 |
| C1QB         | <a href="#">113268536</a> | -10.7827042 | -3.43065 | 7.97E-14 | 2.26E-12 |
| ATP2A3       | <a href="#">113269168</a> | -10.8013949 | -3.43315 | 8.66E-08 | 8.08E-07 |
| SUSD1        | <a href="#">113260312</a> | -10.8268851 | -3.43655 | 3.55E-09 | 4.23E-08 |
| ARAP2        | <a href="#">113262394</a> | -10.8544541 | -3.44022 | 3.76E-11 | 6.54E-10 |
| STIL         | <a href="#">113254706</a> | -10.8580406 | -3.44069 | 4.51E-12 | 9.41E-11 |
| LGALS12      | <a href="#">113246993</a> | -10.8595073 | -3.44089 | 2.8E-09  | 3.42E-08 |

|             |                           |             |          |          |          |
|-------------|---------------------------|-------------|----------|----------|----------|
| PIK3CG      | <a href="#">113258627</a> | -10.8687087 | -3.44211 | 4.74E-12 | 9.84E-11 |
| RDM1        | <a href="#">113265317</a> | -10.8875785 | -3.44461 | 4.26E-11 | 7.32E-10 |
| CDCA7L      | <a href="#">113261227</a> | -10.8956973 | -3.44569 | 1.19E-11 | 2.31E-10 |
| WDR76       | <a href="#">113241950</a> | -10.9048531 | -3.4469  | 2.4E-11  | 4.34E-10 |
| ISG20       | <a href="#">113263677</a> | -10.9159857 | -3.44837 | 2.09E-09 | 2.63E-08 |
| UCP2        | <a href="#">113269303</a> | -10.9607216 | -3.45427 | 2.13E-11 | 3.91E-10 |
| MMP19       | <a href="#">113256453</a> | -10.9625185 | -3.45451 | 3.33E-16 | 1.39E-14 |
| C1QC        | <a href="#">113268537</a> | -10.9675181 | -3.45517 | 5.28E-14 | 1.54E-12 |
| RASGRP4     | <a href="#">113243614</a> | -10.9732171 | -3.45591 | 4.54E-11 | 7.75E-10 |
| PTPRJ       | <a href="#">113264945</a> | -11.030717  | -3.46345 | 1.55E-10 | 2.41E-09 |
| SH2D1B      | <a href="#">113268669</a> | -11.0480526 | -3.46572 | 1.67E-09 | 2.14E-08 |
| RASSF5      | <a href="#">113242463</a> | -11.060672  | -3.46737 | 7.33E-11 | 1.21E-09 |
| PGD         | <a href="#">113270522</a> | -11.0658001 | -3.46804 | 5.33E-12 | 1.09E-10 |
| PAPSS2      | <a href="#">113258979</a> | -11.0830803 | -3.47029 | 2E-11    | 3.69E-10 |
| TMEM154     | <a href="#">113255761</a> | -11.0861324 | -3.47068 | 0        | 0        |
| PHKA2       | <a href="#">113242251</a> | -11.1004343 | -3.47254 | 1.84E-11 | 3.43E-10 |
| RAD18       | <a href="#">113257127</a> | -11.1047762 | -3.47311 | 7.93E-11 | 1.3E-09  |
| NBEAL2      | <a href="#">113256803</a> | -11.114427  | -3.47436 | 1.22E-08 | 1.32E-07 |
| CDC25B      | <a href="#">113258383</a> | -11.2075421 | -3.4864  | 1.64E-09 | 2.1E-08  |
| CD7         | <a href="#">113244475</a> | -11.2419718 | -3.49082 | 2.91E-07 | 2.45E-06 |
| CSF2RB      | <a href="#">113255980</a> | -11.2873996 | -3.49664 | 4.99E-11 | 8.45E-10 |
| SELP        | <a href="#">113262857</a> | -11.2966051 | -3.49782 | 1.66E-07 | 1.47E-06 |
| CUNH15orf48 | <a href="#">113269571</a> | -11.3420549 | -3.50361 | 5.32E-06 | 3.56E-05 |
| RHOH        | <a href="#">113262430</a> | -11.4143044 | -3.51277 | 9.81E-07 | 7.5E-06  |
| TNFSF13B    | <a href="#">113251533</a> | -11.4974273 | -3.52324 | 3.11E-13 | 7.96E-12 |
| DBF4        | <a href="#">113259531</a> | -11.522577  | -3.52639 | 7.63E-12 | 1.52E-10 |
| MTHFD1L     | <a href="#">113259560</a> | -11.5444509 | -3.52913 | 9.99E-16 | 3.81E-14 |
| AKNA        | <a href="#">113266330</a> | -11.5445685 | -3.52914 | 7.82E-10 | 1.07E-08 |

|              |                           |             |          |          |          |
|--------------|---------------------------|-------------|----------|----------|----------|
| SPNS3        | <a href="#">113271044</a> | -11.5628652 | -3.53143 | 5.7E-14  | 1.66E-12 |
| KPNA2        | <a href="#">113265264</a> | -11.6597008 | -3.54346 | 0        | 0        |
| BTK          | <a href="#">113244303</a> | -11.6710201 | -3.54486 | 1.24E-12 | 2.87E-11 |
| PKMYT1       | <a href="#">113245420</a> | -11.7149066 | -3.55027 | 1.62E-09 | 2.08E-08 |
| NLRP3        | <a href="#">113247462</a> | -11.7698632 | -3.55703 | 6.56E-11 | 1.1E-09  |
| CLCN2        | <a href="#">113254245</a> | -11.8355825 | -3.56506 | 9.97E-11 | 1.61E-09 |
| ELOVL5       | <a href="#">113261178</a> | -11.8368761 | -3.56522 | 2.17E-06 | 1.56E-05 |
| CCR2         | <a href="#">113256789</a> | -11.8480121 | -3.56657 | 8.38E-13 | 2E-11    |
| LBR          | <a href="#">113262908</a> | -11.8631783 | -3.56842 | 1.12E-07 | 1.02E-06 |
| MPEG1        | <a href="#">113246548</a> | -11.8928376 | -3.57202 | 1.3E-11  | 2.49E-10 |
| FAM117A      | <a href="#">113265606</a> | -11.9520727 | -3.57919 | 1.21E-11 | 2.34E-10 |
| LOC113265672 | <a href="#">113265672</a> | -12.0289316 | -3.58844 | 1.09E-07 | 9.94E-07 |
| GIMAP4       | <a href="#">113249230</a> | -12.0406267 | -3.58984 | 1.11E-16 | 4.96E-15 |
| GPR132       | <a href="#">113267184</a> | -12.0677681 | -3.59309 | 3.4E-08  | 3.41E-07 |
| HSD17B7      | <a href="#">113268675</a> | -12.1562363 | -3.60362 | 3.53E-11 | 6.16E-10 |
| DENND1C      | <a href="#">113242880</a> | -12.1584087 | -3.60388 | 7.55E-13 | 1.83E-11 |
| ANO3         | <a href="#">113265098</a> | -12.2152636 | -3.61061 | 2.69E-08 | 2.73E-07 |
| SMC4         | <a href="#">113254137</a> | -12.2415877 | -3.61372 | 3.88E-11 | 6.72E-10 |
| GRK6         | <a href="#">113264153</a> | -12.2903065 | -3.61945 | 1.21E-10 | 1.92E-09 |
| SMOX         | <a href="#">113258376</a> | -12.2928046 | -3.61974 | 4.75E-12 | 9.85E-11 |
| CCDC125      | <a href="#">113255255</a> | -12.3157484 | -3.62243 | 4.45E-11 | 7.61E-10 |
| INPP5D       | <a href="#">113250332</a> | -12.3922554 | -3.63137 | 1.72E-11 | 3.21E-10 |
| TMEM71       | <a href="#">113252707</a> | -12.405871  | -3.63295 | 3.17E-09 | 3.83E-08 |
| BLVRB        | <a href="#">113243564</a> | -12.4387316 | -3.63677 | 3.29E-10 | 4.86E-09 |
| PSTPIP1      | <a href="#">113241007</a> | -12.4522929 | -3.63834 | 2E-12    | 4.44E-11 |
| GNA15        | <a href="#">113242779</a> | -12.4529256 | -3.63841 | 8.66E-15 | 2.86E-13 |
| ARHGAP11A    | <a href="#">113242073</a> | -12.4874683 | -3.64241 | 3.1E-13  | 7.96E-12 |
| GIMAP5       | <a href="#">113249226</a> | -12.5603706 | -3.65081 | 3.91E-12 | 8.19E-11 |

|              |                           |             |          |          |          |
|--------------|---------------------------|-------------|----------|----------|----------|
| TSTD3        | <a href="#">113264801</a> | -12.5679325 | -3.65168 | 2.63E-09 | 3.22E-08 |
| SIGLEC11     | <a href="#">113243272</a> | -12.5933319 | -3.65459 | 2.2E-10  | 3.33E-09 |
| FGD3         | <a href="#">113270098</a> | -12.6341201 | -3.65925 | 3.06E-09 | 3.7E-08  |
| KIF21B       | <a href="#">113242564</a> | -12.6364813 | -3.65952 | 2.42E-08 | 2.48E-07 |
| GAS2L3       | <a href="#">113256099</a> | -12.6857803 | -3.66514 | 1.95E-13 | 5.22E-12 |
| CUNH16orf54  | <a href="#">113267671</a> | -12.7363496 | -3.67088 | 9.42E-11 | 1.52E-09 |
| LAPTM5       | <a href="#">113268393</a> | -12.7598437 | -3.67354 | 4.46E-10 | 6.42E-09 |
| ATP7B        | <a href="#">113251293</a> | -12.7644876 | -3.67406 | 4.72E-10 | 6.75E-09 |
| TBCEL        | <a href="#">113259945</a> | -12.7681596 | -3.67448 | 7.68E-13 | 1.85E-11 |
| LOC113247386 | <a href="#">113247386</a> | -12.7998113 | -3.67805 | 2.32E-14 | 7.22E-13 |
| P2RY8        | <a href="#">113240789</a> | -12.8832705 | -3.68743 | 2.97E-11 | 5.28E-10 |
| DCLRE1B      | <a href="#">113244400</a> | -12.9012726 | -3.68944 | 1.94E-12 | 4.34E-11 |
| LOC113267500 | <a href="#">113267500</a> | -12.9031769 | -3.68965 | 6.33E-13 | 1.55E-11 |
| CD82         | <a href="#">113265010</a> | -12.9429794 | -3.6941  | 5.55E-16 | 2.21E-14 |
| TNFAIP8      | <a href="#">113261627</a> | -12.9926804 | -3.69963 | 2.31E-14 | 7.2E-13  |
| DEF6         | <a href="#">113243839</a> | -13.0099782 | -3.70155 | 3.53E-10 | 5.19E-09 |
| ESM1         | <a href="#">113263920</a> | -13.0197506 | -3.70263 | 0.000252 | 0.001145 |
| CUNHXorf21   | <a href="#">113265831</a> | -13.0305154 | -3.70382 | 2.75E-09 | 3.36E-08 |
| WNT2         | <a href="#">113263284</a> | -13.0831555 | -3.70964 | 0.000294 | 0.001318 |
| CDC7         | <a href="#">113254416</a> | -13.107207  | -3.71229 | 7.08E-11 | 1.18E-09 |
| AGPAT4       | <a href="#">113259630</a> | -13.1083188 | -3.71241 | 3.77E-15 | 1.32E-13 |
| GIMAP1       | <a href="#">113249227</a> | -13.1379692 | -3.71567 | 2.68E-11 | 4.81E-10 |
| GIN5         | <a href="#">113252306</a> | -13.1458244 | -3.71653 | 4.18E-11 | 7.2E-10  |
| LIG1         | <a href="#">113243358</a> | -13.1753966 | -3.71977 | 1.05E-13 | 2.93E-12 |
| PCNA         | <a href="#">113258365</a> | -13.1926138 | -3.72166 | 6.07E-12 | 1.23E-10 |
| FAM3B        | <a href="#">113256873</a> | -13.2074482 | -3.72328 | 0.000103 | 0.000514 |
| MBOAT2       | <a href="#">113269649</a> | -13.2408763 | -3.72693 | 3.15E-06 | 2.2E-05  |
| FAM169B      | <a href="#">113263647</a> | -13.24837   | -3.72774 | 1.04E-08 | 1.14E-07 |

|              |                           |             |          |          |          |
|--------------|---------------------------|-------------|----------|----------|----------|
| NRGN         | <a href="#">113259917</a> | -13.2664493 | -3.72971 | 2.72E-08 | 2.76E-07 |
| RGS19        | <a href="#">113258832</a> | -13.2676439 | -3.72984 | 1.01E-11 | 1.97E-10 |
| CDA          | <a href="#">113268562</a> | -13.2797313 | -3.73115 | 2.22E-16 | 9.61E-15 |
| MCTP1        | <a href="#">113255083</a> | -13.3027627 | -3.73365 | 2.27E-10 | 3.44E-09 |
| LOC113258593 | <a href="#">113258593</a> | -13.3060631 | -3.73401 | 1.08E-12 | 2.52E-11 |
| LOC113245565 | <a href="#">113245565</a> | -13.3075297 | -3.73417 | 9.44E-07 | 7.23E-06 |
| CCDC88B      | <a href="#">113244170</a> | -13.3126176 | -3.73472 | 1.95E-11 | 3.6E-10  |
| LOC113247389 | <a href="#">113247389</a> | -13.3764447 | -3.74162 | 1.85E-10 | 2.84E-09 |
| CHEK1        | <a href="#">113259903</a> | -13.408682  | -3.7451  | 4.38E-11 | 7.5E-10  |
| SELPLG       | <a href="#">113267072</a> | -13.4343195 | -3.74785 | 6.66E-16 | 2.62E-14 |
| POC1A        | <a href="#">113256942</a> | -13.4972774 | -3.7546  | 8.15E-12 | 1.62E-10 |
| GCLM         | <a href="#">113254391</a> | -13.5882712 | -3.76429 | 1.59E-13 | 4.31E-12 |
| GTSE1        | <a href="#">113241642</a> | -13.6625074 | -3.77215 | 2.33E-11 | 4.25E-10 |
| APMAP        | <a href="#">113247940</a> | -13.7231492 | -3.77854 | 9.91E-13 | 2.35E-11 |
| NNMT         | <a href="#">113260035</a> | -13.833772  | -3.79012 | 1.47E-13 | 4E-12    |
| LOC113249892 | <a href="#">113249892</a> | -13.86531   | -3.79341 | 7.69E-10 | 1.05E-08 |
| ARHGAP4      | <a href="#">113247863</a> | -13.8772719 | -3.79465 | 9.25E-12 | 1.82E-10 |
| PYGL         | <a href="#">113266218</a> | -13.9035479 | -3.79738 | 2.06E-12 | 4.57E-11 |
| E2F1         | <a href="#">113258272</a> | -13.9306824 | -3.80019 | 0        | 0        |
| LRP8         | <a href="#">113254650</a> | -13.9503696 | -3.80223 | 1.36E-13 | 3.71E-12 |
| MILR1        | <a href="#">113265270</a> | -14.0443521 | -3.81192 | 1.4E-13  | 3.82E-12 |
| CP           | <a href="#">113254043</a> | -14.0446658 | -3.81195 | 5.54E-06 | 3.7E-05  |
| GPSM3        | <a href="#">113243768</a> | -14.1583379 | -3.82358 | 1.33E-11 | 2.54E-10 |
| GPR65        | <a href="#">113267388</a> | -14.3073783 | -3.83869 | 6.63E-10 | 9.19E-09 |
| DNAJC6       | <a href="#">113254567</a> | -14.3298526 | -3.84095 | 6.57E-09 | 7.43E-08 |
| KNTC1        | <a href="#">113266920</a> | -14.3665411 | -3.84464 | 1.17E-09 | 1.55E-08 |
| LOC113247174 | <a href="#">113247174</a> | -14.3925563 | -3.84725 | 1.6E-10  | 2.48E-09 |
| LOC113266586 | <a href="#">113266586</a> | -14.4035232 | -3.84835 | 2.81E-13 | 7.25E-12 |

|              |                           |             |          |          |          |
|--------------|---------------------------|-------------|----------|----------|----------|
| RHNO1        | <a href="#">113258018</a> | -14.5021789 | -3.8582  | 6.79E-14 | 1.94E-12 |
| DMXL2        | <a href="#">113269625</a> | -14.5109461 | -3.85907 | 4.44E-13 | 1.11E-11 |
| LOC113247411 | <a href="#">113247411</a> | -14.5509756 | -3.86304 | 3.21E-09 | 3.87E-08 |
| IL17RA       | <a href="#">113258053</a> | -14.5543696 | -3.86338 | 1.11E-09 | 1.48E-08 |
| WDR72        | <a href="#">113269641</a> | -14.5987012 | -3.86777 | 2.91E-10 | 4.34E-09 |
| G6PD         | <a href="#">113247831</a> | -14.627836  | -3.87064 | 0        | 0        |
| RBM47        | <a href="#">113262432</a> | -14.6376953 | -3.87162 | 2.64E-12 | 5.73E-11 |
| APBB1P       | <a href="#">113248698</a> | -14.6378952 | -3.87164 | 6.88E-13 | 1.68E-11 |
| B4GALT6      | <a href="#">113253319</a> | -14.6455783 | -3.87239 | 2.99E-11 | 5.31E-10 |
| ITGB3        | <a href="#">113265309</a> | -14.6499814 | -3.87283 | 3.24E-08 | 3.25E-07 |
| TARM1        | <a href="#">113247408</a> | -14.6658308 | -3.87439 | 1.21E-08 | 1.32E-07 |
| KCNJ15       | <a href="#">113258392</a> | -14.7623677 | -3.88385 | 7.27E-09 | 8.17E-08 |
| SASH3        | <a href="#">113270945</a> | -14.7925609 | -3.8868  | 6.07E-14 | 1.76E-12 |
| PTAFR        | <a href="#">113268423</a> | -14.7932813 | -3.88687 | 9.73E-14 | 2.74E-12 |
| ACPP         | <a href="#">113253937</a> | -14.8772648 | -3.89504 | 7.61E-09 | 8.51E-08 |
| LOC113249986 | <a href="#">113249986</a> | -14.8826212 | -3.89556 | 1.1E-10  | 1.76E-09 |
| EZH2         | <a href="#">113241452</a> | -14.9084214 | -3.89806 | 6.88E-15 | 2.3E-13  |
| ARID3A       | <a href="#">113242710</a> | -14.9194229 | -3.89912 | 8.88E-12 | 1.75E-10 |
| MEGF9        | <a href="#">113266346</a> | -14.9552719 | -3.90258 | 5.25E-10 | 7.44E-09 |
| TKT          | <a href="#">113256977</a> | -14.9726363 | -3.90426 | 5.39E-08 | 5.24E-07 |
| NCAPD3       | <a href="#">113259851</a> | -14.9770009 | -3.90468 | 5.54E-14 | 1.62E-12 |
| MCM3         | <a href="#">113261196</a> | -15.0030209 | -3.90718 | 2.03E-13 | 5.39E-12 |
| CLDND2       | <a href="#">113247281</a> | -15.0245136 | -3.90925 | 3.38E-07 | 2.81E-06 |
| ZWINT        | <a href="#">113258993</a> | -15.0600898 | -3.91266 | 5.56E-12 | 1.14E-10 |
| LRRC75B      | <a href="#">113247077</a> | -15.0811236 | -3.91467 | 1.07E-09 | 1.43E-08 |
| LOC113246651 | <a href="#">113246651</a> | -15.1131055 | -3.91773 | 1.78E-08 | 1.87E-07 |
| DOCK8        | <a href="#">113270185</a> | -15.1849092 | -3.92457 | 2.07E-10 | 3.15E-09 |
| LOC113247262 | <a href="#">113247262</a> | -15.2135827 | -3.92729 | 1.52E-09 | 1.96E-08 |

|              |                           |             |          |          |          |
|--------------|---------------------------|-------------|----------|----------|----------|
| CDKN3        | <a href="#">113242358</a> | -15.2163107 | -3.92755 | 1.74E-09 | 2.22E-08 |
| LOC113249395 | <a href="#">113249395</a> | -15.219929  | -3.92789 | 7.06E-11 | 1.18E-09 |
| CD3E         | <a href="#">113260003</a> | -15.2572134 | -3.93142 | 2.29E-10 | 3.46E-09 |
| LRMP         | <a href="#">113257496</a> | -15.2968598 | -3.93516 | 1.12E-14 | 3.64E-13 |
| FGR          | <a href="#">113268434</a> | -15.3206596 | -3.93741 | 3.6E-12  | 7.63E-11 |
| ARHGAP9      | <a href="#">113256382</a> | -15.3244954 | -3.93777 | 1.28E-11 | 2.46E-10 |
| INCENP       | <a href="#">113246995</a> | -15.3481123 | -3.93999 | 2.33E-15 | 8.43E-14 |
| TYROBP       | <a href="#">113244840</a> | -15.3502668 | -3.94019 | 1.55E-13 | 4.2E-12  |
| ABCA7        | <a href="#">113242716</a> | -15.4221358 | -3.94693 | 2E-15    | 7.28E-14 |
| LOC113245566 | <a href="#">113245566</a> | -15.4545569 | -3.94996 | 6.26E-08 | 6E-07    |
| MMP9         | <a href="#">113258671</a> | -15.4624721 | -3.9507  | 0.00018  | 0.00085  |
| PIK3R5       | <a href="#">113271196</a> | -15.4696022 | -3.95136 | 1.44E-15 | 5.4E-14  |
| DOK2         | <a href="#">113270015</a> | -15.4998125 | -3.95418 | 3.33E-16 | 1.39E-14 |
| BRIP1        | <a href="#">113268903</a> | -15.5159    | -3.95568 | 3.2E-11  | 5.64E-10 |
| IL1B         | <a href="#">113242506</a> | -15.5712262 | -3.96081 | 1.53E-08 | 1.63E-07 |
| LOC113258423 | <a href="#">113258423</a> | -15.5812949 | -3.96174 | 9.64E-10 | 1.3E-08  |
| DHCR24       | <a href="#">113254624</a> | -15.5869137 | -3.96226 | 1.17E-12 | 2.71E-11 |
| TSPAN2       | <a href="#">113244388</a> | -15.6080757 | -3.96422 | 2.49E-11 | 4.48E-10 |
| GCA          | <a href="#">113250834</a> | -15.6311751 | -3.96635 | 2.95E-12 | 6.35E-11 |
| ATAD5        | <a href="#">113268997</a> | -15.641235  | -3.96728 | 1.54E-11 | 2.9E-10  |
| CD53         | <a href="#">113244899</a> | -15.7002942 | -3.97272 | 2.56E-14 | 7.87E-13 |
| LIPA         | <a href="#">113258966</a> | -15.7179506 | -3.97434 | 6.85E-11 | 1.14E-09 |
| TNFSF13      | <a href="#">113271161</a> | -15.7331456 | -3.97574 | 1.11E-16 | 4.96E-15 |
| SNX22        | <a href="#">113240845</a> | -15.7801865 | -3.98004 | 1.9E-11  | 3.53E-10 |
| BIRC5        | <a href="#">113244569</a> | -15.8059599 | -3.9824  | 3.33E-15 | 1.17E-13 |
| CUNH5orf34   | <a href="#">113260956</a> | -15.8268161 | -3.9843  | 4.5E-10  | 6.45E-09 |
| ABRACL       | <a href="#">113259498</a> | -15.8406121 | -3.98556 | 0        | 0        |
| GMFG         | <a href="#">113243594</a> | -15.8586073 | -3.98719 | 6.06E-14 | 1.76E-12 |

|              |                           |             |          |          |          |
|--------------|---------------------------|-------------|----------|----------|----------|
| ARHGDIB      | <a href="#">113257847</a> | -15.8698502 | -3.98822 | 7.71E-11 | 1.27E-09 |
| TIMD4        | <a href="#">113264011</a> | -15.9324509 | -3.9939  | 0        | 0        |
| LCP2         | <a href="#">113264079</a> | -15.9418694 | -3.99475 | 7.43E-13 | 1.8E-11  |
| CUNH1orf112  | <a href="#">113262852</a> | -15.9781833 | -3.99803 | 1.02E-12 | 2.4E-11  |
| FGFBP1       | <a href="#">113266709</a> | -16.1127552 | -4.01013 | 4.52E-08 | 4.44E-07 |
| FANCA        | <a href="#">113252122</a> | -16.1209597 | -4.01087 | 3.26E-12 | 6.98E-11 |
| LOC113265197 | <a href="#">113265197</a> | -16.1276209 | -4.01146 | 6.37E-09 | 7.24E-08 |
| SEMA4A       | <a href="#">113245245</a> | -16.1304517 | -4.01171 | 1.59E-10 | 2.47E-09 |
| STAB2        | <a href="#">113256071</a> | -16.1707461 | -4.01531 | 9.11E-11 | 1.48E-09 |
| RPS6KA1      | <a href="#">113268455</a> | -16.1828868 | -4.0164  | 6.04E-13 | 1.48E-11 |
| PIK3CD       | <a href="#">113270537</a> | -16.2435192 | -4.02179 | 7.07E-12 | 1.42E-10 |
| PRAM1        | <a href="#">113242897</a> | -16.2530131 | -4.02264 | 1.73E-09 | 2.21E-08 |
| ART4         | <a href="#">113257852</a> | -16.3083265 | -4.02754 | 2.39E-11 | 4.33E-10 |
| CXCL6        | <a href="#">113263278</a> | -16.3834278 | -4.03417 | 9.98E-08 | 9.19E-07 |
| ARHGAP30     | <a href="#">113246713</a> | -16.4307205 | -4.03832 | 4.6E-13  | 1.15E-11 |
| TLR8         | <a href="#">113240729</a> | -16.5191387 | -4.04607 | 0        | 0        |
| NCAPD2       | <a href="#">113257978</a> | -16.5503824 | -4.04879 | 1.91E-13 | 5.12E-12 |
| FAM111A      | <a href="#">113246397</a> | -16.597933  | -4.05293 | 4.44E-16 | 1.8E-14  |
| TRPM2        | <a href="#">113251377</a> | -16.6155131 | -4.05446 | 5.96E-08 | 5.73E-07 |
| IL2RG        | <a href="#">113245610</a> | -16.7101388 | -4.06265 | 3.55E-13 | 9.02E-12 |
| DAPP1        | <a href="#">113263114</a> | -16.71944   | -4.06345 | 1.08E-11 | 2.1E-10  |
| NUP210       | <a href="#">113257232</a> | -16.7356114 | -4.06485 | 2.05E-12 | 4.54E-11 |
| SPDL1        | <a href="#">113264074</a> | -16.7445868 | -4.06562 | 4.98E-13 | 1.24E-11 |
| JCHAIN       | <a href="#">113263303</a> | -16.858743  | -4.07543 | 1.83E-05 | 0.000108 |
| RAD51AP1     | <a href="#">113257998</a> | -16.873309  | -4.07667 | 2.04E-13 | 5.41E-12 |
| PTPN6        | <a href="#">113257950</a> | -16.917408  | -4.08044 | 1.27E-14 | 4.09E-13 |
| LIMD2        | <a href="#">113265290</a> | -17.0065091 | -4.08802 | 7.63E-11 | 1.26E-09 |
| SLC16A14     | <a href="#">113250370</a> | -17.0480313 | -4.09153 | 9.66E-15 | 3.16E-13 |

|              |                           |             |          |          |          |
|--------------|---------------------------|-------------|----------|----------|----------|
| TEDC2        | <a href="#">113245100</a> | -17.1027276 | -4.09615 | 3.41E-12 | 7.26E-11 |
| SNX20        | <a href="#">113252229</a> | -17.134675  | -4.09885 | 1.02E-11 | 1.99E-10 |
| ADGRE1       | <a href="#">113242890</a> | -17.1413148 | -4.09941 | 3.33E-16 | 1.39E-14 |
| FANCD2       | <a href="#">113257160</a> | -17.143052  | -4.09955 | 9.99E-16 | 3.81E-14 |
| CDK6         | <a href="#">113259981</a> | -17.1632232 | -4.10125 | 3.28E-11 | 5.76E-10 |
| TRAF3IP3     | <a href="#">113262647</a> | -17.2393004 | -4.10763 | 5.63E-12 | 1.15E-10 |
| MPP2         | <a href="#">113265371</a> | -17.2625131 | -4.10957 | 0        | 0        |
| ARHGAP45     | <a href="#">113242717</a> | -17.3156121 | -4.114   | 2.51E-10 | 3.78E-09 |
| LOC113268943 | <a href="#">113268943</a> | -17.325824  | -4.11485 | 0        | 0        |
| PTPN22       | <a href="#">113244404</a> | -17.3409526 | -4.11611 | 6.86E-08 | 6.54E-07 |
| POLE         | <a href="#">113266839</a> | -17.3755871 | -4.11899 | 0        | 0        |
| SLC38A5      | <a href="#">113265913</a> | -17.404267  | -4.12137 | 4.11E-15 | 1.42E-13 |
| GIMAP7       | <a href="#">113249231</a> | -17.471849  | -4.12696 | 0        | 0        |
| PLEK         | <a href="#">113244715</a> | -17.475395  | -4.12725 | 6.73E-12 | 1.36E-10 |
| LYL1         | <a href="#">113247212</a> | -17.4936134 | -4.12876 | 1.85E-12 | 4.16E-11 |
| LOC113263118 | <a href="#">113263118</a> | -17.5123562 | -4.1303  | 1.08E-07 | 9.87E-07 |
| LOC113258421 | <a href="#">113258421</a> | -17.5228373 | -4.13116 | 8.1E-12  | 1.61E-10 |
| COL17A1      | <a href="#">113251900</a> | -17.5774754 | -4.13566 | 6.69E-09 | 7.56E-08 |
| RAB37        | <a href="#">113244666</a> | -17.6037708 | -4.13781 | 1.25E-08 | 1.35E-07 |
| SKA3         | <a href="#">113251177</a> | -17.6384231 | -4.14065 | 2.33E-14 | 7.23E-13 |
| NCF4         | <a href="#">113255983</a> | -17.7089683 | -4.14641 | 0        | 0        |
| RASAL3       | <a href="#">113248723</a> | -17.7868698 | -4.15274 | 2.47E-11 | 4.45E-10 |
| KCNA3        | <a href="#">113244900</a> | -17.7992397 | -4.15374 | 4.06E-11 | 7.01E-10 |
| LOC113243251 | <a href="#">113243251</a> | -17.8148052 | -4.155   | 4.86E-06 | 3.29E-05 |
| EMB          | <a href="#">113260963</a> | -17.8191743 | -4.15536 | 2.91E-10 | 4.34E-09 |
| TOM1L1       | <a href="#">113265649</a> | -17.8442354 | -4.15739 | 1.66E-10 | 2.56E-09 |
| SYK          | <a href="#">113270132</a> | -17.8806157 | -4.16032 | 1.8E-13  | 4.84E-12 |
| PIP5K1B      | <a href="#">113270193</a> | -17.9166264 | -4.16323 | 1.27E-11 | 2.44E-10 |

|              |                           |             |          |          |          |
|--------------|---------------------------|-------------|----------|----------|----------|
| LOC113244815 | <a href="#">113244815</a> | -17.9307696 | -4.16437 | 1.98E-10 | 3.02E-09 |
| FHDC1        | <a href="#">113255765</a> | -18.0573748 | -4.17452 | 2.62E-13 | 6.81E-12 |
| TAL1         | <a href="#">113254708</a> | -18.0635945 | -4.17501 | 1.47E-10 | 2.29E-09 |
| DOK3         | <a href="#">113264158</a> | -18.1108442 | -4.17878 | 6.96E-13 | 1.7E-11  |
| CSF2RA       | <a href="#">113240793</a> | -18.1114793 | -4.17883 | 9.8E-13  | 2.33E-11 |
| PTPRC        | <a href="#">113242583</a> | -18.1785058 | -4.18416 | 6.72E-12 | 1.36E-10 |
| MARCH1       | <a href="#">113255820</a> | -18.2663344 | -4.19112 | 3.36E-11 | 5.88E-10 |
| TBC1D10C     | <a href="#">113244031</a> | -18.5423432 | -4.21275 | 3.88E-10 | 5.65E-09 |
| YOD1         | <a href="#">113242605</a> | -18.5732675 | -4.21516 | 1.33E-11 | 2.54E-10 |
| MPIG6B       | <a href="#">113243758</a> | -18.5929045 | -4.21668 | 4.49E-08 | 4.43E-07 |
| STXBP2       | <a href="#">113242928</a> | -18.6582556 | -4.22174 | 1.11E-16 | 4.96E-15 |
| TREM1        | <a href="#">113261313</a> | -18.8649014 | -4.23763 | 2.04E-11 | 3.77E-10 |
| IGSF6        | <a href="#">113267561</a> | -18.9386164 | -4.24326 | 2.49E-14 | 7.66E-13 |
| BDH1         | <a href="#">113253271</a> | -18.9675628 | -4.24546 | 2E-15    | 7.28E-14 |
| VAV1         | <a href="#">113242671</a> | -19.0446821 | -4.25132 | 3.89E-14 | 1.16E-12 |
| ADGRE3       | <a href="#">113247149</a> | -19.0865655 | -4.25449 | 2.19E-09 | 2.75E-08 |
| OXCT1        | <a href="#">113260937</a> | -19.2854628 | -4.26944 | 1.78E-15 | 6.58E-14 |
| SPI1         | <a href="#">113264961</a> | -19.3347906 | -4.27313 | 4E-15    | 1.39E-13 |
| MZB1         | <a href="#">113261808</a> | -19.4198122 | -4.27946 | 2.75E-09 | 3.36E-08 |
| TMEM273      | <a href="#">113243112</a> | -19.4903899 | -4.28469 | 3.57E-13 | 9.06E-12 |
| KIF15        | <a href="#">113256766</a> | -19.5091614 | -4.28608 | 0        | 0        |
| CSTA         | <a href="#">113252227</a> | -19.5429325 | -4.28858 | 6.35E-14 | 1.83E-12 |
| P2RY13       | <a href="#">113254067</a> | -19.5444157 | -4.28868 | 2.49E-09 | 3.07E-08 |
| LOC113243250 | <a href="#">113243250</a> | -19.601702  | -4.29291 | 9.84E-07 | 7.52E-06 |
| PLK4         | <a href="#">113255653</a> | -19.6100926 | -4.29352 | 6.66E-16 | 2.62E-14 |
| CD37         | <a href="#">113243308</a> | -19.632283  | -4.29516 | 2.54E-12 | 5.53E-11 |
| LOC113265198 | <a href="#">113265198</a> | -19.6353075 | -4.29538 | 1.35E-11 | 2.57E-10 |
| LOC113267721 | <a href="#">113267721</a> | -19.6477565 | -4.29629 | 1.89E-15 | 6.93E-14 |

|              |                           |             |          |          |          |
|--------------|---------------------------|-------------|----------|----------|----------|
| BCL2L15      | <a href="#">113244403</a> | -19.6614214 | -4.2973  | 5.11E-08 | 4.98E-07 |
| MCTP2        | <a href="#">113263658</a> | -19.6775409 | -4.29848 | 9.33E-11 | 1.51E-09 |
| LOC113249403 | <a href="#">113249403</a> | -19.7931939 | -4.30693 | 2.2E-08  | 2.27E-07 |
| CDCA3        | <a href="#">113257959</a> | -19.7948849 | -4.30706 | 0        | 0        |
| SYTL1        | <a href="#">113268439</a> | -19.8323199 | -4.30978 | 1.47E-09 | 1.91E-08 |
| FERMT3       | <a href="#">113244183</a> | -19.8432331 | -4.31058 | 1.69E-12 | 3.82E-11 |
| ATP8B4       | <a href="#">113269606</a> | -19.8665723 | -4.31227 | 1E-13    | 2.8E-12  |
| APOBR        | <a href="#">113267635</a> | -19.9292744 | -4.31682 | 1.81E-08 | 1.89E-07 |
| AFF2         | <a href="#">113241893</a> | -19.9688945 | -4.31968 | 3.32E-10 | 4.9E-09  |
| LMNB1        | <a href="#">113261670</a> | -20.0481027 | -4.32539 | 3.11E-15 | 1.1E-13  |
| ACSS1        | <a href="#">113247933</a> | -20.0541863 | -4.32583 | 2.22E-13 | 5.85E-12 |
| SGO2         | <a href="#">113250609</a> | -20.129296  | -4.33122 | 1.11E-16 | 4.96E-15 |
| LOC113268946 | <a href="#">113268946</a> | -20.139342  | -4.33194 | 0        | 0        |
| FANCI        | <a href="#">113263684</a> | -20.1431293 | -4.33222 | 1.89E-15 | 6.93E-14 |
| ITGAL        | <a href="#">113267681</a> | -20.1757306 | -4.33455 | 1.39E-10 | 2.17E-09 |
| RECQL4       | <a href="#">113247590</a> | -20.2089209 | -4.33692 | 6.66E-16 | 2.62E-14 |
| TEDC1        | <a href="#">113267146</a> | -20.2373206 | -4.33895 | 1.35E-11 | 2.57E-10 |
| CD177        | <a href="#">113243501</a> | -20.2674079 | -4.34109 | 6.63E-07 | 5.22E-06 |
| WAS          | <a href="#">113265921</a> | -20.2975435 | -4.34323 | 7.75E-13 | 1.86E-11 |
| AURKB        | <a href="#">113271177</a> | -20.3489962 | -4.34689 | 4.01E-14 | 1.19E-12 |
| LTB4R        | <a href="#">113246010</a> | -20.5012756 | -4.35764 | 3.62E-09 | 4.31E-08 |
| RAB39A       | <a href="#">113260103</a> | -20.5826339 | -4.36336 | 8.58E-12 | 1.7E-10  |
| PLCB2        | <a href="#">113242038</a> | -20.5859732 | -4.36359 | 1.42E-10 | 2.22E-09 |
| CKS2         | <a href="#">113270124</a> | -20.8750745 | -4.38371 | 0        | 0        |
| ZBP1         | <a href="#">113258759</a> | -20.8962358 | -4.38517 | 4.44E-16 | 1.8E-14  |
| CD4          | <a href="#">113257962</a> | -20.911203  | -4.3862  | 2.68E-08 | 2.72E-07 |
| MMS22L       | <a href="#">113264807</a> | -20.9433202 | -4.38842 | 5.77E-15 | 1.97E-13 |
| COL9A2       | <a href="#">113268232</a> | -21.0410011 | -4.39513 | 4.41E-09 | 5.16E-08 |

|              |                           |             |          |          |          |
|--------------|---------------------------|-------------|----------|----------|----------|
| IKZF3        | <a href="#">113265509</a> | -21.0664394 | -4.39687 | 1.52E-09 | 1.96E-08 |
| THEMIS2      | <a href="#">113268427</a> | -21.1008511 | -4.39923 | 3.11E-12 | 6.68E-11 |
| ITGA2B       | <a href="#">113265351</a> | -21.2066817 | -4.40645 | 1.77E-10 | 2.72E-09 |
| CUNH19orf38  | <a href="#">113243003</a> | -21.2454105 | -4.40908 | 1.17E-09 | 1.55E-08 |
| SLC6A9       | <a href="#">113254771</a> | -21.3029038 | -4.41298 | 6.44E-15 | 2.17E-13 |
| TFEC         | <a href="#">113263173</a> | -21.3492887 | -4.41612 | 2.22E-16 | 9.61E-15 |
| CMTM5        | <a href="#">113246086</a> | -21.4733399 | -4.42447 | 3.54E-08 | 3.54E-07 |
| NCKAP1L      | <a href="#">113257513</a> | -21.5315446 | -4.42838 | 1.54E-14 | 4.88E-13 |
| SEPT1        | <a href="#">113267508</a> | -21.5891688 | -4.43224 | 2.43E-09 | 3.01E-08 |
| ALOX5AP      | <a href="#">113251228</a> | -21.6063404 | -4.43338 | 3.33E-16 | 1.39E-14 |
| LOC113265816 | <a href="#">113265816</a> | -21.6151033 | -4.43397 | 9.66E-10 | 1.3E-08  |
| NFAM1        | <a href="#">113241698</a> | -21.7058387 | -4.44001 | 1.11E-16 | 4.96E-15 |
| TBXAS1       | <a href="#">113264996</a> | -21.9870178 | -4.45858 | 0        | 0        |
| TRIM59       | <a href="#">113254138</a> | -21.9975341 | -4.45927 | 1.11E-16 | 4.96E-15 |
| ENTPD3       | <a href="#">113253806</a> | -22.0311247 | -4.46147 | 1.68E-07 | 1.48E-06 |
| PAQR8        | <a href="#">113261194</a> | -22.0578516 | -4.46322 | 4.69E-12 | 9.75E-11 |
| DPYD         | <a href="#">113254371</a> | -22.090128  | -4.46533 | 0        | 0        |
| LOC113254439 | <a href="#">113254439</a> | -22.0950174 | -4.46565 | 3E-15    | 1.06E-13 |
| BIN2         | <a href="#">113257606</a> | -22.1554982 | -4.46959 | 1.68E-12 | 3.81E-11 |
| LOC113247268 | <a href="#">113247268</a> | -22.1627573 | -4.47007 | 1.25E-09 | 1.64E-08 |
| MMP25        | <a href="#">113245428</a> | -22.1814861 | -4.47128 | 1.89E-11 | 3.51E-10 |
| RGS18        | <a href="#">113268745</a> | -22.3945307 | -4.48507 | 1.02E-09 | 1.36E-08 |
| TPX2         | <a href="#">113258463</a> | -22.5310784 | -4.49384 | 1.22E-15 | 4.64E-14 |
| UHRF1        | <a href="#">113242848</a> | -22.5350661 | -4.4941  | 0        | 0        |
| LOC113250056 | <a href="#">113250056</a> | -22.5718309 | -4.49645 | 1.5E-14  | 4.75E-13 |
| SMC2         | <a href="#">113260354</a> | -22.5752711 | -4.49667 | 0        | 0        |
| SLC9A3R1     | <a href="#">113244663</a> | -22.6003916 | -4.49828 | 1.18E-14 | 3.81E-13 |
| LOC113265199 | <a href="#">113265199</a> | -22.6057921 | -4.49862 | 0        | 0        |

|              |                           |             |          |          |          |
|--------------|---------------------------|-------------|----------|----------|----------|
| CXCR4        | <a href="#">113263416</a> | -22.6604289 | -4.5021  | 1.38E-11 | 2.62E-10 |
| PRKCB        | <a href="#">113267584</a> | -22.6691179 | -4.50266 | 1.33E-12 | 3.06E-11 |
| MCM2         | <a href="#">113257273</a> | -22.6978494 | -4.50448 | 0        | 0        |
| LOC113247343 | <a href="#">113247343</a> | -22.7963833 | -4.51073 | 1.32E-08 | 1.42E-07 |
| OIP5         | <a href="#">113242010</a> | -22.8429509 | -4.51368 | 3.1E-14  | 9.38E-13 |
| CCND3        | <a href="#">113261302</a> | -23.1230099 | -4.53126 | 2.5E-13  | 6.54E-12 |
| HCK          | <a href="#">113258471</a> | -23.146918  | -4.53275 | 2.45E-11 | 4.42E-10 |
| GGT1         | <a href="#">113247032</a> | -23.1761585 | -4.53457 | 8.31E-09 | 9.27E-08 |
| IL1RN        | <a href="#">113242510</a> | -23.2155439 | -4.53702 | 4.34E-14 | 1.28E-12 |
| SPAG5        | <a href="#">113269037</a> | -23.216044  | -4.53705 | 0        | 0        |
| TNFRSF8      | <a href="#">113270667</a> | -23.2337602 | -4.53815 | 8.47E-11 | 1.38E-09 |
| ITGAX        | <a href="#">113267724</a> | -23.2483806 | -4.53906 | 6.22E-15 | 2.1E-13  |
| CLEC12A      | <a href="#">113257906</a> | -23.3500128 | -4.54535 | 5.55E-16 | 2.21E-14 |
| DOCK2        | <a href="#">113264075</a> | -23.5076902 | -4.55506 | 4.44E-16 | 1.8E-14  |
| LCP1         | <a href="#">113251344</a> | -23.6281288 | -4.56243 | 3.64E-11 | 6.34E-10 |
| HMGB2        | <a href="#">113269903</a> | -23.7380086 | -4.56913 | 7.11E-11 | 1.18E-09 |
| MCM6         | <a href="#">113263419</a> | -23.7416914 | -4.56935 | 0        | 0        |
| SLA          | <a href="#">113252705</a> | -23.8453927 | -4.57564 | 1.27E-10 | 1.99E-09 |
| TIMELESS     | <a href="#">113256418</a> | -23.8710479 | -4.57719 | 0        | 0        |
| AP3M2        | <a href="#">113245532</a> | -23.9811017 | -4.58383 | 1.97E-12 | 4.39E-11 |
| ORC1         | <a href="#">113254668</a> | -24.1110063 | -4.59162 | 0        | 0        |
| NUF2         | <a href="#">113268684</a> | -24.1399573 | -4.59335 | 0        | 0        |
| PTPN7        | <a href="#">113242538</a> | -24.3492911 | -4.60581 | 1.4E-11  | 2.64E-10 |
| ITGB2        | <a href="#">113250821</a> | -24.5000352 | -4.61471 | 9.9E-12  | 1.94E-10 |
| PTK2B        | <a href="#">113269957</a> | -24.5550965 | -4.61795 | 4.27E-13 | 1.08E-11 |
| CXCL9        | <a href="#">113263257</a> | -24.6529673 | -4.62369 | 1.37E-10 | 2.14E-09 |
| CA2          | <a href="#">113252986</a> | -24.6599652 | -4.6241  | 4.9E-09  | 5.71E-08 |
| FRRS1        | <a href="#">113254364</a> | -24.7100028 | -4.62702 | 1.36E-12 | 3.12E-11 |

|              |                           |             |          |          |          |
|--------------|---------------------------|-------------|----------|----------|----------|
| ADAM8        | <a href="#">113252090</a> | -24.8554909 | -4.63549 | 6.64E-14 | 1.9E-12  |
| ALOX5        | <a href="#">113243124</a> | -24.9447391 | -4.64066 | 7.65E-10 | 1.05E-08 |
| NCF2         | <a href="#">113262736</a> | -25.0714408 | -4.64797 | 6.37E-14 | 1.83E-12 |
| NUSAP1       | <a href="#">113242008</a> | -25.3355362 | -4.66309 | 0        | 0        |
| FYB1         | <a href="#">113260918</a> | -25.4023312 | -4.66689 | 5.11E-14 | 1.5E-12  |
| SNX10        | <a href="#">113261796</a> | -25.5357887 | -4.67445 | 1.67E-12 | 3.8E-11  |
| LOC113258420 | <a href="#">113258420</a> | -25.7563933 | -4.68686 | 8.37E-13 | 2E-11    |
| SAMSN1       | <a href="#">113245916</a> | -25.9968612 | -4.70027 | 5.97E-11 | 1E-09    |
| SLC11A1      | <a href="#">113250457</a> | -26.1623958 | -4.70942 | 6.53E-13 | 1.6E-11  |
| ORC6         | <a href="#">113252201</a> | -26.444289  | -4.72488 | 8.55E-14 | 2.42E-12 |
| EPX          | <a href="#">113269172</a> | -26.6645361 | -4.73685 | 1.45E-05 | 8.81E-05 |
| DIAPH3       | <a href="#">113251398</a> | -26.8052927 | -4.74445 | 0        | 0        |
| CENPU        | <a href="#">113262261</a> | -26.9163607 | -4.75041 | 0        | 0        |
| PLK1         | <a href="#">113267582</a> | -27.0421149 | -4.75714 | 0        | 0        |
| MYO1F        | <a href="#">113242896</a> | -27.6326251 | -4.7883  | 1.05E-12 | 2.47E-11 |
| SLC43A3      | <a href="#">113246559</a> | -27.6488742 | -4.78915 | 1.56E-09 | 2.01E-08 |
| RAD51        | <a href="#">113242027</a> | -28.1115442 | -4.81309 | 0        | 0        |
| NPTX1        | <a href="#">113244533</a> | -28.1211955 | -4.81359 | 2.56E-09 | 3.15E-08 |
| LOC113265231 | <a href="#">113265231</a> | -28.1704314 | -4.81611 | 5.65E-12 | 1.15E-10 |
| RAC2         | <a href="#">113241811</a> | -28.2501182 | -4.82018 | 1.3E-10  | 2.04E-09 |
| JAK3         | <a href="#">113256691</a> | -28.2888714 | -4.82216 | 1.3E-11  | 2.49E-10 |
| FASN         | <a href="#">113244480</a> | -28.3570595 | -4.82564 | 5.41E-07 | 4.33E-06 |
| BRCA2        | <a href="#">113251242</a> | -28.8590866 | -4.85095 | 2.22E-16 | 9.61E-15 |
| AQP9         | <a href="#">113269677</a> | -28.8607475 | -4.85104 | 7.18E-11 | 1.19E-09 |
| CORO1A       | <a href="#">113267639</a> | -28.9279025 | -4.85439 | 3.61E-11 | 6.3E-10  |
| LAIR1        | <a href="#">113247419</a> | -29.003596  | -4.85816 | 6.24E-09 | 7.09E-08 |
| CD33         | <a href="#">113247272</a> | -29.0354055 | -4.85974 | 4.7E-13  | 1.17E-11 |
| S100P        | <a href="#">113245673</a> | -29.1538679 | -4.86562 | 2.94E-11 | 5.24E-10 |

|              |                           |             |          |          |          |
|--------------|---------------------------|-------------|----------|----------|----------|
| POLE2        | <a href="#">113266191</a> | -29.3503578 | -4.87531 | 2.25E-14 | 7.04E-13 |
| PADI4        | <a href="#">113270443</a> | -29.4068842 | -4.87808 | 1E-08    | 1.1E-07  |
| TENT5C       | <a href="#">113244369</a> | -29.6905637 | -4.89193 | 6.8E-13  | 1.66E-11 |
| ITGAM        | <a href="#">113267723</a> | -29.8508025 | -4.8997  | 1.38E-14 | 4.4E-13  |
| CHI3L1       | <a href="#">113242521</a> | -30.0566485 | -4.90961 | 8.69E-08 | 8.1E-07  |
| TREML1       | <a href="#">113261319</a> | -30.2331463 | -4.91806 | 4.1E-10  | 5.92E-09 |
| NCF1         | <a href="#">113267772</a> | -30.2648017 | -4.91957 | 7.67E-10 | 1.05E-08 |
| CFP          | <a href="#">113265985</a> | -30.2670349 | -4.91968 | 0        | 0        |
| FANCM        | <a href="#">113266177</a> | -30.3040415 | -4.92144 | 1.3E-14  | 4.18E-13 |
| IPCEF1       | <a href="#">113259578</a> | -30.4527641 | -4.9285  | 7.66E-13 | 1.85E-11 |
| ZFPM1        | <a href="#">113252155</a> | -30.526485  | -4.93199 | 3.33E-16 | 1.39E-14 |
| LOC113261316 | <a href="#">113261316</a> | -30.5670877 | -4.93391 | 3.76E-08 | 3.75E-07 |
| SELL         | <a href="#">113262856</a> | -30.6456027 | -4.93761 | 1.94E-10 | 2.97E-09 |
| ANLN         | <a href="#">113262779</a> | -30.792748  | -4.94452 | 0        | 0        |
| CD300LF      | <a href="#">113244664</a> | -30.8148709 | -4.94555 | 4.91E-10 | 7E-09    |
| ARHGAP15     | <a href="#">113263395</a> | -31.021316  | -4.95519 | 1.09E-12 | 2.54E-11 |
| MTHFD2       | <a href="#">113243787</a> | -31.0310216 | -4.95564 | 2.61E-13 | 6.8E-12  |
| ACACA        | <a href="#">113268927</a> | -31.1425129 | -4.96081 | 1.16E-08 | 1.26E-07 |
| DSN1         | <a href="#">113258564</a> | -31.4333459 | -4.97422 | 0        | 0        |
| PCED1B       | <a href="#">113257691</a> | -31.5369741 | -4.97897 | 2.38E-13 | 6.28E-12 |
| BUB1B        | <a href="#">113242041</a> | -31.7820387 | -4.99014 | 0        | 0        |
| PTTG1        | <a href="#">113264047</a> | -31.8873824 | -4.99491 | 0        | 0        |
| SERPINB10    | <a href="#">113253500</a> | -32.1936355 | -5.0087  | 6.89E-11 | 1.15E-09 |
| KIF4A        | <a href="#">113245588</a> | -32.3711249 | -5.01664 | 0        | 0        |
| CES2         | <a href="#">113252340</a> | -32.3739582 | -5.01676 | 6.88E-11 | 1.15E-09 |
| BPI          | <a href="#">113258590</a> | -32.4529092 | -5.02028 | 0        | 0        |
| LOC113250055 | <a href="#">113250055</a> | -32.4562583 | -5.02042 | 0        | 0        |
| SASS6        | <a href="#">113254358</a> | -32.5242309 | -5.02344 | 1.11E-16 | 4.96E-15 |

|              |                           |             |          |          |          |
|--------------|---------------------------|-------------|----------|----------|----------|
| TMCC2        | <a href="#">113242491</a> | -32.570261  | -5.02548 | 2.82E-13 | 7.26E-12 |
| B3GNT5       | <a href="#">113254536</a> | -32.6719407 | -5.02998 | 9.93E-14 | 2.78E-12 |
| ELOVL6       | <a href="#">113255564</a> | -32.711297  | -5.03172 | 1.72E-09 | 2.19E-08 |
| TYMS         | <a href="#">113253260</a> | -32.7838125 | -5.03491 | 0        | 0        |
| LOC113267145 | <a href="#">113267145</a> | -32.8339248 | -5.03712 | 1.17E-06 | 8.81E-06 |
| IKZF1        | <a href="#">113257553</a> | -32.8349734 | -5.03716 | 5.55E-16 | 2.21E-14 |
| IQGAP3       | <a href="#">113245228</a> | -33.1159761 | -5.04946 | 0        | 0        |
| PCK2         | <a href="#">113246063</a> | -33.1983905 | -5.05304 | 0        | 0        |
| IL18R1       | <a href="#">113247412</a> | -33.2304484 | -5.05443 | 4.4E-11  | 7.52E-10 |
| PGLYRP1      | <a href="#">113243405</a> | -33.4505867 | -5.06396 | 1.29E-07 | 1.16E-06 |
| F5           | <a href="#">113262860</a> | -33.6074088 | -5.07071 | 5.11E-12 | 1.05E-10 |
| SLCO4C1      | <a href="#">113255033</a> | -33.8262685 | -5.08007 | 2.22E-16 | 9.61E-15 |
| MCEMP1       | <a href="#">113242925</a> | -33.8634609 | -5.08166 | 8.88E-16 | 3.42E-14 |
| EVI2B        | <a href="#">113269008</a> | -34.1650612 | -5.09445 | 5.15E-13 | 1.28E-11 |
| TAGAP        | <a href="#">113259611</a> | -34.3245992 | -5.10117 | 2.52E-13 | 6.59E-12 |
| NAPSA        | <a href="#">113247269</a> | -34.3573139 | -5.10255 | 4.04E-10 | 5.85E-09 |
| TFR2         | <a href="#">113267851</a> | -34.4652813 | -5.10707 | 3.33E-16 | 1.39E-14 |
| CCNE2        | <a href="#">113252919</a> | -35.141901  | -5.13512 | 0        | 0        |
| CDCA5        | <a href="#">113244138</a> | -35.4793627 | -5.14891 | 1.11E-16 | 4.96E-15 |
| CSF3R        | <a href="#">113268281</a> | -35.4930533 | -5.14946 | 2.94E-10 | 4.37E-09 |
| FBXO5        | <a href="#">113259573</a> | -35.5316764 | -5.15103 | 0        | 0        |
| CST7         | <a href="#">113247929</a> | -35.8168579 | -5.16257 | 7.58E-11 | 1.25E-09 |
| MBNL3        | <a href="#">113270963</a> | -36.0514265 | -5.17198 | 0        | 0        |
| KIF20A       | <a href="#">113261782</a> | -36.1622573 | -5.17641 | 0        | 0        |
| RMI2         | <a href="#">113270796</a> | -36.1977395 | -5.17783 | 1.11E-16 | 4.96E-15 |
| SLC7A5       | <a href="#">113252161</a> | -36.2216342 | -5.17878 | 2.36E-14 | 7.32E-13 |
| PAQR9        | <a href="#">113254023</a> | -36.2659648 | -5.18054 | 1.04E-12 | 2.46E-11 |
| ITGA4        | <a href="#">113250699</a> | -36.3276758 | -5.183   | 1.93E-13 | 5.15E-12 |

|              |                           |             |          |          |          |
|--------------|---------------------------|-------------|----------|----------|----------|
| SRGN         | <a href="#">113259122</a> | -36.3320078 | -5.18317 | 3.79E-14 | 1.14E-12 |
| CKAP2        | <a href="#">113251289</a> | -36.4210669 | -5.1867  | 0        | 0        |
| LOC113254033 | <a href="#">113254033</a> | -36.9228861 | -5.20644 | 9.21E-15 | 3.03E-13 |
| MGST1        | <a href="#">113257838</a> | -37.2011841 | -5.21728 | 8.23E-13 | 1.97E-11 |
| TREML2       | <a href="#">113261315</a> | -37.2657677 | -5.21978 | 1.11E-09 | 1.48E-08 |
| CXCR2        | <a href="#">113250472</a> | -37.4293    | -5.2261  | 2.41E-12 | 5.29E-11 |
| CENPN        | <a href="#">113252521</a> | -37.6819806 | -5.2358  | 0        | 0        |
| CDC20        | <a href="#">113254788</a> | -38.0963261 | -5.25158 | 0        | 0        |
| LOC113267312 | <a href="#">113267312</a> | -38.2888738 | -5.25885 | 7.31E-13 | 1.77E-11 |
| LOC113243522 | <a href="#">113243522</a> | -38.6092561 | -5.27087 | 8.63E-14 | 2.43E-12 |
| THRSP        | <a href="#">113269363</a> | -38.7528255 | -5.27623 | 4.66E-10 | 6.67E-09 |
| TMC8         | <a href="#">113244577</a> | -38.8666524 | -5.28046 | 1.11E-16 | 4.96E-15 |
| CENPW        | <a href="#">113259421</a> | -39.3039163 | -5.2966  | 0        | 0        |
| ARHGEF39     | <a href="#">113260476</a> | -39.461893  | -5.30239 | 2.33E-15 | 8.43E-14 |
| CDCA2        | <a href="#">113269969</a> | -39.6541803 | -5.3094  | 0        | 0        |
| USP35        | <a href="#">113269368</a> | -39.9864025 | -5.32144 | 2.22E-16 | 9.61E-15 |
| DGAT2        | <a href="#">113269335</a> | -40.3590021 | -5.33482 | 2.29E-10 | 3.46E-09 |
| PRG2         | <a href="#">113246560</a> | -40.9096912 | -5.35437 | 2.06E-06 | 1.48E-05 |
| FUT1         | <a href="#">113243333</a> | -41.0254905 | -5.35845 | 1.47E-09 | 1.9E-08  |
| LOC113242534 | <a href="#">113242534</a> | -41.3204763 | -5.36878 | 0        | 0        |
| LOC113248477 | <a href="#">113248477</a> | -41.3329491 | -5.36922 | 0        | 0        |
| MARCO        | <a href="#">113263449</a> | -41.3377297 | -5.36939 | 6.66E-15 | 2.24E-13 |
| ICAM3        | <a href="#">113242982</a> | -41.5087178 | -5.37534 | 0        | 0        |
| FOXMI        | <a href="#">113258019</a> | -41.7440948 | -5.3835  | 0        | 0        |
| SEPT12       | <a href="#">113270833</a> | -42.3424343 | -5.40403 | 5.55E-16 | 2.21E-14 |
| SLC7A4       | <a href="#">113245910</a> | -43.2059012 | -5.43316 | 2.15E-14 | 6.76E-13 |
| CCNA2        | <a href="#">113255629</a> | -43.8068952 | -5.45309 | 0        | 0        |
| SPN          | <a href="#">113267673</a> | -43.8642173 | -5.45497 | 1.8E-12  | 4.06E-11 |

|              |                           |             |          |          |          |
|--------------|---------------------------|-------------|----------|----------|----------|
| HPSE         | <a href="#">113263199</a> | -45.4508416 | -5.50624 | 0        | 0        |
| LTF          | <a href="#">113256793</a> | -45.7429268 | -5.51548 | 3.37E-06 | 2.34E-05 |
| KNSTRN       | <a href="#">113241921</a> | -46.2968306 | -5.53284 | 0        | 0        |
| CEBPE        | <a href="#">113245996</a> | -46.4712993 | -5.53827 | 2.75E-11 | 4.91E-10 |
| NFE2         | <a href="#">113257521</a> | -46.5539686 | -5.54083 | 2.25E-11 | 4.1E-10  |
| LYZ          | <a href="#">113256289</a> | -48.1166916 | -5.58847 | 4.44E-08 | 4.37E-07 |
| LOC113247060 | <a href="#">113247060</a> | -48.2675009 | -5.59298 | 1.04E-07 | 9.57E-07 |
| PRC1         | <a href="#">113263713</a> | -49.721078  | -5.63579 | 0        | 0        |
| CD5L         | <a href="#">113246669</a> | -50.1686342 | -5.64871 | 3.61E-10 | 5.3E-09  |
| LOC113244977 | <a href="#">113244977</a> | -50.3809509 | -5.65481 | 2.55E-14 | 7.85E-13 |
| ATAD2        | <a href="#">113252754</a> | -50.7402035 | -5.66506 | 0        | 0        |
| TACC3        | <a href="#">113245668</a> | -50.7511292 | -5.66537 | 0        | 0        |
| CCNB1        | <a href="#">113255260</a> | -51.3991487 | -5.68367 | 0        | 0        |
| FADS2        | <a href="#">113246983</a> | -51.9925281 | -5.70023 | 4.4E-13  | 1.1E-11  |
| ASF1B        | <a href="#">113247134</a> | -52.0165442 | -5.7009  | 0        | 0        |
| HMMR         | <a href="#">113264055</a> | -53.4146867 | -5.73916 | 0        | 0        |
| KIFC1        | <a href="#">113243806</a> | -53.8346353 | -5.75046 | 0        | 0        |
| CDH1         | <a href="#">113252413</a> | -53.8539076 | -5.75098 | 7E-12    | 1.41E-10 |
| LOC113252448 | <a href="#">113252448</a> | -54.360117  | -5.76448 | 1.02E-13 | 2.85E-12 |
| S100A9       | <a href="#">113245349</a> | -55.1509624 | -5.78531 | 3.13E-07 | 2.62E-06 |
| MCM4         | <a href="#">113268118</a> | -55.7806639 | -5.80169 | 0        | 0        |
| TCF19        | <a href="#">113264340</a> | -55.9649441 | -5.80645 | 0        | 0        |
| E2F8         | <a href="#">113264938</a> | -57.5635205 | -5.84708 | 0        | 0        |
| LOC113249696 | <a href="#">113249696</a> | -58.6291451 | -5.87355 | 7.59E-09 | 8.49E-08 |
| MYB          | <a href="#">113259474</a> | -59.8861956 | -5.90415 | 1.68E-12 | 3.81E-11 |
| KIF11        | <a href="#">113243170</a> | -60.8943564 | -5.92824 | 0        | 0        |
| TK1          | <a href="#">113244571</a> | -61.3837403 | -5.93978 | 0        | 0        |
| S100A8       | <a href="#">113245155</a> | -63.1767502 | -5.98132 | 8.01E-08 | 7.55E-07 |

|              |                           |             |          |          |          |
|--------------|---------------------------|-------------|----------|----------|----------|
| MGARP        | <a href="#">113255684</a> | -64.8445768 | -6.01891 | 3E-15    | 1.06E-13 |
| NAT8L        | <a href="#">113245722</a> | -65.2111129 | -6.02705 | 2.59E-12 | 5.63E-11 |
| CIT          | <a href="#">113267030</a> | -65.4290847 | -6.03186 | 0        | 0        |
| CAMP         | <a href="#">113256532</a> | -67.7756383 | -6.08269 | 5.13E-07 | 4.11E-06 |
| LOC113245348 | <a href="#">113245348</a> | -72.4009686 | -6.17794 | 1.21E-08 | 1.31E-07 |
| TSPAN33      | <a href="#">113264015</a> | -72.8878587 | -6.18761 | 0        | 0        |
| TOP2A        | <a href="#">113265488</a> | -73.2017481 | -6.19381 | 0        | 0        |
| YPEL4        | <a href="#">113246391</a> | -75.3361543 | -6.23527 | 0        | 0        |
| FADS1        | <a href="#">113246984</a> | -75.7769705 | -6.24369 | 1.41E-14 | 4.49E-13 |
| CTSG         | <a href="#">113246003</a> | -76.3393821 | -6.25436 | 1.13E-07 | 1.03E-06 |
| MED12L       | <a href="#">113253630</a> | -77.2470156 | -6.27141 | 1.44E-15 | 5.4E-14  |
| KIF23        | <a href="#">113240920</a> | -80.8377638 | -6.33696 | 0        | 0        |
| CDK1         | <a href="#">113259076</a> | -81.6697533 | -6.35173 | 0        | 0        |
| LOC113249421 | <a href="#">113249421</a> | -84.5801539 | -6.40225 | 4.11E-15 | 1.42E-13 |
| DCK          | <a href="#">113263298</a> | -87.7729524 | -6.4557  | 0        | 0        |
| KEL          | <a href="#">113265440</a> | -90.3262792 | -6.49707 | 3.33E-16 | 1.39E-14 |
| LOC113256587 | <a href="#">113256587</a> | -92.2861371 | -6.52804 | 1.78E-15 | 6.58E-14 |
| CDC6         | <a href="#">113265490</a> | -92.836163  | -6.53661 | 0        | 0        |
| PCLAF        | <a href="#">113240850</a> | -96.1159031 | -6.5867  | 0        | 0        |
| LOC113260887 | <a href="#">113260887</a> | -96.6345464 | -6.59447 | 0        | 0        |
| MPO          | <a href="#">113268870</a> | -108.788735 | -6.76539 | 1.98E-08 | 2.06E-07 |
| KNL1         | <a href="#">113241920</a> | -110.769096 | -6.79141 | 0        | 0        |
| GATA1        | <a href="#">113265928</a> | -111.06222  | -6.79522 | 3.33E-16 | 1.39E-14 |
| ASPM         | <a href="#">113242590</a> | -114.63282  | -6.84088 | 0        | 0        |
| MKI67        | <a href="#">113252057</a> | -125.191925 | -6.968   | 0        | 0        |
| ADD2         | <a href="#">113244225</a> | -126.010222 | -6.9774  | 0        | 0        |
| MYBL2        | <a href="#">113258623</a> | -143.839543 | -7.16832 | 0        | 0        |
| SCD          | <a href="#">113251832</a> | -159.618051 | -7.31848 | 4.19E-14 | 1.24E-12 |

|              |                           |             |          |          |          |
|--------------|---------------------------|-------------|----------|----------|----------|
| CENPF        | <a href="#">113262693</a> | -160.983094 | -7.33077 | 0        | 0        |
| LOC113248289 | <a href="#">113248289</a> | -206.414349 | -7.6894  | 2.44E-15 | 8.78E-14 |
| HBA1         | <a href="#">113245361</a> | -215.444473 | -7.75117 | 5.22E-15 | 1.8E-13  |
| LOC113248288 | <a href="#">113248288</a> | -218.961435 | -7.77453 | 2E-15    | 7.28E-14 |
| ALAS2        | <a href="#">113248664</a> | -297.396922 | -8.21625 | 0        | 0        |
| KLF1         | <a href="#">113247208</a> | -350.80796  | -8.45454 | 0        | 0        |
| EPB42        | <a href="#">113241972</a> | -402.766637 | -8.6538  | 0        | 0        |
| HBM          | <a href="#">113245364</a> | -449.081581 | -8.81083 | 0        | 0        |
| SLC4A1       | <a href="#">113265358</a> | -588.358209 | -9.20055 | 0        | 0        |

---

**Table 2S.** Gene set enrichment for Gene Ontology biological processes, Reactome, KEGG, Hallmark and Biocarta gene sets in bone of black bears during hibernation as compared to summer active animals. NES – normalized enrichment score, positive values indicate elevated proportion of overexpressed genes and negative scores indicate excess of under expressed genes. FDR – false discovery rate with cutoff FDR < 0.05.

| Gene Set                          | #genes | NES   | FDR    |
|-----------------------------------|--------|-------|--------|
| Hallmark                          |        |       |        |
| KRAS SIGNALING DN                 | 97     | 2.27  | 0.003  |
| E2F TARGETS                       | 177    | -7.12 | <0.001 |
| G2M CHECKPOINT                    | 173    | -6.38 | <0.001 |
| ALLOGRAFT REJECTION               | 128    | -5.34 | <0.001 |
| INFLAMMATORY RESPONSE             | 148    | -4.23 | <0.001 |
| INTERFERON ALPHA RESPONSE         | 75     | -3.91 | <0.001 |
| COMPLEMENT                        | 157    | -3.87 | <0.001 |
| HEME METABOLISM                   | 163    | -3.81 | <0.001 |
| IL6 JAK STAT3 SIGNALING           | 67     | -3.49 | <0.001 |
| MTORC1 SIGNALING                  | 183    | -3.46 | <0.001 |
| EPITHELIAL MESENCHYMAL TRANSITION | 186    | -2.95 | <0.001 |
| KRAS SIGNALING UP                 | 158    | -2.94 | <0.001 |
| CHOLESTEROL HOMEOSTASIS           | 65     | -2.84 | <0.001 |
| XENOBIOTIC METABOLISM             | 136    | -2.52 | <0.001 |
| IL2 STAT5 SIGNALING               | 171    | -2.41 | <0.001 |
| MITOTIC SPINDLE                   | 185    | -2.38 | 0.001  |
| PROTEIN SECRETION                 | 90     | -2.27 | 0.002  |
| ESTROGEN RESPONSE LATE            | 152    | -2.13 | 0.004  |
| DNA REPAIR                        | 137    | -1.89 | 0.020  |
| ANGIOGENESIS                      | 31     | -1.86 | 0.022  |
| APICAL JUNCTION                   | 165    | -1.84 | 0.023  |
| PI3K AKT MTOR SIGNALING           | 94     | -1.78 | 0.030  |
| ANDROGEN RESPONSE                 | 89     | -1.74 | 0.035  |
| COAGULATION                       | 97     | -1.71 | 0.038  |
| UNFOLDED PROTEIN RESPONSE         | 101    | -1.66 | 0.047  |
| KEGG                              |        |       |        |

|                                             |     |       |        |
|---------------------------------------------|-----|-------|--------|
| PARKINSONS DISEASE                          | 78  | 6.43  | <0.001 |
| OXIDATIVE PHOSPHORYLATION                   | 76  | 6.20  | <0.001 |
| RIBOSOME                                    | 84  | 5.72  | <0.001 |
| ALZHEIMERS DISEASE                          | 116 | 5.09  | <0.001 |
| HUNTINGTONS DISEASE                         | 128 | 4.28  | <0.001 |
| CITRATE CYCLE TCA CYCLE                     | 27  | 3.27  | <0.001 |
| CARDIAC MUSCLE CONTRACTION                  | 27  | 3.18  | <0.001 |
| HYPERTROPHIC CARDIOMYOPATHY HCM             | 61  | 2.70  | <0.001 |
| PROTEASOME                                  | 40  | 2.55  | <0.001 |
| DILATED CARDIOMYOPATHY                      | 67  | 2.53  | <0.001 |
| CIRCADIAN RHYTHM MAMMAL                     | 12  | 2.08  | 0.018  |
| CELL CYCLE                                  | 109 | -4.16 | <0.001 |
| LYSOSOME                                    | 110 | -3.74 | <0.001 |
| SPLICEOSOME                                 | 118 | -3.72 | <0.001 |
| HEMATOPOIETIC CELL LINEAGE                  | 51  | -3.67 | <0.001 |
| PRIMARY IMMUNODEFICIENCY                    | 23  | -3.44 | <0.001 |
| N GLYCAN BIOSYNTHESIS                       | 42  | -3.12 | <0.001 |
| DNA REPLICATION                             | 35  | -3.11 | <0.001 |
| COMPLEMENT AND COAGULATION CASCADES         | 37  | -3.04 | <0.001 |
| PORPHYRIN AND CHLOROPHYLL METABOLISM        | 18  | -3.00 | <0.001 |
| P53 SIGNALING PATHWAY                       | 58  | -2.84 | <0.001 |
| LEUKOCYTE TRANSENDOTHELIAL MIGRATION        | 89  | -2.69 | <0.001 |
| CHEMOKINE SIGNALING PATHWAY                 | 128 | -2.59 | 0.001  |
| AMINO SUGAR AND NUCLEOTIDE SUGAR METABOLISM | 38  | -2.54 | 0.001  |
| ANTIGEN PROCESSING AND PRESENTATION         | 30  | -2.53 | 0.001  |
| JAK STAT SIGNALING PATHWAY                  | 95  | -2.53 | 0.001  |
| NATURAL KILLER CELL MEDIATED CYTOTOXICITY   | 73  | -2.47 | 0.001  |
| CYTOKINE CYTOKINE RECEPTOR INTERACTION      | 131 | -2.45 | 0.001  |
| FC GAMMA R MEDIATED PHAGOCYTOSIS            | 87  | -2.43 | 0.002  |
| SYSTEMIC LUPUS ERYTHEMATOSUS                | 23  | -2.38 | 0.002  |
| APOPTOSIS                                   | 69  | -2.36 | 0.002  |

|                                                                                                                  |     |       |        |
|------------------------------------------------------------------------------------------------------------------|-----|-------|--------|
| SPHINGOLIPID METABOLISM                                                                                          | 29  | -2.31 | 0.003  |
| PATHOGENIC ESCHERICHIA COLI INFECTION                                                                            | 40  | -2.30 | 0.003  |
| STEROID BIOSYNTHESIS                                                                                             | 14  | -2.26 | 0.004  |
| VIBRIO CHOLERAE INFECTION                                                                                        | 42  | -2.22 | 0.006  |
| ASTHMA                                                                                                           | 6   | -2.07 | 0.016  |
| GLYCOSAMINOGLYCAN DEGRADATION                                                                                    | 17  | -2.07 | 0.015  |
| GLYCEROLIPID METABOLISM                                                                                          | 39  | -2.03 | 0.018  |
| TOLL LIKE RECEPTOR SIGNALING PATHWAY                                                                             | 75  | -2.03 | 0.018  |
| FC EPSILON RI SIGNALING PATHWAY                                                                                  | 59  | -2.01 | 0.019  |
| OTHER GLYCAN DEGRADATION                                                                                         | 13  | -2.00 | 0.020  |
| BIOSYNTHESIS OF UNSATURATED FATTY ACIDS                                                                          | 18  | -1.95 | 0.026  |
| PENTOSE PHOSPHATE PATHWAY                                                                                        | 22  | -1.95 | 0.025  |
| SMALL CELL LUNG CANCER                                                                                           | 77  | -1.95 | 0.025  |
| ABC TRANSPORTERS                                                                                                 | 31  | -1.92 | 0.028  |
| GRAFT VERSUS HOST DISEASE                                                                                        | 5   | -1.92 | 0.029  |
| BASE EXCISION REPAIR                                                                                             | 32  | -1.91 | 0.028  |
| B CELL RECEPTOR SIGNALING PATHWAY                                                                                | 67  | -1.91 | 0.028  |
| LEISHMANIA INFECTION                                                                                             | 44  | -1.91 | 0.028  |
| CELL ADHESION MOLECULES CAMS                                                                                     | 81  | -1.85 | 0.039  |
| NEUROACTIVE LIGAND RECEPTOR INTERACTION                                                                          | 94  | -1.83 | 0.042  |
| ECM RECEPTOR INTERACTION                                                                                         | 73  | -1.81 | 0.046  |
| SULFUR METABOLISM                                                                                                | 6   | -1.79 | 0.049  |
| Reactome                                                                                                         |     |       |        |
| TRANSLATION                                                                                                      | 265 | 7.86  | <0.001 |
| THE CITRIC ACID TCA CYCLE AND RESPIRATORY ELECTRON TRANSPORT                                                     | 125 | 7.72  | <0.001 |
| RESPIRATORY ELECTRON TRANSPORT ATP SYNTHESIS BY CHEMIOSMOTIC COUPLING AND HEAT PRODUCTION BY UNCOUPLING PROTEINS | 82  | 7.26  | <0.001 |
| COMPLEX I BIOGENESIS                                                                                             | 49  | 6.08  | <0.001 |
| EUKARYOTIC TRANSLATION INITIATION                                                                                | 113 | 6.05  | <0.001 |
| MITOCHONDRIAL TRANSLATION                                                                                        | 93  | 5.97  | <0.001 |
| EUKARYOTIC TRANSLATION ELONGATION                                                                                | 89  | 5.83  | <0.001 |

|                                                                                                       |     |      |        |
|-------------------------------------------------------------------------------------------------------|-----|------|--------|
| RESPONSE OF EIF2AK4 GCN2 TO AMINO ACID DEFICIENCY                                                     | 95  | 5.63 | <0.001 |
| SRP DEPENDENT COTRANSLATIONAL PROTEIN TARGETING TO MEMBRANE                                           | 107 | 4.92 | <0.001 |
| REGULATION OF EXPRESSION OF SLITS AND ROBOS                                                           | 155 | 4.85 | <0.001 |
| MUSCLE CONTRACTION                                                                                    | 137 | 4.75 | <0.001 |
| SELENOAMINO ACID METABOLISM                                                                           | 101 | 4.74 | <0.001 |
| STRIATED MUSCLE CONTRACTION                                                                           | 27  | 4.65 | <0.001 |
| NONSENSE MEDIATED DECAY NMD                                                                           | 111 | 4.63 | <0.001 |
| ACTIVATION OF THE MRNA UPON BINDING OF THE CAP BINDING COMPLEX AND EIFS AND SUBSEQUENT BINDING TO 43S | 56  | 4.52 | <0.001 |
| SIGNALING BY ROBO RECEPTORS                                                                           | 196 | 4.21 | <0.001 |
| FORMATION OF ATP BY CHEMIOSMOTIC COUPLING                                                             | 16  | 4.18 | <0.001 |
| RRNA PROCESSING                                                                                       | 194 | 4.11 | <0.001 |
| CRISTAE FORMATION                                                                                     | 27  | 4.05 | <0.001 |
| METABOLISM OF AMINO ACIDS AND DERIVATIVES                                                             | 288 | 3.98 | <0.001 |
| PROTEIN LOCALIZATION                                                                                  | 136 | 3.96 | <0.001 |
| CITRIC ACID CYCLE TCA CYCLE                                                                           | 21  | 3.92 | <0.001 |
| METABOLISM OF RNA                                                                                     | 627 | 3.76 | <0.001 |
| CELLULAR RESPONSES TO EXTERNAL STIMULI                                                                | 456 | 3.71 | <0.001 |
| PYRUVATE METABOLISM AND CITRIC ACID TCA CYCLE                                                         | 47  | 3.68 | <0.001 |
| INFLUENZA INFECTION                                                                                   | 142 | 3.37 | <0.001 |
| CARDIAC CONDUCTION                                                                                    | 83  | 3.29 | <0.001 |
| PHASE 0 RAPID DEPOLARISATION                                                                          | 25  | 3.27 | <0.001 |
| NEDDYLATION                                                                                           | 211 | 3.26 | <0.001 |
| DECTIN 1 MEDIATED NONCANONICAL NF KB SIGNALING                                                        | 56  | 3.07 | <0.001 |
| MTORC1 MEDIATED SIGNALLING                                                                            | 23  | 2.93 | <0.001 |
| PINK PARKIN MEDIATED MITOPHAGY                                                                        | 20  | 2.82 | <0.001 |
| CELLULAR RESPONSE TO HYPOXIA                                                                          | 70  | 2.80 | <0.001 |
| AUTOPHAGY                                                                                             | 126 | 2.77 | <0.001 |
| REGULATION OF PTEN STABILITY AND ACTIVITY                                                             | 64  | 2.77 | <0.001 |

|                                                                |     |      |        |
|----------------------------------------------------------------|-----|------|--------|
| MTOR SIGNALLING                                                | 39  | 2.74 | <0.001 |
| ANTIGEN PROCESSING UBIQUITINATION<br>PROTEASOME DEGRADATION    | 274 | 2.73 | <0.001 |
| MYOCLONIC EPILEPSY OF LAFORA                                   | 8   | 2.70 | <0.001 |
| DEGRADATION OF AXIN                                            | 51  | 2.68 | <0.001 |
| CLEC7A DECTIN 1 SIGNALING                                      | 92  | 2.66 | <0.001 |
| ION HOMEOSTASIS                                                | 40  | 2.62 | 0.001  |
| SELECTIVE AUTOPHAGY                                            | 63  | 2.57 | 0.001  |
| NERVOUS SYSTEM DEVELOPMENT                                     | 479 | 2.56 | 0.001  |
| DEGRADATION OF DVL                                             | 52  | 2.54 | 0.001  |
| GLYOXYLATE METABOLISM AND GLYCINE<br>DEGRADATION               | 23  | 2.49 | 0.002  |
| DEGRADATION OF GLI1 BY THE PROTEASOME                          | 55  | 2.47 | 0.002  |
| PHASE 2 PLATEAU PHASE                                          | 15  | 2.43 | 0.003  |
| NEGATIVE REGULATION OF NOTCH4 SIGNALING                        | 51  | 2.42 | 0.003  |
| SIGNALING BY NOTCH4                                            | 77  | 2.40 | 0.003  |
| DEVELOPMENTAL BIOLOGY                                          | 709 | 2.38 | 0.004  |
| RRNA MODIFICATION IN THE NUCLEUS AND<br>CYTOSOL                | 58  | 2.37 | 0.004  |
| PTEN REGULATION                                                | 132 | 2.36 | 0.004  |
| BETA OXIDATION OF HEXANOYL COA TO BUTANOYL<br>COA              | 5   | 2.34 | 0.005  |
| BETA OXIDATION OF OCTANOYL COA TO HEXANOYL<br>COA              | 5   | 2.30 | 0.006  |
| DNA DAMAGE RECOGNITION IN GG NER                               | 37  | 2.28 | 0.007  |
| SIGNALING BY RETINOIC ACID                                     | 31  | 2.28 | 0.007  |
| REGULATION OF RUNX2 EXPRESSION AND ACTIVITY                    | 65  | 2.27 | 0.007  |
| NOTCH3 ACTIVATION AND TRANSMISSION OF<br>SIGNAL TO THE NUCLEUS | 23  | 2.25 | 0.008  |
| TCF DEPENDENT SIGNALING IN RESPONSE TO WNT                     | 146 | 2.25 | 0.008  |
| ENERGY DEPENDENT REGULATION OF MTOR BY<br>LKB1 AMPK            | 28  | 2.25 | 0.008  |
| ASYMMETRIC LOCALIZATION OF PCP PROTEINS                        | 60  | 2.24 | 0.008  |
| AUF1 HNRNP D0 BINDS AND DESTABILIZES MRNA                      | 50  | 2.23 | 0.009  |

|                                                            |     |      |       |
|------------------------------------------------------------|-----|------|-------|
| RRNA PROCESSING IN THE MITOCHONDRION                       | 9   | 2.20 | 0.010 |
| C TYPE LECTIN RECEPTORS CLRS                               | 109 | 2.20 | 0.011 |
| REGULATION OF PYRUVATE DEHYDROGENASE PDH COMPLEX           | 15  | 2.19 | 0.011 |
| DOWNSTREAM SIGNALING EVENTS OF B CELL RECEPTOR BCR         | 76  | 2.18 | 0.012 |
| PROCESSING OF SMDT1                                        | 16  | 2.18 | 0.012 |
| GLYCOGEN METABOLISM                                        | 25  | 2.17 | 0.012 |
| RUNX3 REGULATES YAP1 MEDIATED TRANSCRIPTION                | 7   | 2.09 | 0.019 |
| GLYCOGEN SYNTHESIS                                         | 14  | 2.09 | 0.019 |
| ION TRANSPORT BY P TYPE ATPASES                            | 40  | 2.08 | 0.019 |
| STABILIZATION OF P53                                       | 52  | 2.07 | 0.020 |
| HEDGEHOG ON STATE                                          | 78  | 2.07 | 0.020 |
| NEURONAL SYSTEM                                            | 228 | 2.06 | 0.020 |
| HEDGEHOG LIGAND BIOGENESIS                                 | 56  | 2.04 | 0.023 |
| RECYCLING OF EIF2 GDP                                      | 7   | 2.03 | 0.025 |
| GLUCONEOGENESIS                                            | 29  | 2.00 | 0.030 |
| BETA OXIDATION OF DECANOYL COA TO OCTANOYL COA COA         | 6   | 2.00 | 0.030 |
| FCERI MEDIATED NF KB ACTIVATION                            | 76  | 2.00 | 0.030 |
| RAS ACTIVATION UPON CA2 INFLUX THROUGH NMDA RECEPTOR       | 13  | 2.00 | 0.030 |
| BUDDING AND MATURATION OF HIV VIRION                       | 26  | 1.99 | 0.031 |
| CROSS PRESENTATION OF SOLUBLE EXOGENOUS ANTIGENS ENDOSOMES | 44  | 1.98 | 0.032 |
| RNA POLYMERASE III TRANSCRIPTION                           | 39  | 1.98 | 0.032 |
| DEGRADATION OF BETA CATENIN BY THE DESTRUCTION COMPLEX     | 78  | 1.97 | 0.034 |
| INTRACELLULAR SIGNALING BY SECOND MESSENGERS               | 261 | 1.97 | 0.034 |
| ABC TRANSPORTER DISORDERS                                  | 65  | 1.97 | 0.034 |
| RA BIOSYNTHESIS PATHWAY                                    | 11  | 1.96 | 0.035 |
| SIGNALING BY NOTCH1 HD DOMAIN MUTANTS IN CANCER            | 13  | 1.95 | 0.036 |

|                                                                          |     |       |        |
|--------------------------------------------------------------------------|-----|-------|--------|
| UNBLOCKING OF NMDA RECEPTORS GLUTAMATE BINDING AND ACTIVATION            | 11  | 1.95  | 0.037  |
| INTERACTION BETWEEN L1 AND ANKYRINS                                      | 18  | 1.95  | 0.037  |
| LATE ENDOSOMAL MICROAUTOPHAGY                                            | 28  | 1.94  | 0.038  |
| MAPK6 MAPK4 SIGNALING                                                    | 78  | 1.93  | 0.040  |
| RNA POLYMERASE III TRANSCRIPTION INITIATION FROM TYPE 3 PROMOTER         | 26  | 1.92  | 0.041  |
| RRNA MODIFICATION IN THE MITOCHONDRION                                   | 6   | 1.91  | 0.044  |
| INNATE IMMUNE SYSTEM                                                     | 762 | -6.96 | <0.001 |
| NEUTROPHIL DEGRANULATION                                                 | 374 | -6.68 | <0.001 |
| CELL CYCLE                                                               | 522 | -5.88 | <0.001 |
| CELL CYCLE MITOTIC                                                       | 429 | -5.34 | <0.001 |
| IMMUNOREGULATORY INTERACTIONS BETWEEN A LYMPHOID AND A NON LYMPHOID CELL | 57  | -5.23 | <0.001 |
| MITOTIC PROMETAPHASE                                                     | 162 | -4.55 | <0.001 |
| PROCESSING OF CAPPED INTRON CONTAINING PRE MRNA                          | 230 | -4.38 | <0.001 |
| HEMOSTASIS                                                               | 452 | -4.32 | <0.001 |
| SIGNALING BY RHO GTPASES                                                 | 326 | -4.09 | <0.001 |
| RESOLUTION OF SISTER CHROMATID COHESION                                  | 92  | -4.06 | <0.001 |
| RHO GTPASE EFFECTORS                                                     | 215 | -3.92 | <0.001 |
| CHROMOSOME MAINTENANCE                                                   | 64  | -3.82 | <0.001 |
| MRNA SPLICING                                                            | 184 | -3.70 | <0.001 |
| DNA REPAIR                                                               | 267 | -3.60 | <0.001 |
| RHO GTPASES ACTIVATE FORMINS                                             | 107 | -3.57 | <0.001 |
| DNA STRAND ELONGATION                                                    | 29  | -3.52 | <0.001 |
| DEPOSITION OF NEW CENPA CONTAINING NUCLEOSOMES AT THE CENTROMERE         | 22  | -3.50 | <0.001 |
| PLATELET ACTIVATION SIGNALING AND AGGREGATION                            | 211 | -3.48 | <0.001 |
| TRANSPORT OF MATURE TRANSCRIPT TO CYTOPLASM                              | 76  | -3.48 | <0.001 |
| G0 AND EARLY G1                                                          | 24  | -3.47 | <0.001 |
| SLC TRANSPORTER DISORDERS                                                | 60  | -3.46 | <0.001 |

|                                                                                      |     |       |        |
|--------------------------------------------------------------------------------------|-----|-------|--------|
| G1 S SPECIFIC TRANSCRIPTION                                                          | 24  | -3.38 | <0.001 |
| RESOLUTION OF D LOOP STRUCTURES                                                      | 31  | -3.38 | <0.001 |
| HDR THROUGH HOMOLOGOUS RECOMBINATION<br>HRR                                          | 63  | -3.35 | <0.001 |
| CELL CYCLE CHECKPOINTS                                                               | 222 | -3.33 | <0.001 |
| SLC MEDIATED TRANSMEMBRANE TRANSPORT                                                 | 147 | -3.32 | <0.001 |
| INTERACTIONS OF REV WITH HOST CELLULAR<br>PROTEINS                                   | 32  | -3.30 | <0.001 |
| TRANSCRIPTIONAL REGULATION OF<br>GRANULOPOIESIS                                      | 29  | -3.26 | <0.001 |
| RESOLUTION OF D LOOP STRUCTURES THROUGH<br>SYNTHESIS DEPENDENT STRAND ANNEALING SDSA | 25  | -3.23 | <0.001 |
| INTERFERON ALPHA BETA SIGNALING                                                      | 36  | -3.22 | <0.001 |
| ACTIVATION OF THE PRE REPLICATIVE COMPLEX                                            | 30  | -3.17 | <0.001 |
| ANTIMICROBIAL PEPTIDES                                                               | 21  | -3.16 | <0.001 |
| M PHASE                                                                              | 302 | -3.15 | <0.001 |
| AURKA ACTIVATION BY TPX2                                                             | 64  | -3.14 | <0.001 |
| BINDING AND UPTAKE OF LIGANDS BY SCAVENGER<br>RECEPTORS                              | 32  | -3.13 | <0.001 |
| NUCLEAR IMPORT OF REV PROTEIN                                                        | 29  | -3.13 | <0.001 |
| POLO LIKE KINASE MEDIATED EVENTS                                                     | 14  | -3.11 | <0.001 |
| DNA DOUBLE STRAND BREAK REPAIR                                                       | 124 | -3.08 | <0.001 |
| MITOTIC SPINDLE CHECKPOINT                                                           | 89  | -3.07 | <0.001 |
| SUMOYLATION OF DNA REPLICATION PROTEINS                                              | 40  | -3.05 | <0.001 |
| CYTOKINE SIGNALING IN IMMUNE SYSTEM                                                  | 597 | -3.03 | <0.001 |
| HOMOLOGOUS DNA PAIRING AND STRAND<br>EXCHANGE                                        | 41  | -3.01 | <0.001 |
| TRANSPORT OF THE SLBP DEPENDANT MATURE<br>MRNA                                       | 31  | -3.01 | <0.001 |
| POLYMERASE SWITCHING ON THE C STRAND OF<br>THE TELOMERE                              | 17  | -3.00 | <0.001 |
| MITOTIC G1 PHASE AND G1 S TRANSITION                                                 | 136 | -2.98 | <0.001 |
| CLASS A 1 RHODOPSIN LIKE RECEPTORS                                                   | 112 | -2.96 | <0.001 |
| LEISHMANIA INFECTION                                                                 | 155 | -2.96 | <0.001 |
| SUMOYLATION                                                                          | 158 | -2.96 | <0.001 |

|                                                                         |     |       |        |
|-------------------------------------------------------------------------|-----|-------|--------|
| IRAK4 DEFICIENCY TLR2 4                                                 | 10  | -2.93 | <0.001 |
| INTERFERON SIGNALING                                                    | 127 | -2.93 | <0.001 |
| TRANSCRIPTION OF E2F TARGETS UNDER<br>NEGATIVE CONTROL BY DREAM COMPLEX | 18  | -2.93 | <0.001 |
| TRANSPORT OF MATURE MRNAS DERIVED FROM<br>INTRONLESS TRANSCRIPTS        | 38  | -2.90 | <0.001 |
| CONDENSATION OF PROPHASE CHROMOSOMES                                    | 13  | -2.87 | <0.001 |
| EXPORT OF VIRAL RIBONUCLEOPROTEINS FROM<br>NUCLEUS                      | 27  | -2.87 | <0.001 |
| HYALURONAN UPTAKE AND DEGRADATION                                       | 12  | -2.87 | <0.001 |
| UNWINDING OF DNA                                                        | 9   | -2.86 | <0.001 |
| SIGNALING BY GPCR                                                       | 410 | -2.86 | <0.001 |
| SUMOYLATION OF UBIQUITINYLATION PROTEINS                                | 34  | -2.85 | <0.001 |
| REGULATION OF GLUCOKINASE BY GLUCOKINASE<br>REGULATORY PROTEIN          | 26  | -2.84 | <0.001 |
| GPCR LIGAND BINDING                                                     | 163 | -2.84 | <0.001 |
| TELOMERE C STRAND LAGGING STRAND<br>SYNTHESIS                           | 28  | -2.82 | <0.001 |
| CHROMATIN MODIFYING ENZYMES                                             | 196 | -2.82 | <0.001 |
| RNA POLYMERASE II TRANSCRIPTION TERMINATION                             | 65  | -2.79 | <0.001 |
| LAGGING STRAND SYNTHESIS                                                | 20  | -2.78 | <0.001 |
| INITIAL TRIGGERING OF COMPLEMENT                                        | 13  | -2.77 | <0.001 |
| TP53 REGULATES TRANSCRIPTION OF CELL CYCLE<br>GENES                     | 45  | -2.76 | <0.001 |
| PD 1 SIGNALING                                                          | 10  | -2.76 | <0.001 |
| ADAPTIVE IMMUNE SYSTEM                                                  | 577 | -2.76 | <0.001 |
| GENERATION OF SECOND MESSENGER MOLECULES                                | 20  | -2.76 | <0.001 |
| INTERLEUKIN 10 SIGNALING                                                | 24  | -2.75 | <0.001 |
| HOMOLOGY DIRECTED REPAIR                                                | 98  | -2.73 | <0.001 |
| COMPLEMENT CASCADE                                                      | 31  | -2.72 | <0.001 |
| POLYMERASE SWITCHING                                                    | 14  | -2.71 | <0.001 |
| ROS AND RNS PRODUCTION IN PHAGOCYTES                                    | 25  | -2.71 | <0.001 |
| PARASITE INFECTION                                                      | 56  | -2.71 | <0.001 |
| ASPARAGINE N LINKED GLYCOSYLATION                                       | 247 | -2.70 | <0.001 |

|                                                                                                                    |     |       |        |
|--------------------------------------------------------------------------------------------------------------------|-----|-------|--------|
| CELL SURFACE INTERACTIONS AT THE VASCULAR WALL                                                                     | 97  | -2.69 | <0.001 |
| SUMOYLATION OF SUMOYLATION PROTEINS                                                                                | 30  | -2.69 | <0.001 |
| TRANSCRIPTION OF E2F TARGETS UNDER NEGATIVE CONTROL BY P107 RBL1 AND P130 RBL2 IN COMPLEX WITH HDAC1               | 16  | -2.69 | <0.001 |
| SUMOYLATION OF DNA DAMAGE RESPONSE AND REPAIR PROTEINS                                                             | 70  | -2.68 | <0.001 |
| E2F MEDIATED REGULATION OF DNA REPLICATION                                                                         | 21  | -2.67 | <0.001 |
| NUCLEAR PORE COMPLEX NPC DISASSEMBLY                                                                               | 30  | -2.66 | <0.001 |
| ACTIVATION OF ATR IN RESPONSE TO REPLICATION STRESS                                                                | 33  | -2.66 | <0.001 |
| REGULATION OF TLR BY ENDOGENOUS LIGAND                                                                             | 11  | -2.66 | <0.001 |
| G2 M DNA DAMAGE CHECKPOINT                                                                                         | 58  | -2.65 | <0.001 |
| REGULATION OF PLK1 ACTIVITY AT G2 M TRANSITION                                                                     | 77  | -2.63 | <0.001 |
| INTERACTIONS OF VPR WITH HOST CELLULAR PROTEINS                                                                    | 32  | -2.63 | <0.001 |
| GPVI MEDIATED ACTIVATION CASCADE                                                                                   | 33  | -2.63 | <0.001 |
| PENTOSE PHOSPHATE PATHWAY                                                                                          | 13  | -2.62 | <0.001 |
| S PHASE                                                                                                            | 146 | -2.62 | <0.001 |
| TELOMERE MAINTENANCE                                                                                               | 43  | -2.61 | <0.001 |
| NS1 MEDIATED EFFECTS ON HOST PATHWAYS                                                                              | 34  | -2.61 | <0.001 |
| INTERLEUKIN 4 AND INTERLEUKIN 13 SIGNALING                                                                         | 78  | -2.58 | 0.001  |
| TRANSPORT OF SMALL MOLECULES                                                                                       | 487 | -2.57 | 0.001  |
| BIOSYNTHESIS OF THE N GLYCAN PRECURSOR DOLICHOL LIPID LINKED OLIGOSACCHARIDE LLO AND TRANSFER TO A NASCENT PROTEIN | 67  | -2.56 | 0.001  |
| TRANSPORT OF BILE SALTS AND ORGANIC ACIDS METAL IONS AND AMINE COMPOUNDS                                           | 39  | -2.55 | 0.001  |
| SIGNAL REGULATORY PROTEIN FAMILY INTERACTIONS                                                                      | 11  | -2.55 | 0.001  |
| RESPONSE TO ELEVATED PLATELET CYTOSOLIC CA2                                                                        | 103 | -2.55 | 0.001  |
| EXTENSION OF TELOMERES                                                                                             | 43  | -2.55 | 0.001  |
| METABOLISM OF PORPHYRINS                                                                                           | 19  | -2.54 | 0.001  |

|                                                                                  |     |       |       |
|----------------------------------------------------------------------------------|-----|-------|-------|
| TP53 REGULATES TRANSCRIPTION OF GENES INVOLVED IN G2 CELL CYCLE ARREST           | 17  | -2.54 | 0.001 |
| ANCHORING OF THE BASAL BODY TO THE PLASMA MEMBRANE                               | 88  | -2.54 | 0.001 |
| SPHINGOLIPID METABOLISM                                                          | 69  | -2.52 | 0.001 |
| SIGNALING BY INTERLEUKINS                                                        | 344 | -2.52 | 0.001 |
| REGULATION OF TP53 ACTIVITY THROUGH PHOSPHORYLATION                              | 86  | -2.49 | 0.001 |
| FCGAMMA RECEPTOR FCGR DEPENDENT PHAGOCYTOSIS                                     | 80  | -2.49 | 0.001 |
| POSTMITOTIC NUCLEAR PORE COMPLEX NPC REFORMATION                                 | 25  | -2.49 | 0.001 |
| METABOLISM OF CARBOHYDRATES                                                      | 241 | -2.49 | 0.001 |
| INTERFERON GAMMA SIGNALING                                                       | 50  | -2.48 | 0.001 |
| FCGR ACTIVATION                                                                  | 9   | -2.48 | 0.001 |
| METABOLISM OF LIPIDS                                                             | 554 | -2.48 | 0.001 |
| PHOSPHORYLATION OF EMI1                                                          | 6   | -2.48 | 0.001 |
| HYALURONAN METABOLISM                                                            | 16  | -2.47 | 0.001 |
| MEIOSIS                                                                          | 42  | -2.47 | 0.001 |
| ANTIGEN ACTIVATES B CELL RECEPTOR BCR LEADING TO GENERATION OF SECOND MESSENGERS | 28  | -2.45 | 0.001 |
| DAP12 INTERACTIONS                                                               | 25  | -2.44 | 0.001 |
| EPIGENETIC REGULATION OF GENE EXPRESSION                                         | 85  | -2.44 | 0.002 |
| INTEGRIN CELL SURFACE INTERACTIONS                                               | 73  | -2.41 | 0.002 |
| MITOTIC METAPHASE AND ANAPHASE                                                   | 192 | -2.41 | 0.002 |
| EXTRACELLULAR MATRIX ORGANIZATION                                                | 235 | -2.41 | 0.002 |
| TRANSFERRIN ENDOCYTOSIS AND RECYCLING                                            | 22  | -2.41 | 0.002 |
| REPRODUCTION                                                                     | 51  | -2.40 | 0.002 |
| CROSSLINKING OF COLLAGEN FIBRILS                                                 | 17  | -2.39 | 0.002 |
| RNA POLYMERASE II TRANSCRIBES SNRNA GENES                                        | 72  | -2.38 | 0.002 |
| CHK1 CHK2 CDS1 MEDIATED INACTIVATION OF CYCLIN B CDK1 COMPLEX                    | 11  | -2.38 | 0.002 |
| FACTORS INVOLVED IN MEGAKARYOCYTE DEVELOPMENT AND PLATELET PRODUCTION            | 108 | -2.37 | 0.002 |

|                                                                  |     |       |       |
|------------------------------------------------------------------|-----|-------|-------|
| NA CL DEPENDENT NEUROTRANSMITTER TRANSPORTERS                    | 5   | -2.36 | 0.003 |
| INHIBITION OF REPLICATION INITIATION OF DAMAGED DNA BY RB1 E2F1  | 12  | -2.36 | 0.003 |
| CASPASE ACTIVATION VIA DEATH RECEPTORS IN THE PRESENCE OF LIGAND | 11  | -2.35 | 0.003 |
| HEME BIOSYNTHESIS                                                | 12  | -2.35 | 0.003 |
| GLYCOSPHINGOLIPID METABOLISM                                     | 34  | -2.34 | 0.003 |
| DAP12 SIGNALING                                                  | 24  | -2.33 | 0.003 |
| SEPARATION OF SISTER CHROMATIDS                                  | 150 | -2.33 | 0.003 |
| RESOLUTION OF ABASIC SITES AP SITES                              | 38  | -2.33 | 0.003 |
| REGULATION OF TP53 ACTIVITY                                      | 149 | -2.32 | 0.003 |
| HIV INFECTION                                                    | 208 | -2.32 | 0.003 |
| NUCLEAR ENVELOPE BREAKDOWN                                       | 47  | -2.32 | 0.003 |
| RECRUITMENT OF NUMA TO MITOTIC CENTROSOMES                       | 75  | -2.32 | 0.003 |
| RECRUITMENT OF MITOTIC CENTROSOME PROTEINS AND COMPLEXES         | 69  | -2.32 | 0.003 |
| INTERLEUKIN 2 SIGNALING                                          | 8   | -2.31 | 0.003 |
| TRANS GOLGI NETWORK VESICLE BUDDING                              | 67  | -2.31 | 0.003 |
| MITOTIC TELOPHASE CYTOKINESIS                                    | 13  | -2.30 | 0.004 |
| CHOLESTEROL BIOSYNTHESIS                                         | 22  | -2.29 | 0.004 |
| RNA POLYMERASE II TRANSCRIPTION                                  | 967 | -2.27 | 0.004 |
| DISEASES ASSOCIATED WITH N GLYCOSYLATION OF PROTEINS             | 16  | -2.27 | 0.004 |
| PROCESSIVE SYNTHESIS ON THE LAGGING STRAND                       | 15  | -2.26 | 0.005 |
| BASE EXCISION REPAIR                                             | 44  | -2.25 | 0.005 |
| TRAFFICKING AND PROCESSING OF ENDOSOMAL TLR                      | 12  | -2.24 | 0.005 |
| TRANSCRIPTIONAL REGULATION BY TP53                               | 305 | -2.24 | 0.005 |
| TRANSCRIPTIONAL REGULATION BY SMALL RNAS                         | 41  | -2.23 | 0.006 |
| MITOTIC G2 G2 M PHASES                                           | 170 | -2.23 | 0.006 |
| HIV LIFE CYCLE                                                   | 135 | -2.23 | 0.006 |
| SCAVENGING BY CLASS A RECEPTORS                                  | 17  | -2.22 | 0.006 |

|                                                                              |     |       |       |
|------------------------------------------------------------------------------|-----|-------|-------|
| THE ROLE OF NEF IN HIV 1 REPLICATION AND DISEASE PATHOGENESIS                | 23  | -2.21 | 0.007 |
| HCMV EARLY EVENTS                                                            | 57  | -2.21 | 0.007 |
| HDR THROUGH SINGLE STRAND ANNEALING SSA                                      | 36  | -2.21 | 0.007 |
| DNA REPLICATION                                                              | 113 | -2.20 | 0.007 |
| FATTY ACYL COA BIOSYNTHESIS                                                  | 29  | -2.20 | 0.007 |
| MEIOTIC RECOMBINATION                                                        | 20  | -2.18 | 0.008 |
| SYNTHESIS OF 5 EICOSATETRAENOIC ACIDS                                        | 6   | -2.18 | 0.008 |
| CASPASE ACTIVATION VIA EXTRINSIC APOPTOTIC SIGNALLING PATHWAY                | 20  | -2.17 | 0.008 |
| G ALPHA I SIGNALLING EVENTS                                                  | 198 | -2.17 | 0.008 |
| ANTI INFLAMMATORY RESPONSE FAVOURING LEISHMANIA PARASITE INFECTION           | 82  | -2.17 | 0.008 |
| HATS ACETYLATE HISTONES                                                      | 77  | -2.17 | 0.008 |
| TRIF MEDIATED PROGRAMMED CELL DEATH                                          | 8   | -2.17 | 0.008 |
| RHO GTPASE CYCLE                                                             | 121 | -2.16 | 0.009 |
| PROSTANOID LIGAND RECEPTORS                                                  | 7   | -2.15 | 0.009 |
| EPHB MEDIATED FORWARD SIGNALING                                              | 36  | -2.15 | 0.010 |
| INTERLEUKIN 12 FAMILY SIGNALING                                              | 46  | -2.14 | 0.010 |
| CYCLIN A B1 B2 ASSOCIATED EVENTS DURING G2 M TRANSITION                      | 21  | -2.14 | 0.010 |
| G2 M CHECKPOINTS                                                             | 123 | -2.14 | 0.010 |
| METAL ION SLC TRANSPORTERS                                                   | 20  | -2.14 | 0.010 |
| SUMOYLATION OF CHROMATIN ORGANIZATION PROTEINS                               | 52  | -2.14 | 0.010 |
| PCNA DEPENDENT LONG PATCH BASE EXCISION REPAIR                               | 21  | -2.14 | 0.010 |
| RESOLUTION OF AP SITES VIA THE MULTIPLE NUCLEOTIDE PATCH REPLACEMENT PATHWAY | 25  | -2.13 | 0.010 |
| DEGRADATION OF THE EXTRACELLULAR MATRIX                                      | 100 | -2.13 | 0.010 |
| PROCESSING OF INTRONLESS PRE MRNAS                                           | 19  | -2.13 | 0.011 |
| TRANSCRIPTIONAL REGULATION BY E2F6                                           | 31  | -2.12 | 0.011 |
| CONDENSATION OF PROMETAPHASE CHROMOSOMES                                     | 9   | -2.11 | 0.012 |
| PLATELET AGGREGATION PLUG FORMATION                                          | 30  | -2.10 | 0.012 |

|                                                                             |     |       |       |
|-----------------------------------------------------------------------------|-----|-------|-------|
| VESICLE MEDIATED TRANSPORT                                                  | 574 | -2.10 | 0.012 |
| SUMOYLATION OF RNA BINDING PROTEINS                                         | 42  | -2.10 | 0.012 |
| PROGRESSIVE SYNTHESIS ON THE C STRAND OF THE<br>TELOMERE                    | 13  | -2.09 | 0.013 |
| COLLAGEN FORMATION                                                          | 72  | -2.08 | 0.013 |
| STING MEDIATED INDUCTION OF HOST IMMUNE<br>RESPONSES                        | 12  | -2.07 | 0.014 |
| PROCESSING OF DNA DOUBLE STRAND BREAK<br>ENDS                               | 60  | -2.07 | 0.015 |
| SNRNP ASSEMBLY                                                              | 47  | -2.06 | 0.015 |
| FANCONI ANEMIA PATHWAY                                                      | 32  | -2.06 | 0.015 |
| REGULATION OF RUNX1 EXPRESSION AND ACTIVITY                                 | 16  | -2.06 | 0.016 |
| DISEASES OF IMMUNE SYSTEM                                                   | 22  | -2.06 | 0.015 |
| CHEMOKINE RECEPTORS BIND CHEMOKINES                                         | 19  | -2.05 | 0.016 |
| RECYCLING PATHWAY OF L1                                                     | 32  | -2.04 | 0.016 |
| GOLGI ASSOCIATED VESICLE BIOGENESIS                                         | 53  | -2.04 | 0.016 |
| INTERLEUKIN 2 FAMILY SIGNALING                                              | 32  | -2.04 | 0.017 |
| GENE SILENCING BY RNA                                                       | 58  | -2.04 | 0.016 |
| MITOTIC PROPHASE                                                            | 75  | -2.04 | 0.017 |
| PROCESSING OF CAPPED INTRONLESS PRE MRNA                                    | 28  | -2.04 | 0.017 |
| DNA REPLICATION INITIATION                                                  | 8   | -2.03 | 0.017 |
| PLASMA LIPOPROTEIN CLEARANCE                                                | 27  | -2.03 | 0.018 |
| COLLAGEN BIOSYNTHESIS AND MODIFYING<br>ENZYMES                              | 56  | -2.02 | 0.018 |
| PHOSPHOLIPID METABOLISM                                                     | 170 | -2.02 | 0.018 |
| O LINKED GLYCOSYLATION OF MUCINS                                            | 33  | -2.01 | 0.019 |
| ACTIVATION OF NOXA AND TRANSLOCATION TO<br>MITOCHONDRIA                     | 5   | -2.01 | 0.019 |
| EARLY PHASE OF HIV LIFE CYCLE                                               | 13  | -2.01 | 0.019 |
| VIRAL MESSENGER RNA SYNTHESIS                                               | 38  | -2.00 | 0.020 |
| NF KB ACTIVATION THROUGH FADD RIP 1 PATHWAY<br>MEDIATED BY CASPASE 8 AND 10 | 12  | -1.99 | 0.022 |
| ESTABLISHMENT OF SISTER CHROMATID COHESION                                  | 10  | -1.98 | 0.023 |
| METABOLISM OF NUCLEOTIDES                                                   | 82  | -1.98 | 0.022 |

|                                                                                                                         |    |       |       |
|-------------------------------------------------------------------------------------------------------------------------|----|-------|-------|
| DECTIN 2 FAMILY                                                                                                         | 5  | -1.98 | 0.023 |
| CREATION OF C4 AND C2 ACTIVATORS                                                                                        | 8  | -1.98 | 0.023 |
| EICOSANOID LIGAND BINDING RECEPTORS                                                                                     | 11 | -1.97 | 0.023 |
| IRON UPTAKE AND TRANSPORT                                                                                               | 45 | -1.97 | 0.024 |
| PI METABOLISM                                                                                                           | 77 | -1.97 | 0.024 |
| ANTIGEN PRESENTATION FOLDING ASSEMBLY AND PEPTIDE LOADING OF CLASS I MHC                                                | 19 | -1.96 | 0.024 |
| PEPTIDE LIGAND BINDING RECEPTORS                                                                                        | 60 | -1.96 | 0.025 |
| CYCLIN D ASSOCIATED EVENTS IN G1                                                                                        | 39 | -1.95 | 0.026 |
| REGULATION OF INSULIN LIKE GROWTH FACTOR IGF TRANSPORT AND UPTAKE BY INSULIN LIKE GROWTH FACTOR BINDING PROTEINS IGFBPS | 79 | -1.92 | 0.031 |
| INTEGRIN SIGNALING                                                                                                      | 24 | -1.92 | 0.031 |
| NEF MEDIATES DOWN MODULATION OF CELL SURFACE RECEPTORS BY RECRUITING THEM TO CLATHRIN ADAPTERS                          | 16 | -1.92 | 0.032 |
| SYNTHESIS OF SUBSTRATES IN N GLYCAN BIOSYTHESIS                                                                         | 54 | -1.91 | 0.032 |
| ATTACHMENT OF GPI ANCHOR TO UPAR                                                                                        | 7  | -1.91 | 0.033 |
| G ALPHA S SIGNALLING EVENTS                                                                                             | 77 | -1.91 | 0.033 |
| COHESIN LOADING ONTO CHROMATIN                                                                                          | 10 | -1.91 | 0.033 |
| INSULIN RECEPTOR RECYCLING                                                                                              | 18 | -1.90 | 0.033 |
| ASSEMBLY OF COLLAGEN FIBRILS AND OTHER MULTIMERIC STRUCTURES                                                            | 49 | -1.90 | 0.034 |
| RUNX3 REGULATES IMMUNE RESPONSE AND CELL MIGRATION                                                                      | 6  | -1.90 | 0.034 |
| POSITIVE EPIGENETIC REGULATION OF RRNA EXPRESSION                                                                       | 45 | -1.90 | 0.034 |
| FCERI MEDIATED CA 2 MOBILIZATION                                                                                        | 27 | -1.90 | 0.034 |
| G ALPHA 12 13 SIGNALLING EVENTS                                                                                         | 63 | -1.89 | 0.035 |
| TERMINATION OF TRANSLESION DNA SYNTHESIS                                                                                | 30 | -1.89 | 0.035 |
| INTERLEUKIN 12 SIGNALING                                                                                                | 38 | -1.89 | 0.036 |
| INTERLEUKIN 3 INTERLEUKIN 5 AND GM CSF SIGNALING                                                                        | 39 | -1.89 | 0.036 |
| RHO GTPASES ACTIVATE NADPH OXIDASES                                                                                     | 19 | -1.89 | 0.036 |

|                                                                                                                  |     |       |       |
|------------------------------------------------------------------------------------------------------------------|-----|-------|-------|
| ECM PROTEOGLYCANS                                                                                                | 64  | -1.88 | 0.036 |
| DUAL INCISION IN TC NER                                                                                          | 60  | -1.88 | 0.037 |
| NEGATIVE EPIGENETIC REGULATION OF RRNA EXPRESSION                                                                | 47  | -1.88 | 0.037 |
| TRANSCRIPTION OF THE HIV GENOME                                                                                  | 64  | -1.88 | 0.037 |
| SYNTHESIS OF LIPOXINS LX                                                                                         | 5   | -1.87 | 0.037 |
| TP53 REGULATES TRANSCRIPTION OF ADDITIONAL CELL CYCLE GENES WHOSE EXACT ROLE IN THE P53 PATHWAY REMAIN UNCERTAIN | 20  | -1.87 | 0.038 |
| METABOLISM OF STEROIDS                                                                                           | 101 | -1.87 | 0.038 |
| RUNX1 REGULATES TRANSCRIPTION OF GENES INVOLVED IN DIFFERENTIATION OF MYELOID CELLS                              | 6   | -1.87 | 0.039 |
| HCMV INFECTION                                                                                                   | 80  | -1.86 | 0.039 |
| ROLE OF LAT2 NTAL LAB ON CALCIUM MOBILIZATION                                                                    | 15  | -1.86 | 0.039 |
| TP53 REGULATES TRANSCRIPTION OF GENES INVOLVED IN G1 CELL CYCLE ARREST                                           | 11  | -1.86 | 0.039 |
| SHC RELATED EVENTS TRIGGERED BY IGF1R                                                                            | 8   | -1.86 | 0.039 |
| BASE EXCISION REPAIR AP SITE FORMATION                                                                           | 16  | -1.85 | 0.041 |
| P130CAS LINKAGE TO MAPK SIGNALING FOR INTEGRINS                                                                  | 12  | -1.85 | 0.041 |
| OTHER INTERLEUKIN SIGNALING                                                                                      | 18  | -1.84 | 0.043 |
| DNA DAMAGE TELOMERE STRESS INDUCED SENESENCE                                                                     | 24  | -1.83 | 0.045 |
| ACTIVATION OF GENE EXPRESSION BY SREBF SREBP                                                                     | 40  | -1.83 | 0.047 |
| MEMBRANE TRAFFICKING                                                                                             | 544 | -1.83 | 0.046 |
| FCGR3A MEDIATED IL10 SYNTHESIS                                                                                   | 30  | -1.82 | 0.047 |
| NEF MEDIATED DOWNREGULATION OF MHC CLASS I COMPLEX CELL SURFACE EXPRESSION                                       | 7   | -1.82 | 0.047 |
| ACYL CHAIN REMODELLING OF PI                                                                                     | 5   | -1.82 | 0.047 |
| METABOLISM OF ANGIOTENSINOGEN TO ANGIOTENSINS                                                                    | 10  | -1.82 | 0.047 |
| E2F ENABLED INHIBITION OF PRE REPLICATION COMPLEX FORMATION                                                      | 9   | -1.81 | 0.050 |
| REGULATION OF CHOLESTEROL BIOSYNTHESIS BY SREBP SREBF                                                            | 53  | -1.81 | 0.050 |

## Biocarta

|                      |    |       |        |
|----------------------|----|-------|--------|
| AHSP PATHWAY         | 10 | -3.10 | <0.001 |
| BARD1 PATHWAY        | 8  | -3.07 | <0.001 |
| THELPER PATHWAY      | 11 | -2.98 | <0.001 |
| CELLCYCLE PATHWAY    | 20 | -2.94 | <0.001 |
| RB PATHWAY           | 11 | -2.93 | <0.001 |
| G2 PATHWAY           | 22 | -2.88 | <0.001 |
| STATHMIN PATHWAY     | 18 | -2.86 | <0.001 |
| CSK PATHWAY          | 13 | -2.83 | <0.001 |
| TCRA PATHWAY         | 8  | -2.81 | <0.001 |
| CTL PATHWAY          | 9  | -2.80 | <0.001 |
| DC PATHWAY           | 9  | -2.78 | <0.001 |
| NO2IL12 PATHWAY      | 10 | -2.78 | <0.001 |
| TCYTOTOXIC PATHWAY   | 10 | -2.78 | <0.001 |
| COMP PATHWAY         | 13 | -2.69 | <0.001 |
| CLASSIC PATHWAY      | 9  | -2.69 | <0.001 |
| LAIR PATHWAY         | 10 | -2.69 | <0.001 |
| TCAPOPTOSIS PATHWAY  | 6  | -2.66 | <0.001 |
| MCM PATHWAY          | 16 | -2.64 | <0.001 |
| ATRBCCA PATHWAY      | 22 | -2.54 | 0.001  |
| CDC25 PATHWAY        | 7  | -2.49 | 0.001  |
| MONOCYTE PATHWAY     | 10 | -2.38 | 0.003  |
| IL12 PATHWAY         | 14 | -2.37 | 0.003  |
| GRANULOCYTES PATHWAY | 9  | -2.32 | 0.004  |
| G1 PATHWAY           | 25 | -2.26 | 0.007  |
| RANMS PATHWAY        | 10 | -2.26 | 0.007  |
| IL17 PATHWAY         | 9  | -2.14 | 0.015  |
| CHEMICAL PATHWAY     | 17 | -2.11 | 0.019  |
| EFP PATHWAY          | 15 | -2.09 | 0.019  |
| EICOSANOID PATHWAY   | 18 | -2.06 | 0.022  |
| NEUTROPHIL PATHWAY   | 7  | -2.06 | 0.022  |
| MHC PATHWAY          | 8  | -2.05 | 0.022  |

|                     |    |       |       |
|---------------------|----|-------|-------|
| PLK3 PATHWAY        | 7  | -2.05 | 0.021 |
| SODD PATHWAY        | 7  | -2.03 | 0.023 |
| HIVNEF PATHWAY      | 50 | -2.03 | 0.022 |
| ERAD PATHWAY        | 18 | -2.02 | 0.023 |
| SRCRPTP PATHWAY     | 10 | -1.99 | 0.027 |
| P53 PATHWAY         | 15 | -1.97 | 0.029 |
| LYMPHOCYTE PATHWAY  | 8  | -1.96 | 0.030 |
| FAS PATHWAY         | 29 | -1.95 | 0.032 |
| BLYMPHOCYTE PATHWAY | 7  | -1.94 | 0.033 |
| PML PATHWAY         | 12 | -1.94 | 0.032 |
| NKCELLS PATHWAY     | 15 | -1.93 | 0.033 |
| ALTERNATIVE PATHWAY | 6  | -1.88 | 0.043 |
| DNAFRAGMENT PATHWAY | 9  | -1.87 | 0.043 |
| IL7 PATHWAY         | 15 | -1.86 | 0.046 |
| NPC PATHWAY         | 10 | -1.85 | 0.049 |
| TERT PATHWAY        | 6  | -1.84 | 0.049 |
| IL2RB PATHWAY       | 32 | -1.84 | 0.048 |
| INTRINSIC PATHWAY   | 13 | -1.83 | 0.050 |

Gene Ontology

|                                                     |     |      |        |
|-----------------------------------------------------|-----|------|--------|
| CELLULAR RESPIRATION                                | 137 | 6.39 | <0.001 |
| OXIDATIVE PHOSPHORYLATION                           | 93  | 6.37 | <0.001 |
| MUSCLE SYSTEM PROCESS                               | 321 | 6.07 | <0.001 |
| PEPTIDE BIOSYNTHETIC PROCESS                        | 551 | 6.06 | <0.001 |
| RESPIRATORY ELECTRON TRANSPORT CHAIN                | 74  | 6.05 | <0.001 |
| ENERGY DERIVATION BY OXIDATION OF ORGANIC COMPOUNDS | 210 | 5.99 | <0.001 |
| MUSCLE CONTRACTION                                  | 247 | 5.98 | <0.001 |
| ATP SYNTHESIS COUPLED ELECTRON TRANSPORT            | 56  | 5.96 | <0.001 |
| MITOCHONDRIAL TRANSLATIONAL TERMINATION             | 88  | 5.90 | <0.001 |
| NADH DEHYDROGENASE COMPLEX ASSEMBLY                 | 56  | 5.88 | <0.001 |
| TRANSLATIONAL TERMINATION                           | 101 | 5.70 | <0.001 |
| TRANSLATIONAL ELONGATION                            | 127 | 5.56 | <0.001 |

|                                                                |     |      |        |
|----------------------------------------------------------------|-----|------|--------|
| PEPTIDE METABOLIC PROCESS                                      | 653 | 5.54 | <0.001 |
| MUSCLE CELL DEVELOPMENT                                        | 140 | 5.22 | <0.001 |
| MYOFIBRIL ASSEMBLY                                             | 53  | 5.20 | <0.001 |
| STRIATED MUSCLE CONTRACTION                                    | 120 | 5.14 | <0.001 |
| TRANSLATIONAL INITIATION                                       | 174 | 5.10 | <0.001 |
| AMIDE BIOSYNTHETIC PROCESS                                     | 658 | 5.06 | <0.001 |
| GENERATION OF PRECURSOR METABOLITES AND ENERGY                 | 404 | 4.91 | <0.001 |
| COTRANSLATIONAL PROTEIN TARGETING TO MEMBRANE                  | 96  | 4.85 | <0.001 |
| ELECTRON TRANSPORT CHAIN                                       | 121 | 4.70 | <0.001 |
| SARCOMERE ORGANIZATION                                         | 34  | 4.63 | <0.001 |
| MITOCHONDRION ORGANIZATION                                     | 447 | 4.62 | <0.001 |
| MUSCLE FILAMENT SLIDING                                        | 26  | 4.62 | <0.001 |
| PROTEIN LOCALIZATION TO ENDOPLASMIC RETICULUM                  | 129 | 4.60 | <0.001 |
| ESTABLISHMENT OF PROTEIN LOCALIZATION TO ENDOPLASMIC RETICULUM | 108 | 4.59 | <0.001 |
| ACTIN MEDIATED CELL CONTRACTION                                | 84  | 4.58 | <0.001 |
| RNA PROCESSING                                                 | 822 | 4.55 | <0.001 |
| CELLULAR AMIDE METABOLIC PROCESS                               | 844 | 4.49 | <0.001 |
| ATP METABOLIC PROCESS                                          | 217 | 4.45 | <0.001 |
| SKELETAL MUSCLE CONTRACTION                                    | 31  | 4.43 | <0.001 |
| MUSCLE STRUCTURE DEVELOPMENT                                   | 510 | 4.35 | <0.001 |
| RIBOSOME BIOGENESIS                                            | 276 | 4.26 | <0.001 |
| RIBONUCLEOPROTEIN COMPLEX BIOGENESIS                           | 396 | 4.24 | <0.001 |
| STRIATED MUSCLE CELL DIFFERENTIATION                           | 214 | 4.24 | <0.001 |
| HEART PROCESS                                                  | 190 | 4.24 | <0.001 |
| MUSCLE CELL DIFFERENTIATION                                    | 284 | 4.15 | <0.001 |
| ACTIN FILAMENT BASED MOVEMENT                                  | 104 | 4.11 | <0.001 |
| CYTOPLASMIC TRANSLATION                                        | 85  | 4.08 | <0.001 |
| CELLULAR COMPONENT ASSEMBLY INVOLVED IN MORPHOGENESIS          | 85  | 4.08 | <0.001 |
| OXIDATION REDUCTION PROCESS                                    | 706 | 4.08 | <0.001 |

|                                                                       |     |      |        |
|-----------------------------------------------------------------------|-----|------|--------|
| NUCLEAR TRANSCRIBED MRNA CATABOLIC<br>PROCESS NONSENSE MEDIATED DECAY | 117 | 4.06 | <0.001 |
| NCRNA METABOLIC PROCESS                                               | 400 | 3.98 | <0.001 |
| PROTEIN TARGETING                                                     | 375 | 3.98 | <0.001 |
| CRISTAE FORMATION                                                     | 30  | 3.95 | <0.001 |
| NCRNA PROCESSING                                                      | 345 | 3.92 | <0.001 |
| ATP SYNTHESIS COUPLED PROTON TRANSPORT                                | 19  | 3.85 | <0.001 |
| CELLULAR PROTEIN COMPLEX DISASSEMBLY                                  | 190 | 3.85 | <0.001 |
| MULTICELLULAR ORGANISMAL MOVEMENT                                     | 42  | 3.75 | <0.001 |
| CARDIAC MUSCLE CONTRACTION                                            | 94  | 3.74 | <0.001 |
| CIRCULATORY SYSTEM PROCESS                                            | 358 | 3.72 | <0.001 |
| MUSCLE ORGAN DEVELOPMENT                                              | 308 | 3.71 | <0.001 |
| MRNA METABOLIC PROCESS                                                | 747 | 3.70 | <0.001 |
| ACTOMYOSIN STRUCTURE ORGANIZATION                                     | 163 | 3.64 | <0.001 |
| RRNA METABOLIC PROCESS                                                | 209 | 3.63 | <0.001 |
| MUSCLE FIBER DEVELOPMENT                                              | 53  | 3.61 | <0.001 |
| MUSCLE TISSUE DEVELOPMENT                                             | 308 | 3.57 | <0.001 |
| REGULATION OF BLOOD CIRCULATION                                       | 180 | 3.56 | <0.001 |
| MULTICELLULAR ORGANISMAL SIGNALING                                    | 121 | 3.56 | <0.001 |
| ESTABLISHMENT OF PROTEIN LOCALIZATION TO<br>MEMBRANE                  | 283 | 3.53 | <0.001 |
| REGULATION OF SYSTEM PROCESS                                          | 368 | 3.45 | <0.001 |
| CARDIAC CONDUCTION                                                    | 92  | 3.42 | <0.001 |
| REGULATION OF MUSCLE SYSTEM PROCESS                                   | 170 | 3.40 | <0.001 |
| MONOVALENT INORGANIC CATION TRANSPORT                                 | 287 | 3.38 | <0.001 |
| ION TRANSMEMBRANE TRANSPORT                                           | 686 | 3.37 | <0.001 |
| REGULATION OF HEART RATE                                              | 64  | 3.37 | <0.001 |
| CATION TRANSMEMBRANE TRANSPORT                                        | 511 | 3.36 | <0.001 |
| MEMBRANE DEPOLARIZATION DURING ACTION<br>POTENTIAL                    | 24  | 3.32 | <0.001 |
| SKELETAL MUSCLE ADAPTATION                                            | 20  | 3.31 | <0.001 |
| SKELETAL MUSCLE ORGAN DEVELOPMENT                                     | 129 | 3.29 | <0.001 |
| CATION TRANSPORT                                                      | 691 | 3.27 | <0.001 |

|                                                                     |     |      |        |
|---------------------------------------------------------------------|-----|------|--------|
| REGULATION OF ION TRANSMEMBRANE TRANSPORT                           | 278 | 3.26 | <0.001 |
| PROTEIN TARGETING TO MEMBRANE                                       | 173 | 3.26 | <0.001 |
| CARDIAC MUSCLE CELL ACTION POTENTIAL                                | 49  | 3.26 | <0.001 |
| REGULATION OF ION TRANSPORT                                         | 402 | 3.24 | <0.001 |
| SKELETAL MUSCLE THIN FILAMENT ASSEMBLY                              | 7   | 3.20 | <0.001 |
| REGULATION OF STRIATED MUSCLE CONTRACTION                           | 64  | 3.18 | <0.001 |
| SKELETAL MYOFIBRIL ASSEMBLY                                         | 9   | 3.16 | <0.001 |
| SARCOPLASMIC RETICULUM CALCIUM ION TRANSPORT                        | 28  | 3.14 | <0.001 |
| REGULATION OF CATION CHANNEL ACTIVITY                               | 94  | 3.12 | <0.001 |
| CARDIAC MYOFIBRIL ASSEMBLY                                          | 19  | 3.11 | <0.001 |
| INORGANIC ION TRANSMEMBRANE TRANSPORT                               | 493 | 3.10 | <0.001 |
| REGULATION OF MUSCLE CONTRACTION                                    | 111 | 3.10 | <0.001 |
| ESTABLISHMENT OF PROTEIN LOCALIZATION TO ORGANELLE                  | 482 | 3.07 | <0.001 |
| REGULATION OF MEMBRANE POTENTIAL                                    | 252 | 3.07 | <0.001 |
| PROTEIN CONTAINING COMPLEX DISASSEMBLY                              | 284 | 3.05 | <0.001 |
| ACTIN FILAMENT BASED PROCESS                                        | 618 | 3.04 | <0.001 |
| REGULATION OF TRANSMEMBRANE TRANSPORT                               | 343 | 3.04 | <0.001 |
| CARDIAC MUSCLE CELL CONTRACTION                                     | 50  | 3.04 | <0.001 |
| PROTEIN LOCALIZATION TO MEMBRANE                                    | 519 | 3.02 | <0.001 |
| ATP BIOSYNTHETIC PROCESS                                            | 38  | 2.99 | <0.001 |
| ACTION POTENTIAL                                                    | 84  | 2.98 | <0.001 |
| STRIATED MUSCLE MYOSIN THICK FILAMENT ASSEMBLY                      | 6   | 2.97 | <0.001 |
| MODIFICATION DEPENDENT MACROMOLECULE CATABOLIC PROCESS              | 552 | 2.95 | <0.001 |
| PROTEIN IMPORT INTO MITOCHONDRIAL MATRIX                            | 16  | 2.93 | <0.001 |
| MEMBRANE DEPolarIZATION DURING CARDIAC MUSCLE CELL ACTION POTENTIAL | 17  | 2.92 | <0.001 |
| NUCLEAR TRANSCRIBED MRNA CATABOLIC PROCESS                          | 197 | 2.91 | <0.001 |
| CARDIAC CELL DEVELOPMENT                                            | 66  | 2.90 | <0.001 |

|                                                                          |     |      |        |
|--------------------------------------------------------------------------|-----|------|--------|
| REGULATION OF TRANSPORTER ACTIVITY                                       | 170 | 2.87 | <0.001 |
| REGULATION OF CALCIUM ION TRANSMEMBRANE TRANSPORTER ACTIVITY             | 62  | 2.87 | <0.001 |
| RIBOSOMAL SMALL SUBUNIT BIOGENESIS                                       | 64  | 2.85 | <0.001 |
| REGULATION OF CATION TRANSMEMBRANE TRANSPORT                             | 210 | 2.84 | <0.001 |
| RIBOSOME ASSEMBLY                                                        | 55  | 2.80 | <0.001 |
| STRIATED MUSCLE ADAPTATION                                               | 37  | 2.80 | <0.001 |
| PROTEIN MODIFICATION BY SMALL PROTEIN CONJUGATION OR REMOVAL             | 932 | 2.78 | <0.001 |
| RELEASE OF SEQUESTERED CALCIUM ION INTO CYTOSOL BY ENDOPLASMIC RETICULUM | 24  | 2.77 | <0.001 |
| MEMBRANE DEPOLARIZATION                                                  | 60  | 2.77 | <0.001 |
| KETONE BIOSYNTHETIC PROCESS                                              | 33  | 2.74 | <0.001 |
| POSTSYNAPTIC MEMBRANE ORGANIZATION                                       | 31  | 2.74 | <0.001 |
| REGULATION OF CARDIAC CONDUCTION                                         | 50  | 2.74 | <0.001 |
| REGULATION OF METAL ION TRANSPORT                                        | 248 | 2.70 | 0.001  |
| HEART MORPHOGENESIS                                                      | 196 | 2.68 | 0.001  |
| CARDIAC MUSCLE FIBER DEVELOPMENT                                         | 12  | 2.68 | 0.001  |
| PROTEIN TARGETING TO MITOCHONDRION                                       | 90  | 2.67 | 0.001  |
| PROTEIN POLYUBIQUITINATION                                               | 265 | 2.65 | 0.001  |
| PROTEIN TRANSMEMBRANE IMPORT INTO INTRACELLULAR ORGANELLE                | 31  | 2.63 | 0.001  |
| CARDIAC MUSCLE CELL ACTION POTENTIAL INVOLVED IN CONTRACTION             | 36  | 2.62 | 0.001  |
| RIBOSOMAL LARGE SUBUNIT BIOGENESIS                                       | 65  | 2.62 | 0.001  |
| SMOOTH MUSCLE CELL DIFFERENTIATION                                       | 52  | 2.61 | 0.001  |
| SCF DEPENDENT PROTEASOMAL UBIQUITIN DEPENDENT PROTEIN CATABOLIC PROCESS  | 83  | 2.61 | 0.001  |
| REGULATION OF RELAXATION OF CARDIAC MUSCLE                               | 5   | 2.60 | 0.001  |
| REGULATION OF HEART RATE BY CARDIAC CONDUCTION                           | 27  | 2.60 | 0.001  |
| MUSCLE ADAPTATION                                                        | 92  | 2.59 | 0.001  |
| REGULATION OF SKELETAL MUSCLE CONTRACTION                                | 9   | 2.58 | 0.001  |
| MITOCHONDRIAL TRANSPORT                                                  | 225 | 2.58 | 0.001  |

|                                                                                                  |      |      |       |
|--------------------------------------------------------------------------------------------------|------|------|-------|
| CELL COMMUNICATION INVOLVED IN CARDIAC CONDUCTION                                                | 39   | 2.58 | 0.001 |
| CARDIAC MUSCLE CELL DIFFERENTIATION                                                              | 93   | 2.57 | 0.001 |
| TRNA METABOLIC PROCESS                                                                           | 153  | 2.57 | 0.001 |
| RIBONUCLEOSIDE TRIPHOSPHATE BIOSYNTHETIC PROCESS                                                 | 51   | 2.57 | 0.001 |
| CELLULAR KETONE METABOLIC PROCESS                                                                | 179  | 2.57 | 0.001 |
| REGULATION OF SKELETAL MUSCLE ADAPTATION                                                         | 11   | 2.56 | 0.001 |
| FATTY ACID CATABOLIC PROCESS                                                                     | 87   | 2.56 | 0.002 |
| POSITIVE REGULATION OF CATION CHANNEL ACTIVITY                                                   | 41   | 2.54 | 0.002 |
| NUCLEOSIDE TRIPHOSPHATE BIOSYNTHETIC PROCESS                                                     | 61   | 2.53 | 0.002 |
| CARDIOCYTE DIFFERENTIATION                                                                       | 116  | 2.51 | 0.002 |
| TRANSMEMBRANE TRANSPORT                                                                          | 1000 | 2.50 | 0.002 |
| SKELETAL MUSCLE CELL DIFFERENTIATION                                                             | 49   | 2.50 | 0.002 |
| MEMBRANE REPOLARIZATION                                                                          | 32   | 2.49 | 0.003 |
| HEART DEVELOPMENT                                                                                | 457  | 2.48 | 0.003 |
| CYTOPLASMIC TRANSLATIONAL INITIATION                                                             | 27   | 2.47 | 0.003 |
| T TUBULE ORGANIZATION                                                                            | 6    | 2.47 | 0.003 |
| MYOSIN FILAMENT ORGANIZATION                                                                     | 8    | 2.47 | 0.003 |
| REGULATION OF CARDIAC MUSCLE CONTRACTION BY CALCIUM ION SIGNALING                                | 21   | 2.45 | 0.003 |
| PROTEIN MODIFICATION BY SMALL PROTEIN CONJUGATION                                                | 767  | 2.45 | 0.004 |
| RIBONUCLEOPROTEIN COMPLEX SUBUNIT ORGANIZATION                                                   | 178  | 2.45 | 0.004 |
| RNA CATABOLIC PROCESS                                                                            | 357  | 2.44 | 0.004 |
| REGULATION OF CARDIAC MUSCLE CONTRACTION BY REGULATION OF THE RELEASE OF SEQUESTERED CALCIUM ION | 17   | 2.44 | 0.004 |
| CELL CELL SIGNALING INVOLVED IN CARDIAC CONDUCTION                                               | 22   | 2.44 | 0.004 |
| REGULATION OF VOLTAGE GATED CALCIUM CHANNEL ACTIVITY                                             | 25   | 2.43 | 0.004 |
| RNA MODIFICATION                                                                                 | 141  | 2.43 | 0.004 |

|                                                                       |     |      |       |
|-----------------------------------------------------------------------|-----|------|-------|
| RIBOSOMAL SMALL SUBUNIT ASSEMBLY                                      | 16  | 2.43 | 0.004 |
| NEUROMUSCULAR JUNCTION DEVELOPMENT                                    | 40  | 2.42 | 0.004 |
| CALCIUM ION TRANSMEMBRANE TRANSPORT                                   | 213 | 2.42 | 0.004 |
| PROTON TRANSPORTING ATP SYNTHASE COMPLEX ASSEMBLY                     | 7   | 2.41 | 0.004 |
| REGULATION OF CALCIUM ION TRANSMEMBRANE TRANSPORT                     | 103 | 2.41 | 0.004 |
| POSITIVE REGULATION OF CALCIUM ION TRANSMEMBRANE TRANSPORTER ACTIVITY | 32  | 2.41 | 0.004 |
| TRANSITION BETWEEN FAST AND SLOW FIBER                                | 6   | 2.40 | 0.005 |
| CELLULAR PROTEIN CATABOLIC PROCESS                                    | 665 | 2.40 | 0.005 |
| NUCLEOTIDE EXCISION REPAIR DNA DAMAGE RECOGNITION                     | 22  | 2.40 | 0.005 |
| REGULATION OF ACTIN FILAMENT BASED MOVEMENT                           | 31  | 2.40 | 0.005 |
| METAL ION TRANSPORT                                                   | 543 | 2.39 | 0.005 |
| 2 OXOGLUTARATE METABOLIC PROCESS                                      | 13  | 2.38 | 0.005 |
| REGULATION OF CARDIAC MUSCLE CELL ACTION POTENTIAL                    | 21  | 2.38 | 0.005 |
| REGULATION OF RELAXATION OF MUSCLE                                    | 6   | 2.36 | 0.006 |
| VENTRICULAR CARDIAC MUSCLE CELL ACTION POTENTIAL                      | 23  | 2.36 | 0.006 |
| DNA TEMPLATED TRANSCRIPTION INITIATION                                | 207 | 2.36 | 0.006 |
| MATURATION OF SSU RRNA                                                | 45  | 2.35 | 0.006 |
| PROTEIN LOCALIZATION TO MITOCHONDRION                                 | 125 | 2.35 | 0.006 |
| RELAXATION OF CARDIAC MUSCLE                                          | 13  | 2.35 | 0.006 |
| REGULATION OF CELLULAR PROTEIN CATABOLIC PROCESS                      | 217 | 2.35 | 0.007 |
| MESONEPHRIC TUBULE MORPHOGENESIS                                      | 43  | 2.34 | 0.007 |
| VIRAL GENE EXPRESSION                                                 | 176 | 2.34 | 0.007 |
| VASCULOGENESIS                                                        | 64  | 2.33 | 0.007 |
| ACETYL COA BIOSYNTHETIC PROCESS FROM PYRUVATE                         | 15  | 2.33 | 0.007 |
| PHARYNGEAL SYSTEM DEVELOPMENT                                         | 18  | 2.33 | 0.007 |
| ENDOTHELIUM DEVELOPMENT                                               | 100 | 2.32 | 0.008 |

|                                                                                    |     |      |       |
|------------------------------------------------------------------------------------|-----|------|-------|
| REGULATION OF POTASSIUM ION TRANSMEMBRANE TRANSPORTER ACTIVITY                     | 33  | 2.31 | 0.008 |
| CREATINE METABOLIC PROCESS                                                         | 6   | 2.31 | 0.008 |
| MITOCHONDRIAL ACETYL COA BIOSYNTHETIC PROCESS FROM PYRUVATE                        | 6   | 2.30 | 0.008 |
| LUNG CELL DIFFERENTIATION                                                          | 16  | 2.30 | 0.009 |
| ISOCITRATE METABOLIC PROCESS                                                       | 6   | 2.30 | 0.009 |
| ESTABLISHMENT OF PROTEIN LOCALIZATION TO MITOCHONDRIAL MEMBRANE                    | 16  | 2.30 | 0.009 |
| MITOCHONDRIAL RESPIRATORY CHAIN COMPLEX IV ASSEMBLY                                | 6   | 2.29 | 0.009 |
| REGULATION OF CALCIUM ION TRANSPORT                                                | 164 | 2.29 | 0.009 |
| PROTEASOMAL PROTEIN CATABOLIC PROCESS                                              | 422 | 2.28 | 0.009 |
| TRNA PROCESSING                                                                    | 117 | 2.28 | 0.009 |
| RIBOSE PHOSPHATE BIOSYNTHETIC PROCESS                                              | 154 | 2.28 | 0.009 |
| CYTOCHROME COMPLEX ASSEMBLY                                                        | 9   | 2.28 | 0.010 |
| REGULATION OF DNA TEMPLATED TRANSCRIPTION IN RESPONSE TO STRESS                    | 110 | 2.27 | 0.010 |
| REGULATION OF CARDIAC MUSCLE CONTRACTION                                           | 53  | 2.27 | 0.010 |
| RENAL TUBULE DEVELOPMENT                                                           | 62  | 2.27 | 0.010 |
| NEGATIVE REGULATION OF CANONICAL WNT SIGNALING PATHWAY                             | 149 | 2.26 | 0.011 |
| NADH METABOLIC PROCESS                                                             | 36  | 2.26 | 0.011 |
| RESPIRATORY CHAIN COMPLEX IV ASSEMBLY                                              | 6   | 2.26 | 0.011 |
| POTASSIUM ION TRANSPORT                                                            | 122 | 2.26 | 0.011 |
| CARDIAC MUSCLE TISSUE DEVELOPMENT                                                  | 167 | 2.25 | 0.011 |
| GLUCOSE METABOLIC PROCESS                                                          | 172 | 2.25 | 0.011 |
| UBIQUINONE METABOLIC PROCESS                                                       | 18  | 2.25 | 0.011 |
| SUCCINATE METABOLIC PROCESS                                                        | 7   | 2.25 | 0.011 |
| POSITIVE REGULATION OF POTASSIUM ION TRANSMEMBRANE TRANSPORTER ACTIVITY            | 12  | 2.24 | 0.012 |
| RESPONSE TO MUSCLE ACTIVITY                                                        | 18  | 2.23 | 0.012 |
| REGULATION OF TRANSCRIPTION FROM RNA POLYMERASE II PROMOTER IN RESPONSE TO HYPOXIA | 72  | 2.23 | 0.012 |

|                                                                                   |     |      |       |
|-----------------------------------------------------------------------------------|-----|------|-------|
| LYMPHATIC ENDOTHELIAL CELL DIFFERENTIATION                                        | 7   | 2.23 | 0.012 |
| CAMP CATABOLIC PROCESS                                                            | 9   | 2.22 | 0.014 |
| LIPID OXIDATION                                                                   | 87  | 2.20 | 0.015 |
| CYCLIC NUCLEOTIDE METABOLIC PROCESS                                               | 31  | 2.20 | 0.015 |
| TRANSMISSION OF NERVE IMPULSE                                                     | 33  | 2.19 | 0.016 |
| RELAXATION OF MUSCLE                                                              | 22  | 2.19 | 0.016 |
| REGULATION OF MUSCLE ADAPTATION                                                   | 74  | 2.19 | 0.017 |
| PROTEIN LOCALIZATION TO ORGANELLE                                                 | 805 | 2.18 | 0.017 |
| PROTEIN INSERTION INTO MITOCHONDRIAL INNER MEMBRANE                               | 10  | 2.18 | 0.017 |
| RIBOSOMAL LARGE SUBUNIT ASSEMBLY                                                  | 26  | 2.18 | 0.018 |
| POSITIVE REGULATION OF PROTEOLYSIS INVOLVED IN CELLULAR PROTEIN CATABOLIC PROCESS | 110 | 2.18 | 0.018 |
| PROTON TRANSMEMBRANE TRANSPORT                                                    | 93  | 2.17 | 0.018 |
| REGULATION OF POTASSIUM ION TRANSPORT                                             | 58  | 2.17 | 0.018 |
| RIBOSOME DISASSEMBLY                                                              | 7   | 2.17 | 0.018 |
| PURINE CONTAINING COMPOUND BIOSYNTHETIC PROCESS                                   | 160 | 2.17 | 0.018 |
| VASCULAR SMOOTH MUSCLE CELL DIFFERENTIATION                                       | 23  | 2.17 | 0.018 |
| REGULATION OF POTASSIUM ION TRANSMEMBRANE TRANSPORT                               | 49  | 2.16 | 0.019 |
| FORMATION OF TRANSLATION PREINITIATION COMPLEX                                    | 7   | 2.16 | 0.019 |
| MITOCHONDRIAL RNA METABOLIC PROCESS                                               | 43  | 2.16 | 0.019 |
| REGULATION OF CELLULAR KETONE METABOLIC PROCESS                                   | 144 | 2.16 | 0.019 |
| REGULATION OF MEMBRANE REPOLARIZATION                                             | 25  | 2.16 | 0.020 |
| POSITIVE REGULATION OF VOLTAGE GATED CALCIUM CHANNEL ACTIVITY                     | 12  | 2.15 | 0.020 |
| CARDIAC MUSCLE CELL MEMBRANE REPOLARIZATION                                       | 25  | 2.15 | 0.020 |
| CELLULAR RESPONSE TO PURINE CONTAINING COMPOUND                                   | 13  | 2.15 | 0.020 |
| POSITIVE REGULATION OF BIOMINERALIZATION                                          | 36  | 2.14 | 0.021 |

|                                                             |     |      |       |
|-------------------------------------------------------------|-----|------|-------|
| REGULATION OF UBIQUITIN DEPENDENT PROTEIN CATABOLIC PROCESS | 137 | 2.14 | 0.021 |
| POSITIVE REGULATION OF LYASE ACTIVITY                       | 12  | 2.14 | 0.021 |
| CALCIUM ION IMPORT INTO SARCOPLASMIC RETICULUM              | 5   | 2.14 | 0.021 |
| NEGATIVE REGULATION OF WNT SIGNALING PATHWAY                | 174 | 2.14 | 0.021 |
| POSITIVE REGULATION OF BONE MINERALIZATION                  | 33  | 2.13 | 0.022 |
| REGULATION OF LYASE ACTIVITY                                | 24  | 2.12 | 0.023 |
| PROTEIN CATABOLIC PROCESS                                   | 785 | 2.12 | 0.024 |
| REGULATION OF CYCLASE ACTIVITY                              | 23  | 2.12 | 0.024 |
| INCLUSION BODY ASSEMBLY                                     | 18  | 2.11 | 0.024 |
| CIRCADIAN REGULATION OF GENE EXPRESSION                     | 54  | 2.10 | 0.026 |
| FORMATION OF CYTOPLASMIC TRANSLATION INITIATION COMPLEX     | 14  | 2.10 | 0.026 |
| SA NODE CELL TO ATRIAL CARDIAC MUSCLE CELL COMMUNICATION    | 9   | 2.10 | 0.026 |
| LUNG EPITHELIUM DEVELOPMENT                                 | 27  | 2.10 | 0.026 |
| INTRACELLULAR PROTEIN TRANSPORT                             | 993 | 2.09 | 0.029 |
| REGULATION OF MITOCHONDRIAL RNA CATABOLIC PROCESS           | 5   | 2.08 | 0.029 |
| TRNA MODIFICATION                                           | 81  | 2.08 | 0.029 |
| CAMP METABOLIC PROCESS                                      | 18  | 2.08 | 0.029 |
| REGULATION OF FATTY ACID BETA OXIDATION                     | 16  | 2.08 | 0.029 |
| MYOTUBE DIFFERENTIATION                                     | 75  | 2.07 | 0.030 |
| CALCIUM MEDIATED SIGNALING                                  | 146 | 2.07 | 0.030 |
| CELLULAR RESPONSE TO CAFFEINE                               | 10  | 2.07 | 0.030 |
| PHARYNGEAL ARCH ARTERY MORPHOGENESIS                        | 6   | 2.07 | 0.031 |
| CALCINEURIN MEDIATED SIGNALING                              | 37  | 2.07 | 0.031 |
| EAR DEVELOPMENT                                             | 143 | 2.06 | 0.031 |
| CIRCULATORY SYSTEM DEVELOPMENT                              | 851 | 2.06 | 0.032 |
| NEGATIVE REGULATION OF TRANSCRIPTION BY RNA POLYMERASE II   | 657 | 2.06 | 0.032 |
| REGULATION OF CALCIUM MEDIATED SIGNALING                    | 72  | 2.06 | 0.032 |

|                                                              |     |      |       |
|--------------------------------------------------------------|-----|------|-------|
| CELLULAR COMPONENT DISASSEMBLY                               | 462 | 2.06 | 0.032 |
| NEUROMUSCULAR SYNAPTIC TRANSMISSION                          | 16  | 2.06 | 0.032 |
| VASCULAR SMOOTH MUSCLE CELL DEVELOPMENT                      | 8   | 2.06 | 0.033 |
| SODIUM ION TRANSPORT                                         | 122 | 2.05 | 0.033 |
| POINTED END ACTIN FILAMENT CAPPING                           | 6   | 2.05 | 0.033 |
| POSTTRANSCRIPTIONAL REGULATION OF GENE<br>EXPRESSION         | 494 | 2.05 | 0.034 |
| MONOCARBOXYLIC ACID CATABOLIC PROCESS                        | 102 | 2.05 | 0.034 |
| RIBONUCLEOSIDE TRIPHOSPHATE METABOLIC<br>PROCESS             | 65  | 2.04 | 0.034 |
| REGULATION OF FATTY ACID OXIDATION                           | 27  | 2.04 | 0.034 |
| REGULATION OF MEMBRANE DEPOLARIZATION                        | 35  | 2.04 | 0.034 |
| SKELETAL MUSCLE ACETYLCHOLINE GATED<br>CHANNEL CLUSTERING    | 12  | 2.04 | 0.035 |
| NEPHRON MORPHOGENESIS                                        | 52  | 2.04 | 0.035 |
| POSITIVE REGULATION OF TRANSPORTER ACTIVITY                  | 74  | 2.03 | 0.036 |
| LYMPH VESSEL DEVELOPMENT                                     | 24  | 2.03 | 0.036 |
| ANTERIOR POSTERIOR PATTERN SPECIFICATION                     | 152 | 2.03 | 0.036 |
| DIVALENT INORGANIC CATION TRANSPORT                          | 320 | 2.03 | 0.037 |
| PROTEIN NEDDYLATION                                          | 15  | 2.03 | 0.037 |
| POSITIVE REGULATION OF CYCLASE ACTIVITY                      | 12  | 2.02 | 0.038 |
| MUSCLE ORGAN MORPHOGENESIS                                   | 59  | 2.02 | 0.038 |
| POSITIVE REGULATION OF MITOCHONDRIAL<br>TRANSLATION          | 14  | 2.02 | 0.038 |
| ANIMAL ORGAN MORPHOGENESIS                                   | 758 | 2.02 | 0.039 |
| MUSCLE CELL CELLULAR HOMEOSTASIS                             | 16  | 2.02 | 0.039 |
| CARDIAC MUSCLE TISSUE MORPHOGENESIS                          | 46  | 2.01 | 0.039 |
| POSITIVE REGULATION OF CELLULAR PROTEIN<br>CATABOLIC PROCESS | 128 | 2.01 | 0.041 |
| TRANSCRIPTION INITIATION FROM RNA<br>POLYMERASE II PROMOTER  | 164 | 2.00 | 0.042 |
| INOSITOL PHOSPHATE MEDIATED SIGNALING                        | 44  | 2.00 | 0.042 |
| LUNG SECRETORY CELL DIFFERENTIATION                          | 5   | 2.00 | 0.043 |
| SUPRAMOLECULAR FIBER ORGANIZATION                            | 541 | 2.00 | 0.043 |

|                                                                                      |     |       |        |
|--------------------------------------------------------------------------------------|-----|-------|--------|
| REGULATION OF DELAYED RECTIFIER POTASSIUM CHANNEL ACTIVITY                           | 9   | 2.00  | 0.043  |
| REGULATION OF WNT SIGNALING PATHWAY                                                  | 296 | 2.00  | 0.043  |
| ARTERY SMOOTH MUSCLE CONTRACTION                                                     | 8   | 1.99  | 0.044  |
| CARDIAC CHAMBER MORPHOGENESIS                                                        | 102 | 1.98  | 0.048  |
| MATURATION OF SSU RRNA FROM TRICISTRONIC RRNA TRANSCRIPT SSU RRNA 5 8S RRNA LSU RRNA | 33  | 1.98  | 0.048  |
| REGULATION OF TRANSLATIONAL FIDELITY                                                 | 15  | 1.98  | 0.048  |
| RRNA MODIFICATION                                                                    | 33  | 1.98  | 0.048  |
| PROTEIN TRANSMEMBRANE TRANSPORT                                                      | 54  | 1.97  | 0.048  |
| RNA METHYLATION                                                                      | 75  | 1.97  | 0.048  |
| REGULATION OF BASEMENT MEMBRANE ASSEMBLY INVOLVED IN EMBRYONIC BODY MORPHOGENESIS    | 5   | 1.97  | 0.048  |
| IMMUNE EFFECTOR PROCESS                                                              | 837 | -7.86 | <0.001 |
| MYELOID LEUKOCYTE ACTIVATION                                                         | 500 | -7.73 | <0.001 |
| CELL ACTIVATION INVOLVED IN IMMUNE RESPONSE                                          | 536 | -7.30 | <0.001 |
| DEFENSE RESPONSE                                                                     | 991 | -6.92 | <0.001 |
| EXOCYTOSIS                                                                           | 688 | -6.47 | <0.001 |
| REGULATION OF IMMUNE RESPONSE                                                        | 676 | -6.41 | <0.001 |
| RESPONSE TO BIOTIC STIMULUS                                                          | 918 | -6.32 | <0.001 |
| DEFENSE RESPONSE TO OTHER ORGANISM                                                   | 668 | -6.17 | <0.001 |
| INFLAMMATORY RESPONSE                                                                | 452 | -5.90 | <0.001 |
| LYMPHOCYTE ACTIVATION                                                                | 477 | -5.82 | <0.001 |
| POSITIVE REGULATION OF IMMUNE SYSTEM PROCESS                                         | 746 | -5.62 | <0.001 |
| REGULATION OF CELL ACTIVATION                                                        | 394 | -5.60 | <0.001 |
| CHROMOSOME ORGANIZATION                                                              | 928 | -5.42 | <0.001 |
| POSITIVE REGULATION OF IMMUNE RESPONSE                                               | 530 | -5.33 | <0.001 |
| CYTOKINE PRODUCTION                                                                  | 538 | -5.15 | <0.001 |
| PHAGOCYTOSIS                                                                         | 214 | -5.11 | <0.001 |
| T CELL ACTIVATION                                                                    | 322 | -5.02 | <0.001 |
| LEUKOCYTE MIGRATION                                                                  | 291 | -4.85 | <0.001 |
| LEUKOCYTE PROLIFERATION                                                              | 192 | -4.60 | <0.001 |

|                                                          |     |       |        |
|----------------------------------------------------------|-----|-------|--------|
| DNA DEPENDENT DNA REPLICATION                            | 132 | -4.58 | <0.001 |
| RESPONSE TO BACTERIUM                                    | 352 | -4.55 | <0.001 |
| REGULATION OF DEFENSE RESPONSE                           | 512 | -4.49 | <0.001 |
| CHROMATIN ORGANIZATION                                   | 581 | -4.48 | <0.001 |
| LEUKOCYTE DIFFERENTIATION                                | 377 | -4.45 | <0.001 |
| POSITIVE REGULATION OF CYTOKINE PRODUCTION               | 311 | -4.40 | <0.001 |
| TUMOR NECROSIS FACTOR SUPERFAMILY<br>CYTOKINE PRODUCTION | 115 | -4.35 | <0.001 |
| RESPONSE TO CYTOKINE                                     | 837 | -4.35 | <0.001 |
| REGULATION OF LYMPHOCYTE ACTIVATION                      | 304 | -4.35 | <0.001 |
| LEUKOCYTE CELL CELL ADHESION                             | 240 | -4.30 | <0.001 |
| DNA REPLICATION                                          | 237 | -4.28 | <0.001 |
| MRNA PROCESSING                                          | 452 | -4.28 | <0.001 |
| DNA REPAIR                                               | 471 | -4.26 | <0.001 |
| NEGATIVE REGULATION OF IMMUNE SYSTEM<br>PROCESS          | 317 | -4.23 | <0.001 |
| REGULATION OF IMMUNE EFFECTOR PROCESS                    | 274 | -4.20 | <0.001 |
| CELL DIVISION                                            | 474 | -4.18 | <0.001 |
| REGULATION OF T CELL ACTIVATION                          | 219 | -4.18 | <0.001 |
| REGULATION OF LEUKOCYTE PROLIFERATION                    | 146 | -4.16 | <0.001 |
| B CELL ACTIVATION                                        | 179 | -4.14 | <0.001 |
| REGULATION OF LEUKOCYTE MEDIATED IMMUNITY                | 135 | -4.13 | <0.001 |
| DNA METABOLIC PROCESS                                    | 740 | -4.12 | <0.001 |
| POSITIVE REGULATION OF CELL ACTIVATION                   | 234 | -4.10 | <0.001 |
| CYTOKINE MEDIATED SIGNALING PATHWAY                      | 514 | -4.05 | <0.001 |
| DNA CONFORMATION CHANGE                                  | 202 | -4.05 | <0.001 |
| MITOTIC CELL CYCLE                                       | 835 | -3.99 | <0.001 |
| MAST CELL ACTIVATION                                     | 46  | -3.93 | <0.001 |
| MYELOID LEUKOCYTE MIGRATION                              | 128 | -3.93 | <0.001 |
| COAGULATION                                              | 234 | -3.92 | <0.001 |
| IMMUNE SYSTEM DEVELOPMENT                                | 740 | -3.92 | <0.001 |
| REGULATION OF RESPONSE TO EXTERNAL<br>STIMULUS           | 743 | -3.90 | <0.001 |

|                                                                                                                           |     |       |        |
|---------------------------------------------------------------------------------------------------------------------------|-----|-------|--------|
| MYELOID CELL DIFFERENTIATION                                                                                              | 317 | -3.90 | <0.001 |
| REGULATION OF INFLAMMATORY RESPONSE                                                                                       | 229 | -3.89 | <0.001 |
| INTERLEUKIN 6 PRODUCTION                                                                                                  | 102 | -3.87 | <0.001 |
| NEGATIVE REGULATION OF CELL ACTIVATION                                                                                    | 138 | -3.87 | <0.001 |
| DEFENSE RESPONSE TO BACTERIUM                                                                                             | 98  | -3.87 | <0.001 |
| CELLULAR RESPONSE TO DNA DAMAGE STIMULUS                                                                                  | 737 | -3.85 | <0.001 |
| LYMPHOCYTE MEDIATED IMMUNITY                                                                                              | 150 | -3.83 | <0.001 |
| CHROMATIN ASSEMBLY OR DISASSEMBLY                                                                                         | 93  | -3.81 | <0.001 |
| MAST CELL MEDIATED IMMUNITY                                                                                               | 39  | -3.79 | <0.001 |
| RNA SPLICING                                                                                                              | 391 | -3.79 | <0.001 |
| IMMUNE RESPONSE REGULATING SIGNALING PATHWAY                                                                              | 402 | -3.79 | <0.001 |
| CYTOKINE SECRETION                                                                                                        | 144 | -3.76 | <0.001 |
| MEIOTIC CELL CYCLE                                                                                                        | 133 | -3.75 | <0.001 |
| HUMORAL IMMUNE RESPONSE                                                                                                   | 98  | -3.71 | <0.001 |
| REGULATION OF MYELOID LEUKOCYTE MEDIATED IMMUNITY                                                                         | 46  | -3.69 | <0.001 |
| CELL CYCLE DNA REPLICATION                                                                                                | 58  | -3.69 | <0.001 |
| CARBOHYDRATE DERIVATIVE METABOLIC PROCESS                                                                                 | 853 | -3.69 | <0.001 |
| RNA EXPORT FROM NUCLEUS                                                                                                   | 124 | -3.68 | <0.001 |
| LYMPHOCYTE DIFFERENTIATION                                                                                                | 254 | -3.66 | <0.001 |
| REGULATION OF PHAGOCYTOSIS                                                                                                | 68  | -3.65 | <0.001 |
| POSITIVE REGULATION OF DEFENSE RESPONSE                                                                                   | 333 | -3.64 | <0.001 |
| RNA SPLICING VIA TRANSESTERIFICATION REACTIONS                                                                            | 313 | -3.62 | <0.001 |
| ADAPTIVE IMMUNE RESPONSE BASED ON SOMATIC RECOMBINATION OF IMMUNE RECEPTORS BUILT FROM IMMUNOGLOBULIN SUPERFAMILY DOMAINS | 171 | -3.62 | <0.001 |
| POSITIVE REGULATION OF TUMOR NECROSIS FACTOR SUPERFAMILY CYTOKINE PRODUCTION                                              | 66  | -3.61 | <0.001 |
| REGULATION OF BODY FLUID LEVELS                                                                                           | 328 | -3.61 | <0.001 |
| MRNA EXPORT FROM NUCLEUS                                                                                                  | 99  | -3.59 | <0.001 |
| MEIOTIC CELL CYCLE PROCESS                                                                                                | 98  | -3.59 | <0.001 |

|                                                       |     |       |        |
|-------------------------------------------------------|-----|-------|--------|
| POSITIVE REGULATION OF RESPONSE TO EXTERNAL STIMULUS  | 427 | -3.58 | <0.001 |
| GRANULOCYTE MIGRATION                                 | 81  | -3.57 | <0.001 |
| REGULATION OF LEUKOCYTE DEGRANULATION                 | 37  | -3.56 | <0.001 |
| NEGATIVE REGULATION OF LYMPHOCYTE ACTIVATION          | 99  | -3.55 | <0.001 |
| NEGATIVE REGULATION OF CYTOKINE PRODUCTION            | 194 | -3.54 | <0.001 |
| POSITIVE REGULATION OF INFLAMMATORY RESPONSE          | 88  | -3.53 | <0.001 |
| CHROMOSOME SEGREGATION                                | 244 | -3.50 | <0.001 |
| CELLULAR DEFENSE RESPONSE                             | 26  | -3.50 | <0.001 |
| T CELL PROLIFERATION                                  | 120 | -3.50 | <0.001 |
| DNA PACKAGING                                         | 101 | -3.49 | <0.001 |
| REGULATION OF CELL CELL ADHESION                      | 291 | -3.48 | <0.001 |
| RESPONSE TO MOLECULE OF BACTERIAL ORIGIN              | 227 | -3.48 | <0.001 |
| MRNA TRANSPORT                                        | 131 | -3.48 | <0.001 |
| LEUKOCYTE CHEMOTAXIS                                  | 132 | -3.46 | <0.001 |
| NUCLEOSOME ORGANIZATION                               | 85  | -3.45 | <0.001 |
| INTERFERON GAMMA PRODUCTION                           | 63  | -3.44 | <0.001 |
| NUCLEOBASE CONTAINING COMPOUND TRANSPORT              | 207 | -3.44 | <0.001 |
| CHROMATIN ASSEMBLY                                    | 69  | -3.43 | <0.001 |
| REGULATION OF LEUKOCYTE DIFFERENTIATION               | 199 | -3.42 | <0.001 |
| DNA DEPENDENT DNA REPLICATION MAINTENANCE OF FIDELITY | 38  | -3.41 | <0.001 |
| REGULATION OF SECRETION                               | 525 | -3.41 | <0.001 |
| NEUROINFLAMMATORY RESPONSE                            | 49  | -3.41 | <0.001 |
| POSITIVE REGULATION OF LEUKOCYTE CELL CELL ADHESION   | 153 | -3.41 | <0.001 |
| POSITIVE REGULATION OF IMMUNE EFFECTOR PROCESS        | 144 | -3.40 | <0.001 |
| REGULATION OF LEUKOCYTE MIGRATION                     | 141 | -3.40 | <0.001 |
| DOUBLE STRAND BREAK REPAIR                            | 211 | -3.40 | <0.001 |
| DNA RECOMBINATION                                     | 225 | -3.37 | <0.001 |

|                                                      |     |       |        |
|------------------------------------------------------|-----|-------|--------|
| ION HOMEOSTASIS                                      | 528 | -3.37 | <0.001 |
| POSITIVE REGULATION OF CYTOKINE BIOSYNTHETIC PROCESS | 49  | -3.37 | <0.001 |
| TOLL LIKE RECEPTOR SIGNALING PATHWAY                 | 110 | -3.37 | <0.001 |
| HOMEOSTASIS OF NUMBER OF CELLS                       | 199 | -3.36 | <0.001 |
| POSITIVE REGULATION OF LEUKOCYTE PROLIFERATION       | 92  | -3.35 | <0.001 |
| ALPHA BETA T CELL ACTIVATION                         | 100 | -3.35 | <0.001 |
| WOUND HEALING                                        | 398 | -3.34 | <0.001 |
| SIGNAL TRANSDUCTION IN RESPONSE TO DNA DAMAGE        | 121 | -3.34 | <0.001 |
| REGULATION OF B CELL ACTIVATION                      | 96  | -3.34 | <0.001 |
| NEUTROPHIL MIGRATION                                 | 65  | -3.33 | <0.001 |
| ATP DEPENDENT CHROMATIN REMODELING                   | 61  | -3.32 | <0.001 |
| DNA REPLICATION INDEPENDENT NUCLEOSOME ORGANIZATION  | 32  | -3.31 | <0.001 |
| PLATELET ACTIVATION                                  | 119 | -3.31 | <0.001 |
| RNA LOCALIZATION                                     | 207 | -3.30 | <0.001 |
| PROTEIN N LINKED GLYCOSYLATION                       | 67  | -3.28 | <0.001 |
| B CELL PROLIFERATION                                 | 60  | -3.27 | <0.001 |
| CELL KILLING                                         | 76  | -3.27 | <0.001 |
| ESTABLISHMENT OF RNA LOCALIZATION                    | 174 | -3.27 | <0.001 |
| CELL CYCLE CHECKPOINT                                | 195 | -3.26 | <0.001 |
| COVALENT CHROMATIN MODIFICATION                      | 396 | -3.26 | <0.001 |
| CHEMICAL HOMEOSTASIS                                 | 768 | -3.26 | <0.001 |
| REGULATION OF MULTI ORGANISM PROCESS                 | 533 | -3.25 | <0.001 |
| INTERLEUKIN 12 PRODUCTION                            | 41  | -3.24 | <0.001 |
| REGULATION OF GENE EXPRESSION EPIGENETIC             | 243 | -3.24 | <0.001 |
| ORGANELLE FISSION                                    | 324 | -3.24 | <0.001 |
| POSITIVE REGULATION OF CELL CELL ADHESION            | 180 | -3.23 | <0.001 |
| REGULATION OF ADAPTIVE IMMUNE RESPONSE               | 114 | -3.22 | <0.001 |
| CELL CYCLE PHASE TRANSITION                          | 513 | -3.22 | <0.001 |
| REGULATION OF CYSTEINE TYPE ENDOPEPTIDASE ACTIVITY   | 167 | -3.21 | <0.001 |

|                                                                |     |       |        |
|----------------------------------------------------------------|-----|-------|--------|
| MEIOTIC CHROMOSOME SEGREGATION                                 | 45  | -3.21 | <0.001 |
| MITOTIC CELL CYCLE CHECKPOINT                                  | 147 | -3.21 | <0.001 |
| B CELL RECEPTOR SIGNALING PATHWAY                              | 44  | -3.21 | <0.001 |
| MEMBRANE DOCKING                                               | 159 | -3.21 | <0.001 |
| INTERLEUKIN 8 PRODUCTION                                       | 56  | -3.20 | <0.001 |
| MYELOID LEUKOCYTE DIFFERENTIATION                              | 156 | -3.20 | <0.001 |
| REGULATION OF PEPTIDASE ACTIVITY                               | 278 | -3.19 | <0.001 |
| REGULATION OF RESPONSE TO BIOTIC STIMULUS                      | 355 | -3.18 | <0.001 |
| CHROMATIN REMODELING AT CENTROMERE                             | 26  | -3.18 | <0.001 |
| IMPORT INTO CELL                                               | 522 | -3.17 | <0.001 |
| MEIOSIS I CELL CYCLE PROCESS                                   | 57  | -3.17 | <0.001 |
| DNA STRAND ELONGATION                                          | 21  | -3.17 | <0.001 |
| PEPTIDE SECRETION                                              | 411 | -3.15 | <0.001 |
| B CELL MEDIATED IMMUNITY                                       | 76  | -3.14 | <0.001 |
| RESPONSE TO DRUG                                               | 692 | -3.14 | <0.001 |
| REGULATION OF HYDROLASE ACTIVITY                               | 916 | -3.14 | <0.001 |
| REGULATION OF CELL CYCLE PROCESS                               | 614 | -3.14 | <0.001 |
| POSITIVE REGULATION OF INTERFERON GAMMA PRODUCTION             | 39  | -3.13 | <0.001 |
| NUCLEAR EXPORT                                                 | 179 | -3.12 | <0.001 |
| PATTERN RECOGNITION RECEPTOR SIGNALING PATHWAY                 | 145 | -3.12 | <0.001 |
| DNA STRAND ELONGATION INVOLVED IN DNA REPLICATION              | 15  | -3.12 | <0.001 |
| REGULATION OF ALPHA BETA T CELL ACTIVATION                     | 70  | -3.11 | <0.001 |
| CELL CELL ADHESION                                             | 553 | -3.10 | <0.001 |
| NUCLEAR CHROMOSOME SEGREGATION                                 | 190 | -3.10 | <0.001 |
| T CELL DIFFERENTIATION                                         | 175 | -3.09 | <0.001 |
| REGULATION OF CELL ADHESION                                    | 519 | -3.08 | <0.001 |
| METAL ION HOMEOSTASIS                                          | 414 | -3.08 | <0.001 |
| INTERLEUKIN 10 PRODUCTION                                      | 37  | -3.08 | <0.001 |
| REGULATION OF MAST CELL ACTIVATION INVOLVED IN IMMUNE RESPONSE | 26  | -3.08 | <0.001 |

|                                                        |     |       |        |
|--------------------------------------------------------|-----|-------|--------|
| INTEGRIN MEDIATED SIGNALING PATHWAY                    | 91  | -3.08 | <0.001 |
| TELOMERE MAINTENANCE VIA SEMI CONSERVATIVE REPLICATION | 27  | -3.06 | <0.001 |
| REGULATION OF MAST CELL ACTIVATION                     | 33  | -3.06 | <0.001 |
| POSITIVE REGULATION OF CYTOKINE SECRETION              | 80  | -3.06 | <0.001 |
| BIOLOGICAL ADHESION                                    | 979 | -3.06 | <0.001 |
| CELL CHEMOTAXIS                                        | 187 | -3.05 | <0.001 |
| CENTROMERE COMPLEX ASSEMBLY                            | 33  | -3.04 | <0.001 |
| NATURAL KILLER CELL ACTIVATION                         | 43  | -3.04 | <0.001 |
| RESPONSE TO WOUNDING                                   | 480 | -3.04 | <0.001 |
| POSITIVE REGULATION OF T CELL PROLIFERATION            | 58  | -3.03 | <0.001 |
| CYTOKINE METABOLIC PROCESS                             | 82  | -3.03 | <0.001 |
| POSITIVE REGULATION OF INTERLEUKIN 6 PRODUCTION        | 61  | -3.03 | <0.001 |
| DETECTION OF MOLECULE OF BACTERIAL ORIGIN              | 9   | -3.03 | <0.001 |
| DETECTION OF EXTERNAL BIOTIC STIMULUS                  | 11  | -3.02 | <0.001 |
| INTERLEUKIN 1 PRODUCTION                               | 55  | -3.02 | <0.001 |
| INTERLEUKIN 1 BETA PRODUCTION                          | 50  | -3.02 | <0.001 |
| POSITIVE REGULATION OF SECRETION                       | 284 | -3.02 | <0.001 |
| ENDOCYTOSIS                                            | 429 | -3.01 | <0.001 |
| INTERLEUKIN 6 SECRETION                                | 34  | -3.01 | <0.001 |
| CHROMATIN REMODELING                                   | 129 | -3.00 | <0.001 |
| TRANSITION METAL ION TRANSPORT                         | 87  | -3.00 | <0.001 |
| RNA 3 END PROCESSING                                   | 133 | -3.00 | <0.001 |
| CELLULAR EXTRAVASATION                                 | 56  | -3.00 | <0.001 |
| MITOTIC NUCLEAR DIVISION                               | 218 | -3.00 | <0.001 |
| CELL CYCLE G1 S PHASE TRANSITION                       | 226 | -2.99 | <0.001 |
| SPINDLE ASSEMBLY                                       | 94  | -2.99 | <0.001 |
| DNA REPLICATION INITIATION                             | 32  | -2.99 | <0.001 |
| CELLULAR ION HOMEOSTASIS                               | 429 | -2.99 | <0.001 |
| LYMPHOCYTE ACTIVATION INVOLVED IN IMMUNE RESPONSE      | 123 | -2.98 | <0.001 |
| REGULATION OF B CELL PROLIFERATION                     | 50  | -2.98 | <0.001 |

|                                                                    |     |       |        |
|--------------------------------------------------------------------|-----|-------|--------|
| RECOMBINATIONAL REPAIR                                             | 123 | -2.96 | <0.001 |
| DNA DAMAGE RESPONSE SIGNAL TRANSDUCTION BY P53 CLASS MEDIATOR      | 97  | -2.96 | <0.001 |
| REGULATION OF MITOTIC CELL CYCLE                                   | 532 | -2.95 | <0.001 |
| HEME METABOLIC PROCESS                                             | 23  | -2.95 | <0.001 |
| HISTONE EXCHANGE                                                   | 34  | -2.95 | <0.001 |
| MRNA 3 END PROCESSING                                              | 95  | -2.94 | <0.001 |
| NEGATIVE REGULATION OF TRANSPORT                                   | 335 | -2.94 | <0.001 |
| NEGATIVE REGULATION OF IMMUNE RESPONSE                             | 99  | -2.93 | <0.001 |
| POSITIVE REGULATION OF CELL CYCLE PROCESS                          | 216 | -2.93 | <0.001 |
| REGULATION OF CELL CYCLE                                           | 970 | -2.93 | <0.001 |
| SISTER CHROMATID SEGREGATION                                       | 150 | -2.92 | <0.001 |
| HYALURONAN CATABOLIC PROCESS                                       | 16  | -2.92 | <0.001 |
| DNA INTEGRITY CHECKPOINT                                           | 144 | -2.91 | <0.001 |
| MITOTIC DNA INTEGRITY CHECKPOINT                                   | 95  | -2.91 | <0.001 |
| REGULATION OF MRNA PROCESSING                                      | 120 | -2.91 | <0.001 |
| CELLULAR RESPONSE TO BIOTIC STIMULUS                               | 161 | -2.90 | <0.001 |
| IMMUNE RESPONSE REGULATING CELL SURFACE RECEPTOR SIGNALING PATHWAY | 278 | -2.90 | <0.001 |
| REPLICATION FORK PROCESSING                                        | 30  | -2.90 | <0.001 |
| RESPIRATORY BURST                                                  | 21  | -2.89 | <0.001 |
| REGULATION OF NEUROINFLAMMATORY RESPONSE                           | 21  | -2.89 | <0.001 |
| G PROTEIN COUPLED PURINERGIC RECEPTOR SIGNALING PATHWAY            | 17  | -2.89 | <0.001 |
| POSITIVE REGULATION OF RESPONSE TO BIOTIC STIMULUS                 | 269 | -2.89 | <0.001 |
| POSITIVE REGULATION OF LEUKOCYTE MEDIATED IMMUNITY                 | 83  | -2.89 | <0.001 |
| RECEPTOR MEDIATED ENDOCYTOSIS                                      | 195 | -2.88 | <0.001 |
| LEUKOCYTE HOMEOSTASIS                                              | 67  | -2.88 | <0.001 |
| REGULATION OF PEPTIDE SECRETION                                    | 328 | -2.87 | <0.001 |
| PROTOPORPHYRINOGEN IX METABOLIC PROCESS                            | 11  | -2.87 | <0.001 |
| RESPONSE TO INTERFERON GAMMA                                       | 119 | -2.87 | <0.001 |
| INTERLEUKIN 8 SECRETION                                            | 22  | -2.86 | <0.001 |

|                                                        |     |       |        |
|--------------------------------------------------------|-----|-------|--------|
| GLIAL CELL ACTIVATION                                  | 42  | -2.85 | <0.001 |
| REGULATION OF CHROMOSOME ORGANIZATION                  | 287 | -2.85 | <0.001 |
| NCRNA EXPORT FROM NUCLEUS                              | 33  | -2.85 | <0.001 |
| MACROPHAGE ACTIVATION                                  | 69  | -2.84 | <0.001 |
| GENE SILENCING                                         | 187 | -2.84 | <0.001 |
| MYELOID CELL DEVELOPMENT                               | 60  | -2.84 | <0.001 |
| PORPHYRIN CONTAINING COMPOUND METABOLIC PROCESS        | 27  | -2.84 | <0.001 |
| ALCOHOL BIOSYNTHETIC PROCESS                           | 134 | -2.84 | <0.001 |
| POSITIVE REGULATION OF HYDROLASE ACTIVITY              | 565 | -2.84 | <0.001 |
| RESPONSE TO NITROGEN COMPOUND                          | 810 | -2.84 | <0.001 |
| MICROTUBULE ORGANIZING CENTER ORGANIZATION             | 117 | -2.83 | <0.001 |
| G PROTEIN COUPLED RECEPTOR SIGNALING PATHWAY           | 466 | -2.83 | <0.001 |
| LIPID BIOSYNTHETIC PROCESS                             | 528 | -2.83 | <0.001 |
| RESPONSE TO TYPE I INTERFERON                          | 61  | -2.83 | <0.001 |
| ACUTE INFLAMMATORY RESPONSE                            | 58  | -2.82 | <0.001 |
| MYELOID CELL HOMEOSTASIS                               | 128 | -2.82 | <0.001 |
| RESPONSE TO VIRUS                                      | 217 | -2.82 | <0.001 |
| REGULATION OF CELL CYCLE PHASE TRANSITION              | 379 | -2.81 | <0.001 |
| LEUKOCYTE ACTIVATION INVOLVED IN INFLAMMATORY RESPONSE | 34  | -2.81 | <0.001 |
| PLATELET AGGREGATION                                   | 48  | -2.81 | <0.001 |
| COMPLEMENT ACTIVATION                                  | 39  | -2.81 | <0.001 |
| REGULATION OF NEUTROPHIL ACTIVATION                    | 11  | -2.80 | <0.001 |
| B CELL DIFFERENTIATION                                 | 92  | -2.80 | <0.001 |
| INTERFERON GAMMA MEDIATED SIGNALING PATHWAY            | 54  | -2.80 | <0.001 |
| NEGATIVE REGULATION OF SECRETION                       | 143 | -2.79 | <0.001 |
| RESPONSE TO TOXIC SUBSTANCE                            | 360 | -2.79 | <0.001 |
| LEUKOCYTE TETHERING OR ROLLING                         | 21  | -2.78 | <0.001 |
| IRON ION TRANSPORT                                     | 55  | -2.78 | <0.001 |
| GLYCOPROTEIN METABOLIC PROCESS                         | 300 | -2.78 | <0.001 |

|                                                          |     |       |        |
|----------------------------------------------------------|-----|-------|--------|
| SPINDLE ORGANIZATION                                     | 145 | -2.77 | <0.001 |
| INTERLEUKIN 6 BIOSYNTHETIC PROCESS                       | 16  | -2.77 | <0.001 |
| TUMOR NECROSIS FACTOR BIOSYNTHETIC PROCESS               | 20  | -2.76 | <0.001 |
| POSITIVE REGULATION OF LEUKOCYTE MIGRATION               | 97  | -2.76 | <0.001 |
| MITOTIC SISTER CHROMATID SEGREGATION                     | 126 | -2.76 | <0.001 |
| REGULATION OF LYMPHOCYTE MEDIATED IMMUNITY               | 90  | -2.76 | <0.001 |
| LEUKOCYTE MEDIATED CYTOTOXICITY                          | 55  | -2.75 | <0.001 |
| REGULATION OF TOLL LIKE RECEPTOR SIGNALING PATHWAY       | 51  | -2.75 | <0.001 |
| ALPHA BETA T CELL PROLIFERATION                          | 23  | -2.75 | <0.001 |
| REGULATION OF TRANSFERASE ACTIVITY                       | 773 | -2.75 | <0.001 |
| POSITIVE REGULATION OF MULTI ORGANISM PROCESS            | 386 | -2.74 | <0.001 |
| TOLL LIKE RECEPTOR 9 SIGNALING PATHWAY                   | 19  | -2.74 | <0.001 |
| DOUBLE STRAND BREAK REPAIR VIA BREAK INDUCED REPLICATION | 9   | -2.74 | <0.001 |
| CELLULAR HOMEOSTASIS                                     | 638 | -2.73 | <0.001 |
| CELLULAR RESPONSE TO OXYGEN CONTAINING COMPOUND          | 850 | -2.72 | <0.001 |
| REGULATION OF LEUKOCYTE APOPTOTIC PROCESS                | 64  | -2.72 | <0.001 |
| G1 DNA DAMAGE CHECKPOINT                                 | 60  | -2.72 | <0.001 |
| DNA GEOMETRIC CHANGE                                     | 103 | -2.72 | <0.001 |
| ORGANOPHOSPHATE METABOLIC PROCESS                        | 813 | -2.71 | <0.001 |
| ADENOSINE RECEPTOR SIGNALING PATHWAY                     | 9   | -2.71 | <0.001 |
| POSITIVE REGULATION OF TRANSPORT                         | 697 | -2.70 | <0.001 |
| CENTROSOME DUPLICATION                                   | 57  | -2.70 | <0.001 |
| REGULATION OF ALCOHOL BIOSYNTHETIC PROCESS               | 60  | -2.70 | <0.001 |
| NATURAL KILLER CELL MEDIATED IMMUNITY                    | 28  | -2.69 | <0.001 |
| PROTEIN DNA COMPLEX SUBUNIT ORGANIZATION                 | 176 | -2.69 | <0.001 |
| FC RECEPTOR MEDIATED STIMULATORY SIGNALING PATHWAY       | 76  | -2.69 | <0.001 |
| POSITIVE REGULATION OF PEPTIDE SECRETION                 | 189 | -2.69 | <0.001 |

|                                                                              |     |       |        |
|------------------------------------------------------------------------------|-----|-------|--------|
| CELLULAR RESPONSE TO AMMONIUM ION                                            | 63  | -2.69 | <0.001 |
| REGULATION OF KINASE ACTIVITY                                                | 683 | -2.68 | <0.001 |
| NUCLEAR TRANSPORT                                                            | 302 | -2.67 | <0.001 |
| DETECTION OF BIOTIC STIMULUS                                                 | 21  | -2.67 | <0.001 |
| PRODUCTION OF MOLECULAR MEDIATOR OF IMMUNE RESPONSE                          | 143 | -2.67 | <0.001 |
| POSITIVE REGULATION OF CELL POPULATION PROLIFERATION                         | 637 | -2.67 | <0.001 |
| PURINERGIC RECEPTOR SIGNALING PATHWAY                                        | 21  | -2.67 | <0.001 |
| NEGATIVE REGULATION OF TUMOR NECROSIS FACTOR SUPERFAMILY CYTOKINE PRODUCTION | 40  | -2.66 | <0.001 |
| GLYCOPROTEIN BIOSYNTHETIC PROCESS                                            | 249 | -2.66 | <0.001 |
| PEPTIDYL LYSINE MODIFICATION                                                 | 335 | -2.65 | <0.001 |
| PLATELET MORPHOGENESIS                                                       | 20  | -2.65 | <0.001 |
| ORGANELLE LOCALIZATION                                                       | 527 | -2.64 | 0.001  |
| REGULATION OF HUMORAL IMMUNE RESPONSE                                        | 39  | -2.64 | 0.001  |
| TOLL LIKE RECEPTOR 4 SIGNALING PATHWAY                                       | 25  | -2.64 | 0.001  |
| CELLULAR LIPID METABOLIC PROCESS                                             | 756 | -2.63 | 0.001  |
| POSITIVE REGULATION OF PHAGOCYTOSIS                                          | 45  | -2.63 | 0.001  |
| NEGATIVE REGULATION OF CELL CYCLE G1 S PHASE TRANSITION                      | 93  | -2.63 | 0.001  |
| POSITIVE REGULATION OF CYSTEINE TYPE ENDOPEPTIDASE ACTIVITY                  | 105 | -2.62 | 0.001  |
| DEFENSE RESPONSE TO VIRUS                                                    | 156 | -2.61 | 0.001  |
| POSITIVE REGULATION OF INTERLEUKIN 8 PRODUCTION                              | 34  | -2.61 | 0.001  |
| POSITIVE REGULATION OF ADAPTIVE IMMUNE RESPONSE                              | 73  | -2.61 | 0.001  |
| REGULATION OF VESICLE MEDIATED TRANSPORT                                     | 411 | -2.61 | 0.001  |
| POSITIVE REGULATION OF APOPTOTIC CELL CLEARANCE                              | 5   | -2.61 | 0.001  |
| SIGNAL TRANSDUCTION INVOLVED IN CELL CYCLE CHECKPOINT                        | 68  | -2.60 | 0.001  |
| REGULATION OF CELL CYCLE G2 M PHASE TRANSITION                               | 188 | -2.60 | 0.001  |

|                                                                       |     |       |       |
|-----------------------------------------------------------------------|-----|-------|-------|
| RESPONSE TO PEPTIDOGLYCAN                                             | 9   | -2.60 | 0.001 |
| SMALL MOLECULE BIOSYNTHETIC PROCESS                                   | 540 | -2.59 | 0.001 |
| OLIGOSACCHARIDE LIPID INTERMEDIATE<br>BIOSYNTHETIC PROCESS            | 18  | -2.59 | 0.001 |
| MICROTUBULE CYTOSKELETON ORGANIZATION                                 | 432 | -2.58 | 0.001 |
| MITOTIC SPINDLE ASSEMBLY                                              | 50  | -2.58 | 0.001 |
| REGULATION OF TISSUE REMODELING                                       | 55  | -2.58 | 0.001 |
| POSITIVE REGULATION OF CELL ADHESION                                  | 303 | -2.58 | 0.001 |
| NEGATIVE REGULATION OF TISSUE REMODELING                              | 14  | -2.58 | 0.001 |
| REGULATION OF HEMOPOIESIS                                             | 351 | -2.58 | 0.001 |
| PEPTIDYL AMINO ACID MODIFICATION                                      | 997 | -2.58 | 0.001 |
| MEMBRANE LIPID CATABOLIC PROCESS                                      | 24  | -2.58 | 0.001 |
| POSITIVE REGULATION OF B CELL ACTIVATION                              | 60  | -2.57 | 0.001 |
| POSITIVE REGULATION OF INTERLEUKIN 6<br>SECRETION                     | 21  | -2.57 | 0.001 |
| POSITIVE REGULATION OF GTPASE ACTIVITY                                | 303 | -2.57 | 0.001 |
| FATTY ACID DERIVATIVE METABOLIC PROCESS                               | 94  | -2.57 | 0.001 |
| REGULATION OF MYELOID LEUKOCYTE<br>DIFFERENTIATION                    | 85  | -2.56 | 0.001 |
| NEGATIVE REGULATION OF LEUKOCYTE MEDIATED<br>IMMUNITY                 | 30  | -2.56 | 0.001 |
| PLATELET DEGRANULATION                                                | 98  | -2.56 | 0.001 |
| STEROL BIOSYNTHETIC PROCESS                                           | 61  | -2.56 | 0.001 |
| REGULATION OF MRNA SPLICING VIA SPLICEOSOME                           | 84  | -2.56 | 0.001 |
| POSITIVE REGULATION OF INTERLEUKIN 6<br>BIOSYNTHETIC PROCESS          | 12  | -2.56 | 0.001 |
| CILIARY BASAL BODY PLASMA MEMBRANE DOCKING                            | 87  | -2.55 | 0.001 |
| POSITIVE REGULATION OF ACUTE INFLAMMATORY<br>RESPONSE                 | 14  | -2.55 | 0.001 |
| PRODUCTION OF MOLECULAR MEDIATOR INVOLVED<br>IN INFLAMMATORY RESPONSE | 44  | -2.55 | 0.001 |
| ALCOHOL METABOLIC PROCESS                                             | 254 | -2.55 | 0.001 |
| NEGATIVE REGULATION OF ESTABLISHMENT OF<br>PROTEIN LOCALIZATION       | 131 | -2.55 | 0.001 |

|                                                                                  |     |       |       |
|----------------------------------------------------------------------------------|-----|-------|-------|
| REGULATION OF PHOSPHOLIPID CATABOLIC PROCESS                                     | 5   | -2.55 | 0.001 |
| REGULATION OF NEUTROPHIL DEGRANULATION                                           | 8   | -2.55 | 0.001 |
| GRANULOCYTE DIFFERENTIATION                                                      | 29  | -2.55 | 0.001 |
| NEGATIVE REGULATION OF DEFENSE RESPONSE                                          | 144 | -2.55 | 0.001 |
| ACTIVATION OF CYSTEINE TYPE ENDOPEPTIDASE ACTIVITY INVOLVED IN APOPTOTIC PROCESS | 63  | -2.54 | 0.001 |
| REGULATION OF PROTEIN SERINE THREONINE KINASE ACTIVITY                           | 409 | -2.54 | 0.001 |
| POSITIVE REGULATION OF TYPE I INTERFERON PRODUCTION                              | 70  | -2.54 | 0.001 |
| CHROMOSOME ORGANIZATION INVOLVED IN MEIOTIC CELL CYCLE                           | 34  | -2.54 | 0.001 |
| POSITIVE REGULATION OF RECEPTOR SIGNALING PATHWAY VIA STAT                       | 50  | -2.54 | 0.001 |
| ERYTHROCYTE HOMEOSTASIS                                                          | 105 | -2.53 | 0.001 |
| CHEMOKINE PRODUCTION                                                             | 61  | -2.53 | 0.001 |
| ANTIMICROBIAL HUMORAL RESPONSE                                                   | 33  | -2.53 | 0.001 |
| FATTY ACID BIOSYNTHETIC PROCESS                                                  | 106 | -2.53 | 0.001 |
| REACTIVE OXYGEN SPECIES METABOLIC PROCESS                                        | 193 | -2.53 | 0.001 |
| REGULATION OF CELL CYCLE G1 S PHASE TRANSITION                                   | 142 | -2.53 | 0.001 |
| POSITIVE REGULATION OF CELL CYCLE ARREST                                         | 69  | -2.52 | 0.001 |
| PROTOPORPHYRINOGEN IX BIOSYNTHETIC PROCESS                                       | 9   | -2.52 | 0.001 |
| LEUKOCYTE APOPTOTIC PROCESS                                                      | 81  | -2.52 | 0.001 |
| MAINTENANCE OF LOCATION                                                          | 258 | -2.52 | 0.001 |
| DNA UNWINDING INVOLVED IN DNA REPLICATION                                        | 15  | -2.52 | 0.001 |
| MICROTUBULE CYTOSKELETON ORGANIZATION INVOLVED IN MITOSIS                        | 114 | -2.51 | 0.001 |
| TRANSITION METAL ION HOMEOSTASIS                                                 | 92  | -2.51 | 0.001 |
| MYD88 DEPENDENT TOLL LIKE RECEPTOR SIGNALING PATHWAY                             | 31  | -2.51 | 0.001 |
| MITOTIC SPINDLE ORGANIZATION                                                     | 91  | -2.51 | 0.001 |
| O GLYCAN PROCESSING                                                              | 31  | -2.50 | 0.001 |

|                                                                |     |       |       |
|----------------------------------------------------------------|-----|-------|-------|
| RECEPTOR SIGNALING PATHWAY VIA STAT                            | 90  | -2.50 | 0.001 |
| VESICLE ORGANIZATION                                           | 285 | -2.49 | 0.001 |
| GENE SILENCING BY RNA                                          | 124 | -2.49 | 0.001 |
| TELOMERE ORGANIZATION                                          | 138 | -2.49 | 0.001 |
| PLASMA LIPOPROTEIN PARTICLE CLEARANCE                          | 42  | -2.49 | 0.001 |
| TYPE I INTERFERON PRODUCTION                                   | 111 | -2.49 | 0.001 |
| POSITIVE REGULATION OF PHOSPHORUS METABOLIC PROCESS            | 804 | -2.49 | 0.002 |
| HETEROTYPIC CELL CELL ADHESION                                 | 46  | -2.49 | 0.002 |
| INTERSPECIES INTERACTION BETWEEN ORGANISMS                     | 754 | -2.49 | 0.002 |
| REGULATION OF DNA DEPENDENT DNA REPLICATION                    | 43  | -2.48 | 0.002 |
| POSITIVE REGULATION OF INTERLEUKIN 12 PRODUCTION               | 26  | -2.48 | 0.002 |
| LIPID METABOLIC PROCESS                                        | 990 | -2.48 | 0.002 |
| REGULATION OF RESPONSE TO DNA DAMAGE STIMULUS                  | 196 | -2.48 | 0.002 |
| REGULATION OF LYMPHOCYTE DIFFERENTIATION                       | 122 | -2.48 | 0.002 |
| POSITIVE REGULATION OF ALPHA BETA T CELL PROLIFERATION         | 13  | -2.47 | 0.002 |
| HEME BIOSYNTHETIC PROCESS                                      | 19  | -2.47 | 0.002 |
| SIGNAL TRANSDUCTION BY P53 CLASS MEDIATOR                      | 240 | -2.47 | 0.002 |
| REGULATION OF MONONUCLEAR CELL MIGRATION                       | 33  | -2.47 | 0.002 |
| CYTOKINE PRODUCTION INVOLVED IN IMMUNE RESPONSE                | 71  | -2.47 | 0.002 |
| POSITIVE REGULATION OF NF KAPPAB TRANSCRIPTION FACTOR ACTIVITY | 121 | -2.47 | 0.002 |
| REGULATION OF GENE SILENCING                                   | 94  | -2.47 | 0.002 |
| NEGATIVE REGULATION OF CELL DEATH                              | 712 | -2.47 | 0.002 |
| RESPONSE TO INTERLEUKIN 4                                      | 30  | -2.47 | 0.002 |
| CENTRIOLE ASSEMBLY                                             | 33  | -2.47 | 0.002 |
| T CELL MIGRATION                                               | 46  | -2.46 | 0.002 |
| POSITIVE REGULATION OF HETEROTYPIC CELL CELL ADHESION          | 9   | -2.46 | 0.002 |

|                                                                         |     |       |       |
|-------------------------------------------------------------------------|-----|-------|-------|
| UNSATURATED FATTY ACID BIOSYNTHETIC PROCESS                             | 38  | -2.46 | 0.002 |
| NEGATIVE REGULATION OF CYTOKINE SECRETION                               | 42  | -2.46 | 0.002 |
| POSITIVE REGULATION OF PEPTIDASE ACTIVITY                               | 140 | -2.46 | 0.002 |
| PRE REPLICATIVE COMPLEX ASSEMBLY INVOLVED IN CELL CYCLE DNA REPLICATION | 7   | -2.46 | 0.002 |
| SNRNA PROCESSING                                                        | 25  | -2.46 | 0.002 |
| POSITIVE REGULATION OF MYELOID LEUKOCYTE MEDIATED IMMUNITY              | 25  | -2.46 | 0.002 |
| POSITIVE REGULATION OF INTEGRIN ACTIVATION                              | 7   | -2.45 | 0.002 |
| NADPH REGENERATION                                                      | 16  | -2.45 | 0.002 |
| NEGATIVE REGULATION OF INTERLEUKIN 1 PRODUCTION                         | 17  | -2.45 | 0.002 |
| CARBOHYDRATE DERIVATIVE CATABOLIC PROCESS                               | 142 | -2.45 | 0.002 |
| MONONUCLEAR CELL MIGRATION                                              | 48  | -2.44 | 0.002 |
| MICROTUBULE BASED PROCESS                                               | 597 | -2.44 | 0.002 |
| PROTEIN CONTAINING COMPLEX LOCALIZATION                                 | 243 | -2.44 | 0.002 |
| POSITIVE REGULATION OF LYMPHOCYTE MEDIATED IMMUNITY                     | 60  | -2.44 | 0.002 |
| GLYCOSYLATION                                                           | 193 | -2.44 | 0.002 |
| REGULATION OF NUCLEOBASE CONTAINING COMPOUND TRANSPORT                  | 16  | -2.44 | 0.002 |
| CHROMOSOME SEPARATION                                                   | 71  | -2.44 | 0.002 |
| RESPONSE TO FUNGUS                                                      | 24  | -2.43 | 0.002 |
| LYSOSOME LOCALIZATION                                                   | 63  | -2.43 | 0.002 |
| CELL PROJECTION ASSEMBLY                                                | 443 | -2.43 | 0.002 |
| CD4 POSITIVE ALPHA BETA T CELL ACTIVATION                               | 70  | -2.43 | 0.002 |
| REGULATION OF APOPTOTIC CELL CLEARANCE                                  | 7   | -2.43 | 0.002 |
| CELLULAR TRANSITION METAL ION HOMEOSTASIS                               | 74  | -2.43 | 0.002 |
| NEGATIVE REGULATION OF INTERLEUKIN 6 PRODUCTION                         | 29  | -2.42 | 0.002 |
| LOW DENSITY LIPOPROTEIN PARTICLE CLEARANCE                              | 28  | -2.42 | 0.002 |
| ACTIVATION OF INNATE IMMUNE RESPONSE                                    | 230 | -2.42 | 0.002 |
| PHAGOSOME ACIDIFICATION                                                 | 20  | -2.42 | 0.002 |

|                                                                         |     |       |       |
|-------------------------------------------------------------------------|-----|-------|-------|
| REGULATION OF RNA SPLICING                                              | 116 | -2.42 | 0.002 |
| ACTIN POLYMERIZATION OR DEPOLYMERIZATION                                | 169 | -2.42 | 0.002 |
| ORGANIC ACID BIOSYNTHETIC PROCESS                                       | 233 | -2.42 | 0.002 |
| NEGATIVE REGULATION OF LEUKOCYTE CELL CELL ADHESION                     | 83  | -2.42 | 0.002 |
| CELL CYCLE G2 M PHASE TRANSITION                                        | 240 | -2.41 | 0.002 |
| RESPONSE TO PROTOZOAN                                                   | 11  | -2.41 | 0.002 |
| POSITIVE REGULATION OF TOLL LIKE RECEPTOR SIGNALING PATHWAY             | 18  | -2.41 | 0.002 |
| POSITIVE REGULATION OF CELL CYCLE                                       | 293 | -2.41 | 0.002 |
| ANTIMICROBIAL HUMORAL IMMUNE RESPONSE MEDIATED BY ANTIMICROBIAL PEPTIDE | 15  | -2.41 | 0.002 |
| POSITIVE REGULATION OF B CELL MEDIATED IMMUNITY                         | 25  | -2.41 | 0.002 |
| REGULATION OF CHROMATIN ORGANIZATION                                    | 148 | -2.41 | 0.003 |
| DETECTION OF OTHER ORGANISM                                             | 8   | -2.40 | 0.003 |
| RESPONSE TO LIPID                                                       | 647 | -2.40 | 0.003 |
| NUCLEIC ACID PHOSPHODIESTER BOND HYDROLYSIS                             | 242 | -2.40 | 0.003 |
| REGULATION OF DNA DIRECTED DNA POLYMERASE ACTIVITY                      | 7   | -2.40 | 0.003 |
| DIVALENT INORGANIC CATION HOMEOSTASIS                                   | 316 | -2.39 | 0.003 |
| SUPEROXIDE ANION GENERATION                                             | 19  | -2.39 | 0.003 |
| TISSUE REMODELING                                                       | 127 | -2.39 | 0.003 |
| POSITIVE REGULATION OF HEMOPOIESIS                                      | 145 | -2.39 | 0.003 |
| POSITIVE REGULATION OF ALPHA BETA T CELL ACTIVATION                     | 48  | -2.39 | 0.003 |
| REGULATION OF MACROPHAGE ACTIVATION                                     | 36  | -2.39 | 0.003 |
| TRIGLYCERIDE METABOLIC PROCESS                                          | 65  | -2.39 | 0.003 |
| HUMORAL IMMUNE RESPONSE MEDIATED BY CIRCULATING IMMUNOGLOBULIN          | 25  | -2.39 | 0.003 |
| DENDRITIC CELL DIFFERENTIATION                                          | 29  | -2.39 | 0.003 |
| SIGNAL TRANSDUCTION INVOLVED IN CELLULAR RESPONSE TO AMMONIUM ION       | 40  | -2.38 | 0.003 |

|                                                                   |     |       |       |
|-------------------------------------------------------------------|-----|-------|-------|
| REGULATION OF PRODUCTION OF MOLECULAR MEDIATOR OF IMMUNE RESPONSE | 101 | -2.38 | 0.003 |
| HISTONE PHOSPHORYLATION                                           | 34  | -2.38 | 0.003 |
| REGULATION OF ESTABLISHMENT OF PROTEIN LOCALIZATION               | 563 | -2.38 | 0.003 |
| ANATOMICAL STRUCTURE HOMEOSTASIS                                  | 313 | -2.38 | 0.003 |
| COLLAGEN METABOLIC PROCESS                                        | 73  | -2.37 | 0.003 |
| MEGAKARYOCYTE DIFFERENTIATION                                     | 62  | -2.37 | 0.003 |
| RESPONSE TO ANTIBIOTIC                                            | 232 | -2.37 | 0.003 |
| NEGATIVE REGULATION OF LEUKOCYTE PROLIFERATION                    | 46  | -2.37 | 0.003 |
| POSITIVE REGULATION OF TRANSFERASE ACTIVITY                       | 514 | -2.37 | 0.003 |
| POSITIVE REGULATION OF LEUKOCYTE DEGRANULATION                    | 19  | -2.37 | 0.003 |
| NEGATIVE REGULATION OF PEPTIDE SECRETION                          | 87  | -2.37 | 0.003 |
| RESPONSE TO ALCOHOL                                               | 160 | -2.37 | 0.003 |
| REGULATION OF SYMBIOSIS ENCOMPASSING MUTUALISM THROUGH PARASITISM | 159 | -2.36 | 0.003 |
| TISSUE HOMEOSTASIS                                                | 143 | -2.36 | 0.003 |
| T CELL ACTIVATION INVOLVED IN IMMUNE RESPONSE                     | 65  | -2.36 | 0.003 |
| SYNAPSE PRUNING                                                   | 11  | -2.36 | 0.003 |
| DOPAMINE RECEPTOR SIGNALING PATHWAY                               | 28  | -2.36 | 0.003 |
| NEGATIVE REGULATION OF MULTICELLULAR ORGANISMAL PROCESS           | 839 | -2.36 | 0.003 |
| POSITIVE REGULATION OF CHEMOKINE PRODUCTION                       | 41  | -2.36 | 0.003 |
| REGULATION OF INTERLEUKIN 1 SECRETION                             | 27  | -2.36 | 0.003 |
| REGULATION OF LIPID BIOSYNTHETIC PROCESS                          | 151 | -2.36 | 0.003 |
| ENTRY INTO HOST                                                   | 96  | -2.36 | 0.003 |
| REGULATION OF INTERLEUKIN 4 PRODUCTION                            | 21  | -2.36 | 0.003 |
| REGULATION OF SUPEROXIDE ANION GENERATION                         | 15  | -2.35 | 0.003 |
| REGULATION OF MYELOID CELL DIFFERENTIATION                        | 175 | -2.35 | 0.003 |
| REGULATION OF TOLL LIKE RECEPTOR 2 SIGNALING PATHWAY              | 7   | -2.35 | 0.004 |

|                                                               |     |       |       |
|---------------------------------------------------------------|-----|-------|-------|
| NUCLEOBASE CONTAINING SMALL MOLECULE METABOLIC PROCESS        | 488 | -2.35 | 0.004 |
| RESPONSE TO ZINC ION                                          | 26  | -2.34 | 0.004 |
| MRNA CLEAVAGE                                                 | 20  | -2.34 | 0.004 |
| POSITIVE T CELL SELECTION                                     | 22  | -2.33 | 0.004 |
| REGULATION OF TOLL LIKE RECEPTOR 4 SIGNALING PATHWAY          | 13  | -2.33 | 0.004 |
| VIRAL LIFE CYCLE                                              | 244 | -2.33 | 0.004 |
| NEGATIVE REGULATION OF CYSTEINE TYPE ENDOPEPTIDASE ACTIVITY   | 66  | -2.33 | 0.004 |
| INTEGRIN ACTIVATION                                           | 21  | -2.33 | 0.004 |
| ALTERNATIVE MRNA SPLICING VIA SPLICEOSOME                     | 67  | -2.33 | 0.004 |
| SEROTONIN TRANSPORT                                           | 9   | -2.33 | 0.004 |
| MEGAKARYOCYTE DEVELOPMENT                                     | 16  | -2.32 | 0.004 |
| REGULATION OF CHROMOSOME SEGREGATION                          | 83  | -2.32 | 0.004 |
| SISTER CHROMATID COHESION                                     | 47  | -2.31 | 0.005 |
| RESPONSE TO NUTRIENT                                          | 156 | -2.31 | 0.005 |
| REGULATION OF MRNA METABOLIC PROCESS                          | 280 | -2.31 | 0.005 |
| REGULATION OF PLASMA LIPOPROTEIN PARTICLE LEVELS              | 66  | -2.31 | 0.005 |
| TOLL LIKE RECEPTOR 2 SIGNALING PATHWAY                        | 12  | -2.31 | 0.005 |
| ALPHA BETA T CELL DIFFERENTIATION                             | 75  | -2.31 | 0.005 |
| PH REDUCTION                                                  | 41  | -2.31 | 0.005 |
| NEGATIVE REGULATION OF PEPTIDASE ACTIVITY                     | 141 | -2.31 | 0.005 |
| NEGATIVE REGULATION OF CELL CYCLE PROCESS                     | 281 | -2.31 | 0.005 |
| REGULATION OF CELL CYCLE ARREST                               | 90  | -2.31 | 0.005 |
| POSITIVE REGULATION OF TOLL LIKE RECEPTOR 4 SIGNALING PATHWAY | 6   | -2.30 | 0.005 |
| NUCLEOTIDE SUGAR METABOLIC PROCESS                            | 34  | -2.30 | 0.005 |
| NEGATIVE REGULATION OF INFLAMMATORY RESPONSE                  | 96  | -2.30 | 0.005 |
| STEROL METABOLIC PROCESS                                      | 110 | -2.30 | 0.005 |
| NEGATIVE REGULATION OF CELL CYCLE                             | 513 | -2.29 | 0.005 |
| FATTY ACID DERIVATIVE BIOSYNTHETIC PROCESS                    | 69  | -2.29 | 0.005 |

|                                                                               |     |       |       |
|-------------------------------------------------------------------------------|-----|-------|-------|
| DNA REPLICATION SYNTHESIS OF RNA PRIMER                                       | 5   | -2.29 | 0.005 |
| REGULATION OF CYTOKINE PRODUCTION INVOLVED IN IMMUNE RESPONSE                 | 59  | -2.29 | 0.005 |
| POSITIVE REGULATION OF INTERLEUKIN 1 SECRETION                                | 18  | -2.29 | 0.005 |
| REGULATION OF SISTER CHROMATID SEGREGATION                                    | 68  | -2.29 | 0.005 |
| REGULATION OF TRANSCRIPTION INVOLVED IN G1 S TRANSITION OF MITOTIC CELL CYCLE | 20  | -2.29 | 0.005 |
| NEGATIVE REGULATION OF BONE REMODELING                                        | 10  | -2.29 | 0.005 |
| OOCYTE MATURATION                                                             | 16  | -2.29 | 0.005 |
| POSITIVE REGULATION OF PRODUCTION OF MOLECULAR MEDIATOR OF IMMUNE RESPONSE    | 68  | -2.29 | 0.005 |
| REGULATION OF LYMPHOCYTE APOPTOTIC PROCESS                                    | 41  | -2.28 | 0.006 |
| DEFENSE RESPONSE TO GRAM POSITIVE BACTERIUM                                   | 34  | -2.28 | 0.006 |
| POSITIVE REGULATION OF I KAPPAB KINASE NF KAPPAB SIGNALING                    | 152 | -2.28 | 0.006 |
| RESPONSE TO FATTY ACID                                                        | 61  | -2.28 | 0.006 |
| DEFENSE RESPONSE TO FUNGUS                                                    | 14  | -2.28 | 0.006 |
| PHOSPHOLIPID BIOSYNTHETIC PROCESS                                             | 218 | -2.28 | 0.006 |
| NEGATIVE REGULATION OF B CELL ACTIVATION                                      | 26  | -2.28 | 0.006 |
| CARBOHYDRATE METABOLIC PROCESS                                                | 457 | -2.28 | 0.006 |
| RESPONSE TO INORGANIC SUBSTANCE                                               | 394 | -2.28 | 0.006 |
| REGULATION OF DOUBLE STRAND BREAK REPAIR                                      | 69  | -2.27 | 0.006 |
| CD4 POSITIVE ALPHA BETA T CELL DIFFERENTIATION                                | 58  | -2.27 | 0.006 |
| CARBOHYDRATE DERIVATIVE BIOSYNTHETIC PROCESS                                  | 520 | -2.27 | 0.006 |
| NEGATIVE REGULATION OF CELL CELL ADHESION                                     | 127 | -2.27 | 0.006 |
| REGULATION OF T CELL DIFFERENTIATION                                          | 98  | -2.27 | 0.006 |
| RESPONSE TO BACTERIAL LIPOPROTEIN                                             | 7   | -2.27 | 0.006 |
| POSITIVE REGULATION OF TUMOR NECROSIS FACTOR BIOSYNTHETIC PROCESS             | 15  | -2.27 | 0.006 |
| GLUCOSE 6 PHOSPHATE METABOLIC PROCESS                                         | 20  | -2.27 | 0.006 |

|                                                            |     |       |       |
|------------------------------------------------------------|-----|-------|-------|
| POSITIVE REGULATION OF INTERFERON GAMMA SECRETION          | 6   | -2.27 | 0.006 |
| SNRNA TRANSCRIPTION                                        | 69  | -2.27 | 0.006 |
| POSITIVE REGULATION OF INTERLEUKIN 8 BIOSYNTHETIC PROCESS  | 7   | -2.26 | 0.006 |
| REGULATION OF ACUTE INFLAMMATORY RESPONSE                  | 26  | -2.26 | 0.006 |
| TOOTH ERUPTION                                             | 5   | -2.26 | 0.006 |
| POSITIVE REGULATION OF MONOCYTE CHEMOTAXIS                 | 11  | -2.26 | 0.006 |
| HOMOLOGOUS RECOMBINATION                                   | 32  | -2.26 | 0.006 |
| NEUTRAL LIPID METABOLIC PROCESS                            | 82  | -2.26 | 0.006 |
| NATURAL KILLER CELL ACTIVATION INVOLVED IN IMMUNE RESPONSE | 8   | -2.26 | 0.006 |
| MEIOTIC CHROMOSOME CONDENSATION                            | 6   | -2.25 | 0.007 |
| NEGATIVE REGULATION OF MITOTIC CELL CYCLE                  | 274 | -2.25 | 0.007 |
| DNA TEMPLATED TRANSCRIPTION TERMINATION                    | 71  | -2.25 | 0.007 |
| DEFENSE RESPONSE TO GRAM NEGATIVE BACTERIUM                | 29  | -2.25 | 0.007 |
| MAINTENANCE OF DNA METHYLATION                             | 6   | -2.25 | 0.007 |
| REGULATION OF DNA RECOMBINATION                            | 78  | -2.25 | 0.007 |
| INTERFERON GAMMA SECRETION                                 | 11  | -2.25 | 0.007 |
| RESPONSE TO ETHANOL                                        | 83  | -2.25 | 0.007 |
| CELLULAR RESPONSE TO DRUG                                  | 297 | -2.25 | 0.007 |
| RESPONSE TO RADIATION                                      | 327 | -2.25 | 0.007 |
| INTERLEUKIN 4 MEDIATED SIGNALING PATHWAY                   | 7   | -2.24 | 0.007 |
| HYALURONAN METABOLIC PROCESS                               | 31  | -2.24 | 0.007 |
| REGULATION OF CELL KILLING                                 | 48  | -2.24 | 0.007 |
| LYMPHOCYTE MIGRATION                                       | 64  | -2.24 | 0.007 |
| POSITIVE REGULATION OF PEPTIDYL TYROSINE PHOSPHORYLATION   | 137 | -2.23 | 0.007 |
| KINETOCHORE ORGANIZATION                                   | 14  | -2.23 | 0.008 |
| IRON ION HOMEOSTASIS                                       | 63  | -2.23 | 0.008 |
| REGULATION OF ISOMERASE ACTIVITY                           | 7   | -2.23 | 0.008 |
| RESPONSE TO AMMONIUM ION                                   | 97  | -2.23 | 0.008 |

|                                                             |     |       |       |
|-------------------------------------------------------------|-----|-------|-------|
| REGULATION OF HETEROTYPIC CELL CELL ADHESION                | 18  | -2.22 | 0.008 |
| NEGATIVE REGULATION OF GENE EXPRESSION EPIGENETIC           | 71  | -2.22 | 0.008 |
| EXTRACELLULAR MATRIX DISASSEMBLY                            | 52  | -2.22 | 0.008 |
| MATURE B CELL DIFFERENTIATION INVOLVED IN IMMUNE RESPONSE   | 16  | -2.22 | 0.008 |
| INTERLEUKIN 4 PRODUCTION                                    | 25  | -2.22 | 0.008 |
| MONOCYTE CHEMOTACTIC PROTEIN 1 PRODUCTION                   | 12  | -2.22 | 0.008 |
| REGULATION OF COAGULATION                                   | 57  | -2.22 | 0.008 |
| MITOTIC DNA REPLICATION                                     | 13  | -2.22 | 0.008 |
| TOLL LIKE RECEPTOR 3 SIGNALING PATHWAY                      | 17  | -2.22 | 0.008 |
| CELLULAR RESPONSE TO NITROGEN COMPOUND                      | 512 | -2.21 | 0.009 |
| POSITIVE REGULATION OF MONONUCLEAR CELL MIGRATION           | 15  | -2.21 | 0.009 |
| NEGATIVE REGULATION OF MRNA METABOLIC PROCESS               | 69  | -2.21 | 0.009 |
| CERAMIDE BIOSYNTHETIC PROCESS                               | 47  | -2.21 | 0.009 |
| REGULATION OF CHOLESTEROL METABOLIC PROCESS                 | 48  | -2.20 | 0.009 |
| INTERLEUKIN 1 SECRETION                                     | 32  | -2.20 | 0.009 |
| NEGATIVE REGULATION OF LIPOPROTEIN PARTICLE CLEARANCE       | 6   | -2.20 | 0.009 |
| ACTIN FILAMENT POLYMERIZATION                               | 145 | -2.20 | 0.010 |
| NEGATIVE REGULATION OF TOLL LIKE RECEPTOR SIGNALING PATHWAY | 30  | -2.19 | 0.010 |
| REGULATION OF MONOCYTE CHEMOTAXIS                           | 16  | -2.19 | 0.010 |
| REGULATION OF CELLULAR EXTRAVASATION                        | 26  | -2.19 | 0.010 |
| GLYCOLIPID CATABOLIC PROCESS                                | 12  | -2.19 | 0.010 |
| REGULATION OF CENTROSOME DUPLICATION                        | 36  | -2.19 | 0.010 |
| POSITIVE REGULATION OF INTERLEUKIN 2 BIOSYNTHETIC PROCESS   | 10  | -2.19 | 0.010 |
| REGULATION OF DNA METABOLIC PROCESS                         | 295 | -2.19 | 0.010 |
| CELLULAR RESPONSE TO TOXIC SUBSTANCE                        | 179 | -2.18 | 0.010 |

|                                                       |     |       |       |
|-------------------------------------------------------|-----|-------|-------|
| REGULATION OF PROTEIN TYROSINE PHOSPHATASE ACTIVITY   | 6   | -2.18 | 0.010 |
| DETECTION OF STIMULUS                                 | 141 | -2.18 | 0.010 |
| PHAGOSOME MATURATION                                  | 36  | -2.18 | 0.011 |
| CHROMOSOME CONDENSATION                               | 27  | -2.18 | 0.011 |
| CLATHRIN COAT ASSEMBLY                                | 16  | -2.18 | 0.011 |
| CERAMIDE CATABOLIC PROCESS                            | 14  | -2.18 | 0.011 |
| REGULATION OF INOSITOL PHOSPHATE BIOSYNTHETIC PROCESS | 11  | -2.18 | 0.011 |
| RNA PHOSPHODIESTER BOND HYDROLYSIS EXONUCLEOLYTIC     | 42  | -2.18 | 0.011 |
| TRANSFERRIN TRANSPORT                                 | 27  | -2.17 | 0.011 |
| SERINE FAMILY AMINO ACID METABOLIC PROCESS            | 26  | -2.17 | 0.011 |
| REGULATION OF INTERFERON GAMMA SECRETION              | 7   | -2.17 | 0.011 |
| POSITIVE REGULATION OF LEUKOCYTE DIFFERENTIATION      | 114 | -2.17 | 0.011 |
| REGULATION OF REGULATED SECRETORY PATHWAY             | 108 | -2.17 | 0.011 |
| POSITIVE REGULATION OF INTERLEUKIN 4 PRODUCTION       | 17  | -2.17 | 0.011 |
| CALMODULIN DEPENDENT KINASE SIGNALING PATHWAY         | 6   | -2.17 | 0.011 |
| ANION TRANSPORT                                       | 390 | -2.17 | 0.011 |
| RESPONSE TO EXTRACELLULAR STIMULUS                    | 378 | -2.17 | 0.011 |
| NEGATIVE REGULATION OF B CELL PROLIFERATION           | 12  | -2.16 | 0.011 |
| POSITIVE REGULATION OF INTERLEUKIN 8 SECRETION        | 10  | -2.16 | 0.012 |
| RESPONSE TO METHYLMERCURY                             | 6   | -2.16 | 0.012 |
| LEUKOCYTE ADHESION TO VASCULAR ENDOTHELIAL CELL       | 31  | -2.16 | 0.012 |
| NEGATIVE REGULATION OF MULTI ORGANISM PROCESS         | 129 | -2.16 | 0.012 |
| REGULATION OF GTPASE ACTIVITY                         | 366 | -2.16 | 0.012 |
| REGULATION OF ANTIGEN PROCESSING AND PRESENTATION     | 15  | -2.15 | 0.012 |
| ESTABLISHMENT OF ORGANELLE LOCALIZATION               | 341 | -2.15 | 0.012 |

|                                                                                  |     |       |       |
|----------------------------------------------------------------------------------|-----|-------|-------|
| REGULATION OF SIGNAL TRANSDUCTION BY P53 CLASS MEDIATOR                          | 165 | -2.15 | 0.012 |
| RESPONSE TO CHEMOKINE                                                            | 46  | -2.15 | 0.012 |
| POSITIVE REGULATION OF ERK1 AND ERK2 CASCADE                                     | 118 | -2.15 | 0.012 |
| FATTY ACYL COA METABOLIC PROCESS                                                 | 34  | -2.15 | 0.013 |
| ERK1 AND ERK2 CASCADE                                                            | 192 | -2.15 | 0.013 |
| NEGATIVE REGULATION OF IMMUNE EFFECTOR PROCESS                                   | 84  | -2.15 | 0.013 |
| POSITIVE REGULATION OF VASCULAR ENDOTHELIAL GROWTH FACTOR PRODUCTION             | 20  | -2.14 | 0.013 |
| LIPOXYGENASE PATHWAY                                                             | 9   | -2.14 | 0.013 |
| TAXIS                                                                            | 424 | -2.14 | 0.013 |
| DRUG CATABOLIC PROCESS                                                           | 68  | -2.14 | 0.013 |
| NEGATIVE REGULATION OF PLATELET DERIVED GROWTH FACTOR RECEPTOR SIGNALING PATHWAY | 11  | -2.14 | 0.013 |
| MACROPHAGE DIFFERENTIATION                                                       | 38  | -2.14 | 0.013 |
| CELLULAR RESPONSE TO CISPLATIN                                                   | 6   | -2.14 | 0.013 |
| NEGATIVE REGULATION OF PHAGOCYTOSIS                                              | 18  | -2.14 | 0.013 |
| T CELL SELECTION                                                                 | 31  | -2.14 | 0.013 |
| FATTY ACYL COA BIOSYNTHETIC PROCESS                                              | 27  | -2.14 | 0.013 |
| CELLULAR RESPONSE TO FATTY ACID                                                  | 40  | -2.14 | 0.013 |
| POSITIVE REGULATION OF MONOCYTE CHEMOTACTIC PROTEIN 1 PRODUCTION                 | 8   | -2.14 | 0.013 |
| NEGATIVE REGULATION OF TROPHOBLAST CELL MIGRATION                                | 6   | -2.13 | 0.013 |
| REGULATION OF PLATELET DERIVED GROWTH FACTOR RECEPTOR SIGNALING PATHWAY          | 20  | -2.13 | 0.013 |
| VASCULAR ENDOTHELIAL GROWTH FACTOR PRODUCTION                                    | 25  | -2.13 | 0.013 |
| COLLAGEN BIOSYNTHETIC PROCESS                                                    | 33  | -2.13 | 0.013 |
| DEOXYRIBONUCLEOTIDE METABOLIC PROCESS                                            | 31  | -2.13 | 0.014 |
| REGULATION OF STEROID BIOSYNTHETIC PROCESS                                       | 70  | -2.13 | 0.014 |
| AMYLOID BETA CLEARANCE                                                           | 29  | -2.13 | 0.014 |
| REGULATION OF B CELL DIFFERENTIATION                                             | 23  | -2.13 | 0.014 |

|                                                                |     |       |       |
|----------------------------------------------------------------|-----|-------|-------|
| RESPONSE TO VITAMIN E                                          | 9   | -2.13 | 0.014 |
| PROTEIN LOCALIZATION TO KINETOCHORE                            | 14  | -2.12 | 0.014 |
| PENTOSE PHOSPHATE SHUNT NON OXIDATIVE BRANCH                   | 5   | -2.12 | 0.014 |
| POSITIVE REGULATION OF B CELL PROLIFERATION                    | 34  | -2.12 | 0.014 |
| REGULATION OF DNA REPLICATION                                  | 91  | -2.12 | 0.014 |
| MARGINAL ZONE B CELL DIFFERENTIATION                           | 8   | -2.12 | 0.014 |
| POLYOL METABOLIC PROCESS                                       | 94  | -2.12 | 0.014 |
| MUCOPOLYSACCHARIDE METABOLIC PROCESS                           | 93  | -2.12 | 0.014 |
| LIPOSACCHARIDE METABOLIC PROCESS                               | 92  | -2.12 | 0.015 |
| PROTEIN LOCALIZATION TO CHROMOSOME CENTROMERIC REGION          | 17  | -2.11 | 0.015 |
| GLYCEROLIPID METABOLIC PROCESS                                 | 314 | -2.11 | 0.015 |
| LOW DENSITY LIPOPROTEIN RECEPTOR PARTICLE METABOLIC PROCESS    | 21  | -2.11 | 0.015 |
| AMINOGLYCAN CATABOLIC PROCESS                                  | 49  | -2.11 | 0.015 |
| SERINE FAMILY AMINO ACID BIOSYNTHETIC PROCESS                  | 13  | -2.11 | 0.015 |
| DETERMINATION OF ADULT LIFESPAN                                | 13  | -2.11 | 0.015 |
| RESPONSE TO PEPTIDE                                            | 394 | -2.11 | 0.015 |
| NEGATIVE REGULATION OF RESPONSE TO EXTERNAL STIMULUS           | 250 | -2.11 | 0.015 |
| REGULATION OF PROTEIN LOCALIZATION                             | 771 | -2.11 | 0.015 |
| DENDRITIC CELL MIGRATION                                       | 19  | -2.11 | 0.015 |
| GROWTH HORMONE RECEPTOR SIGNALING PATHWAY VIA JAK STAT         | 9   | -2.11 | 0.015 |
| CHROMATIN ORGANIZATION INVOLVED IN REGULATION OF TRANSCRIPTION | 67  | -2.11 | 0.015 |
| TERMINATION OF RNA POLYMERASE II TRANSCRIPTION                 | 35  | -2.11 | 0.015 |
| NEGATIVE REGULATION OF CELL ADHESION                           | 208 | -2.11 | 0.016 |
| COPPER ION TRANSMEMBRANE TRANSPORT                             | 6   | -2.11 | 0.016 |
| POSITIVE REGULATION OF KINASE ACTIVITY                         | 449 | -2.10 | 0.016 |
| MONOCYTE CHEMOTAXIS                                            | 28  | -2.10 | 0.016 |

|                                                          |     |       |       |
|----------------------------------------------------------|-----|-------|-------|
| POSITIVE REGULATION OF CELLULAR EXTRAVASATION            | 16  | -2.10 | 0.016 |
| REGULATION OF RESPONSE TO CYTOKINE STIMULUS              | 134 | -2.10 | 0.016 |
| POSITIVE REGULATION OF INTERFERON ALPHA PRODUCTION       | 19  | -2.10 | 0.016 |
| RESPONSE TO MACROPHAGE COLONY STIMULATING FACTOR         | 10  | -2.10 | 0.016 |
| SNRNA METABOLIC PROCESS                                  | 34  | -2.10 | 0.016 |
| STEROID CATABOLIC PROCESS                                | 12  | -2.10 | 0.016 |
| POSITIVE REGULATION OF PROTEIN MODIFICATION PROCESS      | 900 | -2.09 | 0.016 |
| REGULATION OF DEFENSE RESPONSE TO VIRUS BY VIRUS         | 26  | -2.09 | 0.016 |
| CYSTEINE METABOLIC PROCESS                               | 9   | -2.09 | 0.016 |
| POSITIVE REGULATION OF INTRACELLULAR SIGNAL TRANSDUCTION | 731 | -2.09 | 0.016 |
| MULTICELLULAR ORGANISMAL HOMEOSTASIS                     | 334 | -2.09 | 0.016 |
| RESPONSE TO IRON ION                                     | 24  | -2.09 | 0.016 |
| REGULATION OF T CELL MIGRATION                           | 32  | -2.09 | 0.017 |
| REGULATION OF RECEPTOR SIGNALING PATHWAY VIA STAT        | 75  | -2.09 | 0.017 |
| PROTEIN FOLDING IN ENDOPLASMIC RETICULUM                 | 9   | -2.09 | 0.017 |
| RESPONSE TO IONIZING RADIATION                           | 128 | -2.08 | 0.017 |
| REGULATION OF CHOLESTEROL BIOSYNTHETIC PROCESS           | 38  | -2.08 | 0.017 |
| NEGATIVE REGULATION OF DNA REPLICATION                   | 30  | -2.08 | 0.018 |
| REGULATION OF CELLULAR RESPONSE TO STRESS                | 606 | -2.08 | 0.018 |
| REGULATION OF CENTROSOME CYCLE                           | 50  | -2.08 | 0.018 |
| CELLULAR RESPONSE TO IRON ION                            | 8   | -2.08 | 0.018 |
| ORGANIC ANION TRANSPORT                                  | 314 | -2.08 | 0.018 |
| CILIUM ORGANIZATION                                      | 284 | -2.08 | 0.018 |
| NEUTRAL AMINO ACID TRANSPORT                             | 27  | -2.08 | 0.018 |
| ACTIVATION OF GTPASE ACTIVITY                            | 69  | -2.08 | 0.018 |
| RESPONSE TO METAL ION                                    | 249 | -2.08 | 0.018 |

|                                                     |     |       |       |
|-----------------------------------------------------|-----|-------|-------|
| NEGATIVE REGULATION OF MAST CELL ACTIVATION         | 10  | -2.07 | 0.018 |
| PIGMENT GRANULE ORGANIZATION                        | 24  | -2.07 | 0.019 |
| REGULATION OF MEGAKARYOCYTE DIFFERENTIATION         | 45  | -2.07 | 0.019 |
| EXTRACELLULAR STRUCTURE ORGANIZATION                | 286 | -2.07 | 0.019 |
| POSITIVE REGULATION OF INTERLEUKIN 1 PRODUCTION     | 29  | -2.07 | 0.019 |
| REGULATION OF LYMPHOCYTE MIGRATION                  | 42  | -2.07 | 0.019 |
| RESPONSE TO MECHANICAL STIMULUS                     | 156 | -2.06 | 0.019 |
| NEGATIVE REGULATION OF CELL CYCLE PHASE TRANSITION  | 212 | -2.06 | 0.019 |
| APOPTOTIC CELL CLEARANCE                            | 39  | -2.06 | 0.019 |
| SNRNA 3 END PROCESSING                              | 19  | -2.06 | 0.020 |
| MONOVALENT INORGANIC ANION HOMEOSTASIS              | 14  | -2.06 | 0.020 |
| NEUTROPHIL HOMEOSTASIS                              | 14  | -2.06 | 0.020 |
| POSITIVE REGULATION OF MYELOID CELL DIFFERENTIATION | 69  | -2.06 | 0.020 |
| GLYCEROLIPID CATABOLIC PROCESS                      | 40  | -2.06 | 0.020 |
| POSITIVE REGULATION OF CELL DEATH                   | 547 | -2.06 | 0.020 |
| KILLING OF CELLS OF OTHER ORGANISM                  | 19  | -2.06 | 0.020 |
| REGULATION OF DNA REPAIR                            | 109 | -2.06 | 0.020 |
| REGULATION OF POSTTRANSCRIPTIONAL GENE SILENCING    | 74  | -2.06 | 0.020 |
| CHEMOKINE BIOSYNTHETIC PROCESS                      | 11  | -2.06 | 0.020 |
| INTERACTION WITH SYMBIONT                           | 55  | -2.06 | 0.020 |
| NUCLEOTIDE SUGAR BIOSYNTHETIC PROCESS               | 21  | -2.05 | 0.020 |
| POSITIVE REGULATION OF CHROMOSOME ORGANIZATION      | 151 | -2.05 | 0.020 |
| RESPONSE TO LEUKEMIA INHIBITORY FACTOR              | 82  | -2.05 | 0.020 |
| DEOXYRIBOSE PHOSPHATE CATABOLIC PROCESS             | 20  | -2.05 | 0.020 |
| TETRAPYRROLE METABOLIC PROCESS                      | 40  | -2.05 | 0.021 |
| T HELPER 1 TYPE IMMUNE RESPONSE                     | 31  | -2.05 | 0.021 |
| NEGATIVE REGULATION OF ALPHA BETA T CELL ACTIVATION | 28  | -2.05 | 0.021 |

|                                                                                |     |       |       |
|--------------------------------------------------------------------------------|-----|-------|-------|
| REGULATION OF NUCLEAR DIVISION                                                 | 144 | -2.05 | 0.021 |
| REGULATION OF PEPTIDYL TYROSINE PHOSPHORYLATION                                | 192 | -2.05 | 0.021 |
| TETRAPYRROLE BIOSYNTHETIC PROCESS                                              | 25  | -2.04 | 0.022 |
| NEGATIVE REGULATION OF VIRAL PROCESS                                           | 56  | -2.04 | 0.022 |
| INTERFERON ALPHA PRODUCTION                                                    | 23  | -2.04 | 0.022 |
| POSITIVE REGULATION OF LEUKOCYTE CHEMOTAXIS                                    | 63  | -2.04 | 0.022 |
| REGULATION OF B CELL MEDIATED IMMUNITY                                         | 37  | -2.04 | 0.022 |
| COLLAGEN ACTIVATED SIGNALING PATHWAY                                           | 14  | -2.04 | 0.022 |
| GLYCOSYLCERAMIDE CATABOLIC PROCESS                                             | 7   | -2.04 | 0.022 |
| L SERINE METABOLIC PROCESS                                                     | 9   | -2.04 | 0.022 |
| NATURAL KILLER CELL DEGRANULATION                                              | 6   | -2.04 | 0.022 |
| POSITIVE REGULATION OF INTERLEUKIN 10 PRODUCTION                               | 23  | -2.04 | 0.022 |
| CELLULAR RESPONSE TO LIPOPROTEIN PARTICLE STIMULUS                             | 26  | -2.04 | 0.022 |
| NEGATIVE REGULATION OF MAST CELL DEGRANULATION                                 | 5   | -2.03 | 0.022 |
| MATURE B CELL DIFFERENTIATION                                                  | 21  | -2.03 | 0.022 |
| LIPOPOLYSACCHARIDE MEDIATED SIGNALING PATHWAY                                  | 43  | -2.03 | 0.022 |
| ANTIGEN RECEPTOR MEDIATED SIGNALING PATHWAY                                    | 181 | -2.03 | 0.022 |
| POSITIVE REGULATION OF DNA BINDING TRANSCRIPTION FACTOR ACTIVITY               | 195 | -2.03 | 0.022 |
| REGULATION OF EXTRINSIC APOPTOTIC SIGNALING PATHWAY VIA DEATH DOMAIN RECEPTORS | 45  | -2.03 | 0.023 |
| POSITIVE REGULATION OF TYROSINE PHOSPHORYLATION OF STAT PROTEIN                | 38  | -2.03 | 0.023 |
| TOLERANCE INDUCTION                                                            | 11  | -2.03 | 0.023 |
| ORGANIC HYDROXY COMPOUND TRANSPORT                                             | 137 | -2.03 | 0.023 |
| REGULATION OF CD4 POSITIVE ALPHA BETA T CELL ACTIVATION                        | 46  | -2.03 | 0.023 |
| INTERACTION WITH HOST                                                          | 158 | -2.02 | 0.024 |
| POSITIVE THYMIC T CELL SELECTION                                               | 10  | -2.02 | 0.024 |

|                                                                              |    |       |       |
|------------------------------------------------------------------------------|----|-------|-------|
| RESPONSE TO HYDROPEROXIDE                                                    | 17 | -2.02 | 0.024 |
| MRNA CLEAVAGE INVOLVED IN MRNA PROCESSING                                    | 12 | -2.02 | 0.024 |
| MYELOID DENDRITIC CELL ACTIVATION                                            | 16 | -2.02 | 0.024 |
| NEGATIVE REGULATION OF INTERLEUKIN 12 PRODUCTION                             | 10 | -2.02 | 0.024 |
| MULTI ORGANISM MEMBRANE ORGANIZATION                                         | 9  | -2.02 | 0.024 |
| IMMUNOGLOBULIN PRODUCTION                                                    | 78 | -2.02 | 0.024 |
| G PROTEIN COUPLED ACETYLCHOLINE RECEPTOR SIGNALING PATHWAY                   | 12 | -2.02 | 0.024 |
| HOMOLOGOUS CHROMOSOME SEGREGATION                                            | 24 | -2.02 | 0.024 |
| NEGATIVE REGULATION OF SPHINGOLIPID BIOSYNTHETIC PROCESS                     | 5  | -2.02 | 0.024 |
| REGULATION OF GLIAL CELL MIGRATION                                           | 13 | -2.02 | 0.024 |
| REGULATION OF ANTIGEN RECEPTOR MEDIATED SIGNALING PATHWAY                    | 45 | -2.02 | 0.024 |
| L AMINO ACID TRANSPORT                                                       | 46 | -2.02 | 0.024 |
| POSITIVE REGULATION OF MAST CELL ACTIVATION INVOLVED IN IMMUNE RESPONSE      | 12 | -2.02 | 0.024 |
| GLYCINE TRANSPORT                                                            | 6  | -2.02 | 0.024 |
| REGULATION OF PLATELET DERIVED GROWTH FACTOR RECEPTOR BETA SIGNALING PATHWAY | 7  | -2.01 | 0.024 |
| REGULATION OF GRANULOCYTE DIFFERENTIATION                                    | 14 | -2.01 | 0.024 |
| NEUROTRANSMITTER UPTAKE                                                      | 26 | -2.01 | 0.025 |
| POSITIVE REGULATION OF LYMPHOCYTE DIFFERENTIATION                            | 72 | -2.01 | 0.025 |
| SKIN MORPHOGENESIS                                                           | 7  | -2.01 | 0.025 |
| REGULATION OF LEUKOCYTE MEDIATED CYTOTOXICITY                                | 37 | -2.01 | 0.025 |
| SEROTONIN UPTAKE                                                             | 5  | -2.01 | 0.025 |
| SPHINGOID BIOSYNTHETIC PROCESS                                               | 9  | -2.01 | 0.025 |
| REGULATION OF SPINDLE ASSEMBLY                                               | 24 | -2.01 | 0.025 |
| ADENYLATE CYCLASE ACTIVATING DOPAMINE RECEPTOR SIGNALING PATHWAY             | 5  | -2.01 | 0.025 |
| POSITIVE REGULATION OF CHROMATIN ORGANIZATION                                | 89 | -2.01 | 0.026 |

|                                                         |     |       |       |
|---------------------------------------------------------|-----|-------|-------|
| INTERSTRAND CROSS LINK REPAIR                           | 46  | -2.01 | 0.026 |
| REGULATION OF NUCLEOCYTOPLASMIC TRANSPORT               | 95  | -2.01 | 0.026 |
| PHOSPHATIDYLINOSITOL BIOSYNTHETIC PROCESS               | 103 | -2.00 | 0.026 |
| PROTEIN ACETYLATION                                     | 172 | -2.00 | 0.026 |
| RESPONSE TO ANTINEOPLASTIC AGENT                        | 76  | -2.00 | 0.026 |
| REGULATION OF CARBOHYDRATE METABOLIC PROCESS            | 171 | -2.00 | 0.026 |
| POSITIVE REGULATION OF CELL CYCLE G2 M PHASE TRANSITION | 27  | -2.00 | 0.026 |
| PIGMENT ACCUMULATION                                    | 12  | -2.00 | 0.026 |
| MEMBRANE INVAGINATION                                   | 61  | -2.00 | 0.026 |
| LEUKOCYTE AGGREGATION                                   | 12  | -1.99 | 0.027 |
| UDP N ACETYLGLUCOSAMINE METABOLIC PROCESS               | 14  | -1.99 | 0.027 |
| METAPHASE ANAPHASE TRANSITION OF CELL CYCLE             | 47  | -1.99 | 0.027 |
| INTERLEUKIN 2 BIOSYNTHETIC PROCESS                      | 17  | -1.99 | 0.027 |
| CARBOHYDRATE DERIVATIVE TRANSPORT                       | 53  | -1.99 | 0.027 |
| PROTEIN LOCALIZATION TO CHROMOSOME                      | 72  | -1.99 | 0.027 |
| MANGANESE ION TRANSMEMBRANE TRANSPORT                   | 5   | -1.99 | 0.027 |
| PEPTIDYL ASPARAGINE MODIFICATION                        | 29  | -1.99 | 0.027 |
| CERAMIDE METABOLIC PROCESS                              | 67  | -1.99 | 0.027 |
| ACYLGLYCEROL HOMEOSTASIS                                | 21  | -1.99 | 0.027 |
| MEMBRANE LIPID BIOSYNTHETIC PROCESS                     | 112 | -1.99 | 0.028 |
| REGULATION OF PLATELET ACTIVATION                       | 26  | -1.99 | 0.028 |
| UNSATURATED FATTY ACID METABOLIC PROCESS                | 57  | -1.99 | 0.028 |
| POSITIVE REGULATION OF MAPK CASCADE                     | 369 | -1.99 | 0.028 |
| CLATHRIN DEPENDENT ENDOCYTOSIS                          | 39  | -1.99 | 0.028 |
| POSITIVE REGULATION OF NIK NF KAPPAB SIGNALING          | 59  | -1.99 | 0.028 |
| NEGATIVE REGULATION OF MRNA PROCESSING                  | 29  | -1.99 | 0.028 |
| REGULATION OF CYCLIN DEPENDENT PROTEIN KINASE ACTIVITY  | 84  | -1.98 | 0.028 |

|                                                                    |     |       |       |
|--------------------------------------------------------------------|-----|-------|-------|
| T CELL DIFFERENTIATION INVOLVED IN IMMUNE RESPONSE                 | 51  | -1.98 | 0.028 |
| INFLAMMATORY RESPONSE TO WOUNDING                                  | 8   | -1.98 | 0.028 |
| G QUADRUPLEX DNA UNWINDING                                         | 7   | -1.98 | 0.029 |
| POSITIVE REGULATION OF AMYLOID BETA CLEARANCE                      | 6   | -1.98 | 0.029 |
| COPPER ION TRANSPORT                                               | 12  | -1.98 | 0.029 |
| V D J RECOMBINATION                                                | 12  | -1.98 | 0.029 |
| PEPTIDYL TYROSINE MODIFICATION                                     | 281 | -1.98 | 0.029 |
| POSITIVE REGULATION OF LIPID LOCALIZATION                          | 56  | -1.98 | 0.029 |
| AGING                                                              | 233 | -1.97 | 0.030 |
| REGULATION OF SPINDLE ORGANIZATION                                 | 37  | -1.97 | 0.030 |
| NEGATIVE REGULATION OF CERAMIDE BIOSYNTHETIC PROCESS               | 5   | -1.97 | 0.030 |
| PYRIMIDINE DEOXYRIBONUCLEOTIDE METABOLIC PROCESS                   | 19  | -1.97 | 0.031 |
| PROTEIN LOCALIZATION TO CELL CORTEX                                | 11  | -1.97 | 0.031 |
| CELLULAR RESPONSE TO PROSTAGLANDIN STIMULUS                        | 16  | -1.97 | 0.031 |
| POSITIVE REGULATION OF MAST CELL ACTIVATION                        | 16  | -1.97 | 0.031 |
| ACUTE PHASE RESPONSE                                               | 18  | -1.97 | 0.031 |
| POSITIVE REGULATION OF NATURAL KILLER CELL MEDIATED IMMUNITY       | 11  | -1.97 | 0.031 |
| REGULATION OF ORGANELLE ASSEMBLY                                   | 162 | -1.96 | 0.031 |
| ORGANIC HYDROXY COMPOUND BIOSYNTHETIC PROCESS                      | 178 | -1.96 | 0.031 |
| SPHINGOSINE METABOLIC PROCESS                                      | 8   | -1.96 | 0.031 |
| NADP METABOLIC PROCESS                                             | 30  | -1.96 | 0.031 |
| POSITIVE REGULATION OF RESPONSE TO DNA DAMAGE STIMULUS             | 87  | -1.96 | 0.031 |
| T CELL MEDIATED IMMUNITY                                           | 61  | -1.96 | 0.032 |
| SMALL GTPASE MEDIATED SIGNAL TRANSDUCTION                          | 478 | -1.96 | 0.032 |
| G PROTEIN COUPLED PURINERGIC NUCLEOTIDE RECEPTOR SIGNALING PATHWAY | 10  | -1.96 | 0.032 |

|                                                                        |     |       |       |
|------------------------------------------------------------------------|-----|-------|-------|
| POSITIVE REGULATION OF MACROPHAGE ACTIVATION                           | 12  | -1.96 | 0.032 |
| STEROID METABOLIC PROCESS                                              | 202 | -1.96 | 0.032 |
| NEGATIVE REGULATION OF NEUROINFLAMMATORY RESPONSE                      | 10  | -1.96 | 0.032 |
| NEGATIVE REGULATION OF DNA DEPENDENT DNA REPLICATION                   | 18  | -1.96 | 0.032 |
| CELL CELL ADHESION MEDIATED BY INTEGRIN                                | 14  | -1.96 | 0.032 |
| COLLAGEN FIBRIL ORGANIZATION                                           | 49  | -1.96 | 0.032 |
| POSITIVE REGULATION OF CYTOKINE PRODUCTION INVOLVED IN IMMUNE RESPONSE | 38  | -1.96 | 0.032 |
| HISTONE H3 ACETYLATION                                                 | 56  | -1.96 | 0.032 |
| POSITIVE REGULATION OF FAT CELL DIFFERENTIATION                        | 51  | -1.95 | 0.032 |
| PYRIMIDINE NUCLEOTIDE METABOLIC PROCESS                                | 52  | -1.95 | 0.033 |
| POSITIVE REGULATION OF NUCLEOBASE CONTAINING COMPOUND TRANSPORT        | 9   | -1.95 | 0.033 |
| RESPONSE TO ACIDIC PH                                                  | 14  | -1.95 | 0.033 |
| WOUND HEALING INVOLVED IN INFLAMMATORY RESPONSE                        | 5   | -1.95 | 0.033 |
| AMINO SUGAR METABOLIC PROCESS                                          | 29  | -1.95 | 0.033 |
| REGULATION OF ALPHA BETA T CELL DIFFERENTIATION                        | 49  | -1.95 | 0.033 |
| LOW DENSITY LIPOPROTEIN PARTICLE RECEPTOR BIOSYNTHETIC PROCESS         | 9   | -1.95 | 0.033 |
| KINETOCHORE ASSEMBLY                                                   | 11  | -1.95 | 0.033 |
| POSITIVE REGULATION OF PROTEIN LOCALIZATION TO NUCLEUS                 | 67  | -1.95 | 0.034 |
| POSITIVE REGULATION OF GENE EXPRESSION EPIGENETIC                      | 47  | -1.94 | 0.034 |
| HEAD DEVELOPMENT                                                       | 544 | -1.94 | 0.034 |
| POSITIVE REGULATION OF SISTER CHROMATID COHESION                       | 9   | -1.94 | 0.034 |
| SERTOLI CELL DEVELOPMENT                                               | 12  | -1.94 | 0.034 |
| REGULATION OF T CELL APOPTOTIC PROCESS                                 | 25  | -1.94 | 0.034 |
| RESPONSE TO XENOBIOTIC STIMULUS                                        | 156 | -1.94 | 0.034 |

|                                                                                         |     |       |       |
|-----------------------------------------------------------------------------------------|-----|-------|-------|
| STEROID BIOSYNTHETIC PROCESS                                                            | 131 | -1.94 | 0.034 |
| GLYCEROLIPID BIOSYNTHETIC PROCESS                                                       | 206 | -1.94 | 0.034 |
| POSITIVE REGULATION OF ESTABLISHMENT OF PROTEIN LOCALIZATION                            | 344 | -1.94 | 0.034 |
| REGULATION OF VIRAL LIFE CYCLE                                                          | 96  | -1.94 | 0.034 |
| REGULATION OF INTEGRIN ACTIVATION                                                       | 12  | -1.94 | 0.034 |
| CYTOKINE SECRETION INVOLVED IN IMMUNE RESPONSE                                          | 13  | -1.94 | 0.035 |
| RESPONSE TO PH                                                                          | 28  | -1.94 | 0.035 |
| NEGATIVE REGULATION OF LEUKOCYTE DEGRANULATION                                          | 9   | -1.94 | 0.035 |
| HEMOGLOBIN METABOLIC PROCESS                                                            | 10  | -1.94 | 0.035 |
| DNA REPLICATION CHECKPOINT                                                              | 12  | -1.94 | 0.035 |
| LYMPHOCYTE HOMEOSTASIS                                                                  | 46  | -1.94 | 0.035 |
| NEUTRAL LIPID BIOSYNTHETIC PROCESS                                                      | 34  | -1.93 | 0.035 |
| REGULATION OF NATURAL KILLER CELL ACTIVATION                                            | 21  | -1.93 | 0.035 |
| NEGATIVE REGULATION OF EXTRINSIC APOPTOTIC SIGNALING PATHWAY VIA DEATH DOMAIN RECEPTORS | 28  | -1.93 | 0.036 |
| RESPONSE TO DOPAMINE                                                                    | 42  | -1.93 | 0.036 |
| NEUTROPHIL EXTRAVASATION                                                                | 12  | -1.93 | 0.036 |
| RESPONSE TO DSRNA                                                                       | 34  | -1.93 | 0.036 |
| NEGATIVE REGULATION OF REPRODUCTIVE PROCESS                                             | 32  | -1.93 | 0.036 |
| RNA PHOSPHODIESTER BOND HYDROLYSIS                                                      | 123 | -1.93 | 0.037 |
| T HELPER 1 CELL DIFFERENTIATION                                                         | 17  | -1.93 | 0.037 |
| REGULATION OF VIRAL TRANSCRIPTION                                                       | 54  | -1.93 | 0.037 |
| REGULATION OF T CELL MEDIATED IMMUNITY                                                  | 44  | -1.93 | 0.037 |
| COPPER ION IMPORT                                                                       | 5   | -1.93 | 0.037 |
| POLY N ACETYLLACTOSAMINE METABOLIC PROCESS                                              | 6   | -1.93 | 0.037 |
| REGULATION OF PROTEOLYSIS                                                               | 512 | -1.92 | 0.037 |
| NUCLEAR PORE COMPLEX ASSEMBLY                                                           | 9   | -1.92 | 0.037 |
| REGULATION OF PROTEIN LOCALIZATION TO NUCLEUS                                           | 104 | -1.92 | 0.037 |

|                                                                  |     |       |       |
|------------------------------------------------------------------|-----|-------|-------|
| POSITIVE REGULATION OF ISOTYPE SWITCHING                         | 19  | -1.92 | 0.037 |
| REGULATION OF FC RECEPTOR MEDIATED STIMULATORY SIGNALING PATHWAY | 10  | -1.92 | 0.038 |
| REGULATION OF NIK NF KAPPAB SIGNALING                            | 82  | -1.92 | 0.038 |
| EXTRINSIC APOPTOTIC SIGNALING PATHWAY VIA DEATH DOMAIN RECEPTORS | 69  | -1.92 | 0.038 |
| REGULATION OF ENDOCYTOSIS                                        | 166 | -1.92 | 0.038 |
| DNA TOPOLOGICAL CHANGE                                           | 8   | -1.92 | 0.038 |
| REGULATION OF CHROMOSOME SEPARATION                              | 51  | -1.92 | 0.038 |
| POSITIVE REGULATION OF CHEMOTAXIS                                | 101 | -1.92 | 0.038 |
| REGULATION OF CD40 SIGNALING PATHWAY                             | 5   | -1.92 | 0.038 |
| MACROPHAGE MIGRATION                                             | 32  | -1.92 | 0.038 |
| REGULATION OF MACROPHAGE MIGRATION                               | 26  | -1.92 | 0.038 |
| REGULATION OF ANGIOTENSIN LEVELS IN BLOOD                        | 7   | -1.92 | 0.038 |
| GLYCOSPHINGOLIPID METABOLIC PROCESS                              | 52  | -1.92 | 0.038 |
| ZINC ION HOMEOSTASIS                                             | 19  | -1.92 | 0.038 |
| B CELL ACTIVATION INVOLVED IN IMMUNE RESPONSE                    | 57  | -1.91 | 0.039 |
| NEUTROPHIL APOPTOTIC PROCESS                                     | 6   | -1.91 | 0.039 |
| PHOSPHOLIPID METABOLIC PROCESS                                   | 343 | -1.91 | 0.039 |
| NEGATIVE REGULATION OF TOLL LIKE RECEPTOR 4 SIGNALING PATHWAY    | 5   | -1.91 | 0.039 |
| THROMBIN ACTIVATED RECEPTOR SIGNALING PATHWAY                    | 9   | -1.91 | 0.040 |
| REGULATION OF TYPE 2 IMMUNE RESPONSE                             | 22  | -1.91 | 0.040 |
| PHOSPHORYLATION OF RNA POLYMERASE II C TERMINAL DOMAIN           | 11  | -1.91 | 0.040 |
| RESPONSE TO ANTIMETABOLITE                                       | 14  | -1.91 | 0.040 |
| SEROTONIN SECRETION                                              | 5   | -1.91 | 0.040 |
| DENDRITIC CELL ANTIGEN PROCESSING AND PRESENTATION               | 10  | -1.91 | 0.040 |
| PLATELET ACTIVATING FACTOR METABOLIC PROCESS                     | 5   | -1.91 | 0.040 |
| CELLULAR RESPONSE TO PEPTIDE                                     | 298 | -1.90 | 0.040 |
| CELLULAR RESPONSE TO ALCOHOL                                     | 66  | -1.90 | 0.041 |

|                                                            |     |       |       |
|------------------------------------------------------------|-----|-------|-------|
| NEGATIVE REGULATION OF MYELOID LEUKOCYTE MEDIATED IMMUNITY | 9   | -1.90 | 0.041 |
| NEGATIVE REGULATION OF PROTEIN POLYMERIZATION              | 57  | -1.90 | 0.042 |
| SPHINGOLIPID METABOLIC PROCESS                             | 119 | -1.90 | 0.042 |
| POSITIVE REGULATION OF T CELL MIGRATION                    | 23  | -1.89 | 0.043 |
| ANTIBIOTIC METABOLIC PROCESS                               | 63  | -1.89 | 0.043 |
| IONOTROPIC GLUTAMATE RECEPTOR SIGNALING PATHWAY            | 10  | -1.89 | 0.043 |
| CYTOKINE PRODUCTION INVOLVED IN INFLAMMATORY RESPONSE      | 28  | -1.89 | 0.043 |
| DENDRITIC CELL CYTOKINE PRODUCTION                         | 12  | -1.89 | 0.044 |
| NEGATIVE REGULATION OF INTERLEUKIN 10 PRODUCTION           | 13  | -1.89 | 0.044 |
| REGULATION OF EXOCYTOSIS                                   | 153 | -1.89 | 0.044 |
| REGULATION OF PLASMINOGEN ACTIVATION                       | 11  | -1.89 | 0.044 |
| POSITIVE REGULATION OF LYMPHOCYTE MIGRATION                | 26  | -1.89 | 0.044 |
| REGULATION OF LIPID METABOLIC PROCESS                      | 325 | -1.88 | 0.045 |
| SECOND MESSENGER MEDIATED SIGNALING                        | 274 | -1.88 | 0.045 |
| DNA TEMPLATED TRANSCRIPTION ELONGATION                     | 101 | -1.88 | 0.045 |
| SPHINGOLIPID BIOSYNTHETIC PROCESS                          | 75  | -1.88 | 0.045 |
| SPHINGOID METABOLIC PROCESS                                | 11  | -1.88 | 0.045 |
| RESPONSE TO LIPOTEICHOIC ACID                              | 9   | -1.88 | 0.045 |
| AUDITORY RECEPTOR CELL MORPHOGENESIS                       | 10  | -1.88 | 0.045 |
| COFACTOR CATABOLIC PROCESS                                 | 36  | -1.88 | 0.046 |
| NCRNA TRANSCRIPTION                                        | 99  | -1.88 | 0.046 |
| LIPID CATABOLIC PROCESS                                    | 220 | -1.88 | 0.046 |
| ANION HOMEOSTASIS                                          | 37  | -1.88 | 0.046 |
| NEGATIVE REGULATION OF VIRAL LIFE CYCLE                    | 44  | -1.88 | 0.046 |
| REGULATION OF CELL ADHESION MEDIATED BY INTEGRIN           | 39  | -1.87 | 0.047 |
| TUMOR NECROSIS FACTOR SECRETION                            | 20  | -1.87 | 0.047 |
| LIPID HOMEOSTASIS                                          | 93  | -1.87 | 0.048 |

|                                                                                                |     |       |       |
|------------------------------------------------------------------------------------------------|-----|-------|-------|
| NEUTROPHIL DIFFERENTIATION                                                                     | 8   | -1.87 | 0.048 |
| DNA METHYLATION                                                                                | 43  | -1.87 | 0.048 |
| REGULATION OF DNA DAMAGE RESPONSE SIGNAL<br>TRANSDUCTION BY P53 CLASS MEDIATOR                 | 32  | -1.87 | 0.048 |
| POSITIVE REGULATION OF DNA RECOMBINATION                                                       | 31  | -1.87 | 0.048 |
| NEGATIVE REGULATION OF REGULATED<br>SECRETORY PATHWAY                                          | 18  | -1.87 | 0.048 |
| REGULATION OF ENDOPLASMIC RETICULUM<br>STRESS INDUCED INTRINSIC APOPTOTIC SIGNALING<br>PATHWAY | 29  | -1.87 | 0.048 |
| FEMALE MEIOTIC NUCLEAR DIVISION                                                                | 22  | -1.87 | 0.048 |
| RESPONSE TO THYROID HORMONE                                                                    | 20  | -1.87 | 0.049 |
| SUPEROXIDE METABOLIC PROCESS                                                                   | 46  | -1.86 | 0.049 |
| NEGATIVE REGULATION OF CHROMOSOME<br>ORGANIZATION                                              | 114 | -1.86 | 0.049 |
| NEUTROPHIL CLEARANCE                                                                           | 5   | -1.86 | 0.049 |
| COMPLEMENT ACTIVATION ALTERNATIVE PATHWAY                                                      | 8   | -1.86 | 0.049 |
| PYRIMIDINE CONTAINING COMPOUND METABOLIC<br>PROCESS                                            | 74  | -1.86 | 0.049 |
| REGULATION OF LEUKOCYTE CHEMOTAXIS                                                             | 78  | -1.86 | 0.049 |
| INTERLEUKIN 2 PRODUCTION                                                                       | 51  | -1.86 | 0.050 |
| REGULATION OF HISTONE MODIFICATION                                                             | 121 | -1.86 | 0.050 |
| ENDOPLASMIC RETICULUM TO GOLGI VESICLE<br>MEDIATED TRANSPORT                                   | 166 | -1.86 | 0.050 |

---

Table 3S. GO Bone Resorption (GO:0045453) genes ranked by GSEA [57] according to expression differences in hibernating phenotype comparing to summer active animals. Rank in gene list indicates position of the gene in the ranked list of all genes. Rank metric scores – defines position of the gene in the ranked list. Running enrichment score (ES) reflects the degree to which a gene set is overrepresented at the top or bottom of a ranked list of genes. Core enrichment - the subset of down-regulated genes that contributes most to the enrichment of bone resorption by under expressed genes (NES = -2.87, Table 1) is on the bottom of the ranked list.

| Row | Gene Symbol | Rank In Gene List | Rank Metric Score | Running ES | Core Enrichment |
|-----|-------------|-------------------|-------------------|------------|-----------------|
| 1   | PPARGC1B    | 585               | 6.552232          | -0.02237   | No              |
| 2   | PDK4        | 641               | 5.952428          | -0.00559   | No              |
| 3   | NOX4        | 1189              | 3.610009          | -0.02515   | No              |
| 4   | PRKCA       | 2280              | 2.255146          | -0.08481   | No              |
| 5   | S1PR1       | 2542              | 2.069265          | -0.08325   | No              |
| 6   | P2RX7       | 2636              | 2.015344          | -0.06928   | No              |
| 7   | ADRB2       | 2948              | 1.859373          | -0.07142   | No              |
| 8   | TMEM64      | 3625              | 1.592993          | -0.1005    | No              |
| 9   | DEF8        | 4562              | 1.317232          | -0.14879   | No              |
| 10  | EGFR        | 4716              | 1.283268          | -0.13925   | No              |
| 11  | NCDN        | 6173              | 1.016641          | -0.22594   | No              |
| 12  | CTNNB1      | 6246              | 1.003771          | -0.21042   | No              |
| 13  | LTBP3       | 6378              | -1.01596          | -0.19926   | No              |
| 14  | TRAF6       | 6927              | -1.10003          | -0.21889   | No              |
| 15  | NF1         | 7159              | -1.14425          | -0.21512   | No              |
| 16  | RAC1        | 7289              | -1.16586          | -0.20381   | No              |
| 17  | ATP6AP1     | 8964              | -1.50259          | -0.30659   | No              |
| 18  | GPR137      | 9395              | -1.61668          | -0.31751   | <b>Yes</b>      |
| 19  | PLEKHM1     | 9664              | -1.70595          | -0.31647   | <b>Yes</b>      |
| 20  | TNFRSF11B   | 9734              | -1.72695          | -0.30073   | <b>Yes</b>      |
| 21  | GPR137B     | 9922              | -1.79158          | -0.29371   | <b>Yes</b>      |
| 22  | TFRC        | 10131             | -1.86873          | -0.28823   | <b>Yes</b>      |
| 23  | TPP1        | 10182             | -1.89307          | -0.27109   | <b>Yes</b>      |
| 24  | LRRK1       | 10473             | -2.01486          | -0.27167   | <b>Yes</b>      |

|    |           |       |          |          |            |
|----|-----------|-------|----------|----------|------------|
| 25 | TNFRSF11A | 11336 | -2.63172 | -0.31449 | <b>Yes</b> |
| 26 | TMEM119   | 11369 | -2.66523 | -0.29602 | <b>Yes</b> |
| 27 | CTSK      | 11440 | -2.74643 | -0.28036 | <b>Yes</b> |
| 28 | IL7       | 11484 | -2.79916 | -0.2627  | <b>Yes</b> |
| 29 | PTH1R     | 11630 | -2.98418 | -0.25258 | <b>Yes</b> |
| 30 | CD38      | 11965 | -3.52099 | -0.25641 | <b>Yes</b> |
| 31 | TNFAIP3   | 12123 | -3.84348 | -0.24717 | <b>Yes</b> |
| 32 | CSF1R     | 12206 | -4.03913 | -0.23239 | <b>Yes</b> |
| 33 | SRC       | 12215 | -4.07613 | -0.21215 | <b>Yes</b> |
| 34 | RAB3D     | 12297 | -4.35766 | -0.19729 | <b>Yes</b> |
| 35 | CSK       | 12398 | -4.71337 | -0.18384 | <b>Yes</b> |
| 36 | UBASH3B   | 12601 | -5.74487 | -0.17793 | <b>Yes</b> |
| 37 | TCIRG1    | 12643 | -6.00869 | -0.16012 | <b>Yes</b> |
| 38 | SPP1      | 12655 | -6.08426 | -0.1401  | <b>Yes</b> |
| 39 | BGLAP     | 12662 | -6.12169 | -0.11971 | <b>Yes</b> |
| 40 | ACP5      | 12724 | -6.47558 | -0.10338 | <b>Yes</b> |
| 41 | INPP5D    | 13126 | -12.3923 | -0.11216 | <b>Yes</b> |
| 42 | ITGB3     | 13198 | -14.65   | -0.09657 | <b>Yes</b> |
| 43 | SYK       | 13299 | -17.8806 | -0.08312 | <b>Yes</b> |
| 44 | PTK2B     | 13409 | -24.5551 | -0.07034 | <b>Yes</b> |
| 45 | CA2       | 13411 | -24.66   | -0.04958 | <b>Yes</b> |
| 46 | ADAM8     | 13413 | -24.8555 | -0.02882 | <b>Yes</b> |
| 47 | SNX10     | 13418 | -25.5358 | -0.00828 | <b>Yes</b> |
| 48 | RAC2      | 13432 | -28.2501 | 0.011594 | <b>Yes</b> |

---

Table 45. GO Ossification (GO:0001503) genes ranked by GSEA [57] according to expression differences in hibernating phenotype comparing to summer active animals. Rank in gene list indicates position of the gene in the ranked list of all genes. Rank metric scores – defines position of the gene in the ranked list. Running enrichment score (ES) reflects the degree to which a gene set is overrepresented at the top or bottom of a ranked list of genes. Core enrichment - the subset of down-regulated genes that contributes most to the non-significant enrichment of ossification (NES = -1.45, FDR = 0.220, Table 1) by under expressed genes.

| Row | Gene Symbol | Rank In Gene List | Rank Metric Score | Running ES | Core Enrichment |
|-----|-------------|-------------------|-------------------|------------|-----------------|
| 1   | FZD9        | 85                | 44.41041          | -0.00297   | No              |
| 2   | RYR1        | 86                | 44.37972          | 4.57E-04   | No              |
| 3   | COL2A1      | 109               | 40.31741          | 0.002228   | No              |
| 4   | MN1         | 216               | 22.24195          | -0.00232   | No              |
| 5   | ACVR2B      | 363               | 10.97933          | -0.00987   | No              |
| 6   | BMPR1B      | 366               | 10.95325          | -0.0066    | No              |
| 7   | FHL2        | 424               | 9.08148           | -0.00746   | No              |
| 8   | AXIN2       | 566               | 6.768892          | -0.01464   | No              |
| 9   | ESRRA       | 575               | 6.679886          | -0.01182   | No              |
| 10  | PPARGC1B    | 585               | 6.552232          | -0.00907   | No              |
| 11  | SCX         | 612               | 6.290541          | -0.0076    | No              |
| 12  | WNT11       | 652               | 5.886754          | -0.00711   | No              |
| 13  | MEF2C       | 722               | 5.44419           | -0.00887   | No              |
| 14  | CYR61       | 805               | 4.908345          | -0.01161   | No              |
| 15  | TOB1        | 819               | 4.861364          | -0.00917   | No              |
| 16  | TGFB2       | 846               | 4.711645          | -0.0077    | No              |
| 17  | PAM16       | 888               | 4.517055          | -0.00735   | No              |
| 18  | ATP5F1B     | 893               | 4.498354          | -0.00423   | No              |
| 19  | KREMEN1     | 903               | 4.462406          | -0.00148   | No              |
| 20  | MEF2D       | 942               | 4.307003          | -9.16E-04  | No              |
| 21  | WNT10B      | 954               | 4.27075           | 0.001682   | No              |
| 22  | ZBTB16      | 959               | 4.249826          | 0.004806   | No              |

|    |            |      |          |           |    |
|----|------------|------|----------|-----------|----|
| 23 | WNT4       | 960  | 4.248253 | 0.00823   | No |
| 24 | RDH14      | 1026 | 4.053619 | 0.006767  | No |
| 25 | PDLIM7     | 1056 | 3.970432 | 0.008011  | No |
| 26 | MYOC       | 1116 | 3.803393 | 0.006999  | No |
| 27 | SBDS       | 1148 | 3.740005 | 0.008092  | No |
| 28 | ID1        | 1253 | 3.461663 | 0.003696  | No |
| 29 | IGFBP3     | 1284 | 3.391406 | 0.004865  | No |
| 30 | PTN        | 1443 | 3.152027 | -0.00359  | No |
| 31 | LIMD1      | 1477 | 3.097736 | -0.00265  | No |
| 32 | RPL38      | 1478 | 3.096636 | 7.76E-04  | No |
| 33 | PBX1       | 1491 | 3.081328 | 0.003298  | No |
| 34 | THRA       | 1600 | 2.918083 | -0.0014   | No |
| 35 | OSR1       | 1668 | 2.832593 | -0.00301  | No |
| 36 | SOX8       | 1708 | 2.786111 | -0.00252  | No |
| 37 | ACVR2A     | 1725 | 2.765061 | -2.99E-04 | No |
| 38 | LGR4       | 1825 | 2.658684 | -0.00432  | No |
| 39 | COL11A1    | 1958 | 2.516644 | -0.01082  | No |
| 40 | ASPN       | 1963 | 2.51369  | -0.0077   | No |
| 41 | TOB2       | 1987 | 2.490378 | -0.006    | No |
| 42 | NELL1      | 2002 | 2.477811 | -0.00363  | No |
| 43 | BMPR1A     | 2020 | 2.464702 | -0.00148  | No |
| 44 | PTCH1      | 2120 | 2.374346 | -0.0055   | No |
| 45 | FBN2       | 2141 | 2.356641 | -0.00358  | No |
| 46 | CHRD       | 2198 | 2.319417 | -0.00437  | No |
| 47 | SFRP2      | 2223 | 2.29926  | -0.00275  | No |
| 48 | TEK        | 2326 | 2.223473 | -0.007    | No |
| 49 | FAT4       | 2336 | 2.215351 | -0.00425  | No |
| 50 | KLF10      | 2367 | 2.194227 | -0.00308  | No |
| 51 | CSGALNACT1 | 2372 | 2.19019  | 4.48E-05  | No |

|    |          |      |          |           |    |
|----|----------|------|----------|-----------|----|
| 52 | PRKACA   | 2469 | 2.120383 | -0.00375  | No |
| 53 | HDAC8    | 2515 | 2.087945 | -0.00371  | No |
| 54 | S1PR1    | 2542 | 2.069265 | -0.00224  | No |
| 55 | P2RX7    | 2636 | 2.015344 | -0.00581  | No |
| 56 | FGFR3    | 2751 | 1.957225 | -0.01096  | No |
| 57 | DHRS3    | 2794 | 1.931193 | -0.01069  | No |
| 58 | FSTL3    | 2831 | 1.912486 | -0.00997  | No |
| 59 | SMAD1    | 2842 | 1.907486 | -0.0073   | No |
| 60 | ZHX3     | 2924 | 1.869929 | -0.00997  | No |
| 61 | ADRB2    | 2948 | 1.859373 | -0.00827  | No |
| 62 | GDF5     | 2960 | 1.855842 | -0.00567  | No |
| 63 | WWTR1    | 3006 | 1.83151  | -0.00563  | No |
| 64 | ACVR1    | 3021 | 1.824415 | -0.00326  | No |
| 65 | ID4      | 3042 | 1.814729 | -0.00134  | No |
| 66 | GTPBP4   | 3049 | 1.810515 | 0.001633  | No |
| 67 | CTNNBIP1 | 3096 | 1.789065 | 0.001598  | No |
| 68 | DHH      | 3138 | 1.770452 | 0.00194   | No |
| 69 | FGF18    | 3143 | 1.767204 | 0.005064  | No |
| 70 | PHB      | 3258 | 1.727516 | -8.45E-05 | No |
| 71 | BMP6     | 3301 | 1.710551 | 1.82E-04  | No |
| 72 | PSMC2    | 3430 | 1.663264 | -0.00602  | No |
| 73 | CEBPB    | 3440 | 1.658558 | -0.00327  | No |
| 74 | NBR1     | 3444 | 1.657959 | -7.21E-05 | No |
| 75 | STC1     | 3448 | 1.657632 | 0.003127  | No |
| 76 | RPS15    | 3478 | 1.645544 | 0.004371  | No |
| 77 | JAG1     | 3484 | 1.643701 | 0.007419  | No |
| 78 | LRP5     | 3603 | 1.599047 | 0.001971  | No |
| 79 | TMEM64   | 3625 | 1.592993 | 0.003816  | No |
| 80 | EPHA2    | 3636 | 1.590183 | 0.006489  | No |

|     |         |      |          |           |    |
|-----|---------|------|----------|-----------|----|
| 81  | MAPK3   | 3642 | 1.588164 | 0.009537  | No |
| 82  | BMP5    | 3643 | 1.587673 | 0.012962  | No |
| 83  | BMP4    | 3670 | 1.5805   | 0.014432  | No |
| 84  | NPR2    | 3707 | 1.56776  | 0.015149  | No |
| 85  | ERCC2   | 3778 | 1.540374 | 0.01331   | No |
| 86  | SUFU    | 3886 | 1.509224 | 0.008688  | No |
| 87  | ID3     | 3901 | 1.504271 | 0.01106   | No |
| 88  | PTK2    | 3991 | 1.477389 | 0.007792  | No |
| 89  | HSPE1   | 4149 | 1.432703 | -5.90E-04 | No |
| 90  | SOX9    | 4230 | 1.412182 | -0.00318  | No |
| 91  | TAPT1   | 4244 | 1.407326 | -7.34E-04 | No |
| 92  | BMPR2   | 4348 | 1.376451 | -0.00505  | No |
| 93  | MYBBP1A | 4416 | 1.356628 | -0.00667  | No |
| 94  | BCOR    | 4429 | 1.351345 | -0.00415  | No |
| 95  | RXRA    | 4439 | 1.349107 | -0.0014   | No |
| 96  | INPPL1  | 4496 | 1.335281 | -0.00218  | No |
| 97  | NAB2    | 4514 | 1.331397 | -3.86E-05 | No |
| 98  | PLXNB1  | 4518 | 1.330342 | 0.00316   | No |
| 99  | ATRAID  | 4537 | 1.324868 | 0.005232  | No |
| 100 | SMAD6   | 4669 | 1.295229 | -0.00119  | No |
| 101 | EGFR    | 4716 | 1.283268 | -0.00123  | No |
| 102 | PIAS2   | 4749 | 1.275592 | -2.11E-04 | No |
| 103 | IGFBP5  | 4765 | 1.272363 | 0.002085  | No |
| 104 | HOXA2   | 4922 | 1.239201 | -0.00622  | No |
| 105 | SMURF1  | 4946 | 1.23498  | -0.00453  | No |
| 106 | GLI1    | 4969 | 1.231047 | -0.00276  | No |
| 107 | DCHS1   | 4975 | 1.230464 | 2.93E-04  | No |
| 108 | TUFT1   | 5012 | 1.220605 | 0.001011  | No |
| 109 | CTGF    | 5146 | 1.192969 | -0.00557  | No |

|     |        |      |          |           |    |
|-----|--------|------|----------|-----------|----|
| 110 | SMAD3  | 5216 | 1.180675 | -0.00733  | No |
| 111 | AKT1   | 5232 | 1.177399 | -0.00503  | No |
| 112 | PKDCC  | 5247 | 1.17457  | -0.00266  | No |
| 113 | FBXL15 | 5264 | 1.169848 | -4.40E-04 | No |
| 114 | CLEC3B | 5327 | 1.159333 | -0.00168  | No |
| 115 | UFL1   | 5344 | 1.156117 | 5.43E-04  | No |
| 116 | HDAC7  | 5348 | 1.155275 | 0.003742  | No |
| 117 | RIOX1  | 5409 | 1.14384  | 0.002655  | No |
| 118 | TGFB3  | 5603 | 1.111189 | -0.00843  | No |
| 119 | MMP2   | 5630 | 1.107567 | -0.00696  | No |
| 120 | OSR2   | 5708 | 1.093254 | -0.00933  | No |
| 121 | EXT1   | 5763 | 1.085759 | -0.00997  | No |
| 122 | BCL2   | 5823 | 1.077137 | -0.01098  | No |
| 123 | LRP6   | 5857 | 1.071088 | -0.01003  | No |
| 124 | CCDC47 | 5869 | 1.069238 | -0.00744  | No |
| 125 | SKI    | 5903 | 1.063881 | -0.00649  | No |
| 126 | IMPAD1 | 5967 | 1.052245 | -0.00781  | No |
| 127 | ZBTB40 | 6040 | 1.039423 | -0.0098   | No |
| 128 | IGSF10 | 6098 | 1.0296   | -0.01066  | No |
| 129 | EGR2   | 6100 | 1.029376 | -0.00731  | No |
| 130 | ANKH   | 6135 | 1.024233 | -0.00644  | No |
| 131 | GLI2   | 6159 | 1.018865 | -0.00475  | No |
| 132 | CTNNB1 | 6246 | 1.003771 | -0.00779  | No |
| 133 | IARS   | 6316 | -1.00618 | -0.00955  | No |
| 134 | MMP14  | 6371 | -1.01441 | -0.01019  | No |
| 135 | RRAS2  | 6376 | -1.01505 | -0.00707  | No |
| 136 | PHEX   | 6385 | -1.01688 | -0.00424  | No |
| 137 | GLI3   | 6406 | -1.02026 | -0.00232  | No |
| 138 | PEX7   | 6453 | -1.02819 | -0.00236  | No |

|     |          |      |          |          |            |
|-----|----------|------|----------|----------|------------|
| 139 | SEMA7A   | 6642 | -1.05399 | -0.01307 | No         |
| 140 | NPNT     | 6737 | -1.06893 | -0.01671 | No         |
| 141 | TRAF6    | 6927 | -1.10003 | -0.0275  | No         |
| 142 | SYNCRIP  | 6967 | -1.10623 | -0.02701 | No         |
| 143 | ANO6     | 7058 | -1.12188 | -0.03035 | No         |
| 144 | GPC3     | 7074 | -1.12633 | -0.02806 | No         |
| 145 | HDAC4    | 7076 | -1.12665 | -0.02471 | No         |
| 146 | NF1      | 7159 | -1.14425 | -0.02745 | No         |
| 147 | SHOX2    | 7205 | -1.1501  | -0.02741 | No         |
| 148 | SNAI2    | 7356 | -1.17967 | -0.03526 | No         |
| 149 | FGF9     | 7524 | -1.21086 | -0.0444  | No         |
| 150 | ROR2     | 7559 | -1.21653 | -0.04353 | No         |
| 151 | TWSG1    | 7573 | -1.21845 | -0.04108 | No         |
| 152 | NAB1     | 7644 | -1.23199 | -0.04292 | No         |
| 153 | CITED1   | 7671 | -1.23646 | -0.04145 | No         |
| 154 | SH3PXD2B | 7677 | -1.23731 | -0.0384  | No         |
| 155 | GJA1     | 7752 | -1.24942 | -0.04054 | No         |
| 156 | GPLD1    | 7775 | -1.25335 | -0.03877 | No         |
| 157 | SLC26A2  | 7840 | -1.26459 | -0.04016 | No         |
| 158 | NOCT     | 7969 | -1.28608 | -0.04636 | No         |
| 159 | SMO      | 7971 | -1.2868  | -0.04301 | No         |
| 160 | FBL      | 8068 | -1.30509 | -0.04681 | No         |
| 161 | ENPP1    | 8074 | -1.30577 | -0.04376 | No         |
| 162 | SMAD5    | 8085 | -1.30737 | -0.04108 | No         |
| 163 | ACHE     | 8264 | -1.34323 | -0.05105 | No         |
| 164 | WNT5A    | 8276 | -1.34493 | -0.04845 | No         |
| 165 | CHRD1    | 8365 | -1.3665  | -0.05164 | <b>Yes</b> |
| 166 | DHX36    | 8394 | -1.37412 | -0.05032 | <b>Yes</b> |
| 167 | MAPK1    | 8450 | -1.38569 | -0.05103 | <b>Yes</b> |

|     |          |      |          |          |            |
|-----|----------|------|----------|----------|------------|
| 168 | SNRNP200 | 8478 | -1.39221 | -0.04964 | <b>Yes</b> |
| 169 | DDR2     | 8488 | -1.39438 | -0.04689 | <b>Yes</b> |
| 170 | IL6ST    | 8567 | -1.4104  | -0.04933 | <b>Yes</b> |
| 171 | TP53INP2 | 8593 | -1.41609 | -0.04779 | <b>Yes</b> |
| 172 | DDX21    | 8619 | -1.42139 | -0.04624 | <b>Yes</b> |
| 173 | IGF2     | 8653 | -1.43059 | -0.0453  | <b>Yes</b> |
| 174 | EXT2     | 8688 | -1.4389  | -0.04443 | <b>Yes</b> |
| 175 | SEMA4D   | 8769 | -1.45704 | -0.04702 | <b>Yes</b> |
| 176 | TRPM4    | 8782 | -1.4596  | -0.0445  | <b>Yes</b> |
| 177 | LRP4     | 8838 | -1.47257 | -0.04521 | <b>Yes</b> |
| 178 | ASF1A    | 8864 | -1.47983 | -0.04367 | <b>Yes</b> |
| 179 | FOXC1    | 8896 | -1.48823 | -0.04257 | <b>Yes</b> |
| 180 | BMP7     | 8931 | -1.49446 | -0.04171 | <b>Yes</b> |
| 181 | KAZALD1  | 8961 | -1.50175 | -0.04046 | <b>Yes</b> |
| 182 | ATP6AP1  | 8964 | -1.50259 | -0.03719 | <b>Yes</b> |
| 183 | DDX5     | 9001 | -1.50868 | -0.03647 | <b>Yes</b> |
| 184 | TXLNG    | 9089 | -1.53334 | -0.03959 | <b>Yes</b> |
| 185 | RSL1D1   | 9115 | -1.53822 | -0.03804 | <b>Yes</b> |
| 186 | ID2      | 9295 | -1.58467 | -0.04808 | <b>Yes</b> |
| 187 | FOXC2    | 9296 | -1.5858  | -0.04465 | <b>Yes</b> |
| 188 | BMP2     | 9328 | -1.59553 | -0.04356 | <b>Yes</b> |
| 189 | SNAI1    | 9368 | -1.60919 | -0.04307 | <b>Yes</b> |
| 190 | SMOC1    | 9379 | -1.61196 | -0.0404  | <b>Yes</b> |
| 191 | RBMX     | 9396 | -1.6169  | -0.03817 | <b>Yes</b> |
| 192 | FZD1     | 9420 | -1.62758 | -0.03648 | <b>Yes</b> |
| 193 | HIF1A    | 9433 | -1.63337 | -0.03396 | <b>Yes</b> |
| 194 | SP3      | 9439 | -1.63569 | -0.03091 | <b>Yes</b> |
| 195 | GREM1    | 9447 | -1.63799 | -0.02801 | <b>Yes</b> |
| 196 | HNRNPU   | 9505 | -1.65709 | -0.02887 | <b>Yes</b> |

|     |          |       |          |          |            |
|-----|----------|-------|----------|----------|------------|
| 197 | CAT      | 9543  | -1.66617 | -0.02823 | <b>Yes</b> |
| 198 | CLEC11A  | 9551  | -1.66846 | -0.02533 | <b>Yes</b> |
| 199 | HSD17B4  | 9625  | -1.69189 | -0.0274  | <b>Yes</b> |
| 200 | SFRP1    | 9662  | -1.70569 | -0.02668 | <b>Yes</b> |
| 201 | TNC      | 9705  | -1.71851 | -0.02641 | <b>Yes</b> |
| 202 | PHOSPHO1 | 9806  | -1.75118 | -0.03051 | <b>Yes</b> |
| 203 | INTU     | 9831  | -1.75892 | -0.02889 | <b>Yes</b> |
| 204 | SLC8A1   | 9849  | -1.7648  | -0.02674 | <b>Yes</b> |
| 205 | TWIST1   | 9901  | -1.78393 | -0.02715 | <b>Yes</b> |
| 206 | ITGA11   | 9912  | -1.78786 | -0.02448 | <b>Yes</b> |
| 207 | RBPJ     | 9954  | -1.80121 | -0.02414 | <b>Yes</b> |
| 208 | PRKD1    | 9971  | -1.80762 | -0.02192 | <b>Yes</b> |
| 209 | GPM6B    | 10012 | -1.82414 | -0.0215  | <b>Yes</b> |
| 210 | MEN1     | 10017 | -1.82559 | -0.01838 | <b>Yes</b> |
| 211 | CSF1     | 10033 | -1.83093 | -0.01608 | <b>Yes</b> |
| 212 | TPM4     | 10046 | -1.83434 | -0.01356 | <b>Yes</b> |
| 213 | RHOA     | 10142 | -1.87576 | -0.01728 | <b>Yes</b> |
| 214 | NIPBL    | 10157 | -1.8826  | -0.0149  | <b>Yes</b> |
| 215 | FGFR2    | 10173 | -1.88761 | -0.01261 | <b>Yes</b> |
| 216 | ALOX15   | 10270 | -1.93085 | -0.0164  | <b>Yes</b> |
| 217 | GDF10    | 10293 | -1.93716 | -0.01463 | <b>Yes</b> |
| 218 | BCAP29   | 10389 | -1.97468 | -0.01835 | <b>Yes</b> |
| 219 | COL6A1   | 10449 | -2.00236 | -0.01936 | <b>Yes</b> |
| 220 | ALYREF   | 10539 | -2.05807 | -0.02263 | <b>Yes</b> |
| 221 | CDH11    | 10551 | -2.06147 | -0.02003 | <b>Yes</b> |
| 222 | HNRNPC   | 10552 | -2.06197 | -0.01661 | <b>Yes</b> |
| 223 | ECM1     | 10582 | -2.07768 | -0.01537 | <b>Yes</b> |
| 224 | GDPD2    | 10609 | -2.09343 | -0.0139  | <b>Yes</b> |
| 225 | OMD      | 10676 | -2.13253 | -0.01543 | <b>Yes</b> |

|     |           |       |          |          |            |
|-----|-----------|-------|----------|----------|------------|
| 226 | CBFB      | 10680 | -2.13583 | -0.01224 | <b>Yes</b> |
| 227 | CHSY1     | 10687 | -2.14004 | -0.00926 | <b>Yes</b> |
| 228 | MMP16     | 10704 | -2.14879 | -0.00704 | <b>Yes</b> |
| 229 | PTGER4    | 10742 | -2.16505 | -0.0064  | <b>Yes</b> |
| 230 | IGF1      | 10806 | -2.20048 | -0.00771 | <b>Yes</b> |
| 231 | DHX9      | 10821 | -2.21088 | -0.00534 | <b>Yes</b> |
| 232 | EIF2AK3   | 10826 | -2.21263 | -0.00222 | <b>Yes</b> |
| 233 | ADAR      | 10920 | -2.28006 | -0.00578 | <b>Yes</b> |
| 234 | WVOX      | 10933 | -2.28466 | -0.00326 | <b>Yes</b> |
| 235 | SND1      | 10958 | -2.30432 | -0.00164 | <b>Yes</b> |
| 236 | TGFB1     | 11058 | -2.38282 | -0.00566 | <b>Yes</b> |
| 237 | THBS3     | 11128 | -2.44351 | -0.00743 | <b>Yes</b> |
| 238 | CEBPA     | 11138 | -2.45531 | -0.00468 | <b>Yes</b> |
| 239 | RRBP1     | 11155 | -2.47157 | -0.00246 | <b>Yes</b> |
| 240 | CTHRC1    | 11160 | -2.47388 | 6.66E-04 | <b>Yes</b> |
| 241 | SORT1     | 11290 | -2.58218 | -0.00561 | <b>Yes</b> |
| 242 | MGP       | 11316 | -2.61021 | -0.00406 | <b>Yes</b> |
| 243 | TNFRSF11A | 11336 | -2.63172 | -0.00207 | <b>Yes</b> |
| 244 | LEP       | 11353 | -2.64546 | 1.52E-04 | <b>Yes</b> |
| 245 | CLTC      | 11355 | -2.64689 | 0.003502 | <b>Yes</b> |
| 246 | TMEM119   | 11369 | -2.66523 | 0.005949 | <b>Yes</b> |
| 247 | BMP1      | 11413 | -2.71841 | 0.00614  | <b>Yes</b> |
| 248 | MAPK14    | 11416 | -2.72048 | 0.009414 | <b>Yes</b> |
| 249 | SP7       | 11425 | -2.73138 | 0.012237 | <b>Yes</b> |
| 250 | CTSK      | 11440 | -2.74643 | 0.014609 | <b>Yes</b> |
| 251 | MRC2      | 11473 | -2.78439 | 0.015628 | <b>Yes</b> |
| 252 | SBNO2     | 11531 | -2.85679 | 0.014766 | <b>Yes</b> |
| 253 | DKK1      | 11540 | -2.87068 | 0.017589 | <b>Yes</b> |
| 254 | DNAJC13   | 11584 | -2.91538 | 0.01778  | <b>Yes</b> |

|     |         |       |          |          |            |
|-----|---------|-------|----------|----------|------------|
| 255 | PTH1R   | 11630 | -2.98418 | 0.017821 | <b>Yes</b> |
| 256 | SPARC   | 11641 | -2.99719 | 0.020493 | <b>Yes</b> |
| 257 | ILK     | 11702 | -3.0779  | 0.019406 | <b>Yes</b> |
| 258 | SUCO    | 11730 | -3.11323 | 0.0208   | <b>Yes</b> |
| 259 | BMP2K   | 11736 | -3.12884 | 0.023849 | <b>Yes</b> |
| 260 | COL5A2  | 11737 | -3.12982 | 0.027274 | <b>Yes</b> |
| 261 | HGF     | 11785 | -3.20028 | 0.027164 | <b>Yes</b> |
| 262 | IL6R    | 11806 | -3.23728 | 0.029085 | <b>Yes</b> |
| 263 | CREB3L1 | 11860 | -3.34039 | 0.028524 | <b>Yes</b> |
| 264 | COL1A1  | 11947 | -3.4877  | 0.025481 | <b>Yes</b> |
| 265 | TWIST2  | 12016 | -3.60017 | 0.023792 | <b>Yes</b> |
| 266 | RANBP3L | 12095 | -3.78213 | 0.021351 | <b>Yes</b> |
| 267 | OSTF1   | 12177 | -3.95156 | 0.018685 | <b>Yes</b> |
| 268 | MINPP1  | 12207 | -4.04056 | 0.019929 | <b>Yes</b> |
| 269 | VCAN    | 12360 | -4.56844 | 0.011923 | <b>Yes</b> |
| 270 | PTGS2   | 12365 | -4.58221 | 0.015047 | <b>Yes</b> |
| 271 | LEF1    | 12372 | -4.60697 | 0.018021 | <b>Yes</b> |
| 272 | RUNX2   | 12425 | -4.82703 | 0.017535 | <b>Yes</b> |
| 273 | FIGNL1  | 12430 | -4.84172 | 0.020659 | <b>Yes</b> |
| 274 | CLIC1   | 12500 | -5.2312  | 0.018895 | <b>Yes</b> |
| 275 | SATB2   | 12531 | -5.35763 | 0.020063 | <b>Yes</b> |
| 276 | ALPL    | 12544 | -5.44    | 0.022586 | <b>Yes</b> |
| 277 | IFITM5  | 12594 | -5.7228  | 0.022325 | <b>Yes</b> |
| 278 | RUNX1   | 12632 | -5.9808  | 0.022968 | <b>Yes</b> |
| 279 | SPP1    | 12655 | -6.08426 | 0.024738 | <b>Yes</b> |
| 280 | BGLAP   | 12662 | -6.12169 | 0.027711 | <b>Yes</b> |
| 281 | RFLNB   | 12716 | -6.43077 | 0.027151 | <b>Yes</b> |
| 282 | ISG15   | 12735 | -6.52854 | 0.029222 | <b>Yes</b> |
| 283 | RUNX3   | 12818 | -7.24361 | 0.02648  | <b>Yes</b> |

|     |        |       |          |           |            |
|-----|--------|-------|----------|-----------|------------|
| 284 | GPNMB  | 12846 | -7.50485 | 0.027874  | <b>Yes</b> |
| 285 | RASSF2 | 12932 | -8.61452 | 0.024907  | <b>Yes</b> |
| 286 | MMP9   | 13227 | -15.4625 | 0.006223  | <b>Yes</b> |
| 287 | CDK6   | 13277 | -17.1632 | 0.005963  | <b>Yes</b> |
| 288 | PTK2B  | 13409 | -24.5551 | -4.64E-04 | <b>Yes</b> |
| 289 | FASN   | 13434 | -28.3571 | 0.001156  | <b>Yes</b> |
| 290 | SRGN   | 13497 | -36.332  | -8.14E-05 | <b>Yes</b> |
| 291 | LTF    | 13526 | -45.7429 | 0.001238  | <b>Yes</b> |
| 292 | GATA1  | 13575 | -111.062 | 0.001053  | <b>Yes</b> |

---
